# Supplementary material for: The Landscape of Isoform Switches in Human Cancers
Source: Oxford University Press journal article supplement (doi:10.1158/1541-7786.mcr-16-0459), 2017-06-05
Supplement: 15417786mcr160459-sup-175983_2_unknown_upload_4059088_hqghxc.xlsx [file 15417786mcr160459-sup-175983_2_unknown_upload_4059088_hqghxc.xlsx]

## Sheet: Sheet1
Basic Info					Gene Expression				Isoform Expression				Switch Info					Isoform Annotation
isoform_id	gene_id	condition_1	condition_2	gene_name	gene_FPKM_1	gene_FPKM_2	gene_log2_fold_change	gene_DE_q_value	iso_FPKM_1	iso_FPKM_2	iso_log2_fold_change	iso_DE_q_value	IF1	IF2	dIF	isoform_switch_q_value	gene_switch_q_value	PTC	codingPotentialValue	codingPotential	signal_peptide_identified	domain_identified	switch_consequence_in_gene	Intron Retention
uc001dsp.1	chr1:100435540..100489006,+	BRCA_ctrl	BRCA_cancer	SLC35A3	9.44859	12.8706	0.444341	1.63568e-06	5.55894	6.11853	0.138413	0.310366	0.586	0.49	-0.097	1	8.07627e-12	FALSE	0.988877	TRUE	no	yes	NA	0
uc001dsq.1	chr1:100435540..100489006,+	BRCA_ctrl	BRCA_cancer	SLC35A3	9.44859	12.8706	0.444341	1.63568e-06	2.4972	2.85579	0.193585	0.309397	0.258	0.212	-0.046	1	8.07627e-12	FALSE	0.988811	TRUE	no	yes	NA	0
uc001dsr.1	chr1:100435540..100489006,+	BRCA_ctrl	BRCA_cancer	SLC35A3	9.44859	12.8706	0.444341	1.63568e-06	0.701717	2.82688	2.0081	8.17377e-17	0.071	0.188	0.117	8.07627e-12	8.07627e-12	FALSE	0.997784	TRUE	no	yes	NA	0
uc010oul.1	chr1:104068578..104097857,+	BRCA_ctrl	BRCA_cancer	RNPC3	8.01753	4.08242	-0.993438	2.77501e-68	2.06684	0.660322	-1.64461	8.84214e-11	0.222	0.137	-0.085	1	6.53157e-09	FALSE	0.999995	TRUE	no	yes	NA	0
uc010oum.1	chr1:104068578..104097857,+	BRCA_ctrl	BRCA_cancer	RNPC3	8.01753	4.08242	-0.993438	2.77501e-68	1.8136	0.779433	-1.21705	4.81751e-12	0.215	0.176	-0.039	1	6.53157e-09	FALSE	0.999995	TRUE	no	yes	NA	0
uc010oun.1	chr1:104068578..104097857,+	BRCA_ctrl	BRCA_cancer	RNPC3	8.01753	4.08242	-0.993438	2.77501e-68	4.13709	2.64266	-0.645987	2.95194e-38	0.564	0.688	0.124	6.53157e-09	6.53157e-09	FALSE	0.999995	TRUE	no	yes	NA	0
uc001are.2	chr1:10490159..10512208,+	BRCA_ctrl	BRCA_cancer	APITD1	5.13804	9.22175	0.824241	4.27439e-43	0.0997257	1.07977	3.41724	5.08371e-49	0.018	0.118	0.099	1	2.10093e-15	FALSE	0.799394	TRUE	no	yes	NA	0
uc001arh.2	chr1:10490159..10512208,+	BRCA_ctrl	BRCA_cancer	APITD1	5.13804	9.22175	0.824241	4.27439e-43	4.93004	7.86101	0.672608	1.7738e-25	0.961	0.852	-0.11	2.10093e-15	2.10093e-15	FALSE	0.419025	TRUE	no	yes	NA	0
uc010ovc.1	chr1:109419603..109476957,+	BRCA_ctrl	BRCA_cancer	GPSM2	3.32549	9.22214	1.16656	1.7157e-31	0.840779	3.8958	2.21154	1.65839e-19	0.195	0.362	0.167	1.43581e-11	3.87051e-15	FALSE	1	TRUE	no	yes	FALSE	0
uc010ovd.1	chr1:109419603..109476957,+	BRCA_ctrl	BRCA_cancer	GPSM2	3.32549	9.22214	1.16656	1.7157e-31	0.818637	3.50403	2.09744	6.2091e-32	0.224	0.377	0.153	1	3.87051e-15	FALSE	1	TRUE	no	yes	FALSE	0
uc010ove.1	chr1:109419603..109476957,+	BRCA_ctrl	BRCA_cancer	GPSM2	3.32549	9.22214	1.16656	1.7157e-31	1.66607	1.82231	0.129435	0.0930282	0.581	0.261	-0.32	3.87051e-15	3.87051e-15	FALSE	1	TRUE	no	yes	FALSE	0
uc001dyo.2	chr1:110276554..110283660,-	BRCA_ctrl	BRCA_cancer	GSTM3	56.9682	91.8293	0.358385	0.0327428	17.0279	16.8295	-0.0169071	0.965422	0.312	0.195	-0.117	5.41728e-17	4.34457e-17	FALSE	0.995676	TRUE	no	yes	FALSE	0
uc010ovv.1	chr1:110276554..110283660,-	BRCA_ctrl	BRCA_cancer	GSTM3	56.9682	91.8293	0.358385	0.0327428	39.3326	74.0485	0.912689	2.22327e-07	0.677	0.793	0.116	4.34457e-17	4.34457e-17	FALSE	0.991927	TRUE	no	yes	FALSE	0
uc001eam.2	chr1:111770281..111786060,+	BRCA_ctrl	BRCA_cancer	CHI3L2	19.4609	27.1661	0.483876	0.0384047	16.8968	21.5224	0.349055	0.39277	0.814	0.571	-0.242	1.68845e-05	1.68845e-05	FALSE	0.999946	TRUE	yes	yes	TRUE	0
uc001ean.2	chr1:111770281..111786060,+	BRCA_ctrl	BRCA_cancer	CHI3L2	19.4609	27.1661	0.483876	0.0384047	1.93216	2.51794	0.381436	0.195231	0.142	0.3	0.158	1	1.68845e-05	FALSE	0.999911	TRUE	no	yes	TRUE	0
uc001eao.2	chr1:111770281..111786060,+	BRCA_ctrl	BRCA_cancer	CHI3L2	19.4609	27.1661	0.483876	0.0384047	0.608858	3.10764	2.34918	7.06171e-08	0.034	0.109	0.075	1	1.68845e-05	FALSE	0.99926	TRUE	no	yes	TRUE	0
uc001eba.2	chr1:111956938..111970399,-	BRCA_ctrl	BRCA_cancer	OVGP1	1.05618	1.62642	0.600813	1.4865e-06	0.607814	1.2943	1.08847	2.32939e-12	0.571	0.73	0.159	3.8754e-08	3.8754e-08	FALSE	1	TRUE	yes	yes	NA	NA
uc001ebu.1	chr1:112318454..112531777,-	BRCA_ctrl	BRCA_cancer	KCND3	1.83683	1.36074	-0.433527	0.0279551	1.78012	1.27307	-0.483375	0.187192	0.881	0.596	-0.285	0.000199787	0.000199787	FALSE	1	TRUE	yes	yes	NA	NA
uc001ate.3	chr1:11866207..11907674,+	BRCA_ctrl	BRCA_cancer	CLCN6	6.45128	3.03752	-1.13282	2.17387e-116	5.08201	1.82473	-1.47744	7.24016e-15	0.758	0.554	-0.204	0.0267458	0.0267458	FALSE	1	TRUE	no	yes	NA	0
uc001eid.2	chr1:120291005..120311518,-	BRCA_ctrl	BRCA_cancer	HMGCS2	61.3369	30.3129	-1.02077	0.000598815	58.4996	27.5417	-1.08678	0.0032332	0.892	0.68	-0.212	0.000272838	0.000272838	FALSE	0.999999	TRUE	no	yes	TRUE	0
uc001eie.2	chr1:120291005..120311518,-	BRCA_ctrl	BRCA_cancer	HMGCS2	61.3369	30.3129	-1.02077	0.000598815	1.65258	0.767015	-1.1064	0.0286866	0.032	0.111	0.079	1	0.000272838	FALSE	0.999961	TRUE	no	yes	TRUE	0
uc010oxj.1	chr1:120291005..120311518,-	BRCA_ctrl	BRCA_cancer	HMGCS2	61.3369	30.3129	-1.02077	0.000598815	1.18464	2.00415	0.757757	0.19575	0.076	0.209	0.133	0.000504574	0.000272838	FALSE	0.999995	TRUE	no	yes	TRUE	0
uc001att.2	chr1:12227060..12269276,+	BRCA_ctrl	BRCA_cancer	TNFRSF1B	19.5999	11.1068	-0.827168	4.23434e-20	12.2107	4.81916	-1.34116	4.15052e-10	0.61	0.377	-0.233	2.21885e-08	2.21885e-08	FALSE	0.999991	TRUE	yes	yes	TRUE	0
uc001atu.2	chr1:12227060..12269276,+	BRCA_ctrl	BRCA_cancer	TNFRSF1B	19.5999	11.1068	-0.827168	4.23434e-20	6.41208	5.12161	-0.32412	0.0107413	0.335	0.503	0.168	3.8178e-08	2.21885e-08	FALSE	0.995015	TRUE	no	no	TRUE	0
uc001aer.3	chr1:1270659..1284492,-	BRCA_ctrl	BRCA_cancer	DVL1	14.4126	19.5791	0.374684	3.20019e-06	10.5617	10.8697	0.0417491	0.67327	0.731	0.581	-0.151	3.49815e-16	1.32315e-16	FALSE	1	TRUE	no	yes	TRUE	0
uc002quu.2	chr1:1270659..1284492,-	BRCA_ctrl	BRCA_cancer	DVL1	14.4126	19.5791	0.374684	3.20019e-06	3.34411	8.06795	1.27037	1.35878e-31	0.235	0.39	0.155	1.32315e-16	1.32315e-16	FALSE	0.999994	TRUE	no	yes	TRUE	0
uc001afp.2	chr1:1353802..1356650,-	BRCA_ctrl	BRCA_cancer	LOC441869	10.0096	4.20665	-1.24384	2.54944e-31	3.75877	2.00274	-0.90783	6.59414e-06	0.424	0.601	0.176	7.5431e-05	6.41121e-05	NA	0.213849	FALSE	NA	NA	TRUE	0
uc001afq.2	chr1:1353802..1356650,-	BRCA_ctrl	BRCA_cancer	LOC441869	10.0096	4.20665	-1.24384	2.54944e-31	5.8813	1.97999	-1.57	6.47636e-07	0.544	0.354	-0.19	6.41121e-05	6.41121e-05	FALSE	0.900724	TRUE	no	no	TRUE	0
uc001elk.1	chr1:144676873..145076079,-	BRCA_ctrl	BRCA_cancer	PDE4DIP	60.2489	35.1867	-0.976831	2.32396e-33	8.74944	0.0206609	-8.54855	1.99296e-12	0.003	0	-0.003	1	5.91315e-15	FALSE	0.995685	TRUE	no	yes	NA	0
uc001eln.3	chr1:144676873..145076079,-	BRCA_ctrl	BRCA_cancer	PDE4DIP	60.2489	35.1867	-0.976831	2.32396e-33	3.83345	2.89113	-0.405921	0.00148348	0.102	0.083	-0.019	1	5.91315e-15	FALSE	0.998888	TRUE	no	yes	NA	0
uc001elv.3	chr1:144676873..145076079,-	BRCA_ctrl	BRCA_cancer	PDE4DIP	60.2489	35.1867	-0.976831	2.32396e-33	5.69215	1.27964	-2.15205	4.14335e-140	0.069	0.04	-0.029	1	5.91315e-15	FALSE	1	TRUE	no	yes	NA	0
uc001elw.3	chr1:144676873..145076079,-	BRCA_ctrl	BRCA_cancer	PDE4DIP	60.2489	35.1867	-0.976831	2.32396e-33	5.98426	0.0270941	-7.77323	5.14279e-13	0.002	0	-0.002	1	5.91315e-15	FALSE	1	TRUE	no	yes	NA	0
uc001elx.3	chr1:144676873..145076079,-	BRCA_ctrl	BRCA_cancer	PDE4DIP	60.2489	35.1867	-0.976831	2.32396e-33	5.50208	1.52844	-1.84741	7.93264e-59	0.09	0.043	-0.047	1	5.91315e-15	FALSE	1	TRUE	no	yes	NA	0
uc001emb.1	chr1:144676873..145076079,-	BRCA_ctrl	BRCA_cancer	PDE4DIP	60.2489	35.1867	-0.976831	2.32396e-33	7.61328	6.97339	-0.126558	0.28372	0.216	0.192	-0.025	1	5.91315e-15	FALSE	1	TRUE	no	no	NA	0
uc001eme.1	chr1:144676873..145076079,-	BRCA_ctrl	BRCA_cancer	PDE4DIP	60.2489	35.1867	-0.976831	2.32396e-33	2.69833	1.48265	-0.861443	1.24529e-11	0.066	0.042	-0.024	1	5.91315e-15	FALSE	0.999296	TRUE	no	no	NA	0
uc001emf.1	chr1:144676873..145076079,-	BRCA_ctrl	BRCA_cancer	PDE4DIP	60.2489	35.1867	-0.976831	2.32396e-33	12.6371	19.1199	0.597526	9.4822e-13	0.389	0.546	0.157	5.91315e-15	5.91315e-15	FALSE	1	TRUE	no	no	NA	0
uc001emg.1	chr1:144676873..145076079,-	BRCA_ctrl	BRCA_cancer	PDE4DIP	60.2489	35.1867	-0.976831	2.32396e-33	4.45879	0.313582	-3.82169	2.55524e-38	0.004	0.007	0.003	1	5.91315e-15	FALSE	0.995252	TRUE	no	yes	NA	0
uc001emh.2	chr1:144676873..145076079,-	BRCA_ctrl	BRCA_cancer	PDE4DIP	60.2489	35.1867	-0.976831	2.32396e-33	1.61219	1.10982	-0.537845	0.000153278	0.047	0.033	-0.014	1	5.91315e-15	FALSE	0.999702	TRUE	no	yes	NA	0
uc001emn.3	chr1:145209111..145295525,+	BRCA_ctrl	BRCA_cancer	NOTCH2NL	12.3067	17.8965	0.343628	2.60673e-05	3.98032	4.51244	0.180934	0.0851039	0.323	0.259	-0.065	1	3.3633e-06	FALSE	0.979052	TRUE	no	yes	NA	0
uc001emo.2	chr1:145209111..145295525,+	BRCA_ctrl	BRCA_cancer	NOTCH2NL	12.3067	17.8965	0.343628	2.60673e-05	3.72829	3.53474	-0.0766251	0.510696	0.302	0.231	-0.071	1	3.3633e-06	FALSE	0.978113	TRUE	no	yes	NA	0
uc010oyh.1	chr1:145209111..145295525,+	BRCA_ctrl	BRCA_cancer	NOTCH2NL	12.3067	17.8965	0.343628	2.60673e-05	4.3394	9.7648	1.16983	3.56777e-20	0.354	0.503	0.149	3.3633e-06	3.3633e-06	NA	0.987766	TRUE	NA	NA	NA	0
uc001euq.2	chr1:150459920..150479747,+	BRCA_ctrl	BRCA_cancer	TARS2	10.1345	19.3481	0.93708	5.03042e-50	6.65004	14.2374	1.09835	2.41233e-47	0.652	0.727	0.074	1	9.52857e-15	FALSE	1	TRUE	no	yes	NA	0
uc001eur.2	chr1:150459920..150479747,+	BRCA_ctrl	BRCA_cancer	TARS2	10.1345	19.3481	0.93708	5.03042e-50	3.33598	4.06198	0.284705	0.00147271	0.331	0.215	-0.116	9.52857e-15	9.52857e-15	FALSE	1	TRUE	no	yes	NA	0
uc001evc.2	chr1:150594604..150602098,-	BRCA_ctrl	BRCA_cancer	ENSA	112.524	208.367	0.680603	4.65074e-30	0.829142	12.3392	3.89086	1.84201e-42	0.007	0.052	0.045	1	5.12624e-16	FALSE	0.642808	TRUE	no	yes	NA	0
uc001evd.2	chr1:150594604..150602098,-	BRCA_ctrl	BRCA_cancer	ENSA	112.524	208.367	0.680603	4.65074e-30	0.575867	1.71074	1.56786	2.14173e-13	0.005	0.009	0.003	1	5.12624e-16	FALSE	0.875219	TRUE	no	yes	NA	0
uc001eve.2	chr1:150594604..150602098,-	BRCA_ctrl	BRCA_cancer	ENSA	112.524	208.367	0.680603	4.65074e-30	77.2483	158.725	1.03892	1.45576e-48	0.687	0.755	0.068	1	5.12624e-16	FALSE	0.891092	TRUE	no	yes	NA	0
uc001evf.2	chr1:150594604..150602098,-	BRCA_ctrl	BRCA_cancer	ENSA	112.524	208.367	0.680603	4.65074e-30	1.84019	5.16706	1.48897	3.58829e-07	0.016	0.026	0.009	1	5.12624e-16	FALSE	0.655811	TRUE	no	yes	NA	0
uc001evh.2	chr1:150594604..150602098,-	BRCA_ctrl	BRCA_cancer	ENSA	112.524	208.367	0.680603	4.65074e-30	26.1409	20.0234	-0.384538	2.20149e-05	0.232	0.107	-0.125	5.12624e-16	5.12624e-16	FALSE	0.822767	TRUE	no	yes	NA	0
uc001evi.2	chr1:150594604..150602098,-	BRCA_ctrl	BRCA_cancer	ENSA	112.524	208.367	0.680603	4.65074e-30	5.22928	9.19392	0.814043	1.25007e-19	0.047	0.046	-0.001	1	5.12624e-16	FALSE	0.539029	TRUE	no	no	NA	0
uc001evr.1	chr1:150782186..150849186,-	BRCA_ctrl	BRCA_cancer	ARNT	21.6909	17.2956	-0.36564	2.02701e-13	14.6688	7.66764	-0.935804	7.56588e-16	0.657	0.435	-0.223	1.78614e-13	6.91016e-15	FALSE	1	TRUE	no	yes	FALSE	0
uc001evs.1	chr1:150782186..150849186,-	BRCA_ctrl	BRCA_cancer	ARNT	21.6909	17.2956	-0.36564	2.02701e-13	1.80368	4.24476	1.23426	5.66626e-18	0.09	0.24	0.15	6.91016e-15	6.91016e-15	FALSE	1	TRUE	no	yes	FALSE	0
uc010pck.1	chr1:150782186..150849186,-	BRCA_ctrl	BRCA_cancer	ARNT	21.6909	17.2956	-0.36564	2.02701e-13	4.01392	4.43791	0.144689	0.247167	0.198	0.275	0.076	1	6.91016e-15	FALSE	0.987487	TRUE	no	no	FALSE	0
uc001ewd.2	chr1:150969302..150980854,-	BRCA_ctrl	BRCA_cancer	FAM63A	14.6781	21.8167	0.538044	3.48089e-09	4.35577	4.5105	0.0505717	0.734798	0.295	0.222	-0.073	1	4.39776e-12	FALSE	0.999876	TRUE	no	yes	FALSE	0
uc001ewg.2	chr1:150969302..150980854,-	BRCA_ctrl	BRCA_cancer	FAM63A	14.6781	21.8167	0.538044	3.48089e-09	8.67699	9.98562	0.202701	0.136517	0.589	0.45	-0.139	1	4.39776e-12	FALSE	0.999998	TRUE	no	yes	FALSE	0
uc010pcn.1	chr1:150969302..150980854,-	BRCA_ctrl	BRCA_cancer	FAM63A	14.6781	21.8167	0.538044	3.48089e-09	0.977575	5.27657	2.43132	8.58595e-38	0.071	0.234	0.164	4.39776e-12	4.39776e-12	FALSE	0.999999	TRUE	no	yes	FALSE	0
uc001ezj.1	chr1:151846060..151882113,-	BRCA_ctrl	BRCA_cancer	THEM4	7.59233	8.70847	0.173887	0.0086126	3.26284	5.19221	0.669913	1.10217e-12	0.42	0.578	0.158	1.11049e-11	1.11049e-11	FALSE	0.936028	TRUE	no	yes	TRUE	0
uc001ezk.1	chr1:151846060..151882113,-	BRCA_ctrl	BRCA_cancer	THEM4	7.59233	8.70847	0.173887	0.0086126	4.32949	3.51626	-0.299823	0.000219129	0.58	0.422	-0.158	1.11049e-11	1.11049e-11	NA	0.426241	TRUE	NA	NA	TRUE	0
uc001fcc.2	chr1:153579367..153585514,-	BRCA_ctrl	BRCA_cancer	S100A16	102.175	216.632	1.07875	2.95137e-20	42.3847	46.0408	0.119352	0.222418	0.421	0.289	-0.132	7.54408e-07	7.54408e-07	FALSE	0.978176	TRUE	no	yes	FALSE	0
uc001fcd.1	chr1:153579367..153585514,-	BRCA_ctrl	BRCA_cancer	S100A16	102.175	216.632	1.07875	2.95137e-20	59.7905	170.592	1.51252	6.38484e-25	0.579	0.711	0.132	7.54408e-07	7.54408e-07	FALSE	0.978202	TRUE	no	yes	FALSE	0
uc001fcf.3	chr1:153591280..153606568,-	BRCA_ctrl	BRCA_cancer	S100A13	144.102	168.918	0.233996	0.0125141	7.38858	3.68621	-1.00278	0.000487174	0.049	0.021	-0.029	1	2.76781e-08	FALSE	0.934731	TRUE	no	yes	NA	0
uc001fcg.2	chr1:153591280..153606568,-	BRCA_ctrl	BRCA_cancer	S100A13	144.102	168.918	0.233996	0.0125141	14.8564	8.22299	-0.853189	1.02859e-10	0.096	0.051	-0.045	1	2.76781e-08	FALSE	0.934613	TRUE	no	yes	NA	0
uc001fch.2	chr1:153591280..153606568,-	BRCA_ctrl	BRCA_cancer	S100A13	144.102	168.918	0.233996	0.0125141	107.85	142.312	0.400045	6.22152e-05	0.738	0.846	0.107	2.76781e-08	2.76781e-08	FALSE	0.934505	TRUE	no	yes	NA	0
uc001fci.2	chr1:153591280..153606568,-	BRCA_ctrl	BRCA_cancer	S100A13	144.102	168.918	0.233996	0.0125141	12.1021	12.8198	0.0828715	0.720449	0.101	0.068	-0.034	1	2.76781e-08	FALSE	0.934229	TRUE	no	no	NA	0
uc001fcj.2	chr1:153591280..153606568,-	BRCA_ctrl	BRCA_cancer	S100A13	144.102	168.918	0.233996	0.0125141	1.82561	1.65521	-0.140793	0.174049	0.014	0.014	0	1	2.76781e-08	FALSE	0.933442	TRUE	no	yes	NA	0
uc001fez.1	chr1:154377669..154440188,+	BRCA_ctrl	BRCA_cancer	IL6R	4.61896	2.15376	-1.10237	5.12982e-25	4.30358	1.87395	-1.19912	7.31087e-14	0.932	0.772	-0.161	1.57277e-05	1.57277e-05	FALSE	0.999989	TRUE	yes	yes	NA	0
uc001avw.3	chr1:15479028..15546973,+	BRCA_ctrl	BRCA_cancer	TMEM51	5.57134	8.52229	0.605134	6.53416e-16	1.16007	1.33837	0.206051	0.523245	0.19	0.147	-0.043	1	0.000473241	FALSE	0.99897	TRUE	no	yes	FALSE	0
uc001avx.2	chr1:15479028..15546973,+	BRCA_ctrl	BRCA_cancer	TMEM51	5.57134	8.52229	0.605134	6.53416e-16	1.89552	4.41199	1.2182	2.41573e-15	0.352	0.52	0.167	0.000473241	0.000473241	FALSE	0.998977	TRUE	no	yes	FALSE	0
uc010obk.1	chr1:15479028..15546973,+	BRCA_ctrl	BRCA_cancer	TMEM51	5.57134	8.52229	0.605134	6.53416e-16	2.16288	2.10689	-0.0379468	0.922177	0.376	0.262	-0.115	1	0.000473241	FALSE	0.998975	TRUE	no	yes	FALSE	0
uc001fgr.1	chr1:155023422..155035252,+	BRCA_ctrl	BRCA_cancer	ADAM15	51.4194	86.5541	0.738747	7.46328e-19	3.1147	16.6053	2.41405	4.68245e-50	0.064	0.189	0.126	6.10929e-15	5.46213e-17	FALSE	1	TRUE	yes	yes	FALSE	0
uc001fgt.1	chr1:155023422..155035252,+	BRCA_ctrl	BRCA_cancer	ADAM15	51.4194	86.5541	0.738747	7.46328e-19	4.23172	16.0664	1.92452	4.11592e-51	0.087	0.188	0.101	1	5.46213e-17	FALSE	1	TRUE	yes	yes	FALSE	0
uc001fgu.1	chr1:155023422..155035252,+	BRCA_ctrl	BRCA_cancer	ADAM15	51.4194	86.5541	0.738747	7.46328e-19	2.41607	11.0958	2.19889	2.64468e-39	0.048	0.113	0.064	1	5.46213e-17	FALSE	1	TRUE	yes	yes	FALSE	0
uc001fgv.1	chr1:155023422..155035252,+	BRCA_ctrl	BRCA_cancer	ADAM15	51.4194	86.5541	0.738747	7.46328e-19	2.79591	5.13307	0.876339	7.99042e-12	0.055	0.059	0.004	1	5.46213e-17	FALSE	1	TRUE	yes	yes	FALSE	0
uc001fgw.1	chr1:155023422..155035252,+	BRCA_ctrl	BRCA_cancer	ADAM15	51.4194	86.5541	0.738747	7.46328e-19	28.7992	21.8064	-0.401252	2.11548e-05	0.551	0.273	-0.278	5.46213e-17	5.46213e-17	FALSE	1	TRUE	yes	yes	FALSE	0
uc001fgx.1	chr1:155023422..155035252,+	BRCA_ctrl	BRCA_cancer	ADAM15	51.4194	86.5541	0.738747	7.46328e-19	4.17455	3.81088	-0.131459	0.904674	0.076	0.047	-0.029	1	5.46213e-17	FALSE	1	TRUE	yes	yes	FALSE	0
uc001fhb.1	chr1:155023422..155035252,+	BRCA_ctrl	BRCA_cancer	ADAM15	51.4194	86.5541	0.738747	7.46328e-19	0.54369	5.45547	3.32277	2.45881e-25	0.009	0.044	0.035	1	5.46213e-17	FALSE	0.298536	FALSE	no	no	FALSE	0
uc010pet.1	chr1:155023422..155035252,+	BRCA_ctrl	BRCA_cancer	ADAM15	51.4194	86.5541	0.738747	7.46328e-19	1.13807	1.37422	0.272158	0.0266107	0.024	0.018	-0.006	1	5.46213e-17	FALSE	1	TRUE	yes	yes	FALSE	0
uc010peu.1	chr1:155023422..155035252,+	BRCA_ctrl	BRCA_cancer	ADAM15	51.4194	86.5541	0.738747	7.46328e-19	1.65263	1.83392	0.150328	0.203378	0.035	0.025	-0.01	1	5.46213e-17	FALSE	1	TRUE	yes	yes	FALSE	1
uc001fkj.2	chr1:155290640..155300909,+	BRCA_ctrl	BRCA_cancer	RUSC1	12.4673	34.6408	1.38307	1.91677e-91	1.40634	0.970923	-0.534146	0.0198612	0.116	0.03	-0.086	1	7.97086e-10	FALSE	1	TRUE	no	yes	NA	0
uc001fkn.2	chr1:155290640..155300909,+	BRCA_ctrl	BRCA_cancer	RUSC1	12.4673	34.6408	1.38307	1.91677e-91	1.71438	5.96163	1.79727	9.4284e-35	0.133	0.168	0.035	1	7.97086e-10	FALSE	0.922472	TRUE	no	yes	NA	0
uc001fko.2	chr1:155290640..155300909,+	BRCA_ctrl	BRCA_cancer	RUSC1	12.4673	34.6408	1.38307	1.91677e-91	0.199292	1.37869	2.78297	3.08649e-11	0.016	0.038	0.023	1	7.97086e-10	NA	0.396167	TRUE	NA	NA	NA	0
uc001fkp.2	chr1:155290640..155300909,+	BRCA_ctrl	BRCA_cancer	RUSC1	12.4673	34.6408	1.38307	1.91677e-91	2.34709	10.4133	2.14912	2.5426e-71	0.185	0.304	0.119	7.97086e-10	7.97086e-10	FALSE	0.999989	TRUE	no	yes	NA	0
uc001fkq.2	chr1:155290640..155300909,+	BRCA_ctrl	BRCA_cancer	RUSC1	12.4673	34.6408	1.38307	1.91677e-91	0.553398	2.02327	1.86724	1.68654e-10	0.043	0.056	0.013	1	7.97086e-10	FALSE	0.999587	TRUE	no	yes	NA	0
uc001fkr.2	chr1:155290640..155300909,+	BRCA_ctrl	BRCA_cancer	RUSC1	12.4673	34.6408	1.38307	1.91677e-91	1.44584	4.3716	1.59522	4.61471e-50	0.115	0.124	0.009	1	7.97086e-10	FALSE	0.999989	TRUE	no	yes	NA	1
uc001fks.2	chr1:155290640..155300909,+	BRCA_ctrl	BRCA_cancer	RUSC1	12.4673	34.6408	1.38307	1.91677e-91	2.73552	5.61683	1.03703	5.85516e-16	0.224	0.165	-0.059	1	7.97086e-10	FALSE	0.704803	TRUE	no	yes	NA	0
uc001flh.2	chr1:155629234..155658791,-	BRCA_ctrl	BRCA_cancer	YY1AP1	37.0397	49.5957	0.414354	1.23721e-19	0.603982	1.2268	1.02124	0.0032119	0.016	0.025	0.009	1	2.23699e-05	FALSE	1	TRUE	no	no	NA	0
uc001fli.2	chr1:155629234..155658791,-	BRCA_ctrl	BRCA_cancer	YY1AP1	37.0397	49.5957	0.414354	1.23721e-19	0.660823	2.12449	1.68345	0.000951705	0.017	0.041	0.024	1	2.23699e-05	FALSE	1	TRUE	no	no	NA	0
uc001flj.2	chr1:155629234..155658791,-	BRCA_ctrl	BRCA_cancer	YY1AP1	37.0397	49.5957	0.414354	1.23721e-19	3.82853	7.19668	0.910409	0.0402024	0.102	0.139	0.037	1	2.23699e-05	FALSE	1	TRUE	no	no	NA	0
uc001fll.2	chr1:155629234..155658791,-	BRCA_ctrl	BRCA_cancer	YY1AP1	37.0397	49.5957	0.414354	1.23721e-19	0.395575	1.17576	1.5694	0.000761692	0.011	0.023	0.012	1	2.23699e-05	FALSE	1	TRUE	no	no	NA	0
uc001flm.2	chr1:155629234..155658791,-	BRCA_ctrl	BRCA_cancer	YY1AP1	37.0397	49.5957	0.414354	1.23721e-19	0.986442	1.60987	0.705942	0.000883206	0.026	0.032	0.006	1	2.23699e-05	FALSE	1	TRUE	no	no	NA	0
uc001fln.2	chr1:155629234..155658791,-	BRCA_ctrl	BRCA_cancer	YY1AP1	37.0397	49.5957	0.414354	1.23721e-19	11.6369	7.33052	-0.666652	0.00947734	0.316	0.153	-0.163	2.23699e-05	2.23699e-05	FALSE	1	TRUE	no	no	NA	0
uc001flp.2	chr1:155629234..155658791,-	BRCA_ctrl	BRCA_cancer	YY1AP1	37.0397	49.5957	0.414354	1.23721e-19	7.31917	10.6323	0.538724	1.14103e-09	0.198	0.214	0.016	1	2.23699e-05	FALSE	1	TRUE	no	no	NA	0
uc009wqx.2	chr1:155629234..155658791,-	BRCA_ctrl	BRCA_cancer	YY1AP1	37.0397	49.5957	0.414354	1.23721e-19	1.77522	1.8199	0.0362727	0.761787	0.048	0.036	-0.011	1	2.23699e-05	FALSE	0.999996	TRUE	no	no	NA	0
uc010pgg.1	chr1:155629234..155658791,-	BRCA_ctrl	BRCA_cancer	YY1AP1	37.0397	49.5957	0.414354	1.23721e-19	5.0969	10.6095	1.05735	3.65827e-20	0.139	0.217	0.079	1	2.23699e-05	FALSE	1	TRUE	no	no	NA	0
uc010pgh.1	chr1:155629234..155658791,-	BRCA_ctrl	BRCA_cancer	YY1AP1	37.0397	49.5957	0.414354	1.23721e-19	1.89473	1.78552	-0.0857735	0.560969	0.051	0.037	-0.014	1	2.23699e-05	FALSE	1	TRUE	no	no	NA	0
uc010pgj.1	chr1:155629234..155658791,-	BRCA_ctrl	BRCA_cancer	YY1AP1	37.0397	49.5957	0.414354	1.23721e-19	0.982611	1.09839	0.162599	0.0796421	0.026	0.022	-0.004	1	2.23699e-05	FALSE	0.999985	TRUE	no	no	NA	0
uc001fqj.1	chr1:156863523..156886226,+	BRCA_ctrl	BRCA_cancer	PEAR1	6.51778	1.46378	-2.16493	3.53853e-144	3.92367	0.742988	-2.40001	2.65476e-53	0.57	0.422	-0.148	0.00127156	0.00127156	FALSE	1	TRUE	yes	yes	TRUE	0
uc001fqk.1	chr1:156863523..156886226,+	BRCA_ctrl	BRCA_cancer	PEAR1	6.51778	1.46378	-2.16493	3.53853e-144	2.59411	0.719969	-1.84869	8.77369e-82	0.43	0.577	0.147	0.00145446	0.00127156	FALSE	1	TRUE	no	yes	TRUE	1
uc001gar.2	chr1:161511553..161520413,-	BRCA_ctrl	BRCA_cancer	FCGR3A	19.9954	42.9812	1.1022	1.79311e-20	0.636265	1.28012	1.00752	0.000130528	0.033	0.026	-0.007	1	0.000299936	FALSE	0.986051	TRUE	no	yes	FALSE	0
uc001gat.3	chr1:161511553..161520413,-	BRCA_ctrl	BRCA_cancer	FCGR3A	19.9954	42.9812	1.1022	1.79311e-20	10.1122	26.1283	1.36943	1.17938e-10	0.46	0.588	0.128	0.000299936	0.000299936	FALSE	0.9814	TRUE	yes	yes	FALSE	0
uc009wuh.2	chr1:161511553..161520413,-	BRCA_ctrl	BRCA_cancer	FCGR3A	19.9954	42.9812	1.1022	1.79311e-20	1.96713	4.99027	1.34256	0.00109737	0.131	0.151	0.02	1	0.000299936	FALSE	0.980341	TRUE	yes	yes	FALSE	0
uc009wui.2	chr1:161511553..161520413,-	BRCA_ctrl	BRCA_cancer	FCGR3A	19.9954	42.9812	1.1022	1.79311e-20	7.1346	10.3382	0.535022	0.0201484	0.369	0.229	-0.14	1	0.000299936	FALSE	0.98138	TRUE	yes	yes	FALSE	0
uc001axo.2	chr1:16340523..16346089,-	BRCA_ctrl	BRCA_cancer	HSPB7	54.4811	1.40555	-5.28448	0	19.9824	0.352974	-5.81995	1.30043e-102	0.347	0.17	-0.177	1.67812e-09	1.67812e-09	FALSE	0.992476	TRUE	no	yes	NA	0
uc001axr.2	chr1:16340523..16346089,-	BRCA_ctrl	BRCA_cancer	HSPB7	54.4811	1.40555	-5.28448	0	4.16048	0.0593044	-6.11455	5.70644e-30	0.051	0.03	-0.021	1	1.67812e-09	FALSE	0.995015	TRUE	no	yes	NA	0
uc001axs.2	chr1:16340523..16346089,-	BRCA_ctrl	BRCA_cancer	HSPB7	54.4811	1.40555	-5.28448	0	29.279	0.802056	-5.18866	0	0.538	0.525	-0.013	1	1.67812e-09	FALSE	0.995164	TRUE	no	yes	NA	0
uc001gcs.2	chr1:164528802..164854300,+	BRCA_ctrl	BRCA_cancer	PBX1	33.6931	53.9934	0.685791	6.70367e-11	20.0381	22.7725	0.18454	0.0542884	0.598	0.473	-0.125	2.23614e-13	2.23614e-13	FALSE	0.999717	TRUE	no	yes	NA	0
uc001gct.2	chr1:164528802..164854300,+	BRCA_ctrl	BRCA_cancer	PBX1	33.6931	53.9934	0.685791	6.70367e-11	4.35388	15.097	1.79382	2.05765e-05	0.127	0.225	0.098	1	2.23614e-13	FALSE	0.999966	TRUE	no	yes	NA	0
uc010pkv.1	chr1:164528802..164854300,+	BRCA_ctrl	BRCA_cancer	PBX1	33.6931	53.9934	0.685791	6.70367e-11	8.63273	15.1239	0.808918	0.00359995	0.255	0.281	0.026	1	2.23614e-13	FALSE	0.999528	TRUE	no	yes	NA	0
uc001ggh.2	chr1:169558090..169599377,-	BRCA_ctrl	BRCA_cancer	SELP	9.09319	2.4955	-1.86607	9.07053e-38	3.50921	1.02003	-1.78187	5.22666e-35	0.401	0.492	0.091	1	0.000123307	FALSE	1	TRUE	no	yes	NA	0
uc001ggi.3	chr1:169558090..169599377,-	BRCA_ctrl	BRCA_cancer	SELP	9.09319	2.4955	-1.86607	9.07053e-38	5.40356	1.41849	-1.92905	9.9264e-19	0.584	0.433	-0.151	0.000123307	0.000123307	FALSE	1	TRUE	no	yes	NA	0
uc001gha.2	chr1:170501263..170522974,+	BRCA_ctrl	BRCA_cancer	GORAB	4.42418	6.09812	0.464355	1.30578e-13	1.80876	3.43103	0.923383	2.40987e-17	0.431	0.564	0.133	5.53783e-09	5.53783e-09	FALSE	0.999907	TRUE	yes	no	NA	0
uc009wvx.2	chr1:170501263..170522974,+	BRCA_ctrl	BRCA_cancer	GORAB	4.42418	6.09812	0.464355	1.30578e-13	1.33418	1.42849	0.0983725	0.665461	0.288	0.229	-0.059	1	5.53783e-09	FALSE	0.975731	TRUE	no	no	NA	0
uc001ghl.2	chr1:171217633..171255111,+	BRCA_ctrl	BRCA_cancer	FMO1	6.72245	3.77919	-0.844764	1.0165e-09	1.04263	0.780266	-0.417665	0.291781	0.157	0.225	0.068	1	0.00741585	FALSE	0.999998	TRUE	no	no	NA	0
uc001ghm.2	chr1:171217633..171255111,+	BRCA_ctrl	BRCA_cancer	FMO1	6.72245	3.77919	-0.844764	1.0165e-09	3.88333	1.5993	-1.27939	9.81075e-07	0.56	0.36	-0.2	0.00741585	0.00741585	FALSE	0.999998	TRUE	no	yes	NA	0
uc001ghn.2	chr1:171217633..171255111,+	BRCA_ctrl	BRCA_cancer	FMO1	6.72245	3.77919	-0.844764	1.0165e-09	1.23498	0.5458	-1.17655	4.34896e-09	0.186	0.192	0.006	1	0.00741585	FALSE	0.999924	TRUE	no	yes	NA	0
uc001azw.2	chr1:17301000..17308081,-	BRCA_ctrl	BRCA_cancer	MFAP2	9.56608	50.2416	2.39836	3.26767e-63	6.42599	42.9356	2.73976	8.7139e-35	0.555	0.821	0.266	0.00345342	0.00345342	FALSE	0.977046	TRUE	yes	yes	FALSE	0
uc001azx.2	chr1:17301000..17308081,-	BRCA_ctrl	BRCA_cancer	MFAP2	9.56608	50.2416	2.39836	3.26767e-63	0.691195	5.93121	3.09675	6.18293e-20	0.059	0.105	0.046	1	0.00345342	FALSE	0.972957	TRUE	yes	yes	FALSE	0
uc001azy.2	chr1:17301000..17308081,-	BRCA_ctrl	BRCA_cancer	MFAP2	9.56608	50.2416	2.39836	3.26767e-63	1.82501	1.08728	-0.746372	0.172446	0.269	0.05	-0.219	1	0.00345342	FALSE	0.977072	TRUE	yes	yes	FALSE	0
uc001gje.3	chr1:173768690..173794026,-	BRCA_ctrl	BRCA_cancer	CENPL	1.87265	5.01989	1.39709	3.96691e-66	0.442133	1.65859	1.90386	2.40606e-33	0.233	0.308	0.076	1	1.99795e-09	FALSE	0.994666	TRUE	no	yes	NA	0
uc001gjf.3	chr1:173768690..173794026,-	BRCA_ctrl	BRCA_cancer	CENPL	1.87265	5.01989	1.39709	3.96691e-66	1.04671	1.92546	0.879428	2.64376e-14	0.553	0.397	-0.156	1.99795e-09	1.99795e-09	FALSE	0.994558	TRUE	no	yes	NA	0
uc001gju.3	chr1:173900354..173962210,-	BRCA_ctrl	BRCA_cancer	RC3H1	5.05636	3.94546	-0.361463	3.71556e-12	1.71245	1.9857	0.21359	0.321527	0.34	0.492	0.152	7.08046e-06	5.93804e-06	FALSE	1	TRUE	no	yes	FALSE	0
uc010pms.1	chr1:173900354..173962210,-	BRCA_ctrl	BRCA_cancer	RC3H1	5.05636	3.94546	-0.361463	3.71556e-12	3.23997	1.86152	-0.799407	8.09318e-08	0.642	0.487	-0.155	5.93804e-06	5.93804e-06	FALSE	1	TRUE	no	yes	FALSE	0
uc001gjx.2	chr1:174128634..174959724,+	BRCA_ctrl	BRCA_cancer	RABGAP1L	8.72814	8.61687	-0.279864	3.90895e-05	3.83132	2.22677	-0.782213	8.01872e-23	0.436	0.286	-0.151	2.99497e-08	2.99497e-08	FALSE	1	TRUE	no	yes	NA	0
uc001gkg.2	chr1:174128634..174959724,+	BRCA_ctrl	BRCA_cancer	RABGAP1L	8.72814	8.61687	-0.279864	3.90895e-05	1.02233	1.36941	0.418441	0.0350358	0.12	0.142	0.022	1	2.99497e-08	FALSE	0.568635	TRUE	no	no	NA	0
uc001gkh.3	chr1:174128634..174959724,+	BRCA_ctrl	BRCA_cancer	RABGAP1L	8.72814	8.61687	-0.279864	3.90895e-05	1.40323	2.19743	0.646242	0.0042396	0.158	0.222	0.064	1	2.99497e-08	FALSE	0.999653	TRUE	no	no	NA	0
uc001goq.1	chr1:181003139..181024633,+	BRCA_ctrl	BRCA_cancer	MR1	8.85657	11.2189	0.3804	3.12243e-06	2.5935	4.55357	0.811279	4.05748e-17	0.289	0.405	0.115	3.87376e-14	3.87376e-14	FALSE	0.999629	TRUE	yes	yes	TRUE	0
uc001gos.1	chr1:181003139..181024633,+	BRCA_ctrl	BRCA_cancer	MR1	8.85657	11.2189	0.3804	3.12243e-06	6.01364	6.4513	0.101654	0.298329	0.681	0.574	-0.107	8.8356e-14	3.87376e-14	FALSE	0.995152	TRUE	yes	yes	TRUE	0
uc001grg.3	chr1:185126192..185260912,+	BRCA_ctrl	BRCA_cancer	C1orf26	2.61555	2.26061	-0.207712	0.000734787	2.24476	1.66473	-0.431174	0.000420003	0.868	0.76	-0.108	0.000109907	0.000109907	FALSE	1	TRUE	no	yes	NA	NA
uc001gsb.2	chr1:186640945..186649559,-	BRCA_ctrl	BRCA_cancer	PTGS2	5.66471	1.72102	-1.72504	1.461e-19	5.19754	1.26383	-2.03961	2.67878e-13	0.901	0.596	-0.305	6.2418e-05	6.2418e-05	FALSE	1	TRUE	yes	yes	NA	0
uc001gsc.2	chr1:186798032..186958105,+	BRCA_ctrl	BRCA_cancer	PLA2G4A	6.72938	2.23341	-1.59857	2.80948e-28	6.0567	1.81797	-1.73571	5.57364e-21	0.885	0.701	-0.184	0.0085062	0.0085062	FALSE	1	TRUE	no	yes	NA	0
uc001gti.3	chr1:196621008..196716631,+	BRCA_ctrl	BRCA_cancer	CFH	51.8488	16.6192	-1.48661	2.78424e-60	19.6057	3.2482	-2.59308	6.62728e-78	0.362	0.178	-0.184	7.37763e-17	7.37763e-17	FALSE	0.999903	TRUE	yes	yes	TRUE	0
uc001gtj.3	chr1:196621008..196716631,+	BRCA_ctrl	BRCA_cancer	CFH	51.8488	16.6192	-1.48661	2.78424e-60	31.9392	12.9141	-1.30635	4.51076e-45	0.63	0.783	0.153	7.90473e-17	7.37763e-17	FALSE	1	TRUE	yes	yes	TRUE	0
uc001gvo.2	chr1:200860639..200884863,+	BRCA_ctrl	BRCA_cancer	C1orf106	1.80569	5.7673	1.67335	1.88666e-13	0.19931	1.67215	3.06503	8.64767e-16	0.211	0.445	0.234	0.000478184	0.000478184	FALSE	1	TRUE	no	yes	TRUE	0
uc010ppm.1	chr1:200860639..200884863,+	BRCA_ctrl	BRCA_cancer	C1orf106	1.80569	5.7673	1.67335	1.88666e-13	1.60638	4.09515	1.34978	0.000239476	0.789	0.555	-0.234	0.000478184	0.000478184	FALSE	1	TRUE	no	yes	TRUE	0
uc001gxu.2	chr1:202163118..202288888,+	BRCA_ctrl	BRCA_cancer	LGR6	8.63098	3.31012	-1.40807	5.90025e-13	6.13103	1.59195	-1.94487	8.90782e-07	0.587	0.227	-0.36	1.48283e-11	1.48283e-11	FALSE	1	TRUE	yes	yes	NA	0
uc001gxv.2	chr1:202163118..202288888,+	BRCA_ctrl	BRCA_cancer	LGR6	8.63098	3.31012	-1.40807	5.90025e-13	1.49607	0.869131	-0.783104	0.0131433	0.248	0.337	0.09	1	1.48283e-11	FALSE	1	TRUE	no	yes	NA	0
uc001bcu.2	chr1:20301925..20306932,-	BRCA_ctrl	BRCA_cancer	PLA2G2A	53.0098	17.6357	-1.5963	1.54443e-11	3.49378	0.994952	-1.80947	1.94687e-06	0.098	0.087	-0.01	1	0.000965704	FALSE	0.549823	TRUE	yes	yes	FALSE	0
uc010oda.1	chr1:20301925..20306932,-	BRCA_ctrl	BRCA_cancer	PLA2G2A	53.0098	17.6357	-1.5963	1.54443e-11	44.7267	13.6104	-1.71625	0.00965173	0.447	0.225	-0.222	0.00134958	0.000965704	FALSE	0.549131	TRUE	yes	yes	FALSE	0
uc010odb.1	chr1:20301925..20306932,-	BRCA_ctrl	BRCA_cancer	PLA2G2A	53.0098	17.6357	-1.5963	1.54443e-11	4.48173	2.87677	-0.639281	0.029067	0.452	0.669	0.217	0.000965704	0.000965704	FALSE	0.550334	TRUE	yes	yes	FALSE	0
uc001gze.1	chr1:203096836..203136533,+	BRCA_ctrl	BRCA_cancer	ADORA1	8.22733	7.88932	-0.045058	0.862505	1.5616	0.819063	-0.930211	0.00157185	0.188	0.105	-0.083	1	1.2321e-08	FALSE	0.999975	TRUE	no	yes	NA	0
uc001gzf.1	chr1:203096836..203136533,+	BRCA_ctrl	BRCA_cancer	ADORA1	8.22733	7.88932	-0.045058	0.862505	0.87808	2.06386	1.23214	1.10445e-05	0.104	0.254	0.15	1.2321e-08	1.2321e-08	FALSE	0.999975	TRUE	no	yes	NA	0
uc010pqg.1	chr1:203096836..203136533,+	BRCA_ctrl	BRCA_cancer	ADORA1	8.22733	7.88932	-0.045058	0.862505	2.02053	1.6618	-0.281633	0.120634	0.27	0.229	-0.04	1	1.2321e-08	FALSE	0.999334	TRUE	no	yes	NA	0
uc010pqh.1	chr1:203096836..203136533,+	BRCA_ctrl	BRCA_cancer	ADORA1	8.22733	7.88932	-0.045058	0.862505	3.69372	3.29127	-0.16643	0.466213	0.431	0.407	-0.024	1	1.2321e-08	FALSE	0.999988	TRUE	no	yes	NA	0
uc001hbj.2	chr1:204797782..204991949,+	BRCA_ctrl	BRCA_cancer	NFASC	6.68465	4.00711	-0.947543	8.60799e-11	1.97269	0.658149	-1.58332	1.01549e-12	0.272	0.128	-0.145	1.20854e-12	1.20854e-12	FALSE	1	TRUE	yes	yes	NA	0
uc001hbl.1	chr1:204797782..204991949,+	BRCA_ctrl	BRCA_cancer	NFASC	6.68465	4.00711	-0.947543	8.60799e-11	1.75411	1.23732	-0.503379	0.0281157	0.256	0.26	0.004	1	1.20854e-12	FALSE	0.999869	TRUE	no	yes	NA	0
uc001hdx.2	chr1:206516200..206637782,+	BRCA_ctrl	BRCA_cancer	SRGAP2	9.07716	10.1118	0.39342	3.22089e-09	4.02683	2.86044	-0.492984	7.64474e-16	0.435	0.294	-0.14	9.0064e-17	9.0064e-17	FALSE	1	TRUE	no	no	TRUE	0
uc001hdy.2	chr1:206516200..206637782,+	BRCA_ctrl	BRCA_cancer	SRGAP2	9.07716	10.1118	0.39342	3.22089e-09	1.38953	3.17272	1.19092	9.7972e-06	0.161	0.297	0.136	2.27809e-06	9.0064e-17	FALSE	1	TRUE	no	no	TRUE	0
uc010prt.1	chr1:206516200..206637782,+	BRCA_ctrl	BRCA_cancer	SRGAP2	9.07716	10.1118	0.39342	3.22089e-09	1.05669	0.546026	-0.951201	0.00840161	0.102	0.05	-0.052	1	9.0064e-17	FALSE	1	TRUE	no	yes	TRUE	0
uc010pru.1	chr1:206516200..206637782,+	BRCA_ctrl	BRCA_cancer	SRGAP2	9.07716	10.1118	0.39342	3.22089e-09	1.56245	2.6585	0.76666	0.025608	0.18	0.268	0.088	1	9.0064e-17	FALSE	1	TRUE	no	yes	TRUE	0
uc001hef.2	chr1:206680879..206762615,+	BRCA_ctrl	BRCA_cancer	RASSF5	6.86212	7.69421	0.158927	0.15147	5.09019	6.40477	0.331317	0.00628308	0.736	0.844	0.108	4.80026e-11	4.80026e-11	FALSE	0.999553	TRUE	no	yes	NA	0
uc001hey.2	chr1:207076633..207096592,-	BRCA_ctrl	BRCA_cancer	FAIM3	3.03492	6.2757	1.00795	9.22474e-14	2.25932	3.22898	0.515001	0.041889	0.715	0.495	-0.22	1.06115e-05	2.7832e-07	FALSE	0.99981	TRUE	yes	yes	TRUE	0
uc010prz.1	chr1:207076633..207096592,-	BRCA_ctrl	BRCA_cancer	FAIM3	3.03492	6.2757	1.00795	9.22474e-14	0.612513	2.82167	2.20196	3.24206e-22	0.216	0.451	0.235	2.7832e-07	2.7832e-07	FALSE	0.991358	TRUE	no	no	TRUE	0
uc001hgi.2	chr1:207925402..207968857,+	BRCA_ctrl	BRCA_cancer	CD46	92.4152	114.607	0.299926	7.85339e-05	22.8	11.1164	-1.03627	9.37571e-24	0.244	0.106	-0.138	1.25809e-16	1.25809e-16	FALSE	0.998957	TRUE	yes	yes	FALSE	0
uc001hgj.2	chr1:207925402..207968857,+	BRCA_ctrl	BRCA_cancer	CD46	92.4152	114.607	0.299926	7.85339e-05	0.870292	1.46106	0.747083	0.0170907	0.009	0.012	0.003	1	1.25809e-16	FALSE	0.999687	TRUE	yes	yes	FALSE	0
uc001hgl.2	chr1:207925402..207968857,+	BRCA_ctrl	BRCA_cancer	CD46	92.4152	114.607	0.299926	7.85339e-05	13.4181	4.83009	-1.4739	5.09262e-16	0.142	0.048	-0.094	1	1.25809e-16	FALSE	0.998709	TRUE	yes	yes	FALSE	0
uc001hgm.2	chr1:207925402..207968857,+	BRCA_ctrl	BRCA_cancer	CD46	92.4152	114.607	0.299926	7.85339e-05	35.2035	64.9165	0.88284	2.09905e-15	0.386	0.543	0.157	6.42057e-13	1.25809e-16	FALSE	0.999323	TRUE	yes	yes	FALSE	0
uc001hgp.2	chr1:207925402..207968857,+	BRCA_ctrl	BRCA_cancer	CD46	92.4152	114.607	0.299926	7.85339e-05	16.5147	28.2172	0.772815	2.4408e-08	0.178	0.242	0.065	1	1.25809e-16	FALSE	0.999279	TRUE	yes	yes	FALSE	0
uc001hgz.2	chr1:208195590..208417665,-	BRCA_ctrl	BRCA_cancer	PLXNA2	3.28527	3.00681	-0.23995	0.0140526	2.75407	2.06526	-0.415108	7.19173e-05	0.836	0.669	-0.167	9.92831e-12	9.92831e-12	FALSE	1	TRUE	yes	yes	NA	0
uc001hhg.2	chr1:209788220..209825820,-	BRCA_ctrl	BRCA_cancer	LAMB3	50.2729	15.8962	-1.64845	3.37902e-34	6.06981	2.45777	-1.30405	1.3592e-21	0.19	0.252	0.062	1	7.74327e-06	FALSE	1	TRUE	yes	yes	NA	0
uc001hhh.2	chr1:209788220..209825820,-	BRCA_ctrl	BRCA_cancer	LAMB3	50.2729	15.8962	-1.64845	3.37902e-34	42.8633	12.2511	-1.80679	9.16417e-20	0.769	0.605	-0.164	7.74327e-06	7.74327e-06	FALSE	1	TRUE	yes	yes	NA	0
uc001hhk.2	chr1:209859550..209908294,+	BRCA_ctrl	BRCA_cancer	HSD11B1	14.2787	1.92671	-2.88796	1.8194e-128	14.2445	1.82321	-2.96467	3.8152e-104	0.99	0.873	-0.117	8.48837e-07	8.48837e-07	FALSE	0.998517	TRUE	no	yes	NA	0
uc001hhz.3	chr1:210501606..210849631,+	BRCA_ctrl	BRCA_cancer	HHAT	4.27656	6.85312	0.631685	7.40951e-11	0.926248	1.63376	0.81833	0.000733876	0.209	0.229	0.02	1	8.09387e-08	FALSE	0.999998	TRUE	no	yes	TRUE	0
uc001hia.3	chr1:210501606..210849631,+	BRCA_ctrl	BRCA_cancer	HHAT	4.27656	6.85312	0.631685	7.40951e-11	1.52951	3.30615	1.11092	1.68573e-23	0.359	0.497	0.139	8.09387e-08	8.09387e-08	FALSE	0.879256	TRUE	no	yes	TRUE	0
uc009xcx.2	chr1:210501606..210849631,+	BRCA_ctrl	BRCA_cancer	HHAT	4.27656	6.85312	0.631685	7.40951e-11	1.21536	0.886973	-0.454172	0.137623	0.286	0.126	-0.159	1.07798e-05	8.09387e-08	FALSE	0.999998	TRUE	no	yes	TRUE	0
uc001hih.2	chr1:211499957..211548284,+	BRCA_ctrl	BRCA_cancer	TRAF5	6.13878	10.3073	0.741273	2.44305e-16	1.91423	1.63861	-0.224231	0.537758	0.319	0.203	-0.116	0.000619711	5.48144e-05	FALSE	0.999999	TRUE	no	yes	FALSE	0
uc001hii.2	chr1:211499957..211548284,+	BRCA_ctrl	BRCA_cancer	TRAF5	6.13878	10.3073	0.741273	2.44305e-16	1.8004	5.29119	1.5549	0.000130576	0.261	0.421	0.159	5.48144e-05	5.48144e-05	FALSE	0.999999	TRUE	no	yes	FALSE	0
uc001hij.2	chr1:211499957..211548284,+	BRCA_ctrl	BRCA_cancer	TRAF5	6.13878	10.3073	0.741273	2.44305e-16	1.76646	1.52096	-0.215818	0.587486	0.3	0.191	-0.108	0.000260731	5.48144e-05	FALSE	0.999999	TRUE	no	yes	FALSE	0
uc001bet.2	chr1:21835858..21904904,+	BRCA_ctrl	BRCA_cancer	ALPL	21.3629	8.78437	-1.30319	5.35608e-23	14.9755	4.78139	-1.64698	5.98534e-15	0.676	0.464	-0.212	2.48597e-05	2.48597e-05	FALSE	1	TRUE	yes	yes	FALSE	0
uc001beu.3	chr1:21835858..21904904,+	BRCA_ctrl	BRCA_cancer	ALPL	21.3629	8.78437	-1.30319	5.35608e-23	4.34532	1.85649	-1.22651	1.48122e-05	0.232	0.336	0.104	1	2.48597e-05	FALSE	1	TRUE	yes	yes	FALSE	0
uc010odp.1	chr1:21835858..21904904,+	BRCA_ctrl	BRCA_cancer	ALPL	21.3629	8.78437	-1.30319	5.35608e-23	1.25286	1.46559	0.225675	0.678205	0.053	0.124	0.07	1	2.48597e-05	FALSE	0.999999	TRUE	no	yes	FALSE	0
uc001hmn.3	chr1:220701568..220837798,+	BRCA_ctrl	BRCA_cancer	MARK1	3.86856	1.79135	-1.19206	6.61726e-23	2.75345	0.95065	-1.53367	6.64774e-20	0.697	0.518	-0.178	1.32369e-06	1.32369e-06	FALSE	1	TRUE	no	yes	NA	0
uc001bfg.1	chr1:22138758..22151714,+	BRCA_ctrl	BRCA_cancer	LDLRAD2	9.63768	5.13408	-0.782102	2.7931e-14	1.38986	0.962173	-0.529624	3.47421e-10	0.169	0.345	0.176	1.46267e-14	1.46267e-14	FALSE	0.995019	TRUE	yes	yes	TRUE	0
uc001bfh.1	chr1:22138758..22151714,+	BRCA_ctrl	BRCA_cancer	LDLRAD2	9.63768	5.13408	-0.782102	2.7931e-14	8.24782	4.17191	-0.983812	1.8709e-10	0.831	0.655	-0.176	1.46267e-14	1.46267e-14	NA	0.193907	FALSE	NA	NA	TRUE	0
uc010pvw.1	chr1:228353429..228369957,+	BRCA_ctrl	BRCA_cancer	C1orf69	1.85795	1.6223	-0.171676	0.0157534	1.34627	0.618468	-1.12182	4.89414e-06	0.726	0.382	-0.344	6.41756e-07	6.41756e-07	FALSE	0.969618	TRUE	no	yes	NA	0
uc001hss.2	chr1:228581379..228594517,-	BRCA_ctrl	BRCA_cancer	TRIM11	6.19686	15.3169	1.30547	4.21272e-84	3.66633	13.0826	1.8349	2.82412e-16	0.525	0.826	0.302	0.000104488	0.000104488	FALSE	1	TRUE	no	yes	FALSE	0
uc010pvx.1	chr1:228581379..228594517,-	BRCA_ctrl	BRCA_cancer	TRIM11	6.19686	15.3169	1.30547	4.21272e-84	2.27416	1.5606	-0.543058	0.621517	0.43	0.125	-0.305	0.000129436	0.000104488	FALSE	1	TRUE	no	yes	FALSE	0
uc001hwb.2	chr1:234509275..234519790,+	BRCA_ctrl	BRCA_cancer	C1orf31	14.9763	33.6592	1.16607	2.50911e-58	11.1634	29.4654	1.40025	2.25089e-69	0.746	0.866	0.12	1.56334e-15	1.56334e-15	FALSE	0.0826872	FALSE	no	yes	TRUE	0
uc001hwc.2	chr1:234509275..234519790,+	BRCA_ctrl	BRCA_cancer	C1orf31	14.9763	33.6592	1.16607	2.50911e-58	3.81282	4.19383	0.138561	0.138463	0.254	0.134	-0.12	1.56334e-15	1.56334e-15	FALSE	0.123928	FALSE	no	yes	TRUE	0
uc001bgt.2	chr1:23685942..23696357,-	BRCA_ctrl	BRCA_cancer	ZNF436	16.5815	10.6346	-0.657301	1.04886e-28	6.02575	6.87518	0.190026	0.0060699	0.396	0.673	0.277	9.54235e-13	9.54235e-13	FALSE	0.999988	TRUE	no	yes	FALSE	0
uc001bgu.2	chr1:23685942..23696357,-	BRCA_ctrl	BRCA_cancer	ZNF436	16.5815	10.6346	-0.657301	1.04886e-28	10.5557	3.75945	-1.48928	1.84582e-34	0.604	0.327	-0.277	9.54235e-13	9.54235e-13	FALSE	0.999987	TRUE	no	yes	FALSE	0
uc001bhx.1	chr1:24122089..24127294,-	BRCA_ctrl	BRCA_cancer	GALE	7.88461	23.7672	1.58359	1.9909e-59	3.09958	12.9773	2.06509	2.92073e-30	0.341	0.527	0.186	1.36422e-09	1.36422e-09	FALSE	0.999976	TRUE	no	yes	FALSE	0
uc001bhy.1	chr1:24122089..24127294,-	BRCA_ctrl	BRCA_cancer	GALE	7.88461	23.7672	1.58359	1.9909e-59	0.778832	1.55307	0.992844	1.31923e-16	0.099	0.067	-0.033	1	1.36422e-09	FALSE	0.99983	TRUE	no	yes	FALSE	1
uc009vqo.1	chr1:24122089..24127294,-	BRCA_ctrl	BRCA_cancer	GALE	7.88461	23.7672	1.58359	1.9909e-59	2.87051	6.01346	1.06636	2.11333e-18	0.406	0.264	-0.142	6.96257e-06	1.36422e-09	FALSE	0.999976	TRUE	no	yes	FALSE	0
uc001ibi.2	chr1:245912645..246670614,-	BRCA_ctrl	BRCA_cancer	SMYD3	6.31461	17.1951	1.38559	1.35954e-41	0.472363	2.23081	2.2351	2.22136e-21	0.075	0.136	0.062	1	1.50607e-08	FALSE	0.976693	TRUE	no	yes	NA	0
uc001ibk.2	chr1:245912645..246670614,-	BRCA_ctrl	BRCA_cancer	SMYD3	6.31461	17.1951	1.38559	1.35954e-41	0.914611	5.74068	2.64757	1.92061e-12	0.144	0.234	0.09	1	1.50607e-08	FALSE	0.999795	TRUE	no	yes	NA	0
uc001ibl.2	chr1:245912645..246670614,-	BRCA_ctrl	BRCA_cancer	SMYD3	6.31461	17.1951	1.38559	1.35954e-41	4.88696	9.13127	0.901673	4.09365e-22	0.775	0.624	-0.151	1.50607e-08	1.50607e-08	FALSE	0.999975	TRUE	no	yes	NA	0
uc001bmr.1	chr1:26856249..26901520,+	BRCA_ctrl	BRCA_cancer	RPS6KA1	11.8416	18.6692	0.65273	7.84277e-21	5.95212	9.80996	0.720688	2.03641e-07	0.446	0.513	0.067	1	0.00320399	FALSE	1	TRUE	no	yes	NA	0
uc001bms.1	chr1:26856249..26901520,+	BRCA_ctrl	BRCA_cancer	RPS6KA1	11.8416	18.6692	0.65273	7.84277e-21	4.31847	4.75399	0.138589	0.485717	0.427	0.276	-0.151	0.00320399	0.00320399	FALSE	1	TRUE	no	yes	NA	0
uc010ofe.1	chr1:26856249..26901520,+	BRCA_ctrl	BRCA_cancer	RPS6KA1	11.8416	18.6692	0.65273	7.84277e-21	1.45139	3.96133	1.4479	6.72753e-06	0.116	0.203	0.087	1	0.00320399	FALSE	1	TRUE	no	yes	NA	0
uc001bny.1	chr1:27681670..27693337,-	BRCA_ctrl	BRCA_cancer	MAP3K6	10.4241	7.68846	-0.428782	3.61122e-09	3.97168	1.74942	-1.18258	2.57686e-08	0.377	0.211	-0.166	1.81451e-11	1.44082e-11	FALSE	1	TRUE	no	yes	FALSE	0
uc009vsw.1	chr1:27681670..27693337,-	BRCA_ctrl	BRCA_cancer	MAP3K6	10.4241	7.68846	-0.428782	3.61122e-09	5.92675	5.64472	-0.0704361	0.470999	0.566	0.747	0.181	1.44082e-11	1.44082e-11	FALSE	1	TRUE	no	yes	FALSE	0
uc001bqe.1	chr1:28844745..28865607,+	BRCA_ctrl	BRCA_cancer	RCC1	6.8905	19.8203	1.51773	2.29723e-60	2.97264	5.12942	0.786869	2.80369e-11	0.467	0.282	-0.185	4.53963e-10	5.94627e-12	FALSE	0.999997	TRUE	no	yes	FALSE	0
uc001bqg.1	chr1:28844745..28865607,+	BRCA_ctrl	BRCA_cancer	RCC1	6.8905	19.8203	1.51773	2.29723e-60	3.51299	13.9758	1.99181	2.96556e-55	0.457	0.678	0.221	5.94627e-12	5.94627e-12	FALSE	0.999994	TRUE	no	yes	FALSE	0
uc001bsn.2	chr1:31652593..31712400,-	BRCA_ctrl	BRCA_cancer	NKAIN1	1.27369	19.0025	3.90705	4.23166e-42	0.609903	8.65074	3.82443	6.09034e-23	0.251	0.448	0.196	0.000104871	4.01714e-07	FALSE	0.990609	TRUE	no	yes	TRUE	0
uc010ogc.1	chr1:31652593..31712400,-	BRCA_ctrl	BRCA_cancer	NKAIN1	1.27369	19.0025	3.90705	4.23166e-42	0.268894	2.26444	3.06947	4.33509e-21	0.567	0.271	-0.296	4.01714e-07	4.01714e-07	FALSE	0.98754	TRUE	no	yes	TRUE	0
uc010ogd.1	chr1:31652593..31712400,-	BRCA_ctrl	BRCA_cancer	NKAIN1	1.27369	19.0025	3.90705	4.23166e-42	0.394894	8.08732	4.35354	7.09266e-18	0.182	0.281	0.1	1	4.01714e-07	FALSE	0.99799	TRUE	yes	yes	TRUE	0
uc001bum.2	chr1:32671236..32674288,+	BRCA_ctrl	BRCA_cancer	IQCC	1.97646	2.96708	0.566482	3.76975e-17	0.984858	1.85846	0.914638	3.03351e-15	0.49	0.614	0.124	4.99534e-09	4.99534e-09	FALSE	0.999959	TRUE	no	no	NA	0
uc001bvn.2	chr1:32930658..33071541,+	BRCA_ctrl	BRCA_cancer	ZBTB8A	2.69009	2.76912	-0.140434	0.0114745	2.30636	1.97962	-0.220141	6.08066e-05	0.864	0.735	-0.129	3.44315e-15	3.44315e-15	FALSE	0.999888	TRUE	no	yes	NA	0
uc001bvt.2	chr1:33145507..33168361,-	BRCA_ctrl	BRCA_cancer	SYNC	6.66582	5.59853	-0.267414	0.0411127	4.66642	1.26865	-1.87809	4.9005e-53	0.602	0.308	-0.294	4.46822e-10	4.46822e-10	FALSE	0.999999	TRUE	no	yes	FALSE	0
uc010ohl.1	chr1:33145507..33168361,-	BRCA_ctrl	BRCA_cancer	SYNC	6.66582	5.59853	-0.267414	0.0411127	1.99941	4.32988	1.1143	1.36722e-11	0.398	0.692	0.294	4.46822e-10	4.46822e-10	FALSE	0.999999	TRUE	no	yes	FALSE	0
uc001bwo.1	chr1:33473586..33502492,-	BRCA_ctrl	BRCA_cancer	AK2	53.8347	67.4688	0.167403	0.00150147	17.049	17.6973	0.0538543	0.542112	0.321	0.264	-0.057	1	1.31561e-14	FALSE	0.995916	TRUE	no	yes	NA	0
uc001bwp.1	chr1:33473586..33502492,-	BRCA_ctrl	BRCA_cancer	AK2	53.8347	67.4688	0.167403	0.00150147	28.1576	44.41	0.657458	2.46381e-30	0.521	0.656	0.136	1.31561e-14	1.31561e-14	FALSE	0.997048	TRUE	no	yes	NA	0
uc009vud.1	chr1:33473586..33502492,-	BRCA_ctrl	BRCA_cancer	AK2	53.8347	67.4688	0.167403	0.00150147	3.63897	3.12316	-0.220532	0.325219	0.069	0.045	-0.024	1	1.31561e-14	FALSE	0.991387	TRUE	no	yes	NA	0
uc010ohr.1	chr1:33473586..33502492,-	BRCA_ctrl	BRCA_cancer	AK2	53.8347	67.4688	0.167403	0.00150147	4.02864	1.1132	-1.85357	1.68176e-10	0.072	0.018	-0.054	1	1.31561e-14	FALSE	0.985887	TRUE	no	yes	NA	0
uc001aky.2	chr1:3728645..3773797,-	BRCA_ctrl	BRCA_cancer	KIAA0562	7.40288	6.37839	-0.240804	5.52034e-07	4.11206	2.36378	-0.798562	1.00586e-31	0.561	0.371	-0.19	1.52701e-15	6.45849e-16	FALSE	1	TRUE	no	no	TRUE	1
uc010nzm.1	chr1:3728645..3773797,-	BRCA_ctrl	BRCA_cancer	KIAA0562	7.40288	6.37839	-0.240804	5.52034e-07	2.63204	3.44611	0.388957	6.58621e-11	0.357	0.551	0.195	6.45849e-16	6.45849e-16	NA	1	TRUE	NA	NA	TRUE	0
uc001ccf.1	chr1:38326369..38412729,-	BRCA_ctrl	BRCA_cancer	INPP5B	7.88119	5.39313	-0.560285	3.15159e-29	5.9683	4.75147	-0.328929	1.18312e-09	0.763	0.883	0.12	1.3841e-11	1.3841e-11	FALSE	1	TRUE	no	yes	TRUE	0
uc001ccg.1	chr1:38326369..38412729,-	BRCA_ctrl	BRCA_cancer	INPP5B	7.88119	5.39313	-0.560285	3.15159e-29	1.49598	0.392904	-1.92719	4.73711e-29	0.185	0.071	-0.115	1	1.3841e-11	FALSE	1	TRUE	no	yes	TRUE	0
uc001cds.1	chr1:40204530..40229585,+	BRCA_ctrl	BRCA_cancer	PPIE	27.4877	27.715	0.00954377	0.943268	15.4556	18.9707	0.295678	0.0101861	0.559	0.686	0.127	9.28402e-08	9.28402e-08	FALSE	0.999707	TRUE	no	yes	NA	0
uc001cdt.1	chr1:40204530..40229585,+	BRCA_ctrl	BRCA_cancer	PPIE	27.4877	27.715	0.00954377	0.943268	2.3709	1.84173	-0.364202	0.630035	0.09	0.064	-0.026	1	9.28402e-08	FALSE	0.995797	TRUE	no	yes	NA	0
uc001cdv.2	chr1:40204530..40229585,+	BRCA_ctrl	BRCA_cancer	PPIE	27.4877	27.715	0.00954377	0.943268	4.04992	2.45468	-0.722537	2.52149e-17	0.147	0.089	-0.058	1	9.28402e-08	FALSE	0.99938	TRUE	no	yes	NA	0
uc001cdw.2	chr1:40204530..40229585,+	BRCA_ctrl	BRCA_cancer	PPIE	27.4877	27.715	0.00954377	0.943268	2.95109	2.04042	-0.532903	4.73364e-08	0.106	0.073	-0.033	1	9.28402e-08	FALSE	0.999672	TRUE	no	yes	NA	0
uc010oiy.1	chr1:40204530..40229585,+	BRCA_ctrl	BRCA_cancer	PPIE	27.4877	27.715	0.00954377	0.943268	1.76315	1.55725	-0.17987	0.141108	0.064	0.055	-0.009	1	9.28402e-08	FALSE	0.993036	TRUE	no	yes	NA	0
uc001chk.2	chr1:42922173..42926085,+	BRCA_ctrl	BRCA_cancer	PPCS	48.2636	53.4393	0.24203	3.8332e-07	38.5009	33.3637	-0.206573	0.000944241	0.792	0.614	-0.178	6.66373e-17	6.66373e-17	FALSE	0.514486	TRUE	no	yes	TRUE	0
uc001chl.2	chr1:42922173..42926085,+	BRCA_ctrl	BRCA_cancer	PPCS	48.2636	53.4393	0.24203	3.8332e-07	9.76273	20.0756	1.03998	3.05222e-68	0.208	0.386	0.178	6.66373e-17	6.66373e-17	FALSE	0.998999	TRUE	no	yes	TRUE	0
uc001ckc.2	chr1:44171495..44396830,+	BRCA_ctrl	BRCA_cancer	ST3GAL3	8.45311	4.31741	-1.06055	8.82541e-68	4.69897	1.08759	-2.10978	6.9175e-35	0.529	0.279	-0.25	1.34421e-07	1.34421e-07	FALSE	0.999977	TRUE	no	yes	TRUE	0
uc009vwy.2	chr1:44171495..44396830,+	BRCA_ctrl	BRCA_cancer	ST3GAL3	8.45311	4.31741	-1.06055	8.82541e-68	1.23772	1.5772	0.350025	0.122581	0.161	0.349	0.188	4.62338e-06	1.34421e-07	FALSE	0.999707	TRUE	no	yes	TRUE	0
uc001coh.1	chr1:46049717..46084567,+	BRCA_ctrl	BRCA_cancer	NASP	31.9257	39.0041	0.359208	1.54219e-07	1.81447	2.03697	0.166792	0.262586	0.057	0.05	-0.007	1	5.12624e-16	FALSE	1	TRUE	yes	yes	TRUE	0
uc001coi.1	chr1:46049717..46084567,+	BRCA_ctrl	BRCA_cancer	NASP	31.9257	39.0041	0.359208	1.54219e-07	1.81968	10.3585	2.50874	6.65516e-37	0.055	0.26	0.206	5.12624e-16	5.12624e-16	FALSE	1	TRUE	no	yes	TRUE	0
uc001coj.1	chr1:46049717..46084567,+	BRCA_ctrl	BRCA_cancer	NASP	31.9257	39.0041	0.359208	1.54219e-07	22.4942	21.7598	-0.0479345	0.641501	0.705	0.555	-0.15	1.3841e-11	5.12624e-16	FALSE	0.999996	TRUE	no	yes	TRUE	0
uc001cok.1	chr1:46049717..46084567,+	BRCA_ctrl	BRCA_cancer	NASP	31.9257	39.0041	0.359208	1.54219e-07	2.09017	1.33038	-0.651426	1.81878e-11	0.066	0.039	-0.028	1	5.12624e-16	FALSE	0.999928	TRUE	no	no	TRUE	1
uc001col.1	chr1:46049717..46084567,+	BRCA_ctrl	BRCA_cancer	NASP	31.9257	39.0041	0.359208	1.54219e-07	3.35831	2.77083	-0.277587	0.00255656	0.107	0.077	-0.03	1	5.12624e-16	FALSE	0.999112	TRUE	no	yes	TRUE	0
uc001cpr.1	chr1:46806390..46830690,+	BRCA_ctrl	BRCA_cancer	NSUN4	6.65108	6.67094	0.00854825	0.932319	4.89487	5.6401	0.204477	0.000170518	0.738	0.841	0.102	6.35165e-11	6.35165e-11	FALSE	0.999898	TRUE	no	yes	NA	NA
uc001csf.2	chr1:51434367..51440307,+	BRCA_ctrl	BRCA_cancer	CDKN2C	37.8201	10.9024	-1.46217	9.25403e-73	3.27127	5.58251	0.771604	1.1318e-11	0.12	0.5	0.38	4.34457e-17	4.34457e-17	FALSE	0.669743	TRUE	no	yes	FALSE	0
uc001csg.2	chr1:51434367..51440307,+	BRCA_ctrl	BRCA_cancer	CDKN2C	37.8201	10.9024	-1.46217	9.25403e-73	34.5488	5.31992	-2.69867	2.29986e-263	0.88	0.5	-0.38	4.34457e-17	4.34457e-17	FALSE	0.914754	TRUE	no	yes	FALSE	0
uc001cuq.1	chr1:53392948..53517282,+	BRCA_ctrl	BRCA_cancer	SCP2	96.3951	79.7008	-0.442745	3.91722e-14	1.22803	0.382263	-1.67859	9.10565e-46	0.012	0.005	-0.007	1	1.88361e-12	FALSE	0.997388	TRUE	no	yes	TRUE	0
uc001cur.1	chr1:53392948..53517282,+	BRCA_ctrl	BRCA_cancer	SCP2	96.3951	79.7008	-0.442745	3.91722e-14	47.5976	25.0669	-0.925061	2.87618e-19	0.463	0.297	-0.166	2.94953e-12	1.88361e-12	FALSE	0.999999	TRUE	no	yes	TRUE	0
uc001cut.1	chr1:53392948..53517282,+	BRCA_ctrl	BRCA_cancer	SCP2	96.3951	79.7008	-0.442745	3.91722e-14	39.3526	45.0446	0.1949	0.00389965	0.439	0.579	0.141	1.88361e-12	1.88361e-12	FALSE	0.823083	TRUE	no	yes	TRUE	0
uc001cuu.1	chr1:53392948..53517282,+	BRCA_ctrl	BRCA_cancer	SCP2	96.3951	79.7008	-0.442745	3.91722e-14	3.60423	4.92903	0.451554	3.58725e-07	0.038	0.063	0.026	1	1.88361e-12	FALSE	0.0207525	FALSE	no	no	TRUE	0
uc009vzi.1	chr1:53392948..53517282,+	BRCA_ctrl	BRCA_cancer	SCP2	96.3951	79.7008	-0.442745	3.91722e-14	3.36746	3.22547	-0.0621081	0.76268	0.035	0.041	0.006	1	1.88361e-12	FALSE	0.999995	TRUE	no	yes	TRUE	0
uc001cxd.2	chr1:54692196..54872092,-	BRCA_ctrl	BRCA_cancer	SSBP3	25.9591	22.2458	-0.227055	0.000113163	13.241	11.3504	-0.222538	0.00430251	0.504	0.499	-0.005	1	7.37763e-17	FALSE	0.225531	FALSE	no	yes	FALSE	0
uc001cxe.2	chr1:54692196..54872092,-	BRCA_ctrl	BRCA_cancer	SSBP3	25.9591	22.2458	-0.227055	0.000113163	0.303973	3.17074	3.37558	3.70978e-47	0.013	0.138	0.126	7.37763e-17	7.37763e-17	FALSE	0.99932	TRUE	no	yes	FALSE	0
uc001cxg.2	chr1:54692196..54872092,-	BRCA_ctrl	BRCA_cancer	SSBP3	25.9591	22.2458	-0.227055	0.000113163	12.4076	7.70725	-0.686846	6.5932e-24	0.483	0.362	-0.121	3.87051e-15	7.37763e-17	FALSE	0.99803	TRUE	no	yes	FALSE	0
uc001amq.2	chr1:6324333..6453826,-	BRCA_ctrl	BRCA_cancer	ACOT7	8.65309	21.3401	1.33457	3.00607e-47	4.62584	7.62553	0.721047	8.89511e-10	0.522	0.376	-0.146	4.09323e-10	4.09323e-10	FALSE	0.999983	TRUE	no	yes	NA	0
uc001ams.2	chr1:6324333..6453826,-	BRCA_ctrl	BRCA_cancer	ACOT7	8.65309	21.3401	1.33457	3.00607e-47	0.427894	2.71216	2.65876	2.99325e-40	0.046	0.124	0.079	1	4.09323e-10	FALSE	0.999993	TRUE	no	yes	NA	0
uc001amt.2	chr1:6324333..6453826,-	BRCA_ctrl	BRCA_cancer	ACOT7	8.65309	21.3401	1.33457	3.00607e-47	0.818619	3.17725	1.95594	1.9174e-39	0.086	0.141	0.055	1	4.09323e-10	FALSE	0.999994	TRUE	no	yes	NA	0
uc010nzq.1	chr1:6324333..6453826,-	BRCA_ctrl	BRCA_cancer	ACOT7	8.65309	21.3401	1.33457	3.00607e-47	2.7743	7.77901	1.48685	8.90775e-24	0.346	0.356	0.011	1	4.09323e-10	FALSE	0.999847	TRUE	no	yes	NA	0
uc001ann.1	chr1:6526152..6580069,-	BRCA_ctrl	BRCA_cancer	PLEKHG5	6.40506	3.68136	-0.879857	2.946e-26	2.74084	0.536668	-2.35153	5.79882e-17	0.388	0.143	-0.245	1.54009e-12	1.54009e-12	FALSE	1	TRUE	no	yes	NA	0
uc001dcj.2	chr1:65886318..66102820,+	BRCA_ctrl	BRCA_cancer	LEPR	20.6728	3.05163	-3.10577	3.82205e-257	1.12575	0.239051	-2.23163	2.85732e-54	0.05	0.086	0.036	1	7.48316e-17	FALSE	1	TRUE	no	yes	NA	0
uc001dck.2	chr1:65886318..66102820,+	BRCA_ctrl	BRCA_cancer	LEPR	20.6728	3.05163	-3.10577	3.82205e-257	17.8595	1.72647	-3.37042	6.96723e-191	0.845	0.502	-0.343	7.48316e-17	7.48316e-17	FALSE	1	TRUE	no	yes	NA	0
uc001des.2	chr1:70671365..70717683,+	BRCA_ctrl	BRCA_cancer	SFRS11	51.8985	48.2853	-0.138063	0.00424682	8.71887	14.1208	0.695538	1.9391e-11	0.186	0.312	0.126	6.06266e-12	6.06266e-12	FALSE	0.999987	TRUE	no	yes	NA	0
uc001det.2	chr1:70671365..70717683,+	BRCA_ctrl	BRCA_cancer	SFRS11	51.8985	48.2853	-0.138063	0.00424682	14.8794	14.0561	-0.0820949	0.130108	0.288	0.294	0.005	1	6.06266e-12	FALSE	0.999987	TRUE	no	yes	NA	0
uc001deu.2	chr1:70671365..70717683,+	BRCA_ctrl	BRCA_cancer	SFRS11	51.8985	48.2853	-0.138063	0.00424682	3.47335	3.9205	0.174837	0.0877448	0.069	0.081	0.012	1	6.06266e-12	FALSE	0.999899	TRUE	no	yes	NA	0
uc001dev.2	chr1:70671365..70717683,+	BRCA_ctrl	BRCA_cancer	SFRS11	51.8985	48.2853	-0.138063	0.00424682	10.69	6.16035	-0.795123	2.10373e-15	0.195	0.118	-0.078	1	6.06266e-12	FALSE	0.988067	TRUE	no	no	NA	0
uc001dew.2	chr1:70671365..70717683,+	BRCA_ctrl	BRCA_cancer	SFRS11	51.8985	48.2853	-0.138063	0.00424682	9.30565	7.35766	-0.338887	0.000388632	0.175	0.145	-0.03	1	6.06266e-12	FALSE	0.999789	TRUE	no	no	NA	1
uc009wbi.2	chr1:70671365..70717683,+	BRCA_ctrl	BRCA_cancer	SFRS11	51.8985	48.2853	-0.138063	0.00424682	4.2066	2.25909	-0.896312	3.75229e-15	0.074	0.042	-0.032	1	6.06266e-12	FALSE	0.652274	TRUE	no	yes	NA	0
uc001dfs.2	chr1:71528975..71546745,-	BRCA_ctrl	BRCA_cancer	ZRANB2	30.869	23.0659	-0.424284	1.31159e-22	16.452	9.90447	-0.732088	1.72417e-40	0.538	0.426	-0.112	1.36065e-14	1.36065e-14	FALSE	0.997521	TRUE	no	yes	FALSE	0
uc001dft.2	chr1:71528975..71546745,-	BRCA_ctrl	BRCA_cancer	ZRANB2	30.869	23.0659	-0.424284	1.31159e-22	14.417	13.1614	-0.131465	0.0147168	0.462	0.574	0.112	1.36065e-14	1.36065e-14	FALSE	0.997957	TRUE	no	yes	FALSE	0
uc001dlm.1	chr1:86814412..86862003,-	BRCA_ctrl	BRCA_cancer	ODF2L	8.27398	8.33207	-0.089775	0.253051	2.06902	1.73117	-0.257288	0.0190926	0.248	0.219	-0.029	1	1.89189e-11	FALSE	1	TRUE	no	no	FALSE	0
uc001dln.2	chr1:86814412..86862003,-	BRCA_ctrl	BRCA_cancer	ODF2L	8.27398	8.33207	-0.089775	0.253051	1.97631	0.82647	-1.25675	4.47171e-05	0.242	0.11	-0.132	9.40796e-10	1.89189e-11	FALSE	1	TRUE	no	no	FALSE	0
uc001dlo.2	chr1:86814412..86862003,-	BRCA_ctrl	BRCA_cancer	ODF2L	8.27398	8.33207	-0.089775	0.253051	2.1836	2.76957	0.342255	0.00143056	0.271	0.332	0.061	1	1.89189e-11	FALSE	0.999996	TRUE	no	no	FALSE	0
uc010osg.1	chr1:86814412..86862003,-	BRCA_ctrl	BRCA_cancer	ODF2L	8.27398	8.33207	-0.089775	0.253051	1.36022	2.36517	0.797343	1.84367e-07	0.156	0.261	0.105	1.89189e-11	1.89189e-11	FALSE	1	TRUE	no	no	FALSE	0
uc001dmf.2	chr1:87458690..87634884,+	BRCA_ctrl	BRCA_cancer	LOC339524	19.0314	2.47009	-2.84274	1.22363e-181	17.4784	2.06029	-3.08363	2.00027e-133	0.88	0.733	-0.147	0.000113898	0.000113898	NA	0.0145379	FALSE	NA	NA	NA	NA
uc001dnq.2	chr1:90460678..90494094,+	BRCA_ctrl	BRCA_cancer	ZNF326	8.81271	9.24381	0.106427	0.0445763	5.62071	7.14532	0.346183	2.7986e-07	0.645	0.766	0.121	4.13173e-14	4.13173e-14	FALSE	1	TRUE	no	yes	NA	0
uc001dnr.2	chr1:90460678..90494094,+	BRCA_ctrl	BRCA_cancer	ZNF326	8.81271	9.24381	0.106427	0.0445763	1.27332	0.876645	-0.538684	6.13811e-06	0.142	0.1	-0.041	1	4.13173e-14	FALSE	0.999839	TRUE	no	yes	NA	0
uc009wda.1	chr1:90460678..90494094,+	BRCA_ctrl	BRCA_cancer	ZNF326	8.81271	9.24381	0.106427	0.0445763	1.14396	0.617091	-0.889919	5.29358e-09	0.13	0.071	-0.059	1	4.13173e-14	FALSE	0.999996	TRUE	no	yes	NA	0
uc001apo.2	chr1:9097007..9148510,-	BRCA_ctrl	BRCA_cancer	SLC2A5	2.97122	2.32685	-0.43865	0.00247542	2.43361	1.23267	-0.980345	5.75725e-05	0.642	0.439	-0.203	0.0009463	0.0009463	FALSE	1	TRUE	no	yes	NA	0
uc001doe.2	chr1:91966404..91991320,+	BRCA_ctrl	BRCA_cancer	CDC7	1.2825	4.41412	1.78607	1.06156e-49	0.536752	2.41222	2.16642	1.63127e-14	0.352	0.477	0.125	0.00016488	0.00016488	FALSE	0.999999	TRUE	no	yes	NA	NA
uc001dox.2	chr1:92974255..93257961,-	BRCA_ctrl	BRCA_cancer	EVI5	3.91718	2.57293	-0.597376	1.61396e-28	2.34361	2.01987	-0.214389	0.0042016	0.636	0.804	0.169	2.00174e-05	5.68346e-06	FALSE	1	TRUE	no	yes	FALSE	0
uc010otf.1	chr1:92974255..93257961,-	BRCA_ctrl	BRCA_cancer	EVI5	3.91718	2.57293	-0.597376	1.61396e-28	1.31432	0.40336	-1.70337	7.58674e-10	0.302	0.145	-0.157	5.68346e-06	5.68346e-06	FALSE	1	TRUE	no	yes	FALSE	0
uc001aci.2	chr1:934342..935552,-	BRCA_ctrl	BRCA_cancer	HES4	1.5882	4.81708	1.57604	4.58979e-24	0.759637	3.29002	2.1107	1.15937e-21	0.405	0.629	0.224	7.02163e-07	7.02163e-07	FALSE	0.997512	TRUE	no	yes	NA	0
uc001dpv.2	chr1:93913839..94020216,+	BRCA_ctrl	BRCA_cancer	FNBP1L	27.4066	29.6498	0.0655314	0.409853	10.7972	5.94135	-0.861696	7.78359e-10	0.403	0.198	-0.206	1.96085e-12	1.96085e-12	FALSE	0.999999	TRUE	no	yes	TRUE	0
uc001dpw.2	chr1:93913839..94020216,+	BRCA_ctrl	BRCA_cancer	FNBP1L	27.4066	29.6498	0.0655314	0.409853	13.0206	14.8272	0.187428	0.0908369	0.454	0.474	0.02	1	1.96085e-12	FALSE	0.999999	TRUE	no	yes	TRUE	1
uc010otl.1	chr1:93913839..94020216,+	BRCA_ctrl	BRCA_cancer	FNBP1L	27.4066	29.6498	0.0655314	0.409853	3.56221	8.83108	1.30955	4.93593e-14	0.142	0.326	0.184	1	1.96085e-12	FALSE	0.862435	TRUE	no	no	TRUE	0
uc001dpx.3	chr1:94027351..94312706,-	BRCA_ctrl	BRCA_cancer	BCAR3	14.5915	13.9109	-0.0964454	0.38021	3.19219	4.58724	0.522602	6.28063e-06	0.226	0.358	0.132	1.43628e-10	1.43628e-10	FALSE	0.999998	TRUE	no	yes	TRUE	0
uc001dpy.2	chr1:94027351..94312706,-	BRCA_ctrl	BRCA_cancer	BCAR3	14.5915	13.9109	-0.0964454	0.38021	6.72055	4.19665	-0.679219	6.15685e-06	0.454	0.287	-0.167	1.20209e-09	1.43628e-10	FALSE	1	TRUE	no	yes	TRUE	0
uc001dqa.2	chr1:94027351..94312706,-	BRCA_ctrl	BRCA_cancer	BCAR3	14.5915	13.9109	-0.0964454	0.38021	3.89322	4.79621	0.301002	0.0631715	0.263	0.325	0.062	1	1.43628e-10	FALSE	1	TRUE	no	yes	TRUE	0
uc001apy.2	chr1:9648977..9674935,+	BRCA_ctrl	BRCA_cancer	TMEM201	4.25419	4.97716	0.219546	0.000738263	2.55419	2.17023	-0.234271	0.000808688	0.59	0.446	-0.144	9.14117e-16	9.14117e-16	FALSE	0.999993	TRUE	no	yes	TRUE	0
uc001apz.2	chr1:9648977..9674935,+	BRCA_ctrl	BRCA_cancer	TMEM201	4.25419	4.97716	0.219546	0.000738263	1.7	2.80693	0.722879	8.78216e-20	0.41	0.554	0.144	9.14117e-16	9.14117e-16	FALSE	1	TRUE	no	yes	TRUE	0
uc001aqf.2	chr1:9789080..9884550,-	BRCA_ctrl	BRCA_cancer	CLSTN1	62.0762	72.2462	0.114559	0.0520478	23.4284	34.1783	0.544708	4.57839e-10	0.375	0.46	0.086	1	6.90461e-16	FALSE	0.99962	TRUE	no	no	NA	0
uc001aqh.2	chr1:9789080..9884550,-	BRCA_ctrl	BRCA_cancer	CLSTN1	62.0762	72.2462	0.114559	0.0520478	1.52533	0.0695082	-4.44757	0.00335383	0.046	0.001	-0.045	1	6.90461e-16	FALSE	1	TRUE	yes	yes	NA	0
uc001aqi.2	chr1:9789080..9884550,-	BRCA_ctrl	BRCA_cancer	CLSTN1	62.0762	72.2462	0.114559	0.0520478	20.2935	13.4822	-0.589953	3.01668e-10	0.327	0.194	-0.133	6.90461e-16	6.90461e-16	FALSE	1	TRUE	yes	yes	NA	0
uc010oag.1	chr1:9789080..9884550,-	BRCA_ctrl	BRCA_cancer	CLSTN1	62.0762	72.2462	0.114559	0.0520478	16.829	24.5162	0.542747	4.54189e-09	0.253	0.345	0.092	1	6.90461e-16	FALSE	1	TRUE	yes	yes	NA	0
uc001aqo.2	chr1:9989778..10003427,-	BRCA_ctrl	BRCA_cancer	LZIC	13.0161	12.58	-0.0349729	0.586335	7.3092	10.1157	0.468795	5.40578e-09	0.572	0.82	0.248	1.11792e-06	1.11792e-06	FALSE	0.926391	TRUE	no	yes	FALSE	0
uc009vmr.2	chr1:9989778..10003427,-	BRCA_ctrl	BRCA_cancer	LZIC	13.0161	12.58	-0.0349729	0.586335	5.60307	2.33058	-1.26494	0.00682997	0.418	0.167	-0.25	3.74713e-06	1.11792e-06	FALSE	0.926639	TRUE	no	yes	FALSE	0
uc001kqd.3	chr10:101491958..101515893,+	BRCA_ctrl	BRCA_cancer	CUTC	19.3302	8.08922	-1.26157	1.00712e-149	15.1823	4.92375	-1.62328	1.61033e-138	0.733	0.595	-0.138	1.26135e-12	9.54235e-13	FALSE	0.987537	TRUE	no	yes	TRUE	0
uc001kqe.3	chr10:101491958..101515893,+	BRCA_ctrl	BRCA_cancer	CUTC	19.3302	8.08922	-1.26157	1.00712e-149	3.87749	3.03	-0.354464	2.12568e-08	0.25	0.387	0.137	9.54235e-13	9.54235e-13	NA	0.91055	TRUE	NA	NA	TRUE	0
uc001ktx.2	chr10:103585732..103603677,-	BRCA_ctrl	BRCA_cancer	KCNIP2	73.2467	1.83433	-5.3502	0	54.8508	1.20146	-5.51136	1.5214e-122	0.735	0.394	-0.341	1.70087e-07	1.70087e-07	NA	0.0396861	FALSE	NA	NA	TRUE	0
uc001kub.2	chr10:103585732..103603677,-	BRCA_ctrl	BRCA_cancer	KCNIP2	73.2467	1.83433	-5.3502	0	2.12042	0.00484735	-8.536	8.34452e-37	0.015	0.001	-0.014	1	1.70087e-07	FALSE	0.999453	TRUE	no	yes	TRUE	0
uc001kue.2	chr10:103585732..103603677,-	BRCA_ctrl	BRCA_cancer	KCNIP2	73.2467	1.83433	-5.3502	0	1.11006	0.0175923	-5.91119	6.85088e-43	0.012	0.005	-0.007	1	1.70087e-07	FALSE	0.998965	TRUE	no	yes	TRUE	0
uc001kuf.2	chr10:103585732..103603677,-	BRCA_ctrl	BRCA_cancer	KCNIP2	73.2467	1.83433	-5.3502	0	10.6771	0.157241	-6.0772	3.14849e-56	0.122	0.027	-0.095	1	1.70087e-07	FALSE	0.998082	TRUE	no	yes	TRUE	0
uc010qqg.1	chr10:103585732..103603677,-	BRCA_ctrl	BRCA_cancer	KCNIP2	73.2467	1.83433	-5.3502	0	1.05905	0.209561	-2.33159	1.21053e-30	0.054	0.258	0.204	0.000227863	1.70087e-07	FALSE	0.980154	TRUE	no	yes	TRUE	0
uc010qqi.1	chr10:103585732..103603677,-	BRCA_ctrl	BRCA_cancer	KCNIP2	73.2467	1.83433	-5.3502	0	1.2329	0.023958	-5.54482	4.08818e-72	0.015	0.01	-0.005	1	1.70087e-07	FALSE	0.992929	TRUE	no	yes	TRUE	0
uc001kvt.2	chr10:104221170..104238858,+	BRCA_ctrl	BRCA_cancer	TMEM180	1.26716	1.8788	0.626369	9.9743e-13	0.719832	1.28985	0.841423	9.62056e-17	0.572	0.703	0.13	1.61481e-06	1.61481e-06	FALSE	1	TRUE	no	yes	NA	0
uc001kxo.1	chr10:105727470..105787342,+	BRCA_ctrl	BRCA_cancer	SLK	23.0624	15.9861	-0.519483	1.50655e-16	6.82928	10.8255	0.664505	7.12552e-10	0.312	0.659	0.348	2.83967e-15	2.83967e-15	FALSE	1	TRUE	no	yes	FALSE	0
uc001kxp.1	chr10:105727470..105787342,+	BRCA_ctrl	BRCA_cancer	SLK	23.0624	15.9861	-0.519483	1.50655e-16	16.2331	5.16057	-1.65319	8.42328e-104	0.688	0.341	-0.348	2.83967e-15	2.83967e-15	FALSE	1	TRUE	no	yes	FALSE	0
uc001kxs.2	chr10:105881816..105886142,+	BRCA_ctrl	BRCA_cancer	C10orf78	4.57827	4.01768	-0.198051	5.04007e-05	2.23281	1.17427	-0.925975	0.000896573	0.475	0.292	-0.182	0.0070457	0.00460288	FALSE	0.885587	TRUE	no	yes	FALSE	0
uc001kxu.2	chr10:105881816..105886142,+	BRCA_ctrl	BRCA_cancer	C10orf78	4.57827	4.01768	-0.198051	5.04007e-05	2.05895	2.57285	0.32105	0.130118	0.461	0.64	0.179	0.00460288	0.00460288	FALSE	0.938272	TRUE	no	yes	FALSE	0
uc001iki.3	chr10:11047259..11378670,+	BRCA_ctrl	BRCA_cancer	CELF2	15.0126	3.66271	-2.05534	1.15695e-118	1.86435	0.802698	-1.21551	3.93432e-27	0.131	0.249	0.118	1	8.07999e-12	TRUE	0.999999	TRUE	no	yes	TRUE	1
uc001ikl.3	chr10:11047259..11378670,+	BRCA_ctrl	BRCA_cancer	CELF2	15.0126	3.66271	-2.05534	1.15695e-118	6.6387	0.514376	-3.68928	8.6986e-40	0.398	0.158	-0.241	8.07999e-12	8.07999e-12	TRUE	0.999999	TRUE	no	yes	TRUE	0
uc001iko.3	chr10:11047259..11378670,+	BRCA_ctrl	BRCA_cancer	CELF2	15.0126	3.66271	-2.05534	1.15695e-118	4.79205	1.53219	-1.64483	1.52522e-20	0.36	0.41	0.049	1	8.07999e-12	TRUE	0.999998	TRUE	no	yes	TRUE	0
uc001kzp.2	chr10:113909622..113943525,-	BRCA_ctrl	BRCA_cancer	GPAM	100.625	4.3576	-4.52991	0	45.5586	1.21472	-5.22859	2.21032e-165	0.401	0.215	-0.186	0.00335224	0.00335224	FALSE	1	TRUE	no	yes	FALSE	0
uc009xxy.1	chr10:113909622..113943525,-	BRCA_ctrl	BRCA_cancer	GPAM	100.625	4.3576	-4.52991	0	54.474	3.11131	-4.12983	2.107e-266	0.593	0.777	0.184	0.00352968	0.00335224	FALSE	1	TRUE	no	yes	FALSE	0
uc001lci.2	chr10:117816444..118033126,-	BRCA_ctrl	BRCA_cancer	GFRA1	18.9487	40.2176	1.09211	3.8851e-06	16.3439	21.8926	0.421694	0.0958654	0.889	0.655	-0.233	1.65799e-09	1.65799e-09	FALSE	0.999992	TRUE	yes	yes	FALSE	0
uc001lcj.2	chr10:117816444..118033126,-	BRCA_ctrl	BRCA_cancer	GFRA1	18.9487	40.2176	1.09211	3.8851e-06	0.383867	2.21412	2.52713	1.16386e-11	0.018	0.043	0.026	1	1.65799e-09	FALSE	0.999993	TRUE	yes	yes	FALSE	0
uc009xyr.2	chr10:117816444..118033126,-	BRCA_ctrl	BRCA_cancer	GFRA1	18.9487	40.2176	1.09211	3.8851e-06	2.22102	16.1109	2.85862	3.00879e-10	0.094	0.301	0.207	3.98397e-09	1.65799e-09	FALSE	0.999992	TRUE	yes	yes	FALSE	0
uc001ile.2	chr10:12171640..12211956,+	BRCA_ctrl	BRCA_cancer	SEC61A2	2.07381	3.65056	0.847336	2.40948e-28	1.09267	2.70429	1.30666	4.08565e-13	0.491	0.693	0.202	8.33166e-10	8.33166e-10	FALSE	0.999984	TRUE	no	yes	NA	0
uc001imi.2	chr10:13360083..13390280,-	BRCA_ctrl	BRCA_cancer	SEPHS1	21.597	26.5596	0.326359	4.43934e-07	8.0488	5.34247	-0.591177	3.39152e-05	0.367	0.204	-0.163	4.89168e-08	6.14009e-10	FALSE	0.999954	TRUE	no	yes	FALSE	0
uc001imk.2	chr10:13360083..13390280,-	BRCA_ctrl	BRCA_cancer	SEPHS1	21.597	26.5596	0.326359	4.43934e-07	10.7867	18.3203	0.764175	2.19494e-16	0.506	0.675	0.169	6.14009e-10	6.14009e-10	FALSE	0.999947	TRUE	no	yes	FALSE	0
uc010qbs.1	chr10:13360083..13390280,-	BRCA_ctrl	BRCA_cancer	SEPHS1	21.597	26.5596	0.326359	4.43934e-07	1.34275	1.53356	0.191156	0.562465	0.061	0.064	0.004	1	6.14009e-10	FALSE	0.999741	TRUE	yes	yes	FALSE	0
uc009ybi.2	chr10:135075921..135090372,-	BRCA_ctrl	BRCA_cancer	ADAM8	1.36931	7.01263	2.36611	1.28401e-64	0.697381	3.1193	2.15977	8.81475e-52	0.515	0.46	-0.055	1	2.22026e-05	FALSE	1	TRUE	yes	yes	NA	1
uc010quz.1	chr10:135075921..135090372,-	BRCA_ctrl	BRCA_cancer	ADAM8	1.36931	7.01263	2.36611	1.28401e-64	0.475558	3.08532	2.69559	5.01169e-45	0.301	0.408	0.107	2.22026e-05	2.22026e-05	FALSE	1	TRUE	yes	yes	NA	0
uc001ind.2	chr10:14880261..14913738,+	BRCA_ctrl	BRCA_cancer	HSPA14	10.8855	16.5434	0.569348	4.75555e-19	3.25989	3.58706	0.13816	0.142304	0.3	0.225	-0.075	1	3.65033e-15	FALSE	0.999527	TRUE	no	yes	NA	0
uc001ine.2	chr10:14880261..14913738,+	BRCA_ctrl	BRCA_cancer	HSPA14	10.8855	16.5434	0.569348	4.75555e-19	1.07035	0.939172	-0.188444	0.207306	0.098	0.056	-0.042	1	3.65033e-15	FALSE	0.60297	TRUE	no	yes	NA	0
uc001inf.2	chr10:14880261..14913738,+	BRCA_ctrl	BRCA_cancer	HSPA14	10.8855	16.5434	0.569348	4.75555e-19	6.41303	11.884	0.88982	1.05974e-33	0.589	0.71	0.121	3.65033e-15	3.65033e-15	FALSE	0.999993	TRUE	no	yes	NA	0
uc001iqt.2	chr10:21823102..22032555,+	BRCA_ctrl	BRCA_cancer	MLLT10	10.9802	9.90229	-0.387097	1.37336e-11	1.91162	1.56696	-0.286655	0.0988638	0.171	0.154	-0.017	1	6.01026e-15	FALSE	1	TRUE	no	yes	NA	0
uc001iqu.1	chr10:21823102..22032555,+	BRCA_ctrl	BRCA_cancer	MLLT10	10.9802	9.90229	-0.387097	1.37336e-11	1.54201	2.82745	0.872849	6.87565e-21	0.149	0.279	0.131	6.01026e-15	6.01026e-15	FALSE	0.32942	FALSE	no	yes	NA	0
uc001iqy.2	chr10:21823102..22032555,+	BRCA_ctrl	BRCA_cancer	MLLT10	10.9802	9.90229	-0.387097	1.37336e-11	1.11213	0.391854	-1.50379	8.64721e-11	0.099	0.042	-0.056	1	6.01026e-15	FALSE	1	TRUE	no	yes	NA	0
uc001ira.2	chr10:21823102..22032555,+	BRCA_ctrl	BRCA_cancer	MLLT10	10.9802	9.90229	-0.387097	1.37336e-11	3.9468	3.18683	-0.308475	2.49764e-05	0.363	0.327	-0.036	1	6.01026e-15	FALSE	0.999992	TRUE	no	no	NA	0
uc001ivi.1	chr10:30722866..30750761,+	BRCA_ctrl	BRCA_cancer	MAP3K8	9.08472	3.78999	-1.22967	2.15421e-38	4.60406	2.29339	-1.00507	8.21466e-24	0.509	0.632	0.123	2.37404e-11	2.37404e-11	FALSE	0.99999	TRUE	no	yes	FALSE	0
uc001ivj.1	chr10:30722866..30750761,+	BRCA_ctrl	BRCA_cancer	MAP3K8	9.08472	3.78999	-1.22967	2.15421e-38	4.10851	1.28592	-1.67508	3.89565e-34	0.449	0.309	-0.14	5.63053e-10	2.37404e-11	FALSE	0.999991	TRUE	no	yes	FALSE	0
uc001ixv.2	chr10:35298808..35379546,-	BRCA_ctrl	BRCA_cancer	CUL2	14.2492	15.6138	0.128166	0.0181535	7.5517	5.9326	-0.347958	0.00358351	0.521	0.37	-0.151	2.67456e-09	2.67456e-09	FALSE	1	TRUE	no	yes	NA	0
uc001ixw.2	chr10:35298808..35379546,-	BRCA_ctrl	BRCA_cancer	CUL2	14.2492	15.6138	0.128166	0.0181535	5.7085	7.26833	0.348615	0.00316953	0.396	0.446	0.05	1	2.67456e-09	FALSE	1	TRUE	no	yes	NA	0
uc010qer.1	chr10:35298808..35379546,-	BRCA_ctrl	BRCA_cancer	CUL2	14.2492	15.6138	0.128166	0.0181535	0.982894	2.40475	1.29003	0.0130724	0.083	0.183	0.1	1	2.67456e-09	FALSE	1	TRUE	no	yes	NA	0
uc001ixx.2	chr10:35415801..35501885,+	BRCA_ctrl	BRCA_cancer	CREM	9.65183	9.69704	-0.029207	0.675025	2.07726	2.95803	0.50935	8.5266e-13	0.221	0.309	0.088	1	1.75385e-13	FALSE	0.597621	TRUE	no	yes	NA	0
uc001iyd.2	chr10:35415801..35501885,+	BRCA_ctrl	BRCA_cancer	CREM	9.65183	9.69704	-0.029207	0.675025	1.01601	1.31109	0.367352	7.47571e-05	0.115	0.139	0.024	1	1.75385e-13	FALSE	0.997367	TRUE	no	yes	NA	0
uc001iye.2	chr10:35415801..35501885,+	BRCA_ctrl	BRCA_cancer	CREM	9.65183	9.69704	-0.029207	0.675025	1.33189	1.81456	0.446274	5.84791e-08	0.151	0.196	0.045	1	1.75385e-13	FALSE	0.981291	TRUE	no	yes	NA	0
uc001iyr.2	chr10:35415801..35501885,+	BRCA_ctrl	BRCA_cancer	CREM	9.65183	9.69704	-0.029207	0.675025	2.34055	1.01235	-1.20834	8.92878e-26	0.235	0.108	-0.127	1.75385e-13	1.75385e-13	FALSE	0.649997	TRUE	no	yes	NA	0
uc009xmj.2	chr10:44051795..44070066,-	BRCA_ctrl	BRCA_cancer	ZNF239	3.0982	6.47148	1.09288	1.12444e-34	0.967655	2.03029	1.06801	1.87516e-07	0.31	0.312	0.003	1	0.000106457	FALSE	0.999976	TRUE	no	yes	NA	0
uc009xmk.2	chr10:44051795..44070066,-	BRCA_ctrl	BRCA_cancer	ZNF239	3.0982	6.47148	1.09288	1.12444e-34	1.77489	2.85296	0.683916	6.66147e-09	0.577	0.471	-0.106	0.000106457	0.000106457	FALSE	0.999976	TRUE	no	yes	NA	0
uc001jbf.2	chr10:44865607..44880542,-	BRCA_ctrl	BRCA_cancer	CXCL12	232.491	50.9622	-2.01046	1.91719e-116	29.0453	15.1326	-0.940612	1.18595e-23	0.131	0.32	0.189	4.34457e-17	4.34457e-17	FALSE	0.689721	TRUE	yes	yes	FALSE	0
uc001jbh.2	chr10:44865607..44880542,-	BRCA_ctrl	BRCA_cancer	CXCL12	232.491	50.9622	-2.01046	1.91719e-116	5.15998	1.11894	-2.19951	4.21023e-57	0.022	0.024	0.002	1	4.34457e-17	FALSE	0.805512	TRUE	yes	yes	FALSE	0
uc001jbi.2	chr10:44865607..44880542,-	BRCA_ctrl	BRCA_cancer	CXCL12	232.491	50.9622	-2.01046	1.91719e-116	198.286	34.7107	-2.51409	6.02193e-166	0.846	0.655	-0.191	4.34457e-17	4.34457e-17	FALSE	0.701302	TRUE	yes	yes	FALSE	0
uc001jem.2	chr10:47746920..47770843,+	BRCA_ctrl	BRCA_cancer	ANXA8L2	6.47742	3.32404	-0.963908	3.6477e-05	5.9963	2.82297	-1.08655	0.000433637	0.793	0.587	-0.207	0.000212671	0.000212671	FALSE	0.999956	TRUE	no	yes	NA	0
uc009xif.2	chr10:5903691..5931860,-	BRCA_ctrl	BRCA_cancer	ANKRD16	3.50465	4.93277	0.307612	3.23178e-07	1.17688	2.95347	1.32659	8.57623e-31	0.339	0.576	0.236	1.01201e-12	1.01201e-12	FALSE	0.999936	TRUE	no	yes	FALSE	0
uc010qat.1	chr10:5903691..5931860,-	BRCA_ctrl	BRCA_cancer	ANKRD16	3.50465	4.93277	0.307612	3.23178e-07	1.7224	1.25344	-0.458489	1.92847e-07	0.485	0.276	-0.208	4.53541e-11	1.01201e-12	FALSE	0.999932	TRUE	no	yes	FALSE	0
uc001iiv.2	chr10:5990859..6020142,-	BRCA_ctrl	BRCA_cancer	IL15RA	9.19276	6.2172	-0.575521	1.20885e-09	3.50307	3.07246	-0.188943	0.179201	0.368	0.473	0.105	1.09499e-07	1.09499e-07	FALSE	0.992317	TRUE	yes	no	NA	0
uc001iiw.2	chr10:5990859..6020142,-	BRCA_ctrl	BRCA_cancer	IL15RA	9.19276	6.2172	-0.575521	1.20885e-09	1.49673	0.540203	-1.46816	1.47785e-10	0.17	0.096	-0.074	1	1.09499e-07	FALSE	0.971838	TRUE	no	no	NA	0
uc010qau.1	chr10:5990859..6020142,-	BRCA_ctrl	BRCA_cancer	IL15RA	9.19276	6.2172	-0.575521	1.20885e-09	2.18845	1.71893	-0.348113	0.0184247	0.241	0.27	0.029	1	1.09499e-07	FALSE	0.98455	TRUE	yes	no	NA	0
uc001joi.2	chr10:70242098..70287584,-	BRCA_ctrl	BRCA_cancer	SLC25A16	10.5219	6.54418	-0.70515	9.23113e-24	7.01035	2.93512	-1.25554	1.42509e-30	0.648	0.452	-0.196	8.54279e-10	8.54279e-10	FALSE	0.995199	TRUE	no	yes	NA	0
uc010qix.1	chr10:70242098..70287584,-	BRCA_ctrl	BRCA_cancer	SLC25A16	10.5219	6.54418	-0.70515	9.23113e-24	3.20217	2.6533	-0.270961	0.00256346	0.323	0.409	0.086	1	8.54279e-10	FALSE	0.699964	TRUE	no	yes	NA	0
uc001jry.2	chr10:73156704..73575702,+	BRCA_ctrl	BRCA_cancer	CDH23	5.46313	1.54487	-2.19227	1.46472e-91	1.56619	0.582303	-1.42618	8.5939e-35	0.263	0.391	0.128	1.14398e-13	1.14398e-13	FALSE	1	TRUE	no	yes	NA	0
uc001jue.2	chr10:75196564..75255782,-	BRCA_ctrl	BRCA_cancer	PPP3CB	37.7892	25.7342	-0.652417	2.38802e-43	7.64473	2.79811	-1.4497	2.6514e-11	0.19	0.102	-0.089	1	2.37952e-13	FALSE	0.999994	TRUE	no	yes	NA	0
uc001juf.2	chr10:75196564..75255782,-	BRCA_ctrl	BRCA_cancer	PPP3CB	37.7892	25.7342	-0.652417	2.38802e-43	1.91008	0.785792	-1.27989	6.02257e-09	0.034	0.029	-0.005	1	2.37952e-13	FALSE	0.999995	TRUE	no	yes	NA	0
uc001jug.2	chr10:75196564..75255782,-	BRCA_ctrl	BRCA_cancer	PPP3CB	37.7892	25.7342	-0.652417	2.38802e-43	10.4916	3.67021	-1.515	1.39128e-47	0.281	0.142	-0.139	2.37952e-13	2.37952e-13	FALSE	0.99999	TRUE	no	yes	NA	0
uc001juh.2	chr10:75196564..75255782,-	BRCA_ctrl	BRCA_cancer	PPP3CB	37.7892	25.7342	-0.652417	2.38802e-43	6.09891	7.35266	0.269787	0.000360973	0.18	0.281	0.1	1	2.37952e-13	FALSE	0.999181	TRUE	no	yes	NA	0
uc001jui.2	chr10:75196564..75255782,-	BRCA_ctrl	BRCA_cancer	PPP3CB	37.7892	25.7342	-0.652417	2.38802e-43	1.82387	3.30324	0.856078	4.2145e-16	0.058	0.13	0.072	1	2.37952e-13	FALSE	0.999988	TRUE	no	yes	NA	0
uc010qkj.1	chr10:75196564..75255782,-	BRCA_ctrl	BRCA_cancer	PPP3CB	37.7892	25.7342	-0.652417	2.38802e-43	9.81994	7.82418	-0.327408	3.8606e-05	0.256	0.316	0.06	1	2.37952e-13	FALSE	0.708477	TRUE	no	no	NA	0
uc001jwa.2	chr10:75670862..75677256,+	BRCA_ctrl	BRCA_cancer	PLAU	17.5142	42.21	1.27641	2.8108e-23	0.453814	9.06054	4.31652	8.59636e-11	0.028	0.163	0.135	1.57765e-06	1.57765e-06	FALSE	0.999958	TRUE	yes	yes	FALSE	0
uc001jwc.2	chr10:75670862..75677256,+	BRCA_ctrl	BRCA_cancer	PLAU	17.5142	42.21	1.27641	2.8108e-23	16.5707	31.8811	0.944022	1.44911e-13	0.941	0.808	-0.133	0.000237356	1.57765e-06	FALSE	0.999959	TRUE	yes	yes	FALSE	0
uc001iju.2	chr10:7830093..7849755,+	BRCA_ctrl	BRCA_cancer	ATP5C1	118.993	154.186	0.386486	1.29603e-10	66.9926	130.963	0.967014	1.04028e-40	0.598	0.83	0.233	2.34847e-14	2.34847e-14	FALSE	0.998716	TRUE	no	yes	FALSE	0
uc001ijv.2	chr10:7830093..7849755,+	BRCA_ctrl	BRCA_cancer	ATP5C1	118.993	154.186	0.386486	1.29603e-10	48.1525	17.3078	-1.47596	1.99921e-99	0.368	0.13	-0.238	2.5e-14	2.34847e-14	FALSE	0.998272	TRUE	no	yes	FALSE	0
uc009xiq.1	chr10:7830093..7849755,+	BRCA_ctrl	BRCA_cancer	ATP5C1	118.993	154.186	0.386486	1.29603e-10	1.48065	2.59376	0.808422	0.00405075	0.013	0.018	0.005	1	2.34847e-14	FALSE	0.998312	TRUE	no	yes	FALSE	0
uc010qbc.1	chr10:7830093..7849755,+	BRCA_ctrl	BRCA_cancer	ATP5C1	118.993	154.186	0.386486	1.29603e-10	1.77481	2.77605	0.643953	2.08737e-07	0.016	0.018	0.002	1	2.34847e-14	FALSE	0.993404	TRUE	no	yes	FALSE	0
uc001jxm.2	chr10:78629359..79397577,-	BRCA_ctrl	BRCA_cancer	KCNMA1	11.2742	10.4007	-0.525518	0.000244999	8.29585	5.42267	-0.613365	3.69191e-05	0.737	0.521	-0.215	4.66654e-09	3.55985e-10	FALSE	1	TRUE	no	yes	TRUE	0
uc001jxs.3	chr10:78629359..79397577,-	BRCA_ctrl	BRCA_cancer	KCNMA1	11.2742	10.4007	-0.525518	0.000244999	1.62032	3.32585	1.03625	1.44158e-08	0.145	0.323	0.177	3.55985e-10	3.55985e-10	FALSE	0.893734	TRUE	no	no	TRUE	0
uc001jxt.3	chr10:78629359..79397577,-	BRCA_ctrl	BRCA_cancer	KCNMA1	11.2742	10.4007	-0.525518	0.000244999	0.691177	1.21731	0.814	1.49539e-05	0.065	0.121	0.056	1	3.55985e-10	FALSE	0.800653	TRUE	no	no	TRUE	0
uc001jzp.2	chr10:79793518..79816570,+	BRCA_ctrl	BRCA_cancer	RPS24	1584.47	1453.88	-0.138301	0.0630313	1391.52	909.248	-0.613916	5.07308e-16	0.885	0.652	-0.233	4.28456e-15	2.80705e-16	FALSE	0.623029	TRUE	no	yes	FALSE	0
uc001jzq.2	chr10:79793518..79816570,+	BRCA_ctrl	BRCA_cancer	RPS24	1584.47	1453.88	-0.138301	0.0630313	155.538	535.089	1.78248	1.33913e-34	0.092	0.342	0.25	2.80705e-16	2.80705e-16	FALSE	0.761205	TRUE	no	yes	FALSE	0
uc010qlo.1	chr10:79793518..79816570,+	BRCA_ctrl	BRCA_cancer	RPS24	1584.47	1453.88	-0.138301	0.0630313	35.8719	8.17229	-2.13358	0.00021508	0.022	0.005	-0.017	1	2.80705e-16	FALSE	0.62053	TRUE	no	yes	FALSE	0
uc001kbl.2	chr10:81838426..81852306,+	BRCA_ctrl	BRCA_cancer	C10orf57	25.6026	38.1346	0.573824	1.1955e-15	17.1513	19.5555	0.18928	0.0508888	0.678	0.524	-0.154	1.93231e-09	1.93231e-09	FALSE	0.325686	FALSE	no	yes	NA	0
uc001kbo.3	chr10:81838426..81852306,+	BRCA_ctrl	BRCA_cancer	C10orf57	25.6026	38.1346	0.573824	1.1955e-15	1.25442	4.39261	1.80712	0.00772059	0.041	0.11	0.068	1	1.93231e-09	NA	0.0192348	FALSE	NA	NA	NA	0
uc010qlv.1	chr10:81838426..81852306,+	BRCA_ctrl	BRCA_cancer	C10orf57	25.6026	38.1346	0.573824	1.1955e-15	1.0869	1.7136	0.655816	3.70478e-05	0.042	0.044	0.002	1	1.93231e-09	FALSE	0.365051	TRUE	no	yes	NA	0
uc010qlw.1	chr10:81838426..81852306,+	BRCA_ctrl	BRCA_cancer	C10orf57	25.6026	38.1346	0.573824	1.1955e-15	5.09449	10.5761	1.05349	3.6214e-12	0.197	0.272	0.075	1	1.93231e-09	FALSE	0.598333	TRUE	no	yes	NA	0
uc001kcc.3	chr10:82168242..82196869,+	BRCA_ctrl	BRCA_cancer	C10orf58	151.86	62.5672	-1.23075	4.33539e-63	52.487	32.2554	-0.702343	4.68097e-16	0.41	0.527	0.117	6.3186e-09	6.3186e-09	FALSE	0.988545	TRUE	no	yes	FALSE	0
uc001kcd.3	chr10:82168242..82196869,+	BRCA_ctrl	BRCA_cancer	C10orf58	151.86	62.5672	-1.23075	4.33539e-63	25.1779	17.2087	-0.548918	6.1544e-05	0.191	0.278	0.087	1	6.3186e-09	FALSE	0.981448	TRUE	no	yes	FALSE	0
uc001kce.3	chr10:82168242..82196869,+	BRCA_ctrl	BRCA_cancer	C10orf58	151.86	62.5672	-1.23075	4.33539e-63	52.3388	5.79323	-3.17516	1.43019e-18	0.242	0.077	-0.165	9.32994e-09	6.3186e-09	FALSE	0.988624	TRUE	no	yes	FALSE	0
uc001kcf.3	chr10:82168242..82196869,+	BRCA_ctrl	BRCA_cancer	C10orf58	151.86	62.5672	-1.23075	4.33539e-63	2.11413	0.953317	-1.14747	2.25158e-34	0.015	0.016	0	1	6.3186e-09	FALSE	0.988331	TRUE	no	yes	FALSE	0
uc001kcg.3	chr10:82168242..82196869,+	BRCA_ctrl	BRCA_cancer	C10orf58	151.86	62.5672	-1.23075	4.33539e-63	19.7424	6.35663	-1.63457	4.88453e-90	0.142	0.103	-0.04	1	6.3186e-09	NA	0.0134024	FALSE	NA	NA	FALSE	0
uc001kdg.1	chr10:86088410..86278276,+	BRCA_ctrl	BRCA_cancer	FAM190B	15.5745	9.5374	-0.697234	1.43087e-35	1.48501	1	-0.569553	1.06812e-06	0.092	0.104	0.011	1	2.46139e-15	FALSE	0.999997	TRUE	no	no	TRUE	0
uc001kdi.1	chr10:86088410..86278276,+	BRCA_ctrl	BRCA_cancer	FAM190B	15.5745	9.5374	-0.697234	1.43087e-35	1.73508	2.20638	0.346385	0.0151648	0.139	0.259	0.12	1	2.46139e-15	FALSE	0.830097	TRUE	no	no	TRUE	0
uc010qmd.1	chr10:86088410..86278276,+	BRCA_ctrl	BRCA_cancer	FAM190B	15.5745	9.5374	-0.697234	1.43087e-35	5.13497	3.96477	-0.373071	0.00220753	0.336	0.398	0.062	1	2.46139e-15	FALSE	1	TRUE	no	no	TRUE	0
uc010qme.1	chr10:86088410..86278276,+	BRCA_ctrl	BRCA_cancer	FAM190B	15.5745	9.5374	-0.697234	1.43087e-35	6.85886	2.36543	-1.53557	8.13301e-70	0.419	0.239	-0.179	2.46139e-15	2.46139e-15	FALSE	0.979555	TRUE	no	no	TRUE	0
uc001khg.2	chr10:92922775..93044020,+	BRCA_ctrl	BRCA_cancer	PCGF5	18.3887	16.2729	-0.825633	5.79847e-44	6.32635	10.4855	0.72919	7.57156e-19	0.351	0.63	0.278	4.62266e-17	4.62266e-17	NA	0.00809934	FALSE	NA	NA	TRUE	0
uc001khh.2	chr10:92922775..93044020,+	BRCA_ctrl	BRCA_cancer	PCGF5	18.3887	16.2729	-0.825633	5.79847e-44	11.3909	3.54367	-1.68447	1.06307e-23	0.611	0.226	-0.385	5.41728e-17	4.62266e-17	FALSE	0.932393	TRUE	no	yes	TRUE	0
uc001khi.2	chr10:92922775..93044020,+	BRCA_ctrl	BRCA_cancer	PCGF5	18.3887	16.2729	-0.825633	5.79847e-44	0.661372	2.23518	1.75652	3.6335e-10	0.038	0.144	0.106	1	4.62266e-17	FALSE	0.931774	TRUE	no	yes	TRUE	0
uc001kin.2	chr10:95066187..95242074,-	BRCA_ctrl	BRCA_cancer	MYOF	53.5915	40.7742	-0.424317	2.74339e-08	23.4309	7.94262	-1.56068	1.79268e-30	0.436	0.196	-0.241	6.0789e-16	6.0789e-16	FALSE	1	TRUE	no	yes	TRUE	0
uc001kio.2	chr10:95066187..95242074,-	BRCA_ctrl	BRCA_cancer	MYOF	53.5915	40.7742	-0.424317	2.74339e-08	9.69542	14.0982	0.5401	0.000220983	0.169	0.306	0.137	6.78804e-14	6.0789e-16	FALSE	1	TRUE	no	yes	TRUE	0
uc009xue.2	chr10:95066187..95242074,-	BRCA_ctrl	BRCA_cancer	MYOF	53.5915	40.7742	-0.424317	2.74339e-08	19.3928	18.2234	-0.0897535	0.223712	0.376	0.488	0.112	1	6.0789e-16	NA	1	TRUE	NA	NA	TRUE	0
uc001kjj.2	chr10:95653730..95713998,+	BRCA_ctrl	BRCA_cancer	TMEM20	2.07079	1.11132	-0.974846	4.85168e-25	1.16725	0.403741	-1.52916	1.17019e-49	0.544	0.364	-0.179	1.10952e-10	1.10952e-10	NA	0.0108646	FALSE	NA	NA	NA	0
uc001kky.2	chr10:97365687..97416567,-	BRCA_ctrl	BRCA_cancer	ALDH18A1	21.6541	41.958	0.929007	2.23577e-57	3.13316	9.2501	1.56157	1.13617e-24	0.139	0.223	0.084	1	9.64638e-10	FALSE	1	TRUE	no	yes	TRUE	0
uc001kkz.2	chr10:97365687..97416567,-	BRCA_ctrl	BRCA_cancer	ALDH18A1	21.6541	41.958	0.929007	2.23577e-57	15.5676	21.8425	0.488578	0.000192397	0.719	0.52	-0.199	9.64638e-10	9.64638e-10	FALSE	1	TRUE	no	yes	TRUE	0
uc010qoh.1	chr10:97365687..97416567,-	BRCA_ctrl	BRCA_cancer	ALDH18A1	21.6541	41.958	0.929007	2.23577e-57	2.60279	10.3329	1.98869	2.2995e-16	0.125	0.244	0.119	1	9.64638e-10	FALSE	1	TRUE	no	yes	TRUE	0
uc001kle.1	chr10:97471536..97637022,+	BRCA_ctrl	BRCA_cancer	ENTPD1	6.10189	6.20221	-0.0712368	0.246449	1.05145	1.4639	0.477407	0.0117455	0.153	0.194	0.041	1	1.12295e-06	FALSE	0.997315	TRUE	no	yes	NA	0
uc001klh.3	chr10:97471536..97637022,+	BRCA_ctrl	BRCA_cancer	ENTPD1	6.10189	6.20221	-0.0712368	0.246449	2.84333	3.54058	0.316382	0.282098	0.431	0.531	0.1	1	1.12295e-06	FALSE	0.999996	TRUE	no	yes	NA	0
uc010qoj.1	chr10:97471536..97637022,+	BRCA_ctrl	BRCA_cancer	ENTPD1	6.10189	6.20221	-0.0712368	0.246449	1.87862	0.920387	-1.02924	0.0105018	0.348	0.213	-0.135	1.12295e-06	1.12295e-06	FALSE	0.999996	TRUE	no	yes	NA	0
uc001kls.3	chr10:97951463..98031333,-	BRCA_ctrl	BRCA_cancer	BLNK	4.94292	9.28912	0.903018	3.1227e-23	3.82342	6.231	0.704087	7.1808e-09	0.756	0.663	-0.093	1	1.37493e-11	FALSE	0.999982	TRUE	no	yes	NA	0
uc001klx.3	chr10:97951463..98031333,-	BRCA_ctrl	BRCA_cancer	BLNK	4.94292	9.28912	0.903018	3.1227e-23	0.612743	2.36739	1.94654	3.53328e-20	0.106	0.242	0.136	1.37493e-11	1.37493e-11	FALSE	0.999969	TRUE	no	yes	NA	0
uc001kna.2	chr10:98912804..99052413,-	BRCA_ctrl	BRCA_cancer	ARHGAP19	9.16242	4.27813	-1.12734	1.23181e-95	5.86431	0.895397	-2.71079	7.91124e-25	0.546	0.183	-0.363	3.64723e-10	3.64723e-10	FALSE	0.999989	TRUE	no	yes	TRUE	0
uc001knb.2	chr10:98912804..99052413,-	BRCA_ctrl	BRCA_cancer	ARHGAP19	9.16242	4.27813	-1.12734	1.23181e-95	1.365	1.5534	0.18657	0.60049	0.202	0.338	0.136	2.84321e-08	3.64723e-10	FALSE	0.999993	TRUE	no	yes	TRUE	0
uc009xvk.2	chr10:98912804..99052413,-	BRCA_ctrl	BRCA_cancer	ARHGAP19	9.16242	4.27813	-1.12734	1.23181e-95	1.60542	1.54146	-0.0587281	0.787034	0.213	0.405	0.192	1	3.64723e-10	FALSE	0.991486	TRUE	no	yes	TRUE	0
uc001kot.1	chr10:99624758..99790585,-	BRCA_ctrl	BRCA_cancer	CRTAC1	3.27835	1.35189	-1.30588	1.20428e-10	1.28186	0.561496	-1.18976	2.77824e-09	0.419	0.614	0.195	5.4817e-06	2.15289e-06	FALSE	0.999997	TRUE	no	yes	TRUE	0
uc001kou.1	chr10:99624758..99790585,-	BRCA_ctrl	BRCA_cancer	CRTAC1	3.27835	1.35189	-1.30588	1.20428e-10	1.84065	0.675449	-1.44531	7.68963e-07	0.53	0.321	-0.209	2.15289e-06	2.15289e-06	FALSE	1	TRUE	yes	yes	TRUE	0
uc001miw.2	chr11:10594638..10715535,-	BRCA_ctrl	BRCA_cancer	MRVI1	7.02788	3.06189	-1.20252	1.44116e-48	3.40698	1.20545	-1.4986	4.94753e-10	0.483	0.337	-0.146	0.00143081	0.00143081	FALSE	1	TRUE	no	yes	NA	0
uc010rcd.1	chr11:10594638..10715535,-	BRCA_ctrl	BRCA_cancer	MRVI1	7.02788	3.06189	-1.20252	1.44116e-48	1.64764	0.903995	-0.865997	6.69301e-13	0.251	0.346	0.095	1	0.00143081	FALSE	1	TRUE	no	yes	NA	0
uc001plw.1	chr11:111597632..111637169,-	BRCA_ctrl	BRCA_cancer	PPP2R1B	30.3929	7.69515	-1.57999	4.76799e-136	18.2626	2.06719	-3.14236	1.03723e-125	0.502	0.242	-0.26	2.07437e-12	2.07437e-12	FALSE	1	TRUE	no	yes	FALSE	0
uc001plx.1	chr11:111597632..111637169,-	BRCA_ctrl	BRCA_cancer	PPP2R1B	30.3929	7.69515	-1.57999	4.76799e-136	10.4564	4.87438	-1.10096	9.04332e-34	0.436	0.637	0.201	2.46442e-11	2.07437e-12	FALSE	1	TRUE	no	yes	FALSE	0
uc001pml.2	chr11:111800585..111893305,+	BRCA_ctrl	BRCA_cancer	DIXDC1	19.9724	7.20681	-1.56835	2.33286e-105	1.73727	1.03514	-0.746622	2.67275e-05	0.085	0.13	0.045	1	1.67472e-13	FALSE	1	TRUE	no	yes	NA	0
uc001pmm.2	chr11:111800585..111893305,+	BRCA_ctrl	BRCA_cancer	DIXDC1	19.9724	7.20681	-1.56835	2.33286e-105	4.70073	0.871892	-2.43005	1.17153e-65	0.227	0.108	-0.119	1.67472e-13	1.67472e-13	FALSE	0.999995	TRUE	no	yes	NA	0
uc001pmn.2	chr11:111800585..111893305,+	BRCA_ctrl	BRCA_cancer	DIXDC1	19.9724	7.20681	-1.56835	2.33286e-105	4.13377	1.13201	-1.86809	3.36103e-23	0.209	0.137	-0.072	1	1.67472e-13	FALSE	0.999961	TRUE	no	yes	NA	1
uc010rwq.1	chr11:111800585..111893305,+	BRCA_ctrl	BRCA_cancer	DIXDC1	19.9724	7.20681	-1.56835	2.33286e-105	8.35432	3.07289	-1.44268	5.58103e-86	0.418	0.46	0.042	1	1.67472e-13	FALSE	0.999783	TRUE	no	yes	NA	0
uc001pnb.1	chr11:112013976..112034840,-	BRCA_ctrl	BRCA_cancer	IL18	3.75273	8.58326	1.17709	1.17491e-21	2.54958	6.93003	1.44182	8.61421e-08	0.589	0.707	0.118	0.00124064	0.00124064	FALSE	0.805157	TRUE	no	yes	NA	0
uc001pnr.2	chr11:112831995..113149157,+	BRCA_ctrl	BRCA_cancer	NCAM1	3.49219	1.17545	-1.60671	6.1839e-24	1.42378	0.401434	-1.82561	1.5203e-12	0.406	0.228	-0.178	4.36466e-07	4.36466e-07	NA	1	TRUE	NA	NA	TRUE	0
uc001pns.2	chr11:112831995..113149157,+	BRCA_ctrl	BRCA_cancer	NCAM1	3.49219	1.17545	-1.60671	6.1839e-24	1.34943	0.496692	-1.44106	4.36623e-15	0.406	0.52	0.114	0.000483101	4.36466e-07	FALSE	0.999213	TRUE	no	yes	TRUE	0
uc001pop.2	chr11:113930431..114121394,+	BRCA_ctrl	BRCA_cancer	ZBTB16	11.185	1.16887	-3.26789	5.45679e-90	10.5108	0.919293	-3.51392	2.11029e-53	0.897	0.582	-0.315	8.04794e-06	8.04794e-06	FALSE	1	TRUE	no	yes	NA	0
uc001pph.3	chr11:115039953..115375241,-	BRCA_ctrl	BRCA_cancer	CADM1	10.5155	12.5982	0.123185	0.328587	0.992319	1.80848	0.865032	4.07757e-06	0.082	0.152	0.07	1	2.60162e-08	FALSE	0.984718	TRUE	no	yes	NA	0
uc001ppi.3	chr11:115039953..115375241,-	BRCA_ctrl	BRCA_cancer	CADM1	10.5155	12.5982	0.123185	0.328587	8.56203	8.37961	-0.0311242	0.859598	0.822	0.672	-0.149	2.60162e-08	2.60162e-08	FALSE	0.999992	TRUE	yes	yes	NA	0
uc001ppl.2	chr11:115039953..115375241,-	BRCA_ctrl	BRCA_cancer	CADM1	10.5155	12.5982	0.123185	0.328587	0.718858	2.20504	1.61453	1.04877e-10	0.07	0.16	0.089	1	2.60162e-08	FALSE	0.999741	TRUE	yes	yes	NA	0
uc001pqt.2	chr11:117103404..117156402,+	BRCA_ctrl	BRCA_cancer	RNF214	8.06104	5.54971	-0.550506	5.58137e-35	5.86215	3.47468	-0.754231	1.85496e-17	0.728	0.61	-0.118	0.000514087	0.000514087	FALSE	1	TRUE	no	no	NA	0
uc001pqu.2	chr11:117103404..117156402,+	BRCA_ctrl	BRCA_cancer	RNF214	8.06104	5.54971	-0.550506	5.58137e-35	1.50255	1.3232	-0.183053	0.451297	0.185	0.252	0.067	1	0.000514087	FALSE	1	TRUE	no	no	NA	0
uc001prs.1	chr11:117771360..117800115,-	BRCA_ctrl	BRCA_cancer	TMPRSS13	5.60175	8.11658	0.447154	0.000618145	4.51358	5.03503	0.157655	0.388853	0.717	0.627	-0.09	1	1.58755e-10	FALSE	1	TRUE	no	yes	NA	0
uc001pru.1	chr11:117771360..117800115,-	BRCA_ctrl	BRCA_cancer	TMPRSS13	5.60175	8.11658	0.447154	0.000618145	0.755327	2.22762	1.55859	2.33669e-17	0.128	0.264	0.136	1.58755e-10	1.58755e-10	FALSE	0.999992	TRUE	no	yes	NA	0
uc001pul.2	chr11:118868852..118886454,+	BRCA_ctrl	BRCA_cancer	CCDC84	4.12507	3.80923	-0.119776	0.114175	1.36083	1.71508	0.333188	0.0172957	0.342	0.476	0.134	1.43058e-07	6.92692e-08	FALSE	0.999404	TRUE	no	yes	TRUE	0
uc010ryl.1	chr11:118868852..118886454,+	BRCA_ctrl	BRCA_cancer	CCDC84	4.12507	3.80923	-0.119776	0.114175	2.49889	1.85099	-0.433684	0.000535207	0.594	0.46	-0.135	6.92692e-08	6.92692e-08	NA	0.989786	TRUE	NA	NA	TRUE	0
uc001pwm.3	chr11:119225926..119252436,-	BRCA_ctrl	BRCA_cancer	USP2	3.25147	1.13245	-1.63329	3.24487e-48	1.89496	0.27978	-2.75614	2.03134e-97	0.511	0.274	-0.238	4.47954e-12	4.47954e-12	FALSE	1	TRUE	no	yes	NA	0
uc010rzm.1	chr11:120196016..120204388,+	BRCA_ctrl	BRCA_cancer	TMEM136	2.82114	2.93093	-0.121262	0.087576	0.663761	1.0868	0.706586	4.46833e-09	0.229	0.353	0.125	1.80428e-07	1.80428e-07	FALSE	0.488395	TRUE	no	no	NA	0
uc001qcg.3	chr11:125495036..125546148,+	BRCA_ctrl	BRCA_cancer	CHEK1	1.9869	6.21524	1.40009	1.0722e-39	0.138761	2.44655	4.13015	1.5406e-29	0.041	0.3	0.259	6.88273e-16	6.88273e-16	FALSE	0.999941	TRUE	no	yes	NA	0
uc001qcj.2	chr11:125495036..125546148,+	BRCA_ctrl	BRCA_cancer	CHEK1	1.9869	6.21524	1.40009	1.0722e-39	0.211389	1.1317	2.40229	3.14341e-41	0.089	0.167	0.078	1	6.88273e-16	FALSE	0.208384	FALSE	no	no	NA	0
uc001qds.2	chr11:126225579..126310752,+	BRCA_ctrl	BRCA_cancer	ST3GAL4	10.5617	20.993	0.984186	4.02961e-24	2.61239	7.87891	1.59221	6.36028e-06	0.217	0.347	0.131	6.48544e-06	1.72746e-07	FALSE	0.999957	TRUE	yes	yes	FALSE	0
uc001qdv.2	chr11:126225579..126310752,+	BRCA_ctrl	BRCA_cancer	ST3GAL4	10.5617	20.993	0.984186	4.02961e-24	5.23402	5.92538	0.178999	0.273274	0.528	0.323	-0.205	1.72746e-07	1.72746e-07	FALSE	0.999957	TRUE	yes	yes	FALSE	0
uc001qdz.2	chr11:126225579..126310752,+	BRCA_ctrl	BRCA_cancer	ST3GAL4	10.5617	20.993	0.984186	4.02961e-24	0.701354	2.00869	1.51577	5.90113e-07	0.064	0.094	0.029	1	1.72746e-07	FALSE	0.991397	TRUE	no	yes	FALSE	0
uc009zce.2	chr11:126225579..126310752,+	BRCA_ctrl	BRCA_cancer	ST3GAL4	10.5617	20.993	0.984186	4.02961e-24	1.51878	4.17534	1.45825	2.72696e-11	0.138	0.185	0.047	1	1.72746e-07	FALSE	0.999951	TRUE	yes	yes	FALSE	0
uc001qez.2	chr11:128834956..129062093,-	BRCA_ctrl	BRCA_cancer	ARHGAP32	7.63754	11.3226	0.560562	1.51628e-08	4.45675	8.44198	0.921521	2.17654e-15	0.588	0.731	0.143	4.64986e-05	4.64986e-05	FALSE	1	TRUE	no	yes	TRUE	0
uc009zcp.2	chr11:128834956..129062093,-	BRCA_ctrl	BRCA_cancer	ARHGAP32	7.63754	11.3226	0.560562	1.51628e-08	2.38595	1.75636	-0.4419	0.044616	0.315	0.179	-0.136	5.98894e-05	4.64986e-05	FALSE	1	TRUE	no	yes	TRUE	0
uc001qgq.2	chr11:131240371..132206715,+	BRCA_ctrl	BRCA_cancer	NTM	4.77827	4.61005	-0.0280546	0.888253	0.361115	2.33028	2.68887	1.075e-37	0.109	0.481	0.373	4.34457e-17	4.34457e-17	FALSE	0.999907	TRUE	yes	yes	TRUE	0
uc001qgr.2	chr11:131240371..132206715,+	BRCA_ctrl	BRCA_cancer	NTM	4.77827	4.61005	-0.0280546	0.888253	0.229451	1.02639	2.15955	1.80098e-19	0.094	0.259	0.165	1	4.34457e-17	FALSE	0.0928876	FALSE	no	yes	TRUE	0
uc010sci.1	chr11:131240371..132206715,+	BRCA_ctrl	BRCA_cancer	NTM	4.77827	4.61005	-0.0280546	0.888253	3.60403	0.8398	-2.10037	1.26578e-22	0.651	0.161	-0.49	4.20889e-15	4.34457e-17	FALSE	0.999881	TRUE	yes	yes	TRUE	0
uc001mln.2	chr11:14665269..14893602,+	BRCA_ctrl	BRCA_cancer	PDE3B	17.115	1.10424	-3.95846	4.17223e-281	16.6083	0.927277	-4.1622	9.38071e-130	0.879	0.673	-0.206	0.0103695	0.0103695	FALSE	1	TRUE	no	yes	NA	0
uc001lud.2	chr11:1848709..1858750,+	BRCA_ctrl	BRCA_cancer	SYT8	7.19227	4.24507	-0.78682	0.00177767	1.17865	0.616348	-0.933856	0.00877303	0.151	0.221	0.07	1	9.30098e-09	FALSE	0.99999	TRUE	no	yes	NA	0
uc001luf.1	chr11:1848709..1858750,+	BRCA_ctrl	BRCA_cancer	SYT8	7.19227	4.24507	-0.78682	0.00177767	4.26398	2.17333	-0.97195	0.00190652	0.606	0.385	-0.221	9.30098e-09	9.30098e-09	FALSE	0.999987	TRUE	no	yes	NA	0
uc010qxb.1	chr11:1848709..1858750,+	BRCA_ctrl	BRCA_cancer	SYT8	7.19227	4.24507	-0.78682	0.00177767	1.29399	0.924064	-0.485318	0.117143	0.167	0.214	0.047	1	9.30098e-09	FALSE	0.680723	TRUE	no	no	NA	1
uc001lui.2	chr11:1874200..1913492,+	BRCA_ctrl	BRCA_cancer	LSP1	40.5818	38.3201	-0.0669917	0.583811	12.1349	28.137	1.21322	1.66685e-16	0.264	0.694	0.43	4.3024e-16	4.34457e-17	FALSE	0.999902	TRUE	no	yes	TRUE	0
uc001luk.2	chr11:1874200..1913492,+	BRCA_ctrl	BRCA_cancer	LSP1	40.5818	38.3201	-0.0669917	0.583811	6.67452	0.953438	-2.8062	4.75459e-50	0.149	0.021	-0.128	4.34457e-17	4.34457e-17	FALSE	0.999213	TRUE	no	yes	TRUE	0
uc001lul.2	chr11:1874200..1913492,+	BRCA_ctrl	BRCA_cancer	LSP1	40.5818	38.3201	-0.0669917	0.583811	2.69619	0.945106	-1.51146	2.70464e-15	0.063	0.022	-0.041	1	4.34457e-17	FALSE	0.999202	TRUE	no	yes	TRUE	0
uc001lum.2	chr11:1874200..1913492,+	BRCA_ctrl	BRCA_cancer	LSP1	40.5818	38.3201	-0.0669917	0.583811	18.8923	8.25428	-1.19445	2.70065e-06	0.519	0.262	-0.257	1.65799e-09	4.34457e-17	FALSE	0.999225	TRUE	no	yes	TRUE	0
uc001loj.3	chr11:214625..236931,-	BRCA_ctrl	BRCA_cancer	SIRT3	25.3631	29.313	-0.108582	0.0726622	5.48571	3.42424	-0.679732	7.99731e-11	0.223	0.124	-0.098	1	1.48776e-14	FALSE	0.998548	TRUE	no	yes	NA	0
uc001lok.3	chr11:214625..236931,-	BRCA_ctrl	BRCA_cancer	SIRT3	25.3631	29.313	-0.108582	0.0726622	2.88088	3.67602	0.351803	0.0066892	0.115	0.13	0.015	1	1.48776e-14	FALSE	0.999958	TRUE	yes	yes	NA	0
uc010qvl.1	chr11:214625..236931,-	BRCA_ctrl	BRCA_cancer	SIRT3	25.3631	29.313	-0.108582	0.0726622	13.9399	19.9847	0.519024	1.94006e-11	0.541	0.666	0.125	1.48776e-14	1.48776e-14	NA	0.0438016	FALSE	NA	NA	NA	0
uc010qvo.1	chr11:214625..236931,-	BRCA_ctrl	BRCA_cancer	SIRT3	25.3631	29.313	-0.108582	0.0726622	1.76137	1.18638	-0.569903	2.47528e-06	0.071	0.043	-0.028	1	1.48776e-14	FALSE	0.999974	TRUE	yes	yes	NA	0
uc001mqw.2	chr11:26580580..26593815,-	BRCA_ctrl	BRCA_cancer	MUC15	6.63562	2.33296	-1.5057	1.05001e-10	4.45079	1.64981	-1.43145	0.000268521	0.636	0.417	-0.219	0.00231871	0.00231871	FALSE	0.999845	TRUE	no	no	TRUE	0
uc001mqx.2	chr11:26580580..26593815,-	BRCA_ctrl	BRCA_cancer	MUC15	6.63562	2.33296	-1.5057	1.05001e-10	1.07697	0.365591	-1.55726	5.54027e-05	0.184	0.267	0.083	1	0.00231871	FALSE	0.996206	TRUE	yes	no	TRUE	0
uc001mqy.2	chr11:26580580..26593815,-	BRCA_ctrl	BRCA_cancer	MUC15	6.63562	2.33296	-1.5057	1.05001e-10	1.10786	0.317558	-1.80095	1.34604e-09	0.18	0.316	0.136	1	0.00231871	FALSE	0.999379	TRUE	no	no	TRUE	0
uc001mre.1	chr11:27062509..27149354,+	BRCA_ctrl	BRCA_cancer	BBOX1	16.3165	3.74983	-2.15904	7.27417e-28	4.24927	0.692324	-2.61573	2.84789e-08	0.218	0.102	-0.115	1.34479e-05	1.34479e-05	FALSE	0.999604	TRUE	no	yes	FALSE	0
uc001mrg.1	chr11:27062509..27149354,+	BRCA_ctrl	BRCA_cancer	BBOX1	16.3165	3.74983	-2.15904	7.27417e-28	2.73958	1.25996	-1.12011	2.26682e-05	0.278	0.439	0.161	0.00131381	1.34479e-05	FALSE	0.999611	TRUE	no	yes	FALSE	0
uc009yih.1	chr11:27062509..27149354,+	BRCA_ctrl	BRCA_cancer	BBOX1	16.3165	3.74983	-2.15904	7.27417e-28	9.32761	1.79755	-2.37475	3.47697e-20	0.505	0.459	-0.046	1	1.34479e-05	FALSE	0.999605	TRUE	no	yes	FALSE	0
uc001mrj.3	chr11:27387510..27494334,-	BRCA_ctrl	BRCA_cancer	LGR4	16.0095	6.49785	-1.30621	2.82071e-33	14.3172	4.04446	-1.82361	3.54836e-13	0.848	0.431	-0.417	3.18028e-09	3.18028e-09	FALSE	1	TRUE	yes	yes	TRUE	0
uc001mrk.3	chr11:27387510..27494334,-	BRCA_ctrl	BRCA_cancer	LGR4	16.0095	6.49785	-1.30621	2.82071e-33	1.69229	2.45339	0.535689	0.0549459	0.152	0.569	0.417	3.18028e-09	3.18028e-09	FALSE	1	TRUE	yes	yes	TRUE	0
uc001mvo.1	chr11:34500342..34535330,-	BRCA_ctrl	BRCA_cancer	ELF5	38.5491	16.2747	-1.25681	8.89163e-08	1.19492	0.450642	-1.40498	0.0156471	0.043	0.012	-0.031	1	0.0317601	FALSE	0.987675	TRUE	no	yes	TRUE	0
uc001mvp.1	chr11:34500342..34535330,-	BRCA_ctrl	BRCA_cancer	ELF5	38.5491	16.2747	-1.25681	8.89163e-08	34.5686	13.9219	-1.31204	1.1281e-06	0.854	0.734	-0.12	1	0.0317601	FALSE	0.985199	TRUE	no	yes	TRUE	0
uc001mvq.1	chr11:34500342..34535330,-	BRCA_ctrl	BRCA_cancer	ELF5	38.5491	16.2747	-1.25681	8.89163e-08	1.41496	0.248924	-2.50206	2.94477e-30	0.033	0.028	-0.006	1	0.0317601	FALSE	0.871372	TRUE	no	yes	TRUE	0
uc009ykd.1	chr11:34500342..34535330,-	BRCA_ctrl	BRCA_cancer	ELF5	38.5491	16.2747	-1.25681	8.89163e-08	1.37061	1.65326	0.270066	0.5889	0.07	0.226	0.156	0.0317601	0.0317601	FALSE	0.401232	TRUE	no	yes	TRUE	0
uc001mvu.2	chr11:35160417..35253946,+	BRCA_ctrl	BRCA_cancer	CD44	89.2735	104.359	0.249446	0.0189434	3.92345	8.01975	1.03132	2.58935e-06	0.043	0.075	0.032	1	2.96336e-09	FALSE	1	TRUE	yes	yes	TRUE	0
uc001mvv.2	chr11:35160417..35253946,+	BRCA_ctrl	BRCA_cancer	CD44	89.2735	104.359	0.249446	0.0189434	15.0215	30.212	1.00805	4.76986e-10	0.165	0.273	0.108	2.96336e-09	2.96336e-09	FALSE	1	TRUE	yes	yes	TRUE	0
uc001mvw.2	chr11:35160417..35253946,+	BRCA_ctrl	BRCA_cancer	CD44	89.2735	104.359	0.249446	0.0189434	23.8594	29.6983	0.31581	0.119725	0.256	0.226	-0.029	1	2.96336e-09	FALSE	0.999994	TRUE	yes	yes	TRUE	0
uc001mvx.2	chr11:35160417..35253946,+	BRCA_ctrl	BRCA_cancer	CD44	89.2735	104.359	0.249446	0.0189434	40.6377	25.9638	-0.646304	1.87386e-13	0.476	0.338	-0.138	0.00193343	2.96336e-09	FALSE	0.99963	TRUE	yes	yes	TRUE	0
uc010res.1	chr11:35160417..35253946,+	BRCA_ctrl	BRCA_cancer	CD44	89.2735	104.359	0.249446	0.0189434	2.22929	3.74261	0.746359	0.000194845	0.024	0.028	0.004	1	2.96336e-09	FALSE	0.6656	TRUE	no	no	TRUE	0
uc010reu.1	chr11:35160417..35253946,+	BRCA_ctrl	BRCA_cancer	CD44	89.2735	104.359	0.249446	0.0189434	2.15443	3.31099	0.618901	0.00648936	0.023	0.023	0	1	2.96336e-09	FALSE	0.461803	TRUE	no	no	TRUE	0
uc001mwf.2	chr11:35453378..35551848,-	BRCA_ctrl	BRCA_cancer	PAMR1	26.2599	2.13708	-3.6373	3.52896e-294	9.94664	0.535784	-4.21249	2.06854e-55	0.375	0.172	-0.203	7.69964e-09	7.69964e-09	TRUE	1	TRUE	yes	yes	TRUE	0
uc001mwg.2	chr11:35453378..35551848,-	BRCA_ctrl	BRCA_cancer	PAMR1	26.2599	2.13708	-3.6373	3.52896e-294	14.3731	1.25917	-3.51192	1.6574e-179	0.556	0.592	0.037	1	7.69964e-09	TRUE	1	TRUE	yes	yes	TRUE	0
uc010rew.1	chr11:35453378..35551848,-	BRCA_ctrl	BRCA_cancer	PAMR1	26.2599	2.13708	-3.6373	3.52896e-294	1.90642	0.338917	-2.48969	3.1358e-40	0.068	0.231	0.163	0.000309679	7.69964e-09	FALSE	1	TRUE	yes	yes	TRUE	1
uc001lpd.2	chr11:405716..417397,-	BRCA_ctrl	BRCA_cancer	SIGIRR	11.4266	25.6266	1.13212	8.29391e-31	6.09872	3.81959	-0.675015	2.85173e-10	0.591	0.212	-0.379	6.66906e-13	6.66906e-13	FALSE	0.999997	TRUE	no	yes	FALSE	0
uc001lpe.1	chr11:405716..417397,-	BRCA_ctrl	BRCA_cancer	SIGIRR	11.4266	25.6266	1.13212	8.29391e-31	2.68412	14.4029	2.42305	4.44932e-22	0.198	0.508	0.31	3.97091e-11	6.66906e-13	FALSE	0.999997	TRUE	no	yes	FALSE	0
uc001lpf.2	chr11:405716..417397,-	BRCA_ctrl	BRCA_cancer	SIGIRR	11.4266	25.6266	1.13212	8.29391e-31	1.85286	5.9068	1.6717	3.54429e-15	0.14	0.22	0.08	1	6.66906e-13	FALSE	0.999997	TRUE	no	yes	FALSE	0
uc001lzf.1	chr11:4619902..4629437,-	BRCA_ctrl	BRCA_cancer	TRIM68	6.24154	3.46716	-0.874236	5.20538e-25	3.89887	1.69698	-1.19971	8.90403e-07	0.61	0.399	-0.211	2.56534e-05	2.56534e-05	FALSE	0.999996	TRUE	no	yes	NA	0
uc010qyj.1	chr11:4619902..4629437,-	BRCA_ctrl	BRCA_cancer	TRIM68	6.24154	3.46716	-0.874236	5.20538e-25	1.78965	1.27282	-0.491966	1.10672e-06	0.294	0.394	0.1	1	2.56534e-05	NA	0.0233955	FALSE	NA	NA	NA	0
uc001nek.2	chr11:47269851..47290400,+	BRCA_ctrl	BRCA_cancer	NR1H3	26.6407	14.5048	-0.893245	6.27568e-40	3.32501	3.74696	0.172097	0.226202	0.148	0.281	0.133	2.41377e-10	2.41377e-10	FALSE	0.999993	TRUE	no	yes	TRUE	0
uc001nel.2	chr11:47269851..47290400,+	BRCA_ctrl	BRCA_cancer	NR1H3	26.6407	14.5048	-0.893245	6.27568e-40	2.49047	1.27107	-0.96951	3.28685e-42	0.098	0.092	-0.006	1	2.41377e-10	FALSE	0.999999	TRUE	no	yes	TRUE	1
uc001nem.2	chr11:47269851..47290400,+	BRCA_ctrl	BRCA_cancer	NR1H3	26.6407	14.5048	-0.893245	6.27568e-40	1.17024	0.575865	-1.02144	4.1493e-23	0.045	0.04	-0.005	1	2.41377e-10	FALSE	0.999998	TRUE	no	yes	TRUE	1
uc001nep.2	chr11:47269851..47290400,+	BRCA_ctrl	BRCA_cancer	NR1H3	26.6407	14.5048	-0.893245	6.27568e-40	4.56576	2.27132	-1.00725	1.17293e-24	0.172	0.153	-0.019	1	2.41377e-10	FALSE	0.999755	TRUE	no	yes	TRUE	0
uc009ylm.2	chr11:47269851..47290400,+	BRCA_ctrl	BRCA_cancer	NR1H3	26.6407	14.5048	-0.893245	6.27568e-40	14.9669	6.49648	-1.20377	4.07613e-34	0.533	0.423	-0.11	2.31261e-06	2.41377e-10	FALSE	0.999998	TRUE	no	yes	TRUE	0
uc001nkh.2	chr11:57174429..57195053,-	BRCA_ctrl	BRCA_cancer	SLC43A3	32.837	25.0043	-0.395768	0.000259825	25.3098	15.195	-0.736059	0.00393266	0.761	0.545	-0.216	2.39604e-05	2.39604e-05	FALSE	0.999999	TRUE	no	yes	FALSE	0
uc001nki.2	chr11:57174429..57195053,-	BRCA_ctrl	BRCA_cancer	SLC43A3	32.837	25.0043	-0.395768	0.000259825	4.30137	6.63244	0.624632	0.290403	0.141	0.351	0.209	7.08874e-05	2.39604e-05	FALSE	0.999999	TRUE	no	yes	FALSE	0
uc009yme.2	chr11:57174429..57195053,-	BRCA_ctrl	BRCA_cancer	SLC43A3	32.837	25.0043	-0.395768	0.000259825	0.831965	1.48803	0.838209	0.0372219	0.024	0.045	0.021	1	2.39604e-05	FALSE	0.999999	TRUE	no	yes	FALSE	0
uc010rjr.1	chr11:57174429..57195053,-	BRCA_ctrl	BRCA_cancer	SLC43A3	32.837	25.0043	-0.395768	0.000259825	2.0379	1.38285	-0.559125	0.00408367	0.063	0.049	-0.014	1	2.39604e-05	FALSE	0.999999	TRUE	no	yes	FALSE	0
uc001nlh.1	chr11:57480042..57586651,+	BRCA_ctrl	BRCA_cancer	CTNND1	82.3408	75.2792	-0.141125	0.0510182	1.49272	0.819453	-0.8647	2.50383e-11	0.018	0.01	-0.008	1	6.16513e-13	FALSE	1	TRUE	no	yes	NA	0
uc001nln.3	chr11:57480042..57586651,+	BRCA_ctrl	BRCA_cancer	CTNND1	82.3408	75.2792	-0.141125	0.0510182	3.73812	2.21364	-0.755793	4.56484e-08	0.045	0.029	-0.016	1	6.16513e-13	FALSE	1	TRUE	no	yes	NA	0
uc001nlo.3	chr11:57480042..57586651,+	BRCA_ctrl	BRCA_cancer	CTNND1	82.3408	75.2792	-0.141125	0.0510182	5.36593	15.7449	1.55289	8.21939e-09	0.06	0.187	0.127	6.16513e-13	6.16513e-13	FALSE	1	TRUE	no	yes	NA	0
uc001nls.3	chr11:57480042..57586651,+	BRCA_ctrl	BRCA_cancer	CTNND1	82.3408	75.2792	-0.141125	0.0510182	1.01273	0.967298	-0.0662368	0.812943	0.012	0.013	0.001	1	6.16513e-13	FALSE	1	TRUE	no	yes	NA	0
uc001nlt.3	chr11:57480042..57586651,+	BRCA_ctrl	BRCA_cancer	CTNND1	82.3408	75.2792	-0.141125	0.0510182	19.1294	11.8588	-0.689814	0.00174675	0.221	0.158	-0.063	1	6.16513e-13	FALSE	1	TRUE	no	yes	NA	0
uc001nlu.3	chr11:57480042..57586651,+	BRCA_ctrl	BRCA_cancer	CTNND1	82.3408	75.2792	-0.141125	0.0510182	8.03477	5.80074	-0.469987	0.00215337	0.091	0.072	-0.019	1	6.16513e-13	FALSE	1	TRUE	no	yes	NA	0
uc001nlv.3	chr11:57480042..57586651,+	BRCA_ctrl	BRCA_cancer	CTNND1	82.3408	75.2792	-0.141125	0.0510182	1.61478	1.62983	0.0133535	1	0.018	0.02	0.002	1	6.16513e-13	FALSE	1	TRUE	no	yes	NA	0
uc001nlw.3	chr11:57480042..57586651,+	BRCA_ctrl	BRCA_cancer	CTNND1	82.3408	75.2792	-0.141125	0.0510182	5.18648	5.17684	-0.00269069	1	0.06	0.067	0.006	1	6.16513e-13	FALSE	1	TRUE	no	yes	NA	0
uc001nly.3	chr11:57480042..57586651,+	BRCA_ctrl	BRCA_cancer	CTNND1	82.3408	75.2792	-0.141125	0.0510182	0.434487	7.77532	4.15961	8.99408e-35	0.006	0.112	0.106	1	6.16513e-13	FALSE	1	TRUE	no	yes	NA	0
uc001nma.3	chr11:57480042..57586651,+	BRCA_ctrl	BRCA_cancer	CTNND1	82.3408	75.2792	-0.141125	0.0510182	0.517549	1.06355	1.03818	6.22629e-07	0.007	0.015	0.009	1	6.16513e-13	FALSE	1	TRUE	no	yes	NA	0
uc001nmb.3	chr11:57480042..57586651,+	BRCA_ctrl	BRCA_cancer	CTNND1	82.3408	75.2792	-0.141125	0.0510182	23.2122	16.8598	-0.461297	0.0142523	0.297	0.242	-0.055	1	6.16513e-13	FALSE	1	TRUE	no	yes	NA	0
uc001nmh.3	chr11:57480042..57586651,+	BRCA_ctrl	BRCA_cancer	CTNND1	82.3408	75.2792	-0.141125	0.0510182	10.0127	3.65223	-1.45486	8.84639e-23	0.134	0.051	-0.082	1	6.16513e-13	FALSE	1	TRUE	no	yes	NA	0
uc001nnl.2	chr11:58874658..58894886,+	BRCA_ctrl	BRCA_cancer	FAM111B	1.16448	7.62795	2.71278	7.9775e-66	0.790796	5.27639	2.73692	1.15526e-38	0.534	0.622	0.088	1	4.59394e-05	FALSE	1	TRUE	no	yes	NA	0
uc010rko.1	chr11:58874658..58894886,+	BRCA_ctrl	BRCA_cancer	FAM111B	1.16448	7.62795	2.71278	7.9775e-66	0.304513	1.45944	2.25819	2.13231e-09	0.436	0.297	-0.139	4.59394e-05	4.59394e-05	FALSE	1	TRUE	no	yes	NA	0
uc001nrf.3	chr11:61116222..61129755,-	BRCA_ctrl	BRCA_cancer	CYBASC3	22.5109	24.2648	0.0213142	0.75672	9.69665	8.69765	-0.156808	0.0236324	0.422	0.358	-0.064	1	3.00758e-12	FALSE	0.995339	TRUE	no	yes	FALSE	0
uc001nrg.2	chr11:61116222..61129755,-	BRCA_ctrl	BRCA_cancer	CYBASC3	22.5109	24.2648	0.0213142	0.75672	3.35607	0.425718	-2.9767	1.48279e-06	0.137	0.018	-0.119	1.42349e-10	3.00758e-12	FALSE	0.995201	TRUE	no	yes	FALSE	0
uc001nrh.2	chr11:61116222..61129755,-	BRCA_ctrl	BRCA_cancer	CYBASC3	22.5109	24.2648	0.0213142	0.75672	7.65544	12.8068	0.741995	4.5011e-23	0.357	0.529	0.171	3.00758e-12	3.00758e-12	FALSE	0.997168	TRUE	no	yes	FALSE	0
uc001lqf.2	chr11:612556..615999,-	BRCA_ctrl	BRCA_cancer	IRF7	5.92407	22.1288	1.91634	3.42041e-58	1.23103	1.87378	0.605464	0.0408863	0.235	0.097	-0.138	4.22652e-12	4.22652e-12	FALSE	0.997366	TRUE	no	yes	TRUE	0
uc001lqg.2	chr11:612556..615999,-	BRCA_ctrl	BRCA_cancer	IRF7	5.92407	22.1288	1.91634	3.42041e-58	1.10636	2.77416	1.32532	6.11418e-29	0.201	0.141	-0.06	1	4.22652e-12	FALSE	1	TRUE	no	yes	TRUE	1
uc001lqh.2	chr11:612556..615999,-	BRCA_ctrl	BRCA_cancer	IRF7	5.92407	22.1288	1.91634	3.42041e-58	0.795602	6.42782	3.01231	2.34232e-18	0.111	0.275	0.164	1.26681e-10	4.22652e-12	FALSE	0.999999	TRUE	no	yes	TRUE	0
uc001lqi.2	chr11:612556..615999,-	BRCA_ctrl	BRCA_cancer	IRF7	5.92407	22.1288	1.91634	3.42041e-58	0.988885	3.58899	1.85807	1.71905e-29	0.157	0.172	0.015	1	4.22652e-12	FALSE	0.999999	TRUE	no	yes	TRUE	0
uc009ycb.2	chr11:612556..615999,-	BRCA_ctrl	BRCA_cancer	IRF7	5.92407	22.1288	1.91634	3.42041e-58	0.563212	2.89469	2.35891	2.22168e-07	0.093	0.114	0.021	1	4.22652e-12	FALSE	0.999985	TRUE	no	yes	TRUE	0
uc010qwf.1	chr11:612556..615999,-	BRCA_ctrl	BRCA_cancer	IRF7	5.92407	22.1288	1.91634	3.42041e-58	0.327584	1.5752	2.26103	1.58763e-17	0.054	0.071	0.017	1	4.22652e-12	FALSE	0.999999	TRUE	no	yes	TRUE	0
uc001nuo.1	chr11:62457747..62477046,-	BRCA_ctrl	BRCA_cancer	BSCL2	42.7975	74.5201	0.736787	8.75815e-28	0.449336	1.33942	1.57012	6.72041e-40	0.01	0.019	0.009	1	7.19149e-16	FALSE	0.999961	TRUE	no	yes	TRUE	0
uc001nup.2	chr11:62457747..62477046,-	BRCA_ctrl	BRCA_cancer	BSCL2	42.7975	74.5201	0.736787	8.75815e-28	26.8234	44.8411	0.741299	3.85171e-24	0.625	0.625	0.001	1	7.19149e-16	FALSE	0.999962	TRUE	no	yes	TRUE	1
uc001nuq.1	chr11:62457747..62477046,-	BRCA_ctrl	BRCA_cancer	BSCL2	42.7975	74.5201	0.736787	8.75815e-28	3.95142	17.1319	2.11573	3.09898e-07	0.084	0.195	0.11	1.51773e-06	7.19149e-16	FALSE	0.999962	TRUE	no	yes	TRUE	0
uc001nut.3	chr11:62457747..62477046,-	BRCA_ctrl	BRCA_cancer	BSCL2	42.7975	74.5201	0.736787	8.75815e-28	4.44296	6.62644	0.576333	1.10537e-15	0.103	0.092	-0.011	1	7.19149e-16	FALSE	0.999995	TRUE	no	yes	TRUE	0
uc009yod.2	chr11:62457747..62477046,-	BRCA_ctrl	BRCA_cancer	BSCL2	42.7975	74.5201	0.736787	8.75815e-28	6.66996	2.78015	-1.26215	2.84456e-06	0.167	0.046	-0.12	7.19149e-16	7.19149e-16	FALSE	0.999995	TRUE	no	yes	TRUE	0
uc001nwy.2	chr11:63228876..63258680,-	BRCA_ctrl	BRCA_cancer	HRASLS5	19.4838	4.028	-2.27753	8.28611e-45	3.11914	0.652668	-2.25545	6.47081e-10	0.16	0.115	-0.045	1	0.0011622	FALSE	0.997789	TRUE	no	yes	TRUE	0
uc001nwz.2	chr11:63228876..63258680,-	BRCA_ctrl	BRCA_cancer	HRASLS5	19.4838	4.028	-2.27753	8.28611e-45	9.04242	1.69026	-2.41892	1.45574e-21	0.462	0.321	-0.14	0.0011622	0.0011622	FALSE	0.997814	TRUE	no	yes	TRUE	0
uc009yos.2	chr11:63228876..63258680,-	BRCA_ctrl	BRCA_cancer	HRASLS5	19.4838	4.028	-2.27753	8.28611e-45	7.22919	1.63379	-2.14515	3.74525e-34	0.372	0.506	0.134	1	0.0011622	NA	0.176865	FALSE	NA	NA	TRUE	0
uc001nxa.2	chr11:63273524..63284246,+	BRCA_ctrl	BRCA_cancer	LGALS12	36.4988	1.42567	-4.67939	2.33067e-187	25.3137	0.869576	-4.86148	6.29278e-48	0.625	0.3	-0.326	3.29408e-07	3.29408e-07	FALSE	0.999699	TRUE	no	yes	NA	0
uc001nxc.2	chr11:63273524..63284246,+	BRCA_ctrl	BRCA_cancer	LGALS12	36.4988	1.42567	-4.67939	2.33067e-187	10.6036	0.392668	-4.75072	1.44409e-37	0.298	0.145	-0.153	0.00011736	3.29408e-07	FALSE	0.999635	TRUE	no	yes	NA	0
uc001nyw.2	chr11:64002266..64006258,+	BRCA_ctrl	BRCA_cancer	VEGFB	128.401	61.3942	-1.03893	1.64293e-63	60.7863	40.5972	-0.582282	2.23444e-17	0.498	0.657	0.159	3.58169e-14	3.58169e-14	FALSE	0.989583	TRUE	yes	yes	FALSE	0
uc001nyx.2	chr11:64002266..64006258,+	BRCA_ctrl	BRCA_cancer	VEGFB	128.401	61.3942	-1.03893	1.64293e-63	67.6151	20.797	-1.70081	7.6003e-139	0.502	0.343	-0.159	3.58169e-14	3.58169e-14	FALSE	0.980089	TRUE	yes	yes	FALSE	0
uc001mdk.2	chr11:6496928..6502595,-	BRCA_ctrl	BRCA_cancer	ARFIP2	24.3379	37.3503	0.637226	1.25252e-18	13.6804	18.291	0.418987	0.00285567	0.566	0.477	-0.089	1	6.49759e-08	FALSE	0.999962	TRUE	no	yes	NA	0
uc001mdl.2	chr11:6496928..6502595,-	BRCA_ctrl	BRCA_cancer	ARFIP2	24.3379	37.3503	0.637226	1.25252e-18	7.45116	15.395	1.0467	2.52984e-22	0.299	0.418	0.119	6.49759e-08	6.49759e-08	FALSE	0.999962	TRUE	no	yes	NA	0
uc009yfe.1	chr11:6496928..6502595,-	BRCA_ctrl	BRCA_cancer	ARFIP2	24.3379	37.3503	0.637226	1.25252e-18	1.6403	1.75458	0.0961372	0.423423	0.07	0.05	-0.02	1	6.49759e-08	FALSE	0.674904	TRUE	no	no	NA	1
uc010ral.1	chr11:6496928..6502595,-	BRCA_ctrl	BRCA_cancer	ARFIP2	24.3379	37.3503	0.637226	1.25252e-18	1.24181	1.36868	0.140229	0.673334	0.052	0.04	-0.012	1	6.49759e-08	FALSE	0.999863	TRUE	no	yes	NA	0
uc001ohb.2	chr11:66024765..66035332,+	BRCA_ctrl	BRCA_cancer	KLC2	6.63211	13.5189	1.01923	1.47092e-41	1.03496	1.77686	0.779391	0.00214024	0.15	0.13	-0.02	1	0.00224581	FALSE	1	TRUE	no	yes	FALSE	0
uc001ohc.2	chr11:66024765..66035332,+	BRCA_ctrl	BRCA_cancer	KLC2	6.63211	13.5189	1.01923	1.47092e-41	1.26825	5.50433	2.11699	4.76012e-11	0.161	0.361	0.201	0.00224581	0.00224581	FALSE	1	TRUE	no	yes	FALSE	0
uc001ohd.2	chr11:66024765..66035332,+	BRCA_ctrl	BRCA_cancer	KLC2	6.63211	13.5189	1.01923	1.47092e-41	0.727319	1.56337	1.10315	0.00120362	0.137	0.127	-0.01	1	0.00224581	FALSE	1	TRUE	no	yes	FALSE	0
uc010row.1	chr11:66024765..66035332,+	BRCA_ctrl	BRCA_cancer	KLC2	6.63211	13.5189	1.01923	1.47092e-41	2.97769	3.86411	0.375926	0.0186158	0.455	0.319	-0.136	1	0.00224581	FALSE	1	TRUE	no	yes	FALSE	0
uc001oif.1	chr11:66247880..66277130,+	BRCA_ctrl	BRCA_cancer	DPP3	9.77461	28.2635	1.45336	1.00544e-76	4.52756	13.9077	1.6189	6.07483e-12	0.468	0.498	0.03	1	0.0177245	FALSE	1	TRUE	no	yes	NA	1
uc001oig.1	chr11:66247880..66277130,+	BRCA_ctrl	BRCA_cancer	DPP3	9.77461	28.2635	1.45336	1.00544e-76	4.74063	10.2781	1.11633	0.00102724	0.482	0.368	-0.113	0.0177245	0.0177245	FALSE	1	TRUE	no	yes	NA	1
uc001oih.1	chr11:66247880..66277130,+	BRCA_ctrl	BRCA_cancer	DPP3	9.77461	28.2635	1.45336	1.00544e-76	0.469681	3.41283	2.85266	1.52978e-27	0.047	0.113	0.066	1	0.0177245	FALSE	0.98623	TRUE	no	no	NA	0
uc001oim.1	chr11:66288108..66313671,-	BRCA_ctrl	BRCA_cancer	ZDHHC24	6.37897	12.784	0.947082	6.69948e-29	1.42488	1.41932	-0.00540899	0.993184	0.244	0.126	-0.118	2.54402e-14	2.54402e-14	NA	0.993492	TRUE	NA	NA	TRUE	0
uc001oin.1	chr11:66288108..66313671,-	BRCA_ctrl	BRCA_cancer	ZDHHC24	6.37897	12.784	0.947082	6.69948e-29	4.8321	11.1798	1.21015	1.24453e-36	0.735	0.857	0.122	1.08339e-13	2.54402e-14	FALSE	0.999456	TRUE	no	yes	TRUE	0
uc001orf.1	chr11:71709958..71716760,+	BRCA_ctrl	BRCA_cancer	IL18BP	7.3356	8.5878	0.141342	0.145359	3.80043	3.06672	-0.309331	0.0200366	0.506	0.378	-0.127	2.18242e-05	1.53981e-09	FALSE	0.962597	TRUE	yes	no	FALSE	0
uc001orh.1	chr11:71709958..71716760,+	BRCA_ctrl	BRCA_cancer	IL18BP	7.3356	8.5878	0.141342	0.145359	1.48609	1.36947	-0.118579	0.110383	0.234	0.216	-0.018	1	1.53981e-09	FALSE	0.949007	TRUE	yes	no	FALSE	2
uc001ori.2	chr11:71709958..71716760,+	BRCA_ctrl	BRCA_cancer	IL18BP	7.3356	8.5878	0.141342	0.145359	1.02248	3.44301	1.74964	6.80871e-11	0.127	0.319	0.192	1.53981e-09	1.53981e-09	FALSE	0.962733	TRUE	yes	no	FALSE	0
uc001ose.3	chr11:71927819..71932993,+	BRCA_ctrl	BRCA_cancer	FOLR2	35.9968	8.78376	-2.03802	5.12872e-73	33.0486	6.14055	-2.42779	2.75272e-14	0.772	0.432	-0.34	3.70217e-07	3.70217e-07	FALSE	0.99416	TRUE	yes	yes	FALSE	0
uc009ytd.2	chr11:71927819..71932993,+	BRCA_ctrl	BRCA_cancer	FOLR2	35.9968	8.78376	-2.03802	5.12872e-73	1.63082	1.23471	-0.401039	0.338336	0.094	0.248	0.154	6.60628e-05	3.70217e-07	FALSE	0.995652	TRUE	yes	yes	FALSE	0
uc001osn.2	chr11:72287186..72385494,-	BRCA_ctrl	BRCA_cancer	PDE2A	19.7331	2.09277	-3.26509	2.46034e-301	7.89099	0.997269	-2.98362	1.03964257465902e-311	0.41	0.569	0.159	7.04837e-07	1.95756e-12	FALSE	1	TRUE	yes	yes	TRUE	0
uc001oso.2	chr11:72287186..72385494,-	BRCA_ctrl	BRCA_cancer	PDE2A	19.7331	2.09277	-3.26509	2.46034e-301	9.25758	0.59981	-3.94689	1.87975e-39	0.435	0.18	-0.255	1.95756e-12	1.95756e-12	FALSE	1	TRUE	no	yes	TRUE	0
uc010rra.1	chr11:72287186..72385494,-	BRCA_ctrl	BRCA_cancer	PDE2A	19.7331	2.09277	-3.26509	2.46034e-301	2.3399	0.389604	-2.58454	7.9797e-26	0.142	0.177	0.035	1	1.95756e-12	FALSE	1	TRUE	yes	yes	TRUE	0
uc001oss.2	chr11:72396115..72504750,-	BRCA_ctrl	BRCA_cancer	ARAP1	23.0162	21.5322	-0.0919799	0.163361	1.25205	2.08141	0.733072	0.0474785	0.053	0.096	0.043	1	1.21193e-13	FALSE	1	TRUE	no	yes	NA	0
uc001osu.2	chr11:72396115..72504750,-	BRCA_ctrl	BRCA_cancer	ARAP1	23.0162	21.5322	-0.0919799	0.163361	1.48496	3.23137	1.12159	4.96037e-20	0.064	0.145	0.081	1	1.21193e-13	FALSE	1	TRUE	no	yes	NA	0
uc009yth.2	chr11:72396115..72504750,-	BRCA_ctrl	BRCA_cancer	ARAP1	23.0162	21.5322	-0.0919799	0.163361	6.2241	6.93604	0.15614	0.0881146	0.279	0.335	0.056	1	1.21193e-13	FALSE	1	TRUE	no	yes	NA	0
uc010rre.1	chr11:72396115..72504750,-	BRCA_ctrl	BRCA_cancer	ARAP1	23.0162	21.5322	-0.0919799	0.163361	13.3385	7.79641	-0.774675	2.64599e-08	0.576	0.36	-0.215	1.21193e-13	1.21193e-13	FALSE	1	TRUE	no	yes	NA	0
uc001ouk.1	chr11:73588033..73638779,+	BRCA_ctrl	BRCA_cancer	PAAF1	14.9639	17.8584	0.23853	0.00100876	7.70326	11.6981	0.602572	1.29938e-09	0.531	0.66	0.128	3.41447e-07	3.41447e-07	FALSE	0.999435	TRUE	no	yes	NA	0
uc001oum.1	chr11:73588033..73638779,+	BRCA_ctrl	BRCA_cancer	PAAF1	14.9639	17.8584	0.23853	0.00100876	1.65732	0.315049	-2.39053	2.63747e-05	0.106	0.021	-0.085	1	3.41447e-07	FALSE	0.999065	TRUE	no	yes	NA	0
uc001oun.1	chr11:73588033..73638779,+	BRCA_ctrl	BRCA_cancer	PAAF1	14.9639	17.8584	0.23853	0.00100876	4.46347	5.56142	0.316302	0.00334429	0.289	0.301	0.012	1	3.41447e-07	NA	0.00793562	FALSE	NA	NA	NA	0
uc001owb.2	chr11:74811540..74917444,+	BRCA_ctrl	BRCA_cancer	SLCO2B1	14.5138	11.2758	-0.378293	9.74715e-05	11.1448	7.43806	-0.583313	0.000142049	0.747	0.575	-0.172	6.36362e-05	6.36362e-05	FALSE	1	TRUE	no	yes	TRUE	0
uc001owc.2	chr11:74811540..74917444,+	BRCA_ctrl	BRCA_cancer	SLCO2B1	14.5138	11.2758	-0.378293	9.74715e-05	1.96586	2.31608	0.236431	0.158472	0.144	0.266	0.121	1	6.36362e-05	FALSE	0.999999	TRUE	no	yes	TRUE	0
uc001oxq.3	chr11:76368569..76381791,-	BRCA_ctrl	BRCA_cancer	LRRC32	19.1533	11.7374	-0.699769	4.24881e-15	1.7861	3.27857	0.876167	1.55341e-08	0.085	0.283	0.198	4.34457e-17	4.34457e-17	FALSE	1	TRUE	yes	yes	FALSE	1
uc001oxr.3	chr11:76368569..76381791,-	BRCA_ctrl	BRCA_cancer	LRRC32	19.1533	11.7374	-0.699769	4.24881e-15	17.3672	8.45873	-1.0378	3.54874e-30	0.915	0.717	-0.198	4.34457e-17	4.34457e-17	FALSE	1	TRUE	yes	yes	FALSE	1
uc001mfm.2	chr11:7686327..7694994,-	BRCA_ctrl	BRCA_cancer	CYB5R2	8.65312	11.0056	0.365622	0.00720519	3.08782	5.24919	0.765055	2.78784e-06	0.383	0.542	0.158	8.88315e-08	8.88315e-08	FALSE	0.998444	TRUE	no	yes	FALSE	0
uc009yfk.2	chr11:7686327..7694994,-	BRCA_ctrl	BRCA_cancer	CYB5R2	8.65312	11.0056	0.365622	0.00720519	4.97263	5.11897	0.0417234	0.927398	0.55	0.403	-0.148	4.19334e-07	8.88315e-08	FALSE	0.998456	TRUE	no	yes	FALSE	0
uc009yve.2	chr11:82692479..82782884,-	BRCA_ctrl	BRCA_cancer	RAB30	8.6302	10.5353	0.22387	0.149157	2.63393	0.376296	-2.80333	6.23384e-58	0.309	0.043	-0.266	4.34457e-17	4.34457e-17	FALSE	0.935997	TRUE	no	yes	FALSE	0
uc010rst.1	chr11:82692479..82782884,-	BRCA_ctrl	BRCA_cancer	RAB30	8.6302	10.5353	0.22387	0.149157	4.87086	8.94959	0.877483	1.43265e-07	0.565	0.837	0.272	4.34457e-17	4.34457e-17	FALSE	0.936869	TRUE	no	yes	FALSE	0
uc001pao.2	chr11:85339662..85347576,+	BRCA_ctrl	BRCA_cancer	TMEM126B	24.1017	22.6679	-0.148001	0.00610541	15.4162	8.57904	-0.845075	5.72718e-48	0.629	0.389	-0.24	8.66148e-17	6.66373e-17	FALSE	0.580106	TRUE	no	yes	FALSE	0
uc001pap.2	chr11:85339662..85347576,+	BRCA_ctrl	BRCA_cancer	TMEM126B	24.1017	22.6679	-0.148001	0.00610541	6.74966	12.2133	0.85514	2.41639e-28	0.287	0.527	0.24	6.66373e-17	6.66373e-17	FALSE	0.582648	TRUE	no	yes	FALSE	0
uc001paq.1	chr11:85339662..85347576,+	BRCA_ctrl	BRCA_cancer	TMEM126B	24.1017	22.6679	-0.148001	0.00610541	1.60254	1.48149	-0.114726	0.216303	0.07	0.066	-0.003	1	6.66373e-17	FALSE	0.144818	FALSE	no	yes	FALSE	1
uc001pfm.2	chr11:95502106..95522954,-	BRCA_ctrl	BRCA_cancer	FAM76B	4.55737	3.61123	-0.337944	5.65478e-08	1.41758	0.742979	-0.931415	6.72093e-11	0.303	0.202	-0.101	1.51051e-10	1.51051e-10	NA	0.9045	TRUE	NA	NA	TRUE	0
uc001pfn.2	chr11:95502106..95522954,-	BRCA_ctrl	BRCA_cancer	FAM76B	4.55737	3.61123	-0.337944	5.65478e-08	3.13979	2.86825	-0.130666	0.0861238	0.697	0.798	0.101	1.51051e-10	1.51051e-10	FALSE	0.994419	TRUE	no	no	TRUE	0
uc001pfx.3	chr11:96085930..96123083,-	BRCA_ctrl	BRCA_cancer	CCDC82	11.42	4.33282	-1.40676	3.64487e-65	4.567	0.946239	-2.26988	8.09927e-12	0.358	0.166	-0.191	0.000573807	0.000573807	FALSE	0.999999	TRUE	no	yes	FALSE	0
uc009ywp.2	chr11:96085930..96123083,-	BRCA_ctrl	BRCA_cancer	CCDC82	11.42	4.33282	-1.40676	3.64487e-65	1.39581	0.523034	-1.41495	1.24496e-16	0.126	0.122	-0.004	1	0.000573807	FALSE	0.999999	TRUE	no	yes	FALSE	0
uc009ywq.2	chr11:96085930..96123083,-	BRCA_ctrl	BRCA_cancer	CCDC82	11.42	4.33282	-1.40676	3.64487e-65	4.2515	2.28361	-0.896424	3.7773e-08	0.411	0.587	0.176	0.000778648	0.000573807	FALSE	0.999999	TRUE	no	yes	FALSE	0
uc001tib.2	chr12:101786923..101801572,-	BRCA_ctrl	BRCA_cancer	ARL1	36.8302	46.4027	0.240487	1.37585e-05	33.2865	36.4374	0.130494	0.042171	0.907	0.783	-0.124	6.10929e-15	7.19149e-16	FALSE	0.590833	TRUE	no	yes	FALSE	0
uc001tic.2	chr12:101786923..101801572,-	BRCA_ctrl	BRCA_cancer	ARL1	36.8302	46.4027	0.240487	1.37585e-05	2.88118	9.41086	1.70726	3.92777e-47	0.075	0.204	0.129	7.19149e-16	7.19149e-16	FALSE	0.610071	TRUE	no	yes	FALSE	0
uc001tig.2	chr12:101988747..102079657,+	BRCA_ctrl	BRCA_cancer	MYBPC1	134.133	13.4537	-3.48765	7.51024e-42	32.7127	0.924313	-5.14445	1.64951e-14	0.057	0.012	-0.045	1	0.0091301	FALSE	1	TRUE	no	yes	NA	1
uc001tih.2	chr12:101988747..102079657,+	BRCA_ctrl	BRCA_cancer	MYBPC1	134.133	13.4537	-3.48765	7.51024e-42	23.4686	0.098372	-7.89011	2.17033e-17	0.002	0.001	-0.001	1	0.0091301	FALSE	1	TRUE	no	yes	NA	1
uc001tii.2	chr12:101988747..102079657,+	BRCA_ctrl	BRCA_cancer	MYBPC1	134.133	13.4537	-3.48765	7.51024e-42	2.78627	0.111484	-4.63634	6.6083e-05	0	0.003	0.002	1	0.0091301	FALSE	1	TRUE	no	yes	NA	1
uc001tij.2	chr12:101988747..102079657,+	BRCA_ctrl	BRCA_cancer	MYBPC1	134.133	13.4537	-3.48765	7.51024e-42	29.1912	0.817079	-5.15791	3.88073e-23	0.061	0.03	-0.031	1	0.0091301	FALSE	1	TRUE	no	yes	NA	1
uc001tik.2	chr12:101988747..102079657,+	BRCA_ctrl	BRCA_cancer	MYBPC1	134.133	13.4537	-3.48765	7.51024e-42	4.87934	0.164075	-4.88923	8.98234e-13	0.01	0.012	0.001	1	0.0091301	FALSE	1	TRUE	no	yes	NA	1
uc001tim.2	chr12:101988747..102079657,+	BRCA_ctrl	BRCA_cancer	MYBPC1	134.133	13.4537	-3.48765	7.51024e-42	1.952	2.02933	0.0559359	0.963767	0.085	0.146	0.062	1	0.0091301	FALSE	0.90676	TRUE	no	yes	NA	1
uc010svq.1	chr12:101988747..102079657,+	BRCA_ctrl	BRCA_cancer	MYBPC1	134.133	13.4537	-3.48765	7.51024e-42	19.983	8.16553	-1.29108	0.000387525	0.7	0.508	-0.191	0.0091301	0.0091301	FALSE	1	TRUE	no	yes	NA	1
uc010svr.1	chr12:101988747..102079657,+	BRCA_ctrl	BRCA_cancer	MYBPC1	134.133	13.4537	-3.48765	7.51024e-42	16.1541	0.00942048	-10.6591	3.2733e-23	0.001	0	-0.001	1	0.0091301	FALSE	1	TRUE	no	yes	NA	1
uc010svt.1	chr12:101988747..102079657,+	BRCA_ctrl	BRCA_cancer	MYBPC1	134.133	13.4537	-3.48765	7.51024e-42	1.22342	0.0237422	-5.65307	2.68129e-09	0.001	0	-0.001	1	0.0091301	FALSE	1	TRUE	no	yes	NA	1
uc001tkd.3	chr12:104343981..104359473,-	BRCA_ctrl	BRCA_cancer	C12orf73	3.05922	4.27478	0.466044	1.97198e-12	1.65723	1.57536	-0.0734698	0.357143	0.576	0.383	-0.192	5.73984e-15	5.73984e-15	NA	0.143501	FALSE	NA	NA	TRUE	0
uc009zuj.2	chr12:104343981..104359473,-	BRCA_ctrl	BRCA_cancer	C12orf73	3.05922	4.27478	0.466044	1.97198e-12	1.37746	2.66493	0.954669	3.14112e-28	0.416	0.608	0.192	6.01026e-15	5.73984e-15	FALSE	0.283737	FALSE	yes	yes	TRUE	0
uc001tlp.2	chr12:106751436..106903974,+	BRCA_ctrl	BRCA_cancer	POLR3B	3.82981	3.60231	-0.095711	0.112322	2.74501	2.05916	-0.41447	0.000563654	0.703	0.552	-0.151	0.000965704	0.000965704	FALSE	1	TRUE	no	yes	FALSE	0
uc001tlq.2	chr12:106751436..106903974,+	BRCA_ctrl	BRCA_cancer	POLR3B	3.82981	3.60231	-0.095711	0.112322	1.0848	1.54315	0.508094	0.00112496	0.297	0.448	0.151	0.000965704	0.000965704	FALSE	1	TRUE	no	yes	FALSE	0
uc001qyq.1	chr12:10756794..10766183,-	BRCA_ctrl	BRCA_cancer	MAGOHB	3.72933	6.70071	0.824363	7.2147e-31	2.83679	5.97585	1.07442	1.12206e-43	0.763	0.885	0.122	6.42057e-13	6.42057e-13	FALSE	0.723884	TRUE	no	yes	NA	NA
uc001tnz.1	chr12:109535415..109548798,+	BRCA_ctrl	BRCA_cancer	UNG	21.5755	28.505	0.39668	3.35707e-10	1.70362	9.83102	2.52778	3.89499e-38	0.078	0.307	0.23	2.74387e-13	2.74387e-13	FALSE	0.99873	TRUE	no	yes	FALSE	0
uc001toa.1	chr12:109535415..109548798,+	BRCA_ctrl	BRCA_cancer	UNG	21.5755	28.505	0.39668	3.35707e-10	19.8719	18.674	-0.089569	0.217088	0.922	0.693	-0.23	2.74387e-13	2.74387e-13	FALSE	0.998052	TRUE	no	yes	FALSE	0
uc001tob.2	chr12:109554400..109706028,+	BRCA_ctrl	BRCA_cancer	ACACB	52.1468	4.01371	-3.79617	0	1.20029	0.0359424	-5.0522	8.2016e-16	0.016	0.007	-0.01	1	1.0773e-06	FALSE	1	TRUE	yes	yes	NA	0
uc001toc.2	chr12:109554400..109706028,+	BRCA_ctrl	BRCA_cancer	ACACB	52.1468	4.01371	-3.79617	0	25.4592	1.5322	-4.05423	1.01682e-257	0.448	0.351	-0.097	1	1.0773e-06	FALSE	1	TRUE	yes	yes	NA	0
uc001tod.2	chr12:109554400..109706028,+	BRCA_ctrl	BRCA_cancer	ACACB	52.1468	4.01371	-3.79617	0	5.63606	0.325953	-4.11017	1.48937e-77	0.122	0.061	-0.062	1	1.0773e-06	NA	1	TRUE	NA	NA	NA	0
uc010sxm.1	chr12:109554400..109706028,+	BRCA_ctrl	BRCA_cancer	ACACB	52.1468	4.01371	-3.79617	0	19.8513	2.11961	-3.22714	2.45656e-270	0.413	0.581	0.168	1.0773e-06	1.0773e-06	FALSE	1	TRUE	no	yes	NA	0
uc001qyz.3	chr12:10998450..11324213,-	BRCA_ctrl	BRCA_cancer	PRR4	9.70524	21.5258	0.916806	7.88295e-05	6.74071	18.5989	1.4636	0.00340252	0.498	0.238	-0.26	3.73349e-11	3.73349e-11	FALSE	0.612953	TRUE	yes	yes	TRUE	0
uc009zhp.2	chr12:10998450..11324213,-	BRCA_ctrl	BRCA_cancer	PRR4	9.70524	21.5258	0.916806	7.88295e-05	1.12246	1.1019	-0.0234935	0.898104	0.222	0.376	0.154	3.46784e-08	3.73349e-11	FALSE	0.516377	TRUE	no	yes	TRUE	0
uc001qjb.2	chr12:1100404..1605099,+	BRCA_ctrl	BRCA_cancer	ERC1	11.0004	9.11109	-0.314292	1.65479e-06	5.04537	2.6251	-0.942505	1.19563e-09	0.436	0.256	-0.18	3.00997e-09	3.00997e-09	FALSE	1	TRUE	no	yes	TRUE	0
uc001qjc.2	chr12:1100404..1605099,+	BRCA_ctrl	BRCA_cancer	ERC1	11.0004	9.11109	-0.314292	1.65479e-06	0.66608	1.1995	0.848432	0.000342295	0.058	0.12	0.062	1	3.00997e-09	FALSE	1	TRUE	no	yes	TRUE	0
uc001qje.2	chr12:1100404..1605099,+	BRCA_ctrl	BRCA_cancer	ERC1	11.0004	9.11109	-0.314292	1.65479e-06	4.88672	4.84613	-0.011966	0.906352	0.471	0.578	0.107	1	3.00997e-09	NA	0.99922	TRUE	NA	NA	TRUE	0
uc001tpr.2	chr12:110367607..110434194,-	BRCA_ctrl	BRCA_cancer	GIT2	15.8331	12.6479	-0.396447	5.25706e-23	4.90434	4.60728	-0.0902569	0.134034	0.315	0.377	0.062	1	1.48767e-10	FALSE	0.955231	TRUE	no	yes	NA	0
uc001tps.2	chr12:110367607..110434194,-	BRCA_ctrl	BRCA_cancer	GIT2	15.8331	12.6479	-0.396447	5.25706e-23	6.01837	3.20666	-0.908085	1.60526e-23	0.377	0.245	-0.132	1.48767e-10	1.48767e-10	FALSE	1	TRUE	no	yes	NA	0
uc001tpu.2	chr12:110367607..110434194,-	BRCA_ctrl	BRCA_cancer	GIT2	15.8331	12.6479	-0.396447	5.25706e-23	1.48661	1.28649	-0.208242	0.140719	0.091	0.099	0.008	1	1.48767e-10	FALSE	1	TRUE	no	yes	NA	0
uc001tpw.2	chr12:110367607..110434194,-	BRCA_ctrl	BRCA_cancer	GIT2	15.8331	12.6479	-0.396447	5.25706e-23	2.97297	2.89532	-0.0381859	0.599004	0.189	0.23	0.04	1	1.48767e-10	FALSE	0.999989	TRUE	no	yes	NA	0
uc001tqk.3	chr12:110719032..110788895,+	BRCA_ctrl	BRCA_cancer	ATP2A2	76.7707	46.5198	-0.36104	1.35241e-08	24.272	24.9303	0.0386192	0.691729	0.52	0.535	0.015	1	6.22203e-15	FALSE	1	TRUE	no	yes	TRUE	1
uc001tql.3	chr12:110719032..110788895,+	BRCA_ctrl	BRCA_cancer	ATP2A2	76.7707	46.5198	-0.36104	1.35241e-08	34.4261	17.6773	-0.961471	9.09652e-13	0.246	0.353	0.107	8.4126e-14	6.22203e-15	FALSE	1	TRUE	no	yes	TRUE	0
uc001tqn.3	chr12:110719032..110788895,+	BRCA_ctrl	BRCA_cancer	ATP2A2	76.7707	46.5198	-0.36104	1.35241e-08	2.4592	1.36496	-0.849452	1.25958e-22	0.049	0.034	-0.015	1	6.22203e-15	FALSE	0.836796	TRUE	no	yes	TRUE	1
uc009zvn.2	chr12:110719032..110788895,+	BRCA_ctrl	BRCA_cancer	ATP2A2	76.7707	46.5198	-0.36104	1.35241e-08	15.4314	2.13488	-2.85245	1.41171e-18	0.181	0.065	-0.116	6.22203e-15	6.22203e-15	NA	0.00824846	FALSE	NA	NA	TRUE	0
uc001tqu.3	chr12:110906229..110928191,+	BRCA_ctrl	BRCA_cancer	C12orf24	2.68354	3.06342	0.215964	0.0499489	1.42772	2.18993	0.616516	0.0117931	0.503	0.633	0.13	0.00181441	0.00181441	FALSE	0.955125	TRUE	no	yes	NA	NA
uc001tqx.2	chr12:110929331..110939916,-	BRCA_ctrl	BRCA_cancer	VPS29	51.4624	49.6461	-0.0482317	0.306059	3.39545	10.532	1.63266	0.000773922	0.064	0.201	0.137	2.08327e-05	1.90908e-06	FALSE	0.857447	TRUE	no	yes	FALSE	0
uc001tqy.2	chr12:110929331..110939916,-	BRCA_ctrl	BRCA_cancer	VPS29	51.4624	49.6461	-0.0482317	0.306059	47.6929	38.1148	-0.323385	3.61847e-08	0.928	0.779	-0.149	1.90908e-06	1.90908e-06	FALSE	0.847597	TRUE	no	yes	FALSE	0
uc001uhc.2	chr12:125549925..125627872,+	BRCA_ctrl	BRCA_cancer	AACS	25.2614	18.1474	-0.525077	6.75848e-13	18.5612	10.4779	-0.824872	8.83569e-17	0.709	0.575	-0.135	1.15927e-08	1.15927e-08	FALSE	1	TRUE	no	yes	NA	0
uc001uhd.2	chr12:125549925..125627872,+	BRCA_ctrl	BRCA_cancer	AACS	25.2614	18.1474	-0.525077	6.75848e-13	1.26667	1.79334	0.501284	9.02875e-05	0.061	0.1	0.039	1	1.15927e-08	FALSE	1	TRUE	no	yes	NA	0
uc009zyh.2	chr12:125549925..125627872,+	BRCA_ctrl	BRCA_cancer	AACS	25.2614	18.1474	-0.525077	6.75848e-13	4.94491	5.48462	0.149153	0.219332	0.206	0.302	0.096	1	1.15927e-08	NA	0.998239	TRUE	NA	NA	NA	0
uc001uio.2	chr12:131274149..131323811,-	BRCA_ctrl	BRCA_cancer	STX2	5.40919	3.45915	-0.623038	3.06123e-26	0.942372	1.58127	0.74632	8.33839e-09	0.201	0.44	0.239	2.75479e-12	2.60116e-12	FALSE	0.998736	TRUE	no	yes	FALSE	0
uc001uip.2	chr12:131274149..131323811,-	BRCA_ctrl	BRCA_cancer	STX2	5.40919	3.45915	-0.623038	3.06123e-26	4.38342	1.84539	-1.24774	2.9442e-66	0.787	0.552	-0.235	2.60116e-12	2.60116e-12	FALSE	0.998617	TRUE	no	yes	FALSE	0
uc001ulh.2	chr12:133498048..133532868,-	BRCA_ctrl	BRCA_cancer	ZNF605	5.97197	5.32055	-0.0490149	0.51138	1.06825	0.602584	-0.825368	1.54176e-05	0.176	0.108	-0.068	1	1.17916e-08	FALSE	1	TRUE	no	yes	NA	0
uc001ulj.2	chr12:133498048..133532868,-	BRCA_ctrl	BRCA_cancer	ZNF605	5.97197	5.32055	-0.0490149	0.51138	2.32513	2.84376	0.290216	0.00214694	0.385	0.528	0.143	1.17916e-08	1.17916e-08	FALSE	1	TRUE	no	yes	NA	0
uc001ulk.1	chr12:133498048..133532868,-	BRCA_ctrl	BRCA_cancer	ZNF605	5.97197	5.32055	-0.0490149	0.51138	2.41448	1.74363	-0.469251	1.14716e-11	0.414	0.342	-0.071	1	1.17916e-08	NA	0.0160641	FALSE	NA	NA	NA	0
uc001qjo.2	chr12:1901124..2027870,-	BRCA_ctrl	BRCA_cancer	CACNA2D4	1.49412	1.1906	-0.50501	1.48256e-08	1.43281	0.936498	-0.61216	1.05431e-12	0.961	0.843	-0.118	1.55412e-11	1.55412e-11	FALSE	0.999646	TRUE	no	no	NA	NA
uc001rfq.2	chr12:22601526..22697452,-	BRCA_ctrl	BRCA_cancer	KIAA0528	12.3711	11.432	-0.118009	0.0689231	6.50105	8.24193	0.342265	6.40518e-05	0.522	0.711	0.189	2.13503e-16	2.13503e-16	FALSE	1	TRUE	no	yes	FALSE	0
uc010sis.1	chr12:22601526..22697452,-	BRCA_ctrl	BRCA_cancer	KIAA0528	12.3711	11.432	-0.118009	0.0689231	4.48186	2.54806	-0.814477	7.34521e-15	0.366	0.221	-0.145	1.17441e-11	2.13503e-16	FALSE	1	TRUE	no	yes	FALSE	0
uc001rgh.2	chr12:25205241..25261268,+	BRCA_ctrl	BRCA_cancer	LRMP	3.38125	1.91375	-0.832587	1.1626e-09	2.10194	0.963752	-1.12427	1.72493e-05	0.593	0.363	-0.23	3.76411e-07	3.76411e-07	FALSE	0.99999	TRUE	no	yes	NA	0
uc001rgx.2	chr12:26111969..26232824,+	BRCA_ctrl	BRCA_cancer	RASSF8	7.78173	5.1091	-0.607084	1.25211e-08	4.45603	2.14556	-1.05422	3.76809e-05	0.542	0.361	-0.181	0.0160314	0.0101949	FALSE	0.999945	TRUE	no	yes	FALSE	0
uc001rgy.2	chr12:26111969..26232824,+	BRCA_ctrl	BRCA_cancer	RASSF8	7.78173	5.1091	-0.607084	1.25211e-08	3.101	2.77739	-0.158924	0.394349	0.434	0.618	0.184	0.0101949	0.0101949	FALSE	0.999946	TRUE	no	yes	FALSE	0
uc001rhl.2	chr12:27091316..27118862,+	BRCA_ctrl	BRCA_cancer	FGFR1OP2	18.2843	13.3586	-0.512473	7.49913e-24	5.72252	4.8186	-0.247594	0.000561224	0.323	0.363	0.04	1	1.36065e-14	FALSE	0.876906	TRUE	no	yes	NA	0
uc001rhm.2	chr12:27091316..27118862,+	BRCA_ctrl	BRCA_cancer	FGFR1OP2	18.2843	13.3586	-0.512473	7.49913e-24	6.10703	2.51496	-1.27935	2.31272e-53	0.322	0.183	-0.139	1.36065e-14	1.36065e-14	FALSE	0.989735	TRUE	no	yes	NA	0
uc001rhn.2	chr12:27091316..27118862,+	BRCA_ctrl	BRCA_cancer	FGFR1OP2	18.2843	13.3586	-0.512473	7.49913e-24	6.45473	6.02505	-0.0995394	0.227297	0.355	0.454	0.098	1	1.36065e-14	FALSE	0.96425	TRUE	no	yes	NA	0
uc010ske.1	chr12:32638906..32798982,+	BRCA_ctrl	BRCA_cancer	FGD4	5.09291	1.99805	-1.35934	1.12762e-77	4.12279	1.03968	-1.98714	2.04327e-35	0.778	0.487	-0.291	5.11801e-05	5.11801e-05	FALSE	1	TRUE	no	yes	NA	0
uc001rmg.3	chr12:40618813..40763084,+	BRCA_ctrl	BRCA_cancer	LRRK2	3.01531	1.65112	-0.965015	9.65675e-15	1.67485	0.577491	-1.53558	9.35289e-21	0.491	0.305	-0.186	2.77473e-06	2.77473e-06	FALSE	1	TRUE	no	yes	NA	0
uc001rmm.1	chr12:41086358..41464094,+	BRCA_ctrl	BRCA_cancer	CNTN1	5.19495	2.05926	-1.33265	5.45468e-17	4.62087	1.39198	-1.73057	1.45617e-05	0.784	0.375	-0.409	1.73196e-06	1.73196e-06	FALSE	1	TRUE	yes	yes	NA	NA
uc001rod.2	chr12:44229962..44783540,+	BRCA_ctrl	BRCA_cancer	TMEM117	2.72698	1.79174	-0.614609	9.75738e-18	1.20318	0.532827	-1.17373	0.00128142	0.438	0.246	-0.192	0.00174968	0.00174968	FALSE	0.999983	TRUE	no	yes	TRUE	0
uc001roe.2	chr12:44229962..44783540,+	BRCA_ctrl	BRCA_cancer	TMEM117	2.72698	1.79174	-0.614609	9.75738e-18	1.31048	1.00315	-0.385327	0.0265803	0.48	0.588	0.108	1	0.00174968	FALSE	0.999528	TRUE	no	yes	TRUE	0
uc001rom.1	chr12:45566847..45609789,-	BRCA_ctrl	BRCA_cancer	PLEKHA9	3.49665	2.17691	-0.695399	4.14277e-35	2.80088	1.4902	-0.909294	2.25174e-33	0.802	0.684	-0.118	0.000330674	0.000330674	FALSE	0.999762	TRUE	no	yes	NA	NA
uc001rrc.2	chr12:48499706..48539887,+	BRCA_ctrl	BRCA_cancer	PFKM	25.2581	14.7815	-0.767304	1.54196e-22	15.3681	9.25618	-0.731331	0.00029228	0.732	0.557	-0.174	0.00130913	0.00130913	FALSE	1	TRUE	no	yes	FALSE	0
uc001rre.1	chr12:48499706..48539887,+	BRCA_ctrl	BRCA_cancer	PFKM	25.2581	14.7815	-0.767304	1.54196e-22	6.46872	1.93757	-1.73877	0.000178442	0.06	0.179	0.119	1	0.00130913	FALSE	1	TRUE	no	yes	FALSE	0
uc001rrg.1	chr12:48499706..48539887,+	BRCA_ctrl	BRCA_cancer	PFKM	25.2581	14.7815	-0.767304	1.54196e-22	2.07212	2.25426	0.121218	0.451734	0.129	0.165	0.036	1	0.00130913	FALSE	1	TRUE	no	yes	FALSE	0
uc001ryc.1	chr12:51639133..51664202,-	BRCA_ctrl	BRCA_cancer	SMAGP	9.97254	11.0556	0.178284	0.0812206	1.50948	2.27425	0.590126	1.47393e-06	0.148	0.203	0.055	1	1.61139e-08	FALSE	0.862115	TRUE	no	no	FALSE	0
uc001ryd.1	chr12:51639133..51664202,-	BRCA_ctrl	BRCA_cancer	SMAGP	9.97254	11.0556	0.178284	0.0812206	0.318867	1.95113	2.60414	1.08709e-10	0.029	0.13	0.102	1	1.61139e-08	FALSE	0.86555	TRUE	no	no	FALSE	0
uc001rye.1	chr12:51639133..51664202,-	BRCA_ctrl	BRCA_cancer	SMAGP	9.97254	11.0556	0.178284	0.0812206	8.13408	6.80794	-0.256772	0.0101343	0.823	0.665	-0.157	1.61139e-08	1.61139e-08	FALSE	0.865472	TRUE	no	no	FALSE	0
uc001sdy.2	chr12:53901640..54020199,-	BRCA_ctrl	BRCA_cancer	ATF7	22.4966	15.5597	-0.807518	6.79316e-62	6.78708	5.82647	-0.22018	0.0107093	0.331	0.402	0.071	1	2.30042e-07	FALSE	0.999996	TRUE	no	yes	TRUE	0
uc001sdz.2	chr12:53901640..54020199,-	BRCA_ctrl	BRCA_cancer	ATF7	22.4966	15.5597	-0.807518	6.79316e-62	11.5089	4.18463	-1.4595	4.52008e-05	0.472	0.24	-0.233	2.30042e-07	2.30042e-07	FALSE	0.999994	TRUE	no	yes	TRUE	0
uc001sea.3	chr12:53901640..54020199,-	BRCA_ctrl	BRCA_cancer	ATF7	22.4966	15.5597	-0.807518	6.79316e-62	2.29949	1.94113	-0.243953	0.511617	0.096	0.118	0.022	1	2.30042e-07	FALSE	0.26623	FALSE	no	no	TRUE	0
uc001seb.3	chr12:53901640..54020199,-	BRCA_ctrl	BRCA_cancer	ATF7	22.4966	15.5597	-0.807518	6.79316e-62	1.53747	3.3291	1.11348	1.08023e-06	0.082	0.221	0.139	1	2.30042e-07	FALSE	0.265128	FALSE	no	no	TRUE	0
uc001ses.2	chr12:54410642..54424606,+	BRCA_ctrl	BRCA_cancer	HOXC6	6.88288	6.56274	-0.0339488	0.776203	1.38457	2.03721	0.557106	8.06982e-05	0.2	0.306	0.105	2.15595e-11	2.15595e-11	FALSE	0.926466	TRUE	no	yes	TRUE	0
uc001sev.2	chr12:54410642..54424606,+	BRCA_ctrl	BRCA_cancer	HOXC6	6.88288	6.56274	-0.0339488	0.776203	5.49831	4.52553	-0.280771	0.00222345	0.8	0.694	-0.105	2.15595e-11	2.15595e-11	FALSE	0.994687	TRUE	no	yes	TRUE	0
uc001sge.2	chr12:54943404..54973023,+	BRCA_ctrl	BRCA_cancer	PDE1B	8.00594	2.11555	-1.93291	1.82644e-110	6.76481	1.43845	-2.23283	3.833e-39	0.777	0.593	-0.184	0.0496963	0.0496963	FALSE	1	TRUE	no	yes	NA	0
uc001shk.2	chr12:56114151..56118525,+	BRCA_ctrl	BRCA_cancer	RDH5	40.3749	1.80907	-4.47935	0	28.8153	1.46027	-4.30134	9.90204e-245	0.708	0.846	0.138	1.22551e-05	6.76955e-06	FALSE	0.99983	TRUE	yes	yes	FALSE	0
uc001shl.2	chr12:56114151..56118525,+	BRCA_ctrl	BRCA_cancer	RDH5	40.3749	1.80907	-4.47935	0	8.2886	0.216969	-5.24505	5.64979e-30	0.206	0.091	-0.115	6.76955e-06	6.76955e-06	FALSE	0.99983	TRUE	yes	yes	FALSE	0
uc010spu.1	chr12:56114151..56118525,+	BRCA_ctrl	BRCA_cancer	RDH5	40.3749	1.80907	-4.47935	0	3.26904	0.129911	-4.63646	2.0163e-102	0.086	0.059	-0.026	1	6.76955e-06	FALSE	0.765894	TRUE	no	yes	FALSE	0
uc001sij.2	chr12:56324946..56347805,+	BRCA_ctrl	BRCA_cancer	DGKA	7.9765	8.58735	0.114428	0.195726	2.39564	3.8793	0.69508	7.74642e-06	0.287	0.44	0.153	1.41641e-08	1.41641e-08	FALSE	1	TRUE	no	yes	FALSE	0
uc001sim.2	chr12:56324946..56347805,+	BRCA_ctrl	BRCA_cancer	DGKA	7.9765	8.58735	0.114428	0.195726	3.95819	3.06286	-0.369913	0.0486713	0.505	0.368	-0.137	1.15788e-05	1.41641e-08	FALSE	1	TRUE	no	yes	FALSE	0
uc001sjv.2	chr12:56552100..56555366,+	BRCA_ctrl	BRCA_cancer	MYL6	1042.1	988.003	-0.107667	0.0766487	7.09765	2.36326	-1.58606	6.33098e-06	0.009	0.003	-0.006	1	3.52579e-14	FALSE	0.988705	TRUE	no	yes	FALSE	1
uc001sjw.1	chr12:56552100..56555366,+	BRCA_ctrl	BRCA_cancer	MYL6	1042.1	988.003	-0.107667	0.0766487	731.474	485.11	-0.59249	2.89333e-12	0.688	0.487	-0.202	3.56568e-13	3.52579e-14	FALSE	0.990336	TRUE	no	yes	FALSE	0
uc001sjx.1	chr12:56552100..56555366,+	BRCA_ctrl	BRCA_cancer	MYL6	1042.1	988.003	-0.107667	0.0766487	282.646	477.721	0.757169	2.29893e-19	0.279	0.48	0.201	3.52579e-14	3.52579e-14	FALSE	0.992987	TRUE	no	yes	FALSE	0
uc010sqd.1	chr12:56552100..56555366,+	BRCA_ctrl	BRCA_cancer	MYL6	1042.1	988.003	-0.107667	0.0766487	11.2895	9.38258	-0.266842	4.89961e-05	0.011	0.01	-0.001	1	3.52579e-14	FALSE	0.996218	TRUE	no	yes	FALSE	2
uc010sqe.1	chr12:56552100..56555366,+	BRCA_ctrl	BRCA_cancer	MYL6	1042.1	988.003	-0.107667	0.0766487	9.17263	13.2531	0.530766	0.469897	0.012	0.02	0.008	1	3.52579e-14	FALSE	0.958095	TRUE	no	no	FALSE	0
uc001ska.2	chr12:56555637..56583351,-	BRCA_ctrl	BRCA_cancer	SMARCC2	30.3103	24.4303	-0.292412	4.17614e-13	14.5017	4.13726	-1.80933	2.0154e-83	0.466	0.171	-0.295	4.34457e-17	4.34457e-17	FALSE	1	TRUE	no	yes	TRUE	0
uc001skb.2	chr12:56555637..56583351,-	BRCA_ctrl	BRCA_cancer	SMARCC2	30.3103	24.4303	-0.292412	4.17614e-13	14.1635	18.1214	0.355468	1.02857e-12	0.477	0.741	0.264	4.34457e-17	4.34457e-17	FALSE	1	TRUE	no	yes	TRUE	1
uc001skd.2	chr12:56555637..56583351,-	BRCA_ctrl	BRCA_cancer	SMARCC2	30.3103	24.4303	-0.292412	4.17614e-13	0.691841	1.47834	1.09498	3.93613e-05	0.025	0.058	0.033	1	4.34457e-17	FALSE	1	TRUE	no	yes	TRUE	0
uc001skp.3	chr12:56660642..56664748,+	BRCA_ctrl	BRCA_cancer	COQ10A	7.19136	3.97764	-0.853215	1.15719e-33	4.42427	1.72292	-1.35913	4.83016e-15	0.638	0.404	-0.234	2.03907e-11	2.03907e-11	FALSE	0.98082	TRUE	no	yes	FALSE	0
uc001skq.3	chr12:56660642..56664748,+	BRCA_ctrl	BRCA_cancer	COQ10A	7.19136	3.97764	-0.853215	1.15719e-33	1.97865	1.73576	-0.187394	0.362681	0.263	0.457	0.194	2.39425e-10	2.03907e-11	FALSE	0.979355	TRUE	no	yes	FALSE	0
uc001snp.2	chr12:57637242..57644976,-	BRCA_ctrl	BRCA_cancer	STAC3	11.1073	2.25727	-2.31935	5.61689e-110	9.41488	0.895507	-3.39198	4.54252e-39	0.177	0.351	0.174	0.0013536	0.0013536	FALSE	0.999971	TRUE	no	yes	TRUE	0
uc001snq.2	chr12:57637242..57644976,-	BRCA_ctrl	BRCA_cancer	STAC3	11.1073	2.25727	-2.31935	5.61689e-110	0.903708	1.21615	0.42832	0.050605	0.765	0.584	-0.181	0.00372759	0.0013536	FALSE	0.999927	TRUE	no	yes	TRUE	0
uc001sre.2	chr12:62860597..62991362,+	BRCA_ctrl	BRCA_cancer	MON2	7.87847	5.73153	-0.489734	3.92122e-17	3.69158	1.53959	-1.26155	1.13638e-08	0.44	0.248	-0.192	0.0001762	0.0001762	FALSE	1	TRUE	no	yes	NA	0
uc010ssn.1	chr12:62860597..62991362,+	BRCA_ctrl	BRCA_cancer	MON2	7.87847	5.73153	-0.489734	3.92122e-17	2.74573	2.53018	-0.117916	0.583771	0.339	0.412	0.073	1	0.0001762	FALSE	1	TRUE	no	yes	NA	0
uc001ssm.2	chr12:65672488..65860680,+	BRCA_ctrl	BRCA_cancer	MSRB3	34.2084	9.26173	-1.89345	9.25286e-107	16.7687	2.88674	-2.53801	2.74081e-106	0.496	0.279	-0.217	3.49815e-16	3.21957e-16	FALSE	0.738146	TRUE	no	yes	TRUE	0
uc001ssn.2	chr12:65672488..65860680,+	BRCA_ctrl	BRCA_cancer	MSRB3	34.2084	9.26173	-1.89345	9.25286e-107	16.6919	6.25486	-1.41601	1.63475e-59	0.481	0.709	0.229	3.21957e-16	3.21957e-16	FALSE	0.585954	TRUE	yes	yes	TRUE	0
uc001sth.2	chr12:66582978..66648392,+	BRCA_ctrl	BRCA_cancer	IRAK3	4.43953	1.77356	-1.31481	1.90978e-25	3.13469	1.12413	-1.47921	3.79542e-10	0.637	0.478	-0.159	0.0264542	0.0182103	FALSE	0.999998	TRUE	yes	yes	TRUE	0
uc010ssy.1	chr12:66582978..66648392,+	BRCA_ctrl	BRCA_cancer	IRAK3	4.43953	1.77356	-1.31481	1.90978e-25	1.13946	0.600059	-0.924917	4.07758e-06	0.327	0.496	0.168	0.0182103	0.0182103	FALSE	0.999988	TRUE	yes	yes	TRUE	0
uc001sup.2	chr12:69244958..69357020,-	BRCA_ctrl	BRCA_cancer	CPM	20.9467	4.60539	-2.18697	3.71492e-121	16.9801	1.67813	-3.33862	5.08645e-28	0.468	0.19	-0.278	0.00465305	6.18314e-05	FALSE	0.99989	TRUE	yes	yes	FALSE	0
uc001suq.2	chr12:69244958..69357020,-	BRCA_ctrl	BRCA_cancer	CPM	20.9467	4.60539	-2.18697	3.71492e-121	2.91895	2.72997	-0.0965604	0.768734	0.44	0.752	0.312	6.18314e-05	6.18314e-05	FALSE	0.99989	TRUE	yes	yes	FALSE	0
uc001sur.2	chr12:69244958..69357020,-	BRCA_ctrl	BRCA_cancer	CPM	20.9467	4.60539	-2.18697	3.71492e-121	1.0477	0.19729	-2.40678	1.48488e-08	0.092	0.058	-0.034	1	6.18314e-05	FALSE	0.99989	TRUE	yes	yes	FALSE	0
uc001qrg.2	chr12:6953963..6960456,-	BRCA_ctrl	BRCA_cancer	CDCA3	1.02875	10.9216	3.13236	1.4093e-93	0.820407	10.4688	3.67136	7.78861e-102	0.723	0.938	0.216	6.80665e-17	6.80665e-17	FALSE	0.994316	TRUE	no	no	NA	NA
uc001qsa.1	chr12:7055740..7070479,+	BRCA_ctrl	BRCA_cancer	PTPN6	12.8307	23.4001	0.856128	1.67294e-38	6.16731	12.5204	1.02122	6.41702e-28	0.474	0.568	0.094	1	0.00164788	FALSE	1	TRUE	no	yes	NA	0
uc001qsb.2	chr12:7055740..7070479,+	BRCA_ctrl	BRCA_cancer	PTPN6	12.8307	23.4001	0.856128	1.67294e-38	4.52656	6.03017	0.413718	0.010828	0.345	0.236	-0.109	0.00164788	0.00164788	FALSE	1	TRUE	no	yes	NA	0
uc010sfr.1	chr12:7055740..7070479,+	BRCA_ctrl	BRCA_cancer	PTPN6	12.8307	23.4001	0.856128	1.67294e-38	1.38349	3.6253	1.38877	7.19607e-11	0.119	0.144	0.025	1	0.00164788	FALSE	1	TRUE	no	yes	NA	0
uc001swb.3	chr12:70910634..71031219,-	BRCA_ctrl	BRCA_cancer	PTPRB	11.2808	2.81105	-1.99461	3.63277e-121	7.51042	1.4107	-2.41228	3.61034e-56	0.651	0.448	-0.203	6.03327e-10	6.03327e-10	FALSE	1	TRUE	yes	yes	NA	0
uc001swc.3	chr12:70910634..71031219,-	BRCA_ctrl	BRCA_cancer	PTPRB	11.2808	2.81105	-1.99461	3.63277e-121	1.95904	0.829996	-1.23875	1.64069e-07	0.166	0.254	0.088	1	6.03327e-10	FALSE	1	TRUE	no	yes	NA	0
uc001swj.1	chr12:71518877..71835678,-	BRCA_ctrl	BRCA_cancer	TSPAN8	4.37978	6.95863	0.666561	0.075226	3.33331	4.77531	0.518368	0.485511	0.665	0.325	-0.339	2.50441e-06	2.50441e-06	FALSE	0.879369	TRUE	no	yes	FALSE	0
uc009zrt.1	chr12:71518877..71835678,-	BRCA_ctrl	BRCA_cancer	TSPAN8	4.37978	6.95863	0.666561	0.075226	1.04647	2.17615	1.05458	0.014502	0.335	0.668	0.333	2.62557e-06	2.50441e-06	FALSE	0.879478	TRUE	no	yes	FALSE	0
uc001sws.2	chr12:72079878..72097837,+	BRCA_ctrl	BRCA_cancer	TMEM19	8.69282	8.48368	-0.087848	0.18318	7.5287	6.36261	-0.242714	7.27326e-05	0.883	0.769	-0.114	1.56028e-13	1.56028e-13	FALSE	0.994799	TRUE	no	yes	TRUE	1
uc009zru.1	chr12:72079878..72097837,+	BRCA_ctrl	BRCA_cancer	TMEM19	8.69282	8.48368	-0.087848	0.18318	0.929513	1.86848	1.00696	9.79972e-07	0.089	0.202	0.112	1.93304e-13	1.56028e-13	NA	0.995205	TRUE	NA	NA	TRUE	0
uc001tdi.2	chr12:94960900..95044324,-	BRCA_ctrl	BRCA_cancer	TMCC3	4.96672	2.23046	-1.15728	4.25656e-36	2.41724	1.48792	-0.69998	4.7138e-05	0.524	0.738	0.214	0.000384269	0.000384269	FALSE	0.999997	TRUE	no	yes	FALSE	0
uc001tdj.2	chr12:94960900..95044324,-	BRCA_ctrl	BRCA_cancer	TMCC3	4.96672	2.23046	-1.15728	4.25656e-36	2.54948	0.742543	-1.77912	5.99668e-05	0.476	0.262	-0.214	0.000384269	0.000384269	FALSE	0.999999	TRUE	no	yes	FALSE	0
uc001voo.2	chr13:100741337..101182686,+	BRCA_ctrl	BRCA_cancer	PCCA	16.1635	7.11109	-1.21662	8.73831e-73	12.9879	4.71838	-1.46053	5.98278e-28	0.788	0.624	-0.164	0.000421959	0.000421959	FALSE	1	TRUE	no	yes	FALSE	0
uc001vop.2	chr13:100741337..101182686,+	BRCA_ctrl	BRCA_cancer	PCCA	16.1635	7.11109	-1.21662	8.73831e-73	1.27599	0.799447	-0.674533	4.68764e-06	0.078	0.118	0.039	1	0.000421959	NA	0.655062	TRUE	NA	NA	FALSE	0
uc010aga.2	chr13:100741337..101182686,+	BRCA_ctrl	BRCA_cancer	PCCA	16.1635	7.11109	-1.21662	8.73831e-73	1.2508	1.40711	0.169717	0.656949	0.093	0.233	0.14	1	0.000421959	FALSE	1	TRUE	no	yes	FALSE	0
uc001vpb.2	chr13:102104966..102371131,+	BRCA_ctrl	BRCA_cancer	ITGBL1	12.652	19.2382	0.573195	9.26648e-06	8.15443	14.9027	0.869835	6.16151e-08	0.639	0.737	0.098	1	1.36888e-16	FALSE	0.999995	TRUE	yes	yes	NA	0
uc001vpc.3	chr13:102104966..102371131,+	BRCA_ctrl	BRCA_cancer	ITGBL1	12.652	19.2382	0.573195	9.26648e-06	4.17773	3.07736	-0.440968	0.00160561	0.327	0.155	-0.172	1.36888e-16	1.36888e-16	FALSE	0.999342	TRUE	no	yes	NA	0
uc001vqn.2	chr13:108859794..108870716,-	BRCA_ctrl	BRCA_cancer	LIG4	4.44329	3.34363	-0.415395	1.20259e-10	1.72118	1.50274	-0.195563	0.290756	0.375	0.411	0.036	1	1.99795e-09	FALSE	1	TRUE	no	yes	NA	0
uc001vqp.2	chr13:108859794..108870716,-	BRCA_ctrl	BRCA_cancer	LIG4	4.44329	3.34363	-0.415395	1.20259e-10	1.92903	0.681633	-1.4999	1.93965e-15	0.422	0.198	-0.224	1.99795e-09	1.99795e-09	FALSE	1	TRUE	no	yes	NA	0
uc001vsr.2	chr13:113622757..113752863,+	BRCA_ctrl	BRCA_cancer	MCF2L	9.4745	9.92491	0.0520391	0.617086	5.42735	2.07581	-1.38628	6.7269e-36	0.541	0.223	-0.318	3.35935e-12	2.5912e-15	FALSE	1	TRUE	no	yes	TRUE	0
uc010tjr.1	chr13:113622757..113752863,+	BRCA_ctrl	BRCA_cancer	MCF2L	9.4745	9.92491	0.0520391	0.617086	1.48924	1.4048	-0.0842179	0.762273	0.172	0.152	-0.02	1	2.5912e-15	FALSE	1	TRUE	no	yes	TRUE	0
uc010tjs.1	chr13:113622757..113752863,+	BRCA_ctrl	BRCA_cancer	MCF2L	9.4745	9.92491	0.0520391	0.617086	1.78248	5.64582	1.66281	3.07046e-28	0.205	0.54	0.335	2.5912e-15	2.5912e-15	FALSE	1	TRUE	yes	yes	TRUE	0
uc001vtr.1	chr13:114110134..114145023,-	BRCA_ctrl	BRCA_cancer	DCUN1D2	4.76319	5.05213	0.0841379	0.257374	2.29758	1.27981	-0.843023	2.21211e-08	0.411	0.264	-0.147	1	2.28702e-08	FALSE	0.990321	TRUE	no	yes	TRUE	0
uc001vts.1	chr13:114110134..114145023,-	BRCA_ctrl	BRCA_cancer	DCUN1D2	4.76319	5.05213	0.0841379	0.257374	1.94116	2.85582	0.5568	5.17772e-08	0.461	0.569	0.108	2.28702e-08	2.28702e-08	NA	0.944952	TRUE	NA	NA	TRUE	0
uc001vui.2	chr13:114747195..114898095,-	BRCA_ctrl	BRCA_cancer	RASA3	16.3947	7.12208	-1.21052	5.27489e-61	8.5838	3.22601	-1.41171	0.00262669	0.487	0.369	-0.118	0.00797304	0.00797304	FALSE	1	TRUE	no	yes	FALSE	0
uc010tkk.1	chr13:114747195..114898095,-	BRCA_ctrl	BRCA_cancer	RASA3	16.3947	7.12208	-1.21052	5.27489e-61	7.3815	3.66255	-1.01097	2.18169e-05	0.482	0.602	0.119	0.0169261	0.00797304	FALSE	1	TRUE	no	yes	FALSE	0
uc001uot.2	chr13:24144723..24250231,+	BRCA_ctrl	BRCA_cancer	TNFRSF19	4.98536	5.82061	0.237326	0.0860075	0.25008	1.02961	2.03887	2.71914e-08	0.044	0.163	0.119	7.89249e-12	7.89249e-12	FALSE	0.999817	TRUE	yes	no	FALSE	0
uc001uow.2	chr13:24144723..24250231,+	BRCA_ctrl	BRCA_cancer	TNFRSF19	4.98536	5.82061	0.237326	0.0860075	4.59039	4.55044	-0.0126735	0.976325	0.923	0.782	-0.141	6.89408e-11	7.89249e-12	FALSE	0.99982	TRUE	yes	no	FALSE	0
uc001uqv.2	chr13:27131840..27263080,+	BRCA_ctrl	BRCA_cancer	WASF3	10.4297	2.10853	-2.30504	1.97134e-128	2.20934	1.24865	-0.822961	0.000228494	0.279	0.442	0.163	0.000594829	0.000594829	FALSE	0.999999	TRUE	no	yes	FALSE	0
uc001uqw.2	chr13:27131840..27263080,+	BRCA_ctrl	BRCA_cancer	WASF3	10.4297	2.10853	-2.30504	1.97134e-128	8.22036	0.859878	-3.25629	1.14555e-224	0.721	0.558	-0.163	0.000594829	0.000594829	FALSE	0.999998	TRUE	no	yes	FALSE	0
uc001usb.3	chr13:28874483..29069265,-	BRCA_ctrl	BRCA_cancer	FLT1	16.8103	8.93902	-0.928965	6.76267e-35	5.29215	1.609	-1.71742	4.95987e-38	0.295	0.163	-0.133	1	4.34457e-17	FALSE	1	TRUE	yes	yes	TRUE	0
uc001usc.3	chr13:28874483..29069265,-	BRCA_ctrl	BRCA_cancer	FLT1	16.8103	8.93902	-0.928965	6.76267e-35	5.12671	4.09244	-0.324999	0.000266605	0.315	0.442	0.127	4.34457e-17	4.34457e-17	FALSE	1	TRUE	yes	yes	TRUE	0
uc010aaq.2	chr13:28874483..29069265,-	BRCA_ctrl	BRCA_cancer	FLT1	16.8103	8.93902	-0.928965	6.76267e-35	4.49675	1.7617	-1.35155	3.15708e-26	0.257	0.19	-0.067	1	4.34457e-17	FALSE	0.999993	TRUE	no	yes	TRUE	0
uc001uuv.2	chr13:33677273..34250932,-	BRCA_ctrl	BRCA_cancer	STARD13	8.53723	5.04898	-0.782881	1.7336e-22	1.25176	1.16446	-0.104285	0.712712	0.146	0.237	0.09	1	8.89037e-09	FALSE	1	TRUE	no	yes	NA	0
uc001uuw.2	chr13:33677273..34250932,-	BRCA_ctrl	BRCA_cancer	STARD13	8.53723	5.04898	-0.782881	1.7336e-22	6.44579	2.88658	-1.15885	1.99276e-21	0.743	0.55	-0.193	8.89037e-09	8.89037e-09	FALSE	1	TRUE	no	yes	NA	0
uc001vcu.2	chr13:49822103..49867619,+	BRCA_ctrl	BRCA_cancer	CDADC1	4.93183	2.91883	-0.952004	3.62529e-105	3.33688	1.56343	-1.0929	2.30843e-98	0.674	0.546	-0.128	1.96486e-09	1.96486e-09	FALSE	0.999986	TRUE	no	no	NA	0
uc001vcw.2	chr13:49882787..50018221,-	BRCA_ctrl	BRCA_cancer	CAB39L	23.7495	9.64969	-1.30997	4.10452e-59	19.6873	6.28511	-1.64716	1.1477e-46	0.816	0.578	-0.238	9.23347e-12	9.23347e-12	FALSE	0.999426	TRUE	no	yes	FALSE	0
uc001vcx.2	chr13:49882787..50018221,-	BRCA_ctrl	BRCA_cancer	CAB39L	23.7495	9.64969	-1.30997	4.10452e-59	4.03992	3.33723	-0.275696	0.00975859	0.183	0.418	0.235	1.11049e-11	9.23347e-12	FALSE	0.999431	TRUE	no	yes	FALSE	0
uc001vec.2	chr13:50656414..51102670,+	BRCA_ctrl	BRCA_cancer	DLEU1	3.03054	4.99657	0.72512	7.74978e-20	1.56676	2.07994	0.406998	2.87512e-05	0.515	0.422	-0.093	1	1.15411e-06	NA	0.0131499	FALSE	NA	NA	NA	0
uc001ved.2	chr13:50656414..51102670,+	BRCA_ctrl	BRCA_cancer	DLEU1	3.03054	4.99657	0.72512	7.74978e-20	1.4026	2.87219	1.03145	1.14669e-22	0.464	0.566	0.102	1.15411e-06	1.15411e-06	NA	0.00454802	FALSE	NA	NA	NA	0
uc001vhk.1	chr13:53602972..53626186,+	BRCA_ctrl	BRCA_cancer	OLFM4	17.7803	27.0308	0.526091	0.193671	1.25847	9.77337	2.95627	6.99943e-05	0.081	0.293	0.212	2.8272e-06	2.8272e-06	FALSE	0.766055	TRUE	yes	no	TRUE	0
uc001vhl.2	chr13:53602972..53626186,+	BRCA_ctrl	BRCA_cancer	OLFM4	17.7803	27.0308	0.526091	0.193671	16.5219	17.2575	0.0628409	0.930474	0.919	0.707	-0.212	2.8272e-06	2.8272e-06	FALSE	0.999997	TRUE	yes	yes	TRUE	0
uc010thn.1	chr13:72012098..72441330,-	BRCA_ctrl	BRCA_cancer	DACH1	3.93071	6.25102	0.654788	0.000754468	3.26987	4.66906	0.513858	0.0353267	0.822	0.629	-0.194	1.9654e-05	1.15419e-05	FALSE	1	TRUE	no	yes	TRUE	0
uc010thp.1	chr13:72012098..72441330,-	BRCA_ctrl	BRCA_cancer	DACH1	3.93071	6.25102	0.654788	0.000754468	0.65354	1.55955	1.25415	3.26167e-06	0.175	0.366	0.191	1.15419e-05	1.15419e-05	FALSE	0.999997	TRUE	no	yes	TRUE	0
uc001viv.1	chr13:73302042..73330328,+	BRCA_ctrl	BRCA_cancer	C13orf34	2.08331	3.36891	0.685404	1.13142e-16	0.852442	1.78227	1.06317	2.35588e-11	0.393	0.497	0.104	1.53417e-05	1.53417e-05	FALSE	0.999997	TRUE	no	yes	NA	0
uc001vkk.1	chr13:78272470..78338377,+	BRCA_ctrl	BRCA_cancer	SLAIN1	3.12448	1.61069	-0.970892	4.25338e-09	1.65495	0.677894	-1.2864	6.18866e-05	0.53	0.308	-0.221	4.85894e-08	4.85894e-08	FALSE	0.996386	TRUE	no	yes	NA	0
uc001vkm.2	chr13:78272470..78338377,+	BRCA_ctrl	BRCA_cancer	SLAIN1	3.12448	1.61069	-0.970892	4.25338e-09	1.28553	0.795613	-0.691564	0.00460477	0.387	0.462	0.075	1	4.85894e-08	FALSE	0.988015	TRUE	no	yes	NA	0
uc001vmz.2	chr13:97874574..98046372,+	BRCA_ctrl	BRCA_cancer	MBNL2	37.1217	16.1614	-1.21848	2.62052e-57	4.60673	2.91997	-0.657697	4.13531e-07	0.133	0.171	0.038	1	7.55084e-10	FALSE	0.999189	TRUE	no	yes	TRUE	1
uc001vna.2	chr13:97874574..98046372,+	BRCA_ctrl	BRCA_cancer	MBNL2	37.1217	16.1614	-1.21848	2.62052e-57	22.2842	5.68803	-1.9699	7.40638e-53	0.583	0.34	-0.243	7.55084e-10	7.55084e-10	FALSE	0.997744	TRUE	no	yes	TRUE	1
uc001vnb.2	chr13:97874574..98046372,+	BRCA_ctrl	BRCA_cancer	MBNL2	37.1217	16.1614	-1.21848	2.62052e-57	1.10204	1.49539	0.440125	0.0731372	0.032	0.082	0.05	1	7.55084e-10	NA	0.905952	TRUE	NA	NA	TRUE	0
uc010tij.1	chr13:97874574..98046372,+	BRCA_ctrl	BRCA_cancer	MBNL2	37.1217	16.1614	-1.21848	2.62052e-57	8.64563	5.45085	-0.665486	8.80805e-07	0.239	0.379	0.14	1	7.55084e-10	FALSE	0.479528	TRUE	no	no	TRUE	0
uc001yhe.1	chr14:100800125..100842680,-	BRCA_ctrl	BRCA_cancer	WARS	52.6336	66.2169	0.275129	0.00585584	12.034	22.9961	0.934225	9.75474e-12	0.226	0.33	0.104	1	4.15261e-09	FALSE	0.999725	TRUE	no	yes	TRUE	0
uc001yhf.1	chr14:100800125..100842680,-	BRCA_ctrl	BRCA_cancer	WARS	52.6336	66.2169	0.275129	0.00585584	4.62552	4.32307	-0.0974683	0.740677	0.082	0.054	-0.027	1	4.15261e-09	FALSE	0.999999	TRUE	no	yes	TRUE	0
uc001yhg.1	chr14:100800125..100842680,-	BRCA_ctrl	BRCA_cancer	WARS	52.6336	66.2169	0.275129	0.00585584	2.79746	3.84266	0.457884	0.419638	0.052	0.046	-0.006	1	4.15261e-09	FALSE	0.999999	TRUE	no	yes	TRUE	0
uc001yhh.1	chr14:100800125..100842680,-	BRCA_ctrl	BRCA_cancer	WARS	52.6336	66.2169	0.275129	0.00585584	13.8832	10.6096	-0.387904	0.0427459	0.233	0.114	-0.119	4.15261e-09	4.15261e-09	FALSE	0.999999	TRUE	no	yes	TRUE	0
uc001yhi.1	chr14:100800125..100842680,-	BRCA_ctrl	BRCA_cancer	WARS	52.6336	66.2169	0.275129	0.00585584	1.00909	1.02308	0.0202774	0.978843	0.017	0.011	-0.006	1	4.15261e-09	FALSE	0.999994	TRUE	no	yes	TRUE	0
uc001yhk.1	chr14:100800125..100842680,-	BRCA_ctrl	BRCA_cancer	WARS	52.6336	66.2169	0.275129	0.00585584	1.88202	3.00566	0.674908	6.35675e-06	0.04	0.059	0.019	1	4.15261e-09	FALSE	0.999995	TRUE	no	yes	TRUE	0
uc001yhl.1	chr14:100800125..100842680,-	BRCA_ctrl	BRCA_cancer	WARS	52.6336	66.2169	0.275129	0.00585584	15.388	19.4999	0.341649	0.00422262	0.329	0.37	0.041	1	4.15261e-09	FALSE	0.999999	TRUE	no	yes	TRUE	0
uc001yhm.2	chr14:100842755..100996638,+	BRCA_ctrl	BRCA_cancer	WDR25	5.24911	6.36867	0.183995	0.00196454	1.47317	1.60123	0.120185	0.748124	0.279	0.256	-0.024	1	4.96331e-08	FALSE	0.999998	TRUE	no	yes	TRUE	1
uc001yho.2	chr14:100842755..100996638,+	BRCA_ctrl	BRCA_cancer	WDR25	5.24911	6.36867	0.183995	0.00196454	1.60477	2.88388	0.845374	3.77474e-14	0.287	0.428	0.141	4.96331e-08	4.96331e-08	FALSE	0.9987	TRUE	yes	yes	TRUE	0
uc010avx.2	chr14:100842755..100996638,+	BRCA_ctrl	BRCA_cancer	WDR25	5.24911	6.36867	0.183995	0.00196454	1.55322	1.16857	-0.410089	0.247522	0.311	0.195	-0.116	0.00396014	4.96331e-08	FALSE	0.999998	TRUE	no	yes	TRUE	0
uc001yhs.3	chr14:101193253..101201474,+	BRCA_ctrl	BRCA_cancer	DLK1	8.39083	16.1195	0.93902	0.117061	8.3244	15.7569	0.920448	0.206924	0.981	0.752	-0.229	0.000239746	0.000239746	FALSE	0.999986	TRUE	yes	yes	NA	NA
uc001ykj.3	chr14:102228135..102394326,+	BRCA_ctrl	BRCA_cancer	PPP2R5C	38.6781	38.3926	-0.252127	1.55236e-09	1.7165	1.88896	0.13916	0.101602	0.045	0.052	0.007	1	4.34457e-17	FALSE	0.0431196	FALSE	no	no	NA	0
uc001ykk.2	chr14:102228135..102394326,+	BRCA_ctrl	BRCA_cancer	PPP2R5C	38.6781	38.3926	-0.252127	1.55236e-09	10.8389	8.34205	-0.377687	6.38381e-06	0.278	0.218	-0.061	1	4.34457e-17	FALSE	0.999997	TRUE	no	yes	NA	0
uc001ykn.2	chr14:102228135..102394326,+	BRCA_ctrl	BRCA_cancer	PPP2R5C	38.6781	38.3926	-0.252127	1.55236e-09	13.4074	19.6213	0.54928	3.30179e-16	0.346	0.497	0.151	4.34457e-17	4.34457e-17	FALSE	0.999954	TRUE	no	yes	NA	0
uc001yko.2	chr14:102228135..102394326,+	BRCA_ctrl	BRCA_cancer	PPP2R5C	38.6781	38.3926	-0.252127	1.55236e-09	7.72811	4.51512	-0.775184	1.00749e-23	0.201	0.123	-0.078	1	4.34457e-17	FALSE	0.999997	TRUE	no	yes	NA	0
uc001ykp.2	chr14:102228135..102394326,+	BRCA_ctrl	BRCA_cancer	PPP2R5C	38.6781	38.3926	-0.252127	1.55236e-09	3.90384	2.73102	-0.515404	0.0820285	0.102	0.078	-0.024	1	4.34457e-17	FALSE	0.999988	TRUE	no	yes	NA	0
uc001ymw.3	chr14:103851701..103970164,+	BRCA_ctrl	BRCA_cancer	MARK3	19.762	19.1248	-0.00749431	0.929862	8.70017	11.5457	0.408049	6.73187e-17	0.448	0.604	0.156	6.39476e-17	6.39476e-17	FALSE	1	TRUE	no	yes	NA	0
uc001ymz.3	chr14:103851701..103970164,+	BRCA_ctrl	BRCA_cancer	MARK3	19.762	19.1248	-0.00749431	0.929862	1.42327	0.00271389	-8.73746	2.59577e-18	0.064	0	-0.064	1	6.39476e-17	FALSE	1	TRUE	no	yes	NA	0
uc010tyb.1	chr14:103851701..103970164,+	BRCA_ctrl	BRCA_cancer	MARK3	19.762	19.1248	-0.00749431	0.929862	7.22596	5.67982	-0.34743	2.23239e-12	0.365	0.299	-0.066	1	6.39476e-17	FALSE	0.999999	TRUE	no	yes	NA	0
uc001ynx.3	chr14:104163955..104181823,-	BRCA_ctrl	BRCA_cancer	XRCC3	3.31112	4.96683	0.596558	2.72106e-16	0.522947	1.775	1.76148	1.82332e-09	0.17	0.355	0.185	2.88872e-06	1.40558e-06	FALSE	0.999954	TRUE	no	yes	FALSE	0
uc001yny.3	chr14:104163955..104181823,-	BRCA_ctrl	BRCA_cancer	XRCC3	3.31112	4.96683	0.596558	2.72106e-16	0.951885	1.67713	0.816453	0.0139848	0.273	0.327	0.053	1	1.40558e-06	FALSE	0.999954	TRUE	no	yes	FALSE	0
uc001ynz.3	chr14:104163955..104181823,-	BRCA_ctrl	BRCA_cancer	XRCC3	3.31112	4.96683	0.596558	2.72106e-16	1.6693	1.33235	-0.325178	0.429345	0.504	0.28	-0.224	1.40558e-06	1.40558e-06	FALSE	0.999954	TRUE	no	yes	FALSE	0
uc001yqx.2	chr14:105886186..105937048,+	BRCA_ctrl	BRCA_cancer	MTA1	20.1499	23.9521	0.198478	0.000619524	10.3951	7.06413	-0.557233	5.48692e-05	0.516	0.329	-0.187	3.30924e-10	4.22063e-11	FALSE	1	TRUE	no	yes	TRUE	0
uc001yqy.2	chr14:105886186..105937048,+	BRCA_ctrl	BRCA_cancer	MTA1	20.1499	23.9521	0.198478	0.000619524	2.04033	3.25585	0.674026	3.58782e-05	0.099	0.131	0.032	1	4.22063e-11	NA	0.999998	TRUE	NA	NA	TRUE	0
uc001yra.1	chr14:105886186..105937048,+	BRCA_ctrl	BRCA_cancer	MTA1	20.1499	23.9521	0.198478	0.000619524	3.40656	3.12719	-0.123044	0.309869	0.169	0.138	-0.031	1	4.22063e-11	FALSE	0.99947	TRUE	no	yes	TRUE	0
uc001yrb.2	chr14:105886186..105937048,+	BRCA_ctrl	BRCA_cancer	MTA1	20.1499	23.9521	0.198478	0.000619524	3.92034	10.2465	1.38579	5.81741e-22	0.197	0.391	0.193	4.22063e-11	4.22063e-11	FALSE	1	TRUE	no	yes	TRUE	0
uc001yrm.2	chr14:105956192..105965584,+	BRCA_ctrl	BRCA_cancer	C14orf80	2.23794	6.81041	1.6238	4.17337e-45	0.560044	1.72674	1.6215	6.18071e-37	0.276	0.263	-0.012	1	1.65948e-08	FALSE	0.999999	TRUE	no	yes	NA	0
uc001yrn.2	chr14:105956192..105965584,+	BRCA_ctrl	BRCA_cancer	C14orf80	2.23794	6.81041	1.6238	4.17337e-45	0.802779	3.22605	2.00505	1.17491e-47	0.338	0.468	0.13	1.65948e-08	1.65948e-08	FALSE	0.999995	TRUE	no	yes	NA	0
uc001ysh.1	chr14:106230841..106239113,-	BRCA_ctrl	BRCA_cancer	FLJ00385	4.49994	41.4222	3.20581	1.69855e-20	3.10412	22.0437	2.82789	5.72769e-06	0.078	0.357	0.279	3.90713e-06	3.90713e-06	NA	0.999787	TRUE	NA	NA	TRUE	0
uc001ysi.1	chr14:106230841..106239113,-	BRCA_ctrl	BRCA_cancer	FLJ00385	4.49994	41.4222	3.20581	1.69855e-20	1.39581	19.3785	3.79464	4.88941e-23	0.922	0.643	-0.279	3.90713e-06	3.90713e-06	NA	0.999787	TRUE	NA	NA	TRUE	1
uc001wep.2	chr14:22293656..23021096,+	BRCA_ctrl	BRCA_cancer	TCRA	9.4687	23.1271	1.45784	5.92523e-14	0.293336	1.04306	1.82255	0.137657	0.017	0.025	0.008	1	0.00319129	FALSE	0.543021	TRUE	no	yes	NA	0
uc001wfn.2	chr14:22293656..23021096,+	BRCA_ctrl	BRCA_cancer	TCRA	9.4687	23.1271	1.45784	5.92523e-14	0.534407	1.23013	1.19892	0.00559468	0.053	0.079	0.026	1	0.00319129	FALSE	0.542388	TRUE	no	yes	NA	0
uc001wge.3	chr14:22293656..23021096,+	BRCA_ctrl	BRCA_cancer	TCRA	9.4687	23.1271	1.45784	5.92523e-14	0.43908	1.42202	1.69048	0.0326732	0.039	0.044	0.005	1	0.00319129	FALSE	0.543006	TRUE	no	yes	NA	0
uc001wgh.2	chr14:22293656..23021096,+	BRCA_ctrl	BRCA_cancer	TCRA	9.4687	23.1271	1.45784	5.92523e-14	0.300752	1.93015	2.67332	0.000266188	0.034	0.063	0.029	1	0.00319129	FALSE	0.542991	TRUE	no	yes	NA	0
uc010tmw.1	chr14:22293656..23021096,+	BRCA_ctrl	BRCA_cancer	TCRA	9.4687	23.1271	1.45784	5.92523e-14	2.78903	2.64568	-0.0761002	0.837631	0.356	0.198	-0.158	0.00319129	0.00319129	FALSE	0.551401	TRUE	no	yes	NA	0
uc001weq.2	chr14:22615949..23021096,+	BRCA_ctrl	BRCA_cancer	TRA@	7.16616	5.25235	-0.424137	0.0270842	0.719947	1.82849	1.34203	0.0387879	0.107	0.333	0.226	0.000760992	3.09404e-09	FALSE	0.851969	TRUE	no	yes	FALSE	0
uc001wev.2	chr14:22615949..23021096,+	BRCA_ctrl	BRCA_cancer	TRA@	7.16616	5.25235	-0.424137	0.0270842	6.35988	2.50092	-1.34576	0.000507694	0.845	0.404	-0.44	3.09404e-09	3.09404e-09	FALSE	0.833809	TRUE	no	yes	FALSE	0
uc001wgr.3	chr14:23242434..23289014,-	BRCA_ctrl	BRCA_cancer	SLC7A7	6.52411	9.18807	0.475529	1.38518e-06	1.44616	3.71248	1.35968	2.63684e-12	0.216	0.421	0.205	0.000722787	1.66161e-11	FALSE	0.999999	TRUE	no	yes	FALSE	0
uc001wgs.3	chr14:23242434..23289014,-	BRCA_ctrl	BRCA_cancer	SLC7A7	6.52411	9.18807	0.475529	1.38518e-06	1.6011	2.86253	0.837902	0.00198503	0.207	0.291	0.083	1	1.66161e-11	FALSE	0.999999	TRUE	no	yes	FALSE	0
uc001wgt.3	chr14:23242434..23289014,-	BRCA_ctrl	BRCA_cancer	SLC7A7	6.52411	9.18807	0.475529	1.38518e-06	0.613106	1.01037	0.720244	4.18976e-06	0.096	0.102	0.006	1	1.66161e-11	FALSE	0.999999	TRUE	no	yes	FALSE	1
uc001wgu.3	chr14:23242434..23289014,-	BRCA_ctrl	BRCA_cancer	SLC7A7	6.52411	9.18807	0.475529	1.38518e-06	1.78894	1.09641	-0.705624	0.000206946	0.294	0.12	-0.174	1.66161e-11	1.66161e-11	FALSE	0.999999	TRUE	no	yes	FALSE	0
uc001wgv.3	chr14:23242434..23289014,-	BRCA_ctrl	BRCA_cancer	SLC7A7	6.52411	9.18807	0.475529	1.38518e-06	1.07481	0.506283	-1.08444	9.73032e-08	0.187	0.066	-0.121	2.00708e-11	1.66161e-11	FALSE	0.999999	TRUE	no	yes	FALSE	0
uc001wix.2	chr14:23594506..23652849,-	BRCA_ctrl	BRCA_cancer	SLC7A8	20.2056	41.3428	1.05978	4.06316e-15	10.9875	15.7802	0.522233	8.76882e-05	0.559	0.425	-0.134	2.8243e-07	2.8243e-07	FALSE	0.999906	TRUE	no	yes	NA	0
uc001wiz.2	chr14:23594506..23652849,-	BRCA_ctrl	BRCA_cancer	SLC7A8	20.2056	41.3428	1.05978	4.06316e-15	7.35933	18.5721	1.33541	3.18861e-08	0.347	0.389	0.042	1	2.8243e-07	FALSE	1	TRUE	no	yes	NA	0
uc010tnk.1	chr14:23594506..23652849,-	BRCA_ctrl	BRCA_cancer	SLC7A8	20.2056	41.3428	1.05978	4.06316e-15	0.676903	2.37451	1.80948	1.81771e-09	0.034	0.063	0.029	1	2.8243e-07	FALSE	0.999784	TRUE	no	yes	NA	0
uc001wjg.3	chr14:23776012..23780966,+	BRCA_ctrl	BRCA_cancer	BCL2L2	28.3692	13.7779	-1.04689	4.46049e-98	11.3978	1.02732	-3.47102	1.80677e-10	0.318	0.052	-0.266	5.10039e-12	5.10039e-12	FALSE	0.977866	TRUE	no	yes	FALSE	0
uc001wji.3	chr14:23776012..23780966,+	BRCA_ctrl	BRCA_cancer	BCL2L2	28.3692	13.7779	-1.04689	4.46049e-98	16.9714	12.7506	-0.412538	1.7947e-09	0.682	0.948	0.266	5.10039e-12	5.10039e-12	FALSE	0.977916	TRUE	no	yes	FALSE	0
uc001wkj.2	chr14:24028777..24037279,-	BRCA_ctrl	BRCA_cancer	AP1G2	17.5277	27.03	0.661186	1.81307e-18	3.39312	3.83483	0.17605	0.135952	0.189	0.141	-0.048	1	1.03922e-15	FALSE	0.999993	TRUE	no	yes	NA	1
uc001wkk.3	chr14:24028777..24037279,-	BRCA_ctrl	BRCA_cancer	AP1G2	17.5277	27.03	0.661186	1.81307e-18	2.89787	4.99011	0.78342	3.87393e-11	0.17	0.176	0.006	1	1.03922e-15	FALSE	1	TRUE	no	yes	NA	1
uc001wkl.2	chr14:24028777..24037279,-	BRCA_ctrl	BRCA_cancer	AP1G2	17.5277	27.03	0.661186	1.81307e-18	7.47901	13.9495	0.899126	1.42623e-20	0.422	0.524	0.102	1.03922e-15	1.03922e-15	FALSE	1	TRUE	no	yes	NA	0
uc001wkp.1	chr14:24028777..24037279,-	BRCA_ctrl	BRCA_cancer	AP1G2	17.5277	27.03	0.661186	1.81307e-18	1.29145	1.38956	0.104679	0.371207	0.076	0.051	-0.025	1	1.03922e-15	NA	0.702661	TRUE	NA	NA	NA	0
uc010aks.2	chr14:24028777..24037279,-	BRCA_ctrl	BRCA_cancer	AP1G2	17.5277	27.03	0.661186	1.81307e-18	1.04391	1.128	0.110744	0.415357	0.057	0.041	-0.016	1	1.03922e-15	FALSE	0.938498	TRUE	no	yes	NA	2
uc010tnp.1	chr14:24028777..24037279,-	BRCA_ctrl	BRCA_cancer	AP1G2	17.5277	27.03	0.661186	1.81307e-18	1.28332	1.59807	0.315019	0.00349399	0.078	0.061	-0.018	1	1.03922e-15	FALSE	0.999999	TRUE	no	yes	NA	1
uc001wkx.2	chr14:24407940..24424298,-	BRCA_ctrl	BRCA_cancer	C14orf167	13.4608	14.9692	0.153435	0.0627219	1.70572	2.00979	0.236903	0.0701869	0.128	0.13	0.002	1	2.86582e-14	NA	0.259072	FALSE	NA	NA	NA	1
uc001wky.2	chr14:24407940..24424298,-	BRCA_ctrl	BRCA_cancer	C14orf167	13.4608	14.9692	0.153435	0.0627219	4.5902	4.20597	-0.126052	0.575156	0.342	0.301	-0.042	1	2.86582e-14	NA	0.250053	FALSE	NA	NA	NA	1
uc001wkz.2	chr14:24407940..24424298,-	BRCA_ctrl	BRCA_cancer	C14orf167	13.4608	14.9692	0.153435	0.0627219	5.89729	5.00795	-0.235788	0.240829	0.438	0.34	-0.097	1	2.86582e-14	NA	0.25109	FALSE	NA	NA	NA	0
uc010akx.1	chr14:24407940..24424298,-	BRCA_ctrl	BRCA_cancer	C14orf167	13.4608	14.9692	0.153435	0.0627219	1.26757	3.74553	1.56218	3.36718e-18	0.092	0.229	0.136	2.86582e-14	2.86582e-14	NA	0.00106641	FALSE	NA	NA	NA	0
uc001wpc.2	chr14:24836145..24848808,+	BRCA_ctrl	BRCA_cancer	NFATC4	6.65045	11.7014	0.724859	2.58208e-09	0.988938	1.43565	0.537572	0.0566106	0.149	0.155	0.007	1	2.70964e-07	FALSE	1	TRUE	no	yes	NA	0
uc001wpd.2	chr14:24836145..24848808,+	BRCA_ctrl	BRCA_cancer	NFATC4	6.65045	11.7014	0.724859	2.58208e-09	0.103903	1.57679	3.91563	6.46172e-07	0.014	0.072	0.058	1	2.70964e-07	FALSE	0.999988	TRUE	no	yes	NA	0
uc010tom.1	chr14:24836145..24848808,+	BRCA_ctrl	BRCA_cancer	NFATC4	6.65045	11.7014	0.724859	2.58208e-09	2.25625	1.87919	-0.263759	0.249665	0.334	0.222	-0.112	2.70964e-07	2.70964e-07	FALSE	1	TRUE	no	yes	NA	1
uc010tos.1	chr14:24836145..24848808,+	BRCA_ctrl	BRCA_cancer	NFATC4	6.65045	11.7014	0.724859	2.58208e-09	0.984894	1.07018	0.119729	0.806459	0.148	0.111	-0.036	1	2.70964e-07	FALSE	1	TRUE	no	yes	NA	0
uc010toz.1	chr14:24836145..24848808,+	BRCA_ctrl	BRCA_cancer	NFATC4	6.65045	11.7014	0.724859	2.58208e-09	0.236168	1.89343	2.99971	1.25163e-09	0.036	0.097	0.06	1	2.70964e-07	FALSE	0.99998	TRUE	no	yes	NA	1
uc001wpy.2	chr14:26915090..27066960,-	BRCA_ctrl	BRCA_cancer	NOVA1	10.4455	6.88304	-0.780978	8.01114e-05	5.16561	2.78372	-0.891764	0.00017049	0.502	0.473	-0.029	1	3.24978e-09	FALSE	0.999997	TRUE	no	yes	NA	0
uc001wqa.2	chr14:26915090..27066960,-	BRCA_ctrl	BRCA_cancer	NOVA1	10.4455	6.88304	-0.780978	8.01114e-05	2.76264	1.42442	-0.95539	0.00521161	0.261	0.141	-0.12	3.24978e-09	3.24978e-09	FALSE	0.999831	TRUE	no	yes	NA	0
uc001wqb.2	chr14:26915090..27066960,-	BRCA_ctrl	BRCA_cancer	NOVA1	10.4455	6.88304	-0.780978	8.01114e-05	2.4723	2.59387	0.0692583	0.857706	0.233	0.283	0.051	1	3.24978e-09	FALSE	0.930489	TRUE	no	yes	NA	0
uc001wtj.2	chr14:36007559..36278432,-	BRCA_ctrl	BRCA_cancer	RALGAPA1	5.86635	5.95179	-0.0373183	0.683405	0.535699	1.50654	1.49128	1.07056e-07	0.089	0.22	0.132	4.25129e-12	4.25129e-12	FALSE	1	TRUE	no	yes	NA	0
uc010amp.2	chr14:36007559..36278432,-	BRCA_ctrl	BRCA_cancer	RALGAPA1	5.86635	5.95179	-0.0373183	0.683405	3.49465	3.91842	0.165036	0.0145459	0.616	0.684	0.068	1	4.25129e-12	NA	1	TRUE	NA	NA	NA	0
uc001wwn.2	chr14:50065415..50081389,+	BRCA_ctrl	BRCA_cancer	PPIL5	4.68704	7.76122	0.61371	4.7559e-21	3.6328	4.69315	0.369911	1.70974e-08	0.776	0.62	-0.156	2.75415e-15	2.20182e-15	FALSE	0.999267	TRUE	no	yes	TRUE	0
uc001wwo.2	chr14:50065415..50081389,+	BRCA_ctrl	BRCA_cancer	PPIL5	4.68704	7.76122	0.61371	4.7559e-21	0.861115	2.75082	1.67357	6.6498e-57	0.184	0.34	0.156	2.20182e-15	2.20182e-15	FALSE	0.491189	TRUE	no	no	TRUE	0
uc001wwu.2	chr14:50110278..50154935,-	BRCA_ctrl	BRCA_cancer	POLE2	1.04588	3.44417	1.80659	6.24262e-65	0.52754	2.30178	2.12068	5.02674e-44	0.484	0.64	0.156	5.85542e-06	5.85542e-06	FALSE	0.999989	TRUE	no	yes	NA	NA
uc001www.2	chr14:50159885..50219862,+	BRCA_ctrl	BRCA_cancer	KLHDC1	2.55958	1.05617	-1.27744	1.33721e-50	2.42136	0.858903	-1.49406	3.95696e-14	0.95	0.703	-0.246	4.96449e-05	4.96449e-05	FALSE	0.999154	TRUE	no	yes	NA	NA
uc001wxu.2	chr14:50704287..50778947,-	BRCA_ctrl	BRCA_cancer	L2HGDH	2.35367	3.11743	0.261412	0.00039592	1.5465	1.73454	0.166492	0.0299266	0.688	0.576	-0.111	3.87376e-14	3.52579e-14	FALSE	0.999963	TRUE	no	yes	TRUE	1
uc010tqo.1	chr14:50704287..50778947,-	BRCA_ctrl	BRCA_cancer	L2HGDH	2.35367	3.11743	0.261412	0.00039592	0.798867	1.37806	0.791237	4.39608e-14	0.307	0.422	0.115	3.52579e-14	3.52579e-14	FALSE	0.999971	TRUE	no	yes	TRUE	0
uc001wyi.2	chr14:51186482..51297839,-	BRCA_ctrl	BRCA_cancer	NIN	8.29672	8.31699	-0.16833	0.00861995	4.71889	2.69297	-0.80912	2.33759e-13	0.55	0.315	-0.235	4.00775e-13	2.61861e-16	FALSE	1	TRUE	no	no	TRUE	0
uc001wyj.2	chr14:51186482..51297839,-	BRCA_ctrl	BRCA_cancer	NIN	8.29672	8.31699	-0.16833	0.00861995	2.29512	3.36223	0.550592	8.08157e-12	0.295	0.419	0.123	1	2.61861e-16	NA	1	TRUE	NA	NA	TRUE	0
uc001wyk.2	chr14:51186482..51297839,-	BRCA_ctrl	BRCA_cancer	NIN	8.29672	8.31699	-0.16833	0.00861995	0.67854	1.70313	1.32666	3.14073e-30	0.08	0.193	0.113	2.61861e-16	2.61861e-16	FALSE	1	TRUE	no	yes	TRUE	0
uc001xap.2	chr14:54863673..54886932,+	BRCA_ctrl	BRCA_cancer	CDKN3	1.38483	10.7092	2.99736	4.24524e-107	0.86023	9.12303	3.40294	2.54922e-89	0.499	0.826	0.327	2.44922e-09	2.44922e-09	FALSE	0.728148	TRUE	no	yes	TRUE	0
uc001xar.2	chr14:54863673..54886932,+	BRCA_ctrl	BRCA_cancer	CDKN3	1.38483	10.7092	2.99736	4.24524e-107	0.457009	1.35943	1.56569	6.42318e-11	0.425	0.155	-0.27	3.89076e-08	2.44922e-09	FALSE	0.348922	FALSE	no	yes	TRUE	0
uc001xek.1	chr14:60062694..60337557,-	BRCA_ctrl	BRCA_cancer	RTN1	10.782	9.88627	-0.498214	0.00139035	4.04201	7.3066	0.853875	0.00101716	0.356	0.522	0.166	1.67624e-10	1.01201e-12	FALSE	0.994187	TRUE	no	yes	TRUE	0
uc001xen.1	chr14:60062694..60337557,-	BRCA_ctrl	BRCA_cancer	RTN1	10.782	9.88627	-0.498214	0.00139035	6.07589	1.93247	-1.65211	1.10253e-43	0.581	0.363	-0.218	1.01201e-12	1.01201e-12	FALSE	1	TRUE	no	yes	TRUE	0
uc001xew.3	chr14:60712470..60765803,+	BRCA_ctrl	BRCA_cancer	PPM1A	15.7447	12.5147	-0.319131	8.8356e-09	2.72765	0.549887	-2.30991	0.00128589	0.159	0.047	-0.112	5.08752e-06	5.08752e-06	FALSE	0.999942	TRUE	no	yes	NA	0
uc001xex.3	chr14:60712470..60765803,+	BRCA_ctrl	BRCA_cancer	PPM1A	15.7447	12.5147	-0.319131	8.8356e-09	4.32418	3.29404	-0.392216	1.35481e-09	0.275	0.263	-0.012	1	5.08752e-06	FALSE	0.997361	TRUE	no	yes	NA	0
uc001xey.3	chr14:60712470..60765803,+	BRCA_ctrl	BRCA_cancer	PPM1A	15.7447	12.5147	-0.319131	8.8356e-09	7.41604	7.03471	-0.0761323	0.667071	0.481	0.559	0.077	1	5.08752e-06	FALSE	0.999626	TRUE	no	yes	NA	0
uc010apn.2	chr14:60712470..60765803,+	BRCA_ctrl	BRCA_cancer	PPM1A	15.7447	12.5147	-0.319131	8.8356e-09	1.27682	1.63603	0.35761	0.199115	0.084	0.131	0.046	1	5.08752e-06	FALSE	0.999627	TRUE	no	yes	NA	0
uc001xfg.1	chr14:61447880..61550450,+	BRCA_ctrl	BRCA_cancer	SLC38A6	4.9101	5.25186	0.0652539	0.323725	2.5435	3.2264	0.343238	1.52403e-05	0.503	0.604	0.101	2.71936e-09	2.71936e-09	FALSE	0.999765	TRUE	no	yes	NA	0
uc001xfh.1	chr14:61447880..61550450,+	BRCA_ctrl	BRCA_cancer	SLC38A6	4.9101	5.25186	0.0652539	0.323725	1.20385	0.929543	-0.371771	0.00588642	0.258	0.182	-0.076	1	2.71936e-09	FALSE	0.999963	TRUE	no	yes	NA	0
uc001xho.1	chr14:65171193..65211060,+	BRCA_ctrl	BRCA_cancer	PLEKHG3	9.97464	10.9069	0.0390375	0.617338	3.5055	3.92923	0.164565	0.154223	0.37	0.381	0.012	1	1.44463e-14	FALSE	1	TRUE	no	yes	TRUE	0
uc001xhp.2	chr14:65171193..65211060,+	BRCA_ctrl	BRCA_cancer	PLEKHG3	9.97464	10.9069	0.0390375	0.617338	3.02492	1.62095	-0.899757	7.97901e-17	0.3	0.146	-0.153	1.44463e-14	1.44463e-14	FALSE	1	TRUE	no	yes	TRUE	0
uc001xhq.1	chr14:65171193..65211060,+	BRCA_ctrl	BRCA_cancer	PLEKHG3	9.97464	10.9069	0.0390375	0.617338	3.25423	5.10079	0.648117	2.13979e-10	0.311	0.447	0.136	1	1.44463e-14	FALSE	1	TRUE	no	no	TRUE	0
uc001xjc.2	chr14:67708021..67802535,+	BRCA_ctrl	BRCA_cancer	MPP5	10.0344	7.69261	-0.390182	4.31333e-09	6.65427	3.7737	-0.818171	6.17238e-12	0.642	0.451	-0.191	9.01805e-08	4.73899e-08	FALSE	1	TRUE	no	yes	FALSE	0
uc001xjd.2	chr14:67708021..67802535,+	BRCA_ctrl	BRCA_cancer	MPP5	10.0344	7.69261	-0.390182	4.31333e-09	3.22315	3.82926	0.248539	0.00191172	0.342	0.536	0.194	4.73899e-08	4.73899e-08	FALSE	1	TRUE	no	yes	FALSE	0
uc001xke.2	chr14:68286509..69196935,+	BRCA_ctrl	BRCA_cancer	RAD51L1	4.05218	2.99408	-0.544608	7.70579e-07	1.03024	1.02578	-0.00699657	0.987344	0.308	0.421	0.113	1.27529e-06	8.706e-12	FALSE	0.998389	TRUE	no	yes	FALSE	0
uc001xkf.1	chr14:68286509..69196935,+	BRCA_ctrl	BRCA_cancer	RAD51L1	4.05218	2.99408	-0.544608	7.70579e-07	2.34099	1.24273	-0.913427	8.35769e-09	0.503	0.29	-0.213	8.706e-12	8.706e-12	FALSE	0.999347	TRUE	no	yes	FALSE	0
uc001xkk.2	chr14:69340841..69446083,-	BRCA_ctrl	BRCA_cancer	ACTN1	124.805	90.0291	-0.384846	4.23795e-08	1.13743	0.860737	-0.403047	1.67654e-06	0.009	0.01	0.001	1	4.34457e-17	FALSE	1	TRUE	no	yes	FALSE	0
uc001xkl.2	chr14:69340841..69446083,-	BRCA_ctrl	BRCA_cancer	ACTN1	124.805	90.0291	-0.384846	4.23795e-08	57.1582	70.1876	0.296242	0.000174896	0.471	0.783	0.312	4.34457e-17	4.34457e-17	FALSE	1	TRUE	no	yes	FALSE	0
uc001xkn.2	chr14:69340841..69446083,-	BRCA_ctrl	BRCA_cancer	ACTN1	124.805	90.0291	-0.384846	4.23795e-08	14.8154	0.0660539	-7.7965	9.98719e-24	0.109	0.001	-0.109	5.65562e-14	4.34457e-17	FALSE	1	TRUE	no	yes	FALSE	0
uc010ttb.1	chr14:69340841..69446083,-	BRCA_ctrl	BRCA_cancer	ACTN1	124.805	90.0291	-0.384846	4.23795e-08	27.9729	8.65619	-1.69221	5.35608e-85	0.23	0.102	-0.128	1.90969e-15	4.34457e-17	FALSE	1	TRUE	no	yes	FALSE	0
uc010ttc.1	chr14:69340841..69446083,-	BRCA_ctrl	BRCA_cancer	ACTN1	124.805	90.0291	-0.384846	4.23795e-08	3.86138	1.85082	-1.06071	1.9044e-29	0.03	0.02	-0.01	1	4.34457e-17	FALSE	1	TRUE	no	yes	FALSE	1
uc010ttd.1	chr14:69340841..69446083,-	BRCA_ctrl	BRCA_cancer	ACTN1	124.805	90.0291	-0.384846	4.23795e-08	19.2456	8.07641	-1.25256	2.82427e-05	0.146	0.08	-0.065	1	4.34457e-17	FALSE	1	TRUE	no	yes	FALSE	0
uc001xny.1	chr14:73741918..73925286,-	BRCA_ctrl	BRCA_cancer	NUMB	29.9938	22.7013	-0.41118	1.99168e-20	0.937336	1.61756	0.786675	0.00804896	0.032	0.068	0.036	1	2.12436e-15	FALSE	1	TRUE	no	yes	FALSE	0
uc001xnz.1	chr14:73741918..73925286,-	BRCA_ctrl	BRCA_cancer	NUMB	29.9938	22.7013	-0.41118	1.99168e-20	2.62301	6.25152	1.25258	1.36965e-15	0.09	0.264	0.174	2.12436e-15	2.12436e-15	FALSE	1	TRUE	no	yes	FALSE	0
uc001xoa.1	chr14:73741918..73925286,-	BRCA_ctrl	BRCA_cancer	NUMB	29.9938	22.7013	-0.41118	1.99168e-20	4.45563	1.02792	-2.11516	2.0238e-14	0.144	0.044	-0.1	1	2.12436e-15	FALSE	1	TRUE	no	yes	FALSE	0
uc001xob.1	chr14:73741918..73925286,-	BRCA_ctrl	BRCA_cancer	NUMB	29.9938	22.7013	-0.41118	1.99168e-20	8.042	1.8015	-2.15792	7.933e-16	0.261	0.078	-0.183	2.31477e-13	2.12436e-15	FALSE	1	TRUE	no	yes	FALSE	0
uc010arq.1	chr14:73741918..73925286,-	BRCA_ctrl	BRCA_cancer	NUMB	29.9938	22.7013	-0.41118	1.99168e-20	1.24559	0.529309	-1.23315	4.23259e-10	0.042	0.023	-0.019	1	2.12436e-15	FALSE	0.999997	TRUE	no	yes	FALSE	0
uc010ttz.1	chr14:73741918..73925286,-	BRCA_ctrl	BRCA_cancer	NUMB	29.9938	22.7013	-0.41118	1.99168e-20	9.34464	8.35579	-0.161581	0.0107626	0.319	0.386	0.066	1	2.12436e-15	FALSE	0.999654	TRUE	no	yes	FALSE	0
uc001xvr.2	chr14:85996488..86094269,+	BRCA_ctrl	BRCA_cancer	FLRT2	7.11355	1.98711	-1.84111	4.51125e-66	3.40218	0.742217	-2.19608	5.12524e-16	0.447	0.316	-0.131	0.000353561	0.000353561	FALSE	1	TRUE	yes	yes	FALSE	0
uc010atd.2	chr14:85996488..86094269,+	BRCA_ctrl	BRCA_cancer	FLRT2	7.11355	1.98711	-1.84111	4.51125e-66	3.71137	1.24489	-1.5758	9.62731e-26	0.553	0.684	0.131	0.000353561	0.000353561	FALSE	1	TRUE	yes	yes	FALSE	0
uc001yac.3	chr14:92524897..92572965,-	BRCA_ctrl	BRCA_cancer	ATXN3	6.45496	6.01042	-0.509857	1.54725e-30	3.73195	2.45705	-0.602799	1.4506e-18	0.579	0.42	-0.16	2.31018e-16	8.66148e-17	FALSE	0.999346	TRUE	no	yes	TRUE	0
uc010twl.1	chr14:92524897..92572965,-	BRCA_ctrl	BRCA_cancer	ATXN3	6.45496	6.01042	-0.509857	1.54725e-30	2.37189	3.29497	0.474628	3.79813e-09	0.363	0.527	0.164	8.66148e-17	8.66148e-17	NA	0.715141	TRUE	NA	NA	TRUE	0
uc001yap.2	chr14:92980125..93155332,+	BRCA_ctrl	BRCA_cancer	RIN3	6.90335	5.63048	-0.308543	4.89728e-05	3.53887	1.8943	-0.901311	5.36508e-10	0.525	0.33	-0.196	7.69964e-09	7.69964e-09	FALSE	1	TRUE	no	yes	FALSE	0
uc001yaq.2	chr14:92980125..93155332,+	BRCA_ctrl	BRCA_cancer	RIN3	6.90335	5.63048	-0.308543	4.89728e-05	2.75914	3.15437	0.193031	0.0613951	0.384	0.566	0.182	3.90332e-07	7.69964e-09	FALSE	1	TRUE	no	yes	FALSE	0
uc001ycx.3	chr14:94843085..94857029,-	BRCA_ctrl	BRCA_cancer	SERPINA1	84.3534	113.178	0.458353	0.0310922	20.6536	26.1438	0.340062	0.338157	0.216	0.112	-0.104	1.56626e-11	1.56626e-11	FALSE	0.999996	TRUE	yes	yes	NA	0
uc001ycz.3	chr14:94843085..94857029,-	BRCA_ctrl	BRCA_cancer	SERPINA1	84.3534	113.178	0.458353	0.0310922	6.78828	11.8661	0.805553	2.63257e-06	0.112	0.212	0.1	1	1.56626e-11	FALSE	0.999996	TRUE	yes	yes	NA	0
uc001yda.1	chr14:94843085..94857029,-	BRCA_ctrl	BRCA_cancer	SERPINA1	84.3534	113.178	0.458353	0.0310922	54.0215	69.2121	0.357462	0.120765	0.627	0.591	-0.036	1	1.56626e-11	FALSE	0.999977	TRUE	yes	yes	NA	0
uc001ydc.3	chr14:94843085..94857029,-	BRCA_ctrl	BRCA_cancer	SERPINA1	84.3534	113.178	0.458353	0.0310922	0.556212	1.17567	1.07849	0.000457409	0.011	0.02	0.009	1	1.56626e-11	FALSE	0.999996	TRUE	yes	yes	NA	0
uc010auz.2	chr14:94843085..94857029,-	BRCA_ctrl	BRCA_cancer	SERPINA1	84.3534	113.178	0.458353	0.0310922	0.88492	1.90335	1.10398	0.000101585	0.012	0.03	0.019	1	1.56626e-11	FALSE	0.999996	TRUE	yes	yes	NA	0
uc002bww.2	chr15:101821717..101835460,-	BRCA_ctrl	BRCA_cancer	SNRPA1	12.9425	25.9995	1.06431	2.40372e-43	10.0982	23.6924	1.23004	2.24789e-51	0.78	0.901	0.121	7.25341e-17	7.25341e-17	FALSE	0.993033	TRUE	no	yes	TRUE	0
uc002bwx.2	chr15:101821717..101835460,-	BRCA_ctrl	BRCA_cancer	SNRPA1	12.9425	25.9995	1.06431	2.40372e-43	2.60969	2.0807	-0.327777	0.000301696	0.202	0.09	-0.113	5.47105e-16	7.25341e-17	NA	0.881782	TRUE	NA	NA	TRUE	0
uc001yvc.2	chr15:23043281..23086843,-	BRCA_ctrl	BRCA_cancer	NIPA1	2.94367	3.9518	0.430675	6.33261e-09	1.13112	2.08244	0.880433	8.95719e-06	0.375	0.494	0.119	5.06421e-06	5.06421e-06	FALSE	0.999898	TRUE	no	yes	TRUE	0
uc001yve.2	chr15:23043281..23086843,-	BRCA_ctrl	BRCA_cancer	NIPA1	2.94367	3.9518	0.430675	6.33261e-09	1.80858	1.86486	0.0441663	0.86127	0.623	0.505	-0.119	5.77957e-06	5.06421e-06	FALSE	0.999156	TRUE	no	yes	TRUE	0
uc010bbm.2	chr15:40509629..40569687,+	BRCA_ctrl	BRCA_cancer	PAK6	2.33055	3.46972	0.55218	6.9496e-06	1.39816	2.9576	1.08035	7.1289e-16	0.662	0.856	0.194	6.45337e-11	6.45337e-11	FALSE	1	TRUE	no	yes	NA	1
uc001znr.3	chr15:41624892..41673247,+	BRCA_ctrl	BRCA_cancer	NUSAP1	2.49986	19.8907	2.98326	9.30191e-114	0.597717	3.97347	2.73121	1.58275e-15	0.209	0.196	-0.012	1	1.8348e-05	FALSE	0.999971	TRUE	no	no	NA	0
uc001zns.3	chr15:41624892..41673247,+	BRCA_ctrl	BRCA_cancer	NUSAP1	2.49986	19.8907	2.98326	9.30191e-114	0.519142	6.04042	3.53774	8.46609e-51	0.184	0.296	0.111	1.8348e-05	1.8348e-05	FALSE	0.999972	TRUE	no	no	NA	0
uc001znt.3	chr15:41624892..41673247,+	BRCA_ctrl	BRCA_cancer	NUSAP1	2.49986	19.8907	2.98326	9.30191e-114	0.583257	3.21703	2.46215	1.80195e-20	0.207	0.161	-0.046	1	1.8348e-05	FALSE	0.99996	TRUE	no	no	NA	0
uc001znw.3	chr15:41624892..41673247,+	BRCA_ctrl	BRCA_cancer	NUSAP1	2.49986	19.8907	2.98326	9.30191e-114	0.482602	4.79353	3.30851	2.5187e-40	0.233	0.258	0.025	1	1.8348e-05	FALSE	0.972987	TRUE	no	no	NA	0
uc001zsz.3	chr15:44084174..44088286,+	BRCA_ctrl	BRCA_cancer	SERF2	153.778	268.678	0.703852	7.23285e-22	40.9821	35.3796	-0.212086	0.00463814	0.29	0.157	-0.133	1.75385e-13	1.75385e-13	FALSE	0.0881371	FALSE	no	yes	NA	1
uc010bdq.2	chr15:44084174..44088286,+	BRCA_ctrl	BRCA_cancer	SERF2	153.778	268.678	0.703852	7.23285e-22	69.7314	140.675	1.01245	6.78706e-25	0.441	0.499	0.057	1	1.75385e-13	FALSE	0.655154	TRUE	no	yes	NA	1
uc010uee.1	chr15:44084174..44088286,+	BRCA_ctrl	BRCA_cancer	SERF2	153.778	268.678	0.703852	7.23285e-22	43.0647	92.6235	1.10486	6.11826e-32	0.268	0.344	0.076	1	1.75385e-13	FALSE	0.196085	FALSE	no	no	NA	0
uc001ztp.2	chr15:44580929..44707955,+	BRCA_ctrl	BRCA_cancer	CASC4	39.2511	36.0533	-0.128767	0.0445877	21.0939	15.4931	-0.445157	2.44947e-07	0.539	0.416	-0.124	1.33402e-12	1.33402e-12	FALSE	0.999992	TRUE	no	no	TRUE	0
uc001ztq.2	chr15:44580929..44707955,+	BRCA_ctrl	BRCA_cancer	CASC4	39.2511	36.0533	-0.128767	0.0445877	18.0143	20.4553	0.183308	0.00523371	0.457	0.581	0.124	1.33402e-12	1.33402e-12	FALSE	0.99995	TRUE	no	no	TRUE	0
uc001zvz.2	chr15:47476403..48066419,+	BRCA_ctrl	BRCA_cancer	SEMA6D	5.69119	1.77799	-1.67618	2.35962e-33	1.44933	0.504688	-1.52123	7.86792e-05	0.253	0.152	-0.101	1	0.00134809	FALSE	1	TRUE	yes	yes	NA	0
uc010bek.2	chr15:47476403..48066419,+	BRCA_ctrl	BRCA_cancer	SEMA6D	5.69119	1.77799	-1.67618	2.35962e-33	3.38583	0.64414	-2.39339	2.82625e-41	0.581	0.428	-0.153	0.00134809	0.00134809	FALSE	1	TRUE	yes	yes	NA	0
uc001zws.2	chr15:48623621..48635568,+	BRCA_ctrl	BRCA_cancer	DUT	21.178	24.8042	0.197078	0.000352403	10.4022	8.18065	-0.34651	3.22221e-05	0.501	0.342	-0.159	3.48919e-12	7.66048e-15	FALSE	0.976798	TRUE	no	yes	TRUE	0
uc001zwt.2	chr15:48623621..48635568,+	BRCA_ctrl	BRCA_cancer	DUT	21.178	24.8042	0.197078	0.000352403	2.44689	0.550367	-2.14993	4.28271e-06	0.1	0.023	-0.077	1	7.66048e-15	FALSE	0.751234	TRUE	no	yes	TRUE	0
uc001zww.2	chr15:48623621..48635568,+	BRCA_ctrl	BRCA_cancer	DUT	21.178	24.8042	0.197078	0.000352403	6.65756	13.9486	1.06679	9.79156e-31	0.321	0.551	0.23	7.66048e-15	7.66048e-15	FALSE	0.858816	TRUE	no	yes	TRUE	0
uc001zya.2	chr15:50569390..50647605,-	BRCA_ctrl	BRCA_cancer	GABPB1	7.12733	9.2615	0.340594	5.30688e-11	4.19904	4.30546	0.0360517	0.725698	0.588	0.474	-0.115	8.75858e-09	8.75858e-09	FALSE	0.999865	TRUE	no	yes	NA	0
uc001zyb.2	chr15:50569390..50647605,-	BRCA_ctrl	BRCA_cancer	GABPB1	7.12733	9.2615	0.340594	5.30688e-11	1.91905	3.08418	0.684271	3.95307e-06	0.273	0.32	0.047	1	8.75858e-09	FALSE	0.999907	TRUE	no	yes	NA	0
uc002acq.2	chr15:55495802..55582001,-	BRCA_ctrl	BRCA_cancer	RAB27A	9.64653	8.31109	-0.21203	0.00649844	2.53421	0.911943	-1.47377	0.00537727	0.287	0.157	-0.13	0.0249098	0.0249098	FALSE	0.92884	TRUE	no	yes	FALSE	0
uc002acr.2	chr15:55495802..55582001,-	BRCA_ctrl	BRCA_cancer	RAB27A	9.64653	8.31109	-0.21203	0.00649844	6.59276	6.83762	0.0525668	0.818745	0.657	0.767	0.109	1	0.0249098	FALSE	0.928692	TRUE	no	yes	FALSE	0
uc002adp.2	chr15:56657644..56738071,+	BRCA_ctrl	BRCA_cancer	TEX9	2.79289	3.01447	0.0125562	0.994285	1.72195	2.35396	0.449737	0.000673485	0.569	0.756	0.186	1.80409e-10	1.80409e-10	FALSE	0.999674	TRUE	no	no	NA	0
uc002aeb.2	chr15:57210323..57580712,+	BRCA_ctrl	BRCA_cancer	TCF12	23.9223	20.2126	-0.286865	1.4732e-06	0.525858	2.47372	2.23259	1.65171e-15	0.021	0.111	0.09	1	1.11049e-11	FALSE	1	TRUE	no	yes	NA	0
uc002aed.2	chr15:57210323..57580712,+	BRCA_ctrl	BRCA_cancer	TCF12	23.9223	20.2126	-0.286865	1.4732e-06	12.8478	6.65883	-0.948109	3.172e-11	0.523	0.306	-0.218	1.11049e-11	1.11049e-11	FALSE	1	TRUE	no	yes	NA	0
uc002aee.2	chr15:57210323..57580712,+	BRCA_ctrl	BRCA_cancer	TCF12	23.9223	20.2126	-0.286865	1.4732e-06	6.45122	5.88563	-0.132313	0.336354	0.265	0.269	0.003	1	1.11049e-11	FALSE	0.999993	TRUE	no	yes	NA	0
uc010ugp.1	chr15:57210323..57580712,+	BRCA_ctrl	BRCA_cancer	TCF12	23.9223	20.2126	-0.286865	1.4732e-06	1.08268	1.12459	0.0547942	0.857857	0.043	0.052	0.009	1	1.11049e-11	FALSE	0.998249	TRUE	no	yes	NA	0
uc010ugq.1	chr15:57210323..57580712,+	BRCA_ctrl	BRCA_cancer	TCF12	23.9223	20.2126	-0.286865	1.4732e-06	1.44735	1.93649	0.419831	0.272161	0.072	0.117	0.045	1	1.11049e-11	FALSE	0.996771	TRUE	no	yes	NA	0
uc002ago.2	chr15:60711809..60771344,-	BRCA_ctrl	BRCA_cancer	NARG2	9.80876	7.31237	-0.391543	3.13165e-11	4.50158	2.48991	-0.854179	4.41629e-14	0.446	0.323	-0.123	2.76354e-09	2.76354e-09	FALSE	1	TRUE	no	yes	TRUE	0
uc002agp.2	chr15:60711809..60771344,-	BRCA_ctrl	BRCA_cancer	NARG2	9.80876	7.31237	-0.391543	3.13165e-11	3.22159	3.35301	0.0576663	0.440125	0.357	0.503	0.146	1	2.76354e-09	FALSE	1	TRUE	no	yes	TRUE	0
uc002agr.1	chr15:60711809..60771344,-	BRCA_ctrl	BRCA_cancer	NARG2	9.80876	7.31237	-0.391543	3.13165e-11	1.2099	0.699572	-0.788481	3.7353e-05	0.111	0.079	-0.031	1	2.76354e-09	FALSE	0.998858	TRUE	no	no	TRUE	0
uc002alg.2	chr15:63334838..63364111,+	BRCA_ctrl	BRCA_cancer	TPM1	292.964	174.82	-0.65401	7.8756e-18	62.2107	1.37803	-5.49471	8.61399e-271	0.016	0.007	-0.008	1	2.41607e-16	FALSE	0.999878	TRUE	no	yes	TRUE	0
uc002alh.2	chr15:63334838..63364111,+	BRCA_ctrl	BRCA_cancer	TPM1	292.964	174.82	-0.65401	7.8756e-18	0.838381	1.85265	1.14071	5.85221e-14	0.003	0.011	0.008	1	2.41607e-16	FALSE	0.999867	TRUE	no	yes	TRUE	0
uc002ali.2	chr15:63334838..63364111,+	BRCA_ctrl	BRCA_cancer	TPM1	292.964	174.82	-0.65401	7.8756e-18	47.6698	24.5184	-0.959182	8.09535e-16	0.201	0.15	-0.051	1	2.41607e-16	FALSE	0.999831	TRUE	no	yes	TRUE	0
uc002alj.2	chr15:63334838..63364111,+	BRCA_ctrl	BRCA_cancer	TPM1	292.964	174.82	-0.65401	7.8756e-18	33.5567	4.81042	-2.80205	1.04983e-53	0.139	0.03	-0.109	2.41607e-16	2.41607e-16	FALSE	0.99988	TRUE	no	yes	TRUE	0
uc002alk.2	chr15:63334838..63364111,+	BRCA_ctrl	BRCA_cancer	TPM1	292.964	174.82	-0.65401	7.8756e-18	78.0775	96.4121	0.304292	0.0485354	0.308	0.487	0.179	1.46323e-10	2.41607e-16	FALSE	0.999817	TRUE	no	yes	TRUE	0
uc002all.2	chr15:63334838..63364111,+	BRCA_ctrl	BRCA_cancer	TPM1	292.964	174.82	-0.65401	7.8756e-18	14.5694	4.962	-1.55373	2.44833e-14	0.061	0.029	-0.033	1	2.41607e-16	FALSE	0.999879	TRUE	no	yes	TRUE	0
uc002alr.2	chr15:63334838..63364111,+	BRCA_ctrl	BRCA_cancer	TPM1	292.964	174.82	-0.65401	7.8756e-18	5.04506	2.26061	-1.15791	7.02519e-24	0.022	0.013	-0.008	1	2.41607e-16	FALSE	0.999352	TRUE	no	yes	TRUE	0
uc002alt.2	chr15:63334838..63364111,+	BRCA_ctrl	BRCA_cancer	TPM1	292.964	174.82	-0.65401	7.8756e-18	14.7058	26.9636	0.874602	1.74588e-09	0.077	0.199	0.122	1	2.41607e-16	FALSE	0.999285	TRUE	no	yes	TRUE	0
uc010bgp.2	chr15:63334838..63364111,+	BRCA_ctrl	BRCA_cancer	TPM1	292.964	174.82	-0.65401	7.8756e-18	13.8988	5.58239	-1.3158	0.167881	0.059	0.033	-0.026	1	2.41607e-16	FALSE	0.98084	TRUE	no	yes	TRUE	0
uc010uif.1	chr15:63334838..63364111,+	BRCA_ctrl	BRCA_cancer	TPM1	292.964	174.82	-0.65401	7.8756e-18	2.45915	0.835496	-1.55504	1.10077e-35	0.01	0.005	-0.005	1	2.41607e-16	FALSE	0.999302	TRUE	no	yes	TRUE	0
uc010uig.1	chr15:63334838..63364111,+	BRCA_ctrl	BRCA_cancer	TPM1	292.964	174.82	-0.65401	7.8756e-18	17.6792	4.0823	-2.11425	6.38703e-20	0.096	0.029	-0.067	1	2.41607e-16	FALSE	0.999267	TRUE	no	yes	TRUE	0
uc002amv.2	chr15:64388177..64436431,+	BRCA_ctrl	BRCA_cancer	SNX1	32.6894	28.9494	-0.774168	3.61181e-51	25.033	10.8665	-1.20391	6.48857e-107	0.758	0.384	-0.374	4.34457e-17	4.34457e-17	FALSE	0.999999	TRUE	no	yes	TRUE	0
uc010bgv.2	chr15:64388177..64436431,+	BRCA_ctrl	BRCA_cancer	SNX1	32.6894	28.9494	-0.774168	3.61181e-51	3.7135	9.55234	1.363	2.63906e-51	0.12	0.334	0.213	1.71764e-16	4.34457e-17	FALSE	0.993026	TRUE	no	yes	TRUE	0
uc010uio.1	chr15:64388177..64436431,+	BRCA_ctrl	BRCA_cancer	SNX1	32.6894	28.9494	-0.774168	3.61181e-51	3.49317	8.28395	1.24564	3.7965e-14	0.107	0.272	0.165	1.68733e-16	4.34457e-17	FALSE	1	TRUE	no	yes	TRUE	0
uc002asb.2	chr15:69706688..69740759,+	BRCA_ctrl	BRCA_cancer	KIF23	1.42797	9.05529	2.66678	1.23445e-94	0.505195	2.42517	2.26134	3.09809e-44	0.35	0.248	-0.101	2.4441e-07	8.01186e-11	FALSE	1	TRUE	no	yes	TRUE	0
uc002asc.2	chr15:69706688..69740759,+	BRCA_ctrl	BRCA_cancer	KIF23	1.42797	9.05529	2.66678	1.23445e-94	0.283947	2.90444	3.35147	1.20836e-40	0.176	0.316	0.139	8.01186e-11	8.01186e-11	FALSE	1	TRUE	no	yes	TRUE	0
uc010ukc.1	chr15:69706688..69740759,+	BRCA_ctrl	BRCA_cancer	KIF23	1.42797	9.05529	2.66678	1.23445e-94	0.542664	3.48193	2.67905	9.40195e-84	0.411	0.41	-0.001	1	8.01186e-11	FALSE	1	TRUE	no	yes	TRUE	0
uc002atq.2	chr15:72452148..72490136,-	BRCA_ctrl	BRCA_cancer	GRAMD2	6.76186	3.42205	-1.01954	4.20745e-11	3.96446	1.46454	-1.43626	9.39757e-10	0.529	0.336	-0.192	0.000283002	4.38905e-05	FALSE	0.999489	TRUE	no	yes	TRUE	0
uc010ukh.1	chr15:72452148..72490136,-	BRCA_ctrl	BRCA_cancer	GRAMD2	6.76186	3.42205	-1.01954	4.20745e-11	2.38142	1.78753	-0.414129	0.0149948	0.414	0.62	0.206	4.38905e-05	4.38905e-05	FALSE	0.698809	TRUE	no	no	TRUE	0
uc002axg.1	chr15:74466087..74469212,+	BRCA_ctrl	BRCA_cancer	ISLR	81.293	72.5505	-0.207191	0.0568689	41.815	11.7555	-1.83059	7.17097e-59	0.522	0.174	-0.348	2.457e-16	2.457e-16	FALSE	0.999998	TRUE	yes	yes	FALSE	0
uc002axh.1	chr15:74466087..74469212,+	BRCA_ctrl	BRCA_cancer	ISLR	81.293	72.5505	-0.207191	0.0568689	39.478	60.795	0.622877	2.82642e-07	0.478	0.826	0.348	2.457e-16	2.457e-16	FALSE	0.999998	TRUE	yes	yes	FALSE	0
uc002bdb.1	chr15:78396991..78423878,-	BRCA_ctrl	BRCA_cancer	CIB2	4.56303	3.26487	-0.486091	0.000165001	2.9261	1.88583	-0.633337	0.129288	0.557	0.399	-0.158	0.00591294	0.00591294	FALSE	0.998317	TRUE	no	yes	TRUE	0
uc002bdc.1	chr15:78396991..78423878,-	BRCA_ctrl	BRCA_cancer	CIB2	4.56303	3.26487	-0.486091	0.000165001	1.47073	1.24149	-0.244646	0.325962	0.404	0.557	0.152	0.0082029	0.00591294	FALSE	0.993511	TRUE	no	yes	TRUE	0
uc002bjp.2	chr15:83776324..83806110,+	BRCA_ctrl	BRCA_cancer	TM6SF1	5.74708	4.06304	-0.57035	8.96751e-16	3.32297	1.59774	-1.05546	2.458e-09	0.543	0.366	-0.177	0.000130447	0.000130447	FALSE	0.998795	TRUE	no	yes	TRUE	0
uc002bjr.2	chr15:83776324..83806110,+	BRCA_ctrl	BRCA_cancer	TM6SF1	5.74708	4.06304	-0.57035	8.96751e-16	2.1942	2.13258	-0.0412352	0.781507	0.41	0.543	0.133	0.000587663	0.000130447	FALSE	0.794376	TRUE	no	yes	TRUE	0
uc002bks.2	chr15:85174691..85185694,+	BRCA_ctrl	BRCA_cancer	SCAND2	4.7177	3.18842	-0.261636	3.0044e-07	1.24622	0.036617	-5.00553	4.73598e-56	0.218	0.011	-0.207	1.73247e-13	3.05088e-14	FALSE	0.903672	TRUE	no	yes	TRUE	0
uc002bkt.2	chr15:85174691..85185694,+	BRCA_ctrl	BRCA_cancer	SCAND2	4.7177	3.18842	-0.261636	3.0044e-07	3.05738	2.87009	-0.0917424	0.116246	0.694	0.903	0.209	3.05088e-14	3.05088e-14	NA	0.886736	TRUE	NA	NA	TRUE	0
uc002bmg.2	chr15:88419988..88799661,-	BRCA_ctrl	BRCA_cancer	NTRK3	4.08812	1.76611	-1.19594	4.17069e-10	2.07207	0.961595	-1.10707	1.91858e-05	0.491	0.37	-0.121	0.000576703	9.51319e-06	FALSE	1	TRUE	yes	yes	TRUE	0
uc010bni.2	chr15:88419988..88799661,-	BRCA_ctrl	BRCA_cancer	NTRK3	4.08812	1.76611	-1.19594	4.17069e-10	1.12897	0.555033	-1.02332	2.4319e-08	0.3	0.467	0.167	9.51319e-06	9.51319e-06	NA	0.0404805	FALSE	NA	NA	TRUE	0
uc002bnc.2	chr15:89420520..89438770,-	BRCA_ctrl	BRCA_cancer	HAPLN3	11.3281	13.8252	0.148976	0.415358	7.86337	12.0512	0.61586	0.000346734	0.695	0.884	0.189	2.75684e-16	6.66373e-17	FALSE	0.999988	TRUE	yes	yes	TRUE	0
uc002bne.2	chr15:89420520..89438770,-	BRCA_ctrl	BRCA_cancer	HAPLN3	11.3281	13.8252	0.148976	0.415358	2.78717	1.09355	-1.3494	1.12089e-16	0.247	0.078	-0.169	6.66373e-17	6.66373e-17	NA	0.995548	TRUE	NA	NA	TRUE	0
uc002bpv.2	chr15:91427665..91439004,+	BRCA_ctrl	BRCA_cancer	FES	7.44783	4.43513	-0.768579	1.46292e-19	5.41108	2.58393	-1.066	2.53708e-18	0.709	0.572	-0.136	3.2385e-05	3.2385e-05	FALSE	1	TRUE	no	yes	NA	0
uc002dbr.2	chr16:11961987..12010519,-	BRCA_ctrl	BRCA_cancer	GSPT1	25.4616	32.9093	0.406496	4.36449e-13	14.2989	9.51933	-0.586962	0.00747696	0.557	0.308	-0.249	6.06266e-12	6.06266e-12	FALSE	0.999993	TRUE	no	yes	TRUE	0
uc002dbt.2	chr16:11961987..12010519,-	BRCA_ctrl	BRCA_cancer	GSPT1	25.4616	32.9093	0.406496	4.36449e-13	8.26379	17.9106	1.11593	1.84718e-17	0.329	0.529	0.2	2.92559e-11	6.06266e-12	FALSE	1	TRUE	no	yes	TRUE	0
uc002dbu.2	chr16:11961987..12010519,-	BRCA_ctrl	BRCA_cancer	GSPT1	25.4616	32.9093	0.406496	4.36449e-13	2.43881	4.33233	0.828934	3.33149e-05	0.095	0.128	0.032	1	6.06266e-12	FALSE	1	TRUE	no	yes	TRUE	0
uc010bux.2	chr16:11961987..12010519,-	BRCA_ctrl	BRCA_cancer	GSPT1	25.4616	32.9093	0.406496	4.36449e-13	0.460133	1.14704	1.31687	3.31753e-26	0.019	0.036	0.017	1	6.06266e-12	FALSE	0.999992	TRUE	no	yes	TRUE	0
uc010bro.1	chr16:1447179..1464700,-	BRCA_ctrl	BRCA_cancer	UNKL	2.03288	1.50794	-0.315506	0.000764763	1.5629	0.923394	-0.756783	6.04219e-08	0.726	0.551	-0.175	5.04888e-10	5.04888e-10	FALSE	0.999698	TRUE	no	no	NA	NA
uc002dde.2	chr16:15153881..15188158,-	BRCA_ctrl	BRCA_cancer	RRN3	18.9729	23.067	0.261751	2.52885e-06	15.1883	13.7686	-0.141529	0.266045	0.789	0.575	-0.214	6.10964e-09	6.10964e-09	FALSE	1	TRUE	no	yes	TRUE	0
uc010uzp.1	chr16:15153881..15188158,-	BRCA_ctrl	BRCA_cancer	RRN3	18.9729	23.067	0.261751	2.52885e-06	1.37334	4.60202	1.74425	7.08015e-13	0.081	0.228	0.147	1	6.10964e-09	FALSE	0.999995	TRUE	no	yes	TRUE	0
uc010uzq.1	chr16:15153881..15188158,-	BRCA_ctrl	BRCA_cancer	RRN3	18.9729	23.067	0.261751	2.52885e-06	2.25059	4.58036	1.02501	2.89328e-14	0.122	0.193	0.07	1	6.10964e-09	FALSE	1	TRUE	no	yes	TRUE	0
uc002ddw.2	chr16:15796994..15950887,-	BRCA_ctrl	BRCA_cancer	MYH11	110.752	10.9284	-3.34771	1.82041e-155	25.1453	1.7442	-3.84941	1.27665e-46	0.2	0.084	-0.116	1.95365e-08	1.95365e-08	FALSE	1	TRUE	no	yes	NA	0
uc002ddy.2	chr16:15796994..15950887,-	BRCA_ctrl	BRCA_cancer	MYH11	110.752	10.9284	-3.34771	1.82041e-155	83.3325	8.91292	-3.22486	8.82597e-149	0.777	0.854	0.076	1	1.95365e-08	FALSE	1	TRUE	no	yes	NA	0
uc002den.3	chr16:16243423..16317328,-	BRCA_ctrl	BRCA_cancer	ABCC6	5.18962	2.19211	-1.69304	1.86435e-32	2.217	0.498721	-2.15116	3.16023e-32	0.39	0.178	-0.212	6.66096e-15	6.66096e-15	FALSE	1	TRUE	no	yes	TRUE	0
uc002deo.3	chr16:16243423..16317328,-	BRCA_ctrl	BRCA_cancer	ABCC6	5.18962	2.19211	-1.69304	1.86435e-32	2.06511	1.1776	-0.807747	5.22364e-08	0.407	0.558	0.151	7.10554e-12	6.66096e-15	FALSE	0.442131	TRUE	no	no	TRUE	0
uc002cmw.3	chr16:1832933..1839191,+	BRCA_ctrl	BRCA_cancer	NUBP2	20.4473	39.9292	0.995387	2.09916e-34	11.9552	28.7894	1.26786	1.76806e-40	0.561	0.704	0.143	3.72189e-11	3.72189e-11	FALSE	0.999689	TRUE	no	yes	TRUE	0
uc002cmx.3	chr16:1832933..1839191,+	BRCA_ctrl	BRCA_cancer	NUBP2	20.4473	39.9292	0.995387	2.09916e-34	8.37756	10.9109	0.381219	9.04015e-06	0.433	0.29	-0.143	4.61856e-11	3.72189e-11	FALSE	0.958242	TRUE	no	yes	TRUE	0
uc002dhr.2	chr16:20775312..20808478,+	BRCA_ctrl	BRCA_cancer	ACSM3	5.01858	1.28814	-1.98845	1.5361e-57	3.9331	0.977796	-2.00689	4.989e-46	0.813	0.7	-0.113	2.31964e-05	2.31964e-05	FALSE	0.999999	TRUE	no	yes	NA	0
uc002dkp.2	chr16:22430867..22449036,-	BRCA_ctrl	BRCA_cancer	RRN3P3	1.19853	1.03712	-0.219379	3.31972e-05	1.01294	0.742122	-0.447298	1.20001e-05	0.844	0.71	-0.134	0.00101342	0.00101342	NA	0.0717706	FALSE	NA	NA	NA	NA
uc002dlk.2	chr16:23072729..23160591,-	BRCA_ctrl	BRCA_cancer	USP31	5.30408	2.91633	-0.81845	1.82245e-42	1.48327	0.376058	-1.97913	4.36119e-26	0.271	0.135	-0.136	2.55653e-12	8.99677e-14	FALSE	1	TRUE	no	no	TRUE	0
uc002dll.2	chr16:23072729..23160591,-	BRCA_ctrl	BRCA_cancer	USP31	5.30408	2.91633	-0.81845	1.82245e-42	2.96831	2.09958	-0.499471	9.68914e-09	0.565	0.697	0.131	8.99677e-14	8.99677e-14	FALSE	1	TRUE	no	yes	TRUE	0
uc002cgb.1	chr16:238970..279449,-	BRCA_ctrl	BRCA_cancer	LUC7L	16.0911	22.6694	0.372102	3.93089e-08	1.15516	1.05823	-0.127441	0.274174	0.072	0.046	-0.026	1	2.65236e-12	FALSE	0.99279	TRUE	no	yes	TRUE	0
uc002cgc.1	chr16:238970..279449,-	BRCA_ctrl	BRCA_cancer	LUC7L	16.0911	22.6694	0.372102	3.93089e-08	6.47401	12.3921	0.936404	1.11903e-25	0.395	0.541	0.147	6.35165e-11	2.65236e-12	FALSE	0.999669	TRUE	no	yes	TRUE	0
uc002cgd.1	chr16:238970..279449,-	BRCA_ctrl	BRCA_cancer	LUC7L	16.0911	22.6694	0.372102	3.93089e-08	3.68855	2.67461	-0.463804	2.42115e-07	0.237	0.125	-0.111	2.65236e-12	2.65236e-12	NA	0.97331	TRUE	NA	NA	TRUE	0
uc002cge.1	chr16:238970..279449,-	BRCA_ctrl	BRCA_cancer	LUC7L	16.0911	22.6694	0.372102	3.93089e-08	2.4442	3.41135	0.479921	1.9179e-08	0.152	0.152	0	1	2.65236e-12	FALSE	0.998767	TRUE	no	yes	TRUE	0
uc010bqq.1	chr16:238970..279449,-	BRCA_ctrl	BRCA_cancer	LUC7L	16.0911	22.6694	0.372102	3.93089e-08	1.52323	1.67866	0.139657	0.300124	0.095	0.073	-0.023	1	2.65236e-12	FALSE	0.249623	FALSE	no	no	TRUE	0
uc002dru.2	chr16:28962128..28977765,+	BRCA_ctrl	BRCA_cancer	NFATC2IP	11.4584	12.997	0.217002	4.7612e-06	4.54003	7.08765	0.642755	2.26487e-18	0.395	0.542	0.147	7.17277e-10	7.17277e-10	FALSE	0.999985	TRUE	no	yes	TRUE	0
uc002drv.2	chr16:28962128..28977765,+	BRCA_ctrl	BRCA_cancer	NFATC2IP	11.4584	12.997	0.217002	4.7612e-06	3.95499	2.69898	-0.551134	0.00036598	0.347	0.211	-0.136	3.21881e-07	7.17277e-10	FALSE	0.798783	TRUE	no	yes	TRUE	0
uc010vdh.1	chr16:28962128..28977765,+	BRCA_ctrl	BRCA_cancer	NFATC2IP	11.4584	12.997	0.217002	4.7612e-06	2.50625	2.8316	0.175795	0.05914	0.215	0.215	0	1	7.17277e-10	FALSE	0.611257	TRUE	no	yes	TRUE	0
uc002dso.3	chr16:29454226..29466285,-	BRCA_ctrl	BRCA_cancer	BOLA2	16.6149	41.4835	1.13522	1.3795e-50	7.33434	10.943	0.577047	1.69236e-18	0.46	0.309	-0.152	2.60162e-08	2.60162e-08	NA	0.717287	TRUE	NA	NA	TRUE	0
uc002dss.2	chr16:29454226..29466285,-	BRCA_ctrl	BRCA_cancer	BOLA2	16.6149	41.4835	1.13522	1.3795e-50	8.89795	29.3147	1.71985	1.29728e-54	0.517	0.664	0.147	2.60162e-08	2.60162e-08	FALSE	0.92812	TRUE	no	yes	TRUE	0
uc002dsz.2	chr16:29465866..29476300,+	BRCA_ctrl	BRCA_cancer	SULT1A3	20.315	16.4262	-0.0829368	0.345989	2.01116	3.12541	0.635478	0.00836768	0.121	0.213	0.092	1	1.56334e-15	TRUE	0.999873	TRUE	no	yes	TRUE	0
uc002dta.2	chr16:29465866..29476300,+	BRCA_ctrl	BRCA_cancer	SULT1A3	20.315	16.4262	-0.0829368	0.345989	2.09209	4.07361	0.960774	8.25804e-23	0.118	0.259	0.141	1.56334e-15	1.56334e-15	FALSE	0.999864	TRUE	no	yes	TRUE	1
uc002dtb.2	chr16:29465866..29476300,+	BRCA_ctrl	BRCA_cancer	SULT1A3	20.315	16.4262	-0.0829368	0.345989	14.2158	5.89267	-1.27026	2.16701e-16	0.653	0.335	-0.319	4.52911e-13	1.56334e-15	TRUE	0.999874	TRUE	no	yes	TRUE	0
uc002duf.1	chr16:29823409..29827201,+	BRCA_ctrl	BRCA_cancer	PRRT2	1.07995	2.70655	1.36831	4.84853e-21	0.579381	1.83744	1.66373	4.86537e-29	0.559	0.717	0.158	3.03182e-11	3.03182e-11	FALSE	0.999098	TRUE	no	yes	NA	NA
uc002dxw.2	chr16:30389457..30394171,-	BRCA_ctrl	BRCA_cancer	SEPT1	4.47282	6.43844	0.796532	1.60511e-08	2.84635	2.9113	0.0322914	0.866048	0.654	0.532	-0.121	1	0.000194982	NA	0.91063	TRUE	NA	NA	TRUE	0
uc002dxy.2	chr16:30389457..30394171,-	BRCA_ctrl	BRCA_cancer	SEPT1	4.47282	6.43844	0.796532	1.60511e-08	1.09164	2.81816	1.36653	1.66984e-09	0.223	0.359	0.136	0.000194982	0.000194982	FALSE	0.999997	TRUE	no	yes	TRUE	0
uc002dze.1	chr16:30710462..30755599,+	BRCA_ctrl	BRCA_cancer	SRCAP	17.3148	20.6126	0.262394	1.2722e-07	2.08658	1.86793	-0.159619	0.378233	0.113	0.08	-0.032	1	1.24321e-09	FALSE	1	TRUE	no	yes	NA	0
uc002dzf.2	chr16:30710462..30755599,+	BRCA_ctrl	BRCA_cancer	SRCAP	17.3148	20.6126	0.262394	1.2722e-07	10.717	15.4138	0.5243	1.03031e-29	0.631	0.767	0.137	1.24321e-09	1.24321e-09	NA	1	TRUE	NA	NA	NA	0
uc002dzg.1	chr16:30710462..30755599,+	BRCA_ctrl	BRCA_cancer	SRCAP	17.3148	20.6126	0.262394	1.2722e-07	3.49094	2.13964	-0.706138	1.93878e-05	0.196	0.097	-0.099	1	1.24321e-09	FALSE	1	TRUE	no	yes	NA	0
uc010bzz.1	chr16:30710462..30755599,+	BRCA_ctrl	BRCA_cancer	SRCAP	17.3148	20.6126	0.262394	1.2722e-07	1.02026	1.19118	0.223199	0.0505831	0.061	0.055	-0.006	1	1.24321e-09	FALSE	1	TRUE	no	yes	NA	0
uc002dzw.2	chr16:30907928..30914880,+	BRCA_ctrl	BRCA_cancer	CTF1	7.13739	3.64731	-0.968574	1.43987e-17	3.65237	1.47573	-1.30659	0.0215387	0.499	0.234	-0.264	5.7268e-05	5.7268e-05	FALSE	0.996491	TRUE	no	no	FALSE	0
uc002dzx.2	chr16:30907928..30914880,+	BRCA_ctrl	BRCA_cancer	CTF1	7.13739	3.64731	-0.968574	1.43987e-17	3.48502	2.17158	-0.682125	0.00664337	0.501	0.766	0.264	5.7268e-05	5.7268e-05	FALSE	0.996414	TRUE	no	no	FALSE	0
uc002eao.2	chr16:31072172..31085504,-	BRCA_ctrl	BRCA_cancer	ZNF668	3.04195	6.87845	1.16008	6.6504e-67	2.11546	3.61939	0.774877	1.53599e-36	0.726	0.566	-0.16	3.03502e-07	3.03502e-07	FALSE	1	TRUE	no	yes	FALSE	0
uc010caf.2	chr16:31072172..31085504,-	BRCA_ctrl	BRCA_cancer	ZNF668	3.04195	6.87845	1.16008	6.6504e-67	0.566124	2.46406	2.12073	5.8304e-41	0.16	0.318	0.158	1	3.03502e-07	FALSE	1	TRUE	no	yes	FALSE	0
uc002cwv.2	chr16:4560679..4588816,-	BRCA_ctrl	BRCA_cancer	C16orf5	15.2802	9.02384	-0.768844	1.15351e-31	3.7096	1.38721	-1.41866	1.7392e-16	0.24	0.139	-0.101	3.25772e-12	3.25772e-12	FALSE	0.955748	TRUE	no	yes	NA	0
uc002cww.2	chr16:4560679..4588816,-	BRCA_ctrl	BRCA_cancer	C16orf5	15.2802	9.02384	-0.768844	1.15351e-31	9.43134	5.76412	-0.710201	2.38583e-17	0.618	0.64	0.021	1	3.25772e-12	FALSE	0.95583	TRUE	no	yes	NA	0
uc010uxm.1	chr16:4560679..4588816,-	BRCA_ctrl	BRCA_cancer	C16orf5	15.2802	9.02384	-0.768844	1.15351e-31	1.7653	1.40616	-0.328049	0.178031	0.117	0.161	0.044	1	3.25772e-12	FALSE	0.724624	TRUE	no	yes	NA	0
uc002chf.2	chr16:475668..572480,+	BRCA_ctrl	BRCA_cancer	RAB11FIP3	10.3494	17.6221	0.781471	3.43674e-23	3.20434	5.87678	0.875113	4.41717e-20	0.305	0.327	0.023	1	2.92559e-11	FALSE	1	TRUE	no	yes	NA	0
uc010uuf.1	chr16:475668..572480,+	BRCA_ctrl	BRCA_cancer	RAB11FIP3	10.3494	17.6221	0.781471	3.43674e-23	0.117478	2.09653	4.14884	7.71687e-20	0.01	0.095	0.084	1	2.92559e-11	FALSE	1	TRUE	no	yes	NA	0
uc010uug.1	chr16:475668..572480,+	BRCA_ctrl	BRCA_cancer	RAB11FIP3	10.3494	17.6221	0.781471	3.43674e-23	7.0276	9.64877	0.457424	9.01321e-11	0.685	0.578	-0.107	2.92559e-11	2.92559e-11	FALSE	1	TRUE	no	yes	NA	0
uc002egp.1	chr16:50775961..50835846,+	BRCA_ctrl	BRCA_cancer	CYLD	10.2695	9.46076	-0.238574	0.000299499	1.79423	1.92997	0.105206	0.633061	0.168	0.189	0.021	1	2.7133e-14	FALSE	1	TRUE	no	yes	NA	0
uc002egq.1	chr16:50775961..50835846,+	BRCA_ctrl	BRCA_cancer	CYLD	10.2695	9.46076	-0.238574	0.000299499	3.75341	2.16462	-0.79405	8.86392e-05	0.385	0.296	-0.088	1	2.7133e-14	FALSE	1	TRUE	no	yes	NA	0
uc002egr.1	chr16:50775961..50835846,+	BRCA_ctrl	BRCA_cancer	CYLD	10.2695	9.46076	-0.238574	0.000299499	1.9113	1.72638	-0.146765	0.71733	0.189	0.169	-0.02	1	2.7133e-14	FALSE	1	TRUE	no	yes	NA	0
uc010cbs.1	chr16:50775961..50835846,+	BRCA_ctrl	BRCA_cancer	CYLD	10.2695	9.46076	-0.238574	0.000299499	1.61059	2.96007	0.877983	1.15375e-06	0.147	0.276	0.129	2.7133e-14	2.7133e-14	FALSE	1	TRUE	no	yes	NA	0
uc002eks.1	chr16:57126510..57181876,+	BRCA_ctrl	BRCA_cancer	CPNE2	23.0048	12.0569	-0.935724	7.78301e-46	9.21651	2.93034	-1.65279	0.00020792	0.339	0.188	-0.151	0.000764918	0.000184735	FALSE	1	TRUE	no	no	TRUE	0
uc010ccu.1	chr16:57126510..57181876,+	BRCA_ctrl	BRCA_cancer	CPNE2	23.0048	12.0569	-0.935724	7.78301e-46	13.4937	8.9668	-0.589568	5.18979e-06	0.646	0.798	0.152	0.000184735	0.000184735	FALSE	1	TRUE	no	yes	TRUE	0
uc002elz.1	chr16:57653650..57698944,+	BRCA_ctrl	BRCA_cancer	GPR56	34.3552	43.2091	0.30798	0.000532377	0.758354	1.35323	0.833978	5.80255e-06	0.02	0.026	0.006	1	1.36489e-11	FALSE	0.999992	TRUE	yes	yes	NA	0
uc002ema.1	chr16:57653650..57698944,+	BRCA_ctrl	BRCA_cancer	GPR56	34.3552	43.2091	0.30798	0.000532377	5.13835	10.163	0.983764	1.88169e-11	0.142	0.234	0.092	1	1.36489e-11	FALSE	1	TRUE	no	yes	NA	0
uc002emb.2	chr16:57653650..57698944,+	BRCA_ctrl	BRCA_cancer	GPR56	34.3552	43.2091	0.30798	0.000532377	2.21527	2.82976	0.353105	0.403013	0.062	0.074	0.012	1	1.36489e-11	FALSE	1	TRUE	yes	yes	NA	0
uc002emc.2	chr16:57653650..57698944,+	BRCA_ctrl	BRCA_cancer	GPR56	34.3552	43.2091	0.30798	0.000532377	16.1097	25.7292	0.67544	5.99634e-09	0.444	0.569	0.125	1.36489e-11	1.36489e-11	FALSE	1	TRUE	yes	yes	NA	0
uc002emd.2	chr16:57653650..57698944,+	BRCA_ctrl	BRCA_cancer	GPR56	34.3552	43.2091	0.30798	0.000532377	1.54904	0.643888	-1.26577	6.98714e-13	0.048	0.019	-0.029	1	1.36489e-11	FALSE	1	TRUE	yes	yes	NA	0
uc002eme.2	chr16:57653650..57698944,+	BRCA_ctrl	BRCA_cancer	GPR56	34.3552	43.2091	0.30798	0.000532377	3.97265	1.0407	-1.93201	9.4954e-27	0.13	0.036	-0.094	1	1.36489e-11	FALSE	1	TRUE	yes	yes	NA	0
uc010vhs.1	chr16:57653650..57698944,+	BRCA_ctrl	BRCA_cancer	GPR56	34.3552	43.2091	0.30798	0.000532377	3.61745	0.798873	-2.17814	1.44219e-19	0.119	0.026	-0.094	1	1.36489e-11	FALSE	1	TRUE	yes	yes	NA	0
uc002enh.3	chr16:58426298..58440047,+	BRCA_ctrl	BRCA_cancer	GINS3	3.36646	4.40043	0.410686	7.95067e-08	1.53876	2.71771	0.82077	1.38451e-09	0.452	0.586	0.134	1.60221e-09	2.82363e-10	FALSE	0.988111	TRUE	no	yes	TRUE	0
uc002enj.3	chr16:58426298..58440047,+	BRCA_ctrl	BRCA_cancer	GINS3	3.36646	4.40043	0.410686	7.95067e-08	1.66449	1.52132	-0.129561	0.183094	0.493	0.374	-0.119	2.82363e-10	2.82363e-10	FALSE	0.897522	TRUE	no	no	TRUE	0
uc002enk.2	chr16:58497549..58547522,+	BRCA_ctrl	BRCA_cancer	NDRG4	3.93417	2.56447	-0.634818	3.86919e-06	1.6229	0.369392	-2.13313	2.43818e-08	0.272	0.081	-0.191	1.40312e-06	1.40312e-06	FALSE	0.99999	TRUE	no	yes	FALSE	0
uc002enp.2	chr16:58497549..58547522,+	BRCA_ctrl	BRCA_cancer	NDRG4	3.93417	2.56447	-0.634818	3.86919e-06	1.28827	1.41018	0.130206	0.52576	0.439	0.605	0.166	1.33515e-05	1.40312e-06	FALSE	0.999964	TRUE	no	yes	FALSE	0
uc002evp.1	chr16:68262450..68270136,-	BRCA_ctrl	BRCA_cancer	ESRP2	10.7454	17.2466	0.738345	2.71255e-23	5.21926	6.17308	0.241832	0.002117	0.56	0.376	-0.185	6.56373e-10	6.34839e-10	NA	0.89747	TRUE	NA	NA	TRUE	0
uc002evq.1	chr16:68262450..68270136,-	BRCA_ctrl	BRCA_cancer	ESRP2	10.7454	17.2466	0.738345	2.71255e-23	5.34971	10.7206	1.00267	3.17915e-21	0.425	0.604	0.179	6.34839e-10	6.34839e-10	FALSE	1	TRUE	no	yes	TRUE	0
uc002evy.1	chr16:68344945..68391162,+	BRCA_ctrl	BRCA_cancer	PRMT7	11.589	13.3578	0.064192	0.301679	8.5044	7.41008	-0.198317	0.00129868	0.743	0.599	-0.144	8.88315e-08	8.88315e-08	FALSE	1	TRUE	no	yes	NA	0
uc010cfd.1	chr16:68344945..68391162,+	BRCA_ctrl	BRCA_cancer	PRMT7	11.589	13.3578	0.064192	0.301679	0.777982	2.34606	1.58749	1.03473e-30	0.066	0.157	0.091	1	8.88315e-08	FALSE	0.965341	TRUE	no	no	NA	0
uc010vlg.1	chr16:68344945..68391162,+	BRCA_ctrl	BRCA_cancer	PRMT7	11.589	13.3578	0.064192	0.301679	1.43893	2.68429	0.898874	3.04316e-06	0.114	0.172	0.058	1	8.88315e-08	FALSE	1	TRUE	no	no	NA	0
uc002ext.2	chr16:69796274..69975643,+	BRCA_ctrl	BRCA_cancer	WWP2	18.5809	16.327	-0.185753	0.00891442	3.14437	2.00262	-0.65063	6.84935e-28	0.172	0.137	-0.035	1	8.48344e-13	FALSE	0.999582	TRUE	no	yes	TRUE	0
uc002exu.1	chr16:69796274..69975643,+	BRCA_ctrl	BRCA_cancer	WWP2	18.5809	16.327	-0.185753	0.00891442	1.01768	1.03576	0.0254285	1	0.052	0.062	0.01	1	8.48344e-13	FALSE	1	TRUE	no	yes	TRUE	0
uc002exv.1	chr16:69796274..69975643,+	BRCA_ctrl	BRCA_cancer	WWP2	18.5809	16.327	-0.185753	0.00891442	7.35302	5.73204	-0.359226	0.00454593	0.399	0.383	-0.016	1	8.48344e-13	FALSE	1	TRUE	no	yes	TRUE	0
uc002exw.1	chr16:69796274..69975643,+	BRCA_ctrl	BRCA_cancer	WWP2	18.5809	16.327	-0.185753	0.00891442	4.06312	2.58716	-0.651139	0.00351361	0.219	0.085	-0.133	8.48344e-13	8.48344e-13	FALSE	0.999998	TRUE	no	yes	TRUE	0
uc010vln.1	chr16:69796274..69975643,+	BRCA_ctrl	BRCA_cancer	WWP2	18.5809	16.327	-0.185753	0.00891442	2.96769	4.90927	0.725975	2.42169e-10	0.156	0.328	0.172	1	8.48344e-13	FALSE	1	TRUE	no	yes	TRUE	0
uc002faa.3	chr16:71392626..71424339,+	BRCA_ctrl	BRCA_cancer	CALB2	43.4808	9.61781	-2.17771	2.01368e-36	41.735	8.97941	-2.21636	3.00235e-25	0.953	0.781	-0.172	0.00580396	0.00580396	FALSE	0.999674	TRUE	no	yes	TRUE	0
uc002fac.3	chr16:71392626..71424339,+	BRCA_ctrl	BRCA_cancer	CALB2	43.4808	9.61781	-2.17771	2.01368e-36	1.16092	0.303208	-1.93241	3.26965e-11	0.032	0.149	0.117	1	0.00580396	FALSE	0.993393	TRUE	no	yes	TRUE	0
uc002fbr.3	chr16:72088508..72094957,+	BRCA_ctrl	BRCA_cancer	HP	5.56625	2.28704	-1.34426	5.2188e-09	2.50273	0.547399	-2.18969	6.20094e-05	0.157	0.094	-0.063	1	0.00263715	FALSE	0.999988	TRUE	yes	yes	NA	0
uc002fbx.3	chr16:72088508..72094957,+	BRCA_ctrl	BRCA_cancer	HP	5.56625	2.28704	-1.34426	5.2188e-09	1.15625	0.791782	-0.546916	0.0425744	0.449	0.609	0.159	0.00263715	0.00263715	FALSE	0.991861	TRUE	no	yes	NA	0
uc010cgm.2	chr16:72088508..72094957,+	BRCA_ctrl	BRCA_cancer	HP	5.56625	2.28704	-1.34426	5.2188e-09	1.61465	0.643809	-1.32413	0.00136014	0.302	0.206	-0.096	1	0.00263715	FALSE	0.999907	TRUE	yes	yes	NA	0
uc002feb.2	chr16:75477144..75498584,-	BRCA_ctrl	BRCA_cancer	TMEM170A	7.00837	5.29888	-0.578896	9.76942e-27	3.09188	1.6483	-0.907244	7.05625e-28	0.448	0.319	-0.13	4.82222e-12	4.65237e-12	FALSE	0.209883	FALSE	no	yes	TRUE	1
uc002fec.2	chr16:75477144..75498584,-	BRCA_ctrl	BRCA_cancer	TMEM170A	7.00837	5.29888	-0.578896	9.76942e-27	2.38334	1.41346	-0.753462	1.45633e-05	0.334	0.257	-0.077	1	4.65237e-12	FALSE	0.285053	FALSE	no	yes	TRUE	1
uc002fee.1	chr16:75477144..75498584,-	BRCA_ctrl	BRCA_cancer	TMEM170A	7.00837	5.29888	-0.578896	9.76942e-27	0.986752	1.3819	0.485809	0.000177439	0.134	0.243	0.109	4.65237e-12	4.65237e-12	FALSE	0.673756	TRUE	no	yes	TRUE	0
uc002fgp.2	chr16:81478775..81745365,+	BRCA_ctrl	BRCA_cancer	CMIP	15.7351	14.118	-0.156251	0.00857379	7.85226	6.28452	-0.32124	0.00271136	0.504	0.437	-0.067	1	5.77351e-12	FALSE	1	TRUE	no	yes	TRUE	0
uc002fgq.1	chr16:81478775..81745365,+	BRCA_ctrl	BRCA_cancer	CMIP	15.7351	14.118	-0.156251	0.00857379	2.70312	4.24409	0.650659	0.000942029	0.18	0.304	0.124	5.77351e-12	5.77351e-12	FALSE	1	TRUE	no	yes	TRUE	0
uc010vnq.1	chr16:81478775..81745365,+	BRCA_ctrl	BRCA_cancer	CMIP	15.7351	14.118	-0.156251	0.00857379	4.62361	1.78314	-1.37433	8.97411e-10	0.278	0.129	-0.148	7.80866e-09	5.77351e-12	FALSE	1	TRUE	no	yes	TRUE	0
uc002fgx.2	chr16:82660578..83830197,+	BRCA_ctrl	BRCA_cancer	CDH13	12.3536	4.11386	-1.59543	7.34187e-101	8.94022	2.20049	-2.02215	8.79993e-24	0.698	0.453	-0.244	0.000206928	1.83958e-05	FALSE	1	TRUE	yes	yes	TRUE	0
uc010vnt.1	chr16:82660578..83830197,+	BRCA_ctrl	BRCA_cancer	CDH13	12.3536	4.11386	-1.59543	7.34187e-101	1.73058	1.15694	-0.580748	0.00604556	0.155	0.337	0.182	1.83958e-05	1.83958e-05	FALSE	0.999998	TRUE	no	yes	TRUE	0
uc010vnu.1	chr16:82660578..83830197,+	BRCA_ctrl	BRCA_cancer	CDH13	12.3536	4.11386	-1.59543	7.34187e-101	1.45595	0.729173	-0.997118	0.000170513	0.133	0.203	0.071	1	1.83958e-05	FALSE	1	TRUE	yes	yes	TRUE	0
uc002cke.3	chr16:838622..848072,+	BRCA_ctrl	BRCA_cancer	CHTF18	1.66995	6.03661	1.82412	3.79594e-54	1.11939	4.54202	2.01956	3.65052e-59	0.649	0.755	0.107	3.88379e-09	3.88379e-09	FALSE	1	TRUE	no	yes	NA	NA
uc010vpk.1	chr16:89724210..89737675,+	BRCA_ctrl	BRCA_cancer	C16orf55	1.77081	3.27068	0.853452	9.88695e-36	0.51154	1.40862	1.4575	9.72698e-37	0.274	0.42	0.146	4.18133e-08	4.18133e-08	FALSE	0.764132	TRUE	no	yes	NA	0
uc002fph.1	chr16:89985259..90002505,+	BRCA_ctrl	BRCA_cancer	TUBB3	3.90224	33.4979	3.15755	1.72412e-56	2.26912	30.3396	3.74007	7.49069e-55	0.436	0.842	0.407	8.0208e-17	8.0208e-17	FALSE	1	TRUE	no	yes	TRUE	0
uc010cjb.1	chr16:89985259..90002505,+	BRCA_ctrl	BRCA_cancer	TUBB3	3.90224	33.4979	3.15755	1.72412e-56	1.41629	1.59655	0.172442	0.795927	0.508	0.096	-0.412	3.49815e-16	8.0208e-17	FALSE	0.999991	TRUE	no	yes	TRUE	0
uc002fpl.2	chr16:90015151..90034467,+	BRCA_ctrl	BRCA_cancer	DEF8	14.9792	14.9274	-0.282756	1.20428e-06	1.38426	2.31398	0.741025	0.00106071	0.087	0.149	0.062	1	1.41746e-07	FALSE	0.997189	TRUE	no	no	NA	0
uc002fpm.2	chr16:90015151..90034467,+	BRCA_ctrl	BRCA_cancer	DEF8	14.9792	14.9274	-0.282756	1.20428e-06	3.80611	5.1761	0.443077	0.00237686	0.245	0.314	0.068	1	1.41746e-07	FALSE	0.997206	TRUE	no	no	NA	0
uc002fpo.1	chr16:90015151..90034467,+	BRCA_ctrl	BRCA_cancer	DEF8	14.9792	14.9274	-0.282756	1.20428e-06	4.17522	2.46581	-0.759582	3.47992e-07	0.282	0.181	-0.101	1.41746e-07	1.41746e-07	FALSE	0.999999	TRUE	no	yes	NA	0
uc002fpq.1	chr16:90015151..90034467,+	BRCA_ctrl	BRCA_cancer	DEF8	14.9792	14.9274	-0.282756	1.20428e-06	1.62359	1.9936	0.29531	0.0152191	0.111	0.133	0.022	1	1.41746e-07	FALSE	0.98065	TRUE	no	yes	NA	0
uc010vpr.1	chr16:90015151..90034467,+	BRCA_ctrl	BRCA_cancer	DEF8	14.9792	14.9274	-0.282756	1.20428e-06	3.31909	2.37068	-0.485205	4.1976e-06	0.228	0.179	-0.049	1	1.41746e-07	FALSE	0.999999	TRUE	no	yes	NA	0
uc002fqe.1	chr16:90071279..90086328,-	BRCA_ctrl	BRCA_cancer	DBNDD1	6.14434	21.5449	1.81367	4.1284e-52	3.05042	8.18339	1.42327	8.96864e-07	0.585	0.405	-0.18	0.00207381	0.00207381	FALSE	0.767023	TRUE	no	yes	NA	0
uc002fqf.1	chr16:90071279..90086328,-	BRCA_ctrl	BRCA_cancer	DBNDD1	6.14434	21.5449	1.81367	4.1284e-52	1.19733	6.07048	2.34121	2.23525e-15	0.148	0.246	0.099	1	0.00207381	FALSE	0.766436	TRUE	no	yes	NA	0
uc002fqg.1	chr16:90071279..90086328,-	BRCA_ctrl	BRCA_cancer	DBNDD1	6.14434	21.5449	1.81367	4.1284e-52	1.89658	7.29101	1.94243	6.76728e-19	0.268	0.349	0.081	1	0.00207381	NA	0.766719	TRUE	NA	NA	NA	0
uc010vvl.1	chr17:12692829..12894959,+	BRCA_ctrl	BRCA_cancer	RICH2	2.74093	2.31323	-0.249124	0.0314027	1.16712	0.637506	-0.871843	0.000384841	0.423	0.25	-0.174	6.08867e-08	6.08867e-08	FALSE	1	TRUE	no	yes	NA	0
uc010vvn.1	chr17:12692829..12894959,+	BRCA_ctrl	BRCA_cancer	RICH2	2.74093	2.31323	-0.249124	0.0314027	1.27319	1.18691	-0.101368	0.498981	0.462	0.53	0.068	1	6.08867e-08	NA	1	TRUE	NA	NA	NA	0
uc002fsn.2	chr17:1367482..1396001,-	BRCA_ctrl	BRCA_cancer	MYO1C	100.679	53.24	-0.926397	1.52522e-62	69.8189	45.9787	-0.602627	2.39815e-25	0.771	0.874	0.103	2.31261e-06	2.31261e-06	FALSE	1	TRUE	no	yes	NA	0
uc002fso.2	chr17:1367482..1396001,-	BRCA_ctrl	BRCA_cancer	MYO1C	100.679	53.24	-0.926397	1.52522e-62	16.7815	5.00967	-1.74398	6.20175e-05	0.117	0.085	-0.032	1	2.31261e-06	FALSE	1	TRUE	no	yes	NA	0
uc002fsp.2	chr17:1367482..1396001,-	BRCA_ctrl	BRCA_cancer	MYO1C	100.679	53.24	-0.926397	1.52522e-62	14.0243	2.21849	-2.66	2.53929e-87	0.112	0.041	-0.071	1	2.31261e-06	FALSE	1	TRUE	no	yes	NA	0
uc002gpv.2	chr17:16120509..16229572,+	BRCA_ctrl	BRCA_cancer	PIGL	3.01339	2.3232	-0.422161	6.55487e-09	1.914	1.76872	-0.11488	0.167575	0.649	0.77	0.121	1.46267e-14	1.46267e-14	FALSE	0.994897	TRUE	yes	yes	TRUE	0
uc010vwd.1	chr17:16120509..16229572,+	BRCA_ctrl	BRCA_cancer	PIGL	3.01339	2.3232	-0.422161	6.55487e-09	1.09939	0.554483	-0.986416	4.29158e-24	0.351	0.23	-0.121	1.46267e-14	1.46267e-14	FALSE	0.840981	TRUE	yes	yes	TRUE	0
uc002gqa.3	chr17:16342301..16373962,+	BRCA_ctrl	BRCA_cancer	NCRNA00188	474.692	317.293	-0.553839	4.15731e-12	1.2471	3.59961	1.52761	0.000394022	0.002	0.01	0.008	1	1.6825e-15	NA	0.000575368	FALSE	NA	NA	NA	0
uc002gqb.3	chr17:16342301..16373962,+	BRCA_ctrl	BRCA_cancer	NCRNA00188	474.692	317.293	-0.553839	4.15731e-12	325.174	179.361	-0.858335	1.20773e-22	0.68	0.552	-0.128	1.6825e-15	1.6825e-15	NA	0.000576906	FALSE	NA	NA	NA	0
uc002gqc.2	chr17:16342301..16373962,+	BRCA_ctrl	BRCA_cancer	NCRNA00188	474.692	317.293	-0.553839	4.15731e-12	13.1475	8.08399	-0.701548	1.88488e-14	0.028	0.026	-0.002	1	1.6825e-15	TRUE	0.238394	FALSE	no	no	NA	1
uc010cpd.2	chr17:16342301..16373962,+	BRCA_ctrl	BRCA_cancer	NCRNA00188	474.692	317.293	-0.553839	4.15731e-12	5.17227	5.09267	-0.0223502	0.97065	0.011	0.017	0.005	1	1.6825e-15	NA	0.0005746	FALSE	NA	NA	NA	0
uc010vwf.1	chr17:16342301..16373962,+	BRCA_ctrl	BRCA_cancer	NCRNA00188	474.692	317.293	-0.553839	4.15731e-12	4.17719	3.52734	-0.24339	0.0775823	0.009	0.011	0.002	1	1.6825e-15	NA	0.0309475	FALSE	NA	NA	NA	0
uc010vwg.1	chr17:16342301..16373962,+	BRCA_ctrl	BRCA_cancer	NCRNA00188	474.692	317.293	-0.553839	4.15731e-12	43.2045	55.9394	0.372669	0.00027482	0.095	0.188	0.093	1	1.6825e-15	NA	0.000570777	FALSE	NA	NA	NA	0
uc010vwh.1	chr17:16342301..16373962,+	BRCA_ctrl	BRCA_cancer	NCRNA00188	474.692	317.293	-0.553839	4.15731e-12	35.0943	29.4405	-0.253422	0.0166917	0.074	0.095	0.02	1	1.6825e-15	NA	0.000572616	FALSE	NA	NA	NA	0
uc010vwi.1	chr17:16342301..16373962,+	BRCA_ctrl	BRCA_cancer	NCRNA00188	474.692	317.293	-0.553839	4.15731e-12	39.1803	22.2061	-0.819162	3.69545e-17	0.083	0.068	-0.014	1	1.6825e-15	NA	0.000578905	FALSE	NA	NA	NA	0
uc010vwj.1	chr17:16342301..16373962,+	BRCA_ctrl	BRCA_cancer	NCRNA00188	474.692	317.293	-0.553839	4.15731e-12	5.39826	7.61493	0.496129	0.0117265	0.012	0.025	0.014	1	1.6825e-15	NA	0.000572755	FALSE	NA	NA	NA	0
uc010vwk.1	chr17:16342301..16373962,+	BRCA_ctrl	BRCA_cancer	NCRNA00188	474.692	317.293	-0.553839	4.15731e-12	0.968991	1.68484	0.796029	0.00432049	0.002	0.005	0.003	1	1.6825e-15	NA	0.000577361	FALSE	NA	NA	NA	0
uc002ftk.1	chr17:1646130..1658559,+	BRCA_ctrl	BRCA_cancer	SERPINF2	3.66881	2.28583	-0.698845	3.36387e-07	2.0182	0.967063	-1.06092	5.08436e-06	0.588	0.313	-0.275	1.08721e-09	1.08721e-09	FALSE	1	TRUE	yes	yes	TRUE	0
uc010vqr.1	chr17:1646130..1658559,+	BRCA_ctrl	BRCA_cancer	SERPINF2	3.66881	2.28583	-0.698845	3.36387e-07	1.6506	1.31877	-0.324279	0.0662997	0.412	0.687	0.275	1.08721e-09	1.08721e-09	FALSE	0.999997	TRUE	yes	yes	TRUE	0
uc002gqu.1	chr17:16946107..17088873,+	BRCA_ctrl	BRCA_cancer	MPRIP	51.7967	30.8472	-0.775699	4.55842e-59	21.5052	10.5897	-1.02194	7.12123e-33	0.409	0.345	-0.064	1	6.65605e-14	FALSE	1	TRUE	no	yes	FALSE	0
uc002gqv.1	chr17:16946107..17088873,+	BRCA_ctrl	BRCA_cancer	MPRIP	51.7967	30.8472	-0.775699	4.55842e-59	0.457912	1.78514	1.96123	3.00182e-06	0.011	0.057	0.046	1	6.65605e-14	FALSE	1	TRUE	no	yes	FALSE	0
uc002gqy.1	chr17:16946107..17088873,+	BRCA_ctrl	BRCA_cancer	MPRIP	51.7967	30.8472	-0.775699	4.55842e-59	2.55912	1.67983	-0.607024	3.75152e-10	0.05	0.056	0.006	1	6.65605e-14	FALSE	1	TRUE	no	no	FALSE	0
uc010cpl.1	chr17:16946107..17088873,+	BRCA_ctrl	BRCA_cancer	MPRIP	51.7967	30.8472	-0.775699	4.55842e-59	20.0503	5.7474	-1.80246	7.09521e-26	0.366	0.181	-0.184	3.03182e-11	6.65605e-14	FALSE	0.998881	TRUE	no	no	FALSE	0
uc010cpm.1	chr17:16946107..17088873,+	BRCA_ctrl	BRCA_cancer	MPRIP	51.7967	30.8472	-0.775699	4.55842e-59	6.57232	10.5209	0.67819	1.18488e-12	0.152	0.345	0.193	6.65605e-14	6.65605e-14	FALSE	0.999231	TRUE	no	no	FALSE	0
uc002grj.2	chr17:17408879..17494994,-	BRCA_ctrl	BRCA_cancer	PEMT	35.3368	15.9536	-1.09095	1.80166e-55	18.0945	2.08071	-3.119	7.32932e-17	0.312	0.092	-0.22	9.71211e-09	7.70394e-09	FALSE	0.996876	TRUE	no	yes	TRUE	0
uc002grl.2	chr17:17408879..17494994,-	BRCA_ctrl	BRCA_cancer	PEMT	35.3368	15.9536	-1.09095	1.80166e-55	17.0616	13.8278	-0.302979	1.65058e-05	0.684	0.905	0.222	7.70394e-09	7.70394e-09	FALSE	0.998262	TRUE	no	yes	TRUE	0
uc002gsb.2	chr17:17876127..17920187,+	BRCA_ctrl	BRCA_cancer	LRRC48	2.06779	2.40609	0.262803	0.0955369	1.4011	1.9228	0.455796	0.0128287	0.621	0.736	0.115	6.06536e-05	6.06536e-05	FALSE	1	TRUE	no	yes	NA	0
uc002gwj.2	chr17:19641300..19651746,-	BRCA_ctrl	BRCA_cancer	ALDH3A1	2.9265	1.78092	-0.734177	0.0145705	1.50273	1.45401	-0.0475335	1	0.225	0.061	-0.163	0.0003455	0.0003455	FALSE	1	TRUE	no	yes	NA	0
uc002gzv.2	chr17:26205341..26220409,-	BRCA_ctrl	BRCA_cancer	C17orf108	11.5779	6.74667	-0.759969	2.78392e-25	3.86921	3.10077	-0.319367	0.14283	0.369	0.556	0.187	0.0048564	0.000930534	FALSE	0.0367185	FALSE	no	yes	FALSE	0
uc002gzx.2	chr17:26205341..26220409,-	BRCA_ctrl	BRCA_cancer	C17orf108	11.5779	6.74667	-0.759969	2.78392e-25	6.60134	2.63262	-1.32573	0.00585402	0.528	0.291	-0.237	0.000930534	0.000930534	FALSE	0.0365942	FALSE	no	yes	FALSE	0
uc002hav.1	chr17:26655353..26662495,-	BRCA_ctrl	BRCA_cancer	IFT20	17.3303	21.6264	0.365521	1.39033e-10	5.05365	9.05621	0.840768	1.67695e-31	0.293	0.421	0.128	1.23387e-15	1.23387e-15	FALSE	0.892577	TRUE	no	yes	TRUE	0
uc002haw.1	chr17:26655353..26662495,-	BRCA_ctrl	BRCA_cancer	IFT20	17.3303	21.6264	0.365521	1.39033e-10	11.7685	12.0498	0.0335825	0.702267	0.676	0.554	-0.123	2.06393e-15	1.23387e-15	FALSE	0.845738	TRUE	no	yes	TRUE	0
uc002hbh.2	chr17:26800664..26824796,+	BRCA_ctrl	BRCA_cancer	SLC13A2	7.94535	2.19622	-1.86313	5.97408e-18	5.99905	1.53201	-1.9686	5.98229e-10	0.728	0.444	-0.284	0.000236377	0.000236377	FALSE	1	TRUE	no	yes	NA	0
uc010wam.1	chr17:26800664..26824796,+	BRCA_ctrl	BRCA_cancer	SLC13A2	7.94535	2.19622	-1.86313	5.97408e-18	1.03379	0.237639	-2.11684	6.27618e-07	0.115	0.065	-0.049	1	0.000236377	FALSE	1	TRUE	no	yes	NA	0
uc002hbt.2	chr17:26941459..26972173,-	BRCA_ctrl	BRCA_cancer	KIAA0100	51.5598	58.1259	-0.033783	0.746267	20.5025	31.4509	0.617283	1.57285e-13	0.387	0.557	0.171	1.29332e-06	1.29332e-06	FALSE	1	TRUE	no	yes	TRUE	0
uc002hbu.2	chr17:26941459..26972173,-	BRCA_ctrl	BRCA_cancer	KIAA0100	51.5598	58.1259	-0.033783	0.746267	30.6774	26.3243	-0.220769	0.0496505	0.605	0.436	-0.168	1	1.29332e-06	FALSE	1	TRUE	no	yes	TRUE	0
uc002hco.2	chr17:27051368..27053949,-	BRCA_ctrl	BRCA_cancer	TLCD1	2.53842	13.3071	2.4099	9.14015e-72	1.22757	7.87207	2.67777	6.57153e-72	0.462	0.606	0.144	0.000736823	0.000736823	FALSE	0.998019	TRUE	no	yes	TRUE	0
uc010waw.1	chr17:27051368..27053949,-	BRCA_ctrl	BRCA_cancer	TLCD1	2.53842	13.3071	2.4099	9.14015e-72	1.31086	5.43501	2.0482	6.1969e-33	0.538	0.394	-0.144	0.000736823	0.000736823	FALSE	0.979812	TRUE	no	yes	TRUE	0
uc002hds.2	chr17:27400528..27507407,-	BRCA_ctrl	BRCA_cancer	MYO18A	12.6225	10.3711	-0.310144	8.91961e-05	4.18869	4.40807	0.0738733	0.600952	0.281	0.444	0.163	1	6.45505e-17	FALSE	1	TRUE	no	yes	TRUE	0
uc002hdt.1	chr17:27400528..27507407,-	BRCA_ctrl	BRCA_cancer	MYO18A	12.6225	10.3711	-0.310144	8.91961e-05	6.69895	2.14041	-1.64589	5.27599e-54	0.575	0.226	-0.349	6.45505e-17	6.45505e-17	FALSE	1	TRUE	no	yes	TRUE	0
uc002hdu.1	chr17:27400528..27507407,-	BRCA_ctrl	BRCA_cancer	MYO18A	12.6225	10.3711	-0.310144	8.91961e-05	1.62592	3.55693	1.12923	5.03629e-05	0.13	0.299	0.168	1.54615e-10	6.45505e-17	FALSE	1	TRUE	no	yes	TRUE	0
uc002hel.2	chr17:27941774..27948441,-	BRCA_ctrl	BRCA_cancer	CORO6	3.57134	3.21192	-0.157579	0.575033	2.80732	1.32908	-1.07744	2.33954e-05	0.515	0.353	-0.162	0.000101678	0.000101678	FALSE	1	TRUE	no	yes	NA	0
uc002hen.2	chr17:27941774..27948441,-	BRCA_ctrl	BRCA_cancer	CORO6	3.57134	3.21192	-0.157579	0.575033	0.584991	1.72942	1.56379	1.02334e-07	0.443	0.473	0.031	1	0.000101678	FALSE	0.999355	TRUE	no	yes	NA	1
uc002hgw.2	chr17:30469473..30552745,+	BRCA_ctrl	BRCA_cancer	RHOT1	17.4783	14.6297	-0.254059	4.79954e-05	1.25119	1.56694	0.324158	0.00397306	0.075	0.105	0.031	1	2.9039e-16	FALSE	1	TRUE	no	yes	FALSE	0
uc002hgy.2	chr17:30469473..30552745,+	BRCA_ctrl	BRCA_cancer	RHOT1	17.4783	14.6297	-0.254059	4.79954e-05	4.7028	2.3309	-1.01206	2.99585e-36	0.267	0.159	-0.107	2.9039e-16	2.9039e-16	FALSE	1	TRUE	no	yes	FALSE	0
uc002hgz.2	chr17:30469473..30552745,+	BRCA_ctrl	BRCA_cancer	RHOT1	17.4783	14.6297	-0.254059	4.79954e-05	7.84365	5.6583	-0.47102	0.00296109	0.439	0.372	-0.067	1	2.9039e-16	FALSE	1	TRUE	no	yes	FALSE	0
uc010wby.1	chr17:30469473..30552745,+	BRCA_ctrl	BRCA_cancer	RHOT1	17.4783	14.6297	-0.254059	4.79954e-05	1.4583	2.82044	0.951437	1.75546e-19	0.088	0.193	0.105	3.5074e-15	2.9039e-16	FALSE	1	TRUE	no	yes	FALSE	0
uc002hhh.3	chr17:30677157..30707975,+	BRCA_ctrl	BRCA_cancer	ZNF207	54.7125	62.224	0.145277	0.000101528	7.86066	10.8606	0.466367	1.36639e-06	0.146	0.174	0.028	1	2.24098e-16	FALSE	0.999984	TRUE	no	no	FALSE	0
uc002hhi.3	chr17:30677157..30707975,+	BRCA_ctrl	BRCA_cancer	ZNF207	54.7125	62.224	0.145277	0.000101528	15.5764	30.6467	0.976294	2.93879e-59	0.286	0.491	0.205	2.24098e-16	2.24098e-16	FALSE	0.999968	TRUE	no	no	FALSE	0
uc002hhj.3	chr17:30677157..30707975,+	BRCA_ctrl	BRCA_cancer	ZNF207	54.7125	62.224	0.145277	0.000101528	26.7701	16.9584	-0.658573	2.64075e-09	0.486	0.275	-0.211	8.70575e-16	2.24098e-16	FALSE	0.999988	TRUE	no	no	FALSE	0
uc002hhk.1	chr17:30677157..30707975,+	BRCA_ctrl	BRCA_cancer	ZNF207	54.7125	62.224	0.145277	0.000101528	1.07736	0.66323	-0.699518	0.144931	0.019	0.009	-0.01	1	2.24098e-16	FALSE	0.999985	TRUE	no	no	FALSE	0
uc002hhl.1	chr17:30677157..30707975,+	BRCA_ctrl	BRCA_cancer	ZNF207	54.7125	62.224	0.145277	0.000101528	3.35362	3.01514	-0.153522	0.251356	0.062	0.05	-0.012	1	2.24098e-16	NA	0.998648	TRUE	NA	NA	FALSE	0
uc002him.1	chr17:33336131..33448541,-	BRCA_ctrl	BRCA_cancer	RFFL	7.90339	9.20709	0.211679	0.000573231	2.32136	3.7972	0.709681	4.82405e-14	0.296	0.429	0.134	8.22295e-08	8.22295e-08	FALSE	0.999712	TRUE	no	yes	FALSE	0
uc002hin.1	chr17:33336131..33448541,-	BRCA_ctrl	BRCA_cancer	RFFL	7.90339	9.20709	0.211679	0.000573231	4.36389	3.43607	-0.344749	0.0130499	0.548	0.362	-0.186	1.84043e-07	8.22295e-08	FALSE	0.999781	TRUE	no	yes	FALSE	0
uc002hio.1	chr17:33336131..33448541,-	BRCA_ctrl	BRCA_cancer	RFFL	7.90339	9.20709	0.211679	0.000573231	1.11426	1.74041	0.643105	0.172801	0.143	0.177	0.035	1	8.22295e-08	FALSE	0.99978	TRUE	no	yes	FALSE	0
uc002hoa.2	chr17:35874901..35969486,-	BRCA_ctrl	BRCA_cancer	SYNRG	9.75267	7.9532	-0.277216	1.41176e-05	3.83688	1.78227	-1.10608	2.01029e-08	0.376	0.205	-0.171	1.23981e-08	1.23981e-08	FALSE	1	TRUE	no	no	NA	0
uc002hob.2	chr17:35874901..35969486,-	BRCA_ctrl	BRCA_cancer	SYNRG	9.75267	7.9532	-0.277216	1.41176e-05	1.78685	2.04566	0.195106	0.29881	0.185	0.252	0.067	1	1.23981e-08	FALSE	1	TRUE	no	no	NA	0
uc002hod.2	chr17:35874901..35969486,-	BRCA_ctrl	BRCA_cancer	SYNRG	9.75267	7.9532	-0.277216	1.41176e-05	1.19073	1.03688	-0.199502	0.375628	0.123	0.124	0.002	1	1.23981e-08	FALSE	1	TRUE	no	no	NA	0
uc010wdh.1	chr17:35874901..35969486,-	BRCA_ctrl	BRCA_cancer	SYNRG	9.75267	7.9532	-0.277216	1.41176e-05	1.43675	1.07702	-0.414554	0.00864228	0.138	0.114	-0.024	1	1.23981e-08	FALSE	0.999483	TRUE	no	no	NA	0
uc002hrs.2	chr17:37366790..37381974,-	BRCA_ctrl	BRCA_cancer	STAC2	57.9549	15.3521	-1.92952	1.21428e-16	52.0703	11.6093	-2.16512	4.96438e-14	0.85	0.608	-0.242	0.00175126	0.00175126	FALSE	0.999987	TRUE	no	yes	TRUE	0
uc010cvt.2	chr17:37366790..37381974,-	BRCA_ctrl	BRCA_cancer	STAC2	57.9549	15.3521	-1.92952	1.21428e-16	5.88457	3.74279	-0.652829	0.071748	0.15	0.392	0.242	0.00175126	0.00175126	FALSE	0.998528	TRUE	no	yes	TRUE	0
uc002hsl.2	chr17:37844393..37884914,+	BRCA_ctrl	BRCA_cancer	ERBB2	54.6703	204.765	1.85529	1.2004e-21	0.229858	1.07244	2.21589	1.2894e-20	0.006	0.005	-0.001	1	3.60792e-08	FALSE	1	TRUE	no	yes	TRUE	0
uc002hsm.2	chr17:37844393..37884914,+	BRCA_ctrl	BRCA_cancer	ERBB2	54.6703	204.765	1.85529	1.2004e-21	1.8418	2.0872	0.180416	0.582697	0.057	0.017	-0.04	1	3.60792e-08	FALSE	1	TRUE	no	yes	TRUE	0
uc002hso.2	chr17:37844393..37884914,+	BRCA_ctrl	BRCA_cancer	ERBB2	54.6703	204.765	1.85529	1.2004e-21	38.8091	118.876	1.61497	1.43359e-13	0.692	0.57	-0.123	1	3.60792e-08	FALSE	1	TRUE	yes	yes	TRUE	0
uc002hsp.2	chr17:37844393..37884914,+	BRCA_ctrl	BRCA_cancer	ERBB2	54.6703	204.765	1.85529	1.2004e-21	2.02405	4.10894	1.02127	4.52218e-06	0.038	0.021	-0.017	1	3.60792e-08	FALSE	1	TRUE	no	yes	TRUE	0
uc010cwb.2	chr17:37844393..37884914,+	BRCA_ctrl	BRCA_cancer	ERBB2	54.6703	204.765	1.85529	1.2004e-21	0.735292	2.51675	1.77422	2.72059e-08	0.023	0.013	-0.01	1	3.60792e-08	FALSE	1	TRUE	yes	yes	TRUE	0
uc010wek.1	chr17:37844393..37884914,+	BRCA_ctrl	BRCA_cancer	ERBB2	54.6703	204.765	1.85529	1.2004e-21	10.5947	75.1452	2.82625	9.18972e-30	0.173	0.369	0.196	3.60792e-08	3.60792e-08	FALSE	1	TRUE	yes	yes	TRUE	0
uc002huk.1	chr17:38465446..38513894,+	BRCA_ctrl	BRCA_cancer	RARA	17.5582	38.6753	1.13188	6.69805e-24	2.16053	7.71812	1.8364	8.76529e-22	0.117	0.187	0.07	1	1.78519e-16	FALSE	0.999999	TRUE	no	yes	NA	0
uc002hul.3	chr17:38465446..38513894,+	BRCA_ctrl	BRCA_cancer	RARA	17.5582	38.6753	1.13188	6.69805e-24	10.763	26.0778	1.2767	2.38056e-20	0.62	0.67	0.05	1	1.78519e-16	FALSE	0.999999	TRUE	no	yes	NA	0
uc002hun.1	chr17:38465446..38513894,+	BRCA_ctrl	BRCA_cancer	RARA	17.5582	38.6753	1.13188	6.69805e-24	4.53674	4.19886	-0.111692	0.362987	0.258	0.13	-0.128	1.78519e-16	1.78519e-16	FALSE	0.999999	TRUE	no	yes	NA	0
uc002hzj.1	chr17:40439565..40463958,+	BRCA_ctrl	BRCA_cancer	STAT5A	37.0305	12.9046	-1.53071	6.33074e-102	22.9238	6.0372	-1.92477	5.42025e-41	0.608	0.45	-0.157	2.81318e-08	2.81318e-08	FALSE	1	TRUE	no	yes	FALSE	0
uc010cyb.1	chr17:40439565..40463958,+	BRCA_ctrl	BRCA_cancer	STAT5A	37.0305	12.9046	-1.53071	6.33074e-102	3.56412	1.59012	-1.16414	9.38016e-15	0.101	0.136	0.035	1	2.81318e-08	FALSE	1	TRUE	no	yes	FALSE	0
uc010cyc.1	chr17:40439565..40463958,+	BRCA_ctrl	BRCA_cancer	STAT5A	37.0305	12.9046	-1.53071	6.33074e-102	8.56415	4.52569	-0.920043	1.0546e-23	0.236	0.36	0.124	1	2.81318e-08	FALSE	1	TRUE	no	yes	FALSE	0
uc010cye.1	chr17:40439565..40463958,+	BRCA_ctrl	BRCA_cancer	STAT5A	37.0305	12.9046	-1.53071	6.33074e-102	1.13682	0.399979	-1.49983	3.25904e-31	0.032	0.029	-0.003	1	2.81318e-08	FALSE	0.998801	TRUE	no	yes	FALSE	0
uc002frl.2	chr17:414730..618096,-	BRCA_ctrl	BRCA_cancer	VPS53	7.22514	5.16089	-0.27405	4.19253e-09	1.98092	0.856642	-1.20815	2.26603e-06	0.253	0.135	-0.118	1	7.03018e-08	NA	0.999961	TRUE	NA	NA	TRUE	0
uc010cjo.1	chr17:414730..618096,-	BRCA_ctrl	BRCA_cancer	VPS53	7.22514	5.16089	-0.27405	4.19253e-09	4.33812	3.74509	-0.211976	0.000581576	0.623	0.75	0.127	7.03018e-08	7.03018e-08	FALSE	1	TRUE	no	yes	TRUE	0
uc002ien.1	chr17:41952727..41987068,-	BRCA_ctrl	BRCA_cancer	MPP2	2.20479	2.98417	0.432426	0.0057866	1.48451	2.26224	0.60742	0.000361189	0.662	0.82	0.157	1.29259e-05	1.29259e-05	FALSE	1	TRUE	no	yes	NA	0
uc002iet.2	chr17:42082032..42086435,+	BRCA_ctrl	BRCA_cancer	NAGS	1.25626	2.06195	0.712875	6.75726e-07	0.685292	1.15063	0.744759	2.36878e-09	0.574	0.694	0.12	5.07798e-05	5.07798e-05	FALSE	0.983993	TRUE	no	yes	NA	1
uc002ihe.2	chr17:42785976..42829631,+	BRCA_ctrl	BRCA_cancer	DBF4B	1.78067	2.62196	0.579543	3.12019e-14	0.765912	1.53598	1.00404	2.15859e-31	0.441	0.583	0.142	1.28316e-12	1.28316e-12	FALSE	0.999981	TRUE	no	yes	NA	0
uc002iho.2	chr17:42977154..42982758,+	BRCA_ctrl	BRCA_cancer	CCDC103	3.13358	4.56363	0.425529	0.000128005	1.65457	2.89837	0.807218	1.46815e-11	0.516	0.629	0.113	1.99722e-12	1.99722e-12	FALSE	0.998358	TRUE	no	yes	TRUE	0
uc002ihp.1	chr17:42977154..42982758,+	BRCA_ctrl	BRCA_cancer	CCDC103	3.13358	4.56363	0.425529	0.000128005	1.47902	1.66526	0.170569	0.164487	0.484	0.371	-0.113	1.99722e-12	1.99722e-12	FALSE	0.999988	TRUE	yes	yes	TRUE	0
uc002fxx.2	chr17:4402129..4443228,+	BRCA_ctrl	BRCA_cancer	SPNS2	8.62117	5.28174	-0.786145	9.73953e-13	5.63482	2.82031	-0.998412	5.35891e-16	0.65	0.509	-0.14	3.88379e-09	3.88379e-09	FALSE	1	TRUE	no	yes	TRUE	0
uc002fxy.2	chr17:4402129..4443228,+	BRCA_ctrl	BRCA_cancer	SPNS2	8.62117	5.28174	-0.786145	9.73953e-13	2.98635	2.46144	-0.279339	0.0256868	0.35	0.491	0.14	3.88379e-09	3.88379e-09	FALSE	0.745501	TRUE	no	no	TRUE	0
uc002fxz.3	chr17:4442192..4458681,-	BRCA_ctrl	BRCA_cancer	MYBBP1A	13.5406	15.1232	0.0584514	0.425777	3.30732	2.3529	-0.491107	0.0256869	0.312	0.18	-0.132	0.00015351	0.00015351	FALSE	1	TRUE	no	yes	TRUE	0
uc002fya.3	chr17:4442192..4458681,-	BRCA_ctrl	BRCA_cancer	MYBBP1A	13.5406	15.1232	0.0584514	0.425777	1.39793	1.44057	0.0420096	0.784662	0.1	0.093	-0.007	1	0.00015351	FALSE	0.999536	TRUE	no	no	TRUE	1
uc002fyb.3	chr17:4442192..4458681,-	BRCA_ctrl	BRCA_cancer	MYBBP1A	13.5406	15.1232	0.0584514	0.425777	7.38015	7.72338	0.0655746	0.77987	0.512	0.518	0.007	1	0.00015351	FALSE	1	TRUE	no	yes	TRUE	1
uc010vsa.1	chr17:4442192..4458681,-	BRCA_ctrl	BRCA_cancer	MYBBP1A	13.5406	15.1232	0.0584514	0.425777	1.45519	3.60632	1.30905	4.69878e-10	0.076	0.209	0.132	1	0.00015351	FALSE	0.99997	TRUE	no	no	TRUE	1
uc002ins.1	chr17:46673099..46682354,-	BRCA_ctrl	BRCA_cancer	HOXB6	1.84472	5.32135	1.48953	7.62761e-12	1.09804	4.0865	1.89508	8.98852e-13	0.541	0.677	0.136	4.49046e-05	4.49046e-05	FALSE	0.998374	TRUE	no	yes	NA	0
uc002iqu.2	chr17:48503519..48552200,+	BRCA_ctrl	BRCA_cancer	ACSF2	26.0659	26.1741	-0.148274	0.207836	18.3565	14.7714	-0.313421	0.0152105	0.689	0.581	-0.109	1	1.21697e-07	FALSE	1	TRUE	no	yes	TRUE	0
uc010dbt.1	chr17:48503519..48552200,+	BRCA_ctrl	BRCA_cancer	ACSF2	26.0659	26.1741	-0.148274	0.207836	4.47436	8.30904	0.892177	1.52518e-07	0.177	0.285	0.108	1.21697e-07	1.21697e-07	FALSE	0.955582	TRUE	no	yes	TRUE	0
uc010wml.1	chr17:48503519..48552200,+	BRCA_ctrl	BRCA_cancer	ACSF2	26.0659	26.1741	-0.148274	0.207836	2.00637	1.52378	-0.396937	0.0732652	0.085	0.079	-0.006	1	1.21697e-07	FALSE	1	TRUE	no	yes	TRUE	0
uc010wmo.1	chr17:48503519..48552200,+	BRCA_ctrl	BRCA_cancer	ACSF2	26.0659	26.1741	-0.148274	0.207836	1.20871	1.51846	0.328311	0.321557	0.048	0.051	0.003	1	1.21697e-07	FALSE	0.999999	TRUE	no	yes	TRUE	0
uc002gab.3	chr17:4854386..4860422,+	BRCA_ctrl	BRCA_cancer	ENO3	82.824	2.14683	-5.31923	0	66.6768	0.957342	-6.11999	8.05885e-273	0.513	0.389	-0.123	0.000146983	0.000146983	FALSE	0.999999	TRUE	no	yes	NA	0
uc002gac.3	chr17:4854386..4860422,+	BRCA_ctrl	BRCA_cancer	ENO3	82.824	2.14683	-5.31923	0	15.2668	0.504031	-4.91659	8.21431e-77	0.157	0.215	0.057	1	0.000146983	FALSE	0.999999	TRUE	no	yes	NA	0
uc002isp.1	chr17:48796977..48830070,+	BRCA_ctrl	BRCA_cancer	LUC7L3	47.0407	51.2597	-0.00515191	1	1.97804	1.3371	-0.564125	3.75702e-06	0.04	0.024	-0.016	1	1.02204e-15	FALSE	0.741426	TRUE	no	yes	TRUE	0
uc002isq.2	chr17:48796977..48830070,+	BRCA_ctrl	BRCA_cancer	LUC7L3	47.0407	51.2597	-0.00515191	1	3.73987	3.26846	-0.19428	0.144634	0.078	0.058	-0.02	1	1.02204e-15	FALSE	0.999984	TRUE	no	yes	TRUE	0
uc002isr.2	chr17:48796977..48830070,+	BRCA_ctrl	BRCA_cancer	LUC7L3	47.0407	51.2597	-0.00515191	1	18.189	29.2914	0.687321	3.11288e-44	0.408	0.603	0.194	2.83967e-15	1.02204e-15	FALSE	0.999914	TRUE	no	yes	TRUE	0
uc002iss.2	chr17:48796977..48830070,+	BRCA_ctrl	BRCA_cancer	LUC7L3	47.0407	51.2597	-0.00515191	1	21.8771	15.8645	-0.463613	6.10134e-07	0.449	0.291	-0.158	1.02204e-15	1.02204e-15	FALSE	0.999906	TRUE	no	yes	TRUE	1
uc010wmw.1	chr17:48796977..48830070,+	BRCA_ctrl	BRCA_cancer	LUC7L3	47.0407	51.2597	-0.00515191	1	1.25677	1.49824	0.253193	0.616422	0.025	0.025	0.001	1	1.02204e-15	FALSE	0.999335	TRUE	no	yes	TRUE	0
uc002ita.2	chr17:49039536..49198226,-	BRCA_ctrl	BRCA_cancer	SPAG9	18.5708	13.2428	-0.459111	1.54361e-10	6.98888	2.749	-1.34606	4.72491e-88	0.392	0.264	-0.129	8.48344e-13	8.48344e-13	FALSE	1	TRUE	no	no	TRUE	0
uc002itb.2	chr17:49039536..49198226,-	BRCA_ctrl	BRCA_cancer	SPAG9	18.5708	13.2428	-0.459111	1.54361e-10	5.94674	6.72841	0.178166	0.104943	0.346	0.51	0.163	3.52692e-11	8.48344e-13	FALSE	1	TRUE	no	yes	TRUE	0
uc002itc.2	chr17:49039536..49198226,-	BRCA_ctrl	BRCA_cancer	SPAG9	18.5708	13.2428	-0.459111	1.54361e-10	2.56241	1.94839	-0.395082	0.090692	0.134	0.129	-0.005	1	8.48344e-13	FALSE	1	TRUE	no	yes	TRUE	0
uc002itf.2	chr17:49039536..49198226,-	BRCA_ctrl	BRCA_cancer	SPAG9	18.5708	13.2428	-0.459111	1.54361e-10	2.77429	1.6308	-0.766114	0.0453906	0.12	0.085	-0.035	1	8.48344e-13	FALSE	1	TRUE	no	no	TRUE	0
uc002iug.1	chr17:53342321..53402426,+	BRCA_ctrl	BRCA_cancer	HLF	12.4075	1.57193	-2.97757	1.2864e-137	5.29432	0.714427	-2.88886	1.5531e-76	0.419	0.433	0.014	1	2.62571e-11	FALSE	0.999554	TRUE	no	yes	FALSE	0
uc002iuh.2	chr17:53342321..53402426,+	BRCA_ctrl	BRCA_cancer	HLF	12.4075	1.57193	-2.97757	1.2864e-137	4.187	0.360623	-3.53576	3.97397e-18	0.318	0.113	-0.206	2.62571e-11	2.62571e-11	FALSE	0.992669	TRUE	no	yes	FALSE	0
uc010dce.1	chr17:53342321..53402426,+	BRCA_ctrl	BRCA_cancer	HLF	12.4075	1.57193	-2.97757	1.2864e-137	2.9126	0.476699	-2.61015	8.52812e-43	0.261	0.409	0.148	0.00018608	2.62571e-11	FALSE	0.992695	TRUE	no	yes	FALSE	0
uc002ixc.2	chr17:57187308..57232800,-	BRCA_ctrl	BRCA_cancer	SKA2	8.55827	15.4842	0.882223	4.08704e-22	4.56781	4.99304	0.128414	0.347086	0.552	0.359	-0.193	8.06004e-09	8.06004e-09	NA	0.00148311	FALSE	NA	NA	TRUE	0
uc002ixd.2	chr17:57187308..57232800,-	BRCA_ctrl	BRCA_cancer	SKA2	8.55827	15.4842	0.882223	4.08704e-22	2.19988	6.42052	1.54492	1.80045e-18	0.245	0.384	0.139	3.63872e-08	8.06004e-09	FALSE	0.566333	TRUE	no	no	TRUE	0
uc002ixe.2	chr17:57187308..57232800,-	BRCA_ctrl	BRCA_cancer	SKA2	8.55827	15.4842	0.882223	4.08704e-22	1.23228	3.14597	1.35204	2.78073e-22	0.135	0.193	0.058	1	8.06004e-09	NA	0.00147236	FALSE	NA	NA	TRUE	0
uc002jdo.1	chr17:62006098..62009704,-	BRCA_ctrl	BRCA_cancer	CD79B	4.93329	5.21814	0.0958823	0.655849	3.11189	1.29279	-1.26675	1.67728e-15	0.673	0.403	-0.269	2.95211e-07	2.95211e-07	FALSE	0.99815	TRUE	no	yes	TRUE	0
uc002jdp.1	chr17:62006098..62009704,-	BRCA_ctrl	BRCA_cancer	CD79B	4.93329	5.21814	0.0958823	0.655849	0.845248	1.90879	1.17343	0.0103208	0.138	0.254	0.117	0.00122825	2.95211e-07	FALSE	0.999077	TRUE	yes	yes	TRUE	0
uc002jdq.1	chr17:62006098..62009704,-	BRCA_ctrl	BRCA_cancer	CD79B	4.93329	5.21814	0.0958823	0.655849	0.803903	1.57648	0.969799	0.00972481	0.157	0.268	0.111	1	2.95211e-07	FALSE	0.99905	TRUE	yes	yes	TRUE	0
uc002jfl.2	chr17:63631659..64188212,-	BRCA_ctrl	BRCA_cancer	CCDC46	5.76534	1.49206	-2.01668	1.05716e-148	3.68756	0.58927	-2.64408	1.85533e-49	0.631	0.363	-0.267	2.04686e-06	2.04686e-06	FALSE	1	TRUE	no	yes	FALSE	0
uc002jfm.2	chr17:63631659..64188212,-	BRCA_ctrl	BRCA_cancer	CCDC46	5.76534	1.49206	-2.01668	1.05716e-148	1.16603	0.546026	-1.09368	2.1351e-07	0.206	0.363	0.157	0.000223769	2.04686e-06	FALSE	1	TRUE	no	yes	FALSE	0
uc002jgr.1	chr17:66244145..66253305,+	BRCA_ctrl	BRCA_cancer	AMZ2	41.8677	55.0199	0.431251	4.51931e-10	13.9603	9.80863	-0.509138	0.122205	0.331	0.209	-0.121	0.000192421	0.000192421	FALSE	0.997004	TRUE	no	yes	NA	0
uc002jgs.1	chr17:66244145..66253305,+	BRCA_ctrl	BRCA_cancer	AMZ2	41.8677	55.0199	0.431251	4.51931e-10	5.10688	9.049	0.825132	0.0336139	0.129	0.179	0.05	1	0.000192421	FALSE	0.997005	TRUE	no	yes	NA	0
uc002jgt.1	chr17:66244145..66253305,+	BRCA_ctrl	BRCA_cancer	AMZ2	41.8677	55.0199	0.431251	4.51931e-10	0.626186	1.51378	1.27155	0.138084	0.014	0.018	0.004	1	0.000192421	FALSE	0.997	TRUE	no	yes	NA	0
uc002jgu.1	chr17:66244145..66253305,+	BRCA_ctrl	BRCA_cancer	AMZ2	41.8677	55.0199	0.431251	4.51931e-10	8.28791	15.9369	0.943163	0.0570065	0.191	0.25	0.059	1	0.000192421	FALSE	0.996999	TRUE	no	yes	NA	0
uc002jgv.1	chr17:66244145..66253305,+	BRCA_ctrl	BRCA_cancer	AMZ2	41.8677	55.0199	0.431251	4.51931e-10	11.6518	16.2257	0.477796	6.6016e-06	0.286	0.3	0.014	1	0.000192421	FALSE	0.996897	TRUE	no	yes	NA	1
uc002jgw.1	chr17:66244145..66253305,+	BRCA_ctrl	BRCA_cancer	AMZ2	41.8677	55.0199	0.431251	4.51931e-10	0.330248	1.26939	1.9392	8.37084e-19	0.008	0.023	0.015	1	0.000192421	FALSE	0.982709	TRUE	no	yes	NA	1
uc002jgx.1	chr17:66244145..66253305,+	BRCA_ctrl	BRCA_cancer	AMZ2	41.8677	55.0199	0.431251	4.51931e-10	1.73958	1.05795	-0.714409	0.0467708	0.037	0.017	-0.02	1	0.000192421	FALSE	0.0734115	FALSE	no	no	NA	0
uc002jjn.2	chr17:71279764..71308143,-	BRCA_ctrl	BRCA_cancer	CDC42EP4	46.6611	36.1761	-0.375571	8.88427e-07	3.92692	7.31069	0.896428	5.59828e-05	0.091	0.227	0.136	5.89642e-12	5.89642e-12	FALSE	0.999978	TRUE	no	yes	FALSE	1
uc002jjo.2	chr17:71279764..71308143,-	BRCA_ctrl	BRCA_cancer	CDC42EP4	46.6611	36.1761	-0.375571	8.88427e-07	38.9252	24.4003	-0.673786	0.000244304	0.812	0.634	-0.178	1.77371e-07	5.89642e-12	FALSE	0.999978	TRUE	no	yes	FALSE	1
uc002jjp.1	chr17:71279764..71308143,-	BRCA_ctrl	BRCA_cancer	CDC42EP4	46.6611	36.1761	-0.375571	8.88427e-07	3.80896	4.46505	0.229176	0.579289	0.097	0.139	0.042	1	5.89642e-12	FALSE	0.999778	TRUE	no	yes	FALSE	0
uc002jor.1	chr17:73584139..73622925,+	BRCA_ctrl	BRCA_cancer	MYO15B	10.7694	7.34382	-0.700488	4.50731e-10	3.04297	1.81073	-0.748839	1.98785e-11	0.286	0.262	-0.024	1	3.07835e-16	FALSE	1	TRUE	no	yes	NA	0
uc002jos.3	chr17:73584139..73622925,+	BRCA_ctrl	BRCA_cancer	MYO15B	10.7694	7.34382	-0.700488	4.50731e-10	4.54955	2.27485	-0.999962	9.67773e-19	0.43	0.314	-0.116	3.07835e-16	3.07835e-16	FALSE	1	TRUE	no	yes	NA	1
uc002jph.2	chr17:73717516..73753898,+	BRCA_ctrl	BRCA_cancer	ITGB4	38.6295	26.2438	-0.562648	1.43821e-06	6.7827	4.84611	-0.485011	0.0212135	0.155	0.169	0.013	1	1.47313e-12	FALSE	1	TRUE	yes	yes	FALSE	0
uc002jpi.3	chr17:73717516..73753898,+	BRCA_ctrl	BRCA_cancer	ITGB4	38.6295	26.2438	-0.562648	1.43821e-06	20.4037	18.5795	-0.13513	0.411709	0.473	0.685	0.212	5.15013e-11	1.47313e-12	FALSE	1	TRUE	yes	yes	FALSE	0
uc002jpj.2	chr17:73717516..73753898,+	BRCA_ctrl	BRCA_cancer	ITGB4	38.6295	26.2438	-0.562648	1.43821e-06	10.2807	2.03012	-2.34012	9.91967e-92	0.343	0.119	-0.224	1.47313e-12	1.47313e-12	FALSE	1	TRUE	yes	yes	FALSE	0
uc002jqp.1	chr17:74077087..74099868,-	BRCA_ctrl	BRCA_cancer	EXOC7	33.9341	32.9827	-0.0700588	0.159852	0.955274	3.41919	1.8386	2.39534e-24	0.028	0.097	0.069	1	7.06001e-14	FALSE	0.94154	TRUE	no	no	FALSE	1
uc002jqr.2	chr17:74077087..74099868,-	BRCA_ctrl	BRCA_cancer	EXOC7	33.9341	32.9827	-0.0700588	0.159852	21.7158	13.0562	-0.733992	2.82418e-41	0.637	0.415	-0.223	2.57871e-13	7.06001e-14	FALSE	1	TRUE	no	yes	FALSE	0
uc002jqu.2	chr17:74077087..74099868,-	BRCA_ctrl	BRCA_cancer	EXOC7	33.9341	32.9827	-0.0700588	0.159852	2.10417	1.96945	-0.0954524	0.506717	0.061	0.057	-0.004	1	7.06001e-14	FALSE	0.99985	TRUE	no	no	FALSE	0
uc010wsw.1	chr17:74077087..74099868,-	BRCA_ctrl	BRCA_cancer	EXOC7	33.9341	32.9827	-0.0700588	0.159852	1.97699	1.85963	-0.0880051	0.664409	0.059	0.056	-0.002	1	7.06001e-14	FALSE	1	TRUE	no	yes	FALSE	0
uc010wsx.1	chr17:74077087..74099868,-	BRCA_ctrl	BRCA_cancer	EXOC7	33.9341	32.9827	-0.0700588	0.159852	5.0358	10.5788	1.07073	3.92639e-21	0.151	0.313	0.162	7.06001e-14	7.06001e-14	FALSE	1	TRUE	no	yes	FALSE	0
uc002jqz.2	chr17:74138535..74236390,-	BRCA_ctrl	BRCA_cancer	RNF157	5.8875	1.4666	-2.00843	2.3644e-63	5.10558	0.983393	-2.3756	3.59208e-21	0.763	0.49	-0.273	2.51387e-05	2.51387e-05	FALSE	1	TRUE	no	yes	NA	0
uc002ghy.1	chr17:7491498..7493488,-	BRCA_ctrl	BRCA_cancer	SOX15	1.67082	1.40127	-0.0296487	0.963475	1.26509	0.286475	-2.13656	3.44481e-13	0.709	0.204	-0.504	8.16728e-16	8.16728e-16	FALSE	0.995734	TRUE	no	yes	TRUE	0
uc002ghz.1	chr17:7491498..7493488,-	BRCA_ctrl	BRCA_cancer	SOX15	1.67082	1.40127	-0.0296487	0.963475	0.405735	1.11479	1.45349	3.11295e-10	0.291	0.796	0.504	8.16728e-16	8.16728e-16	FALSE	0.995644	TRUE	no	yes	TRUE	1
uc002jwj.2	chr17:76987799..77005899,-	BRCA_ctrl	BRCA_cancer	CANT1	22.5252	52.6455	1.19241	4.39103e-44	9.53142	13.6376	0.516792	1.19008e-07	0.433	0.272	-0.161	4.58226e-15	4.58226e-15	FALSE	0.999997	TRUE	no	yes	TRUE	2
uc002jwk.2	chr17:76987799..77005899,-	BRCA_ctrl	BRCA_cancer	CANT1	22.5252	52.6455	1.19241	4.39103e-44	11.254	32.342	1.52285	8.51819e-58	0.492	0.604	0.112	6.52665e-14	4.58226e-15	FALSE	0.999997	TRUE	no	yes	TRUE	1
uc002jwl.2	chr17:76987799..77005899,-	BRCA_ctrl	BRCA_cancer	CANT1	22.5252	52.6455	1.19241	4.39103e-44	0.786646	3.52359	2.16048	5.50385e-30	0.035	0.072	0.037	1	4.58226e-15	NA	0.996852	TRUE	NA	NA	TRUE	0
uc002jwn.2	chr17:76987799..77005899,-	BRCA_ctrl	BRCA_cancer	CANT1	22.5252	52.6455	1.19241	4.39103e-44	0.531106	2.44019	2.19776	5.12787e-17	0.02	0.04	0.019	1	4.58226e-15	FALSE	0.999997	TRUE	no	yes	TRUE	1
uc002jyk.2	chr17:78388967..78411881,+	BRCA_ctrl	BRCA_cancer	FLJ35220	5.45686	7.34938	0.262778	0.00303161	0.591363	1.74282	1.55526	6.30003e-19	0.104	0.237	0.134	6.78854e-11	1.15409e-11	FALSE	0.998292	TRUE	no	yes	FALSE	0
uc002jym.1	chr17:78388967..78411881,+	BRCA_ctrl	BRCA_cancer	FLJ35220	5.45686	7.34938	0.262778	0.00303161	3.51367	3.65193	0.055464	0.657453	0.654	0.487	-0.167	1.15409e-11	1.15409e-11	FALSE	0.999586	TRUE	no	yes	FALSE	0
uc002kcw.1	chr17:79935426..79975280,+	BRCA_ctrl	BRCA_cancer	ASPSCR1	6.80135	14.1983	1.07638	1.54956e-37	2.97558	3.11475	0.0660066	0.834108	0.458	0.273	-0.185	0.00599519	0.00599519	FALSE	1	TRUE	no	yes	FALSE	0
uc002kcx.2	chr17:79935426..79975280,+	BRCA_ctrl	BRCA_cancer	ASPSCR1	6.80135	14.1983	1.07638	1.54956e-37	3.24073	9.8652	1.60576	2.28762e-20	0.44	0.633	0.193	0.0077691	0.00599519	FALSE	1	TRUE	no	yes	FALSE	0
uc002gli.2	chr17:8339179..8371480,+	BRCA_ctrl	BRCA_cancer	NDEL1	22.7159	14.4914	-0.667279	1.6819e-60	8.69123	2.92206	-1.57217	8.2803e-71	0.38	0.196	-0.184	1.11066e-16	6.80665e-17	FALSE	0.997934	TRUE	no	yes	FALSE	0
uc002glj.2	chr17:8339179..8371480,+	BRCA_ctrl	BRCA_cancer	NDEL1	22.7159	14.4914	-0.667279	1.6819e-60	12.6754	10.9477	-0.211385	4.04804e-06	0.56	0.761	0.201	6.80665e-17	6.80665e-17	FALSE	0.999412	TRUE	no	yes	FALSE	0
uc002glk.1	chr17:8339179..8371480,+	BRCA_ctrl	BRCA_cancer	NDEL1	22.7159	14.4914	-0.667279	1.6819e-60	1.3493	0.621668	-1.11728	3.15002e-50	0.06	0.043	-0.017	1	6.80665e-17	NA	0.0377043	FALSE	NA	NA	FALSE	0
uc002gmg.1	chr17:9813926..10101868,-	BRCA_ctrl	BRCA_cancer	GAS7	13.3579	5.85029	-1.18963	1.1792e-35	0.865938	1.5038	0.796148	0.0050538	0.062	0.225	0.163	2.35791e-11	2.97666e-15	FALSE	0.999999	TRUE	no	yes	TRUE	0
uc002gmh.1	chr17:9813926..10101868,-	BRCA_ctrl	BRCA_cancer	GAS7	13.3579	5.85029	-1.18963	1.1792e-35	2.17548	0.812132	-1.42118	7.75268e-15	0.171	0.13	-0.041	1	2.97666e-15	FALSE	0.999957	TRUE	no	yes	TRUE	0
uc002gmj.1	chr17:9813926..10101868,-	BRCA_ctrl	BRCA_cancer	GAS7	13.3579	5.85029	-1.18963	1.1792e-35	4.09051	0.592429	-2.78692	1.16813e-27	0.319	0.089	-0.23	2.97666e-15	2.97666e-15	FALSE	0.999995	TRUE	no	yes	TRUE	0
uc010vvc.1	chr17:9813926..10101868,-	BRCA_ctrl	BRCA_cancer	GAS7	13.3579	5.85029	-1.18963	1.1792e-35	1.70932	0.752644	-1.18319	0.000850727	0.149	0.189	0.04	1	2.97666e-15	FALSE	0.999863	TRUE	no	yes	TRUE	0
uc010vvd.1	chr17:9813926..10101868,-	BRCA_ctrl	BRCA_cancer	GAS7	13.3579	5.85029	-1.18963	1.1792e-35	4.49626	2.15964	-1.05779	1.29627e-08	0.297	0.359	0.062	1	2.97666e-15	FALSE	0.999996	TRUE	no	yes	TRUE	0
uc002ktk.2	chr18:19230858..19284766,-	BRCA_ctrl	BRCA_cancer	ABHD3	8.57208	14.2648	0.758322	4.14047e-15	1.77374	1.51582	-0.226994	0.0955719	0.212	0.121	-0.091	1	4.93848e-15	FALSE	0.736152	TRUE	no	no	NA	0
uc002ktl.2	chr18:19230858..19284766,-	BRCA_ctrl	BRCA_cancer	ABHD3	8.57208	14.2648	0.758322	4.14047e-15	5.7865	11.6882	1.01407	1.02119e-20	0.676	0.8	0.125	4.93848e-15	4.93848e-15	FALSE	0.999765	TRUE	no	yes	NA	0
uc002ktw.2	chr18:20513295..20606445,+	BRCA_ctrl	BRCA_cancer	RBBP8	25.413	24.6007	-0.213421	0.0451433	18.9233	13.4263	-0.49509	1.2424e-05	0.76	0.577	-0.184	3.78727e-11	3.78727e-11	FALSE	1	TRUE	no	yes	TRUE	0
uc002kty.2	chr18:20513295..20606445,+	BRCA_ctrl	BRCA_cancer	RBBP8	25.413	24.6007	-0.213421	0.0451433	3.10069	4.09208	0.400053	0.036831	0.108	0.142	0.033	1	3.78727e-11	FALSE	1	TRUE	no	yes	TRUE	0
uc010xap.1	chr18:20513295..20606445,+	BRCA_ctrl	BRCA_cancer	RBBP8	25.413	24.6007	-0.213421	0.0451433	2.57661	6.10845	1.24409	1.11378e-11	0.101	0.24	0.139	1	3.78727e-11	FALSE	0.971105	TRUE	no	yes	TRUE	0
uc002kue.2	chr18:20777720..21017925,-	BRCA_ctrl	BRCA_cancer	C18orf45	7.65071	13.8321	0.795519	3.08687e-30	5.58577	12.4313	1.15371	1.44402e-38	0.672	0.881	0.209	5.94627e-12	5.94627e-12	NA	0.0265547	FALSE	NA	NA	NA	NA
uc002kuq.2	chr18:21269562..21535027,+	BRCA_ctrl	BRCA_cancer	LAMA3	32.7969	8.11077	-1.9405	2.98527e-49	2.60288	1.35626	-0.94033	8.41877e-05	0.099	0.126	0.027	1	1.22183e-09	FALSE	1	TRUE	yes	yes	NA	0
uc002kus.3	chr18:21269562..21535027,+	BRCA_ctrl	BRCA_cancer	LAMA3	32.7969	8.11077	-1.9405	2.98527e-49	28.9598	5.49579	-2.39756	2.28675e-56	0.85	0.635	-0.215	1.22183e-09	1.22183e-09	FALSE	1	TRUE	yes	yes	NA	0
uc002kwi.3	chr18:28570053..28622781,-	BRCA_ctrl	BRCA_cancer	DSC3	8.7157	4.24156	-1.04042	2.11827e-06	4.51273	1.506	-1.58307	6.7072e-05	0.462	0.23	-0.232	3.26825e-06	3.26825e-06	FALSE	1	TRUE	yes	yes	TRUE	0
uc002kwj.3	chr18:28570053..28622781,-	BRCA_ctrl	BRCA_cancer	DSC3	8.7157	4.24156	-1.04042	2.11827e-06	4.20296	2.73556	-0.619536	0.0111104	0.538	0.77	0.232	3.26825e-06	3.26825e-06	FALSE	1	TRUE	yes	yes	TRUE	0
uc002kwp.2	chr18:28898052..28937391,+	BRCA_ctrl	BRCA_cancer	DSG1	1.85321	1.88572	-0.0448251	0.986909	1.55821	1.33376	-0.224311	0.681299	0.759	0.461	-0.298	4.6503e-07	4.6503e-07	FALSE	1	TRUE	yes	yes	NA	0
uc010dmj.2	chr18:32073254..32471808,+	BRCA_ctrl	BRCA_cancer	DTNA	7.10528	4.96241	-0.479001	0.000646546	1.44347	0.391191	-1.88057	6.0031e-29	0.212	0.076	-0.136	8.69196e-14	8.69196e-14	FALSE	1	TRUE	no	yes	NA	0
uc010xby.1	chr18:32073254..32471808,+	BRCA_ctrl	BRCA_cancer	DTNA	7.10528	4.96241	-0.479001	0.000646546	1.34978	0.990166	-0.446864	0.0360387	0.245	0.251	0.006	1	8.69196e-14	FALSE	0.99996	TRUE	no	yes	NA	0
uc002kyp.3	chr18:32870236..32890729,+	BRCA_ctrl	BRCA_cancer	ZNF271	7.66508	6.75939	-0.168927	0.000520291	2.08968	1.00053	-1.06191	8.82023e-47	0.275	0.154	-0.121	5.38163e-15	5.38163e-15	FALSE	0.999594	TRUE	no	yes	NA	0
uc002kyq.3	chr18:32870236..32890729,+	BRCA_ctrl	BRCA_cancer	ZNF271	7.66508	6.75939	-0.168927	0.000520291	4.9122	4.95667	0.0131042	0.900755	0.635	0.723	0.087	1	5.38163e-15	FALSE	0.999588	TRUE	no	yes	NA	0
uc002kzs.1	chr18:33877702..34360018,+	BRCA_ctrl	BRCA_cancer	FHOD3	10.0297	3.84446	-1.467	2.73413e-50	3.3732	0.788289	-2.0967	2.57866e-24	0.325	0.169	-0.156	3.74477e-10	3.74477e-10	FALSE	1	TRUE	no	yes	NA	0
uc010dmz.1	chr18:33877702..34360018,+	BRCA_ctrl	BRCA_cancer	FHOD3	10.0297	3.84446	-1.467	2.73413e-50	1.46959	0.740926	-0.987869	1.91565e-14	0.151	0.199	0.048	1	3.74477e-10	FALSE	1	TRUE	no	yes	NA	0
uc010dnb.1	chr18:33877702..34360018,+	BRCA_ctrl	BRCA_cancer	FHOD3	10.0297	3.84446	-1.467	2.73413e-50	4.69726	1.96508	-1.25706	4.03896e-43	0.47	0.542	0.071	1	3.74477e-10	FALSE	0.999149	TRUE	no	yes	NA	0
uc002kms.1	chr18:5392388..5630642,-	BRCA_ctrl	BRCA_cancer	EPB41L3	20.2501	13.3344	-0.720352	9.7472e-13	7.64885	7.83852	0.0354199	0.841339	0.411	0.578	0.167	4.01409e-09	4.01409e-09	FALSE	0.99973	TRUE	no	yes	TRUE	0
uc002kmu.1	chr18:5392388..5630642,-	BRCA_ctrl	BRCA_cancer	EPB41L3	20.2501	13.3344	-0.720352	9.7472e-13	10.9311	4.27682	-1.3536	1.92657e-31	0.506	0.347	-0.159	9.50375e-09	4.01409e-09	FALSE	1	TRUE	no	yes	TRUE	0
uc002lhc.2	chr18:55711619..56068772,+	BRCA_ctrl	BRCA_cancer	NEDD4L	13.6668	10.4317	-0.42679	6.54916e-07	0.395354	1.80083	2.18666	4.67318e-05	0.027	0.154	0.127	1.4847e-08	1.4847e-08	FALSE	1	TRUE	no	yes	TRUE	0
uc002lhd.2	chr18:55711619..56068772,+	BRCA_ctrl	BRCA_cancer	NEDD4L	13.6668	10.4317	-0.42679	6.54916e-07	0.0802478	1.33439	4.05023	6.59089e-09	0.005	0.097	0.092	1	1.4847e-08	FALSE	1	TRUE	no	yes	TRUE	0
uc002lhe.2	chr18:55711619..56068772,+	BRCA_ctrl	BRCA_cancer	NEDD4L	13.6668	10.4317	-0.42679	6.54916e-07	1.5864	0.62617	-1.34077	4.18e-05	0.132	0.068	-0.064	1	1.4847e-08	FALSE	1	TRUE	no	yes	TRUE	0
uc002lhf.2	chr18:55711619..56068772,+	BRCA_ctrl	BRCA_cancer	NEDD4L	13.6668	10.4317	-0.42679	6.54916e-07	2.24098	0.700179	-1.67796	2.5842e-11	0.157	0.077	-0.08	1	1.4847e-08	FALSE	1	TRUE	no	yes	TRUE	0
uc002lhg.2	chr18:55711619..56068772,+	BRCA_ctrl	BRCA_cancer	NEDD4L	13.6668	10.4317	-0.42679	6.54916e-07	7.49043	3.379	-1.1484	5.88808e-09	0.537	0.346	-0.191	1.18676e-06	1.4847e-08	FALSE	1	TRUE	no	yes	TRUE	0
uc002kmy.3	chr18:5954706..6414910,-	BRCA_ctrl	BRCA_cancer	L3MBTL4	2.91858	1.23082	-1.26531	9.78622e-19	1.22686	0.608322	-1.01156	1.50263e-12	0.44	0.622	0.183	3.16131e-05	3.16131e-05	FALSE	0.999981	TRUE	no	yes	TRUE	0
uc002kmz.3	chr18:5954706..6414910,-	BRCA_ctrl	BRCA_cancer	L3MBTL4	2.91858	1.23082	-1.26531	9.78622e-19	1.18158	0.336093	-1.81187	7.30622e-11	0.399	0.258	-0.141	0.00783772	3.16131e-05	FALSE	1	TRUE	no	yes	TRUE	0
uc002lil.2	chr18:59854524..59974354,+	BRCA_ctrl	BRCA_cancer	KIAA1468	7.8745	7.40609	-0.0804136	0.204777	2.73377	3.4232	0.324235	0.00108894	0.33	0.45	0.12	5.68097e-07	5.68097e-07	FALSE	1	TRUE	no	no	NA	0
uc002lim.2	chr18:59854524..59974354,+	BRCA_ctrl	BRCA_cancer	KIAA1468	7.8745	7.40609	-0.0804136	0.204777	2.9876	2.57528	-0.214365	0.028649	0.389	0.367	-0.021	1	5.68097e-07	FALSE	1	TRUE	no	no	NA	0
uc010xel.1	chr18:59854524..59974354,+	BRCA_ctrl	BRCA_cancer	KIAA1468	7.8745	7.40609	-0.0804136	0.204777	2.0465	1.31233	-0.640776	0.00201523	0.269	0.171	-0.098	1	5.68097e-07	FALSE	1	TRUE	no	no	NA	0
uc002kkt.3	chr18:672544..712662,-	BRCA_ctrl	BRCA_cancer	ENOSF1	13.9246	12.5834	-0.158381	0.0186935	1.18601	1.06417	-0.156682	0.675611	0.083	0.083	0	1	7.18771e-11	TRUE	0.999879	TRUE	no	yes	NA	0
uc002kku.3	chr18:672544..712662,-	BRCA_ctrl	BRCA_cancer	ENOSF1	13.9246	12.5834	-0.158381	0.0186935	1.81366	2.81662	0.634742	0.0695296	0.121	0.206	0.085	1	7.18771e-11	FALSE	0.999994	TRUE	no	yes	NA	0
uc002kkw.3	chr18:672544..712662,-	BRCA_ctrl	BRCA_cancer	ENOSF1	13.9246	12.5834	-0.158381	0.0186935	1.76835	1.80186	0.0265708	0.879778	0.13	0.144	0.014	1	7.18771e-11	FALSE	0.99622	TRUE	no	yes	NA	0
uc010dke.2	chr18:672544..712662,-	BRCA_ctrl	BRCA_cancer	ENOSF1	13.9246	12.5834	-0.158381	0.0186935	5.64741	3.47434	-0.70052	6.06686e-11	0.419	0.293	-0.126	7.18771e-11	7.18771e-11	NA	0.999994	TRUE	NA	NA	NA	0
uc010dkf.2	chr18:672544..712662,-	BRCA_ctrl	BRCA_cancer	ENOSF1	13.9246	12.5834	-0.158381	0.0186935	1.18652	1.09864	-0.110887	0.523055	0.085	0.088	0.003	1	7.18771e-11	FALSE	0.999995	TRUE	no	yes	NA	0
uc010wyt.1	chr18:672544..712662,-	BRCA_ctrl	BRCA_cancer	ENOSF1	13.9246	12.5834	-0.158381	0.0186935	1.41014	0.953096	-0.563874	8.05217e-08	0.097	0.076	-0.021	1	7.18771e-11	NA	0.950328	TRUE	NA	NA	NA	0
uc002kne.2	chr18:6788493..6915710,+	BRCA_ctrl	BRCA_cancer	ARHGAP28	2.57218	1.39304	-0.910628	7.59636e-16	2.288	1.05138	-1.12147	1.66089e-05	0.855	0.613	-0.242	1.97397e-05	1.97397e-05	FALSE	0.999999	TRUE	no	yes	NA	NA
uc002lnk.2	chr18:77662420..77711653,-	BRCA_ctrl	BRCA_cancer	PQLC1	20.4463	15.9818	-0.367346	6.11824e-08	6.95312	6.95998	0.00161805	1	0.342	0.438	0.095	1	5.43094e-14	FALSE	0.999817	TRUE	no	yes	NA	0
uc002lnl.2	chr18:77662420..77711653,-	BRCA_ctrl	BRCA_cancer	PQLC1	20.4463	15.9818	-0.367346	6.11824e-08	11.2682	6.36426	-0.823947	1.96188e-34	0.547	0.406	-0.141	5.43094e-14	5.43094e-14	FALSE	0.999891	TRUE	no	yes	NA	0
uc010xfm.1	chr18:77662420..77711653,-	BRCA_ctrl	BRCA_cancer	PQLC1	20.4463	15.9818	-0.367346	6.11824e-08	2.21759	2.65243	0.258285	0.0172214	0.111	0.156	0.045	1	5.43094e-14	FALSE	0.940918	TRUE	no	yes	NA	0
uc002knv.2	chr18:9136758..9285206,+	BRCA_ctrl	BRCA_cancer	ANKRD12	8.69416	5.87852	-0.554991	3.14273e-16	3.71929	1.43237	-1.37648	5.55499e-11	0.414	0.223	-0.19	5.38021e-07	1.57274e-07	FALSE	1	TRUE	no	yes	FALSE	0
uc002knw.2	chr18:9136758..9285206,+	BRCA_ctrl	BRCA_cancer	ANKRD12	8.69416	5.87852	-0.554991	3.14273e-16	3.96386	3.94832	-0.00568483	0.987342	0.49	0.711	0.221	1.57274e-07	1.57274e-07	FALSE	1	TRUE	no	yes	FALSE	0
uc002mmz.1	chr19:10216965..10221975,+	BRCA_ctrl	BRCA_cancer	PPAN	7.45932	13.3931	0.847914	1.88031e-18	3.90158	8.36762	1.10051	0.000130143	0.425	0.603	0.178	0.0429595	0.0429595	FALSE	1	TRUE	no	yes	TRUE	0
uc002mnb.1	chr19:10216965..10221975,+	BRCA_ctrl	BRCA_cancer	PPAN	7.45932	13.3931	0.847914	1.88031e-18	3.55773	5.02545	0.498	0.0452066	0.575	0.397	-0.178	0.0429595	0.0429595	FALSE	0.999998	TRUE	no	yes	TRUE	0
uc002mpe.3	chr19:10713121..10755234,+	BRCA_ctrl	BRCA_cancer	SLC44A2	78.4353	94.8619	0.19741	0.00132287	39.9878	24.5185	-0.705656	2.23842e-18	0.519	0.276	-0.243	1.48767e-10	1.48767e-10	FALSE	1	TRUE	no	yes	FALSE	0
uc002mpf.2	chr19:10713121..10755234,+	BRCA_ctrl	BRCA_cancer	SLC44A2	78.4353	94.8619	0.19741	0.00132287	27.3132	45.8798	0.748239	1.57916e-09	0.348	0.489	0.141	4.53145e-08	1.48767e-10	FALSE	1	TRUE	no	yes	FALSE	0
uc002mpg.1	chr19:10713121..10755234,+	BRCA_ctrl	BRCA_cancer	SLC44A2	78.4353	94.8619	0.19741	0.00132287	2.02758	2.53832	0.32479	0.00197259	0.025	0.027	0.002	1	1.48767e-10	FALSE	0.999996	TRUE	no	yes	FALSE	1
uc002mph.2	chr19:10713121..10755234,+	BRCA_ctrl	BRCA_cancer	SLC44A2	78.4353	94.8619	0.19741	0.00132287	2.03953	4.34857	1.0916	2.45962e-16	0.026	0.045	0.019	1	1.48767e-10	FALSE	0.999145	TRUE	no	yes	FALSE	0
uc002mpi.2	chr19:10713121..10755234,+	BRCA_ctrl	BRCA_cancer	SLC44A2	78.4353	94.8619	0.19741	0.00132287	7.06717	17.5766	1.31424	1.43797e-10	0.082	0.163	0.081	1	1.48767e-10	FALSE	0.914363	TRUE	no	yes	FALSE	0
uc002mps.1	chr19:10823794..10944160,+	BRCA_ctrl	BRCA_cancer	DNM2	27.4438	34.8526	0.316753	8.50857e-11	1.83791	0.948524	-0.953685	8.16976e-05	0.068	0.028	-0.04	1	5.70636e-05	FALSE	1	TRUE	no	yes	NA	0
uc002mpt.1	chr19:10823794..10944160,+	BRCA_ctrl	BRCA_cancer	DNM2	27.4438	34.8526	0.316753	8.50857e-11	11.9128	19.0575	0.677788	1.61296e-15	0.426	0.541	0.114	5.70636e-05	5.70636e-05	FALSE	1	TRUE	no	yes	NA	0
uc002mpu.1	chr19:10823794..10944160,+	BRCA_ctrl	BRCA_cancer	DNM2	27.4438	34.8526	0.316753	8.50857e-11	4.31892	2.94986	-0.549845	0.0115513	0.161	0.088	-0.072	1	5.70636e-05	FALSE	1	TRUE	no	yes	NA	0
uc002mpw.2	chr19:10823794..10944160,+	BRCA_ctrl	BRCA_cancer	DNM2	27.4438	34.8526	0.316753	8.50857e-11	3.0375	5.17655	0.768951	0.000272565	0.104	0.146	0.043	1	5.70636e-05	FALSE	1	TRUE	no	yes	NA	0
uc002mpx.1	chr19:10823794..10944160,+	BRCA_ctrl	BRCA_cancer	DNM2	27.4438	34.8526	0.316753	8.50857e-11	0.885566	2.10526	1.24831	3.53616e-42	0.033	0.06	0.027	1	5.70636e-05	FALSE	0.983415	TRUE	no	yes	NA	0
uc010dxl.1	chr19:10823794..10944160,+	BRCA_ctrl	BRCA_cancer	DNM2	27.4438	34.8526	0.316753	8.50857e-11	4.18407	4.11244	-0.02488	0.966972	0.159	0.121	-0.038	1	5.70636e-05	FALSE	1	TRUE	no	yes	NA	0
uc002mqb.2	chr19:11033446..11039357,-	BRCA_ctrl	BRCA_cancer	YIPF2	22.3553	38.6366	0.788789	3.13182e-37	15.5635	32.9652	1.08255	2.2485e-49	0.676	0.846	0.17	1.77713e-07	1.77713e-07	FALSE	0.999941	TRUE	no	yes	FALSE	0
uc002mqc.2	chr19:11033446..11039357,-	BRCA_ctrl	BRCA_cancer	YIPF2	22.3553	38.6366	0.788789	3.13182e-37	6.79188	5.6714	-0.25993	0.0650401	0.324	0.154	-0.17	1.77713e-07	1.77713e-07	FALSE	0.999941	TRUE	no	yes	FALSE	0
uc002muz.2	chr19:12873817..12886434,-	BRCA_ctrl	BRCA_cancer	HOOK2	25.3933	17.2988	-0.419205	7.27845e-09	12.208	10.1767	-0.262419	0.00142603	0.495	0.585	0.09	1	5.00824e-12	FALSE	1	TRUE	no	yes	NA	0
uc002mva.2	chr19:12873817..12886434,-	BRCA_ctrl	BRCA_cancer	HOOK2	25.3933	17.2988	-0.419205	7.27845e-09	3.7766	3.05513	-0.305794	0.00044077	0.165	0.182	0.017	1	5.00824e-12	FALSE	0.792875	TRUE	no	yes	NA	0
uc010xmq.1	chr19:12873817..12886434,-	BRCA_ctrl	BRCA_cancer	HOOK2	25.3933	17.2988	-0.419205	7.27845e-09	9.3552	3.98081	-1.23218	1.99333e-46	0.339	0.229	-0.11	5.00824e-12	5.00824e-12	FALSE	0.948739	TRUE	no	yes	NA	0
uc002mxr.2	chr19:14042002..14064204,-	BRCA_ctrl	BRCA_cancer	PODNL1	1.86269	3.12856	0.731676	1.9798e-08	0.736009	1.79522	1.28513	3.64235e-09	0.309	0.501	0.192	1.88557e-07	1.88557e-07	FALSE	1	TRUE	yes	yes	NA	0
uc002nbu.2	chr19:16023180..16045676,-	BRCA_ctrl	BRCA_cancer	CYP4F11	1.43385	2.03089	0.485135	0.0277487	0.964372	1.59046	0.721173	0.0135433	0.548	0.677	0.129	0.0131448	0.0131448	FALSE	1	TRUE	yes	yes	NA	0
uc002nfb.2	chr19:17003763..17137625,-	BRCA_ctrl	BRCA_cancer	CPAMD8	8.01955	3.42978	-1.33491	6.02065e-22	2.63546	0.826521	-1.67243	4.93433e-18	0.309	0.16	-0.149	1.58755e-10	1.58755e-10	FALSE	1	TRUE	no	yes	TRUE	0
uc002nfd.1	chr19:17003763..17137625,-	BRCA_ctrl	BRCA_cancer	CPAMD8	8.01955	3.42978	-1.33491	6.02065e-22	3.97386	1.90902	-1.05749	2.02845e-10	0.483	0.465	-0.018	1	1.58755e-10	FALSE	0.999924	TRUE	no	yes	TRUE	0
uc010xpj.1	chr19:17003763..17137625,-	BRCA_ctrl	BRCA_cancer	CPAMD8	8.01955	3.42978	-1.33491	6.02065e-22	1.41023	0.694236	-1.022	1.96578e-23	0.208	0.375	0.167	3.00997e-09	1.58755e-10	FALSE	0.229764	FALSE	no	no	TRUE	1
uc002nhu.2	chr19:18111944..18124905,+	BRCA_ctrl	BRCA_cancer	ARRDC2	17.0112	12.5454	-0.437941	5.34282e-10	3.07864	3.604	0.227266	0.068803	0.207	0.313	0.106	1.65164e-07	1.65164e-07	FALSE	0.999994	TRUE	no	yes	FALSE	0
uc002nhv.2	chr19:18111944..18124905,+	BRCA_ctrl	BRCA_cancer	ARRDC2	17.0112	12.5454	-0.437941	5.34282e-10	13.9325	8.9414	-0.63985	1.8124e-13	0.793	0.687	-0.106	1.65164e-07	1.65164e-07	FALSE	0.999995	TRUE	no	yes	FALSE	0
uc002niy.2	chr19:18530221..18545371,+	BRCA_ctrl	BRCA_cancer	SSBP4	11.6928	17.8997	0.622575	1.02658e-14	3.2505	7.99217	1.29768	1.9311e-31	0.273	0.439	0.166	4.73076e-15	4.04017e-15	FALSE	0.999964	TRUE	no	yes	TRUE	0
uc002niz.2	chr19:18530221..18545371,+	BRCA_ctrl	BRCA_cancer	SSBP4	11.6928	17.8997	0.622575	1.02658e-14	8.43347	9.86226	0.225628	0.0107732	0.727	0.557	-0.17	4.04017e-15	4.04017e-15	FALSE	0.999927	TRUE	no	yes	TRUE	0
uc002nke.2	chr19:18893584..18902114,-	BRCA_ctrl	BRCA_cancer	COMP	2.52203	56.5058	4.50175	2.07683e-79	0.914319	31.02	5.08338	4.09395e-63	0.217	0.512	0.295	4.53258e-13	4.53258e-13	FALSE	1	TRUE	yes	yes	TRUE	0
uc010xqj.1	chr19:18893584..18902114,-	BRCA_ctrl	BRCA_cancer	COMP	2.52203	56.5058	4.50175	2.07683e-79	1.57081	25.0746	3.99603	8.46073e-60	0.755	0.479	-0.275	7.64354e-12	4.53258e-13	FALSE	1	TRUE	yes	yes	TRUE	0
uc002nkv.2	chr19:19017769..19052041,-	BRCA_ctrl	BRCA_cancer	HOMER3	9.33751	21.4752	1.19871	9.41649e-27	7.18563	19.0307	1.40503	2.81932e-25	0.718	0.855	0.138	1.23565e-07	1.23565e-07	FALSE	0.999986	TRUE	no	yes	NA	0
uc002npf.2	chr19:21106080..21133501,+	BRCA_ctrl	BRCA_cancer	ZNF85	3.41092	4.12094	0.20751	0.00161444	0.764673	1.44763	0.919604	3.1806e-12	0.227	0.339	0.112	7.08291e-13	7.08291e-13	NA	0.00359773	FALSE	NA	NA	NA	0
uc002npg.3	chr19:21106080..21133501,+	BRCA_ctrl	BRCA_cancer	ZNF85	3.41092	4.12094	0.20751	0.00161444	2.00915	2.08389	0.0524812	0.708205	0.584	0.503	-0.081	1	7.08291e-13	FALSE	0.999999	TRUE	no	yes	NA	0
uc002npq.1	chr19:21473963..21512212,-	BRCA_ctrl	BRCA_cancer	ZNF708	3.08854	2.46509	-0.319918	2.04994e-06	0.975142	1.11072	0.187786	0.210986	0.316	0.438	0.123	6.45332e-10	6.45332e-10	FALSE	0.999998	TRUE	no	yes	TRUE	0
uc002npr.1	chr19:21473963..21512212,-	BRCA_ctrl	BRCA_cancer	ZNF708	3.08854	2.46509	-0.319918	2.04994e-06	1.78982	1.12715	-0.667272	3.48553e-12	0.578	0.473	-0.106	8.89037e-09	6.45332e-10	FALSE	0.999988	TRUE	no	yes	TRUE	0
uc002nuw.3	chr19:34287751..34306665,+	BRCA_ctrl	BRCA_cancer	KCTD15	6.13496	9.42387	0.618051	2.9601e-14	2.10449	3.23356	0.619459	0.0167505	0.338	0.358	0.02	1	0.000118474	FALSE	0.982589	TRUE	no	yes	FALSE	0
uc002nux.3	chr19:34287751..34306665,+	BRCA_ctrl	BRCA_cancer	KCTD15	6.13496	9.42387	0.618051	2.9601e-14	2.03631	1.8978	-0.101593	0.728934	0.357	0.213	-0.145	0.000118474	0.000118474	FALSE	0.98256	TRUE	no	yes	FALSE	0
uc002nuy.3	chr19:34287751..34306665,+	BRCA_ctrl	BRCA_cancer	KCTD15	6.13496	9.42387	0.618051	2.9601e-14	1.51972	3.57823	1.23508	2.08502e-07	0.229	0.356	0.128	0.00130913	0.000118474	FALSE	0.982586	TRUE	no	yes	FALSE	0
uc002ogu.2	chr19:38042308..38104994,+	BRCA_ctrl	BRCA_cancer	ZNF540	2.23547	1.25356	-0.881947	1.58359e-26	1.81139	0.779401	-1.21576	7.44404e-18	0.798	0.613	-0.185	0.000147701	0.000147701	FALSE	1	TRUE	no	yes	NA	NA
uc002oln.3	chr19:39936186..39967306,+	BRCA_ctrl	BRCA_cancer	SUPT5H	32.111	40.6895	0.343816	4.14769e-09	4.79537	6.66386	0.474653	0.417044	0.189	0.177	-0.012	1	0.00297664	FALSE	1	TRUE	no	yes	FALSE	0
uc002olo.3	chr19:39936186..39967306,+	BRCA_ctrl	BRCA_cancer	SUPT5H	32.111	40.6895	0.343816	4.14769e-09	17.2574	16.0545	-0.10422	0.68286	0.511	0.401	-0.11	0.00297664	0.00297664	FALSE	1	TRUE	no	yes	FALSE	0
uc002olq.3	chr19:39936186..39967306,+	BRCA_ctrl	BRCA_cancer	SUPT5H	32.111	40.6895	0.343816	4.14769e-09	0.540407	1.38792	1.35984	0.000868032	0.016	0.035	0.019	1	0.00297664	FALSE	1	TRUE	no	yes	FALSE	0
uc002olr.3	chr19:39936186..39967306,+	BRCA_ctrl	BRCA_cancer	SUPT5H	32.111	40.6895	0.343816	4.14769e-09	7.95889	14.8279	0.897564	2.81112e-14	0.231	0.342	0.11	1	0.00297664	FALSE	1	TRUE	no	yes	FALSE	0
uc002opb.3	chr19:41277553..41289745,+	BRCA_ctrl	BRCA_cancer	MIA	28.7586	23.4647	-0.291605	0.330381	28.6685	23.3481	-0.296175	0.385199	0.984	0.853	-0.132	1.81529e-05	1.81529e-05	FALSE	0.850787	TRUE	yes	yes	NA	NA
uc002otr.2	chr19:42905667..42931578,-	BRCA_ctrl	BRCA_cancer	LIPE	118.277	5.30147	-4.58129	0	115.954	4.61383	-4.65129	0	0.935	0.795	-0.14	1.04986e-12	1.04986e-12	FALSE	1	TRUE	no	yes	TRUE	0
uc002ots.1	chr19:42905667..42931578,-	BRCA_ctrl	BRCA_cancer	LIPE	118.277	5.30147	-4.58129	0	2.32274	0.687644	-1.7526	1.61367e-56	0.065	0.205	0.14	1.04986e-12	1.04986e-12	FALSE	0.999886	TRUE	no	yes	TRUE	0
uc002oym.2	chr19:44645710..44664460,+	BRCA_ctrl	BRCA_cancer	ZNF234	2.69469	2.21286	-0.289121	2.97735e-07	2.13168	1.44409	-0.561491	4.76216e-05	0.768	0.623	-0.144	0.0323221	0.0323221	FALSE	1	TRUE	no	yes	NA	NA
uc002pdd.1	chr19:46272976..46285815,-	BRCA_ctrl	BRCA_cancer	DMPK	10.4682	11.3661	0.109442	0.237911	1.46964	1.27416	-0.205817	0.152253	0.164	0.134	-0.03	1	2.65056e-14	FALSE	1	TRUE	no	yes	NA	1
uc002pdf.1	chr19:46272976..46285815,-	BRCA_ctrl	BRCA_cancer	DMPK	10.4682	11.3661	0.109442	0.237911	2.42529	3.21482	0.406835	0.109597	0.173	0.252	0.079	1	2.65056e-14	FALSE	1	TRUE	no	yes	NA	0
uc010xxs.1	chr19:46272976..46285815,-	BRCA_ctrl	BRCA_cancer	DMPK	10.4682	11.3661	0.109442	0.237911	1.45577	2.26577	0.637972	0.00134123	0.149	0.19	0.041	1	2.65056e-14	FALSE	1	TRUE	no	yes	NA	0
uc010xxt.1	chr19:46272976..46285815,-	BRCA_ctrl	BRCA_cancer	DMPK	10.4682	11.3661	0.109442	0.237911	3.62621	1.75783	-1.04419	1.63289e-21	0.371	0.178	-0.193	2.65056e-14	2.65056e-14	FALSE	1	TRUE	no	yes	NA	0
uc002pmi.1	chr19:49588465..49611869,+	BRCA_ctrl	BRCA_cancer	SNRNP70	48.2005	63.5081	0.265162	0.000136836	13.7532	17.5892	0.354789	3.48231e-06	0.285	0.28	-0.005	1	3.23853e-15	FALSE	0.999996	TRUE	no	yes	TRUE	0
uc002pmk.2	chr19:49588465..49611869,+	BRCA_ctrl	BRCA_cancer	SNRNP70	48.2005	63.5081	0.265162	0.000136836	12.0952	28.8475	1.25396	1.07592e-47	0.26	0.465	0.204	3.23853e-15	3.23853e-15	FALSE	0.999997	TRUE	no	yes	TRUE	0
uc002pml.2	chr19:49588465..49611869,+	BRCA_ctrl	BRCA_cancer	SNRNP70	48.2005	63.5081	0.265162	0.000136836	4.75778	3.51268	-0.437821	0.0116673	0.087	0.048	-0.04	1	3.23853e-15	FALSE	0.957486	TRUE	no	no	TRUE	0
uc002pmm.2	chr19:49588465..49611869,+	BRCA_ctrl	BRCA_cancer	SNRNP70	48.2005	63.5081	0.265162	0.000136836	16.7476	12.9762	-0.368092	0.00122274	0.352	0.2	-0.152	3.73191e-14	3.23853e-15	NA	0.95385	TRUE	NA	NA	TRUE	0
uc002ppn.2	chr19:50270180..50310367,+	BRCA_ctrl	BRCA_cancer	AP2A1	28.6195	43.6001	0.395171	9.16997e-15	1.07302	3.96279	1.88433	1.53982e-05	0.041	0.082	0.04	1	3.09739e-08	FALSE	1	TRUE	no	yes	TRUE	0
uc002ppo.2	chr19:50270180..50310367,+	BRCA_ctrl	BRCA_cancer	AP2A1	28.6195	43.6001	0.395171	9.16997e-15	20.8513	22.9776	0.140217	0.0191922	0.737	0.577	-0.16	3.09739e-08	3.09739e-08	FALSE	1	TRUE	no	yes	TRUE	0
uc010enk.2	chr19:50270180..50310367,+	BRCA_ctrl	BRCA_cancer	AP2A1	28.6195	43.6001	0.395171	9.16997e-15	6.2588	16.1168	1.36423	2.28984e-21	0.206	0.329	0.124	1	3.09739e-08	FALSE	0.960726	TRUE	no	yes	TRUE	0
uc002pqg.2	chr19:50364462..50370818,-	BRCA_ctrl	BRCA_cancer	PNKP	8.73724	14.5896	0.746828	8.50617e-27	0.827009	1.36796	0.723581	6.27507e-24	0.101	0.102	0.001	1	6.74449e-07	FALSE	0.999826	TRUE	no	yes	FALSE	1
uc002pqh.2	chr19:50364462..50370818,-	BRCA_ctrl	BRCA_cancer	PNKP	8.73724	14.5896	0.746828	8.50617e-27	6.45117	8.21348	0.348264	4.20449e-05	0.733	0.576	-0.157	6.74449e-07	6.74449e-07	FALSE	1	TRUE	no	yes	FALSE	0
uc002pqj.2	chr19:50364462..50370818,-	BRCA_ctrl	BRCA_cancer	PNKP	8.73724	14.5896	0.746828	8.50617e-27	0.915301	4.1837	2.19103	1.40234e-13	0.097	0.26	0.163	7.61644e-07	6.74449e-07	FALSE	1	TRUE	no	yes	FALSE	0
uc002prq.1	chr19:50706885..50813801,+	BRCA_ctrl	BRCA_cancer	MYH14	23.3285	31.9406	0.312286	0.013821	5.8513	9.69113	0.727877	0.0012341	0.252	0.296	0.044	1	2.51546e-12	FALSE	1	TRUE	no	yes	NA	0
uc002prr.1	chr19:50706885..50813801,+	BRCA_ctrl	BRCA_cancer	MYH14	23.3285	31.9406	0.312286	0.013821	4.06436	1.19427	-1.76665	3.26731e-08	0.165	0.051	-0.114	2.51546e-12	2.51546e-12	FALSE	1	TRUE	no	yes	NA	0
uc010ycb.1	chr19:50706885..50813801,+	BRCA_ctrl	BRCA_cancer	MYH14	23.3285	31.9406	0.312286	0.013821	13.2581	20.8579	0.653704	8.77586e-07	0.575	0.646	0.071	1	2.51546e-12	FALSE	0.999991	TRUE	no	yes	NA	0
uc002puh.2	chr19:51461888..51472929,-	BRCA_ctrl	BRCA_cancer	KLK6	11.0957	13.4884	0.303246	0.408141	3.83262	3.93193	0.0368455	0.976325	0.38	0.299	-0.081	1	0.0012737	FALSE	0.995531	TRUE	yes	yes	NA	0
uc002pui.2	chr19:51461888..51472929,-	BRCA_ctrl	BRCA_cancer	KLK6	11.0957	13.4884	0.303246	0.408141	4.63299	7.38937	0.673337	0.290536	0.367	0.244	-0.123	0.0012737	0.0012737	FALSE	0.995296	TRUE	no	no	NA	0
uc002pup.2	chr19:51479730..51487150,-	BRCA_ctrl	BRCA_cancer	KLK7	12.1633	6.78543	-0.839061	0.00364266	9.55497	5.48911	-0.799564	0.0851913	0.719	0.331	-0.388	1.07767e-07	1.07767e-07	FALSE	0.992225	TRUE	yes	yes	TRUE	0
uc010eok.2	chr19:51479730..51487150,-	BRCA_ctrl	BRCA_cancer	KLK7	12.1633	6.78543	-0.839061	0.00364266	1.9179	0.982753	-0.964026	0.0232683	0.164	0.284	0.12	1	1.07767e-07	FALSE	0.934142	TRUE	no	yes	TRUE	0
uc002pvc.3	chr19:51525487..51531290,-	BRCA_ctrl	BRCA_cancer	KLK11	8.90558	12.7347	0.500024	0.197247	5.10856	9.14057	0.839099	0.0525948	0.571	0.702	0.132	0.00033692	1.12295e-06	FALSE	0.997656	TRUE	yes	yes	TRUE	0
uc002pvd.1	chr19:51525487..51531290,-	BRCA_ctrl	BRCA_cancer	KLK11	8.90558	12.7347	0.500024	0.197247	2.59455	1.7672	-0.553615	0.368944	0.273	0.108	-0.165	1.12295e-06	1.12295e-06	FALSE	0.999114	TRUE	no	yes	TRUE	0
uc002pzu.3	chr19:53115620..53193886,-	BRCA_ctrl	BRCA_cancer	ZNF83	18.2011	15.3548	-0.278953	1.38163e-05	6.23677	4.23238	-0.559325	1.99177e-07	0.324	0.253	-0.071	1	3.37704e-13	FALSE	0.999994	TRUE	no	yes	NA	1
uc010epu.2	chr19:53115620..53193886,-	BRCA_ctrl	BRCA_cancer	ZNF83	18.2011	15.3548	-0.278953	1.38163e-05	1.48522	1.22113	-0.282279	0.231534	0.085	0.078	-0.007	1	3.37704e-13	FALSE	0.999994	TRUE	no	yes	NA	1
uc010epv.2	chr19:53115620..53193886,-	BRCA_ctrl	BRCA_cancer	ZNF83	18.2011	15.3548	-0.278953	1.38163e-05	2.9878	4.30394	0.526458	0.00381067	0.17	0.293	0.123	3.37704e-13	3.37704e-13	FALSE	0.999994	TRUE	no	yes	NA	1
uc010epy.2	chr19:53115620..53193886,-	BRCA_ctrl	BRCA_cancer	ZNF83	18.2011	15.3548	-0.278953	1.38163e-05	2.08788	1.72136	-0.278584	0.427834	0.12	0.113	-0.007	1	3.37704e-13	FALSE	0.999994	TRUE	no	yes	NA	1
uc010epz.2	chr19:53115620..53193886,-	BRCA_ctrl	BRCA_cancer	ZNF83	18.2011	15.3548	-0.278953	1.38163e-05	4.08927	2.49978	-0.70984	6.77189e-14	0.229	0.169	-0.06	1	3.37704e-13	FALSE	0.999985	TRUE	no	yes	NA	0
uc002qcm.2	chr19:54369611..54379682,+	BRCA_ctrl	BRCA_cancer	MYADM	141.308	67.8391	-1.0546	2.31704e-60	121.935	51.6559	-1.2391	1.68742e-55	0.852	0.743	-0.11	7.06001e-14	7.06001e-14	FALSE	0.999944	TRUE	no	yes	NA	0
uc002qcn.2	chr19:54369611..54379682,+	BRCA_ctrl	BRCA_cancer	MYADM	141.308	67.8391	-1.0546	2.31704e-60	11.3002	9.80357	-0.204956	0.260832	0.084	0.153	0.069	1	7.06001e-14	FALSE	0.999944	TRUE	no	yes	NA	0
uc002qcp.2	chr19:54369611..54379682,+	BRCA_ctrl	BRCA_cancer	MYADM	141.308	67.8391	-1.0546	2.31704e-60	7.07048	5.1643	-0.453092	9.69815e-05	0.056	0.084	0.028	1	7.06001e-14	FALSE	0.999944	TRUE	no	yes	NA	0
uc002qfq.2	chr19:54926635..54948052,+	BRCA_ctrl	BRCA_cancer	TTYH1	9.56778	6.61342	-0.530415	0.0472332	5.36651	3.72814	-0.52544	0.221215	0.527	0.384	-0.143	9.52211e-06	9.52211e-06	FALSE	0.999999	TRUE	no	yes	NA	0
uc002qfr.2	chr19:54926635..54948052,+	BRCA_ctrl	BRCA_cancer	TTYH1	9.56778	6.61342	-0.530415	0.0472332	1.29455	0.984141	-0.395262	0.302163	0.171	0.237	0.066	1	9.52211e-06	FALSE	0.999999	TRUE	no	yes	NA	0
uc002qft.2	chr19:54926635..54948052,+	BRCA_ctrl	BRCA_cancer	TTYH1	9.56778	6.61342	-0.530415	0.0472332	2.6681	1.70449	-0.646224	0.131304	0.265	0.202	-0.063	1	9.52211e-06	FALSE	0.999999	TRUE	no	yes	NA	0
uc002qiz.3	chr19:55644162..55660606,-	BRCA_ctrl	BRCA_cancer	TNNT1	79.4024	24.8848	-1.53323	1.74411e-12	0.477637	7.84284	4.03627	1.03665e-18	0.124	0.254	0.129	0.000113977	0.000113977	FALSE	0.998964	TRUE	no	yes	TRUE	0
uc002qja.3	chr19:55644162..55660606,-	BRCA_ctrl	BRCA_cancer	TNNT1	79.4024	24.8848	-1.53323	1.74411e-12	0.76946	14.9491	4.27847	4.14986e-36	0.591	0.645	0.055	1	0.000113977	FALSE	0.998966	TRUE	no	yes	TRUE	0
uc002qjb.3	chr19:55644162..55660606,-	BRCA_ctrl	BRCA_cancer	TNNT1	79.4024	24.8848	-1.53323	1.74411e-12	1.90646	0.516086	-1.87864	7.19057e-13	0.024	0.024	0	1	0.000113977	FALSE	0.999915	TRUE	no	yes	TRUE	0
uc002qjc.3	chr19:55644162..55660606,-	BRCA_ctrl	BRCA_cancer	TNNT1	79.4024	24.8848	-1.53323	1.74411e-12	36.6901	0.458857	-6.31436	1.97092e-15	0.008	0.007	-0.001	1	0.000113977	FALSE	0.999899	TRUE	no	yes	TRUE	0
uc002qje.3	chr19:55644162..55660606,-	BRCA_ctrl	BRCA_cancer	TNNT1	79.4024	24.8848	-1.53323	1.74411e-12	36.1769	0.838711	-5.42694	5.46598e-28	0.163	0.053	-0.11	1	0.000113977	FALSE	0.999864	TRUE	no	yes	TRUE	0
uc002qjf.2	chr19:55644162..55660606,-	BRCA_ctrl	BRCA_cancer	TNNT1	79.4024	24.8848	-1.53323	1.74411e-12	2.67245	0.276049	-3.2569	1.13497e-08	0.09	0.016	-0.073	1	0.000113977	FALSE	0.997274	TRUE	no	yes	TRUE	0
uc002mcj.2	chr19:5681035..5688532,+	BRCA_ctrl	BRCA_cancer	HSD11B1L	3.83649	5.25802	0.582113	5.9565e-09	1.40286	1.07579	-0.383641	0.00120893	0.364	0.217	-0.147	1.88361e-12	1.88361e-12	NA	0.609401	TRUE	NA	NA	NA	0
uc002mcm.2	chr19:5681035..5688532,+	BRCA_ctrl	BRCA_cancer	HSD11B1L	3.83649	5.25802	0.582113	5.9565e-09	0.766451	1.61626	1.07423	1.41128e-05	0.208	0.261	0.054	1	1.88361e-12	FALSE	0.98973	TRUE	no	yes	NA	0
uc002qnd.2	chr19:56951204..56988743,-	BRCA_ctrl	BRCA_cancer	ZNF667	2.63238	1.21352	-1.14184	2.35474e-20	1.68539	0.904618	-0.897242	3.6892e-11	0.638	0.756	0.118	1.79222e-11	1.79222e-11	FALSE	0.999999	TRUE	no	yes	NA	NA
uc002qnw.2	chr19:57321445..57352094,-	BRCA_ctrl	BRCA_cancer	PEG3	5.22562	5.36421	0.0380071	0.953093	4.27237	4.12426	-0.0509083	0.950432	0.755	0.44	-0.314	1.13083e-05	1.13083e-05	FALSE	1	TRUE	no	yes	NA	NA
uc002qpv.3	chr19:58193357..58201167,+	BRCA_ctrl	BRCA_cancer	ZNF551	2.53158	2.03307	-0.309226	0.000710251	1.33354	0.774357	-0.783866	6.98292e-08	0.545	0.415	-0.13	0.000645841	0.000645841	FALSE	1	TRUE	no	yes	TRUE	0
uc002qpw.3	chr19:58193357..58201167,+	BRCA_ctrl	BRCA_cancer	ZNF551	2.53158	2.03307	-0.309226	0.000710251	1.19804	1.25871	0.0711109	0.720746	0.455	0.585	0.13	0.000645841	0.000645841	FALSE	1	TRUE	no	yes	TRUE	0
uc002qqh.1	chr19:58331094..58353487,+	BRCA_ctrl	BRCA_cancer	ZF6	2.02137	2.86553	0.503369	4.53504e-05	1.77352	2.79703	0.656483	6.39199e-07	0.842	0.969	0.127	9.52495e-08	9.52495e-08	FALSE	0.999904	TRUE	no	yes	NA	NA
uc002qri.2	chr19:58595209..58629793,-	BRCA_ctrl	BRCA_cancer	ZSCAN18	21.5654	19.0984	-0.201067	0.0527324	13.5973	10.4556	-0.378999	0.0302715	0.629	0.498	-0.131	0.00346764	0.00346764	FALSE	1	TRUE	no	yes	NA	0
uc002qrj.3	chr19:58595209..58629793,-	BRCA_ctrl	BRCA_cancer	ZSCAN18	21.5654	19.0984	-0.201067	0.0527324	4.2036	4.30712	0.0350706	0.912487	0.196	0.259	0.063	1	0.00346764	FALSE	1	TRUE	no	yes	NA	0
uc002qrk.1	chr19:58595209..58629793,-	BRCA_ctrl	BRCA_cancer	ZSCAN18	21.5654	19.0984	-0.201067	0.0527324	1.13848	0.911031	-0.321636	0.0602446	0.053	0.044	-0.009	1	0.00346764	FALSE	0.91549	TRUE	no	yes	NA	1
uc002lpm.1	chr19:708953..748330,+	BRCA_ctrl	BRCA_cancer	PALM	32.8327	12.2074	-1.4306	1.31245e-47	9.73054	1.6948	-2.52083	4.55952e-30	0.237	0.129	-0.109	8.79685e-10	8.33993e-13	FALSE	0.999996	TRUE	no	yes	TRUE	0
uc002lpn.1	chr19:708953..748330,+	BRCA_ctrl	BRCA_cancer	PALM	32.8327	12.2074	-1.4306	1.31245e-47	1.25238	3.23803	1.36993	6.53088e-10	0.059	0.228	0.169	8.33993e-13	8.33993e-13	FALSE	0.999983	TRUE	no	yes	TRUE	0
uc010xfu.1	chr19:708953..748330,+	BRCA_ctrl	BRCA_cancer	PALM	32.8327	12.2074	-1.4306	1.31245e-47	21.5275	7.12191	-1.59578	1.1018e-64	0.692	0.631	-0.06	1	8.33993e-13	FALSE	0.929138	TRUE	no	yes	TRUE	0
uc002mgd.1	chr19:7112266..7294011,-	BRCA_ctrl	BRCA_cancer	INSR	14.8945	13.054	-0.191358	0.0105112	8.87893	3.19544	-1.47427	4.32767e-25	0.583	0.242	-0.341	1.14511e-16	1.12888e-16	FALSE	1	TRUE	yes	yes	FALSE	0
uc002mge.1	chr19:7112266..7294011,-	BRCA_ctrl	BRCA_cancer	INSR	14.8945	13.054	-0.191358	0.0105112	5.92383	9.7908	0.724883	3.43405e-18	0.411	0.753	0.342	1.12888e-16	1.12888e-16	FALSE	1	TRUE	yes	yes	FALSE	0
uc002mht.2	chr19:7804881..7812464,-	BRCA_ctrl	BRCA_cancer	CD209	6.90121	1.03367	-2.74968	1.49153e-121	1.95025	0.167732	-3.53526	2.16974e-12	0.192	0.067	-0.125	1.35172e-07	1.35172e-07	FALSE	0.999982	TRUE	no	yes	NA	0
uc010dvr.2	chr19:7804881..7812464,-	BRCA_ctrl	BRCA_cancer	CD209	6.90121	1.03367	-2.74968	1.49153e-121	3.829	0.59561	-2.68354	3.25355e-93	0.582	0.608	0.026	1	1.35172e-07	FALSE	0.692774	TRUE	no	yes	NA	0
uc002min.2	chr19:7895161..7929861,+	BRCA_ctrl	BRCA_cancer	EVI5L	3.82134	5.13125	0.434586	9.28736e-12	2.27095	4.44192	0.96764	1.34408e-20	0.601	0.854	0.252	2.49631e-09	2.49631e-09	FALSE	1	TRUE	no	yes	FALSE	0
uc010xjz.1	chr19:7895161..7929861,+	BRCA_ctrl	BRCA_cancer	EVI5L	3.82134	5.13125	0.434586	9.28736e-12	1.49689	0.629868	-1.24826	5.38143e-07	0.384	0.135	-0.249	6.27828e-09	2.49631e-09	FALSE	1	TRUE	no	yes	FALSE	0
uc002lqc.2	chr19:859665..863608,+	BRCA_ctrl	BRCA_cancer	CFD	238.52	27.1348	-3.13625	1.16302e-117	216.324	22.2202	-3.28314	1.10645e-28	0.788	0.531	-0.257	5.65886e-07	5.65886e-07	FALSE	0.999513	TRUE	yes	yes	FALSE	0
uc010drv.2	chr19:859665..863608,+	BRCA_ctrl	BRCA_cancer	CFD	238.52	27.1348	-3.13625	1.16302e-117	22.1953	4.91459	-2.17473	1.02771e-13	0.212	0.469	0.257	5.65886e-07	5.65886e-07	FALSE	0.999588	TRUE	yes	yes	FALSE	0
uc010dwi.2	chr19:8959521..9092018,-	BRCA_ctrl	BRCA_cancer	MUC16	2.31944	4.3366	0.611778	0.0486809	0.56823	1.19286	1.06918	0.027901	0.217	0.235	0.019	1	0.00204826	NA	1	TRUE	NA	NA	NA	0
uc010dwj.2	chr19:8959521..9092018,-	BRCA_ctrl	BRCA_cancer	MUC16	2.31944	4.3366	0.611778	0.0486809	1.32726	2.13195	0.683462	0.107814	0.549	0.39	-0.158	0.00204826	0.00204826	FALSE	1	TRUE	no	yes	NA	0
uc002raf.1	chr2:10183682..10194963,+	BRCA_ctrl	BRCA_cancer	KLF11	17.532	7.01946	-1.32223	7.86421e-108	13.3796	4.23308	-1.66009	3.33177e-21	0.732	0.544	-0.188	0.0474147	0.0474147	FALSE	0.999996	TRUE	no	yes	FALSE	0
uc010yjc.1	chr2:10183682..10194963,+	BRCA_ctrl	BRCA_cancer	KLF11	17.532	7.01946	-1.32223	7.86421e-108	4.15242	2.78637	-0.575484	0.0147791	0.268	0.456	0.188	0.0474147	0.0474147	FALSE	0.99999	TRUE	no	yes	FALSE	0
uc002tcd.3	chr2:103353394..103434136,+	BRCA_ctrl	BRCA_cancer	TMEM182	2.71167	1.47749	-0.92551	8.77603e-36	1.2095	1.28963	0.0923808	0.485373	0.718	0.85	0.132	3.35577e-05	2.03907e-11	FALSE	0.329517	FALSE	no	yes	TRUE	0
uc010fjb.2	chr2:103353394..103434136,+	BRCA_ctrl	BRCA_cancer	TMEM182	2.71167	1.47749	-0.92551	8.77603e-36	1.3856	0.00942322	-7.10886	6.03038e-36	0.21	0.006	-0.204	2.03907e-11	2.03907e-11	FALSE	0.829244	TRUE	no	yes	TRUE	0
uc002ras.2	chr2:10861775..10925228,+	BRCA_ctrl	BRCA_cancer	ATP6V1C2	1.44529	2.31024	0.703066	1.12108e-05	0.217832	1.31848	2.59397	2.29954e-06	0.131	0.256	0.125	0.00500447	0.00500447	FALSE	0.999993	TRUE	no	yes	TRUE	0
uc002rat.2	chr2:10861775..10925228,+	BRCA_ctrl	BRCA_cancer	ATP6V1C2	1.44529	2.31024	0.703066	1.12108e-05	1.22746	0.991756	-0.307561	0.00460158	0.869	0.744	-0.125	0.00500447	0.00500447	FALSE	0.99997	TRUE	no	yes	TRUE	0
uc002tfp.2	chr2:110880916..110962639,-	BRCA_ctrl	BRCA_cancer	NPHP1	3.14349	3.04965	-0.285135	0.000349962	0.555133	1.13882	1.03666	3.56172e-21	0.174	0.375	0.201	9.14117e-16	9.14117e-16	FALSE	0.407604	TRUE	no	no	TRUE	0
uc010ywx.1	chr2:110880916..110962639,-	BRCA_ctrl	BRCA_cancer	NPHP1	3.14349	3.04965	-0.285135	0.000349962	1.3004	0.816355	-0.670988	0.00378205	0.427	0.282	-0.146	0.00011573	9.14117e-16	FALSE	1	TRUE	no	yes	TRUE	0
uc002thk.1	chr2:112656191..112786945,+	BRCA_ctrl	BRCA_cancer	MERTK	5.46159	2.87756	-0.936541	1.33374e-30	5.14188	2.33561	-1.13817	1.53438e-21	0.935	0.753	-0.183	7.29044e-07	7.29044e-07	FALSE	1	TRUE	yes	yes	NA	0
uc002rbc.2	chr2:11295540..11318996,+	BRCA_ctrl	BRCA_cancer	PQLC3	23.2646	20.7653	-0.167504	0.0490307	19.8022	15.4854	-0.354665	4.7996e-05	0.855	0.747	-0.108	9.19863e-13	9.19863e-13	FALSE	0.977523	TRUE	no	yes	FALSE	0
uc010yjk.1	chr2:11295540..11318996,+	BRCA_ctrl	BRCA_cancer	PQLC3	23.2646	20.7653	-0.167504	0.0490307	3.46237	5.27992	0.60854	5.85915e-08	0.145	0.253	0.108	9.19863e-13	9.19863e-13	FALSE	0.971391	TRUE	no	yes	FALSE	0
uc002tmg.2	chr2:120770669..120936694,+	BRCA_ctrl	BRCA_cancer	EPB41L5	9.86586	12.4967	-0.134371	0.114541	1.72394	0.633838	-1.44289	2.76876e-08	0.192	0.047	-0.145	8.03067e-12	6.66096e-15	FALSE	1	TRUE	no	yes	TRUE	0
uc010flk.2	chr2:120770669..120936694,+	BRCA_ctrl	BRCA_cancer	EPB41L5	9.86586	12.4967	-0.134371	0.114541	5.98614	10.3153	0.784762	1.58633e-11	0.56	0.79	0.23	6.66096e-15	6.66096e-15	FALSE	0.999991	TRUE	no	yes	TRUE	0
uc010flm.2	chr2:120770669..120936694,+	BRCA_ctrl	BRCA_cancer	EPB41L5	9.86586	12.4967	-0.134371	0.114541	1.69496	1.44873	-0.226491	0.0347321	0.197	0.153	-0.043	1	6.66096e-15	FALSE	0.999998	TRUE	no	yes	TRUE	0
uc002ttx.2	chr2:135213331..135525334,-	BRCA_ctrl	BRCA_cancer	TMEM163	1.85372	1.29036	-0.538131	7.69813e-05	1.74699	1.00635	-0.795142	3.58035e-05	0.908	0.7	-0.207	0.00183904	0.00183904	FALSE	0.999343	TRUE	no	no	NA	NA
uc002tvm.3	chr2:143886899..144525920,+	BRCA_ctrl	BRCA_cancer	ARHGAP15	3.08649	2.92298	0.0761653	0.583182	1.23464	1.91352	0.631068	0.000135369	0.414	0.606	0.192	2.22163e-10	2.02686e-10	FALSE	0.999982	TRUE	no	yes	TRUE	0
uc002tvn.2	chr2:143886899..144525920,+	BRCA_ctrl	BRCA_cancer	ARHGAP15	3.08649	2.92298	0.0761653	0.583182	1.84408	1.00168	-0.88046	4.15365e-09	0.583	0.391	-0.192	2.02686e-10	2.02686e-10	FALSE	0.984191	TRUE	no	yes	TRUE	0
uc002txl.2	chr2:152266400..152364525,+	BRCA_ctrl	BRCA_cancer	RIF1	8.236	6.22958	-0.414803	7.65086e-06	1.45106	1.85278	0.352409	0.00475938	0.181	0.322	0.142	3.39816e-11	3.39816e-11	FALSE	1	TRUE	no	yes	FALSE	0
uc002txm.2	chr2:152266400..152364525,+	BRCA_ctrl	BRCA_cancer	RIF1	8.236	6.22958	-0.414803	7.65086e-06	5.06435	2.86057	-0.823953	2.20073e-12	0.606	0.439	-0.166	9.99919e-10	3.39816e-11	FALSE	1	TRUE	no	yes	FALSE	0
uc002uaj.3	chr2:160092305..160143236,-	BRCA_ctrl	BRCA_cancer	WDSUB1	7.25042	6.31864	-0.194975	0.000335968	0.984292	1.61664	0.71495	0.00730688	0.136	0.258	0.122	1.7608e-05	3.31834e-07	FALSE	0.999943	TRUE	no	yes	FALSE	0
uc002uak.3	chr2:160092305..160143236,-	BRCA_ctrl	BRCA_cancer	WDSUB1	7.25042	6.31864	-0.194975	0.000335968	0.670434	1.02164	0.606446	0.00212317	0.091	0.152	0.06	1	3.31834e-07	FALSE	0.999943	TRUE	no	yes	FALSE	1
uc002ual.3	chr2:160092305..160143236,-	BRCA_ctrl	BRCA_cancer	WDSUB1	7.25042	6.31864	-0.194975	0.000335968	4.61503	2.84573	-0.697167	4.44886e-07	0.635	0.451	-0.184	3.31834e-07	3.31834e-07	FALSE	0.999943	TRUE	no	yes	FALSE	0
uc002ubq.1	chr2:161993466..162092682,+	BRCA_ctrl	BRCA_cancer	TANK	44.843	21.5021	-1.11707	6.93591e-102	1.73544	1.73068	-0.0046742	1	0.04	0.082	0.041	1	8.05536e-16	FALSE	0.514478	TRUE	no	no	FALSE	0
uc002ubr.1	chr2:161993466..162092682,+	BRCA_ctrl	BRCA_cancer	TANK	44.843	21.5021	-1.11707	6.93591e-102	27.3646	4.28958	-2.67311	2.77587e-25	0.551	0.151	-0.4	8.05536e-16	8.05536e-16	FALSE	0.999878	TRUE	no	yes	FALSE	0
uc002ubs.2	chr2:161993466..162092682,+	BRCA_ctrl	BRCA_cancer	TANK	44.843	21.5021	-1.11707	6.93591e-102	15.743	15.4818	-0.0238873	0.776486	0.408	0.767	0.359	2.80503e-15	8.05536e-16	FALSE	0.999878	TRUE	no	yes	FALSE	0
uc002ueg.2	chr2:169643049..169721564,+	BRCA_ctrl	BRCA_cancer	NOSTRIN	21.2702	14.5713	-0.544708	4.37381e-05	13.8062	8.23174	-0.745932	0.00121437	0.629	0.455	-0.174	4.2533e-07	4.2533e-07	FALSE	0.999987	TRUE	no	yes	NA	0
uc002uei.2	chr2:169643049..169721564,+	BRCA_ctrl	BRCA_cancer	NOSTRIN	21.2702	14.5713	-0.544708	4.37381e-05	4.06625	3.17764	-0.355602	0.075834	0.195	0.206	0.011	1	4.2533e-07	FALSE	0.999339	TRUE	no	yes	NA	0
uc002uek.2	chr2:169643049..169721564,+	BRCA_ctrl	BRCA_cancer	NOSTRIN	21.2702	14.5713	-0.544708	4.37381e-05	1.77475	1.05993	-0.743524	1.15158e-07	0.084	0.086	0.002	1	4.2533e-07	FALSE	0.62522	TRUE	no	yes	NA	0
uc002uhb.1	chr2:172543982..172604919,+	BRCA_ctrl	BRCA_cancer	DYNC1I2	43.3932	45.2329	-0.00628431	0.998734	13.7095	17.8978	0.384605	1.97635e-06	0.316	0.389	0.072	1	2.80503e-15	FALSE	1	TRUE	no	yes	NA	0
uc002uhc.2	chr2:172543982..172604919,+	BRCA_ctrl	BRCA_cancer	DYNC1I2	43.3932	45.2329	-0.00628431	0.998734	2.35984	2.33238	-0.0165973	0.891151	0.054	0.053	-0.001	1	2.80503e-15	FALSE	1	TRUE	no	yes	NA	0
uc002uhd.1	chr2:172543982..172604919,+	BRCA_ctrl	BRCA_cancer	DYNC1I2	43.3932	45.2329	-0.00628431	0.998734	2.46967	6.62261	1.42194	6.77041e-10	0.056	0.125	0.069	1	2.80503e-15	FALSE	0.999839	TRUE	no	yes	NA	0
uc002uhf.1	chr2:172543982..172604919,+	BRCA_ctrl	BRCA_cancer	DYNC1I2	43.3932	45.2329	-0.00628431	0.998734	24.5995	16.6401	-0.563897	1.16381e-13	0.568	0.397	-0.17	2.80503e-15	2.80503e-15	FALSE	1	TRUE	no	yes	NA	0
uc002uho.1	chr2:173292082..173371181,+	BRCA_ctrl	BRCA_cancer	ITGA6	51.0417	26.4277	-0.988324	7.78972e-21	20.6477	4.86652	-2.08494	6.7443e-10	0.385	0.114	-0.271	6.91704e-15	9.84598e-16	FALSE	1	TRUE	yes	yes	TRUE	0
uc002uhp.1	chr2:173292082..173371181,+	BRCA_ctrl	BRCA_cancer	ITGA6	51.0417	26.4277	-0.988324	7.78972e-21	13.0271	10.131	-0.362707	0.00582037	0.263	0.427	0.165	9.84598e-16	9.84598e-16	FALSE	1	TRUE	yes	yes	TRUE	0
uc010fqm.1	chr2:173292082..173371181,+	BRCA_ctrl	BRCA_cancer	ITGA6	51.0417	26.4277	-0.988324	7.78972e-21	17.2622	11.2864	-0.613037	1.61706e-07	0.35	0.455	0.105	1	9.84598e-16	FALSE	1	TRUE	no	yes	TRUE	0
uc002uhw.3	chr2:173600525..173917618,+	BRCA_ctrl	BRCA_cancer	RAPGEF4	3.08295	2.47174	-0.360834	0.00081872	2.29192	2.21265	-0.0507185	0.732045	0.785	0.917	0.131	1.06842e-06	1.06842e-06	FALSE	1	TRUE	no	yes	NA	NA
uc002uhy.2	chr2:173940565..174132736,+	BRCA_ctrl	BRCA_cancer	ZAK	34.4041	12.9176	-1.63523	9.12181e-115	11.7561	0.92589	-3.66597	9.79776e-21	0.253	0.061	-0.192	2.39843e-09	4.34457e-17	FALSE	0.999974	TRUE	no	yes	TRUE	0
uc002uhz.2	chr2:173940565..174132736,+	BRCA_ctrl	BRCA_cancer	ZAK	34.4041	12.9176	-1.63523	9.12181e-115	4.89114	5.20373	0.0894895	0.400259	0.178	0.404	0.227	4.34457e-17	4.34457e-17	FALSE	1	TRUE	no	yes	TRUE	0
uc010zei.1	chr2:173940565..174132736,+	BRCA_ctrl	BRCA_cancer	ZAK	34.4041	12.9176	-1.63523	9.12181e-115	17.1507	6.28765	-1.44757	3.85723e-80	0.549	0.497	-0.052	1	4.34457e-17	FALSE	0.999225	TRUE	no	yes	TRUE	0
uc002ulb.1	chr2:178077422..178088685,+	BRCA_ctrl	BRCA_cancer	HNRNPA3	45.615	53.768	0.0667329	0.0890974	1.59196	10.9547	2.78105	2.16279e-42	0.035	0.186	0.151	3.4823e-16	3.4823e-16	FALSE	0.999598	TRUE	no	yes	FALSE	0
uc002ulc.1	chr2:178077422..178088685,+	BRCA_ctrl	BRCA_cancer	HNRNPA3	45.615	53.768	0.0667329	0.0890974	18.5683	28.3664	0.611334	0.00457816	0.421	0.545	0.123	1	3.4823e-16	FALSE	0.999471	TRUE	no	yes	FALSE	0
uc002uld.2	chr2:178077422..178088685,+	BRCA_ctrl	BRCA_cancer	HNRNPA3	45.615	53.768	0.0667329	0.0890974	22.2079	12.7428	-0.801363	0.0967151	0.472	0.236	-0.236	0.000267205	3.4823e-16	FALSE	0.998674	TRUE	no	yes	FALSE	0
uc002ule.2	chr2:178077422..178088685,+	BRCA_ctrl	BRCA_cancer	HNRNPA3	45.615	53.768	0.0667329	0.0890974	3.24688	1.704	-0.929764	1.53564e-22	0.072	0.033	-0.038	1	3.4823e-16	FALSE	0.576175	TRUE	no	no	FALSE	0
uc002ull.2	chr2:178257471..178408564,+	BRCA_ctrl	BRCA_cancer	AGPS	8.70942	7.34824	-0.238088	0.0116387	4.1603	4.72618	0.184001	0.388291	0.456	0.583	0.127	2.56534e-05	2.56534e-05	FALSE	1	TRUE	no	yes	TRUE	0
uc010zfb.1	chr2:178257471..178408564,+	BRCA_ctrl	BRCA_cancer	AGPS	8.70942	7.34824	-0.238088	0.0116387	4.54912	2.62205	-0.794824	6.07987e-06	0.544	0.417	-0.127	2.56534e-05	2.56534e-05	FALSE	0.999998	TRUE	no	yes	TRUE	0
uc002ulx.2	chr2:179059374..179260873,+	BRCA_ctrl	BRCA_cancer	OSBPL6	1.58266	2.47729	0.692643	1.83764e-06	0.104522	1.30364	3.63205	1.61015e-14	0.075	0.36	0.285	1.6216e-10	1.6216e-10	FALSE	1	TRUE	no	yes	NA	0
uc002rct.2	chr2:17935162..17966632,+	BRCA_ctrl	BRCA_cancer	GEN1	1.67203	3.12483	0.930806	1.4851e-32	1.36237	1.96779	0.530111	2.30052e-07	0.829	0.667	-0.162	4.81565e-08	4.81565e-08	FALSE	1	TRUE	no	yes	NA	0
uc002unw.2	chr2:182401402..182545381,-	BRCA_ctrl	BRCA_cancer	CERKL	1.00948	1.88481	1.01349	1.52661e-18	0.994549	1.5228	0.612367	1.25067e-09	0.986	0.867	-0.119	1.33402e-12	1.33402e-12	FALSE	0.260035	FALSE	no	no	NA	1
uc002upx.2	chr2:188328960..188419219,-	BRCA_ctrl	BRCA_cancer	TFPI	21.3158	6.07386	-1.91654	1.52347e-72	1.2295	1.45001	0.237817	0.653378	0.063	0.178	0.115	1	1.64651e-10	FALSE	0.962678	TRUE	yes	yes	FALSE	0
uc002upy.2	chr2:188328960..188419219,-	BRCA_ctrl	BRCA_cancer	TFPI	21.3158	6.07386	-1.91654	1.52347e-72	8.31078	1.90418	-2.12544	6.22915e-43	0.394	0.407	0.013	1	1.64651e-10	FALSE	0.962102	TRUE	yes	yes	FALSE	0
uc002upz.2	chr2:188328960..188419219,-	BRCA_ctrl	BRCA_cancer	TFPI	21.3158	6.07386	-1.91654	1.52347e-72	9.09312	1.54625	-2.55569	1.61572e-88	0.422	0.285	-0.137	1.64651e-10	1.64651e-10	FALSE	0.961831	TRUE	yes	yes	FALSE	0
uc002uqa.2	chr2:188328960..188419219,-	BRCA_ctrl	BRCA_cancer	TFPI	21.3158	6.07386	-1.91654	1.52347e-72	1.69005	0.724654	-1.22169	1.77237e-09	0.078	0.099	0.021	1	1.64651e-10	FALSE	0.928376	TRUE	yes	yes	FALSE	0
uc002urb.3	chr2:190634994..190649097,-	BRCA_ctrl	BRCA_cancer	ORMDL1	14.4512	14.4927	-0.0282198	0.610445	5.99266	4.18499	-0.518144	3.73733e-11	0.406	0.291	-0.114	6.55113e-12	6.55113e-12	FALSE	0.217101	FALSE	no	yes	NA	1
uc002urd.3	chr2:190634994..190649097,-	BRCA_ctrl	BRCA_cancer	ORMDL1	14.4512	14.4927	-0.0282198	0.610445	3.05992	4.14373	0.437211	6.72807e-07	0.212	0.282	0.071	1	6.55113e-12	FALSE	0.223009	FALSE	no	yes	NA	0
uc002ure.3	chr2:190634994..190649097,-	BRCA_ctrl	BRCA_cancer	ORMDL1	14.4512	14.4927	-0.0282198	0.610445	4.11704	5.33577	0.373967	0.00234696	0.293	0.368	0.075	1	6.55113e-12	FALSE	0.224169	FALSE	no	yes	NA	0
uc002urf.3	chr2:190634994..190649097,-	BRCA_ctrl	BRCA_cancer	ORMDL1	14.4512	14.4927	-0.0282198	0.610445	1.05317	0.584186	-0.846398	8.46059e-23	0.072	0.042	-0.031	1	6.55113e-12	FALSE	0.0796941	FALSE	no	yes	NA	0
uc002usw.2	chr2:192542798..192553247,+	BRCA_ctrl	BRCA_cancer	OBFC2A	4.36422	2.9817	-0.533605	5.48673e-09	1.32224	0.552453	-1.25808	1.60519e-22	0.305	0.189	-0.116	9.20415e-09	9.20415e-09	FALSE	0.170318	FALSE	no	no	TRUE	0
uc002usx.2	chr2:192542798..192553247,+	BRCA_ctrl	BRCA_cancer	OBFC2A	4.36422	2.9817	-0.533605	5.48673e-09	1.23574	1.22054	-0.0179556	0.953864	0.285	0.404	0.119	2.4795e-07	9.20415e-09	FALSE	0.781101	TRUE	no	yes	TRUE	0
uc002usz.2	chr2:192542798..192553247,+	BRCA_ctrl	BRCA_cancer	OBFC2A	4.36422	2.9817	-0.533605	5.48673e-09	1.00724	0.672604	-0.582292	3.43681e-06	0.227	0.227	0.001	1	9.20415e-09	NA	0.413099	TRUE	NA	NA	TRUE	0
uc002uvx.2	chr2:201450731..201536215,+	BRCA_ctrl	BRCA_cancer	AOX1	13.7154	2.83586	-2.45751	2.56384e-72	9.26475	0.773448	-3.58151	6.88631e-113	0.637	0.293	-0.344	8.16757e-13	8.16757e-13	FALSE	1	TRUE	no	yes	NA	0
uc010zhf.1	chr2:201450731..201536215,+	BRCA_ctrl	BRCA_cancer	AOX1	13.7154	2.83586	-2.45751	2.56384e-72	3.6776	0.690354	-2.41227	1.68787e-44	0.288	0.333	0.045	1	8.16757e-13	FALSE	1	TRUE	no	yes	NA	0
uc002uwd.2	chr2:201717732..201729467,-	BRCA_ctrl	BRCA_cancer	CLK1	58.5733	32.2811	-0.847679	2.90263e-47	6.23103	4.31288	-0.530938	0.0185172	0.102	0.126	0.024	1	1.14511e-16	FALSE	0.98745	TRUE	no	yes	TRUE	0
uc002uwe.2	chr2:201717732..201729467,-	BRCA_ctrl	BRCA_cancer	CLK1	58.5733	32.2811	-0.847679	2.90263e-47	22.78	16.6077	-0.455856	5.18006e-09	0.39	0.53	0.14	2.92238e-14	1.14511e-16	FALSE	0.999997	TRUE	no	yes	TRUE	0
uc002uwf.2	chr2:201717732..201729467,-	BRCA_ctrl	BRCA_cancer	CLK1	58.5733	32.2811	-0.847679	2.90263e-47	14.5459	2.52264	-2.52689	1.24376e-126	0.254	0.081	-0.173	1.14511e-16	1.14511e-16	FALSE	0.920585	TRUE	no	yes	TRUE	0
uc002uwg.2	chr2:201717732..201729467,-	BRCA_ctrl	BRCA_cancer	CLK1	58.5733	32.2811	-0.847679	2.90263e-47	14.8647	8.6804	-0.776016	1.35052e-16	0.251	0.257	0.007	1	1.14511e-16	FALSE	0.995065	TRUE	no	yes	TRUE	1
uc002uyg.1	chr2:202484907..202508224,-	BRCA_ctrl	BRCA_cancer	ALS2CR4	21.3085	11.3837	-1.15293	1.41665e-93	2.07235	2.28417	0.140303	0.410415	0.105	0.208	0.103	1	9.05703e-12	FALSE	0.999759	TRUE	no	yes	FALSE	0
uc002uyh.1	chr2:202484907..202508224,-	BRCA_ctrl	BRCA_cancer	ALS2CR4	21.3085	11.3837	-1.15293	1.41665e-93	5.80162	1.73318	-1.74283	4.41827e-37	0.274	0.156	-0.118	9.05703e-12	9.05703e-12	FALSE	0.999859	TRUE	no	yes	FALSE	0
uc010zho.1	chr2:202484907..202508224,-	BRCA_ctrl	BRCA_cancer	ALS2CR4	21.3085	11.3837	-1.15293	1.41665e-93	2.7243	0.365368	-2.89709	2.03174e-17	0.115	0.037	-0.078	1	9.05703e-12	FALSE	0.705221	TRUE	no	yes	FALSE	0
uc010zhp.1	chr2:202484907..202508224,-	BRCA_ctrl	BRCA_cancer	ALS2CR4	21.3085	11.3837	-1.15293	1.41665e-93	10.7102	7.00099	-0.612901	1.68994e-15	0.506	0.599	0.093	1	9.05703e-12	NA	0.184342	FALSE	NA	NA	FALSE	0
uc002uzv.3	chr2:204103164..204170562,+	BRCA_ctrl	BRCA_cancer	CYP20A1	3.487	2.57499	-0.435236	3.04422e-23	2.28515	1.96157	-0.2202	0.000957367	0.655	0.757	0.102	6.53935e-13	6.53935e-13	FALSE	0.999914	TRUE	no	yes	NA	NA
uc002uzz.2	chr2:204193003..204296891,+	BRCA_ctrl	BRCA_cancer	ABI2	13.5256	10.3868	-0.371273	3.50587e-12	8.84752	7.29948	-0.277481	8.32029e-06	0.654	0.704	0.05	1	2.80705e-16	FALSE	0.999991	TRUE	no	yes	NA	0
uc002vab.2	chr2:204193003..204296891,+	BRCA_ctrl	BRCA_cancer	ABI2	13.5256	10.3868	-0.371273	3.50587e-12	1.0853	1.57657	0.538385	4.98538e-05	0.079	0.152	0.073	1	2.80705e-16	FALSE	0.999784	TRUE	no	yes	NA	0
uc010zik.1	chr2:204193003..204296891,+	BRCA_ctrl	BRCA_cancer	ABI2	13.5256	10.3868	-0.371273	3.50587e-12	2.70102	0.920418	-1.55284	2.41126e-19	0.203	0.088	-0.115	2.80705e-16	2.80705e-16	FALSE	0.978656	TRUE	no	yes	NA	0
uc002vce.2	chr2:208446079..208490065,-	BRCA_ctrl	BRCA_cancer	FAM119A	3.71246	3.96697	0.345442	1.7392e-10	2.66	2.35249	-0.175817	0.00464324	0.71	0.591	-0.119	8.00897e-13	8.00897e-13	FALSE	0.642123	TRUE	no	yes	NA	0
uc010fuk.1	chr2:208446079..208490065,-	BRCA_ctrl	BRCA_cancer	FAM119A	3.71246	3.96697	0.345442	1.7392e-10	0.754044	1.13714	0.592442	5.35953e-05	0.207	0.296	0.089	1	8.00897e-13	FALSE	0.969187	TRUE	no	yes	NA	0
uc002vds.2	chr2:210885437..211036051,-	BRCA_ctrl	BRCA_cancer	C2orf67	5.65728	3.15596	-0.832465	1.14004e-45	3.48869	1.26187	-1.46667	8.40378e-27	0.599	0.37	-0.229	1.14107e-09	2.81854e-11	FALSE	1	TRUE	no	yes	FALSE	0
uc002vdt.2	chr2:210885437..211036051,-	BRCA_ctrl	BRCA_cancer	C2orf67	5.65728	3.15596	-0.832465	1.14004e-45	0.78115	1.16714	0.579095	1.10595e-05	0.162	0.424	0.262	2.81854e-11	2.81854e-11	FALSE	1	TRUE	no	yes	FALSE	0
uc002vhm.1	chr2:219135115..219211515,+	BRCA_ctrl	BRCA_cancer	PNKD	34.49	46.4533	0.943221	4.28208e-34	31.1832	33.3125	0.0953487	0.200044	0.898	0.726	-0.172	1.64738e-15	1.49535e-15	FALSE	0.929888	TRUE	no	no	TRUE	0
uc002vhq.2	chr2:219135115..219211515,+	BRCA_ctrl	BRCA_cancer	PNKD	34.49	46.4533	0.943221	4.28208e-34	3.30109	13.1336	1.99205	4.8122e-52	0.102	0.274	0.172	1.49535e-15	1.49535e-15	FALSE	0.999947	TRUE	yes	yes	TRUE	0
uc002vjw.3	chr2:220042939..220050190,+	BRCA_ctrl	BRCA_cancer	FAM134A	41.3061	49.7435	0.144132	0.000831249	14.2944	12.6783	-0.173031	0.00258306	0.349	0.258	-0.091	1	3.84124e-16	FALSE	1	TRUE	yes	yes	NA	1
uc002vjx.2	chr2:220042939..220050190,+	BRCA_ctrl	BRCA_cancer	FAM134A	41.3061	49.7435	0.144132	0.000831249	25.4615	36.2737	0.510555	2.29328e-25	0.612	0.726	0.113	3.84124e-16	3.84124e-16	FALSE	0.999698	TRUE	yes	no	NA	0
uc010fwc.2	chr2:220042939..220050190,+	BRCA_ctrl	BRCA_cancer	FAM134A	41.3061	49.7435	0.144132	0.000831249	1.55026	0.791535	-0.969285	4.30226e-07	0.039	0.016	-0.022	1	3.84124e-16	FALSE	0.999841	TRUE	yes	no	NA	1
uc002vqa.2	chr2:230787207..230948016,+	BRCA_ctrl	BRCA_cancer	FBXO36	2.77973	3.00715	0.116432	0.27675	1.13451	1.63511	0.52676	0.019067	0.377	0.423	0.047	1	0.00496971	FALSE	0.712338	TRUE	no	yes	NA	0
uc002vqc.2	chr2:230787207..230948016,+	BRCA_ctrl	BRCA_cancer	FBXO36	2.77973	3.00715	0.116432	0.27675	1.28029	0.794584	-0.68781	0.0211432	0.481	0.329	-0.151	0.00496971	0.00496971	NA	0.466264	TRUE	NA	NA	NA	0
uc002vrp.3	chr2:232063342..232238606,+	BRCA_ctrl	BRCA_cancer	ARMC9	3.69814	6.85889	0.833255	1.22209e-33	1.26974	1.6936	0.415216	0.371079	0.368	0.29	-0.077	1	0.00352968	FALSE	1	TRUE	no	no	NA	0
uc002vrq.3	chr2:232063342..232238606,+	BRCA_ctrl	BRCA_cancer	ARMC9	3.69814	6.85889	0.833255	1.22209e-33	1.20655	3.36396	1.47812	9.63288e-10	0.307	0.453	0.146	0.00352968	0.00352968	FALSE	1	TRUE	no	no	NA	0
uc002vrr.1	chr2:232063342..232238606,+	BRCA_ctrl	BRCA_cancer	ARMC9	3.69814	6.85889	0.833255	1.22209e-33	1.22185	1.80133	0.559224	2.1787e-10	0.326	0.256	-0.069	1	0.00352968	NA	0.999958	TRUE	NA	NA	NA	0
uc002vta.2	chr2:233415357..233448349,+	BRCA_ctrl	BRCA_cancer	EIF4E2	32.3904	41.9994	0.0998435	0.00902928	18.1289	29.5726	0.705859	1.97785e-30	0.557	0.687	0.13	6.53935e-13	4.43477e-13	FALSE	0.991096	TRUE	no	yes	FALSE	0
uc002vtb.1	chr2:233415357..233448349,+	BRCA_ctrl	BRCA_cancer	EIF4E2	32.3904	41.9994	0.0998435	0.00902928	12.7205	10.6566	-0.25521	5.60803e-07	0.395	0.269	-0.125	4.43477e-13	4.43477e-13	FALSE	0.986778	TRUE	no	yes	FALSE	0
uc010zmi.1	chr2:233415357..233448349,+	BRCA_ctrl	BRCA_cancer	EIF4E2	32.3904	41.9994	0.0998435	0.00902928	1.32792	1.54264	0.216674	0.00547095	0.042	0.038	-0.004	1	4.43477e-13	FALSE	0.232367	FALSE	no	yes	FALSE	0
uc010zmm.1	chr2:233743396..233877951,-	BRCA_ctrl	BRCA_cancer	NGEF	1.3015	2.47921	0.886101	8.1596e-10	0.875513	1.98795	1.18155	5.04835e-14	0.664	0.805	0.141	1.4833e-08	1.4833e-08	FALSE	0.999999	TRUE	no	yes	NA	0
uc002vty.2	chr2:234160217..234204319,+	BRCA_ctrl	BRCA_cancer	ATG16L1	10.4307	14.5001	0.464347	2.40801e-13	2.33227	0.586386	-1.99062	1.01e-05	0.235	0.05	-0.185	2.51703e-12	2.51703e-12	FALSE	1	TRUE	no	yes	FALSE	0
uc002vua.2	chr2:234160217..234204319,+	BRCA_ctrl	BRCA_cancer	ATG16L1	10.4307	14.5001	0.464347	2.40801e-13	5.18737	10.1202	0.964025	9.38227e-16	0.474	0.67	0.196	2.94953e-12	2.51703e-12	FALSE	1	TRUE	no	yes	FALSE	0
uc002vud.3	chr2:234160217..234204319,+	BRCA_ctrl	BRCA_cancer	ATG16L1	10.4307	14.5001	0.464347	2.40801e-13	2.66038	2.8769	0.11287	0.506721	0.265	0.207	-0.059	1	2.51703e-12	FALSE	0.999999	TRUE	no	yes	FALSE	0
uc002vws.2	chr2:238395053..238463960,+	BRCA_ctrl	BRCA_cancer	MLPH	36.7373	99.5194	1.44653	1.1202e-17	0.47454	1.84868	1.95952	1.12838e-18	0.011	0.018	0.007	1	2.75479e-12	FALSE	0.999998	TRUE	no	yes	NA	0
uc002vwt.2	chr2:238395053..238463960,+	BRCA_ctrl	BRCA_cancer	MLPH	36.7373	99.5194	1.44653	1.1202e-17	8.02735	15.1809	0.91918	1.43912e-05	0.269	0.14	-0.13	2.75479e-12	2.75479e-12	FALSE	1	TRUE	no	yes	NA	0
uc002vwu.2	chr2:238395053..238463960,+	BRCA_ctrl	BRCA_cancer	MLPH	36.7373	99.5194	1.44653	1.1202e-17	10.2885	29.2718	1.5084	2.10153e-12	0.263	0.33	0.067	1	2.75479e-12	FALSE	1	TRUE	no	yes	NA	0
uc002vwv.2	chr2:238395053..238463960,+	BRCA_ctrl	BRCA_cancer	MLPH	36.7373	99.5194	1.44653	1.1202e-17	2.88924	8.55804	1.56622	1.0055e-20	0.082	0.107	0.025	1	2.75479e-12	FALSE	0.999998	TRUE	no	yes	NA	0
uc002vwx.2	chr2:238395053..238463960,+	BRCA_ctrl	BRCA_cancer	MLPH	36.7373	99.5194	1.44653	1.1202e-17	3.33117	14.9489	2.16562	2.58474e-17	0.08	0.114	0.034	1	2.75479e-12	FALSE	0.999995	TRUE	no	yes	NA	0
uc010fyt.1	chr2:238395053..238463960,+	BRCA_ctrl	BRCA_cancer	MLPH	36.7373	99.5194	1.44653	1.1202e-17	11.6142	29.1517	1.32757	9.48632e-12	0.292	0.283	-0.008	1	2.75479e-12	FALSE	1	TRUE	no	yes	NA	0
uc002vxd.2	chr2:238536224..238690288,+	BRCA_ctrl	BRCA_cancer	LRRFIP1	38.1844	39.7193	0.111685	0.0753705	0.42185	1.55418	1.88029	4.32784e-09	0.011	0.035	0.024	1	6.89101e-17	FALSE	1	TRUE	no	yes	TRUE	0
uc002vxe.2	chr2:238536224..238690288,+	BRCA_ctrl	BRCA_cancer	LRRFIP1	38.1844	39.7193	0.111685	0.0753705	2.04816	0.64197	-1.67283	5.84944e-16	0.053	0.016	-0.037	1	6.89101e-17	FALSE	1	TRUE	no	yes	TRUE	0
uc002vxf.2	chr2:238536224..238690288,+	BRCA_ctrl	BRCA_cancer	LRRFIP1	38.1844	39.7193	0.111685	0.0753705	22.9145	33.4985	0.547781	2.16153e-16	0.604	0.835	0.231	6.89101e-17	6.89101e-17	FALSE	1	TRUE	no	yes	TRUE	0
uc002vxg.2	chr2:238536224..238690288,+	BRCA_ctrl	BRCA_cancer	LRRFIP1	38.1844	39.7193	0.111685	0.0753705	1.47305	1.72085	0.223092	0.0137662	0.039	0.049	0.01	1	6.89101e-17	NA	0.416321	TRUE	NA	NA	TRUE	0
uc010znm.1	chr2:238536224..238690288,+	BRCA_ctrl	BRCA_cancer	LRRFIP1	38.1844	39.7193	0.111685	0.0753705	10.3948	1.99276	-2.38277	1.73899e-156	0.278	0.057	-0.222	6.97767e-17	6.89101e-17	FALSE	0.999963	TRUE	no	yes	TRUE	0
uc002vxv.2	chr2:239079044..239112324,-	BRCA_ctrl	BRCA_cancer	ILKAP	12.8023	14.9258	0.254636	1.14997e-08	8.31488	11.6976	0.492727	1.35426e-17	0.647	0.781	0.134	2.8243e-07	2.8243e-07	FALSE	0.999951	TRUE	no	yes	NA	0
uc010zns.1	chr2:239079044..239112324,-	BRCA_ctrl	BRCA_cancer	ILKAP	12.8023	14.9258	0.254636	1.14997e-08	2.01283	1.56161	-0.366269	0.00669452	0.156	0.103	-0.053	1	2.8243e-07	FALSE	0.999474	TRUE	no	yes	NA	0
uc010znt.1	chr2:239079044..239112324,-	BRCA_ctrl	BRCA_cancer	ILKAP	12.8023	14.9258	0.254636	1.14997e-08	2.0219	1.23578	-0.709102	3.45126e-05	0.16	0.087	-0.074	1	2.8243e-07	FALSE	0.820855	TRUE	no	yes	NA	0
uc002vze.2	chr2:241418839..241500275,-	BRCA_ctrl	BRCA_cancer	ANKMY1	3.77029	4.5903	0.223428	0.00283299	1.42707	0.877967	-0.700057	0.00023245	0.39	0.213	-0.177	1.0773e-06	1.0773e-06	FALSE	0.999164	TRUE	no	yes	NA	0
uc002rew.2	chr2:24299728..24397519,+	BRCA_ctrl	BRCA_cancer	LOC375190	4.71931	2.68122	-0.795795	2.38757e-26	2.59723	0.97566	-1.41173	2.23898e-53	0.518	0.375	-0.143	1.0211e-05	7.54317e-06	FALSE	0.26484	FALSE	no	no	TRUE	1
uc010ykl.1	chr2:24299728..24397519,+	BRCA_ctrl	BRCA_cancer	LOC375190	4.71931	2.68122	-0.795795	2.38757e-26	2.02064	1.64427	-0.297438	0.00266099	0.46	0.603	0.143	7.54317e-06	7.54317e-06	FALSE	0.993702	TRUE	no	no	TRUE	0
uc002rgb.2	chr2:25455846..25565459,-	BRCA_ctrl	BRCA_cancer	DNMT3A	5.85558	9.91703	0.870219	4.10794e-38	3.70318	7.72715	1.06109	3.52826e-44	0.627	0.767	0.14	7.19744e-15	3.09357e-15	FALSE	1	TRUE	no	yes	TRUE	0
uc002rge.2	chr2:25455846..25565459,-	BRCA_ctrl	BRCA_cancer	DNMT3A	5.85558	9.91703	0.870219	4.10794e-38	1.42462	1.06359	-0.42134	6.16217e-05	0.258	0.118	-0.14	3.09357e-15	3.09357e-15	FALSE	0.928904	TRUE	no	no	TRUE	0
uc002qwf.2	chr2:264869..278280,+	BRCA_ctrl	BRCA_cancer	ACP1	40.2027	55.3669	0.464104	2.96738e-23	19.4369	34.1278	0.812163	1.80602e-40	0.486	0.61	0.124	5.91686e-14	5.91686e-14	FALSE	0.639784	TRUE	no	yes	NA	0
uc002qwg.2	chr2:264869..278280,+	BRCA_ctrl	BRCA_cancer	ACP1	40.2027	55.3669	0.464104	2.96738e-23	14.6926	17.3196	0.237177	0.000522808	0.362	0.316	-0.046	1	5.91686e-14	FALSE	0.594492	TRUE	no	yes	NA	0
uc002qwh.2	chr2:264869..278280,+	BRCA_ctrl	BRCA_cancer	ACP1	40.2027	55.3669	0.464104	2.96738e-23	5.25765	3.30764	-0.668142	5.84303e-14	0.131	0.062	-0.069	1	5.91686e-14	NA	0.068519	FALSE	NA	NA	NA	0
uc002rpk.2	chr2:36923914..37041929,+	BRCA_ctrl	BRCA_cancer	VIT	11.0039	1.22016	-3.12206	1.38181e-94	1.78866	0.129697	-3.77376	2.35692e-80	0.164	0.098	-0.066	1	1.23387e-15	FALSE	0.861413	TRUE	yes	yes	NA	0
uc002rpl.2	chr2:36923914..37041929,+	BRCA_ctrl	BRCA_cancer	VIT	11.0039	1.22016	-3.12206	1.38181e-94	3.52108	0.231561	-3.92198	3.0049e-14	0.312	0.058	-0.254	1.23387e-15	1.23387e-15	FALSE	1	TRUE	yes	yes	NA	0
uc002rpm.2	chr2:36923914..37041929,+	BRCA_ctrl	BRCA_cancer	VIT	11.0039	1.22016	-3.12206	1.38181e-94	4.32967	0.217791	-4.30818	1.76991e-20	0.399	0.087	-0.312	2.66195e-11	1.23387e-15	FALSE	1	TRUE	yes	yes	NA	0
uc002rsa.2	chr2:40339287..40739575,-	BRCA_ctrl	BRCA_cancer	SLC8A1	2.56027	1.68801	-0.596992	2.59616e-11	1.76852	0.881049	-1.00483	0.000102569	0.643	0.423	-0.22	0.000602708	0.000602708	FALSE	1	TRUE	yes	yes	NA	0
uc002rsp.1	chr2:42721709..42984086,+	BRCA_ctrl	BRCA_cancer	MTA3	16.5021	25.3069	0.406686	8.44641e-16	3.9255	3.16605	-0.310081	0.000285467	0.244	0.132	-0.112	4.34457e-17	4.34457e-17	FALSE	0.999993	TRUE	no	yes	NA	0
uc002rsq.2	chr2:42721709..42984086,+	BRCA_ctrl	BRCA_cancer	MTA3	16.5021	25.3069	0.406686	8.44641e-16	8.91107	13.8948	0.64071	7.14736e-29	0.538	0.549	0.011	1	4.34457e-17	FALSE	0.999987	TRUE	no	yes	NA	0
uc002rsr.2	chr2:42721709..42984086,+	BRCA_ctrl	BRCA_cancer	MTA3	16.5021	25.3069	0.406686	8.44641e-16	3.59276	7.88988	1.13426	3.7692e-36	0.213	0.305	0.092	1	4.34457e-17	FALSE	0.999987	TRUE	no	yes	NA	0
uc002sbz.2	chr2:62901013..63273619,+	BRCA_ctrl	BRCA_cancer	EHBP1	20.696	7.89433	-1.39857	6.81685e-142	15.0978	3.24116	-2.21953	2.36629e-228	0.664	0.413	-0.251	2.24172e-15	2.20182e-15	FALSE	1	TRUE	no	yes	FALSE	0
uc002scb.2	chr2:62901013..63273619,+	BRCA_ctrl	BRCA_cancer	EHBP1	20.696	7.89433	-1.39857	6.81685e-142	5.48904	4.59317	-0.256995	0.000634564	0.331	0.581	0.25	2.20182e-15	2.20182e-15	FALSE	1	TRUE	no	yes	FALSE	0
uc002scl.2	chr2:64068098..64118695,+	BRCA_ctrl	BRCA_cancer	UGP2	147.432	57.5835	-1.38497	9.47821e-138	48.2607	31.0952	-0.634021	4.14216e-22	0.384	0.572	0.188	1.03977e-13	3.49815e-16	FALSE	0.99999	TRUE	no	yes	FALSE	0
uc002scm.2	chr2:64068098..64118695,+	BRCA_ctrl	BRCA_cancer	UGP2	147.432	57.5835	-1.38497	9.47821e-138	79.0671	12.3529	-2.67811	3.1582e-138	0.462	0.18	-0.282	3.49815e-16	3.49815e-16	FALSE	0.999993	TRUE	no	yes	FALSE	0
uc010ypx.1	chr2:64068098..64118695,+	BRCA_ctrl	BRCA_cancer	UGP2	147.432	57.5835	-1.38497	9.47821e-138	20.1044	14.1355	-0.508157	0.00152578	0.154	0.249	0.094	1	3.49815e-16	FALSE	0.999995	TRUE	no	yes	FALSE	0
uc002sdl.3	chr2:65283495..65314141,+	BRCA_ctrl	BRCA_cancer	CEP68	15.7614	6.79754	-1.33754	5.20975e-191	2.81568	1.44011	-0.967095	9.66775e-05	0.176	0.21	0.034	1	1.88941e-07	FALSE	1	TRUE	no	no	NA	0
uc010yqc.1	chr2:65283495..65314141,+	BRCA_ctrl	BRCA_cancer	CEP68	15.7614	6.79754	-1.33754	5.20975e-191	11.0807	3.71131	-1.5779	9.2194e-48	0.7	0.531	-0.169	1.88941e-07	1.88941e-07	FALSE	1	TRUE	no	no	NA	0
uc002sex.2	chr2:68906746..69053948,+	BRCA_ctrl	BRCA_cancer	ARHGAP25	8.76055	5.97256	-0.53312	1.29576e-08	2.36134	1.01595	-1.21628	2.70164e-17	0.276	0.172	-0.104	1	1.46147e-13	FALSE	1	TRUE	no	yes	FALSE	0
uc002sey.2	chr2:68906746..69053948,+	BRCA_ctrl	BRCA_cancer	ARHGAP25	8.76055	5.97256	-0.53312	1.29576e-08	4.78238	3.04625	-0.650798	7.22068e-12	0.547	0.525	-0.022	1	1.46147e-13	FALSE	0.999906	TRUE	no	yes	FALSE	0
uc010fdg.2	chr2:68906746..69053948,+	BRCA_ctrl	BRCA_cancer	ARHGAP25	8.76055	5.97256	-0.53312	1.29576e-08	1.11148	1.5438	0.47376	0.0179042	0.119	0.234	0.115	1.46147e-13	1.46147e-13	FALSE	1	TRUE	no	yes	FALSE	0
uc002sle.2	chr2:74652989..74669060,-	BRCA_ctrl	BRCA_cancer	RTKN	10.9031	22.0405	1.0183	3.12679e-50	8.95282	19.9101	1.15276	5.28933e-46	0.784	0.891	0.106	1.24178e-10	1.24178e-10	FALSE	1	TRUE	no	yes	NA	0
uc002slg.2	chr2:74682199..74688010,+	BRCA_ctrl	BRCA_cancer	INO80B	50.9718	75.0215	0.487518	1.04993e-18	5.68118	9.448	0.733502	8.99202e-11	0.107	0.123	0.016	1	4.86252e-07	FALSE	0.999876	TRUE	no	yes	NA	0
uc002slh.1	chr2:74682199..74688010,+	BRCA_ctrl	BRCA_cancer	WBP1	50.9718	75.0215	0.487518	1.04993e-18	8.96592	9.03891	0.0116571	0.954286	0.181	0.136	-0.045	1	4.86252e-07	NA	0.998853	TRUE	NA	NA	NA	0
uc002slj.1	chr2:74682199..74688010,+	BRCA_ctrl	BRCA_cancer	WBP1	50.9718	75.0215	0.487518	1.04993e-18	27.5627	49.7852	0.852938	5.62443e-20	0.531	0.644	0.113	4.86252e-07	4.86252e-07	FALSE	0.987233	TRUE	no	yes	NA	0
uc002slk.1	chr2:74682199..74688010,+	BRCA_ctrl	BRCA_cancer	WBP1	50.9718	75.0215	0.487518	1.04993e-18	2.6476	0.846418	-1.64306	0.362971	0.058	0.016	-0.042	1	4.86252e-07	FALSE	0.985174	TRUE	no	yes	NA	0
uc002sll.1	chr2:74682199..74688010,+	BRCA_ctrl	BRCA_cancer	WBP1	50.9718	75.0215	0.487518	1.04993e-18	4.95283	4.43398	-0.159838	0.0699053	0.1	0.061	-0.038	1	4.86252e-07	NA	0.136287	FALSE	NA	NA	NA	0
uc002spg.3	chr2:85581843..85618873,+	BRCA_ctrl	BRCA_cancer	ELMOD3	25.9982	8.02123	-1.63595	2.06844e-228	1.9373	1.2707	-0.607829	0.00255639	0.103	0.162	0.059	1	1.03607e-10	FALSE	0.999927	TRUE	no	yes	NA	0
uc002sph.3	chr2:85581843..85618873,+	BRCA_ctrl	BRCA_cancer	ELMOD3	25.9982	8.02123	-1.63595	2.06844e-228	2.44058	1.20088	-1.02247	2.67879e-12	0.137	0.156	0.02	1	1.03607e-10	FALSE	0.999927	TRUE	no	yes	NA	0
uc010ysn.1	chr2:85581843..85618873,+	BRCA_ctrl	BRCA_cancer	ELMOD3	25.9982	8.02123	-1.63595	2.06844e-228	3.39112	1.56697	-1.11294	2.48422e-57	0.151	0.2	0.049	1	1.03607e-10	FALSE	0.999908	TRUE	no	yes	NA	1
uc010yso.1	chr2:85581843..85618873,+	BRCA_ctrl	BRCA_cancer	ELMOD3	25.9982	8.02123	-1.63595	2.06844e-228	1.20851	0.555035	-1.12138	3.19335e-25	0.062	0.07	0.007	1	1.03607e-10	NA	0.99302	TRUE	NA	NA	NA	0
uc010ysp.1	chr2:85581843..85618873,+	BRCA_ctrl	BRCA_cancer	ELMOD3	25.9982	8.02123	-1.63595	2.06844e-228	16.4138	2.93865	-2.48156	7.37308e-221	0.509	0.347	-0.162	1.03607e-10	1.03607e-10	NA	0.77492	TRUE	NA	NA	NA	0
uc002sts.3	chr2:91805192..91847975,-	BRCA_ctrl	BRCA_cancer	LOC654342	22.7	11.0596	-1.12525	7.10369e-53	16.5089	6.6861	-1.30407	6.35492e-62	0.717	0.595	-0.122	3.30859e-15	3.30859e-15	NA	0.01199	FALSE	NA	NA	FALSE	0
uc002stt.2	chr2:91805192..91847975,-	BRCA_ctrl	BRCA_cancer	LOC654342	22.7	11.0596	-1.12525	7.10369e-53	1.68364	0.863075	-0.963776	1.60906e-32	0.077	0.082	0.006	1	3.30859e-15	NA	0.062663	FALSE	NA	NA	FALSE	0
uc010yub.1	chr2:91805192..91847975,-	BRCA_ctrl	BRCA_cancer	LOC654342	22.7	11.0596	-1.12525	7.10369e-53	4.5075	3.51039	-0.361466	8.65483e-05	0.206	0.322	0.116	1.26326e-14	3.30859e-15	NA	0.022472	FALSE	NA	NA	FALSE	0
uc002suq.2	chr2:95963072..96051824,+	BRCA_ctrl	BRCA_cancer	KCNIP3	2.0742	2.18564	0.0884626	0.575091	1.59591	1.28146	-0.316937	0.0457396	0.779	0.579	-0.2	7.25439e-08	7.25439e-08	FALSE	0.999657	TRUE	yes	yes	NA	0
uc002wfc.2	chr20:1422813..1448417,-	BRCA_ctrl	BRCA_cancer	NSFL1C	24.7869	23.5743	0.0569899	0.249622	15.7875	19.9816	0.339927	6.77877e-10	0.643	0.848	0.204	4.73416e-12	4.73416e-12	FALSE	0.999952	TRUE	no	yes	TRUE	0
uc010gag.2	chr20:1422813..1448417,-	BRCA_ctrl	BRCA_cancer	NSFL1C	24.7869	23.5743	0.0569899	0.249622	7.91589	2.49105	-1.66768	2.02874e-25	0.313	0.105	-0.207	9.92831e-12	4.73416e-12	FALSE	0.964005	TRUE	no	yes	TRUE	0
uc002wfl.3	chr20:1545030..1600689,-	BRCA_ctrl	BRCA_cancer	SIRPB1	3.31627	1.94517	-0.79256	2.0027e-13	2.79939	1.25982	-1.15094	1.93509e-27	0.875	0.667	-0.208	1.7988e-15	1.7988e-15	FALSE	0.999978	TRUE	yes	yes	NA	0
uc002wpe.1	chr20:16252749..16554078,-	BRCA_ctrl	BRCA_cancer	KIF16B	11.2822	13.7861	0.183421	0.0784892	1.01381	2.18796	1.10937	6.66966e-13	0.1	0.179	0.08	1	2.75415e-15	FALSE	1	TRUE	no	no	TRUE	0
uc002wpf.1	chr20:16252749..16554078,-	BRCA_ctrl	BRCA_cancer	KIF16B	11.2822	13.7861	0.183421	0.0784892	1.03279	2.04695	0.986047	2.95458e-13	0.098	0.17	0.072	1	2.75415e-15	FALSE	1	TRUE	no	yes	TRUE	0
uc002wpg.1	chr20:16252749..16554078,-	BRCA_ctrl	BRCA_cancer	KIF16B	11.2822	13.7861	0.183421	0.0784892	6.46106	4.35817	-0.567969	0.002053	0.572	0.289	-0.283	6.26424e-14	2.75415e-15	FALSE	1	TRUE	no	yes	TRUE	0
uc010gch.1	chr20:16252749..16554078,-	BRCA_ctrl	BRCA_cancer	KIF16B	11.2822	13.7861	0.183421	0.0784892	1.18742	1.61257	0.441408	0.00376436	0.104	0.117	0.013	1	2.75415e-15	FALSE	1	TRUE	no	yes	TRUE	0
uc010gci.1	chr20:16252749..16554078,-	BRCA_ctrl	BRCA_cancer	KIF16B	11.2822	13.7861	0.183421	0.0784892	1.56092	3.57741	1.19594	9.80702e-18	0.125	0.244	0.12	2.75415e-15	2.75415e-15	FALSE	1	TRUE	no	yes	TRUE	0
uc002wro.1	chr20:19870210..19983100,+	BRCA_ctrl	BRCA_cancer	RIN2	25.0806	25.3342	-0.0275611	0.811788	11.3587	7.83386	-0.535935	2.27285e-06	0.457	0.305	-0.152	1.3841e-11	1.3841e-11	FALSE	1	TRUE	no	yes	NA	0
uc010gcu.1	chr20:19870210..19983100,+	BRCA_ctrl	BRCA_cancer	RIN2	25.0806	25.3342	-0.0275611	0.811788	12.4215	14.3227	0.205418	0.0159706	0.49	0.575	0.085	1	1.3841e-11	FALSE	0.999999	TRUE	no	yes	NA	0
uc010gcv.1	chr20:19870210..19983100,+	BRCA_ctrl	BRCA_cancer	RIN2	25.0806	25.3342	-0.0275611	0.811788	1.3004	3.17762	1.28863	1.23259e-13	0.054	0.12	0.067	1	1.3841e-11	FALSE	1	TRUE	no	yes	NA	0
uc002wta.2	chr20:23355157..23402156,-	BRCA_ctrl	BRCA_cancer	NAPB	3.79231	4.17552	0.140025	0.157467	1.352	2.3971	0.825886	0.00357172	0.357	0.471	0.114	8.12731e-05	3.63e-05	FALSE	0.998077	TRUE	no	yes	TRUE	0
uc002wtc.2	chr20:23355157..23402156,-	BRCA_ctrl	BRCA_cancer	NAPB	3.79231	4.17552	0.140025	0.157467	2.26404	1.5851	-0.514303	0.000281616	0.602	0.499	-0.103	3.63e-05	3.63e-05	FALSE	0.9373	TRUE	no	yes	TRUE	0
uc002wze.1	chr20:32077928..32237837,+	BRCA_ctrl	BRCA_cancer	CBFA2T2	6.28733	6.87032	0.0714473	0.21714	3.46307	2.54809	-0.442558	0.00291058	0.534	0.358	-0.175	2.49631e-09	2.49631e-09	FALSE	1	TRUE	no	yes	TRUE	1
uc002wzj.1	chr20:32077928..32237837,+	BRCA_ctrl	BRCA_cancer	CBFA2T2	6.28733	6.87032	0.0714473	0.21714	1.72363	2.81058	0.705148	2.00743e-27	0.286	0.429	0.143	1	2.49631e-09	NA	1	TRUE	NA	NA	TRUE	0
uc002xdc.2	chr20:34213968..34262539,-	BRCA_ctrl	BRCA_cancer	CPNE1	42.5288	63.9508	0.583684	5.9417e-12	2.31072	3.58852	0.633728	7.11179e-07	0.056	0.057	0.001	1	2.50651e-14	FALSE	0.983876	TRUE	no	yes	NA	1
uc002xde.2	chr20:34213968..34262539,-	BRCA_ctrl	BRCA_cancer	CPNE1	42.5288	63.9508	0.583684	5.9417e-12	4.12987	5.36551	0.377427	0.00045156	0.098	0.086	-0.012	1	2.50651e-14	FALSE	0.999999	TRUE	no	yes	NA	0
uc002xdg.2	chr20:34213968..34262539,-	BRCA_ctrl	BRCA_cancer	CPNE1	42.5288	63.9508	0.583684	5.9417e-12	3.10258	2.62975	-0.238352	0.0574354	0.076	0.045	-0.031	1	2.50651e-14	FALSE	0.999998	TRUE	no	yes	NA	0
uc002xdi.2	chr20:34213968..34262539,-	BRCA_ctrl	BRCA_cancer	CPNE1	42.5288	63.9508	0.583684	5.9417e-12	1.39583	1.52009	0.123068	0.762963	0.031	0.025	-0.006	1	2.50651e-14	FALSE	1	TRUE	no	yes	NA	0
uc002xdj.2	chr20:34213968..34262539,-	BRCA_ctrl	BRCA_cancer	CPNE1	42.5288	63.9508	0.583684	5.9417e-12	1.59797	1.61103	0.0117152	0.977481	0.038	0.028	-0.01	1	2.50651e-14	FALSE	1	TRUE	no	yes	NA	0
uc002xdl.2	chr20:34213968..34262539,-	BRCA_ctrl	BRCA_cancer	CPNE1	42.5288	63.9508	0.583684	5.9417e-12	16.203	20.4548	0.336184	0.0100731	0.377	0.311	-0.067	1	2.50651e-14	FALSE	1	TRUE	no	yes	NA	0
uc002xdm.2	chr20:34213968..34262539,-	BRCA_ctrl	BRCA_cancer	CPNE1	42.5288	63.9508	0.583684	5.9417e-12	7.53291	22.7322	1.59328	2.65659e-21	0.169	0.332	0.163	2.50651e-14	2.50651e-14	FALSE	1	TRUE	no	yes	NA	0
uc010gfi.2	chr20:34213968..34262539,-	BRCA_ctrl	BRCA_cancer	CPNE1	42.5288	63.9508	0.583684	5.9417e-12	1.27412	1.97464	0.631129	2.73323e-09	0.032	0.033	0.002	1	2.50651e-14	NA	0.999988	TRUE	NA	NA	NA	0
uc010gfk.1	chr20:34213968..34262539,-	BRCA_ctrl	BRCA_cancer	CPNE1	42.5288	63.9508	0.583684	5.9417e-12	1.27785	1.05831	-0.271401	0.0109023	0.031	0.02	-0.011	1	2.50651e-14	FALSE	0.999265	TRUE	no	yes	NA	1
uc010zvj.1	chr20:34213968..34262539,-	BRCA_ctrl	BRCA_cancer	CPNE1	42.5288	63.9508	0.583684	5.9417e-12	2.69821	2.1591	-0.321333	0.026429	0.068	0.045	-0.023	1	2.50651e-14	FALSE	1	TRUE	no	yes	NA	0
uc002xen.1	chr20:34541546..34547394,-	BRCA_ctrl	BRCA_cancer	SCAND1	20.0751	46.1879	1.14826	2.76531e-24	4.93094	17.6305	1.83792	1.50696e-23	0.221	0.347	0.126	3.02771e-12	3.02771e-12	FALSE	0.991098	TRUE	no	yes	TRUE	0
uc002xeo.2	chr20:34541546..34547394,-	BRCA_ctrl	BRCA_cancer	SCAND1	20.0751	46.1879	1.14826	2.76531e-24	14.0118	26.96	0.944068	7.87809e-18	0.717	0.611	-0.106	1	3.02771e-12	FALSE	0.99104	TRUE	no	yes	TRUE	1
uc002xep.2	chr20:34541546..34547394,-	BRCA_ctrl	BRCA_cancer	SCAND1	20.0751	46.1879	1.14826	2.76531e-24	1.13241	1.59742	0.496759	2.32626e-07	0.062	0.043	-0.02	1	3.02771e-12	FALSE	0.990574	TRUE	no	yes	TRUE	1
uc002wdm.2	chr20:361308..378201,+	BRCA_ctrl	BRCA_cancer	TRIB3	6.9482	20.9241	1.60161	3.33553e-58	2.68338	11.7613	2.13135	1.84902e-38	0.321	0.536	0.215	4.19334e-07	4.19334e-07	FALSE	0.999967	TRUE	no	yes	FALSE	0
uc002wdn.2	chr20:361308..378201,+	BRCA_ctrl	BRCA_cancer	TRIB3	6.9482	20.9241	1.60161	3.33553e-58	4.26482	9.16283	1.10299	3.22905e-16	0.679	0.464	-0.215	4.19334e-07	4.19334e-07	FALSE	0.999981	TRUE	no	yes	FALSE	0
uc002xhd.2	chr20:36149607..36152088,+	BRCA_ctrl	BRCA_cancer	NNAT	18.0097	1.29041	-3.80893	7.16402e-175	8.87593	0.529262	-4.06363	5.47071e-36	0.404	0.184	-0.22	8.74399e-08	8.74399e-08	FALSE	0.62687	TRUE	no	no	TRUE	0
uc002xhe.2	chr20:36149607..36152088,+	BRCA_ctrl	BRCA_cancer	NNAT	18.0097	1.29041	-3.80893	7.16402e-175	9.13376	0.761148	-3.58216	4.17808e-173	0.596	0.816	0.22	8.74399e-08	8.74399e-08	FALSE	0.0614835	FALSE	no	no	TRUE	0
uc002xje.2	chr20:37434348..37551666,+	BRCA_ctrl	BRCA_cancer	PPP1R16B	7.14654	1.92339	-1.89882	1.70253e-65	4.90812	1.15085	-2.09212	8.43365e-27	0.661	0.458	-0.203	7.67252e-05	7.57837e-05	FALSE	1	TRUE	no	yes	TRUE	0
uc010ggc.2	chr20:37434348..37551666,+	BRCA_ctrl	BRCA_cancer	PPP1R16B	7.14654	1.92339	-1.89882	1.70253e-65	2.23033	0.768621	-1.53654	1.01672e-29	0.338	0.54	0.202	7.57837e-05	7.57837e-05	FALSE	1	TRUE	no	yes	TRUE	0
uc002wdo.2	chr20:388709..411608,+	BRCA_ctrl	BRCA_cancer	RBCK1	29.2573	41.8549	0.39504	2.30976e-11	10.6428	19.7783	0.893894	1.63452e-34	0.365	0.47	0.105	8.8654e-17	8.8654e-17	NA	0.593502	TRUE	NA	NA	TRUE	0
uc002wdp.3	chr20:388709..411608,+	BRCA_ctrl	BRCA_cancer	RBCK1	29.2573	41.8549	0.39504	2.30976e-11	16.4448	18.0039	0.130717	0.0979566	0.555	0.44	-0.115	5.54858e-14	8.8654e-17	FALSE	1	TRUE	no	yes	TRUE	0
uc002wdr.3	chr20:388709..411608,+	BRCA_ctrl	BRCA_cancer	RBCK1	29.2573	41.8549	0.39504	2.30976e-11	1.72245	2.83027	0.715799	0.000297094	0.065	0.064	-0.001	1	8.8654e-17	FALSE	0.999621	TRUE	no	yes	TRUE	0
uc002wki.2	chr20:3912069..3996216,-	BRCA_ctrl	BRCA_cancer	RNF24	4.98409	6.25078	0.330972	0.000771377	1.21114	2.34759	0.954355	0.00124302	0.217	0.317	0.1	1	0.00285842	FALSE	0.430331	TRUE	no	yes	NA	0
uc002wkj.2	chr20:3912069..3996216,-	BRCA_ctrl	BRCA_cancer	RNF24	4.98409	6.25078	0.330972	0.000771377	3.74991	3.8417	0.0347827	0.823652	0.778	0.673	-0.104	0.00285842	0.00285842	FALSE	0.353644	FALSE	no	yes	NA	0
uc002xjq.1	chr20:39807089..39946242,-	BRCA_ctrl	BRCA_cancer	ZHX3	8.91872	4.57749	-1.04124	8.45224e-69	2.59563	0.646556	-2.00476	7.83837e-39	0.298	0.143	-0.155	1.46434e-15	2.33804e-16	FALSE	0.997018	TRUE	no	no	TRUE	0
uc002xjs.1	chr20:39807089..39946242,-	BRCA_ctrl	BRCA_cancer	ZHX3	8.91872	4.57749	-1.04124	8.45224e-69	2.21394	0.801905	-1.46485	0.00098641	0.232	0.148	-0.084	1	2.33804e-16	FALSE	1	TRUE	no	yes	TRUE	0
uc002xju.1	chr20:39807089..39946242,-	BRCA_ctrl	BRCA_cancer	ZHX3	8.91872	4.57749	-1.04124	8.45224e-69	1.93789	1.15459	-0.746997	0.00222038	0.243	0.286	0.043	1	2.33804e-16	FALSE	1	TRUE	no	yes	TRUE	0
uc002xjw.1	chr20:39807089..39946242,-	BRCA_ctrl	BRCA_cancer	ZHX3	8.91872	4.57749	-1.04124	8.45224e-69	1.46682	1.26091	-0.217489	0.108458	0.15	0.267	0.118	2.33804e-16	2.33804e-16	FALSE	1	TRUE	no	yes	TRUE	0
uc002xlb.1	chr20:42295709..42345122,+	BRCA_ctrl	BRCA_cancer	MYBL2	1.54563	21.7778	3.8266	7.75251e-79	1.04076	19.6597	4.23856	5.98891e-59	0.485	0.852	0.367	2.74682e-08	2.11518e-08	FALSE	1	TRUE	no	yes	TRUE	0
uc010zwj.1	chr20:42295709..42345122,+	BRCA_ctrl	BRCA_cancer	MYBL2	1.54563	21.7778	3.8266	7.75251e-79	0.47846	1.83911	1.94052	8.44612e-06	0.496	0.133	-0.363	2.11518e-08	2.11518e-08	FALSE	1	TRUE	no	yes	TRUE	0
uc002xpm.2	chr20:44441255..44445594,+	BRCA_ctrl	BRCA_cancer	UBE2C	2.62955	47.1288	4.16044	3.0104e-115	2.23862	43.5588	4.28053	3.35348e-113	0.771	0.926	0.155	4.18133e-08	4.18133e-08	FALSE	0.95586	TRUE	no	yes	NA	0
uc002xpt.1	chr20:44462470..44471914,+	BRCA_ctrl	BRCA_cancer	SNX21	14.2107	7.49756	-0.958867	3.24794e-56	1.83032	1.27271	-0.523666	0.000112824	0.143	0.176	0.032	1	1.61428e-10	FALSE	0.992558	TRUE	no	no	NA	0
uc002xpv.1	chr20:44462470..44471914,+	BRCA_ctrl	BRCA_cancer	SNX21	14.2107	7.49756	-0.958867	3.24794e-56	2.7187	1.56494	-0.796403	1.21553e-05	0.202	0.202	0	1	1.61428e-10	FALSE	0.999988	TRUE	no	yes	NA	0
uc002xpy.1	chr20:44462470..44471914,+	BRCA_ctrl	BRCA_cancer	SNX21	14.2107	7.49756	-0.958867	3.24794e-56	1.02109	0.473402	-1.1073	5.27194e-40	0.082	0.071	-0.011	1	1.61428e-10	FALSE	0.992548	TRUE	no	yes	NA	0
uc002xpz.1	chr20:44462470..44471914,+	BRCA_ctrl	BRCA_cancer	SNX21	14.2107	7.49756	-0.958867	3.24794e-56	4.91228	3.11276	-0.658263	7.24894e-12	0.336	0.388	0.052	1	1.61428e-10	FALSE	0.993056	TRUE	no	yes	NA	1
uc010zxd.1	chr20:44462470..44471914,+	BRCA_ctrl	BRCA_cancer	SNX21	14.2107	7.49756	-0.958867	3.24794e-56	2.76619	0.48959	-2.49646	7.19713e-18	0.166	0.063	-0.103	1.61428e-10	1.61428e-10	FALSE	0.992584	TRUE	no	no	NA	0
uc002xsc.2	chr20:45129709..45142194,-	BRCA_ctrl	BRCA_cancer	ZNF334	3.28184	1.54057	-1.11097	1.35619e-14	1.59165	0.872195	-0.867556	9.38238e-07	0.478	0.601	0.123	0.000417236	0.000417236	FALSE	1	TRUE	no	yes	NA	0
uc002xvp.1	chr20:49411467..49493713,+	BRCA_ctrl	BRCA_cancer	BCAS4	36.9799	50.7921	0.634604	4.09242e-17	33.8757	33.8629	-0.000532961	1	0.895	0.671	-0.225	7.49681e-15	7.49681e-15	FALSE	0.949252	TRUE	no	no	TRUE	0
uc002xvq.2	chr20:49411467..49493713,+	BRCA_ctrl	BRCA_cancer	BCAS4	36.9799	50.7921	0.634604	4.09242e-17	0.204345	1.59594	2.94786	5.03586e-48	0.007	0.03	0.023	1	7.49681e-15	FALSE	0.994146	TRUE	no	no	TRUE	0
uc002xvr.2	chr20:49411467..49493713,+	BRCA_ctrl	BRCA_cancer	BCAS4	36.9799	50.7921	0.634604	4.09242e-17	2.84257	14.8406	2.3828	6.35492e-62	0.096	0.29	0.194	2.45682e-14	7.49681e-15	FALSE	0.994751	TRUE	no	no	TRUE	0
uc002xwy.2	chr20:53092257..53267709,+	BRCA_ctrl	BRCA_cancer	DOK5	3.01683	1.69066	-0.838973	4.01343e-11	2.61345	1.35017	-0.951778	2.35089e-06	0.842	0.667	-0.175	0.0068562	0.0068562	FALSE	0.99605	TRUE	no	yes	NA	NA
uc002xyq.2	chr20:56223454..56286541,-	BRCA_ctrl	BRCA_cancer	PMEPA1	34.036	33.5557	-0.0087641	1	8.50319	11.4935	0.43482	0.000173067	0.263	0.353	0.09	1	2.19757e-11	FALSE	0.999729	TRUE	no	no	TRUE	0
uc002xyr.2	chr20:56223454..56286541,-	BRCA_ctrl	BRCA_cancer	PMEPA1	34.036	33.5557	-0.0087641	1	19.5184	7.82534	-1.31856	4.18781e-07	0.556	0.268	-0.288	2.19757e-11	2.19757e-11	FALSE	0.998539	TRUE	yes	no	TRUE	0
uc002xys.2	chr20:56223454..56286541,-	BRCA_ctrl	BRCA_cancer	PMEPA1	34.036	33.5557	-0.0087641	1	4.42934	13.3644	1.59311	5.18468e-07	0.151	0.361	0.21	1.53565e-09	2.19757e-11	FALSE	0.999352	TRUE	no	no	TRUE	0
uc002xyt.2	chr20:56223454..56286541,-	BRCA_ctrl	BRCA_cancer	PMEPA1	34.036	33.5557	-0.0087641	1	1.58511	0.872435	-0.861094	0.193712	0.03	0.017	-0.012	1	2.19757e-11	FALSE	0.998534	TRUE	yes	no	TRUE	0
uc002ybc.2	chr20:58508819..58522559,+	BRCA_ctrl	BRCA_cancer	C20orf177	4.0512	3.69008	-0.115194	0.257998	3.6471	2.81102	-0.375361	0.00487306	0.891	0.733	-0.158	5.07735e-06	5.07735e-06	FALSE	0.999356	TRUE	no	yes	NA	NA
uc002wmg.2	chr20:5891974..5906003,+	BRCA_ctrl	BRCA_cancer	CHGB	1.22831	45.0962	5.20348	4.60662e-16	1.16178	44.4598	5.25731	3.29173e-09	0.715	0.544	-0.17	0.00340179	0.00340179	FALSE	1	TRUE	yes	yes	NA	NA
uc002wmn.3	chr20:5986739..6020694,+	BRCA_ctrl	BRCA_cancer	CRLS1	12.932	10.8647	-0.244723	1.85046e-06	11.009	9.88162	-0.155672	0.027303	0.809	0.915	0.106	0.000336877	0.000165371	FALSE	0.989304	TRUE	no	yes	TRUE	0
uc010gbr.2	chr20:5986739..6020694,+	BRCA_ctrl	BRCA_cancer	CRLS1	12.932	10.8647	-0.244723	1.85046e-06	1.84682	0.902775	-1.03214	0.12321	0.185	0.077	-0.108	0.000165371	0.000165371	FALSE	0.786847	TRUE	no	yes	TRUE	0
uc002yfg.2	chr20:62159778..62168707,-	BRCA_ctrl	BRCA_cancer	PTK6	2.03288	7.93034	1.96068	3.27225e-41	1.10196	5.06411	2.19877	4.74343e-25	0.392	0.584	0.192	1.31857e-05	1.31857e-05	FALSE	0.999999	TRUE	no	yes	TRUE	0
uc011aay.1	chr20:62159778..62168707,-	BRCA_ctrl	BRCA_cancer	PTK6	2.03288	7.93034	1.96068	3.27225e-41	0.547796	1.86468	1.76566	1.06651e-12	0.365	0.259	-0.106	1	1.31857e-05	FALSE	0.999978	TRUE	no	yes	TRUE	0
uc002wef.1	chr20:814356..838103,+	BRCA_ctrl	BRCA_cancer	FAM110A	7.66588	20.6692	1.43351	1.06534e-52	1.47948	3.42455	1.21033	1.71219e-23	0.232	0.185	-0.047	1	8.08615e-09	FALSE	0.998657	TRUE	no	yes	FALSE	0
uc002weg.1	chr20:814356..838103,+	BRCA_ctrl	BRCA_cancer	FAM110A	7.66588	20.6692	1.43351	1.06534e-52	3.60793	5.22907	0.535123	0.128228	0.481	0.287	-0.194	0.000514174	8.08615e-09	FALSE	0.998672	TRUE	no	yes	FALSE	0
uc002weh.1	chr20:814356..838103,+	BRCA_ctrl	BRCA_cancer	FAM110A	7.66588	20.6692	1.43351	1.06534e-52	2.38905	11.7693	2.29953	1.24068e-30	0.256	0.514	0.259	8.08615e-09	8.08615e-09	FALSE	0.998671	TRUE	no	yes	FALSE	0
uc002wni.1	chr20:9495271..9511171,+	BRCA_ctrl	BRCA_cancer	C20orf103	1.19969	8.95578	2.90662	3.33256e-58	1.04824	8.50917	3.01916	2.31162e-48	0.713	0.912	0.199	4.31148e-07	4.31148e-07	FALSE	0.998813	TRUE	yes	yes	NA	NA
uc002ylz.2	chr21:27252862..27543446,-	BRCA_ctrl	BRCA_cancer	APP	445.469	345.965	-0.391206	4.49986e-07	224.55	117.42	-0.935355	2.10965e-22	0.52	0.338	-0.182	1.40428e-15	1.40428e-15	FALSE	1	TRUE	yes	yes	FALSE	0
uc002yma.2	chr21:27252862..27543446,-	BRCA_ctrl	BRCA_cancer	APP	445.469	345.965	-0.391206	4.49986e-07	139.446	145.308	0.0594035	0.624755	0.3	0.423	0.122	1.11049e-11	1.40428e-15	FALSE	1	TRUE	yes	yes	FALSE	0
uc011acg.1	chr21:27252862..27543446,-	BRCA_ctrl	BRCA_cancer	APP	445.469	345.965	-0.391206	4.49986e-07	65.191	61.5453	-0.0830325	0.797812	0.143	0.176	0.033	1	1.40428e-15	FALSE	0.999456	TRUE	no	yes	FALSE	0
uc011ach.1	chr21:27252862..27543446,-	BRCA_ctrl	BRCA_cancer	APP	445.469	345.965	-0.391206	4.49986e-07	1.25319	2.65489	1.08262	0.0731506	0.003	0.007	0.004	1	1.40428e-15	FALSE	1	TRUE	yes	yes	FALSE	0
uc011aci.1	chr21:27252862..27543446,-	BRCA_ctrl	BRCA_cancer	APP	445.469	345.965	-0.391206	4.49986e-07	14.6144	18.785	0.362155	0.0033251	0.033	0.055	0.022	1	1.40428e-15	FALSE	1	TRUE	no	yes	FALSE	0
uc002yng.2	chr21:30449812..30548200,+	BRCA_ctrl	BRCA_cancer	C21orf7	2.53202	2.4628	-0.0935071	0.264512	1.04995	0.889753	-0.235766	0.0774575	0.408	0.346	-0.062	1	9.47979e-10	FALSE	0.936549	TRUE	no	no	NA	0
uc010glp.2	chr21:30449812..30548200,+	BRCA_ctrl	BRCA_cancer	C21orf7	2.53202	2.4628	-0.0935071	0.264512	1.03879	1.33255	0.362516	0.000690017	0.38	0.554	0.173	9.47979e-10	9.47979e-10	NA	0.768491	TRUE	NA	NA	NA	0
uc002ysj.2	chr21:34947783..35284703,-	BRCA_ctrl	BRCA_cancer	DONSON	3.38298	8.872	1.33566	1.46718e-46	2.16496	5.51308	1.34787	7.18219e-57	0.64	0.654	0.014	1	5.05102e-10	FALSE	0.793529	TRUE	no	no	NA	0
uc002ysk.2	chr21:34947783..35284703,-	BRCA_ctrl	BRCA_cancer	DONSON	3.38298	8.872	1.33566	1.46718e-46	0.530389	2.79156	2.39404	9.26232e-35	0.152	0.268	0.116	5.05102e-10	5.05102e-10	FALSE	0.999999	TRUE	no	no	NA	0
uc002ytu.3	chr21:35747749..35775074,+	BRCA_ctrl	BRCA_cancer	FAM165B	16.3725	16.8908	-0.018265	0.811712	11.1194	13.5163	0.281416	2.89279e-06	0.676	0.793	0.117	2.72103e-16	2.457e-16	FALSE	0.0424637	FALSE	no	yes	TRUE	0
uc002ytw.2	chr21:35747749..35775074,+	BRCA_ctrl	BRCA_cancer	FAM165B	16.3725	16.8908	-0.018265	0.811712	4.62462	2.79778	-0.724379	2.67048e-31	0.285	0.172	-0.113	2.457e-16	2.457e-16	NA	0.00385006	FALSE	NA	NA	TRUE	0
uc002yub.2	chr21:35888786..35987382,-	BRCA_ctrl	BRCA_cancer	RCAN1	97.9595	28.576	-1.80858	7.85785e-67	79.3749	16.2438	-2.28873	7.30626e-64	0.765	0.467	-0.298	3.15189e-11	3.15189e-11	FALSE	0.915957	TRUE	no	yes	TRUE	0
uc002yuc.2	chr21:35888786..35987382,-	BRCA_ctrl	BRCA_cancer	RCAN1	97.9595	28.576	-1.80858	7.85785e-67	14.936	10.6681	-0.485495	0.00036136	0.186	0.45	0.264	8.99615e-11	3.15189e-11	FALSE	0.852485	TRUE	no	yes	TRUE	0
uc002yue.2	chr21:35888786..35987382,-	BRCA_ctrl	BRCA_cancer	RCAN1	97.9595	28.576	-1.80858	7.85785e-67	1.67249	1.14786	-0.542134	0.000273926	0.028	0.066	0.038	1	3.15189e-11	FALSE	0.99782	TRUE	no	yes	TRUE	0
uc011adx.1	chr21:35888786..35987382,-	BRCA_ctrl	BRCA_cancer	RCAN1	97.9595	28.576	-1.80858	7.85785e-67	1.9662	0.502468	-1.96461	7.41003e-57	0.021	0.017	-0.004	1	3.15189e-11	FALSE	0.875476	TRUE	no	yes	TRUE	0
uc002yuu.2	chr21:37406840..37451687,-	BRCA_ctrl	BRCA_cancer	SETD4	6.59063	6.45595	-0.113214	0.0149028	2.58862	2.40312	-0.108105	0.106406	0.389	0.373	-0.015	1	2.07437e-12	NA	0.0797362	FALSE	NA	NA	NA	0
uc002yux.1	chr21:37406840..37451687,-	BRCA_ctrl	BRCA_cancer	SETD4	6.59063	6.45595	-0.113214	0.0149028	1.11834	0.892361	-0.325508	7.57194e-05	0.171	0.142	-0.029	1	2.07437e-12	FALSE	0.999732	TRUE	no	yes	NA	1
uc002yuy.2	chr21:37406840..37451687,-	BRCA_ctrl	BRCA_cancer	SETD4	6.59063	6.45595	-0.113214	0.0149028	1.92481	2.7048	0.490584	3.67781e-10	0.297	0.412	0.115	2.07437e-12	2.07437e-12	FALSE	0.987488	TRUE	no	yes	NA	0
uc002yzb.1	chr21:42676177..42729654,+	BRCA_ctrl	BRCA_cancer	FAM3B	11.4084	10.1432	-0.167719	0.562509	9.18802	7.51974	-0.289026	0.441295	0.714	0.531	-0.182	3.15296e-05	3.15296e-05	FALSE	0.973768	TRUE	no	no	FALSE	0
uc002yzd.1	chr21:42676177..42729654,+	BRCA_ctrl	BRCA_cancer	FAM3B	11.4084	10.1432	-0.167719	0.562509	1.46853	1.61062	0.133005	0.758135	0.19	0.297	0.107	1	3.15296e-05	FALSE	0.98339	TRUE	no	no	FALSE	0
uc002yzj.2	chr21:42836479..42903043,-	BRCA_ctrl	BRCA_cancer	TMPRSS2	13.4779	5.78947	-1.21597	1.1087e-17	10.3678	3.39673	-1.60974	1.75203e-18	0.733	0.614	-0.119	0.00578092	0.00172625	FALSE	0.999995	TRUE	no	yes	FALSE	0
uc010gor.2	chr21:42836479..42903043,-	BRCA_ctrl	BRCA_cancer	TMPRSS2	13.4779	5.78947	-1.21597	1.1087e-17	3.10916	2.39187	-0.378282	0.26791	0.243	0.383	0.141	0.00172625	0.00172625	FALSE	0.999998	TRUE	no	yes	FALSE	0
uc002zao.2	chr21:43619799..43717352,+	BRCA_ctrl	BRCA_cancer	ABCG1	10.3937	18.0065	0.798816	2.32562e-16	3.05614	2.69078	-0.18366	0.792289	0.318	0.232	-0.086	1	0.000104341	FALSE	1	TRUE	no	yes	NA	0
uc002zap.2	chr21:43619799..43717352,+	BRCA_ctrl	BRCA_cancer	ABCG1	10.3937	18.0065	0.798816	2.32562e-16	2.94027	8.71392	1.56711	5.45557e-06	0.264	0.403	0.139	0.000104341	0.000104341	FALSE	1	TRUE	no	yes	NA	0
uc002zaq.2	chr21:43619799..43717352,+	BRCA_ctrl	BRCA_cancer	ABCG1	10.3937	18.0065	0.798816	2.32562e-16	3.99696	6.17013	0.626497	7.56502e-07	0.377	0.336	-0.041	1	0.000104341	FALSE	1	TRUE	no	yes	NA	0
uc002zbm.2	chr21:44073862..44195616,+	BRCA_ctrl	BRCA_cancer	PDE9A	8.93242	4.37661	-1.07584	1.50682e-16	4.38078	1.36327	-1.68328	6.84992e-16	0.478	0.258	-0.22	4.49396e-14	4.49396e-14	FALSE	1	TRUE	no	yes	NA	0
uc002zbx.2	chr21:44073862..44195616,+	BRCA_ctrl	BRCA_cancer	PDE9A	8.93242	4.37661	-1.07584	1.50682e-16	3.38947	1.88156	-0.848674	0.000143556	0.39	0.362	-0.028	1	4.49396e-14	FALSE	1	TRUE	no	yes	NA	0
uc002zhg.2	chr21:46825097..46933633,+	BRCA_ctrl	BRCA_cancer	COL18A1	39.145	55.2122	0.447809	1.97084e-06	12.9294	26.8743	1.05556	1.79128e-10	0.301	0.463	0.162	7.88654e-10	9.57018e-12	FALSE	1	TRUE	yes	yes	TRUE	0
uc002zhi.2	chr21:46825097..46933633,+	BRCA_ctrl	BRCA_cancer	COL18A1	39.145	55.2122	0.447809	1.97084e-06	10.9069	5.68682	-0.939501	3.58821e-12	0.294	0.114	-0.18	9.57018e-12	9.57018e-12	FALSE	1	TRUE	yes	yes	TRUE	0
uc002zhj.2	chr21:46825097..46933633,+	BRCA_ctrl	BRCA_cancer	COL18A1	39.145	55.2122	0.447809	1.97084e-06	4.38593	8.81313	1.0067	4.09715e-11	0.107	0.14	0.033	1	9.57018e-12	FALSE	0.999921	TRUE	no	yes	TRUE	1
uc002zhk.2	chr21:46825097..46933633,+	BRCA_ctrl	BRCA_cancer	COL18A1	39.145	55.2122	0.447809	1.97084e-06	10.7063	13.6901	0.354502	0.00110879	0.292	0.28	-0.012	1	9.57018e-12	FALSE	0.477636	TRUE	no	yes	TRUE	0
uc002zhl.1	chr21:46918115..46964325,-	BRCA_ctrl	BRCA_cancer	SLC19A1	3.85094	7.95291	1.06054	3.61951e-33	1.57435	4.93789	1.64871	1.5926e-10	0.419	0.601	0.183	0.00117892	0.00117892	FALSE	1	TRUE	no	yes	NA	0
uc010gpz.1	chr21:46918115..46964325,-	BRCA_ctrl	BRCA_cancer	SLC19A1	3.85094	7.95291	1.06054	3.61951e-33	0.956381	1.1909	0.316263	0.386401	0.26	0.171	-0.089	1	0.00117892	FALSE	1	TRUE	no	yes	NA	0
uc011aft.1	chr21:46918115..46964325,-	BRCA_ctrl	BRCA_cancer	SLC19A1	3.85094	7.95291	1.06054	3.61951e-33	1.04363	1.29122	0.30682	0.548068	0.257	0.163	-0.094	1	0.00117892	FALSE	1	TRUE	no	yes	NA	0
uc002zhy.1	chr21:47518033..47552763,+	BRCA_ctrl	BRCA_cancer	COL6A2	243.123	322.238	0.310921	0.0103222	2.80356	1.82791	-0.616964	3.81967e-08	0.012	0.006	-0.006	1	2.00708e-11	FALSE	1	TRUE	yes	yes	TRUE	0
uc002zhz.1	chr21:47518033..47552763,+	BRCA_ctrl	BRCA_cancer	COL6A2	243.123	322.238	0.310921	0.0103222	69.7928	50.0736	-0.479021	4.69616e-06	0.292	0.177	-0.115	1	2.00708e-11	FALSE	1	TRUE	yes	yes	TRUE	0
uc002zia.1	chr21:47518033..47552763,+	BRCA_ctrl	BRCA_cancer	COL6A2	243.123	322.238	0.310921	0.0103222	84.6281	136.34	0.688001	1.50496e-06	0.332	0.435	0.103	2.00708e-11	2.00708e-11	FALSE	1	TRUE	yes	yes	TRUE	0
uc002zib.1	chr21:47518033..47552763,+	BRCA_ctrl	BRCA_cancer	COL6A2	243.123	322.238	0.310921	0.0103222	60.6582	81.6598	0.428916	0.00413605	0.256	0.26	0.004	1	2.00708e-11	FALSE	1	TRUE	no	yes	TRUE	0
uc002zic.1	chr21:47518033..47552763,+	BRCA_ctrl	BRCA_cancer	COL6A2	243.123	322.238	0.310921	0.0103222	7.74404	39.4987	2.3504	1.10358e-19	0.028	0.076	0.049	1	2.00708e-11	FALSE	0.279926	FALSE	no	no	TRUE	0
uc010gqe.1	chr21:47518033..47552763,+	BRCA_ctrl	BRCA_cancer	COL6A2	243.123	322.238	0.310921	0.0103222	17.4967	12.8379	-0.446674	2.29729e-05	0.08	0.045	-0.035	1	2.00708e-11	NA	0.999602	TRUE	NA	NA	TRUE	0
uc002zjw.2	chr21:48055527..48084862,+	BRCA_ctrl	BRCA_cancer	PRMT2	51.1014	42.3877	-0.321099	4.30278e-12	22.3614	14.8665	-0.588904	2.70019e-34	0.439	0.358	-0.081	1	4.34457e-17	FALSE	0.999474	TRUE	no	yes	FALSE	0
uc002zjx.2	chr21:48055527..48084862,+	BRCA_ctrl	BRCA_cancer	PRMT2	51.1014	42.3877	-0.321099	4.30278e-12	21.4869	8.55533	-1.32841	3.94914e-101	0.424	0.208	-0.216	4.34457e-17	4.34457e-17	FALSE	0.999993	TRUE	no	yes	FALSE	0
uc002zjy.2	chr21:48055527..48084862,+	BRCA_ctrl	BRCA_cancer	PRMT2	51.1014	42.3877	-0.321099	4.30278e-12	3.84574	12.9774	1.75422	4.28087e-28	0.07	0.299	0.229	8.66148e-17	4.34457e-17	FALSE	0.999993	TRUE	no	yes	FALSE	0
uc002zjz.1	chr21:48055527..48084862,+	BRCA_ctrl	BRCA_cancer	PRMT2	51.1014	42.3877	-0.321099	4.30278e-12	1.95029	1.39329	-0.485978	2.00445e-15	0.039	0.033	-0.006	1	4.34457e-17	FALSE	0.993404	TRUE	no	yes	FALSE	1
uc011agc.1	chr21:48055527..48084862,+	BRCA_ctrl	BRCA_cancer	PRMT2	51.1014	42.3877	-0.321099	4.30278e-12	0.915257	2.83091	1.62674	2.80565e-24	0.018	0.062	0.045	1	4.34457e-17	FALSE	0.996769	TRUE	no	yes	FALSE	0
uc002zmd.2	chr22:17618411..17646177,-	BRCA_ctrl	BRCA_cancer	CECR5	14.6488	18.9998	0.370621	3.66882e-08	1.20014	1.12754	-0.0902595	0.667354	0.082	0.064	-0.018	1	0.00255428	FALSE	0.997147	TRUE	no	no	NA	0
uc002zme.2	chr22:17618411..17646177,-	BRCA_ctrl	BRCA_cancer	CECR5	14.6488	18.9998	0.370621	3.66882e-08	2.93171	4.92407	0.748032	4.32593e-09	0.192	0.25	0.058	1	0.00255428	FALSE	0.994812	TRUE	no	no	NA	0
uc002zmf.2	chr22:17618411..17646177,-	BRCA_ctrl	BRCA_cancer	CECR5	14.6488	18.9998	0.370621	3.66882e-08	7.18069	11.0326	0.619462	1.95003e-05	0.456	0.555	0.099	1	0.00255428	FALSE	0.999993	TRUE	yes	yes	NA	0
uc002zmh.2	chr22:17618411..17646177,-	BRCA_ctrl	BRCA_cancer	CECR5	14.6488	18.9998	0.370621	3.66882e-08	3.32119	1.85728	-0.838162	0.107978	0.268	0.128	-0.141	0.00255428	0.00255428	FALSE	0.999987	TRUE	no	yes	NA	0
uc002znd.1	chr22:18216906..18257431,-	BRCA_ctrl	BRCA_cancer	BID	9.06983	11.3747	0.3589	2.325e-07	1.45991	5.94184	2.02428	5.06293e-10	0.15	0.468	0.318	1.09432e-06	1.09432e-06	FALSE	0.995408	TRUE	no	yes	FALSE	0
uc010grb.1	chr22:18216906..18257431,-	BRCA_ctrl	BRCA_cancer	BID	9.06983	11.3747	0.3589	2.325e-07	6.50328	4.19093	-0.633781	0.0443729	0.73	0.427	-0.303	0.000674702	1.09432e-06	FALSE	0.995431	TRUE	no	yes	FALSE	0
uc002zwv.1	chr22:23487513..23506531,+	BRCA_ctrl	BRCA_cancer	RAB36	2.60788	3.70478	0.505154	0.000347461	2.40578	3.22996	0.424923	0.0983843	0.883	0.741	-0.142	0.011729	0.011729	FALSE	0.999872	TRUE	no	yes	NA	0
uc002zyo.3	chr22:24199059..24227723,+	BRCA_ctrl	BRCA_cancer	SLC2A11	4.28569	3.86297	-0.236767	0.000300258	1.10933	1.24529	0.165939	0.156079	0.247	0.316	0.069	1	2.24023e-12	NA	0.99273	TRUE	NA	NA	NA	0
uc002zyp.3	chr22:24199059..24227723,+	BRCA_ctrl	BRCA_cancer	SLC2A11	4.28569	3.86297	-0.236767	0.000300258	1.9066	0.789414	-1.27103	1.9485e-12	0.46	0.213	-0.247	2.24023e-12	2.24023e-12	FALSE	0.999999	TRUE	no	yes	NA	0
uc003adr.1	chr22:29083731..29137822,-	BRCA_ctrl	BRCA_cancer	CHEK2	3.83192	6.93489	0.895941	1.41278e-26	1.044	1.00377	-0.0572886	0.834149	0.276	0.169	-0.108	1.02169e-06	9.6337e-11	NA	0.977502	TRUE	NA	NA	TRUE	0
uc003adu.1	chr22:29083731..29137822,-	BRCA_ctrl	BRCA_cancer	CHEK2	3.83192	6.93489	0.895941	1.41278e-26	0.904752	3.12101	1.78434	1.92376e-15	0.221	0.41	0.189	9.6337e-11	9.6337e-11	FALSE	0.999998	TRUE	no	yes	TRUE	0
uc010gvk.1	chr22:29083731..29137822,-	BRCA_ctrl	BRCA_cancer	CHEK2	3.83192	6.93489	0.895941	1.41278e-26	0.95469	1.43135	0.582925	2.09928e-05	0.243	0.23	-0.013	1	9.6337e-11	NA	0.989317	TRUE	NA	NA	TRUE	0
uc003afi.2	chr22:29723671..29784569,-	BRCA_ctrl	BRCA_cancer	AP1B1	29.7661	38.6424	0.301333	3.28438e-08	11.1482	13.3522	0.260278	0.00301102	0.381	0.354	-0.028	1	5.23284e-10	FALSE	1	TRUE	no	yes	TRUE	0
uc003afk.2	chr22:29723671..29784569,-	BRCA_ctrl	BRCA_cancer	AP1B1	29.7661	38.6424	0.301333	3.28438e-08	10.7026	8.09228	-0.403291	0.0242659	0.371	0.217	-0.153	5.23284e-10	5.23284e-10	FALSE	1	TRUE	no	yes	TRUE	0
uc003afl.2	chr22:29723671..29784569,-	BRCA_ctrl	BRCA_cancer	AP1B1	29.7661	38.6424	0.301333	3.28438e-08	5.74856	8.4374	0.553513	2.53363e-06	0.186	0.216	0.031	1	5.23284e-10	FALSE	1	TRUE	no	yes	TRUE	0
uc011ako.1	chr22:29723671..29784569,-	BRCA_ctrl	BRCA_cancer	AP1B1	29.7661	38.6424	0.301333	3.28438e-08	1.70196	8.20314	2.26843	1.41358e-07	0.046	0.198	0.152	1	5.23284e-10	FALSE	1	TRUE	no	yes	TRUE	0
uc003afq.2	chr22:29904157..29949736,-	BRCA_ctrl	BRCA_cancer	THOC5	13.1038	11.4515	-0.143289	0.019039	1.26235	1.73761	0.460345	0.125034	0.096	0.136	0.04	1	1.84063e-09	FALSE	0.999921	TRUE	no	yes	FALSE	0
uc003aft.2	chr22:29904157..29949736,-	BRCA_ctrl	BRCA_cancer	THOC5	13.1038	11.4515	-0.143289	0.019039	2.13809	3.2324	0.595921	1.61464e-05	0.174	0.304	0.129	1.84063e-09	1.84063e-09	FALSE	1	TRUE	no	yes	FALSE	0
uc003afu.2	chr22:29904157..29949736,-	BRCA_ctrl	BRCA_cancer	THOC5	13.1038	11.4515	-0.143289	0.019039	7.17201	4.50226	-0.671428	9.60873e-13	0.539	0.404	-0.135	3.36607e-07	1.84063e-09	FALSE	1	TRUE	no	yes	FALSE	0
uc003afv.1	chr22:29904157..29949736,-	BRCA_ctrl	BRCA_cancer	THOC5	13.1038	11.4515	-0.143289	0.019039	1.78554	0.61891	-1.52419	2.44109e-18	0.132	0.05	-0.082	1	1.84063e-09	FALSE	0.999834	TRUE	no	yes	FALSE	0
uc003agu.3	chr22:30279158..30426855,+	BRCA_ctrl	BRCA_cancer	MTMR3	11.3107	7.59866	-0.573435	6.07215e-30	2.05436	0.356234	-2.5267	2.9188e-40	0.174	0.046	-0.128	2.9039e-16	2.9039e-16	FALSE	1	TRUE	no	yes	NA	0
uc003agv.3	chr22:30279158..30426855,+	BRCA_ctrl	BRCA_cancer	MTMR3	11.3107	7.59866	-0.573435	6.07215e-30	8.48206	6.091	-0.477665	6.31597e-17	0.753	0.797	0.044	1	2.9039e-16	FALSE	1	TRUE	no	yes	NA	0
uc003agw.3	chr22:30279158..30426855,+	BRCA_ctrl	BRCA_cancer	MTMR3	11.3107	7.59866	-0.573435	6.07215e-30	0.774265	1.15143	0.572193	9.46293e-05	0.072	0.157	0.084	1	2.9039e-16	FALSE	1	TRUE	no	yes	NA	0
uc003als.2	chr22:32149965..32303000,+	BRCA_ctrl	BRCA_cancer	DEPDC5	3.52823	4.03336	0.0337241	0.596973	1.75793	1.29081	-0.445348	0.000438878	0.504	0.32	-0.185	9.01805e-08	9.01805e-08	FALSE	1	TRUE	no	yes	NA	0
uc003amc.2	chr22:32439037..32509009,+	BRCA_ctrl	BRCA_cancer	SLC5A1	7.1427	3.30816	-1.11665	1.43844e-07	6.79807	2.89548	-1.23121	6.93354e-06	0.843	0.683	-0.16	0.0303331	0.0303331	FALSE	1	TRUE	no	yes	NA	0
uc003apm.3	chr22:36883234..36903148,-	BRCA_ctrl	BRCA_cancer	FOXRED2	5.93122	10.4839	0.803522	5.81842e-22	2.0978	4.2866	1.03053	1.49405e-20	0.364	0.415	0.05	1	0.000921096	FALSE	0.997143	TRUE	no	no	NA	0
uc003apn.3	chr22:36883234..36903148,-	BRCA_ctrl	BRCA_cancer	FOXRED2	5.93122	10.4839	0.803522	5.81842e-22	1.73865	3.86712	1.15316	6.50767e-05	0.279	0.363	0.084	1	0.000921096	FALSE	1	TRUE	yes	yes	NA	0
uc003app.3	chr22:36883234..36903148,-	BRCA_ctrl	BRCA_cancer	FOXRED2	5.93122	10.4839	0.803522	5.81842e-22	2.04136	2.15237	0.0763713	0.861405	0.347	0.203	-0.144	0.000921096	0.000921096	FALSE	1	TRUE	yes	yes	NA	0
uc010gxc.2	chr22:37447779..37459429,+	BRCA_ctrl	BRCA_cancer	KCTD17	3.58779	5.71714	0.667876	2.41918e-15	1.40505	1.39126	-0.0140703	0.983101	0.452	0.285	-0.166	0.00359188	0.00359188	FALSE	0.999479	TRUE	no	yes	TRUE	0
uc011amv.1	chr22:37447779..37459429,+	BRCA_ctrl	BRCA_cancer	KCTD17	3.58779	5.71714	0.667876	2.41918e-15	1.85262	3.38118	0.867152	5.9031e-08	0.457	0.558	0.101	1	0.00359188	FALSE	0.999923	TRUE	no	yes	TRUE	0
uc003aqy.1	chr22:37576206..37594341,-	BRCA_ctrl	BRCA_cancer	C1QTNF6	3.30753	16.3643	2.20876	6.35501e-84	2.57974	14.5794	2.49825	2.09249e-91	0.761	0.886	0.125	1.11066e-16	1.11066e-16	FALSE	0.999517	TRUE	no	yes	NA	1
uc003aun.1	chr22:38368319..38383429,-	BRCA_ctrl	BRCA_cancer	SOX10	33.4318	10.7486	-1.63818	4.57132e-11	30.2283	8.66643	-1.8023	1.87224e-05	0.806	0.46	-0.345	1.23865e-06	8.01602e-07	FALSE	0.999999	TRUE	no	yes	FALSE	0
uc003auo.1	chr22:38368319..38383429,-	BRCA_ctrl	BRCA_cancer	SOX10	33.4318	10.7486	-1.63818	4.57132e-11	3.14104	2.05578	-0.611475	0.167565	0.189	0.52	0.331	8.01602e-07	8.01602e-07	FALSE	0.999999	TRUE	no	yes	FALSE	0
uc003avb.2	chr22:38507502..38577836,-	BRCA_ctrl	BRCA_cancer	PLA2G6	5.97902	4.75503	-0.359584	2.21573e-05	2.49844	1.47682	-0.758192	3.01603e-07	0.412	0.303	-0.109	2.10693e-05	2.10693e-05	FALSE	1	TRUE	no	yes	NA	0
uc011ano.1	chr22:38507502..38577836,-	BRCA_ctrl	BRCA_cancer	PLA2G6	5.97902	4.75503	-0.359584	2.21573e-05	1.01327	0.558094	-0.857903	2.99761e-12	0.163	0.116	-0.047	1	2.10693e-05	FALSE	0.999992	TRUE	no	yes	NA	0
uc003awo.1	chr22:39378405..39388783,+	BRCA_ctrl	BRCA_cancer	APOBEC3B	1.7166	10.1113	2.56354	1.99066e-39	1.58998	10.0228	2.65488	3.68669e-35	0.833	0.947	0.114	8.16078e-06	8.16078e-06	FALSE	0.999922	TRUE	no	yes	NA	NA
uc003azf.1	chr22:41253094..41363888,+	BRCA_ctrl	BRCA_cancer	XPNPEP3	5.84162	5.24662	0.0291819	0.735882	2.02112	1.00574	-1.00542	1.05182e-06	0.294	0.175	-0.118	1.0137e-10	5.92759e-13	NA	0.0482047	FALSE	NA	NA	TRUE	0
uc003azg.1	chr22:41253094..41363888,+	BRCA_ctrl	BRCA_cancer	XPNPEP3	5.84162	5.24662	0.0291819	0.735882	1.17178	0.869892	-0.430562	1.69917e-06	0.222	0.174	-0.048	1	5.92759e-13	NA	0.0018589	FALSE	NA	NA	TRUE	0
uc003azh.2	chr22:41253094..41363888,+	BRCA_ctrl	BRCA_cancer	XPNPEP3	5.84162	5.24662	0.0291819	0.735882	1.33458	2.05897	0.626168	2.21692e-10	0.24	0.392	0.152	5.92759e-13	5.92759e-13	FALSE	0.999997	TRUE	no	yes	TRUE	0
uc003azx.2	chr22:41763392..41795328,+	BRCA_ctrl	BRCA_cancer	TEF	18.0194	6.48201	-1.47312	1.48745e-112	9.96884	2.44248	-2.02888	6.00431e-41	0.545	0.397	-0.149	2.4087e-05	1.61421e-05	FALSE	0.999792	TRUE	no	yes	FALSE	0
uc003azy.2	chr22:41763392..41795328,+	BRCA_ctrl	BRCA_cancer	TEF	18.0194	6.48201	-1.47312	1.48745e-112	7.74182	3.94235	-0.973492	5.17118e-10	0.437	0.588	0.151	1.61421e-05	1.61421e-05	FALSE	0.999885	TRUE	no	yes	FALSE	0
uc003bbn.2	chr22:42334749..42343148,-	BRCA_ctrl	BRCA_cancer	CENPM	1.32215	9.56683	2.8541	3.64293e-96	1.01231	7.48869	2.88399	3.04752e-88	0.671	0.791	0.121	0.000977583	0.000977583	FALSE	0.992672	TRUE	no	yes	NA	0
uc003bcj.1	chr22:42556019..42611445,-	BRCA_ctrl	BRCA_cancer	TCF20	8.26254	8.71982	0.0810281	0.259118	3.78019	3.06291	-0.303525	0.00121361	0.459	0.35	-0.109	4.47954e-12	1.33791e-14	FALSE	1	TRUE	no	yes	FALSE	0
uc003bck.1	chr22:42556019..42611445,-	BRCA_ctrl	BRCA_cancer	TCF20	8.26254	8.71982	0.0810281	0.259118	4.07779	5.4283	0.412597	1.59149e-08	0.494	0.628	0.134	1.33791e-14	1.33791e-14	FALSE	1	TRUE	no	yes	FALSE	0
uc003bct.2	chr22:42951347..42978017,-	BRCA_ctrl	BRCA_cancer	RRP7B	3.00243	2.45689	-0.283071	0.00471387	2.26896	2.16749	-0.0665825	0.610664	0.742	0.875	0.133	3.20691e-10	3.20691e-10	NA	0.453359	TRUE	NA	NA	NA	NA
uc003bde.3	chr22:43266939..43411151,-	BRCA_ctrl	BRCA_cancer	PACSIN2	29.3912	23.9882	-0.299055	7.5765e-05	1.51963	0.620751	-1.29019	0.00404607	0.062	0.033	-0.029	1	2.64772e-13	FALSE	1	TRUE	no	yes	FALSE	0
uc003bdf.3	chr22:43266939..43411151,-	BRCA_ctrl	BRCA_cancer	PACSIN2	29.3912	23.9882	-0.299055	7.5765e-05	1.14983	1.83084	0.670153	0.000220265	0.036	0.078	0.042	1	2.64772e-13	FALSE	0.999999	TRUE	no	yes	FALSE	0
uc003bdg.3	chr22:43266939..43411151,-	BRCA_ctrl	BRCA_cancer	PACSIN2	29.3912	23.9882	-0.299055	7.5765e-05	21.6392	20.7057	-0.0635986	0.583083	0.755	0.864	0.109	4.90706e-12	2.64772e-13	FALSE	1	TRUE	no	yes	FALSE	0
uc010gzg.2	chr22:43266939..43411151,-	BRCA_ctrl	BRCA_cancer	PACSIN2	29.3912	23.9882	-0.299055	7.5765e-05	5.0826	0.830904	-2.61121	4.36902e-18	0.147	0.026	-0.121	2.64772e-13	2.64772e-13	FALSE	1	TRUE	no	yes	FALSE	0
uc003bfi.2	chr22:45148438..45258662,+	BRCA_ctrl	BRCA_cancer	ARHGAP8	8.23581	15.4709	0.861739	3.13041e-20	1.09637	1.21815	0.151421	0.293045	0.138	0.089	-0.05	1	0.000144515	FALSE	0.999869	TRUE	no	yes	NA	0
uc003bfj.2	chr22:45148438..45258662,+	BRCA_ctrl	BRCA_cancer	ARHGAP8	8.23581	15.4709	0.861739	3.13041e-20	0.451168	1.64783	1.86259	1.89435e-30	0.045	0.103	0.058	1	0.000144515	FALSE	0.999999	TRUE	no	yes	NA	0
uc003bfk.2	chr22:45148438..45258662,+	BRCA_ctrl	BRCA_cancer	ARHGAP8	8.23581	15.4709	0.861739	3.13041e-20	4.0815	8.51386	1.06007	6.01716e-16	0.449	0.547	0.098	1	0.000144515	FALSE	0.999998	TRUE	no	yes	NA	0
uc003bfl.2	chr22:45148438..45258662,+	BRCA_ctrl	BRCA_cancer	ARHGAP8	8.23581	15.4709	0.861739	3.13041e-20	2.53204	3.85032	0.603903	0.000693904	0.357	0.245	-0.111	0.000144515	0.000144515	NA	0.763204	TRUE	NA	NA	NA	0
uc003bfv.1	chr22:45588123..45636650,-	BRCA_ctrl	BRCA_cancer	C22orf9	15.0946	17.1221	0.178196	0.000495516	4.42792	3.75616	-0.237389	0.0311588	0.282	0.218	-0.063	1	1.16161e-05	FALSE	0.999997	TRUE	no	yes	NA	1
uc003bfw.1	chr22:45588123..45636650,-	BRCA_ctrl	BRCA_cancer	C22orf9	15.0946	17.1221	0.178196	0.000495516	2.01592	1.3586	-0.569215	0.000572919	0.13	0.079	-0.052	1	1.16161e-05	FALSE	0.999997	TRUE	no	yes	NA	0
uc003bfx.1	chr22:45588123..45636650,-	BRCA_ctrl	BRCA_cancer	C22orf9	15.0946	17.1221	0.178196	0.000495516	8.52712	11.8303	0.472323	8.92341e-11	0.577	0.694	0.117	1.16161e-05	1.16161e-05	FALSE	0.999996	TRUE	no	yes	NA	0
uc003bhp.2	chr22:46731298..46753236,+	BRCA_ctrl	BRCA_cancer	TRMU	4.97739	6.57577	0.426412	3.02751e-08	1.53436	3.21358	1.06615	5.96897e-19	0.307	0.489	0.182	3.41351e-13	3.41351e-13	FALSE	0.999986	TRUE	no	yes	NA	0
uc003bjq.1	chr22:50624354..50638027,+	BRCA_ctrl	BRCA_cancer	TRABD	9.2979	18.202	0.986142	4.14231e-31	2.00996	7.67702	1.9328	1.29804e-05	0.162	0.361	0.199	0.017407	1.31785e-05	FALSE	0.999995	TRUE	no	yes	FALSE	1
uc003bju.1	chr22:50624354..50638027,+	BRCA_ctrl	BRCA_cancer	TRABD	9.2979	18.202	0.986142	4.14231e-31	1.83524	4.16178	1.1808	4.13761e-05	0.183	0.24	0.057	1	1.31785e-05	FALSE	0.999995	TRUE	no	yes	FALSE	1
uc003bjv.2	chr22:50624354..50638027,+	BRCA_ctrl	BRCA_cancer	TRABD	9.2979	18.202	0.986142	4.14231e-31	2.30941	4.07084	0.817316	2.71703e-08	0.241	0.24	-0.001	1	1.31785e-05	FALSE	0.999996	TRUE	no	yes	FALSE	0
uc003bjw.1	chr22:50624354..50638027,+	BRCA_ctrl	BRCA_cancer	TRABD	9.2979	18.202	0.986142	4.14231e-31	2.99847	1.80547	-0.731598	0.286385	0.394	0.135	-0.258	1.31785e-05	1.31785e-05	FALSE	0.999995	TRUE	no	yes	FALSE	1
uc003bmb.3	chr22:50964184..50968514,-	BRCA_ctrl	BRCA_cancer	TYMP	18.0465	63.4422	1.85874	2.92926e-47	5.14713	12.6089	1.29241	2.44492e-23	0.301	0.22	-0.081	1	1.48906e-09	FALSE	1	TRUE	no	yes	NA	0
uc003bmc.3	chr22:50964184..50968514,-	BRCA_ctrl	BRCA_cancer	TYMP	18.0465	63.4422	1.85874	2.92926e-47	4.45127	25.7049	2.52942	4.43879e-28	0.203	0.36	0.157	1.48906e-09	1.48906e-09	FALSE	1	TRUE	no	yes	NA	0
uc003bmd.3	chr22:50964184..50968514,-	BRCA_ctrl	BRCA_cancer	TYMP	18.0465	63.4422	1.85874	2.92926e-47	2.35494	9.4306	2.00109	1.47042e-19	0.123	0.144	0.021	1	1.48906e-09	FALSE	1	TRUE	no	yes	NA	0
uc011arz.1	chr22:50964184..50968514,-	BRCA_ctrl	BRCA_cancer	TYMP	18.0465	63.4422	1.85874	2.92926e-47	5.6335	13.6358	1.27504	5.12387e-28	0.347	0.249	-0.098	1	1.48906e-09	FALSE	0.999026	TRUE	no	yes	NA	1
uc003bmp.2	chr22:51007291..51021428,-	BRCA_ctrl	BRCA_cancer	CHKB-CPT1B	7.83952	6.75192	-0.168969	0.0818079	1.53632	2.01407	0.390104	0.00113712	0.19	0.305	0.115	3.78727e-11	2.71317e-11	FALSE	1	TRUE	no	yes	TRUE	0
uc003bmu.2	chr22:51007291..51021428,-	BRCA_ctrl	BRCA_cancer	CHKB-CPT1B	7.83952	6.75192	-0.168969	0.0818079	5.4307	3.72837	-0.542656	7.25545e-09	0.694	0.554	-0.14	2.71317e-11	2.71317e-11	FALSE	0.998727	TRUE	no	yes	TRUE	0
uc003duj.2	chr3:100468181..100712334,-	BRCA_ctrl	BRCA_cancer	ABI3BP	27.6882	6.06996	-2.26349	8.36405e-71	5.8695	1.28369	-2.19235	4.64458e-23	0.225	0.149	-0.075	1	6.26155e-17	FALSE	1	TRUE	no	yes	TRUE	0
uc003duk.2	chr3:100468181..100712334,-	BRCA_ctrl	BRCA_cancer	ABI3BP	27.6882	6.06996	-2.26349	8.36405e-71	1.61013	0.585302	-1.45882	6.63055e-16	0.055	0.099	0.044	1	6.26155e-17	FALSE	1	TRUE	no	yes	TRUE	0
uc003dul.2	chr3:100468181..100712334,-	BRCA_ctrl	BRCA_cancer	ABI3BP	27.6882	6.06996	-2.26349	8.36405e-71	2.54516	0.392446	-2.69537	2.3681e-29	0.083	0.042	-0.041	1	6.26155e-17	FALSE	1	TRUE	no	yes	TRUE	0
uc003dum.2	chr3:100468181..100712334,-	BRCA_ctrl	BRCA_cancer	ABI3BP	27.6882	6.06996	-2.26349	8.36405e-71	2.14024	1.1498	-0.896331	2.81378e-10	0.122	0.351	0.229	1.1397e-08	6.26155e-17	FALSE	0.99997	TRUE	no	yes	TRUE	0
uc003dun.2	chr3:100468181..100712334,-	BRCA_ctrl	BRCA_cancer	ABI3BP	27.6882	6.06996	-2.26349	8.36405e-71	4.90277	1.33734	-1.87378	2.92442e-30	0.189	0.218	0.029	1	6.26155e-17	FALSE	1	TRUE	yes	yes	TRUE	0
uc003duo.2	chr3:100468181..100712334,-	BRCA_ctrl	BRCA_cancer	ABI3BP	27.6882	6.06996	-2.26349	8.36405e-71	4.25224	0.852848	-2.31696	6.22192e-35	0.126	0.097	-0.029	1	6.26155e-17	FALSE	1	TRUE	yes	no	TRUE	0
uc011bhd.1	chr3:100468181..100712334,-	BRCA_ctrl	BRCA_cancer	ABI3BP	27.6882	6.06996	-2.26349	8.36405e-71	6.34873	0.459039	-3.7883	2.30102e-51	0.198	0.041	-0.157	6.26155e-17	6.26155e-17	FALSE	1	TRUE	no	yes	TRUE	0
uc003dva.2	chr3:101293042..101313279,+	BRCA_ctrl	BRCA_cancer	PCNP	63.9643	50.7611	-0.327606	9.30106e-17	34.217	33.5921	-0.0265738	0.676371	0.542	0.66	0.117	8.56644e-16	8.56644e-16	FALSE	0.925608	TRUE	no	yes	TRUE	0
uc003dvb.2	chr3:101293042..101313279,+	BRCA_ctrl	BRCA_cancer	PCNP	63.9643	50.7611	-0.327606	9.30106e-17	24.431	13.5349	-0.851965	5.46434e-15	0.379	0.266	-0.113	5.1623e-15	8.56644e-16	NA	0.199862	FALSE	NA	NA	TRUE	0
uc003dvc.2	chr3:101293042..101313279,+	BRCA_ctrl	BRCA_cancer	PCNP	63.9643	50.7611	-0.327606	9.30106e-17	4.38358	2.71292	-0.69244	5.1027e-21	0.064	0.056	-0.008	1	8.56644e-16	NA	0.0380873	FALSE	NA	NA	TRUE	0
uc003dvx.2	chr3:105085713..105295743,+	BRCA_ctrl	BRCA_cancer	ALCAM	41.2964	60.0617	0.48951	0.000163357	16.045	14.0644	-0.190076	0.622721	0.354	0.204	-0.15	5.77957e-06	5.77957e-06	FALSE	0.999999	TRUE	yes	yes	TRUE	0
uc003dvy.2	chr3:105085713..105295743,+	BRCA_ctrl	BRCA_cancer	ALCAM	41.2964	60.0617	0.48951	0.000163357	6.03604	11.196	0.891205	1.12334e-06	0.149	0.18	0.031	1	5.77957e-06	FALSE	0.999998	TRUE	yes	yes	TRUE	0
uc010hpp.2	chr3:105085713..105295743,+	BRCA_ctrl	BRCA_cancer	ALCAM	41.2964	60.0617	0.48951	0.000163357	17.7312	32.605	0.878726	2.23534e-11	0.453	0.58	0.127	1	5.77957e-06	FALSE	0.994934	TRUE	no	yes	TRUE	0
uc011bhh.1	chr3:105085713..105295743,+	BRCA_ctrl	BRCA_cancer	ALCAM	41.2964	60.0617	0.48951	0.000163357	1.07281	1.31412	0.292136	0.545663	0.033	0.021	-0.012	1	5.77957e-06	FALSE	0.98953	TRUE	no	yes	TRUE	0
uc003dwt.1	chr3:107761941..107809935,-	BRCA_ctrl	BRCA_cancer	CD47	29.2814	21.8514	-0.419604	2.04562e-09	1.55288	4.35769	1.48809	6.74097e-23	0.052	0.212	0.16	2.75415e-15	7.37763e-17	FALSE	0.991623	TRUE	yes	yes	FALSE	0
uc003dwu.1	chr3:107761941..107809935,-	BRCA_ctrl	BRCA_cancer	CD47	29.2814	21.8514	-0.419604	2.04562e-09	2.87022	3.87609	0.433237	0.000448093	0.095	0.182	0.086	1	7.37763e-17	FALSE	0.987631	TRUE	yes	yes	FALSE	0
uc003dwv.1	chr3:107761941..107809935,-	BRCA_ctrl	BRCA_cancer	CD47	29.2814	21.8514	-0.419604	2.04562e-09	22.4736	11.3509	-0.985408	2.87946e-32	0.771	0.509	-0.262	7.37763e-17	7.37763e-17	FALSE	0.983999	TRUE	yes	yes	FALSE	0
uc003dww.1	chr3:107761941..107809935,-	BRCA_ctrl	BRCA_cancer	CD47	29.2814	21.8514	-0.419604	2.04562e-09	2.38471	2.26676	-0.0732514	0.651028	0.082	0.098	0.016	1	7.37763e-17	FALSE	0.979557	TRUE	yes	yes	FALSE	0
uc010hds.2	chr3:11178779..11304938,+	BRCA_ctrl	BRCA_cancer	HRH1	3.27715	1.92778	-0.760369	7.44656e-17	3.15188	1.46916	-1.10107	1.39404e-21	0.965	0.808	-0.156	1.05038e-07	1.05038e-07	FALSE	0.999999	TRUE	no	yes	NA	0
uc003dyx.2	chr3:112051916..112081656,+	BRCA_ctrl	BRCA_cancer	CD200	14.5353	5.64286	-1.37109	5.43636e-75	6.48087	2.16654	-1.58028	2.62524e-31	0.449	0.363	-0.086	1	3.847e-07	FALSE	0.997092	TRUE	yes	yes	NA	0
uc003dyy.2	chr3:112051916..112081656,+	BRCA_ctrl	BRCA_cancer	CD200	14.5353	5.64286	-1.37109	5.43636e-75	1.97382	0.657638	-1.58428	1.59199e-07	0.133	0.128	-0.005	1	3.847e-07	FALSE	0.554484	TRUE	no	yes	NA	0
uc003dyz.2	chr3:112051916..112081656,+	BRCA_ctrl	BRCA_cancer	CD200	14.5353	5.64286	-1.37109	5.43636e-75	5.41971	2.68195	-1.01476	3.14904e-15	0.377	0.488	0.112	3.847e-07	3.847e-07	FALSE	0.960266	TRUE	no	yes	NA	0
uc003bwr.2	chr3:12329349..12475854,+	BRCA_ctrl	BRCA_cancer	PPARG	57.2083	4.99277	-3.51509	1.42195993521385e-315	7.55335	1.12112	-2.75088	6.10115e-20	0.147	0.191	0.043	1	5.07735e-06	FALSE	0.999997	TRUE	no	yes	FALSE	0
uc003bws.2	chr3:12329349..12475854,+	BRCA_ctrl	BRCA_cancer	PPARG	57.2083	4.99277	-3.51509	1.42195993521385e-315	8.98852	1.19561	-2.90917	4.61587e-25	0.116	0.373	0.258	0.0376515	5.07735e-06	FALSE	0.999997	TRUE	no	yes	FALSE	0
uc003bwu.2	chr3:12329349..12475854,+	BRCA_ctrl	BRCA_cancer	PPARG	57.2083	4.99277	-3.51509	1.42195993521385e-315	10.4641	0.682766	-3.93567	8.29354e-30	0.216	0.079	-0.138	5.07735e-06	5.07735e-06	FALSE	0.999997	TRUE	no	yes	FALSE	0
uc003bwv.2	chr3:12329349..12475854,+	BRCA_ctrl	BRCA_cancer	PPARG	57.2083	4.99277	-3.51509	1.42195993521385e-315	1.75609	0.176912	-3.29913	6.81949e-58	0.031	0.037	0.006	1	5.07735e-06	FALSE	0.985599	TRUE	no	yes	FALSE	0
uc003bwx.2	chr3:12329349..12475854,+	BRCA_ctrl	BRCA_cancer	PPARG	57.2083	4.99277	-3.51509	1.42195993521385e-315	27.1163	1.67775	-4.0136	6.51353e-67	0.467	0.289	-0.178	1	5.07735e-06	FALSE	0.999999	TRUE	no	yes	FALSE	0
uc003egl.2	chr3:123331145..123603149,-	BRCA_ctrl	BRCA_cancer	MYLK	178.548	33.4856	-2.31856	1.73532e-140	107.666	16.7043	-2.68822	1.58669e-98	0.553	0.411	-0.143	1.49593e-11	1.49593e-11	FALSE	0.86296	TRUE	no	yes	TRUE	0
uc003egm.2	chr3:123331145..123603149,-	BRCA_ctrl	BRCA_cancer	MYLK	178.548	33.4856	-2.31856	1.73532e-140	20.701	3.55001	-2.54354	3.70374e-48	0.106	0.095	-0.011	1	1.49593e-11	FALSE	0.864467	TRUE	no	yes	TRUE	0
uc003egp.2	chr3:123331145..123603149,-	BRCA_ctrl	BRCA_cancer	MYLK	178.548	33.4856	-2.31856	1.73532e-140	4.41558	1.19377	-1.88681	8.56149e-26	0.028	0.04	0.012	1	1.49593e-11	FALSE	1	TRUE	no	yes	TRUE	0
uc011bjv.1	chr3:123331145..123603149,-	BRCA_ctrl	BRCA_cancer	MYLK	178.548	33.4856	-2.31856	1.73532e-140	34.7958	9.06039	-1.94119	9.31365e-89	0.236	0.342	0.105	3.58607e-11	1.49593e-11	FALSE	1	TRUE	no	yes	TRUE	0
uc011bjw.1	chr3:123331145..123603149,-	BRCA_ctrl	BRCA_cancer	MYLK	178.548	33.4856	-2.31856	1.73532e-140	9.14773	2.08897	-2.13045	9.90976e-59	0.064	0.073	0.008	1	1.49593e-11	FALSE	1	TRUE	no	yes	TRUE	0
uc003eha.2	chr3:123687881..123710984,-	BRCA_ctrl	BRCA_cancer	ROPN1	6.42776	3.74441	-0.602794	0.0608566	6.2573	2.96982	-1.07477	0.00113221	0.916	0.736	-0.179	8.89536e-05	8.89536e-05	FALSE	0.987701	TRUE	no	no	NA	NA
uc003ehu.3	chr3:124801482..124998091,-	BRCA_ctrl	BRCA_cancer	SLC12A8	2.5228	7.30237	1.47272	8.1228e-59	0.599929	3.02888	2.33384	1.35117e-51	0.277	0.443	0.166	2.31964e-05	2.31964e-05	FALSE	0.999996	TRUE	no	yes	NA	0
uc003ehv.3	chr3:124801482..124998091,-	BRCA_ctrl	BRCA_cancer	SLC12A8	2.5228	7.30237	1.47272	8.1228e-59	1.51794	3.47678	1.19509	8.02849e-13	0.531	0.452	-0.078	1	2.31964e-05	FALSE	1	TRUE	no	yes	NA	0
uc003eih.2	chr3:125688028..125702294,+	BRCA_ctrl	BRCA_cancer	ROPN1B	8.03078	4.48025	-0.756814	0.00758071	5.72776	1.33416	-2.10049	2.27964e-13	0.703	0.468	-0.235	8.53994e-07	8.53994e-07	FALSE	0.986274	TRUE	no	no	NA	0
uc010hsb.2	chr3:125688028..125702294,+	BRCA_ctrl	BRCA_cancer	ROPN1B	8.03078	4.48025	-0.756814	0.00758071	1.00881	2.18977	1.11646	0.292706	0.098	0.104	0.006	1	8.53994e-07	FALSE	0.986236	TRUE	no	no	NA	0
uc003emn.2	chr3:129158968..129239190,+	BRCA_ctrl	BRCA_cancer	IFT122	13.6604	20.9109	0.3949	3.22876e-08	6.95976	6.49189	-0.100348	0.358961	0.525	0.364	-0.161	6.45337e-11	6.45337e-11	FALSE	1	TRUE	no	yes	TRUE	0
uc003emo.2	chr3:129158968..129239190,+	BRCA_ctrl	BRCA_cancer	IFT122	13.6604	20.9109	0.3949	3.22876e-08	1.21428	1.10589	-0.134623	0.492872	0.092	0.066	-0.026	1	6.45337e-11	FALSE	1	TRUE	no	yes	TRUE	0
uc003ems.2	chr3:129158968..129239190,+	BRCA_ctrl	BRCA_cancer	IFT122	13.6604	20.9109	0.3949	3.22876e-08	4.2588	11.6903	1.45646	2.15998e-26	0.293	0.483	0.19	3.9559e-10	6.45337e-11	FALSE	1	TRUE	no	no	TRUE	0
uc011ava.1	chr3:13573824..13679921,+	BRCA_ctrl	BRCA_cancer	FBLN2	91.8162	35.7718	-1.38944	9.33334e-39	72.2959	5.97763	-3.59614	1.35067e-193	0.728	0.162	-0.566	4.34457e-17	4.34457e-17	FALSE	1	TRUE	yes	yes	TRUE	0
uc011avb.1	chr3:13573824..13679921,+	BRCA_ctrl	BRCA_cancer	FBLN2	91.8162	35.7718	-1.38944	9.33334e-39	19.3168	29.6814	0.619739	3.29864e-06	0.27	0.835	0.565	4.34457e-17	4.34457e-17	FALSE	1	TRUE	yes	yes	TRUE	0
uc003ewx.3	chr3:148880570..148939832,-	BRCA_ctrl	BRCA_cancer	CP	17.5176	26.6494	0.550749	0.0581191	2.40186	6.76186	1.49299	0.000152982	0.127	0.228	0.101	1	3.00171e-05	FALSE	1	TRUE	no	yes	TRUE	0
uc003ewy.3	chr3:148880570..148939832,-	BRCA_ctrl	BRCA_cancer	CP	17.5176	26.6494	0.550749	0.0581191	12.4676	15.3114	0.296409	0.439811	0.634	0.465	-0.169	3.00171e-05	3.00171e-05	FALSE	1	TRUE	yes	yes	TRUE	0
uc003ewz.2	chr3:148880570..148939832,-	BRCA_ctrl	BRCA_cancer	CP	17.5176	26.6494	0.550749	0.0581191	0.901796	1.02701	0.187473	0.696282	0.13	0.135	0.006	1	3.00171e-05	FALSE	1	TRUE	yes	yes	TRUE	0
uc011bnr.1	chr3:148880570..148939832,-	BRCA_ctrl	BRCA_cancer	CP	17.5176	26.6494	0.550749	0.0581191	0.748053	1.18868	0.667678	0.0592768	0.062	0.075	0.013	1	3.00171e-05	NA	1	TRUE	NA	NA	TRUE	0
uc003exs.1	chr3:149682691..149688741,-	BRCA_ctrl	BRCA_cancer	PFN2	40.5478	59.0069	0.559126	1.20626e-07	3.2875	5.60002	0.768156	0.323198	0.066	0.078	0.012	1	1.69365e-13	FALSE	0.205756	FALSE	no	yes	FALSE	0
uc003ext.1	chr3:149682691..149688741,-	BRCA_ctrl	BRCA_cancer	PFN2	40.5478	59.0069	0.559126	1.20626e-07	9.188	19.154	1.05999	3.35474e-14	0.196	0.318	0.122	1.69365e-13	1.69365e-13	FALSE	0.608861	TRUE	no	yes	FALSE	0
uc003exu.1	chr3:149682691..149688741,-	BRCA_ctrl	BRCA_cancer	PFN2	40.5478	59.0069	0.559126	1.20626e-07	28.0704	33.7792	0.26708	0.0582297	0.738	0.596	-0.142	2.9004e-08	1.69365e-13	FALSE	0.694485	TRUE	no	yes	FALSE	0
uc003fab.1	chr3:154741913..154901518,+	BRCA_ctrl	BRCA_cancer	MME	57.6051	5.49953	-3.39096	2.59848e-185	12.8455	1.42052	-3.17643	1.65056e-50	0.233	0.28	0.047	1	3.17311e-07	FALSE	1	TRUE	no	yes	FALSE	0
uc003fac.1	chr3:154741913..154901518,+	BRCA_ctrl	BRCA_cancer	MME	57.6051	5.49953	-3.39096	2.59848e-185	22.5362	2.62859	-3.09973	1.99622e-97	0.403	0.53	0.127	1	3.17311e-07	FALSE	1	TRUE	no	yes	FALSE	0
uc003fad.1	chr3:154741913..154901518,+	BRCA_ctrl	BRCA_cancer	MME	57.6051	5.49953	-3.39096	2.59848e-185	2.99885	0.110716	-4.75463	1.87265e-29	0.047	0.017	-0.03	1	3.17311e-07	FALSE	1	TRUE	no	yes	FALSE	0
uc003fae.1	chr3:154741913..154901518,+	BRCA_ctrl	BRCA_cancer	MME	57.6051	5.49953	-3.39096	2.59848e-185	19.2075	1.30132	-3.88325	1.74424e-70	0.317	0.17	-0.147	3.17311e-07	3.17311e-07	FALSE	1	TRUE	no	yes	FALSE	0
uc003fft.2	chr3:169490853..169505335,+	BRCA_ctrl	BRCA_cancer	MYNN	9.1079	8.28336	-0.125854	0.0304814	6.27222	4.6609	-0.428194	9.70224e-07	0.682	0.571	-0.111	3.08526e-05	3.08526e-05	FALSE	1	TRUE	no	yes	NA	0
uc003ffu.2	chr3:169490853..169505335,+	BRCA_ctrl	BRCA_cancer	MYNN	9.1079	8.28336	-0.125854	0.0304814	0.672558	1.11923	0.73402	0.00261503	0.075	0.122	0.047	1	3.08526e-05	FALSE	1	TRUE	no	yes	NA	0
uc003ffw.1	chr3:169490853..169505335,+	BRCA_ctrl	BRCA_cancer	MYNN	9.1079	8.28336	-0.125854	0.0304814	1.23146	0.995177	-0.306746	0.105229	0.136	0.11	-0.026	1	3.08526e-05	NA	0.866004	TRUE	NA	NA	NA	0
uc003fhs.2	chr3:171318620..171528273,-	BRCA_ctrl	BRCA_cancer	PLD1	6.88495	3.00967	-1.22327	1.17124e-36	2.93317	0.461989	-2.66534	2.7379e-71	0.408	0.169	-0.239	9.12626e-15	9.12626e-15	FALSE	1	TRUE	no	yes	FALSE	0
uc003fht.2	chr3:171318620..171528273,-	BRCA_ctrl	BRCA_cancer	PLD1	6.88495	3.00967	-1.22327	1.17124e-36	3.67827	2.37294	-0.632283	1.27754e-08	0.552	0.778	0.226	2.8048e-14	9.12626e-15	FALSE	1	TRUE	no	yes	FALSE	0
uc003foi.2	chr3:184064340..184079391,-	BRCA_ctrl	BRCA_cancer	CLCN2	1.11472	2.85378	1.37911	1.95971e-56	0.75469	2.17023	1.5222	9.73332e-29	0.643	0.75	0.107	0.000243507	0.000243507	FALSE	1	TRUE	no	yes	NA	0
uc003fpy.2	chr3:185764108..185826901,-	BRCA_ctrl	BRCA_cancer	ETV5	11.7009	5.14602	-1.18774	3.51402e-37	6.86167	3.71233	-0.886199	1.80265e-19	0.679	0.821	0.142	0.000322498	0.000322498	FALSE	0.999999	TRUE	no	yes	FALSE	0
uc003fpz.2	chr3:185764108..185826901,-	BRCA_ctrl	BRCA_cancer	ETV5	11.7009	5.14602	-1.18774	3.51402e-37	4.83919	1.43369	-1.75467	3.10912e-09	0.321	0.179	-0.142	0.000322498	0.000322498	FALSE	0.999998	TRUE	no	yes	FALSE	0
uc003frp.3	chr3:187439165..187463475,-	BRCA_ctrl	BRCA_cancer	BCL6	38.5625	16.5904	-1.23258	4.92605e-70	17.775	5.6708	-1.64811	3.97864e-36	0.442	0.324	-0.118	4.60657e-08	4.60657e-08	FALSE	1	TRUE	no	yes	NA	0
uc003frq.1	chr3:187439165..187463475,-	BRCA_ctrl	BRCA_cancer	BCL6	38.5625	16.5904	-1.23258	4.92605e-70	12.4221	6.38419	-0.960231	7.72625e-11	0.328	0.38	0.052	1	4.60657e-08	FALSE	1	TRUE	no	yes	NA	0
uc011bsf.1	chr3:187439165..187463475,-	BRCA_ctrl	BRCA_cancer	BCL6	38.5625	16.5904	-1.23258	4.92605e-70	8.11235	4.34082	-0.902314	1.33726e-31	0.223	0.284	0.061	1	4.60657e-08	FALSE	1	TRUE	no	yes	NA	0
uc003frv.1	chr3:188665003..189041270,+	BRCA_ctrl	BRCA_cancer	TPRG1	3.39797	12.8303	1.70716	6.38242e-11	2.26056	1.40056	-0.690375	1.82069e-05	0.666	0.458	-0.207	3.66036e-05	3.66036e-05	FALSE	0.989974	TRUE	no	yes	FALSE	0
uc003frw.1	chr3:188665003..189041270,+	BRCA_ctrl	BRCA_cancer	TPRG1	3.39797	12.8303	1.70716	6.38242e-11	1.13742	11.4297	3.32813	4.01e-15	0.334	0.542	0.207	3.66036e-05	3.66036e-05	FALSE	0.990593	TRUE	no	yes	FALSE	0
uc003fsc.2	chr3:189349216..189615068,+	BRCA_ctrl	BRCA_cancer	TP63	21.3148	3.3185	-2.67622	3.45559e-73	16.7401	2.04225	-3.03479	8.69347e-29	0.694	0.402	-0.292	4.0328e-06	4.0328e-06	FALSE	1	TRUE	no	yes	TRUE	0
uc003fsd.2	chr3:189349216..189615068,+	BRCA_ctrl	BRCA_cancer	TP63	21.3148	3.3185	-2.67622	3.45559e-73	1.31235	0.34467	-1.92757	1.24662e-11	0.089	0.132	0.043	1	4.0328e-06	FALSE	0.999987	TRUE	no	yes	TRUE	0
uc010hzd.1	chr3:189349216..189615068,+	BRCA_ctrl	BRCA_cancer	TP63	21.3148	3.3185	-2.67622	3.45559e-73	1.82436	0.716685	-1.34749	5.09228e-06	0.155	0.38	0.225	0.00049749	4.0328e-06	FALSE	0.999998	TRUE	no	yes	TRUE	0
uc003fsv.2	chr3:191046874..191116458,+	BRCA_ctrl	BRCA_cancer	CCDC50	19.7288	7.2744	-1.41633	1.27579e-191	4.85559	3.68179	-0.399289	9.71411e-07	0.32	0.527	0.206	8.82315e-07	8.82315e-07	FALSE	0.999996	TRUE	no	yes	TRUE	0
uc003fsw.2	chr3:191046874..191116458,+	BRCA_ctrl	BRCA_cancer	CCDC50	19.7288	7.2744	-1.41633	1.27579e-191	14.8732	3.59262	-2.04951	8.86561e-145	0.68	0.473	-0.206	8.82315e-07	8.82315e-07	FALSE	0.999347	TRUE	no	yes	TRUE	0
uc003fxy.2	chr3:197319987..197354752,-	BRCA_ctrl	BRCA_cancer	LOC220729	5.65377	5.2157	-0.0503009	0.527051	3.06192	3.22154	0.0736765	0.392033	0.546	0.637	0.091	1	2.96084e-16	NA	0.634725	TRUE	NA	NA	NA	0
uc011bug.1	chr3:197319987..197354752,-	BRCA_ctrl	BRCA_cancer	LOC220729	5.65377	5.2157	-0.0503009	0.527051	2.23189	1.4128	-0.657256	2.39994e-12	0.394	0.264	-0.13	2.96084e-16	2.96084e-16	NA	0.0750051	FALSE	NA	NA	NA	0
uc003fym.2	chr3:197615947..197686886,-	BRCA_ctrl	BRCA_cancer	IQCG	8.66981	11.6738	0.373495	5.15298e-05	3.48272	4.89349	0.490363	0.0267397	0.356	0.253	-0.103	3.96287e-07	7.08291e-13	FALSE	0.93597	TRUE	no	yes	TRUE	0
uc003fyo.2	chr3:197615947..197686886,-	BRCA_ctrl	BRCA_cancer	IQCG	8.66981	11.6738	0.373495	5.15298e-05	1.29279	3.43386	1.40773	8.13714e-18	0.156	0.354	0.198	7.08291e-13	7.08291e-13	FALSE	0.999991	TRUE	no	yes	TRUE	0
uc003fyp.2	chr3:197615947..197686886,-	BRCA_ctrl	BRCA_cancer	IQCG	8.66981	11.6738	0.373495	5.15298e-05	3.14007	2.14076	-0.551863	1.16891e-11	0.394	0.25	-0.145	0.000208192	7.08291e-13	FALSE	0.999991	TRUE	no	yes	TRUE	0
uc003ccn.2	chr3:23958639..23965185,+	BRCA_ctrl	BRCA_cancer	RPL15	596.754	410.968	-0.530937	8.7767e-30	20.7484	28.7855	0.472321	0.517871	0.036	0.071	0.035	1	3.65193e-11	FALSE	0.953125	TRUE	no	yes	NA	0
uc003cco.2	chr3:23958639..23965185,+	BRCA_ctrl	BRCA_cancer	RPL15	596.754	410.968	-0.530937	8.7767e-30	1.53547	0.793476	-0.950789	1.56533e-32	0.003	0.002	-0.001	1	3.65193e-11	FALSE	0.634175	TRUE	no	yes	NA	0
uc003ccp.2	chr3:23958639..23965185,+	BRCA_ctrl	BRCA_cancer	RPL15	596.754	410.968	-0.530937	8.7767e-30	150.323	122.382	-0.296702	1.1334e-06	0.251	0.3	0.049	1	3.65193e-11	FALSE	0.952981	TRUE	no	yes	NA	0
uc003ccq.2	chr3:23958639..23965185,+	BRCA_ctrl	BRCA_cancer	RPL15	596.754	410.968	-0.530937	8.7767e-30	28.2807	42.7425	0.595782	2.98499e-10	0.047	0.107	0.06	1	3.65193e-11	FALSE	0.952853	TRUE	no	yes	NA	0
uc003ccr.2	chr3:23958639..23965185,+	BRCA_ctrl	BRCA_cancer	RPL15	596.754	410.968	-0.530937	8.7767e-30	395.864	216.265	-0.872212	2.63102e-44	0.664	0.52	-0.144	3.65193e-11	3.65193e-11	FALSE	0.953168	TRUE	no	yes	NA	0
uc003cdl.2	chr3:25760436..25831530,-	BRCA_ctrl	BRCA_cancer	NGLY1	13.0722	12.5544	-0.0764328	0.121509	11.5229	8.91228	-0.370487	1.68424e-06	0.879	0.702	-0.177	1.46434e-15	6.74104e-17	FALSE	1	TRUE	no	yes	TRUE	0
uc003cdm.2	chr3:25760436..25831530,-	BRCA_ctrl	BRCA_cancer	NGLY1	13.0722	12.5544	-0.0764328	0.121509	0.947779	2.44226	1.36346	2.0859e-37	0.074	0.192	0.119	6.74104e-17	6.74104e-17	FALSE	0.999997	TRUE	no	yes	TRUE	0
uc003cfl.3	chr3:33155450..33189264,+	BRCA_ctrl	BRCA_cancer	CRTAP	58.9339	25.549	-1.20076	3.57666e-152	42.5827	22.2763	-0.934731	6.83487e-34	0.746	0.874	0.128	8.10834e-07	8.10834e-07	FALSE	0.999992	TRUE	yes	no	TRUE	1
uc003cfm.2	chr3:33155450..33189264,+	BRCA_ctrl	BRCA_cancer	CRTAP	58.9339	25.549	-1.20076	3.57666e-152	2.72442	1.11674	-1.28678	1.79987e-24	0.048	0.045	-0.003	1	8.10834e-07	FALSE	0.989715	TRUE	no	no	TRUE	1
uc003cfn.2	chr3:33155450..33189264,+	BRCA_ctrl	BRCA_cancer	CRTAP	58.9339	25.549	-1.20076	3.57666e-152	13.5106	2.1067	-2.68085	9.68625e-09	0.205	0.079	-0.125	1.33514e-06	8.10834e-07	FALSE	0.989751	TRUE	no	no	TRUE	0
uc003cgh.1	chr3:36422097..36589496,+	BRCA_ctrl	BRCA_cancer	STAC	1.98623	1.06475	-0.906845	4.60694e-07	1.52104	0.721772	-1.07468	0.00037486	0.749	0.45	-0.298	4.13295e-09	4.13295e-09	FALSE	0.999886	TRUE	no	yes	NA	0
uc003cgr.2	chr3:37094117..37217851,-	BRCA_ctrl	BRCA_cancer	LRRFIP2	16.5481	20.0151	0.247364	0.000243637	0.728681	1.2466	0.774437	9.32496e-08	0.044	0.064	0.02	1	1.14511e-16	FALSE	0.999981	TRUE	no	yes	FALSE	0
uc003cgs.3	chr3:37094117..37217851,-	BRCA_ctrl	BRCA_cancer	LRRFIP2	16.5481	20.0151	0.247364	0.000243637	10.9367	4.87488	-1.16563	2.93605e-21	0.68	0.265	-0.415	2.33804e-16	1.14511e-16	FALSE	0.999981	TRUE	no	yes	FALSE	0
uc003cgt.3	chr3:37094117..37217851,-	BRCA_ctrl	BRCA_cancer	LRRFIP2	16.5481	20.0151	0.247364	0.000243637	3.84113	12.977	1.75573	6.55875e-56	0.236	0.629	0.393	1.14511e-16	1.14511e-16	FALSE	0.999959	TRUE	no	yes	FALSE	0
uc003cgu.1	chr3:37284738..37408241,+	BRCA_ctrl	BRCA_cancer	GOLGA4	32.9193	27.6663	-0.300446	2.47276e-05	2.01388	1.32576	-0.601495	0.000867731	0.06	0.042	-0.019	1	1.58729e-16	FALSE	0.868497	TRUE	no	no	FALSE	0
uc003cgv.2	chr3:37284738..37408241,+	BRCA_ctrl	BRCA_cancer	GOLGA4	32.9193	27.6663	-0.300446	2.47276e-05	5.85893	10.0589	0.779696	6.43965e-17	0.196	0.351	0.155	1.58729e-16	1.58729e-16	FALSE	1	TRUE	no	yes	FALSE	0
uc003cgw.2	chr3:37284738..37408241,+	BRCA_ctrl	BRCA_cancer	GOLGA4	32.9193	27.6663	-0.300446	2.47276e-05	2.92735	1.51402	-0.950829	1.48145e-15	0.079	0.051	-0.028	1	1.58729e-16	FALSE	1	TRUE	no	yes	FALSE	0
uc003cgx.2	chr3:37284738..37408241,+	BRCA_ctrl	BRCA_cancer	GOLGA4	32.9193	27.6663	-0.300446	2.47276e-05	17.54	8.99999	-0.962566	2.27109e-32	0.518	0.321	-0.198	7.33953e-16	1.58729e-16	FALSE	1	TRUE	no	yes	FALSE	0
uc010hgs.2	chr3:37284738..37408241,+	BRCA_ctrl	BRCA_cancer	GOLGA4	32.9193	27.6663	-0.300446	2.47276e-05	4.57919	5.76758	0.332888	0.013102	0.146	0.236	0.09	1	1.58729e-16	FALSE	0.689639	TRUE	no	no	FALSE	0
uc003chm.2	chr3:38048989..38071154,-	BRCA_ctrl	BRCA_cancer	PLCD1	9.48892	6.28376	-0.578007	6.4291e-15	1.39382	1.5928	0.192237	0.102551	0.152	0.278	0.126	7.23737e-12	7.23737e-12	FALSE	1	TRUE	no	yes	FALSE	0
uc003chn.2	chr3:38048989..38071154,-	BRCA_ctrl	BRCA_cancer	PLCD1	9.48892	6.28376	-0.578007	6.4291e-15	8.0951	4.69096	-0.787022	6.91609e-21	0.848	0.722	-0.126	7.23737e-12	7.23737e-12	FALSE	1	TRUE	no	yes	FALSE	0
uc003cic.2	chr3:38388251..38456467,+	BRCA_ctrl	BRCA_cancer	XYLB	1.72396	2.40133	0.526782	5.20057e-09	1.25096	2.00637	0.681249	1.77352e-08	0.7	0.807	0.107	1.29332e-06	1.29332e-06	FALSE	0.999999	TRUE	no	yes	NA	NA
uc003cih.2	chr3:38537763..38567796,+	BRCA_ctrl	BRCA_cancer	EXOG	2.13344	1.74193	-0.279477	1.51514e-07	0.969212	1.1037	0.187464	0.221735	0.455	0.616	0.161	8.1996e-09	8.1996e-09	FALSE	0.999412	TRUE	no	yes	TRUE	0
uc011ayq.1	chr3:38537763..38567796,+	BRCA_ctrl	BRCA_cancer	EXOG	2.13344	1.74193	-0.279477	1.51514e-07	1.03046	0.53922	-0.934073	1.14416e-07	0.481	0.326	-0.155	1.33708e-08	8.1996e-09	FALSE	0.997871	TRUE	no	yes	TRUE	0
uc003cjg.2	chr3:39183344..39196053,-	BRCA_ctrl	BRCA_cancer	CSRNP1	51.0092	12.8376	-1.99399	5.19076e-171	26.1596	5.6366	-2.21428	3.62158e-63	0.483	0.38	-0.103	0.000156175	0.000156175	FALSE	1	TRUE	no	no	FALSE	0
uc003cjh.2	chr3:39183344..39196053,-	BRCA_ctrl	BRCA_cancer	CSRNP1	51.0092	12.8376	-1.99399	5.19076e-171	24.8496	7.20099	-1.78689	1.98983e-119	0.517	0.62	0.103	0.000156175	0.000156175	FALSE	1	TRUE	no	no	FALSE	0
uc003cpp.3	chr3:46448721..46451013,+	BRCA_ctrl	BRCA_cancer	CCRL2	2.8747	2.12841	-0.453544	1.24784e-06	2.50713	1.57959	-0.665501	3.55067e-09	0.856	0.728	-0.129	1.86409e-05	1.86409e-05	FALSE	0.998745	TRUE	no	yes	NA	0
uc003cso.2	chr3:48335591..48342886,-	BRCA_ctrl	BRCA_cancer	NME6	8.0676	9.87639	0.28976	1.38406e-09	1.46538	1.99473	0.444846	0.0761558	0.186	0.216	0.031	1	9.70237e-05	FALSE	0.95465	TRUE	no	yes	NA	0
uc003csp.3	chr3:48335591..48342886,-	BRCA_ctrl	BRCA_cancer	NME6	8.0676	9.87639	0.28976	1.38406e-09	4.17154	3.99056	-0.0638933	0.848755	0.513	0.389	-0.125	9.70237e-05	9.70237e-05	FALSE	0.935865	TRUE	no	yes	NA	0
uc011bbh.1	chr3:48335591..48342886,-	BRCA_ctrl	BRCA_cancer	NME6	8.0676	9.87639	0.28976	1.38406e-09	2.23295	3.50448	0.651211	9.85379e-18	0.276	0.354	0.078	1	9.70237e-05	FALSE	0.619351	TRUE	no	yes	NA	0
uc003csz.2	chr3:48473582..48481529,-	BRCA_ctrl	BRCA_cancer	CCDC51	7.14848	10.6019	0.586591	1.48924e-24	1.64264	3.80225	1.21034	8.09318e-14	0.23	0.334	0.104	7.1376e-05	7.1376e-05	FALSE	0.999977	TRUE	no	no	NA	0
uc003cta.2	chr3:48473582..48481529,-	BRCA_ctrl	BRCA_cancer	CCDC51	7.14848	10.6019	0.586591	1.48924e-24	0.923142	2.3761	1.36284	2.25478e-09	0.123	0.214	0.091	1	7.1376e-05	FALSE	0.999551	TRUE	no	no	NA	0
uc003ctc.2	chr3:48473582..48481529,-	BRCA_ctrl	BRCA_cancer	CCDC51	7.14848	10.6019	0.586591	1.48924e-24	1.79882	1.51146	-0.250982	0.571382	0.241	0.162	-0.079	1	7.1376e-05	FALSE	0.999977	TRUE	no	no	NA	0
uc003ctd.2	chr3:48473582..48481529,-	BRCA_ctrl	BRCA_cancer	CCDC51	7.14848	10.6019	0.586591	1.48924e-24	2.2013	2.27125	0.0451248	0.907426	0.327	0.231	-0.096	1	7.1376e-05	FALSE	0.999554	TRUE	no	no	NA	0
uc003ctm.1	chr3:48509197..48542228,-	BRCA_ctrl	BRCA_cancer	SHISA5	69.3482	100.613	0.565194	1.39979e-25	49.1216	60.0796	0.29052	1.45093e-06	0.712	0.6	-0.112	5.84344e-12	3.48919e-12	FALSE	0.278229	FALSE	no	yes	TRUE	0
uc003ctp.1	chr3:48509197..48542228,-	BRCA_ctrl	BRCA_cancer	SHISA5	69.3482	100.613	0.565194	1.39979e-25	16.4397	33.8354	1.04131	4.09878e-34	0.233	0.334	0.101	3.48919e-12	3.48919e-12	FALSE	0.984235	TRUE	yes	yes	TRUE	0
uc003ctt.2	chr3:48509197..48542228,-	BRCA_ctrl	BRCA_cancer	SHISA5	69.3482	100.613	0.565194	1.39979e-25	2.30052	3.71041	0.688518	6.2982e-12	0.033	0.035	0.002	1	3.48919e-12	FALSE	0.436899	TRUE	no	yes	TRUE	1
uc003ctv.2	chr3:48555126..48598562,-	BRCA_ctrl	BRCA_cancer	PFKFB4	1.52729	3.64547	1.25273	3.89428e-51	1.04013	2.81699	1.43633	8.18268e-14	0.613	0.738	0.126	0.00311161	0.00311161	FALSE	1	TRUE	no	yes	NA	0
uc003cww.2	chr3:49454212..49460012,-	BRCA_ctrl	BRCA_cancer	AMT	4.68742	2.10903	-1.17336	2.47643e-28	2.37405	0.82168	-1.52951	7.48214e-07	0.5	0.288	-0.212	9.01805e-08	9.01805e-08	FALSE	0.999984	TRUE	no	yes	NA	1
uc003czn.2	chr3:50337321..50349812,-	BRCA_ctrl	BRCA_cancer	HYAL1	5.14142	1.56568	-1.74048	2.40812e-52	2.0569	0.634152	-1.69628	2.56478e-25	0.4	0.366	-0.034	1	4.55839e-07	FALSE	0.418074	TRUE	no	no	NA	0
uc003czp.2	chr3:50337321..50349812,-	BRCA_ctrl	BRCA_cancer	HYAL1	5.14142	1.56568	-1.74048	2.40812e-52	1.23956	0.241154	-2.3564	5.76622e-19	0.228	0.125	-0.103	4.55839e-07	4.55839e-07	FALSE	0.99999	TRUE	yes	yes	NA	0
uc003czu.2	chr3:50355228..50360281,-	BRCA_ctrl	BRCA_cancer	HYAL2	31.932	30.4152	-0.0854347	0.12656	2.10079	11.6154	2.46634	4.23675e-18	0.078	0.381	0.302	9.46269e-10	9.46269e-10	FALSE	0.999997	TRUE	yes	yes	FALSE	0
uc003czv.2	chr3:50355228..50360281,-	BRCA_ctrl	BRCA_cancer	HYAL2	31.932	30.4152	-0.0854347	0.12656	27.7559	17.6695	-0.651483	8.11421e-12	0.858	0.583	-0.275	2.39797e-08	9.46269e-10	FALSE	0.999997	TRUE	yes	yes	FALSE	0
uc003dag.1	chr3:50378537..50383156,-	BRCA_ctrl	BRCA_cancer	ZMYND10	1.34323	7.91123	2.58721	1.53046e-37	1.16953	7.52163	2.68305	4.33708e-31	0.765	0.897	0.132	0.00501744	0.00501744	FALSE	0.999998	TRUE	no	yes	NA	NA
uc003ddz.2	chr3:52444527..52457656,+	BRCA_ctrl	BRCA_cancer	PHF7	2.2666	1.60599	-0.506506	5.5937e-10	1.38873	1.18967	-0.223108	0.0180984	0.62	0.76	0.14	1.89932e-09	1.89932e-09	FALSE	0.995993	TRUE	no	yes	NA	NA
uc003deq.2	chr3:52579368..52719866,-	BRCA_ctrl	BRCA_cancer	PBRM1	14.3518	10.5017	-0.447038	7.6095e-13	6.19258	1.99991	-1.63038	3.40423e-36	0.405	0.189	-0.216	7.61545e-11	7.61545e-11	FALSE	1	TRUE	no	yes	TRUE	0
uc003der.2	chr3:52579368..52719866,-	BRCA_ctrl	BRCA_cancer	PBRM1	14.3518	10.5017	-0.447038	7.6095e-13	0.931912	1.15103	0.304634	0.228749	0.068	0.114	0.045	1	7.61545e-11	FALSE	1	TRUE	no	yes	TRUE	0
uc003des.2	chr3:52579368..52719866,-	BRCA_ctrl	BRCA_cancer	PBRM1	14.3518	10.5017	-0.447038	7.6095e-13	1.61307	1.93064	0.259219	0.0958632	0.119	0.172	0.053	1	7.61545e-11	FALSE	1	TRUE	no	yes	TRUE	0
uc003dew.2	chr3:52579368..52719866,-	BRCA_ctrl	BRCA_cancer	PBRM1	14.3518	10.5017	-0.447038	7.6095e-13	1.45432	1.92734	0.406219	0.408669	0.096	0.143	0.047	1	7.61545e-11	FALSE	1	TRUE	no	yes	TRUE	0
uc003dex.2	chr3:52579368..52719866,-	BRCA_ctrl	BRCA_cancer	PBRM1	14.3518	10.5017	-0.447038	7.6095e-13	1.31118	1.95527	0.576402	5.72777e-05	0.121	0.247	0.126	1	7.61545e-11	NA	1	TRUE	NA	NA	TRUE	0
uc010hmk.1	chr3:52579368..52719866,-	BRCA_ctrl	BRCA_cancer	PBRM1	14.3518	10.5017	-0.447038	7.6095e-13	1.43075	0.667622	-1.09932	0.00177077	0.095	0.054	-0.041	1	7.61545e-11	FALSE	1	TRUE	no	yes	TRUE	0
uc003dig.2	chr3:56761446..57113336,-	BRCA_ctrl	BRCA_cancer	ARHGEF3	14.5018	14.4669	-0.00912611	0.990896	8.79542	7.66065	-0.199256	0.306611	0.6	0.477	-0.123	8.9847e-07	8.9847e-07	FALSE	0.999999	TRUE	no	yes	NA	0
uc003dih.2	chr3:56761446..57113336,-	BRCA_ctrl	BRCA_cancer	ARHGEF3	14.5018	14.4669	-0.00912611	0.990896	0.602752	1.11086	0.881302	0.0102163	0.04	0.073	0.033	1	8.9847e-07	FALSE	0.999999	TRUE	no	yes	NA	0
uc011bew.1	chr3:56761446..57113336,-	BRCA_ctrl	BRCA_cancer	ARHGEF3	14.5018	14.4669	-0.00912611	0.990896	4.07233	4.34093	0.0921147	0.616524	0.288	0.333	0.045	1	8.9847e-07	FALSE	0.999999	TRUE	no	yes	NA	0
uc003dje.1	chr3:57743174..57914894,+	BRCA_ctrl	BRCA_cancer	SLMAP	25.3209	16.5008	-0.506436	1.47227e-18	4.31646	3.93191	-0.134495	0.34734	0.178	0.222	0.044	1	7.66394e-14	FALSE	1	TRUE	no	yes	NA	0
uc003djf.1	chr3:57743174..57914894,+	BRCA_ctrl	BRCA_cancer	SLMAP	25.3209	16.5008	-0.506436	1.47227e-18	3.26309	3.88412	0.25138	0.0503968	0.137	0.22	0.084	1	7.66394e-14	FALSE	1	TRUE	no	yes	NA	0
uc003djh.2	chr3:57743174..57914894,+	BRCA_ctrl	BRCA_cancer	SLMAP	25.3209	16.5008	-0.506436	1.47227e-18	1.50468	0.503682	-1.57725	4.69012e-96	0.054	0.031	-0.022	1	7.66394e-14	FALSE	0.995667	TRUE	no	yes	NA	0
uc003dji.1	chr3:57743174..57914894,+	BRCA_ctrl	BRCA_cancer	SLMAP	25.3209	16.5008	-0.506436	1.47227e-18	11.7232	4.2832	-1.4524	4.28242e-59	0.458	0.271	-0.187	7.66394e-14	7.66394e-14	FALSE	0.999723	TRUE	no	yes	NA	0
uc011bfa.1	chr3:57743174..57914894,+	BRCA_ctrl	BRCA_cancer	SLMAP	25.3209	16.5008	-0.506436	1.47227e-18	1.11823	1.47847	0.402626	0.177642	0.041	0.085	0.043	1	7.66394e-14	FALSE	0.999749	TRUE	no	yes	NA	0
uc011bfc.1	chr3:57743174..57914894,+	BRCA_ctrl	BRCA_cancer	SLMAP	25.3209	16.5008	-0.506436	1.47227e-18	1.84604	0.182336	-3.33483	8.09674e-22	0.071	0.015	-0.056	1	7.66394e-14	FALSE	0.998565	TRUE	no	yes	NA	0
uc003dlf.2	chr3:62304711..62319318,+	BRCA_ctrl	BRCA_cancer	C3orf14	17.6573	31.4738	0.834221	1.08383e-13	12.5643	24.9045	0.986873	0.00523501	0.567	0.678	0.111	0.0177356	0.0177356	FALSE	0.317734	FALSE	no	yes	FALSE	0
uc003dlg.2	chr3:62304711..62319318,+	BRCA_ctrl	BRCA_cancer	C3orf14	17.6573	31.4738	0.834221	1.08383e-13	3.8436	4.5494	0.243022	0.805933	0.364	0.262	-0.103	1	0.0177356	FALSE	0.317997	FALSE	no	yes	FALSE	0
uc010hnq.2	chr3:62304711..62319318,+	BRCA_ctrl	BRCA_cancer	C3orf14	17.6573	31.4738	0.834221	1.08383e-13	1.24937	2.01993	0.691331	1.50337e-05	0.069	0.06	-0.008	1	0.0177356	FALSE	0.3155	FALSE	no	yes	FALSE	0
uc003bsh.2	chr3:9791628..9808352,+	BRCA_ctrl	BRCA_cancer	OGG1	8.40146	9.62107	0.10678	0.0257941	1.56708	2.50698	0.677556	3.17527e-19	0.188	0.258	0.07	1	2.06393e-15	FALSE	0.99965	TRUE	no	yes	TRUE	1
uc003bsi.2	chr3:9791628..9808352,+	BRCA_ctrl	BRCA_cancer	OGG1	8.40146	9.62107	0.10678	0.0257941	1.18608	2.52499	1.09006	5.07499e-16	0.139	0.262	0.123	2.04827e-10	2.06393e-15	FALSE	0.999848	TRUE	no	yes	TRUE	0
uc003bsm.2	chr3:9791628..9808352,+	BRCA_ctrl	BRCA_cancer	OGG1	8.40146	9.62107	0.10678	0.0257941	3.51379	2.22983	-0.655742	4.5011e-23	0.42	0.241	-0.179	2.06393e-15	2.06393e-15	FALSE	0.999978	TRUE	no	yes	TRUE	0
uc003btp.2	chr3:9908399..10067820,-	BRCA_ctrl	BRCA_cancer	CIDEC	263.046	6.50806	-5.34398	6.65911e-203	84.8881	2.13257	-5.31373	3.27583e-109	0.32	0.299	-0.021	1	2.93483e-07	FALSE	0.998721	TRUE	no	yes	NA	0
uc003btq.2	chr3:9908399..10067820,-	BRCA_ctrl	BRCA_cancer	CIDEC	263.046	6.50806	-5.34398	6.65911e-203	158.876	3.79071	-5.38867	6.65985e-89	0.571	0.331	-0.24	2.93483e-07	2.93483e-07	FALSE	0.998162	TRUE	no	yes	NA	0
uc003btr.2	chr3:9908399..10067820,-	BRCA_ctrl	BRCA_cancer	CIDEC	263.046	6.50806	-5.34398	6.65911e-203	2.48381	0.0638172	-5.24132	1.51904e-33	0.009	0.016	0.007	1	2.93483e-07	FALSE	0.974264	TRUE	no	yes	NA	0
uc003bts.2	chr3:9908399..10067820,-	BRCA_ctrl	BRCA_cancer	CIDEC	263.046	6.50806	-5.34398	6.65911e-203	16.3495	0.452564	-5.16905	2.11795e-94	0.086	0.182	0.096	1	2.93483e-07	FALSE	0.974396	TRUE	no	yes	NA	0
uc003btw.2	chr3:9944303..9958082,+	BRCA_ctrl	BRCA_cancer	IL17RE	9.0204	7.39296	-0.217204	0.113055	4.83836	3.11213	-0.636446	0.000920813	0.54	0.389	-0.151	5.84326e-05	5.84326e-05	FALSE	1	TRUE	yes	yes	NA	0
uc011atn.1	chr3:9944303..9958082,+	BRCA_ctrl	BRCA_cancer	IL17RE	9.0204	7.39296	-0.217204	0.113055	1.81504	0.921617	-0.976094	1.32352e-06	0.198	0.118	-0.08	1	5.84326e-05	NA	0.731889	TRUE	NA	NA	NA	0
uc003dts.2	chr3:99979686..100044078,+	BRCA_ctrl	BRCA_cancer	TBC1D23	14.3703	13.5546	-0.142612	0.00730495	3.19412	5.14797	0.688361	3.15299e-08	0.235	0.369	0.134	3.58607e-11	3.58607e-11	FALSE	1	TRUE	no	yes	FALSE	0
uc003dtt.2	chr3:99979686..100044078,+	BRCA_ctrl	BRCA_cancer	TBC1D23	14.3703	13.5546	-0.142612	0.00730495	7.44091	3.74579	-0.989948	4.12182e-22	0.502	0.271	-0.231	1.53372e-10	3.58607e-11	FALSE	1	TRUE	no	yes	FALSE	0
uc003dtu.2	chr3:99979686..100044078,+	BRCA_ctrl	BRCA_cancer	TBC1D23	14.3703	13.5546	-0.142612	0.00730495	3.73527	4.66082	0.319037	0.00143893	0.263	0.36	0.097	1	3.58607e-11	FALSE	0.250755	FALSE	no	no	FALSE	0
uc003hys.1	chr4:108968701..109089578,-	BRCA_ctrl	BRCA_cancer	LEF1	2.76809	10.786	1.93049	1.0659e-42	0.403593	1.84098	2.18512	1.19325e-14	0.172	0.179	0.006	1	6.82935e-12	NA	0.0923219	FALSE	NA	NA	NA	0
uc003hyt.1	chr4:108968701..109089578,-	BRCA_ctrl	BRCA_cancer	LEF1	2.76809	10.786	1.93049	1.0659e-42	1.00916	3.00373	1.57228	1.78512e-19	0.332	0.274	-0.059	1	6.82935e-12	FALSE	0.999872	TRUE	no	yes	NA	0
uc011cfj.1	chr4:108968701..109089578,-	BRCA_ctrl	BRCA_cancer	LEF1	2.76809	10.786	1.93049	1.0659e-42	0.609779	3.52953	2.52915	2.25675e-43	0.208	0.334	0.126	6.82935e-12	6.82935e-12	FALSE	0.974894	TRUE	no	yes	NA	0
uc003hyz.2	chr4:109541722..109551637,+	BRCA_ctrl	BRCA_cancer	RPL34	620.263	372.552	-0.706377	5.37205e-28	562.334	256.748	-1.13107	1.37151e-10	0.902	0.651	-0.251	7.21403e-13	7.21403e-13	FALSE	0.201986	FALSE	no	yes	FALSE	0
uc003hza.2	chr4:109541722..109551637,+	BRCA_ctrl	BRCA_cancer	RPL34	620.263	372.552	-0.706377	5.37205e-28	57.9288	115.803	0.999267	1.3065e-09	0.098	0.349	0.251	7.21403e-13	7.21403e-13	FALSE	0.201156	FALSE	no	yes	FALSE	0
uc003hzy.3	chr4:110834040..110933411,+	BRCA_ctrl	BRCA_cancer	EGF	6.87187	2.67593	-1.53583	1.66162e-21	4.2933	1.18275	-1.85952	5.17149e-12	0.528	0.324	-0.205	2.72386e-05	2.72386e-05	FALSE	1	TRUE	yes	yes	TRUE	0
uc010imk.2	chr4:110834040..110933411,+	BRCA_ctrl	BRCA_cancer	EGF	6.87187	2.67593	-1.53583	1.66162e-21	1.60304	1.07392	-0.578092	0.00256826	0.264	0.435	0.171	1	2.72386e-05	FALSE	0.993404	TRUE	no	yes	TRUE	0
uc003ibs.2	chr4:115519611..115598202,+	BRCA_ctrl	BRCA_cancer	UGT8	2.42701	1.63392	-0.570122	0.0196757	1.46746	0.98933	-0.568364	0.133829	0.542	0.383	-0.159	0.000426	0.000426	FALSE	0.999997	TRUE	no	yes	NA	0
uc003icr.3	chr4:120133782..120216672,+	BRCA_ctrl	BRCA_cancer	USP53	15.4336	6.11211	-1.35687	6.28554e-73	4.57964	1.21606	-1.91263	3.17315e-37	0.28	0.172	-0.108	1	1.44795e-06	FALSE	1	TRUE	no	yes	TRUE	0
uc003ics.3	chr4:120133782..120216672,+	BRCA_ctrl	BRCA_cancer	USP53	15.4336	6.11211	-1.35687	6.28554e-73	7.20209	2.45945	-1.54987	3.02264e-45	0.449	0.372	-0.077	1	1.44795e-06	FALSE	1	TRUE	no	yes	TRUE	0
uc003icu.3	chr4:120133782..120216672,+	BRCA_ctrl	BRCA_cancer	USP53	15.4336	6.11211	-1.35687	6.28554e-73	3.57778	2.40572	-0.572564	2.14785e-09	0.267	0.452	0.185	1.44795e-06	1.44795e-06	FALSE	1	TRUE	no	no	TRUE	0
uc003igu.3	chr4:130014829..130033842,+	BRCA_ctrl	BRCA_cancer	C4orf33	6.43792	6.52173	0.00295597	1	1.4527	0.766693	-0.920366	2.81941e-14	0.24	0.136	-0.104	2.58585e-09	8.36059e-12	FALSE	0.668607	TRUE	no	no	FALSE	0
uc010iod.2	chr4:130014829..130033842,+	BRCA_ctrl	BRCA_cancer	C4orf33	6.43792	6.52173	0.00295597	1	4.64931	5.59355	0.26624	0.00263305	0.706	0.838	0.132	8.36059e-12	8.36059e-12	FALSE	0.672256	TRUE	no	no	FALSE	0
uc003iif.2	chr4:141178440..141303710,+	BRCA_ctrl	BRCA_cancer	SCOC	41.1311	43.8638	0.0865279	0.175185	36.7086	33.2451	-0.142951	0.143058	0.898	0.757	-0.141	3.33157e-11	3.33157e-11	FALSE	0.367904	TRUE	no	yes	NA	0
uc003iig.2	chr4:141178440..141303710,+	BRCA_ctrl	BRCA_cancer	SCOC	41.1311	43.8638	0.0865279	0.175185	2.17459	3.78476	0.799201	9.33121e-11	0.053	0.09	0.037	1	3.33157e-11	FALSE	0.0804792	FALSE	no	yes	NA	0
uc011che.1	chr4:141178440..141303710,+	BRCA_ctrl	BRCA_cancer	SCOC	41.1311	43.8638	0.0865279	0.175185	1.42237	4.16656	1.54967	0.000223928	0.03	0.095	0.065	1	3.33157e-11	FALSE	0.337822	FALSE	no	yes	NA	0
uc011chf.1	chr4:141178440..141303710,+	BRCA_ctrl	BRCA_cancer	SCOC	41.1311	43.8638	0.0865279	0.175185	0.258434	1.34902	2.37832	4.86198e-07	0.006	0.026	0.02	1	3.33157e-11	FALSE	0.336018	FALSE	no	yes	NA	1
uc003ilc.2	chr4:148559536..148605280,-	BRCA_ctrl	BRCA_cancer	PRMT10	5.67672	4.04457	-0.532784	7.66145e-27	4.53142	2.58363	-0.810127	8.70175e-17	0.786	0.613	-0.174	1.12295e-06	1.12295e-06	FALSE	1	TRUE	no	yes	NA	0
uc003ilj.3	chr4:148999916..149363643,-	BRCA_ctrl	BRCA_cancer	NR3C2	6.11784	1.25236	-2.30455	1.17661e-121	5.02733	0.855768	-2.55382	1.05289e-83	0.801	0.599	-0.202	6.01184e-07	6.01184e-07	FALSE	1	TRUE	no	yes	NA	0
uc003goq.3	chr4:15969849..16085623,-	BRCA_ctrl	BRCA_cancer	PROM1	30.0984	18.8825	-0.678393	0.00393501	24.7639	12.2787	-1.01205	0.000764103	0.725	0.518	-0.206	9.29666e-07	9.29666e-07	FALSE	1	TRUE	yes	yes	FALSE	0
uc003gos.2	chr4:15969849..16085623,-	BRCA_ctrl	BRCA_cancer	PROM1	30.0984	18.8825	-0.678393	0.00393501	1.30668	2.41242	0.884293	0.0805639	0.048	0.136	0.088	1	9.29666e-07	FALSE	1	TRUE	yes	yes	FALSE	0
uc003gou.2	chr4:15969849..16085623,-	BRCA_ctrl	BRCA_cancer	PROM1	30.0984	18.8825	-0.678393	0.00393501	3.7472	3.59723	-0.0589165	0.909488	0.203	0.32	0.117	0.00607462	9.29666e-07	FALSE	1	TRUE	yes	yes	FALSE	0
uc003itu.2	chr4:175411328..175444044,-	BRCA_ctrl	BRCA_cancer	HPGD	15.1435	7.30525	-1.07819	1.66849e-06	13.14	5.50952	-1.25386	9.42578e-05	0.742	0.511	-0.23	0.000143726	0.000143726	FALSE	0.9909	TRUE	no	yes	NA	0
uc003gds.3	chr4:1795039..1810599,+	BRCA_ctrl	BRCA_cancer	FGFR3	1.39819	7.31527	2.39344	6.81361e-29	0.577142	2.77965	2.26645	1.5746e-24	0.438	0.448	0.01	1	0.000390796	FALSE	1	TRUE	yes	yes	NA	0
uc003gdu.2	chr4:1795039..1810599,+	BRCA_ctrl	BRCA_cancer	FGFR3	1.39819	7.31527	2.39344	6.81361e-29	0.555673	3.82752	2.78273	1.22251e-19	0.303	0.442	0.139	0.000390796	0.000390796	FALSE	1	TRUE	yes	yes	NA	0
uc003ivs.1	chr4:184426220..184432249,+	BRCA_ctrl	BRCA_cancer	ING2	9.17811	11.3043	0.316937	1.06107e-07	4.59151	7.77768	0.760741	1.82486e-26	0.504	0.683	0.18	1.28316e-12	1.28316e-12	FALSE	0.9912	TRUE	no	yes	TRUE	0
uc011ckk.1	chr4:184426220..184432249,+	BRCA_ctrl	BRCA_cancer	ING2	9.17811	11.3043	0.316937	1.06107e-07	4.58659	3.52661	-0.378951	9.07173e-06	0.496	0.317	-0.18	1.28316e-12	1.28316e-12	FALSE	0.956243	TRUE	no	yes	TRUE	0
uc003iwq.2	chr4:185615220..185655286,-	BRCA_ctrl	BRCA_cancer	MLF1IP	2.82465	13.8191	2.18732	3.08926e-83	2.02343	8.92366	2.14011	2.51401e-73	0.709	0.665	-0.044	1	1.91994e-15	FALSE	0.999895	TRUE	no	yes	NA	0
uc003iwr.1	chr4:185615220..185655286,-	BRCA_ctrl	BRCA_cancer	MLF1IP	2.82465	13.8191	2.18732	3.08926e-83	0.594062	4.50824	2.91976	2.79086e-50	0.169	0.297	0.128	1.91994e-15	1.91994e-15	FALSE	0.99711	TRUE	no	yes	NA	0
uc003gpr.1	chr4:20255235..20620788,+	BRCA_ctrl	BRCA_cancer	SLIT2	6.94136	2.30063	-1.59379	5.94423e-43	4.86145	1.33478	-1.86441	4.1589e-11	0.654	0.432	-0.223	0.00279117	0.00279117	FALSE	1	TRUE	yes	yes	FALSE	0
uc003gps.1	chr4:20255235..20620788,+	BRCA_ctrl	BRCA_cancer	SLIT2	6.94136	2.30063	-1.59379	5.94423e-43	2.07991	0.965848	-1.10626	1.42788e-11	0.346	0.568	0.223	0.00279117	0.00279117	FALSE	1	TRUE	yes	yes	FALSE	0
uc011bvk.1	chr4:2271325..2420369,-	BRCA_ctrl	BRCA_cancer	ZFYVE28	2.3205	1.9478	-0.262874	0.00229079	1.80159	1.28555	-0.486689	0.00111069	0.768	0.625	-0.144	0.000130447	0.000130447	FALSE	1	TRUE	no	yes	NA	0
uc003grr.2	chr4:25657435..25680366,+	BRCA_ctrl	BRCA_cancer	SLC34A2	19.7931	10.5974	-0.901281	0.000294018	9.22128	4.59477	-1.00489	0.00985219	0.39	0.254	-0.137	0.000836199	0.000836199	FALSE	1	TRUE	no	yes	FALSE	0
uc003grs.2	chr4:25657435..25680366,+	BRCA_ctrl	BRCA_cancer	SLC34A2	19.7931	10.5974	-0.901281	0.000294018	10.5546	5.98338	-0.81879	0.00513648	0.609	0.721	0.112	0.00615002	0.000836199	FALSE	1	TRUE	no	yes	FALSE	0
uc003gfi.3	chr4:2794750..2842822,+	BRCA_ctrl	BRCA_cancer	SH3BP2	8.48523	6.28752	-0.497269	1.68051e-18	3.97697	1.66033	-1.26009	3.24018e-09	0.459	0.232	-0.227	1.01124e-11	1.01124e-11	FALSE	1	TRUE	no	yes	NA	0
uc011bvp.1	chr4:2794750..2842822,+	BRCA_ctrl	BRCA_cancer	SH3BP2	8.48523	6.28752	-0.497269	1.68051e-18	2.73763	2.07919	-0.396814	0.00351157	0.334	0.355	0.021	1	1.01124e-11	FALSE	1	TRUE	no	yes	NA	0
uc003gvv.3	chr4:41362804..41702059,+	BRCA_ctrl	BRCA_cancer	LIMCH1	36.2166	14.8085	-1.30282	1.72462e-40	1.02796	0.34585	-1.57053	3.90302e-05	0.027	0.018	-0.009	1	6.81736e-08	FALSE	1	TRUE	no	yes	NA	0
uc003gvw.3	chr4:41362804..41702059,+	BRCA_ctrl	BRCA_cancer	LIMCH1	36.2166	14.8085	-1.30282	1.72462e-40	11.3926	1.58667	-2.8437	5.34305e-35	0.265	0.122	-0.143	6.81736e-08	6.81736e-08	FALSE	1	TRUE	no	yes	NA	0
uc003gvx.3	chr4:41362804..41702059,+	BRCA_ctrl	BRCA_cancer	LIMCH1	36.2166	14.8085	-1.30282	1.72462e-40	4.10299	3.86281	-0.0870546	0.757194	0.149	0.21	0.06	1	6.81736e-08	FALSE	1	TRUE	no	yes	NA	0
uc003gvy.3	chr4:41362804..41702059,+	BRCA_ctrl	BRCA_cancer	LIMCH1	36.2166	14.8085	-1.30282	1.72462e-40	0.853566	1.77117	1.0528	0.00850658	0.031	0.103	0.072	1	6.81736e-08	FALSE	1	TRUE	no	yes	NA	0
uc003gwa.3	chr4:41362804..41702059,+	BRCA_ctrl	BRCA_cancer	LIMCH1	36.2166	14.8085	-1.30282	1.72462e-40	1.14207	0.318873	-1.83931	1.68824e-07	0.03	0.032	0.003	1	6.81736e-08	FALSE	1	TRUE	no	yes	NA	0
uc003gwd.3	chr4:41362804..41702059,+	BRCA_ctrl	BRCA_cancer	LIMCH1	36.2166	14.8085	-1.30282	1.72462e-40	2.52551	1.38365	-0.867941	0.000894402	0.087	0.108	0.021	1	6.81736e-08	FALSE	1	TRUE	no	yes	NA	0
uc010ifv.2	chr4:41362804..41702059,+	BRCA_ctrl	BRCA_cancer	LIMCH1	36.2166	14.8085	-1.30282	1.72462e-40	1.20941	0.47446	-1.34918	1.56406e-06	0.038	0.046	0.008	1	6.81736e-08	NA	0.00280286	FALSE	NA	NA	NA	0
uc011byw.1	chr4:41362804..41702059,+	BRCA_ctrl	BRCA_cancer	LIMCH1	36.2166	14.8085	-1.30282	1.72462e-40	11.489	4.50859	-1.34943	2.22424e-34	0.333	0.317	-0.016	1	6.81736e-08	FALSE	0.999613	TRUE	no	yes	NA	0
uc003gzy.2	chr4:54243820..54326102,+	BRCA_ctrl	BRCA_cancer	FIP1L1	16.7725	19.2209	0.335525	1.8272e-14	1.79033	4.08518	1.18996	5.64269e-17	0.103	0.207	0.105	1	9.63722e-17	FALSE	1	TRUE	no	yes	TRUE	0
uc003gzz.2	chr4:54243820..54326102,+	BRCA_ctrl	BRCA_cancer	FIP1L1	16.7725	19.2209	0.335525	1.8272e-14	3.35152	5.51185	0.717619	3.32912e-18	0.2	0.285	0.085	1	9.63722e-17	FALSE	0.999998	TRUE	no	yes	TRUE	0
uc003hac.2	chr4:54243820..54326102,+	BRCA_ctrl	BRCA_cancer	FIP1L1	16.7725	19.2209	0.335525	1.8272e-14	2.53264	2.6	0.0379625	0.828063	0.156	0.136	-0.019	1	9.63722e-17	FALSE	0.999035	TRUE	no	no	TRUE	0
uc003had.2	chr4:54243820..54326102,+	BRCA_ctrl	BRCA_cancer	FIP1L1	16.7725	19.2209	0.335525	1.8272e-14	5.60201	2.86413	-0.967648	8.30683e-17	0.339	0.154	-0.186	9.63722e-17	9.63722e-17	FALSE	0.939772	TRUE	yes	no	TRUE	0
uc011bzu.1	chr4:54243820..54326102,+	BRCA_ctrl	BRCA_cancer	FIP1L1	16.7725	19.2209	0.335525	1.8272e-14	2.08393	2.69023	0.36797	0.00473829	0.119	0.142	0.023	1	9.63722e-17	FALSE	1	TRUE	no	yes	TRUE	0
uc003hag.3	chr4:54326439..54518682,-	BRCA_ctrl	BRCA_cancer	LNX1	6.82539	5.95237	-0.145707	0.0770418	5.56979	5.62683	0.0147364	0.93978	0.821	0.917	0.096	1	3.81299e-14	FALSE	1	TRUE	no	yes	NA	0
uc003hah.3	chr4:54326439..54518682,-	BRCA_ctrl	BRCA_cancer	LNX1	6.82539	5.95237	-0.145707	0.0770418	1.22705	0.250558	-2.28866	4.19095e-20	0.173	0.059	-0.114	3.81299e-14	3.81299e-14	NA	0.863811	TRUE	NA	NA	NA	0
uc003hbe.1	chr4:56719816..56771244,+	BRCA_ctrl	BRCA_cancer	EXOC1	16.125	12.45	-0.365404	7.87095e-18	0.628894	3.57092	2.50358	1.22698e-15	0.04	0.273	0.233	1.0684e-13	4.47712e-16	FALSE	1	TRUE	no	yes	FALSE	0
uc003hbf.1	chr4:56719816..56771244,+	BRCA_ctrl	BRCA_cancer	EXOC1	16.125	12.45	-0.365404	7.87095e-18	5.75019	4.88003	-0.236668	0.0184754	0.365	0.385	0.02	1	4.47712e-16	FALSE	1	TRUE	no	yes	FALSE	0
uc003hbg.1	chr4:56719816..56771244,+	BRCA_ctrl	BRCA_cancer	EXOC1	16.125	12.45	-0.365404	7.87095e-18	9.74594	3.99908	-1.28501	4.9992e-70	0.595	0.341	-0.253	4.47712e-16	4.47712e-16	FALSE	1	TRUE	no	yes	FALSE	0
uc003gbe.2	chr4:699573..764425,+	BRCA_ctrl	BRCA_cancer	PCGF3	12.9889	15.8077	0.0766599	0.188385	5.63247	6.67191	0.244311	0.00609192	0.441	0.433	-0.008	1	4.61919e-13	FALSE	0.998762	TRUE	no	yes	NA	0
uc003gbh.2	chr4:699573..764425,+	BRCA_ctrl	BRCA_cancer	PCGF3	12.9889	15.8077	0.0766599	0.188385	4.0594	2.75222	-0.560642	0.00314542	0.305	0.167	-0.138	4.61919e-13	4.61919e-13	FALSE	0.994899	TRUE	no	no	NA	0
uc010ibh.2	chr4:699573..764425,+	BRCA_ctrl	BRCA_cancer	PCGF3	12.9889	15.8077	0.0766599	0.188385	0.973912	1.0393	0.0938605	0.781538	0.079	0.07	-0.009	1	4.61919e-13	FALSE	0.998761	TRUE	no	yes	NA	0
uc011bva.1	chr4:699573..764425,+	BRCA_ctrl	BRCA_cancer	PCGF3	12.9889	15.8077	0.0766599	0.188385	1.19735	3.10811	1.37563	3.64859e-35	0.092	0.192	0.1	1	4.61919e-13	FALSE	0.999036	TRUE	no	yes	NA	0
uc003hej.2	chr4:70146217..70160767,+	BRCA_ctrl	BRCA_cancer	UGT2B28	14.7524	3.15251	-2.2484	9.88613e-09	14.137	2.73435	-2.36974	4.32198e-05	0.653	0.379	-0.274	0.00877646	0.00877646	FALSE	0.99999	TRUE	yes	yes	NA	NA
uc003hfs.2	chr4:71681499..71705627,-	BRCA_ctrl	BRCA_cancer	GRSF1	15.9433	18.5993	0.229842	4.30982e-06	3.90191	2.81889	-0.469013	0.00119186	0.253	0.154	-0.099	1	3.847e-07	FALSE	0.99837	TRUE	no	yes	NA	1
uc010iia.1	chr4:71681499..71705627,-	BRCA_ctrl	BRCA_cancer	GRSF1	15.9433	18.5993	0.229842	4.30982e-06	9.65814	14.149	0.550965	1.09115e-14	0.609	0.758	0.149	3.847e-07	3.847e-07	FALSE	0.999994	TRUE	no	yes	NA	0
uc011caz.1	chr4:71681499..71705627,-	BRCA_ctrl	BRCA_cancer	GRSF1	15.9433	18.5993	0.229842	4.30982e-06	2.38323	1.63149	-0.546618	0.000240507	0.138	0.088	-0.05	1	3.847e-07	FALSE	0.999627	TRUE	no	yes	NA	0
uc003hgs.3	chr4:74269972..74287127,+	BRCA_ctrl	BRCA_cancer	ALB	37.8932	34.7241	-0.191456	0.68651	36.2387	26.8362	-0.433338	0.637555	0.762	0.189	-0.573	7.00203e-14	7.00203e-14	FALSE	1	TRUE	yes	yes	TRUE	0
uc003hgx.3	chr4:74269972..74287127,+	BRCA_ctrl	BRCA_cancer	ALB	37.8932	34.7241	-0.191456	0.68651	1.43198	7.35433	2.35943	0.00285753	0.074	0.201	0.127	1	7.00203e-14	FALSE	0.994126	TRUE	no	yes	TRUE	0
uc003hhc.1	chr4:74438862..74486340,-	BRCA_ctrl	BRCA_cancer	RASSF6	5.10391	1.93044	-1.39711	6.79708e-21	2.43564	1.00861	-1.27148	5.14392e-07	0.406	0.415	0.008	1	0.000600693	FALSE	0.997218	TRUE	no	yes	NA	0
uc010iik.1	chr4:74438862..74486340,-	BRCA_ctrl	BRCA_cancer	RASSF6	5.10391	1.93044	-1.39711	6.79708e-21	1.90495	0.467029	-2.02682	1.69621e-25	0.454	0.313	-0.141	0.000600693	0.000600693	FALSE	0.992465	TRUE	no	no	NA	0
uc003gbi.2	chr4:778746..819945,-	BRCA_ctrl	BRCA_cancer	CPLX1	2.05635	3.29273	0.688645	7.30211e-07	0.637779	1.77611	1.47575	1.32352e-06	0.288	0.494	0.206	0.0303331	0.0303331	FALSE	0.997991	TRUE	no	yes	TRUE	1
uc003gbj.2	chr4:778746..819945,-	BRCA_ctrl	BRCA_cancer	CPLX1	2.05635	3.29273	0.688645	7.30211e-07	1.41857	1.51663	0.0963019	0.804655	0.712	0.506	-0.206	0.0303331	0.0303331	FALSE	0.0473563	FALSE	no	yes	TRUE	0
uc003gkv.3	chr4:8201060..8242828,+	BRCA_ctrl	BRCA_cancer	SH3TC1	2.75952	3.85167	0.485323	2.91187e-08	0.740336	1.44362	0.963077	5.49191e-08	0.245	0.367	0.122	3.7794e-05	3.7794e-05	FALSE	1	TRUE	no	no	NA	0
uc003hpk.2	chr4:86396284..86923822,+	BRCA_ctrl	BRCA_cancer	ARHGAP24	6.05137	2.30116	-1.40376	7.53005e-79	2.31559	0.594896	-1.95963	3.69134e-34	0.376	0.215	-0.161	1.89189e-11	1.89189e-11	FALSE	1	TRUE	no	yes	TRUE	0
uc003hpl.2	chr4:86396284..86923822,+	BRCA_ctrl	BRCA_cancer	ARHGAP24	6.05137	2.30116	-1.40376	7.53005e-79	1.58646	0.997199	-0.669531	0.00104747	0.266	0.424	0.158	2.66296e-10	1.89189e-11	FALSE	1	TRUE	no	yes	TRUE	0
uc010ikf.2	chr4:86396284..86923822,+	BRCA_ctrl	BRCA_cancer	ARHGAP24	6.05137	2.30116	-1.40376	7.53005e-79	1.9465	0.633054	-1.61987	1.43643e-13	0.324	0.332	0.008	1	1.89189e-11	FALSE	1	TRUE	no	yes	TRUE	0
uc003hpo.2	chr4:86937633..87515263,-	BRCA_ctrl	BRCA_cancer	MAPK10	11.7346	2.68503	-2.21808	8.97246e-72	3.05413	0.821098	-1.89412	3.05937e-35	0.303	0.384	0.082	1	1.02037e-09	FALSE	0.998513	TRUE	no	yes	TRUE	0
uc003hpq.2	chr4:86937633..87515263,-	BRCA_ctrl	BRCA_cancer	MAPK10	11.7346	2.68503	-2.21808	8.97246e-72	2.3548	0.253745	-3.20933	7.06077e-28	0.171	0.082	-0.089	1	1.02037e-09	FALSE	0.999988	TRUE	no	yes	TRUE	0
uc003hpt.2	chr4:86937633..87515263,-	BRCA_ctrl	BRCA_cancer	MAPK10	11.7346	2.68503	-2.21808	8.97246e-72	3.37152	0.257719	-3.70455	1.34213e-34	0.232	0.067	-0.165	1.02037e-09	1.02037e-09	FALSE	0.999955	TRUE	no	no	TRUE	0
uc011ccw.1	chr4:86937633..87515263,-	BRCA_ctrl	BRCA_cancer	MAPK10	11.7346	2.68503	-2.21808	8.97246e-72	1.6196	0.906683	-0.836374	0.000346945	0.169	0.286	0.117	1	1.02037e-09	FALSE	0.997911	TRUE	no	yes	TRUE	0
uc003hrg.2	chr4:89011417..89152474,-	BRCA_ctrl	BRCA_cancer	ABCG2	3.29656	1.05817	-1.61114	1.04434e-46	2.25069	0.670566	-1.7461	2.42815e-21	0.673	0.514	-0.158	0.000101678	0.000101678	FALSE	1	TRUE	no	yes	NA	0
uc003hsa.1	chr4:89647106..90032549,-	BRCA_ctrl	BRCA_cancer	FAM13A	28.2888	5.04095	-2.64916	1.63961e-306	1.19213	0.121717	-3.28686	7.02305e-63	0.041	0.021	-0.02	1	1.20293e-06	FALSE	0.999997	TRUE	no	no	TRUE	0
uc003hsb.1	chr4:89647106..90032549,-	BRCA_ctrl	BRCA_cancer	FAM13A	28.2888	5.04095	-2.64916	1.63961e-306	12.2567	1.33866	-3.19424	1.0726e-58	0.385	0.229	-0.156	1.20293e-06	1.20293e-06	FALSE	1	TRUE	no	no	TRUE	0
uc003hsc.1	chr4:89647106..90032549,-	BRCA_ctrl	BRCA_cancer	FAM13A	28.2888	5.04095	-2.64916	1.63961e-306	4.49813	0.434487	-3.37052	5.06582e-32	0.127	0.079	-0.048	1	1.20293e-06	FALSE	1	TRUE	no	no	TRUE	0
uc003hsd.1	chr4:89647106..90032549,-	BRCA_ctrl	BRCA_cancer	FAM13A	28.2888	5.04095	-2.64916	1.63961e-306	1.67194	0.22703	-2.87793	2.54251e-34	0.046	0.052	0.006	1	1.20293e-06	FALSE	1	TRUE	no	no	TRUE	0
uc003hse.1	chr4:89647106..90032549,-	BRCA_ctrl	BRCA_cancer	FAM13A	28.2888	5.04095	-2.64916	1.63961e-306	1.86403	0.373593	-2.31755	2.12661e-28	0.091	0.07	-0.021	1	1.20293e-06	FALSE	1	TRUE	no	yes	TRUE	0
uc003hsj.2	chr4:89647106..90032549,-	BRCA_ctrl	BRCA_cancer	FAM13A	28.2888	5.04095	-2.64916	1.63961e-306	1.54265	0.698796	-1.14099	1.42659e-23	0.075	0.141	0.066	1	1.20293e-06	FALSE	0.968449	TRUE	no	yes	TRUE	0
uc011cdp.1	chr4:89647106..90032549,-	BRCA_ctrl	BRCA_cancer	FAM13A	28.2888	5.04095	-2.64916	1.63961e-306	3.73639	1.32658	-1.49386	7.05935e-39	0.168	0.291	0.124	1	1.20293e-06	FALSE	0.618425	TRUE	no	no	TRUE	0
uc011cwc.1	chr5:114460467..114516243,-	BRCA_ctrl	BRCA_cancer	TRIM36	1.7933	3.18765	0.850703	8.83718e-06	1.2161	2.32428	0.934163	5.51199e-05	0.64	0.8	0.16	1.08721e-09	1.08721e-09	FALSE	1	TRUE	no	yes	NA	0
uc003ksj.2	chr5:118788148..118878027,+	BRCA_ctrl	BRCA_cancer	HSD17B4	57.5982	48.3604	-0.282033	4.31041e-05	47.5769	34.1038	-0.480289	1.19864e-06	0.83	0.698	-0.132	1	4.14183e-05	FALSE	1	TRUE	no	yes	TRUE	0
uc011cwj.1	chr5:118788148..118878027,+	BRCA_ctrl	BRCA_cancer	HSD17B4	57.5982	48.3604	-0.282033	4.31041e-05	8.22012	12.915	0.651724	0.0055655	0.141	0.273	0.132	4.14183e-05	4.14183e-05	FALSE	1	TRUE	no	yes	TRUE	0
uc003kuy.2	chr5:128301210..128369334,+	BRCA_ctrl	BRCA_cancer	SLC27A6	5.06667	1.12175	-2.18912	1.36442e-33	1.09366	0.383906	-1.50858	2.40036e-09	0.242	0.424	0.183	0.0192372	0.0192372	FALSE	1	TRUE	no	yes	TRUE	0
uc003kuz.2	chr5:128301210..128369334,+	BRCA_ctrl	BRCA_cancer	SLC27A6	5.06667	1.12175	-2.18912	1.36442e-33	3.97301	0.737848	-2.42763	4.56837e-27	0.758	0.576	-0.183	0.0192372	0.0192372	FALSE	1	TRUE	no	yes	TRUE	1
uc003kvs.1	chr5:130977407..131132756,-	BRCA_ctrl	BRCA_cancer	FNIP1	7.78745	7.07189	-0.136052	0.0787233	2.70929	3.95218	0.544688	0.0141779	0.36	0.471	0.111	9.68636e-06	9.68636e-06	FALSE	1	TRUE	no	yes	FALSE	0
uc003kvt.1	chr5:130977407..131132756,-	BRCA_ctrl	BRCA_cancer	FNIP1	7.78745	7.07189	-0.136052	0.0787233	4.98352	3.02504	-0.720075	2.37207e-22	0.629	0.518	-0.111	9.8117e-06	9.68636e-06	FALSE	1	TRUE	no	yes	FALSE	0
uc003kxr.2	chr5:132086509..132113561,-	BRCA_ctrl	BRCA_cancer	SEPT8	18.0046	22.7514	0.419218	9.74519e-11	4.0145	1.41066	-1.50806	3.85014e-94	0.218	0.065	-0.152	4.34457e-17	4.34457e-17	FALSE	1	TRUE	no	yes	NA	0
uc003kxs.1	chr5:132086509..132113561,-	BRCA_ctrl	BRCA_cancer	SEPT8	18.0046	22.7514	0.419218	9.74519e-11	1.58245	4.23069	1.4184	0.00317506	0.088	0.17	0.082	1	4.34457e-17	FALSE	0.999999	TRUE	no	yes	NA	0
uc003kxt.2	chr5:132086509..132113561,-	BRCA_ctrl	BRCA_cancer	SEPT8	18.0046	22.7514	0.419218	9.74519e-11	11.1119	13.5572	0.286944	0.000142508	0.626	0.627	0.001	1	4.34457e-17	FALSE	0.999994	TRUE	no	yes	NA	0
uc011cxi.1	chr5:132086509..132113561,-	BRCA_ctrl	BRCA_cancer	SEPT8	18.0046	22.7514	0.419218	9.74519e-11	1.08514	2.93703	1.43596	0.0174629	0.056	0.105	0.05	1	4.34457e-17	FALSE	0.999999	TRUE	no	yes	NA	0
uc003lac.1	chr5:134209460..134237323,+	BRCA_ctrl	BRCA_cancer	TXNDC15	19.6658	17.0894	-0.23677	4.15504e-08	14.6175	11.0802	-0.399719	2.18255e-17	0.747	0.654	-0.093	1	2.1545e-12	FALSE	0.999462	TRUE	yes	yes	NA	1
uc011cxv.1	chr5:134209460..134237323,+	BRCA_ctrl	BRCA_cancer	TXNDC15	19.6658	17.0894	-0.23677	4.15504e-08	4.29786	5.65248	0.395268	9.96165e-05	0.221	0.327	0.106	2.1545e-12	2.1545e-12	NA	0.999493	TRUE	NA	NA	NA	0
uc003lal.1	chr5:134670071..134735577,-	BRCA_ctrl	BRCA_cancer	H2AFY	61.3521	129.016	1.072	1.20309e-110	2.68473	2.52932	-0.0868357	0.408392	0.046	0.021	-0.025	1	1.68733e-16	NA	0.00235213	FALSE	NA	NA	FALSE	0
uc003lam.1	chr5:134670071..134735577,-	BRCA_ctrl	BRCA_cancer	H2AFY	61.3521	129.016	1.072	1.20309e-110	1.99497	13.774	2.7868	7.73339e-06	0.029	0.106	0.077	1	1.68733e-16	FALSE	0.999978	TRUE	no	yes	FALSE	0
uc003lan.1	chr5:134670071..134735577,-	BRCA_ctrl	BRCA_cancer	H2AFY	61.3521	129.016	1.072	1.20309e-110	21.3797	23.3273	0.125908	0.0688619	0.355	0.187	-0.168	1.68733e-16	1.68733e-16	FALSE	0.999978	TRUE	no	yes	FALSE	0
uc003lao.1	chr5:134670071..134735577,-	BRCA_ctrl	BRCA_cancer	H2AFY	61.3521	129.016	1.072	1.20309e-110	19.4641	54.9683	1.49773	1.36143e-24	0.308	0.426	0.118	1	1.68733e-16	FALSE	0.999977	TRUE	no	yes	FALSE	0
uc003las.1	chr5:134670071..134735577,-	BRCA_ctrl	BRCA_cancer	H2AFY	61.3521	129.016	1.072	1.20309e-110	9.22942	25.4863	1.46528	1.3918e-05	0.151	0.193	0.041	1	1.68733e-16	FALSE	0.999978	TRUE	no	yes	FALSE	0
uc003lat.1	chr5:134670071..134735577,-	BRCA_ctrl	BRCA_cancer	H2AFY	61.3521	129.016	1.072	1.20309e-110	4.29396	3.87688	-0.14736	0.901963	0.076	0.029	-0.047	1	1.68733e-16	FALSE	0.999977	TRUE	no	no	FALSE	0
uc003lau.1	chr5:134670071..134735577,-	BRCA_ctrl	BRCA_cancer	H2AFY	61.3521	129.016	1.072	1.20309e-110	0.800487	1.37106	0.774799	6.70094e-30	0.013	0.011	-0.002	1	1.68733e-16	NA	0.142545	FALSE	NA	NA	FALSE	0
uc011cxz.1	chr5:134670071..134735577,-	BRCA_ctrl	BRCA_cancer	H2AFY	61.3521	129.016	1.072	1.20309e-110	0.866133	2.59553	1.5811	6.93675e-07	0.011	0.018	0.007	1	1.68733e-16	FALSE	0.990589	TRUE	no	yes	FALSE	0
uc003lbt.2	chr5:137087075..137090052,-	BRCA_ctrl	BRCA_cancer	HNRNPA0	53.4452	71.8194	0.201064	2.28632e-06	46.2412	48.6397	0.0729556	0.121636	0.885	0.719	-0.166	1.29114e-07	1.29114e-07	FALSE	0.999631	TRUE	no	yes	TRUE	1
uc010jeo.2	chr5:137087075..137090052,-	BRCA_ctrl	BRCA_cancer	HNRNPA0	53.4452	71.8194	0.201064	2.28632e-06	7.20401	23.1798	1.68563	1.22013e-21	0.115	0.281	0.166	1.29114e-07	1.29114e-07	NA	0.00298702	FALSE	NA	NA	TRUE	0
uc003lda.2	chr5:137774776..137782657,+	BRCA_ctrl	BRCA_cancer	REEP2	2.69096	2.3865	-0.173554	0.299926	2.22007	1.96629	-0.175078	0.624147	0.794	0.661	-0.134	0.000220535	0.000220535	FALSE	0.999652	TRUE	no	yes	NA	NA
uc003ldm.2	chr5:138282412..138534065,-	BRCA_ctrl	BRCA_cancer	SIL1	20.1295	29.0724	0.535717	6.89178e-11	6.60198	6.28919	-0.0700797	0.850372	0.323	0.211	-0.112	0.0128661	0.0128661	FALSE	0.999999	TRUE	yes	no	FALSE	0
uc003ldp.2	chr5:138282412..138534065,-	BRCA_ctrl	BRCA_cancer	SIL1	20.1295	29.0724	0.535717	6.89178e-11	12.849	21.6183	0.750549	0.000396154	0.636	0.747	0.111	1	0.0128661	FALSE	0.999999	TRUE	yes	no	FALSE	0
uc003lem.2	chr5:138732255..138739776,-	BRCA_ctrl	BRCA_cancer	SPATA24	2.20262	2.02735	-0.0206418	0.868468	1.41781	0.91408	-0.631463	4.41257e-11	0.651	0.441	-0.211	6.68623e-11	6.68623e-11	FALSE	0.976599	TRUE	no	yes	NA	0
uc003lkf.1	chr5:140777695..140892546,+	BRCA_ctrl	BRCA_cancer	PCDHGB5	2.75662	2.10147	-0.404865	0.0258572	2.32958	1.73693	-0.42343	0.180424	0.831	0.609	-0.222	0.00692652	0.00692652	FALSE	1	TRUE	yes	yes	NA	NA
uc003lkl.1	chr5:140792743..140892546,+	BRCA_ctrl	BRCA_cancer	PCDHGA10	1.59393	1.47739	-0.120598	0.543666	1.05712	0.95834	-0.141508	0.765353	0.657	0.423	-0.234	0.000490383	0.000490383	FALSE	1	TRUE	yes	yes	NA	0
uc003lkn.1	chr5:140797282..140892546,+	BRCA_ctrl	BRCA_cancer	PCDHGB7	5.09863	1.43675	-1.89908	4.98109e-72	4.87447	1.21252	-2.00676	4.90366e-26	0.953	0.7	-0.253	0.000907215	0.000907215	FALSE	1	TRUE	yes	yes	NA	NA
uc003llb.3	chr5:140894589..140998622,-	BRCA_ctrl	BRCA_cancer	DIAPH1	32.3618	38.7908	0.149309	0.0085003	10.264	5.33689	-0.943474	0.000172665	0.318	0.134	-0.184	3.32027e-11	3.32027e-11	FALSE	1	TRUE	no	yes	TRUE	0
uc003llc.3	chr5:140894589..140998622,-	BRCA_ctrl	BRCA_cancer	DIAPH1	32.3618	38.7908	0.149309	0.0085003	7.61498	12.4397	0.707997	1.94224e-08	0.239	0.319	0.08	1	3.32027e-11	FALSE	1	TRUE	no	yes	TRUE	0
uc011dbd.1	chr5:140894589..140998622,-	BRCA_ctrl	BRCA_cancer	DIAPH1	32.3618	38.7908	0.149309	0.0085003	13.7258	20.1251	0.552003	2.01498e-17	0.421	0.525	0.104	1	3.32027e-11	FALSE	0.907333	TRUE	no	yes	TRUE	0
uc003lmm.2	chr5:141971744..142077635,-	BRCA_ctrl	BRCA_cancer	FGF1	16.6743	3.6074	-2.20896	6.70673e-134	0.988257	1.25616	0.34568	0.214493	0.073	0.406	0.333	4.16147e-11	1.67645e-11	FALSE	0.883118	TRUE	no	yes	FALSE	0
uc003lmn.3	chr5:141971744..142077635,-	BRCA_ctrl	BRCA_cancer	FGF1	16.6743	3.6074	-2.20896	6.70673e-134	10.3488	1.10776	-3.22305	1.35363e-22	0.569	0.21	-0.359	1.67645e-11	1.67645e-11	FALSE	0.882578	TRUE	no	yes	FALSE	0
uc003lmq.2	chr5:141971744..142077635,-	BRCA_ctrl	BRCA_cancer	FGF1	16.6743	3.6074	-2.20896	6.70673e-134	1.52135	0.378122	-2.00658	2.26313e-14	0.109	0.106	-0.002	1	1.67645e-11	FALSE	0.881821	TRUE	no	yes	FALSE	0
uc011dbi.1	chr5:141971744..142077635,-	BRCA_ctrl	BRCA_cancer	FGF1	16.6743	3.6074	-2.20896	6.70673e-134	2.28247	0.374107	-2.6073	7.92339e-25	0.143	0.141	-0.002	1	1.67645e-11	FALSE	0.0639345	FALSE	no	yes	FALSE	0
uc003lnq.1	chr5:145138582..145214899,-	BRCA_ctrl	BRCA_cancer	PRELID2	1.64066	1.3903	-0.214554	0.00556453	1.37208	0.913537	-0.586849	1.11566e-09	0.83	0.655	-0.176	4.46822e-10	4.46822e-10	FALSE	0.860259	TRUE	no	yes	NA	0
uc011dbl.1	chr5:145316126..145461336,+	BRCA_ctrl	BRCA_cancer	SH3RF2	3.85956	1.77083	-1.46211	6.53358e-29	2.2651	0.660073	-1.77828	1.89334e-37	0.579	0.36	-0.219	1.72919e-11	1.72919e-11	FALSE	1	TRUE	no	yes	NA	0
uc003lpy.2	chr5:148521054..148639999,+	BRCA_ctrl	BRCA_cancer	ABLIM3	27.7388	9.45859	-1.57513	2.65276e-41	2.23566	0.897879	-1.31544	5.12921e-19	0.087	0.096	0.009	1	4.86979e-14	FALSE	1	TRUE	no	yes	FALSE	0
uc003lqb.2	chr5:148521054..148639999,+	BRCA_ctrl	BRCA_cancer	ABLIM3	27.7388	9.45859	-1.57513	2.65276e-41	3.05299	0.999102	-1.61055	1.06535e-21	0.109	0.092	-0.017	1	4.86979e-14	FALSE	1	TRUE	no	yes	FALSE	1
uc003lqd.1	chr5:148521054..148639999,+	BRCA_ctrl	BRCA_cancer	ABLIM3	27.7388	9.45859	-1.57513	2.65276e-41	14.7568	2.52743	-2.54533	6.50995e-62	0.516	0.288	-0.228	4.86979e-14	4.86979e-14	FALSE	1	TRUE	no	yes	FALSE	0
uc003lqe.1	chr5:148521054..148639999,+	BRCA_ctrl	BRCA_cancer	ABLIM3	27.7388	9.45859	-1.57513	2.65276e-41	6.82604	4.61743	-0.563852	0.000446725	0.264	0.471	0.207	3.91344e-12	4.86979e-14	FALSE	1	TRUE	no	yes	FALSE	0
uc003ltl.1	chr5:150480268..150537367,-	BRCA_ctrl	BRCA_cancer	ANXA6	141.596	94.8919	-0.583252	2.17469e-20	100.46	39.3507	-1.35212	6.62312e-71	0.64	0.427	-0.214	4.31747e-12	3.9944e-12	FALSE	1	TRUE	no	yes	FALSE	0
uc003ltm.1	chr5:150480268..150537367,-	BRCA_ctrl	BRCA_cancer	ANXA6	141.596	94.8919	-0.583252	2.17469e-20	40.9793	53.8817	0.394905	5.95881e-06	0.358	0.555	0.197	3.9944e-12	3.9944e-12	FALSE	1	TRUE	no	yes	FALSE	0
uc003lvq.2	chr5:154198054..154230213,-	BRCA_ctrl	BRCA_cancer	C5orf4	38.7453	9.39576	-2.12287	4.34168e-75	4.20451	1.69617	-1.30923	4.12163e-12	0.111	0.182	0.071	1	9.06713e-07	NA	0.00399446	FALSE	NA	NA	NA	0
uc003lvs.3	chr5:154198054..154230213,-	BRCA_ctrl	BRCA_cancer	C5orf4	38.7453	9.39576	-2.12287	4.34168e-75	32.7617	6.08044	-2.4296	2.3623e-37	0.841	0.599	-0.243	9.06713e-07	9.06713e-07	FALSE	0.999581	TRUE	no	yes	NA	1
uc003mau.2	chr5:170210723..170241048,+	BRCA_ctrl	BRCA_cancer	GABRP	93.9601	49.0672	-0.952665	0.00022799	71.244	28.1735	-1.33841	1.13643e-06	0.746	0.604	-0.141	0.00255488	0.00255488	FALSE	0.999984	TRUE	yes	yes	TRUE	0
uc011dev.1	chr5:170210723..170241048,+	BRCA_ctrl	BRCA_cancer	GABRP	93.9601	49.0672	-0.952665	0.00022799	22.7161	20.8938	-0.120647	0.776748	0.254	0.396	0.141	0.00255488	0.00255488	FALSE	0.995225	TRUE	yes	yes	TRUE	0
uc003mgb.2	chr5:176732501..176739292,-	BRCA_ctrl	BRCA_cancer	MXD3	1.94997	5.81611	1.37347	3.20368e-46	0.571496	3.15376	2.46072	5.35934e-34	0.236	0.478	0.243	4.17384e-10	1.74072e-10	FALSE	0.998415	TRUE	no	yes	FALSE	0
uc010jkk.2	chr5:176732501..176739292,-	BRCA_ctrl	BRCA_cancer	MXD3	1.94997	5.81611	1.37347	3.20368e-46	1.06836	1.83714	0.780161	4.82079e-25	0.585	0.381	-0.204	1.74072e-10	1.74072e-10	FALSE	0.992839	TRUE	no	yes	FALSE	0
uc003mhs.3	chr5:176946791..176981538,-	BRCA_ctrl	BRCA_cancer	FAM193B	11.9889	10.8581	-0.194205	0.00523868	3.47113	3.02711	-0.197554	0.00663108	0.291	0.295	0.003	1	4.34457e-17	FALSE	1	TRUE	no	no	TRUE	0
uc003mhu.2	chr5:176946791..176981538,-	BRCA_ctrl	BRCA_cancer	FAM193B	11.9889	10.8581	-0.194205	0.00523868	4.34588	5.10356	0.231441	0.0091672	0.36	0.466	0.106	1	4.34457e-17	FALSE	0.999996	TRUE	no	no	TRUE	0
uc003mhv.2	chr5:176946791..176981538,-	BRCA_ctrl	BRCA_cancer	FAM193B	11.9889	10.8581	-0.194205	0.00523868	3.29785	1.36565	-1.27146	1.75992e-55	0.277	0.134	-0.143	4.34457e-17	4.34457e-17	FALSE	0.999991	TRUE	no	no	TRUE	0
uc003mjf.1	chr5:178029665..178057616,-	BRCA_ctrl	BRCA_cancer	CLK4	13.5437	7.50683	-0.843261	8.86223e-52	5.19958	3.95914	-0.393273	7.40475e-10	0.391	0.546	0.155	5.94627e-12	5.94627e-12	FALSE	0.999982	TRUE	no	yes	NA	0
uc003mjg.1	chr5:178029665..178057616,-	BRCA_ctrl	BRCA_cancer	CLK4	13.5437	7.50683	-0.843261	8.86223e-52	1.30702	0.4034	-1.6939	2.00599e-36	0.096	0.052	-0.044	1	5.94627e-12	FALSE	0.999944	TRUE	no	yes	NA	0
uc003mjh.1	chr5:178029665..178057616,-	BRCA_ctrl	BRCA_cancer	CLK4	13.5437	7.50683	-0.843261	8.86223e-52	2.52021	1.23766	-1.02548	1.29267e-22	0.184	0.155	-0.029	1	5.94627e-12	FALSE	0.991433	TRUE	no	yes	NA	1
uc011dgh.1	chr5:178029665..178057616,-	BRCA_ctrl	BRCA_cancer	CLK4	13.5437	7.50683	-0.843261	8.86223e-52	2.86912	1.01383	-1.49813	1.07378e-50	0.214	0.135	-0.079	1	5.94627e-12	FALSE	0.97056	TRUE	no	yes	NA	0
uc003jia.1	chr5:33527287..33892124,-	BRCA_ctrl	BRCA_cancer	ADAMTS12	4.35478	3.94695	0.46381	0.0028143	1.9607	3.24317	0.726097	0.000356594	0.419	0.697	0.278	4.36379e-17	4.34457e-17	FALSE	1	TRUE	yes	yes	TRUE	0
uc003jib.1	chr5:33527287..33892124,-	BRCA_ctrl	BRCA_cancer	ADAMTS12	4.35478	3.94695	0.46381	0.0028143	2.29104	0.579661	-1.97939	1.0572e-64	0.551	0.247	-0.304	4.34457e-17	4.34457e-17	FALSE	0.909972	TRUE	yes	yes	TRUE	0
uc003jkj.3	chr5:36606457..36688434,+	BRCA_ctrl	BRCA_cancer	SLC1A3	12.2675	4.26891	-1.54548	2.408e-58	8.23014	2.12167	-1.95538	5.62007e-23	0.618	0.413	-0.205	2.59675e-05	2.59675e-05	FALSE	1	TRUE	no	yes	NA	0
uc010iuy.2	chr5:36606457..36688434,+	BRCA_ctrl	BRCA_cancer	SLC1A3	12.2675	4.26891	-1.54548	2.408e-58	3.7989	1.74435	-1.12247	1.54247e-30	0.345	0.445	0.1	1	2.59675e-05	FALSE	0.999999	TRUE	no	yes	NA	0
uc003jlb.1	chr5:38258533..38465581,+	BRCA_ctrl	BRCA_cancer	EGFLAM	16.0195	3.82105	-1.8896	6.75448e-135	2.39012	1.25469	-0.929391	5.73458e-18	0.166	0.357	0.191	1.90969e-15	7.45634e-16	FALSE	1	TRUE	yes	yes	TRUE	0
uc003jlg.1	chr5:38258533..38465581,+	BRCA_ctrl	BRCA_cancer	EGFLAM	16.0195	3.82105	-1.8896	6.75448e-135	13.3379	2.44197	-2.44895	1.3616e-147	0.815	0.592	-0.222	7.45634e-16	7.45634e-16	FALSE	0.866829	TRUE	no	yes	TRUE	0
uc003jmt.2	chr5:42424026..42721925,+	BRCA_ctrl	BRCA_cancer	GHR	39.3727	4.17202	-3.24863	2.88698e-226	34.057	2.80458	-3.60182	1.27914e-113	0.795	0.54	-0.256	0.000523499	0.000523499	FALSE	1	TRUE	yes	yes	TRUE	0
uc011cpq.1	chr5:42424026..42721925,+	BRCA_ctrl	BRCA_cancer	GHR	39.3727	4.17202	-3.24863	2.88698e-226	5.31572	1.36744	-1.95844	6.85866e-29	0.205	0.46	0.256	0.000523499	0.000523499	FALSE	0.999959	TRUE	no	yes	TRUE	0
[truncated: 29,365 more rows]
