# Supplementary material for: The Landscape of Isoform Switches in Human Cancers
Source: Oxford University Press journal article supplement (doi:10.1158/1541-7786.mcr-16-0459), 2017-06-05
Supplement: 15417786mcr160459-sup-175983_2_unknown_upload_4059089_cqgcxd.xlsx [file 15417786mcr160459-sup-175983_2_unknown_upload_4059089_cqgcxd.xlsx]

## Sheet: Sheet1
isoPair	isoformUpregulated	isoformDownregulated	gene_id	gene_name	condition_1	condition_2	featureCompared	isoformsDifferent	switchConsequence
uc001aqr.3,uc001aqu.2	uc001aqu.2	uc001aqr.3	chr1:10093016..10241294,+	UBE4B	THCA_ctrl	THCA_cancer	ORF_seq_similarity	TRUE	ORF is shorter
uc001aqw.3,uc001aqv.3	uc001aqv.3	uc001aqw.3	chr1:10270764..10441659,+	KIF1B	KIRC_ctrl	KIRC_cancer	ORF_seq_similarity	TRUE	ORF is shorter
uc001aqw.3,uc001aqv.3	uc001aqv.3	uc001aqw.3	chr1:10270764..10441659,+	KIF1B	KIRC_ctrl	KIRC_cancer	domains_identified	TRUE	Domain loss
uc001aqv.3,uc001ara.2	uc001ara.2	uc001aqv.3	chr1:10270764..10441659,+	KIF1B	PRAD_ctrl	PRAD_cancer	ORF_seq_similarity	TRUE	ORF is longer
uc001aqv.3,uc001ara.2	uc001ara.2	uc001aqv.3	chr1:10270764..10441659,+	KIF1B	PRAD_ctrl	PRAD_cancer	domains_identified	TRUE	Domain gain
uc001arh.2,uc001are.2	uc001are.2	uc001arh.2	chr1:10490159..10512208,+	APITD1	LUSC_ctrl	LUSC_cancer	ORF_seq_similarity	TRUE	ORF is longer
uc009vmv.2,uc001arn.2	uc001arn.2	uc009vmv.2	chr1:10535003..10690813,+	PEX14	PRAD_ctrl	PRAD_cancer	ORF_seq_similarity	TRUE	ORF is longer
uc009vmv.2,uc001arn.2	uc001arn.2	uc009vmv.2	chr1:10535003..10690813,+	PEX14	PRAD_ctrl	PRAD_cancer	domains_identified	TRUE	Domain gain
uc001aro.2,uc001arp.1	uc001arp.1	uc001aro.2	chr1:10696668..10856707,-	CASZ1	KIRP_ctrl	KIRP_cancer	ORF_seq_similarity	TRUE	ORF is shorter
uc001dvc.3,uc001dvd.1	uc001dvd.1	uc001dvc.3	chr1:107682629..108024471,+	NTNG1	PRAD_ctrl	PRAD_cancer	ORF_seq_similarity	TRUE	ORF is shorter
uc001dvk.1,uc001dvj.1	uc001dvj.1	uc001dvk.1	chr1:108113782..108507545,-	VAV3	LUSC_ctrl	LUSC_cancer	ORF_seq_similarity	TRUE	ORF is shorter
uc001dvk.1,uc001dvj.1	uc001dvj.1	uc001dvk.1	chr1:108113782..108507545,-	VAV3	LUSC_ctrl	LUSC_cancer	domains_identified	TRUE	Domain loss
uc001dvk.1,uc010ouv.1	uc010ouv.1	uc001dvk.1	chr1:108113782..108507545,-	VAV3	LUSC_ctrl	LUSC_cancer	ORF_seq_similarity	TRUE	ORF is shorter
uc001dvk.1,uc010ouv.1	uc010ouv.1	uc001dvk.1	chr1:108113782..108507545,-	VAV3	LUSC_ctrl	LUSC_cancer	domains_identified	TRUE	Domain loss
uc001dvk.1,uc010ouv.1	uc010ouv.1	uc001dvk.1	chr1:108113782..108507545,-	VAV3	THCA_ctrl	THCA_cancer	ORF_seq_similarity	TRUE	ORF is shorter
uc001dvk.1,uc010ouv.1	uc010ouv.1	uc001dvk.1	chr1:108113782..108507545,-	VAV3	THCA_ctrl	THCA_cancer	domains_identified	TRUE	Domain loss
uc009wes.1,uc001dwe.1	uc001dwe.1	uc009wes.1	chr1:109472130..109506111,-	CLCC1	KICH_ctrl	KICH_cancer	ORF_seq_similarity	TRUE	ORF is longer
uc009wes.1,uc001dwe.1	uc001dwe.1	uc009wes.1	chr1:109472130..109506111,-	CLCC1	KICH_ctrl	KICH_cancer	domains_identified	TRUE	Domain loss
uc010ovn.1,uc001dxu.2	uc001dxu.2	uc010ovn.1	chr1:110036658..110043062,+	CYB561D1	KICH_ctrl	KICH_cancer	ORF_seq_similarity	TRUE	ORF is shorter
uc010ovn.1,uc001dxu.2	uc001dxu.2	uc010ovn.1	chr1:110036658..110043062,+	CYB561D1	KICH_ctrl	KICH_cancer	domains_identified	TRUE	Domain loss
uc001dza.1,uc001dyz.1	uc001dyz.1	uc001dza.1	chr1:110574199..110597424,+	FAM40A	COAD_ctrl	COAD_cancer	ORF_seq_similarity	TRUE	ORF is shorter
uc001dzo.1,uc001dzq.1	uc001dzq.1	uc001dzo.1	chr1:110905505..110933636,-	SLC16A4	KICH_ctrl	KICH_cancer	ORF_seq_similarity	TRUE	ORF is shorter
uc001dzo.1,uc001dzq.1	uc001dzq.1	uc001dzo.1	chr1:110905505..110933636,-	SLC16A4	KICH_ctrl	KICH_cancer	domains_identified	TRUE	Domain gain
uc001arz.1,uc001ary.1	uc001ary.1	uc001arz.1	chr1:11114649..11120091,-	SRM	KIRP_ctrl	KIRP_cancer	ORF_seq_similarity	TRUE	ORF is shorter
uc001asd.2,uc001asc.2	uc001asc.2	uc001asd.2	chr1:11166589..11322608,-	MTOR	THCA_ctrl	THCA_cancer	ORF_seq_similarity	TRUE	ORF is shorter
uc001asd.2,uc001asc.2	uc001asc.2	uc001asd.2	chr1:11166589..11322608,-	MTOR	THCA_ctrl	THCA_cancer	domains_identified	TRUE	Domain loss
uc001eai.1,uc009wfz.1	uc009wfz.1	uc001eai.1	chr1:111682249..111727724,+	CEPT1	KICH_ctrl	KICH_cancer	coding_potential	TRUE	Transcript is Noncoding
uc001eai.1,uc009wfz.1	uc009wfz.1	uc001eai.1	chr1:111682249..111727724,+	CEPT1	KICH_ctrl	KICH_cancer	ORF_seq_similarity	TRUE	ORF is shorter
uc001eai.1,uc009wfz.1	uc009wfz.1	uc001eai.1	chr1:111682249..111727724,+	CEPT1	KICH_ctrl	KICH_cancer	domains_identified	TRUE	Domain loss
uc001eai.1,uc009wfz.1	uc009wfz.1	uc001eai.1	chr1:111682249..111727724,+	CEPT1	KIRP_ctrl	KIRP_cancer	coding_potential	TRUE	Transcript is Noncoding
uc001eai.1,uc009wfz.1	uc009wfz.1	uc001eai.1	chr1:111682249..111727724,+	CEPT1	KIRP_ctrl	KIRP_cancer	ORF_seq_similarity	TRUE	ORF is shorter
uc001eai.1,uc009wfz.1	uc009wfz.1	uc001eai.1	chr1:111682249..111727724,+	CEPT1	KIRP_ctrl	KIRP_cancer	domains_identified	TRUE	Domain loss
uc001eai.1,uc009wfz.1	uc009wfz.1	uc001eai.1	chr1:111682249..111727724,+	CEPT1	STAD_ctrl	STAD_cancer	coding_potential	TRUE	Transcript is Noncoding
uc001eai.1,uc009wfz.1	uc009wfz.1	uc001eai.1	chr1:111682249..111727724,+	CEPT1	STAD_ctrl	STAD_cancer	ORF_seq_similarity	TRUE	ORF is shorter
uc001eai.1,uc009wfz.1	uc009wfz.1	uc001eai.1	chr1:111682249..111727724,+	CEPT1	STAD_ctrl	STAD_cancer	domains_identified	TRUE	Domain loss
uc001eam.2,uc001ean.2	uc001ean.2	uc001eam.2	chr1:111770281..111786060,+	CHI3L2	BRCA_ctrl	BRCA_cancer	signal_peptide_identified	TRUE	Signal peptide loss
uc001eam.2,uc001ean.2	uc001ean.2	uc001eam.2	chr1:111770281..111786060,+	CHI3L2	LUAD_ctrl	LUAD_cancer	signal_peptide_identified	TRUE	Signal peptide loss
uc001eam.2,uc001eao.2	uc001eao.2	uc001eam.2	chr1:111770281..111786060,+	CHI3L2	LUAD_ctrl	LUAD_cancer	ORF_seq_similarity	TRUE	ORF is shorter
uc001eam.2,uc001eao.2	uc001eao.2	uc001eam.2	chr1:111770281..111786060,+	CHI3L2	LUAD_ctrl	LUAD_cancer	signal_peptide_identified	TRUE	Signal peptide loss
uc001eam.2,uc001ean.2	uc001ean.2	uc001eam.2	chr1:111770281..111786060,+	CHI3L2	LUSC_ctrl	LUSC_cancer	signal_peptide_identified	TRUE	Signal peptide loss
uc001eam.2,uc001eao.2	uc001eao.2	uc001eam.2	chr1:111770281..111786060,+	CHI3L2	LUSC_ctrl	LUSC_cancer	ORF_seq_similarity	TRUE	ORF is shorter
uc001eam.2,uc001eao.2	uc001eao.2	uc001eam.2	chr1:111770281..111786060,+	CHI3L2	LUSC_ctrl	LUSC_cancer	signal_peptide_identified	TRUE	Signal peptide loss
uc001ebh.3,uc001ebg.3	uc001ebg.3	uc001ebh.3	chr1:112025971..112106597,-	ADORA3	LUAD_ctrl	LUAD_cancer	ORF_seq_similarity	TRUE	ORF is shorter
uc001ebh.3,uc001ebg.3	uc001ebg.3	uc001ebh.3	chr1:112025971..112106597,-	ADORA3	LUAD_ctrl	LUAD_cancer	domains_identified	TRUE	Domain loss
uc001ebh.3,uc001ebg.3	uc001ebg.3	uc001ebh.3	chr1:112025971..112106597,-	ADORA3	LUSC_ctrl	LUSC_cancer	ORF_seq_similarity	TRUE	ORF is shorter
uc001ebh.3,uc001ebg.3	uc001ebg.3	uc001ebh.3	chr1:112025971..112106597,-	ADORA3	LUSC_ctrl	LUSC_cancer	domains_identified	TRUE	Domain loss
uc001ada.2,uc001adc.2	uc001adc.2	uc001ada.2	chr1:1138889..1142089,-	TNFRSF18	LUSC_ctrl	LUSC_cancer	ORF_seq_similarity	TRUE	ORF is longer
uc001ada.2,uc001adc.2	uc001adc.2	uc001ada.2	chr1:1138889..1142089,-	TNFRSF18	LUSC_ctrl	LUSC_cancer	signal_peptide_identified	TRUE	Signal peptide gain
uc001edk.2,uc009wgo.2	uc009wgo.2	uc001edk.2	chr1:113933475..114228535,+	MAGI3	KIRC_ctrl	KIRC_cancer	ORF_seq_similarity	TRUE	Complete ORF loss
uc001edk.2,uc009wgo.2	uc009wgo.2	uc001edk.2	chr1:113933475..114228535,+	MAGI3	KIRC_ctrl	KIRC_cancer	domains_identified	TRUE	Domain loss
uc001edk.2,uc009wgo.2	uc009wgo.2	uc001edk.2	chr1:113933475..114228535,+	MAGI3	THCA_ctrl	THCA_cancer	ORF_seq_similarity	TRUE	Complete ORF loss
uc001edk.2,uc009wgo.2	uc009wgo.2	uc001edk.2	chr1:113933475..114228535,+	MAGI3	THCA_ctrl	THCA_cancer	domains_identified	TRUE	Domain loss
uc001een.2,uc001eeq.2	uc001eeq.2	uc001een.2	chr1:114471996..114520421,+	HIPK1	THCA_ctrl	THCA_cancer	ORF_seq_similarity	TRUE	ORF is shorter
uc001een.2,uc001eeq.2	uc001eeq.2	uc001een.2	chr1:114471996..114520421,+	HIPK1	THCA_ctrl	THCA_cancer	domains_identified	TRUE	Domain loss
uc001eex.2,uc010owr.1	uc010owr.1	uc001eex.2	chr1:114935401..115053781,-	TRIM33	KICH_ctrl	KICH_cancer	ORF_seq_similarity	TRUE	ORF is shorter
uc001eex.2,uc010owr.1	uc010owr.1	uc001eex.2	chr1:114935401..115053781,-	TRIM33	KICH_ctrl	KICH_cancer	domains_identified	TRUE	Domain loss
uc009wgu.2,uc001efh.3	uc001efh.3	uc009wgu.2	chr1:115247079..115259515,-	NRAS	THCA_ctrl	THCA_cancer	coding_potential	TRUE	Transcript is Noncoding
uc009wgu.2,uc001efh.3	uc001efh.3	uc009wgu.2	chr1:115247079..115259515,-	NRAS	THCA_ctrl	THCA_cancer	ORF_seq_similarity	TRUE	ORF is shorter
uc001asm.2,uc001asn.2	uc001asn.2	uc001asm.2	chr1:11714432..11723383,+	FBXO44	LUSC_ctrl	LUSC_cancer	ORF_seq_similarity	TRUE	ORF is shorter
uc010oxf.1,uc001ehn.2	uc001ehn.2	uc010oxf.1	chr1:119573841..119683295,-	WARS2	LUAD_ctrl	LUAD_cancer	ORF_seq_similarity	TRUE	ORF is longer
uc010oxf.1,uc001ehn.2	uc001ehn.2	uc010oxf.1	chr1:119573841..119683295,-	WARS2	PRAD_ctrl	PRAD_cancer	ORF_seq_similarity	TRUE	ORF is longer
uc001eid.2,uc010oxj.1	uc010oxj.1	uc001eid.2	chr1:120291005..120311518,-	HMGCS2	BRCA_ctrl	BRCA_cancer	domains_identified	TRUE	Domain loss
uc001eid.2,uc001eie.2	uc001eie.2	uc001eid.2	chr1:120291005..120311518,-	HMGCS2	KIRP_ctrl	KIRP_cancer	ORF_seq_similarity	TRUE	ORF is shorter
uc001att.2,uc001atu.2	uc001atu.2	uc001att.2	chr1:12227060..12269276,+	TNFRSF1B	BRCA_ctrl	BRCA_cancer	ORF_seq_similarity	TRUE	ORF is shorter
uc001att.2,uc001atu.2	uc001atu.2	uc001att.2	chr1:12227060..12269276,+	TNFRSF1B	BRCA_ctrl	BRCA_cancer	domains_identified	TRUE	Domain loss
uc001att.2,uc001atu.2	uc001atu.2	uc001att.2	chr1:12227060..12269276,+	TNFRSF1B	BRCA_ctrl	BRCA_cancer	signal_peptide_identified	TRUE	Signal peptide loss
uc001att.2,uc001atu.2	uc001atu.2	uc001att.2	chr1:12227060..12269276,+	TNFRSF1B	COAD_ctrl	COAD_cancer	ORF_seq_similarity	TRUE	ORF is shorter
uc001att.2,uc001atu.2	uc001atu.2	uc001att.2	chr1:12227060..12269276,+	TNFRSF1B	COAD_ctrl	COAD_cancer	domains_identified	TRUE	Domain loss
uc001att.2,uc001atu.2	uc001atu.2	uc001att.2	chr1:12227060..12269276,+	TNFRSF1B	COAD_ctrl	COAD_cancer	signal_peptide_identified	TRUE	Signal peptide loss
uc001att.2,uc001atu.2	uc001atu.2	uc001att.2	chr1:12227060..12269276,+	TNFRSF1B	KICH_ctrl	KICH_cancer	ORF_seq_similarity	TRUE	ORF is shorter
uc001att.2,uc001atu.2	uc001atu.2	uc001att.2	chr1:12227060..12269276,+	TNFRSF1B	KICH_ctrl	KICH_cancer	domains_identified	TRUE	Domain loss
uc001att.2,uc001atu.2	uc001atu.2	uc001att.2	chr1:12227060..12269276,+	TNFRSF1B	KICH_ctrl	KICH_cancer	signal_peptide_identified	TRUE	Signal peptide loss
uc001att.2,uc001atu.2	uc001atu.2	uc001att.2	chr1:12227060..12269276,+	TNFRSF1B	KIRP_ctrl	KIRP_cancer	ORF_seq_similarity	TRUE	ORF is shorter
uc001att.2,uc001atu.2	uc001atu.2	uc001att.2	chr1:12227060..12269276,+	TNFRSF1B	KIRP_ctrl	KIRP_cancer	domains_identified	TRUE	Domain loss
uc001att.2,uc001atu.2	uc001atu.2	uc001att.2	chr1:12227060..12269276,+	TNFRSF1B	KIRP_ctrl	KIRP_cancer	signal_peptide_identified	TRUE	Signal peptide loss
uc001att.2,uc009vnk.2	uc009vnk.2	uc001att.2	chr1:12227060..12269276,+	TNFRSF1B	KIRP_ctrl	KIRP_cancer	ORF_seq_similarity	TRUE	Complete ORF loss
uc001att.2,uc009vnk.2	uc009vnk.2	uc001att.2	chr1:12227060..12269276,+	TNFRSF1B	KIRP_ctrl	KIRP_cancer	domains_identified	TRUE	Domain loss
uc001att.2,uc009vnk.2	uc009vnk.2	uc001att.2	chr1:12227060..12269276,+	TNFRSF1B	KIRP_ctrl	KIRP_cancer	signal_peptide_identified	TRUE	Signal peptide loss
uc001att.2,uc001atu.2	uc001atu.2	uc001att.2	chr1:12227060..12269276,+	TNFRSF1B	LUSC_ctrl	LUSC_cancer	ORF_seq_similarity	TRUE	ORF is shorter
uc001att.2,uc001atu.2	uc001atu.2	uc001att.2	chr1:12227060..12269276,+	TNFRSF1B	LUSC_ctrl	LUSC_cancer	domains_identified	TRUE	Domain loss
uc001att.2,uc001atu.2	uc001atu.2	uc001att.2	chr1:12227060..12269276,+	TNFRSF1B	LUSC_ctrl	LUSC_cancer	signal_peptide_identified	TRUE	Signal peptide loss
uc001auc.2,uc001aub.2	uc001aub.2	uc001auc.2	chr1:12627940..12677820,-	DHRS3	KIRP_ctrl	KIRP_cancer	ORF_seq_similarity	TRUE	ORF is shorter
uc001aer.3,uc002quu.2	uc002quu.2	uc001aer.3	chr1:1270659..1284492,-	DVL1	BRCA_ctrl	BRCA_cancer	ORF_seq_similarity	TRUE	ORF is shorter
uc001aer.3,uc002quu.2	uc002quu.2	uc001aer.3	chr1:1270659..1284492,-	DVL1	BRCA_ctrl	BRCA_cancer	domains_identified	TRUE	Domain loss
uc001aer.3,uc002quu.2	uc002quu.2	uc001aer.3	chr1:1270659..1284492,-	DVL1	LUAD_ctrl	LUAD_cancer	ORF_seq_similarity	TRUE	ORF is shorter
uc001aer.3,uc002quu.2	uc002quu.2	uc001aer.3	chr1:1270659..1284492,-	DVL1	LUAD_ctrl	LUAD_cancer	domains_identified	TRUE	Domain loss
uc001aew.2,uc001aez.2	uc001aez.2	uc001aew.2	chr1:1288072..1297157,-	MXRA8	KICH_ctrl	KICH_cancer	ORF_seq_similarity	TRUE	ORF is shorter
uc001aew.2,uc001aez.2	uc001aez.2	uc001aew.2	chr1:1288072..1297157,-	MXRA8	KICH_ctrl	KICH_cancer	domains_identified	TRUE	Domain loss
uc001afh.2,uc001aff.1	uc001aff.1	uc001afh.2	chr1:1321091..1334718,-	CCNL2	KIRC_ctrl	KIRC_cancer	ORF_seq_similarity	TRUE	ORF is longer
uc001afh.2,uc001aff.1	uc001aff.1	uc001afh.2	chr1:1321091..1334718,-	CCNL2	KIRC_ctrl	KIRC_cancer	NMD_status	TRUE	NMD insensitive
uc001afh.2,uc001aff.1	uc001aff.1	uc001afh.2	chr1:1321091..1334718,-	CCNL2	KIRC_ctrl	KIRC_cancer	domains_identified	TRUE	Domain switch
uc001afi.2,uc001aff.1	uc001aff.1	uc001afi.2	chr1:1321091..1334718,-	CCNL2	KIRC_ctrl	KIRC_cancer	intron_retention	TRUE	Intron retention gain
uc001afi.2,uc001aff.1	uc001aff.1	uc001afi.2	chr1:1321091..1334718,-	CCNL2	KIRC_ctrl	KIRC_cancer	ORF_seq_similarity	TRUE	ORF is shorter
uc001afi.2,uc001aff.1	uc001aff.1	uc001afi.2	chr1:1321091..1334718,-	CCNL2	KIRC_ctrl	KIRC_cancer	domains_identified	TRUE	Domain loss
uc001afi.2,uc001afk.2	uc001afk.2	uc001afi.2	chr1:1321091..1334718,-	CCNL2	KIRC_ctrl	KIRC_cancer	ORF_seq_similarity	TRUE	ORF is shorter
uc001afi.2,uc001afk.2	uc001afk.2	uc001afi.2	chr1:1321091..1334718,-	CCNL2	KIRC_ctrl	KIRC_cancer	NMD_status	TRUE	NMD sensitive
uc001afi.2,uc001afk.2	uc001afk.2	uc001afi.2	chr1:1321091..1334718,-	CCNL2	KIRC_ctrl	KIRC_cancer	domains_identified	TRUE	Domain loss
uc001afq.2,uc001afp.2	uc001afp.2	uc001afq.2	chr1:1353802..1356650,-	LOC441869	BRCA_ctrl	BRCA_cancer	coding_potential	TRUE	Transcript is Noncoding
uc001afq.2,uc001afp.2	uc001afp.2	uc001afq.2	chr1:1353802..1356650,-	LOC441869	BRCA_ctrl	BRCA_cancer	ORF_seq_similarity	TRUE	Complete ORF loss
uc001afq.2,uc001afp.2	uc001afp.2	uc001afq.2	chr1:1353802..1356650,-	LOC441869	KIRP_ctrl	KIRP_cancer	coding_potential	TRUE	Transcript is Noncoding
uc001afq.2,uc001afp.2	uc001afp.2	uc001afq.2	chr1:1353802..1356650,-	LOC441869	KIRP_ctrl	KIRP_cancer	ORF_seq_similarity	TRUE	Complete ORF loss
uc001afq.2,uc001afp.2	uc001afp.2	uc001afq.2	chr1:1353802..1356650,-	LOC441869	THCA_ctrl	THCA_cancer	coding_potential	TRUE	Transcript is Noncoding
uc001afq.2,uc001afp.2	uc001afp.2	uc001afq.2	chr1:1353802..1356650,-	LOC441869	THCA_ctrl	THCA_cancer	ORF_seq_similarity	TRUE	Complete ORF loss
uc001avk.2,uc009voe.2	uc009voe.2	uc001avk.2	chr1:14026735..14151572,+	PRDM2	KICH_ctrl	KICH_cancer	coding_potential	TRUE	Transcript is Noncoding
uc001avk.2,uc009voe.2	uc009voe.2	uc001avk.2	chr1:14026735..14151572,+	PRDM2	KICH_ctrl	KICH_cancer	ORF_seq_similarity	TRUE	Complete ORF loss
uc001avk.2,uc009voe.2	uc009voe.2	uc001avk.2	chr1:14026735..14151572,+	PRDM2	KICH_ctrl	KICH_cancer	domains_identified	TRUE	Domain loss
uc001avk.2,uc009voe.2	uc009voe.2	uc001avk.2	chr1:14026735..14151572,+	PRDM2	KIRC_ctrl	KIRC_cancer	coding_potential	TRUE	Transcript is Noncoding
uc001avk.2,uc009voe.2	uc009voe.2	uc001avk.2	chr1:14026735..14151572,+	PRDM2	KIRC_ctrl	KIRC_cancer	ORF_seq_similarity	TRUE	Complete ORF loss
uc001avk.2,uc009voe.2	uc009voe.2	uc001avk.2	chr1:14026735..14151572,+	PRDM2	KIRC_ctrl	KIRC_cancer	domains_identified	TRUE	Domain loss
uc001avk.2,uc001avj.2	uc001avj.2	uc001avk.2	chr1:14026735..14151572,+	PRDM2	THCA_ctrl	THCA_cancer	coding_potential	TRUE	Transcript is Noncoding
uc001avk.2,uc001avj.2	uc001avj.2	uc001avk.2	chr1:14026735..14151572,+	PRDM2	THCA_ctrl	THCA_cancer	ORF_seq_similarity	TRUE	Complete ORF loss
uc001avk.2,uc001avj.2	uc001avj.2	uc001avk.2	chr1:14026735..14151572,+	PRDM2	THCA_ctrl	THCA_cancer	domains_identified	TRUE	Domain loss
uc001ekt.3,uc001ekr.3	uc001ekr.3	uc001ekt.3	chr1:144300514..144340773,-	LOC728855	COAD_ctrl	COAD_cancer	intron_retention	TRUE	Intron retention loss
uc001eln.3,uc001emf.1	uc001emf.1	uc001eln.3	chr1:144676873..145076079,-	PDE4DIP	LUAD_ctrl	LUAD_cancer	ORF_seq_similarity	TRUE	ORF is longer
uc001eln.3,uc001emf.1	uc001emf.1	uc001eln.3	chr1:144676873..145076079,-	PDE4DIP	LUAD_ctrl	LUAD_cancer	domains_identified	TRUE	Domain loss
uc001eln.3,uc001emf.1	uc001emf.1	uc001eln.3	chr1:144676873..145076079,-	PDE4DIP	STAD_ctrl	STAD_cancer	ORF_seq_similarity	TRUE	ORF is longer
uc001eln.3,uc001emf.1	uc001emf.1	uc001eln.3	chr1:144676873..145076079,-	PDE4DIP	STAD_ctrl	STAD_cancer	domains_identified	TRUE	Domain loss
uc001aga.1,uc001agb.1	uc001agb.1	uc001aga.1	chr1:1447555..1470064,+	ATAD3A	KIRC_ctrl	KIRC_cancer	ORF_seq_similarity	TRUE	ORF is shorter
uc001enn.3,uc001enm.1	uc001enm.1	uc001enn.3	chr1:145438462..145442626,+	TXNIP	KICH_ctrl	KICH_cancer	coding_potential	TRUE	Transcript is Noncoding
uc001enn.3,uc001enm.1	uc001enm.1	uc001enn.3	chr1:145438462..145442626,+	TXNIP	KICH_ctrl	KICH_cancer	ORF_seq_similarity	TRUE	Complete ORF loss
uc001enn.3,uc001enm.1	uc001enm.1	uc001enn.3	chr1:145438462..145442626,+	TXNIP	KICH_ctrl	KICH_cancer	domains_identified	TRUE	Domain loss
uc001enn.3,uc001enm.1	uc001enm.1	uc001enn.3	chr1:145438462..145442626,+	TXNIP	KIRC_ctrl	KIRC_cancer	coding_potential	TRUE	Transcript is Noncoding
uc001enn.3,uc001enm.1	uc001enm.1	uc001enn.3	chr1:145438462..145442626,+	TXNIP	KIRC_ctrl	KIRC_cancer	ORF_seq_similarity	TRUE	Complete ORF loss
uc001enn.3,uc001enm.1	uc001enm.1	uc001enn.3	chr1:145438462..145442626,+	TXNIP	KIRC_ctrl	KIRC_cancer	domains_identified	TRUE	Domain loss
uc001enn.3,uc001enm.1	uc001enm.1	uc001enn.3	chr1:145438462..145442626,+	TXNIP	KIRP_ctrl	KIRP_cancer	coding_potential	TRUE	Transcript is Noncoding
uc001enn.3,uc001enm.1	uc001enm.1	uc001enn.3	chr1:145438462..145442626,+	TXNIP	KIRP_ctrl	KIRP_cancer	ORF_seq_similarity	TRUE	Complete ORF loss
uc001enn.3,uc001enm.1	uc001enm.1	uc001enn.3	chr1:145438462..145442626,+	TXNIP	KIRP_ctrl	KIRP_cancer	domains_identified	TRUE	Domain loss
uc001enn.3,uc001enm.1	uc001enm.1	uc001enn.3	chr1:145438462..145442626,+	TXNIP	THCA_ctrl	THCA_cancer	coding_potential	TRUE	Transcript is Noncoding
uc001enn.3,uc001enm.1	uc001enm.1	uc001enn.3	chr1:145438462..145442626,+	TXNIP	THCA_ctrl	THCA_cancer	ORF_seq_similarity	TRUE	Complete ORF loss
uc001enn.3,uc001enm.1	uc001enm.1	uc001enn.3	chr1:145438462..145442626,+	TXNIP	THCA_ctrl	THCA_cancer	domains_identified	TRUE	Domain loss
uc001eok.2,uc001eoj.2	uc001eoj.2	uc001eok.2	chr1:145611036..145688774,+	RNF115	LIHC_ctrl	LIHC_cancer	ORF_seq_similarity	TRUE	ORF is longer
uc001eok.2,uc001eoj.2	uc001eoj.2	uc001eok.2	chr1:145611036..145688774,+	RNF115	LIHC_ctrl	LIHC_cancer	domains_identified	TRUE	Domain gain
uc010ozm.1,uc010ozn.1	uc010ozn.1	uc010ozm.1	chr1:146626687..146644129,-	PRKAB2	KICH_ctrl	KICH_cancer	coding_potential	TRUE	Transcript is Noncoding
uc010ozm.1,uc010ozn.1	uc010ozn.1	uc010ozm.1	chr1:146626687..146644129,-	PRKAB2	KICH_ctrl	KICH_cancer	ORF_seq_similarity	TRUE	ORF is shorter
uc010ozm.1,uc010ozn.1	uc010ozn.1	uc010ozm.1	chr1:146626687..146644129,-	PRKAB2	KICH_ctrl	KICH_cancer	domains_identified	TRUE	Domain loss
uc001epm.3,uc009wji.2	uc009wji.2	uc001epm.3	chr1:146714291..146767441,+	CHD1L	KIRC_ctrl	KIRC_cancer	ORF_seq_similarity	TRUE	ORF is shorter
uc001epm.3,uc009wji.2	uc009wji.2	uc001epm.3	chr1:146714291..146767441,+	CHD1L	KIRC_ctrl	KIRC_cancer	domains_identified	TRUE	Domain loss
uc001epm.3,uc009wji.2	uc009wji.2	uc001epm.3	chr1:146714291..146767441,+	CHD1L	KIRP_ctrl	KIRP_cancer	ORF_seq_similarity	TRUE	ORF is shorter
uc001epm.3,uc009wji.2	uc009wji.2	uc001epm.3	chr1:146714291..146767441,+	CHD1L	KIRP_ctrl	KIRP_cancer	domains_identified	TRUE	Domain loss
uc001epm.3,uc009wji.2	uc009wji.2	uc001epm.3	chr1:146714291..146767441,+	CHD1L	STAD_ctrl	STAD_cancer	ORF_seq_similarity	TRUE	ORF is shorter
uc001epm.3,uc009wji.2	uc009wji.2	uc001epm.3	chr1:146714291..146767441,+	CHD1L	STAD_ctrl	STAD_cancer	domains_identified	TRUE	Domain loss
uc001avq.2,uc001avr.2	uc001avr.2	uc001avq.2	chr1:14925213..15444543,+	KAZ	LUAD_ctrl	LUAD_cancer	ORF_seq_similarity	TRUE	ORF is shorter
uc001avq.2,uc001avr.2	uc001avr.2	uc001avq.2	chr1:14925213..15444543,+	KAZ	LUSC_ctrl	LUSC_cancer	ORF_seq_similarity	TRUE	ORF is shorter
uc001etg.2,uc009wlk.2	uc009wlk.2	uc001etg.2	chr1:149874876..149889434,-	SV2A	THCA_ctrl	THCA_cancer	ORF_seq_similarity	TRUE	ORF is shorter
uc001etg.2,uc009wlk.2	uc009wlk.2	uc001etg.2	chr1:149874876..149889434,-	SV2A	THCA_ctrl	THCA_cancer	domains_identified	TRUE	Domain loss
uc001etp.2,uc001etq.2	uc001etq.2	uc001etp.2	chr1:150039342..150117504,+	VPS45	KICH_ctrl	KICH_cancer	intron_retention	TRUE	Intron retention gain
uc001etp.2,uc001etq.2	uc001etq.2	uc001etp.2	chr1:150039342..150117504,+	VPS45	KICH_ctrl	KICH_cancer	ORF_seq_similarity	TRUE	ORF is shorter
uc001etp.2,uc001etq.2	uc001etq.2	uc001etp.2	chr1:150039342..150117504,+	VPS45	KIRP_ctrl	KIRP_cancer	intron_retention	TRUE	Intron retention gain
uc001etp.2,uc001etq.2	uc001etq.2	uc001etp.2	chr1:150039342..150117504,+	VPS45	KIRP_ctrl	KIRP_cancer	ORF_seq_similarity	TRUE	ORF is shorter
uc001etp.2,uc001etq.2	uc001etq.2	uc001etp.2	chr1:150039342..150117504,+	VPS45	STAD_ctrl	STAD_cancer	intron_retention	TRUE	Intron retention gain
uc001etp.2,uc001etq.2	uc001etq.2	uc001etp.2	chr1:150039342..150117504,+	VPS45	STAD_ctrl	STAD_cancer	ORF_seq_similarity	TRUE	ORF is shorter
uc001etz.1,uc010pby.1	uc010pby.1	uc001etz.1	chr1:150237799..150241532,-	APH1A	LUSC_ctrl	LUSC_cancer	ORF_seq_similarity	TRUE	ORF is shorter
uc001etz.1,uc010pby.1	uc010pby.1	uc001etz.1	chr1:150237799..150241532,-	APH1A	LUSC_ctrl	LUSC_cancer	domains_identified	TRUE	Domain gain
uc010pca.1,uc001eum.3	uc001eum.3	uc010pca.1	chr1:150293928..150325703,+	PRPF3	LIHC_ctrl	LIHC_cancer	domains_identified	TRUE	Domain gain
uc001eur.2,uc001euq.2	uc001euq.2	uc001eur.2	chr1:150459920..150479747,+	TARS2	KICH_ctrl	KICH_cancer	ORF_seq_similarity	TRUE	ORF is longer
uc001eur.2,uc001euq.2	uc001euq.2	uc001eur.2	chr1:150459920..150479747,+	TARS2	LUSC_ctrl	LUSC_cancer	ORF_seq_similarity	TRUE	ORF is longer
uc001eut.2,uc001eus.2	uc001eus.2	uc001eut.2	chr1:150480487..150486264,+	ECM1	HNSC_ctrl	HNSC_cancer	ORF_seq_similarity	TRUE	ORF is longer
uc001eut.2,uc001eus.2	uc001eus.2	uc001eut.2	chr1:150480487..150486264,+	ECM1	HNSC_ctrl	HNSC_cancer	domains_identified	TRUE	Domain loss
uc001eux.2,uc009wlx.2	uc009wlx.2	uc001eux.2	chr1:150521898..150533410,+	ADAMTSL4	COAD_ctrl	COAD_cancer	ORF_seq_similarity	TRUE	ORF is shorter
uc001eux.2,uc009wlx.2	uc009wlx.2	uc001eux.2	chr1:150521898..150533410,+	ADAMTSL4	COAD_ctrl	COAD_cancer	domains_identified	TRUE	Domain loss
uc001eux.2,uc009wlx.2	uc009wlx.2	uc001eux.2	chr1:150521898..150533410,+	ADAMTSL4	COAD_ctrl	COAD_cancer	signal_peptide_identified	TRUE	Signal peptide loss
uc001eux.2,uc009wlx.2	uc009wlx.2	uc001eux.2	chr1:150521898..150533410,+	ADAMTSL4	STAD_ctrl	STAD_cancer	ORF_seq_similarity	TRUE	ORF is shorter
uc001eux.2,uc009wlx.2	uc009wlx.2	uc001eux.2	chr1:150521898..150533410,+	ADAMTSL4	STAD_ctrl	STAD_cancer	domains_identified	TRUE	Domain loss
uc001eux.2,uc009wlx.2	uc009wlx.2	uc001eux.2	chr1:150521898..150533410,+	ADAMTSL4	STAD_ctrl	STAD_cancer	signal_peptide_identified	TRUE	Signal peptide loss
uc001evr.1,uc010pck.1	uc010pck.1	uc001evr.1	chr1:150782186..150849186,-	ARNT	PRAD_ctrl	PRAD_cancer	ORF_seq_similarity	TRUE	ORF is shorter
uc001evr.1,uc010pck.1	uc010pck.1	uc001evr.1	chr1:150782186..150849186,-	ARNT	PRAD_ctrl	PRAD_cancer	domains_identified	TRUE	Domain loss
uc001exr.2,uc010pcw.1	uc010pcw.1	uc001exr.2	chr1:151264413..151300133,-	PI4KB	COAD_ctrl	COAD_cancer	ORF_seq_similarity	TRUE	ORF is shorter
uc001exr.2,uc010pcw.1	uc010pcw.1	uc001exr.2	chr1:151264413..151300133,-	PI4KB	KIRP_ctrl	KIRP_cancer	ORF_seq_similarity	TRUE	ORF is shorter
uc009wmw.2,uc010pde.1	uc010pde.1	uc009wmw.2	chr1:151483862..151511165,+	CGN	COAD_ctrl	COAD_cancer	ORF_seq_similarity	TRUE	ORF is shorter
uc009wmw.2,uc010pde.1	uc010pde.1	uc009wmw.2	chr1:151483862..151511165,+	CGN	KIRC_ctrl	KIRC_cancer	ORF_seq_similarity	TRUE	ORF is shorter
uc009wmw.2,uc010pde.1	uc010pde.1	uc009wmw.2	chr1:151483862..151511165,+	CGN	THCA_ctrl	THCA_cancer	ORF_seq_similarity	TRUE	ORF is shorter
uc001eyn.1,uc001eyo.2	uc001eyo.2	uc001eyn.1	chr1:151584662..151671559,+	SNX27	STAD_ctrl	STAD_cancer	ORF_seq_similarity	TRUE	ORF is shorter
uc001eyn.1,uc001eyo.2	uc001eyo.2	uc001eyn.1	chr1:151584662..151671559,+	SNX27	STAD_ctrl	STAD_cancer	domains_identified	TRUE	Domain loss
uc001ezk.1,uc001ezj.1	uc001ezj.1	uc001ezk.1	chr1:151846060..151882113,-	THEM4	BRCA_ctrl	BRCA_cancer	ORF_seq_similarity	TRUE	Complete ORF gain
uc001ezk.1,uc001ezj.1	uc001ezj.1	uc001ezk.1	chr1:151846060..151882113,-	THEM4	BRCA_ctrl	BRCA_cancer	domains_identified	TRUE	Domain gain
uc009woa.2,uc001fbd.2	uc001fbd.2	uc009woa.2	chr1:153028597..153113969,-	SPRR2A	LUSC_ctrl	LUSC_cancer	ORF_seq_similarity	TRUE	Complete ORF gain
uc009woa.2,uc001fbd.2	uc001fbd.2	uc009woa.2	chr1:153028597..153113969,-	SPRR2A	LUSC_ctrl	LUSC_cancer	domains_identified	TRUE	Domain gain
uc001fck.1,uc001fcl.1	uc001fcl.1	uc001fck.1	chr1:153600873..153604513,+	S100A1	HNSC_ctrl	HNSC_cancer	ORF_seq_similarity	TRUE	Complete ORF loss
uc001fck.1,uc001fcl.1	uc001fcl.1	uc001fck.1	chr1:153600873..153604513,+	S100A1	HNSC_ctrl	HNSC_cancer	domains_identified	TRUE	Domain loss
uc001fck.1,uc001fcl.1	uc001fcl.1	uc001fck.1	chr1:153600873..153604513,+	S100A1	KICH_ctrl	KICH_cancer	ORF_seq_similarity	TRUE	Complete ORF loss
uc001fck.1,uc001fcl.1	uc001fcl.1	uc001fck.1	chr1:153600873..153604513,+	S100A1	KICH_ctrl	KICH_cancer	domains_identified	TRUE	Domain loss
uc001fck.1,uc001fcl.1	uc001fcl.1	uc001fck.1	chr1:153600873..153604513,+	S100A1	PRAD_ctrl	PRAD_cancer	ORF_seq_similarity	TRUE	Complete ORF loss
uc001fck.1,uc001fcl.1	uc001fcl.1	uc001fck.1	chr1:153600873..153604513,+	S100A1	PRAD_ctrl	PRAD_cancer	domains_identified	TRUE	Domain loss
uc001fcs.3,uc010pea.1	uc010pea.1	uc001fcs.3	chr1:153651164..153666467,+	NPR1	KIRP_ctrl	KIRP_cancer	ORF_seq_similarity	TRUE	ORF is shorter
uc001fcs.3,uc010pea.1	uc010pea.1	uc001fcs.3	chr1:153651164..153666467,+	NPR1	KIRP_ctrl	KIRP_cancer	domains_identified	TRUE	Domain loss
uc001fcs.3,uc010pea.1	uc010pea.1	uc001fcs.3	chr1:153651164..153666467,+	NPR1	KIRP_ctrl	KIRP_cancer	signal_peptide_identified	TRUE	Signal peptide loss
uc001fct.2,uc010pec.1	uc010pec.1	uc001fct.2	chr1:153700549..153746557,+	INTS3	KIRP_ctrl	KIRP_cancer	intron_retention	TRUE	Intron retention loss
uc001fct.2,uc010pec.1	uc010pec.1	uc001fct.2	chr1:153700549..153746557,+	INTS3	KIRP_ctrl	KIRP_cancer	ORF_seq_similarity	TRUE	ORF is shorter
uc001fct.2,uc010pec.1	uc010pec.1	uc001fct.2	chr1:153700549..153746557,+	INTS3	KIRP_ctrl	KIRP_cancer	domains_identified	TRUE	Domain loss
uc001fec.1,uc009wor.2	uc009wor.2	uc001fec.1	chr1:154127780..154164609,-	TPM3	HNSC_ctrl	HNSC_cancer	coding_potential	TRUE	Transcript is Noncoding
uc001fec.1,uc009wor.2	uc009wor.2	uc001fec.1	chr1:154127780..154164609,-	TPM3	HNSC_ctrl	HNSC_cancer	ORF_seq_similarity	TRUE	Complete ORF loss
uc001fec.1,uc009wor.2	uc009wor.2	uc001fec.1	chr1:154127780..154164609,-	TPM3	HNSC_ctrl	HNSC_cancer	domains_identified	TRUE	Domain loss
uc009wot.2,uc001fer.2	uc001fer.2	uc009wot.2	chr1:154192655..154243985,+	UBAP2L	KIRP_ctrl	KIRP_cancer	ORF_seq_similarity	TRUE	ORF is shorter
uc009wot.2,uc001fer.2	uc001fer.2	uc009wot.2	chr1:154192655..154243985,+	UBAP2L	KIRP_ctrl	KIRP_cancer	domains_identified	TRUE	Domain loss
uc001ffp.2,uc001ffo.2	uc001ffo.2	uc001ffp.2	chr1:154679917..154842754,-	KCNN3	LUSC_ctrl	LUSC_cancer	ORF_seq_similarity	TRUE	ORF is shorter
uc001ffr.2,uc010pep.1	uc010pep.1	uc001ffr.2	chr1:154916561..154928567,-	PBXIP1	COAD_ctrl	COAD_cancer	ORF_seq_similarity	TRUE	ORF is shorter
uc001ffr.2,uc010pep.1	uc010pep.1	uc001ffr.2	chr1:154916561..154928567,-	PBXIP1	KIRP_ctrl	KIRP_cancer	ORF_seq_similarity	TRUE	ORF is shorter
uc001ffr.2,uc010pep.1	uc010pep.1	uc001ffr.2	chr1:154916561..154928567,-	PBXIP1	STAD_ctrl	STAD_cancer	ORF_seq_similarity	TRUE	ORF is shorter
uc001ffx.2,uc001ffw.2	uc001ffw.2	uc001ffx.2	chr1:154934775..154946959,-	SHC1	KIRC_ctrl	KIRC_cancer	ORF_seq_similarity	TRUE	ORF is longer
uc001fgw.1,uc001fhb.1	uc001fhb.1	uc001fgw.1	chr1:155023422..155035252,+	ADAM15	KIRP_ctrl	KIRP_cancer	coding_potential	TRUE	Transcript is Noncoding
uc001fgw.1,uc001fhb.1	uc001fhb.1	uc001fgw.1	chr1:155023422..155035252,+	ADAM15	KIRP_ctrl	KIRP_cancer	ORF_seq_similarity	TRUE	ORF is shorter
uc001fgw.1,uc001fhb.1	uc001fhb.1	uc001fgw.1	chr1:155023422..155035252,+	ADAM15	KIRP_ctrl	KIRP_cancer	domains_identified	TRUE	Domain loss
uc001fgw.1,uc001fhb.1	uc001fhb.1	uc001fgw.1	chr1:155023422..155035252,+	ADAM15	KIRP_ctrl	KIRP_cancer	signal_peptide_identified	TRUE	Signal peptide loss
uc001fhg.2,uc001fhf.2	uc001fhf.2	uc001fhg.2	chr1:155036213..155060006,+	EFNA3	COAD_ctrl	COAD_cancer	signal_peptide_identified	TRUE	Signal peptide gain
uc001fhg.2,uc001fhf.2	uc001fhf.2	uc001fhg.2	chr1:155036213..155060006,+	EFNA3	STAD_ctrl	STAD_cancer	signal_peptide_identified	TRUE	Signal peptide gain
uc001agl.1,uc001agn.2	uc001agn.2	uc001agl.1	chr1:1550884..1565984,+	MIB2	LUSC_ctrl	LUSC_cancer	ORF_seq_similarity	TRUE	ORF is shorter
uc001agl.1,uc001agn.2	uc001agn.2	uc001agl.1	chr1:1550884..1565984,+	MIB2	LUSC_ctrl	LUSC_cancer	domains_identified	TRUE	Domain loss
uc001agh.2,uc001agn.2	uc001agn.2	uc001agh.2	chr1:1550884..1565984,+	MIB2	STAD_ctrl	STAD_cancer	ORF_seq_similarity	TRUE	ORF is shorter
uc001agh.2,uc001agn.2	uc001agn.2	uc001agh.2	chr1:1550884..1565984,+	MIB2	STAD_ctrl	STAD_cancer	domains_identified	TRUE	Domain loss
uc001agh.2,uc001ago.2	uc001ago.2	uc001agh.2	chr1:1550884..1565984,+	MIB2	STAD_ctrl	STAD_cancer	ORF_seq_similarity	TRUE	ORF is shorter
uc001agh.2,uc001ago.2	uc001ago.2	uc001agh.2	chr1:1550884..1565984,+	MIB2	STAD_ctrl	STAD_cancer	domains_identified	TRUE	Domain loss
uc001flj.2,uc010pgg.1	uc010pgg.1	uc001flj.2	chr1:155629234..155658791,-	YY1AP1	KICH_ctrl	KICH_cancer	ORF_seq_similarity	TRUE	ORF is shorter
uc001fmi.1,uc001fmj.1	uc001fmj.1	uc001fmi.1	chr1:155882836..155904188,-	KIAA0907	KIRC_ctrl	KIRC_cancer	intron_retention	TRUE	Intron retention gain
uc001fnm.2,uc001fnn.2	uc001fnn.2	uc001fnm.2	chr1:156119810..156147534,+	SEMA4A	KICH_ctrl	KICH_cancer	ORF_seq_similarity	TRUE	ORF is shorter
uc001fnm.2,uc001fnn.2	uc001fnn.2	uc001fnm.2	chr1:156119810..156147534,+	SEMA4A	KICH_ctrl	KICH_cancer	signal_peptide_identified	TRUE	Signal peptide loss
uc001fnm.2,uc001fnn.2	uc001fnn.2	uc001fnm.2	chr1:156119810..156147534,+	SEMA4A	KIRC_ctrl	KIRC_cancer	ORF_seq_similarity	TRUE	ORF is shorter
uc001fnm.2,uc001fnn.2	uc001fnn.2	uc001fnm.2	chr1:156119810..156147534,+	SEMA4A	KIRC_ctrl	KIRC_cancer	signal_peptide_identified	TRUE	Signal peptide loss
uc009wrq.2,uc001fnn.2	uc001fnn.2	uc009wrq.2	chr1:156119810..156147534,+	SEMA4A	KIRC_ctrl	KIRC_cancer	ORF_seq_similarity	TRUE	ORF is shorter
uc009wrq.2,uc001fnn.2	uc001fnn.2	uc009wrq.2	chr1:156119810..156147534,+	SEMA4A	KIRC_ctrl	KIRC_cancer	signal_peptide_identified	TRUE	Signal peptide loss
uc001fnm.2,uc001fnn.2	uc001fnn.2	uc001fnm.2	chr1:156119810..156147534,+	SEMA4A	KIRP_ctrl	KIRP_cancer	ORF_seq_similarity	TRUE	ORF is shorter
uc001fnm.2,uc001fnn.2	uc001fnn.2	uc001fnm.2	chr1:156119810..156147534,+	SEMA4A	KIRP_ctrl	KIRP_cancer	signal_peptide_identified	TRUE	Signal peptide loss
uc009wrq.2,uc001fnn.2	uc001fnn.2	uc009wrq.2	chr1:156119810..156147534,+	SEMA4A	KIRP_ctrl	KIRP_cancer	ORF_seq_similarity	TRUE	ORF is shorter
uc009wrq.2,uc001fnn.2	uc001fnn.2	uc009wrq.2	chr1:156119810..156147534,+	SEMA4A	KIRP_ctrl	KIRP_cancer	signal_peptide_identified	TRUE	Signal peptide loss
uc001fnp.2,uc010phe.1	uc010phe.1	uc001fnp.2	chr1:156163730..156182586,+	SLC25A44	THCA_ctrl	THCA_cancer	coding_potential	TRUE	Transcript is Noncoding
uc001fnp.2,uc010phe.1	uc010phe.1	uc001fnp.2	chr1:156163730..156182586,+	SLC25A44	THCA_ctrl	THCA_cancer	ORF_seq_similarity	TRUE	Complete ORF loss
uc001fnp.2,uc010phe.1	uc010phe.1	uc001fnp.2	chr1:156163730..156182586,+	SLC25A44	THCA_ctrl	THCA_cancer	domains_identified	TRUE	Domain loss
uc001fpy.3,uc009wsd.2	uc009wsd.2	uc001fpy.3	chr1:156711900..156736717,-	HDGF	STAD_ctrl	STAD_cancer	ORF_seq_similarity	TRUE	ORF is shorter
uc001fqj.1,uc001fqk.1	uc001fqk.1	uc001fqj.1	chr1:156863523..156886226,+	PEAR1	BRCA_ctrl	BRCA_cancer	intron_retention	TRUE	Intron retention gain
uc001fqj.1,uc001fqk.1	uc001fqk.1	uc001fqj.1	chr1:156863523..156886226,+	PEAR1	BRCA_ctrl	BRCA_cancer	ORF_seq_similarity	TRUE	ORF is shorter
uc001fqj.1,uc001fqk.1	uc001fqk.1	uc001fqj.1	chr1:156863523..156886226,+	PEAR1	BRCA_ctrl	BRCA_cancer	domains_identified	TRUE	Domain loss
uc001fqj.1,uc001fqk.1	uc001fqk.1	uc001fqj.1	chr1:156863523..156886226,+	PEAR1	BRCA_ctrl	BRCA_cancer	signal_peptide_identified	TRUE	Signal peptide loss
uc001fqj.1,uc001fqk.1	uc001fqk.1	uc001fqj.1	chr1:156863523..156886226,+	PEAR1	LUAD_ctrl	LUAD_cancer	intron_retention	TRUE	Intron retention gain
uc001fqj.1,uc001fqk.1	uc001fqk.1	uc001fqj.1	chr1:156863523..156886226,+	PEAR1	LUAD_ctrl	LUAD_cancer	ORF_seq_similarity	TRUE	ORF is shorter
uc001fqj.1,uc001fqk.1	uc001fqk.1	uc001fqj.1	chr1:156863523..156886226,+	PEAR1	LUAD_ctrl	LUAD_cancer	domains_identified	TRUE	Domain loss
uc001fqj.1,uc001fqk.1	uc001fqk.1	uc001fqj.1	chr1:156863523..156886226,+	PEAR1	LUAD_ctrl	LUAD_cancer	signal_peptide_identified	TRUE	Signal peptide loss
uc001fqj.1,uc001fqk.1	uc001fqk.1	uc001fqj.1	chr1:156863523..156886226,+	PEAR1	LUSC_ctrl	LUSC_cancer	intron_retention	TRUE	Intron retention gain
uc001fqj.1,uc001fqk.1	uc001fqk.1	uc001fqj.1	chr1:156863523..156886226,+	PEAR1	LUSC_ctrl	LUSC_cancer	ORF_seq_similarity	TRUE	ORF is shorter
uc001fqj.1,uc001fqk.1	uc001fqk.1	uc001fqj.1	chr1:156863523..156886226,+	PEAR1	LUSC_ctrl	LUSC_cancer	domains_identified	TRUE	Domain loss
uc001fqj.1,uc001fqk.1	uc001fqk.1	uc001fqj.1	chr1:156863523..156886226,+	PEAR1	LUSC_ctrl	LUSC_cancer	signal_peptide_identified	TRUE	Signal peptide loss
uc001fqo.2,uc010phu.1	uc010phu.1	uc001fqo.2	chr1:156904633..157015162,-	ARHGEF11	KIRC_ctrl	KIRC_cancer	ORF_seq_similarity	TRUE	ORF is shorter
uc001fqo.2,uc010phu.1	uc010phu.1	uc001fqo.2	chr1:156904633..157015162,-	ARHGEF11	KIRC_ctrl	KIRC_cancer	domains_identified	TRUE	Domain loss
uc001awn.2,uc001awq.2	uc001awq.2	uc001awn.2	chr1:15817324..15851384,-	CASP9	COAD_ctrl	COAD_cancer	ORF_seq_similarity	TRUE	ORF is shorter
uc001awn.2,uc001awq.2	uc001awq.2	uc001awn.2	chr1:15817324..15851384,-	CASP9	COAD_ctrl	COAD_cancer	domains_identified	TRUE	Domain loss
uc001aws.2,uc001awt.2	uc001awt.2	uc001aws.2	chr1:15853352..15918872,+	DNAJC16	COAD_ctrl	COAD_cancer	ORF_seq_similarity	TRUE	ORF is shorter
uc001aws.2,uc001awt.2	uc001awt.2	uc001aws.2	chr1:15853352..15918872,+	DNAJC16	COAD_ctrl	COAD_cancer	domains_identified	TRUE	Domain loss
uc001aws.2,uc001awt.2	uc001awt.2	uc001aws.2	chr1:15853352..15918872,+	DNAJC16	COAD_ctrl	COAD_cancer	signal_peptide_identified	TRUE	Signal peptide loss
uc001aws.2,uc001awt.2	uc001awt.2	uc001aws.2	chr1:15853352..15918872,+	DNAJC16	THCA_ctrl	THCA_cancer	ORF_seq_similarity	TRUE	ORF is shorter
uc001aws.2,uc001awt.2	uc001awt.2	uc001aws.2	chr1:15853352..15918872,+	DNAJC16	THCA_ctrl	THCA_cancer	domains_identified	TRUE	Domain loss
uc001aws.2,uc001awt.2	uc001awt.2	uc001aws.2	chr1:15853352..15918872,+	DNAJC16	THCA_ctrl	THCA_cancer	signal_peptide_identified	TRUE	Signal peptide loss
uc001ahg.3,uc001ahe.3	uc001ahe.3	uc001ahg.3	chr1:1590990..1677431,-	SLC35E2	STAD_ctrl	STAD_cancer	intron_retention	TRUE	Intron retention gain
uc001ahg.3,uc001ahe.3	uc001ahe.3	uc001ahg.3	chr1:1590990..1677431,-	SLC35E2	STAD_ctrl	STAD_cancer	ORF_seq_similarity	TRUE	ORF is shorter
uc001ahg.3,uc001ahe.3	uc001ahe.3	uc001ahg.3	chr1:1590990..1677431,-	SLC35E2	STAD_ctrl	STAD_cancer	domains_identified	TRUE	Domain loss
uc001fvt.2,uc001fvs.2	uc001fvs.2	uc001fvt.2	chr1:160246599..160254941,-	PEX19	LUAD_ctrl	LUAD_cancer	ORF_seq_similarity	TRUE	ORF is longer
uc001fvx.2,uc010pjg.1	uc010pjg.1	uc001fvx.2	chr1:160313063..160328741,+	NCSTN	KICH_ctrl	KICH_cancer	ORF_seq_similarity	TRUE	ORF is shorter
uc001fvx.2,uc010pjg.1	uc010pjg.1	uc001fvx.2	chr1:160313063..160328741,+	NCSTN	KICH_ctrl	KICH_cancer	signal_peptide_identified	TRUE	Signal peptide loss
uc001fvx.2,uc010pjg.1	uc010pjg.1	uc001fvx.2	chr1:160313063..160328741,+	NCSTN	KIRP_ctrl	KIRP_cancer	ORF_seq_similarity	TRUE	ORF is shorter
uc001fvx.2,uc010pjg.1	uc010pjg.1	uc001fvx.2	chr1:160313063..160328741,+	NCSTN	KIRP_ctrl	KIRP_cancer	signal_peptide_identified	TRUE	Signal peptide loss
uc001fvx.2,uc010pjg.1	uc010pjg.1	uc001fvx.2	chr1:160313063..160328741,+	NCSTN	STAD_ctrl	STAD_cancer	ORF_seq_similarity	TRUE	ORF is shorter
uc001fvx.2,uc010pjg.1	uc010pjg.1	uc001fvx.2	chr1:160313063..160328741,+	NCSTN	STAD_ctrl	STAD_cancer	signal_peptide_identified	TRUE	Signal peptide loss
uc001axd.1,uc001axi.1	uc001axi.1	uc001axd.1	chr1:16083154..16114431,+	FBLIM1	COAD_ctrl	COAD_cancer	ORF_seq_similarity	TRUE	ORF is shorter
uc001axe.1,uc001axi.1	uc001axi.1	uc001axe.1	chr1:16083154..16114431,+	FBLIM1	KIRP_ctrl	KIRP_cancer	ORF_seq_similarity	TRUE	ORF is shorter
uc009wtt.2,uc010pjw.1	uc010pjw.1	uc009wtt.2	chr1:160965002..161008774,-	F11R	KIRP_ctrl	KIRP_cancer	signal_peptide_identified	TRUE	Signal peptide loss
uc010pjx.1,uc009wtw.2	uc009wtw.2	uc010pjx.1	chr1:161007424..161008774,-	TSTD1	LUSC_ctrl	LUSC_cancer	ORF_seq_similarity	TRUE	ORF is shorter
uc001fxl.2,uc001fxm.2	uc001fxm.2	uc001fxl.2	chr1:161016733..161039760,-	ARHGAP30	LUSC_ctrl	LUSC_cancer	ORF_seq_similarity	TRUE	ORF is shorter
uc001fxl.2,uc001fxm.2	uc001fxm.2	uc001fxl.2	chr1:161016733..161039760,-	ARHGAP30	LUSC_ctrl	LUSC_cancer	domains_identified	TRUE	Domain loss
uc010pke.1,uc010pkc.1	uc010pkc.1	uc010pke.1	chr1:161129254..161135515,+	USP21	STAD_ctrl	STAD_cancer	ORF_seq_similarity	TRUE	ORF is shorter
uc010pkd.1,uc010pkf.1	uc010pkf.1	uc010pkd.1	chr1:161129254..161135515,+	USP21	STAD_ctrl	STAD_cancer	ORF_seq_similarity	TRUE	ORF is longer
uc001fyr.1,uc001fyo.1	uc001fyo.1	uc001fyr.1	chr1:161141101..161147314,-	B4GALT3	KIRP_ctrl	KIRP_cancer	ORF_seq_similarity	TRUE	ORF is shorter
uc001fyr.1,uc001fyo.1	uc001fyo.1	uc001fyr.1	chr1:161141101..161147314,-	B4GALT3	KIRP_ctrl	KIRP_cancer	domains_identified	TRUE	Domain loss
uc001fze.2,uc009wue.2	uc009wue.2	uc001fze.2	chr1:161195833..161213087,+	TOMM40L	KIRP_ctrl	KIRP_cancer	ORF_seq_similarity	TRUE	ORF is shorter
uc009wue.2,uc001fze.2	uc001fze.2	uc009wue.2	chr1:161195833..161213087,+	TOMM40L	LIHC_ctrl	LIHC_cancer	ORF_seq_similarity	TRUE	ORF is longer
uc001fzy.2,uc010pkm.1	uc010pkm.1	uc001fzy.2	chr1:161199458..161208000,-	NR1I3	LIHC_ctrl	LIHC_cancer	ORF_seq_similarity	TRUE	ORF is shorter
uc009wuk.2,uc001gav.2	uc001gav.2	uc009wuk.2	chr1:161551129..161570031,+	FCGR2C	STAD_ctrl	STAD_cancer	intron_retention	TRUE	Intron retention loss
uc009wuk.2,uc001gav.2	uc001gav.2	uc009wuk.2	chr1:161551129..161570031,+	FCGR2C	STAD_ctrl	STAD_cancer	coding_potential	TRUE	Transcript is coding
uc009wuk.2,uc001gav.2	uc001gav.2	uc009wuk.2	chr1:161551129..161570031,+	FCGR2C	STAD_ctrl	STAD_cancer	ORF_seq_similarity	TRUE	Complete ORF gain
uc009wuk.2,uc001gav.2	uc001gav.2	uc009wuk.2	chr1:161551129..161570031,+	FCGR2C	STAD_ctrl	STAD_cancer	domains_identified	TRUE	Domain gain
uc009wuk.2,uc001gav.2	uc001gav.2	uc009wuk.2	chr1:161551129..161570031,+	FCGR2C	STAD_ctrl	STAD_cancer	signal_peptide_identified	TRUE	Signal peptide gain
uc001gbs.2,uc001gbr.2	uc001gbr.2	uc001gbs.2	chr1:161736084..161932960,+	ATF6	LUSC_ctrl	LUSC_cancer	coding_potential	TRUE	Transcript is coding
uc001gbs.2,uc001gbr.2	uc001gbr.2	uc001gbs.2	chr1:161736084..161932960,+	ATF6	LUSC_ctrl	LUSC_cancer	ORF_seq_similarity	TRUE	Complete ORF gain
uc001gbs.2,uc001gbr.2	uc001gbr.2	uc001gbs.2	chr1:161736084..161932960,+	ATF6	LUSC_ctrl	LUSC_cancer	domains_identified	TRUE	Domain gain
uc001axk.1,uc010obp.1	uc010obp.1	uc001axk.1	chr1:16174359..16266950,+	SPEN	THCA_ctrl	THCA_cancer	domains_identified	TRUE	Domain loss
uc001axx.3,uc001axy.3	uc001axy.3	uc001axx.3	chr1:16348486..16383802,+	CLCNKB	KIRC_ctrl	KIRC_cancer	ORF_seq_similarity	TRUE	ORF is shorter
uc001axx.3,uc001axy.3	uc001axy.3	uc001axx.3	chr1:16348486..16383802,+	CLCNKB	KIRP_ctrl	KIRP_cancer	ORF_seq_similarity	TRUE	ORF is shorter
uc001axx.3,uc001axy.3	uc001axy.3	uc001axx.3	chr1:16348486..16383802,+	CLCNKB	THCA_ctrl	THCA_cancer	ORF_seq_similarity	TRUE	ORF is shorter
uc001gct.2,uc010pkv.1	uc010pkv.1	uc001gct.2	chr1:164528802..164854300,+	PBX1	COAD_ctrl	COAD_cancer	ORF_seq_similarity	TRUE	ORF is shorter
uc001ayc.1,uc001ayb.1	uc001ayb.1	uc001ayc.1	chr1:16524599..16539104,-	ARHGEF19	PRAD_ctrl	PRAD_cancer	ORF_seq_similarity	TRUE	ORF is shorter
uc001ayc.1,uc001ayb.1	uc001ayb.1	uc001ayc.1	chr1:16524599..16539104,-	ARHGEF19	PRAD_ctrl	PRAD_cancer	domains_identified	TRUE	Domain loss
uc001gdt.1,uc010plf.1	uc010plf.1	uc001gdt.1	chr1:166808724..166823709,+	POGK	KIRC_ctrl	KIRC_cancer	ORF_seq_similarity	TRUE	ORF is shorter
uc001gdt.1,uc010plf.1	uc010plf.1	uc001gdt.1	chr1:166808724..166823709,+	POGK	KIRC_ctrl	KIRC_cancer	domains_identified	TRUE	Domain loss
uc001gdt.1,uc010plf.1	uc010plf.1	uc001gdt.1	chr1:166808724..166823709,+	POGK	THCA_ctrl	THCA_cancer	ORF_seq_similarity	TRUE	ORF is shorter
uc001gdt.1,uc010plf.1	uc010plf.1	uc001gdt.1	chr1:166808724..166823709,+	POGK	THCA_ctrl	THCA_cancer	domains_identified	TRUE	Domain loss
uc001gew.2,uc001gez.2	uc001gez.2	uc001gew.2	chr1:167905908..168045079,+	DCAF6	KIRP_ctrl	KIRP_cancer	ORF_seq_similarity	TRUE	ORF is shorter
uc001gew.2,uc001gez.2	uc001gez.2	uc001gew.2	chr1:167905908..168045079,+	DCAF6	KIRP_ctrl	KIRP_cancer	domains_identified	TRUE	Domain loss
uc009vos.1,uc001azc.1	uc001azc.1	uc009vos.1	chr1:16890412..16939982,-	NBPF1	LUSC_ctrl	LUSC_cancer	coding_potential	TRUE	Transcript is Noncoding
uc009vos.1,uc001azc.1	uc001azc.1	uc009vos.1	chr1:16890412..16939982,-	NBPF1	LUSC_ctrl	LUSC_cancer	ORF_seq_similarity	TRUE	Complete ORF loss
uc001gge.3,uc001ggf.3	uc001ggf.3	uc001gge.3	chr1:169433151..169455208,-	SLC19A2	KIRC_ctrl	KIRC_cancer	ORF_seq_similarity	TRUE	ORF is shorter
uc001gge.3,uc001ggf.3	uc001ggf.3	uc001gge.3	chr1:169433151..169455208,-	SLC19A2	THCA_ctrl	THCA_cancer	ORF_seq_similarity	TRUE	ORF is shorter
uc001ggi.3,uc001ggh.2	uc001ggh.2	uc001ggi.3	chr1:169558090..169599377,-	SELP	KICH_ctrl	KICH_cancer	ORF_seq_similarity	TRUE	ORF is shorter
uc001ggi.3,uc001ggh.2	uc001ggh.2	uc001ggi.3	chr1:169558090..169599377,-	SELP	KICH_ctrl	KICH_cancer	domains_identified	TRUE	Domain loss
uc001ggk.2,uc010pls.1	uc010pls.1	uc001ggk.2	chr1:169659810..169680837,-	SELL	KICH_ctrl	KICH_cancer	ORF_seq_similarity	TRUE	ORF is shorter
uc001ggk.2,uc010pls.1	uc010pls.1	uc001ggk.2	chr1:169659810..169680837,-	SELL	KICH_ctrl	KICH_cancer	signal_peptide_identified	TRUE	Signal peptide loss
uc001ggv.2,uc010plx.1	uc010plx.1	uc001ggv.2	chr1:169890472..170043879,-	KIFAP3	STAD_ctrl	STAD_cancer	ORF_seq_similarity	TRUE	ORF is shorter
uc009wwd.2,uc010pmn.1	uc010pmn.1	uc009wwd.2	chr1:172502260..172580971,+	C1orf9	KIRC_ctrl	KIRC_cancer	ORF_seq_similarity	TRUE	ORF is shorter
uc009wwd.2,uc010pmn.1	uc010pmn.1	uc009wwd.2	chr1:172502260..172580971,+	C1orf9	KIRP_ctrl	KIRP_cancer	ORF_seq_similarity	TRUE	ORF is shorter
uc009wwd.2,uc010pmn.1	uc010pmn.1	uc009wwd.2	chr1:172502260..172580971,+	C1orf9	THCA_ctrl	THCA_cancer	ORF_seq_similarity	TRUE	ORF is shorter
uc001baf.2,uc010ocm.1	uc010ocm.1	uc001baf.2	chr1:17393257..17445948,-	PADI2	KICH_ctrl	KICH_cancer	ORF_seq_similarity	TRUE	ORF is shorter
uc001baf.2,uc010ocm.1	uc010ocm.1	uc001baf.2	chr1:17393257..17445948,-	PADI2	KICH_ctrl	KICH_cancer	domains_identified	TRUE	Domain loss
uc001baf.2,uc010ocm.1	uc010ocm.1	uc001baf.2	chr1:17393257..17445948,-	PADI2	KIRC_ctrl	KIRC_cancer	ORF_seq_similarity	TRUE	ORF is shorter
uc001baf.2,uc010ocm.1	uc010ocm.1	uc001baf.2	chr1:17393257..17445948,-	PADI2	KIRC_ctrl	KIRC_cancer	domains_identified	TRUE	Domain loss
uc001baf.2,uc010ocm.1	uc010ocm.1	uc001baf.2	chr1:17393257..17445948,-	PADI2	KIRP_ctrl	KIRP_cancer	ORF_seq_similarity	TRUE	ORF is shorter
uc001baf.2,uc010ocm.1	uc010ocm.1	uc001baf.2	chr1:17393257..17445948,-	PADI2	KIRP_ctrl	KIRP_cancer	domains_identified	TRUE	Domain loss
uc001gjx.2,uc001gkh.3	uc001gkh.3	uc001gjx.2	chr1:174128634..174959724,+	RABGAP1L	STAD_ctrl	STAD_cancer	ORF_seq_similarity	TRUE	ORF is shorter
uc001gjx.2,uc001gkh.3	uc001gkh.3	uc001gjx.2	chr1:174128634..174959724,+	RABGAP1L	STAD_ctrl	STAD_cancer	domains_identified	TRUE	Domain loss
uc001gku.1,uc001gkt.1	uc001gkt.1	uc001gku.1	chr1:175913967..176176370,-	RFWD2	STAD_ctrl	STAD_cancer	ORF_seq_similarity	TRUE	ORF is shorter
uc001gku.1,uc001gkt.1	uc001gkt.1	uc001gku.1	chr1:175913967..176176370,-	RFWD2	STAD_ctrl	STAD_cancer	domains_identified	TRUE	Domain gain
uc009wxc.2,uc001glr.2	uc001glr.2	uc009wxc.2	chr1:178062864..178448644,+	RASAL2	LUSC_ctrl	LUSC_cancer	ORF_seq_similarity	TRUE	ORF is longer
uc009wxc.2,uc001glr.2	uc001glr.2	uc009wxc.2	chr1:178062864..178448644,+	RASAL2	LUSC_ctrl	LUSC_cancer	domains_identified	TRUE	Domain gain
uc010ocs.1,uc001bao.2	uc001bao.2	uc010ocs.1	chr1:17866330..18024369,+	ARHGEF10L	LUAD_ctrl	LUAD_cancer	ORF_seq_similarity	TRUE	ORF is longer
uc010ocs.1,uc001bao.2	uc001bao.2	uc010ocs.1	chr1:17866330..18024369,+	ARHGEF10L	LUSC_ctrl	LUSC_cancer	ORF_seq_similarity	TRUE	ORF is longer
uc001gos.1,uc001goq.1	uc001goq.1	uc001gos.1	chr1:181003139..181024633,+	MR1	BRCA_ctrl	BRCA_cancer	ORF_seq_similarity	TRUE	ORF is longer
uc001gos.1,uc001goq.1	uc001goq.1	uc001gos.1	chr1:181003139..181024633,+	MR1	BRCA_ctrl	BRCA_cancer	domains_identified	TRUE	Domain gain
uc001gpr.2,uc009wyd.2	uc009wyd.2	uc001gpr.2	chr1:182808451..182856882,+	DHX9	KIRP_ctrl	KIRP_cancer	intron_retention	TRUE	Intron retention loss
uc001gpr.2,uc009wyd.2	uc009wyd.2	uc001gpr.2	chr1:182808451..182856882,+	DHX9	KIRP_ctrl	KIRP_cancer	ORF_seq_similarity	TRUE	ORF is shorter
uc001gpr.2,uc009wyd.2	uc009wyd.2	uc001gpr.2	chr1:182808451..182856882,+	DHX9	KIRP_ctrl	KIRP_cancer	domains_identified	TRUE	Domain loss
uc001bbc.2,uc010ocu.1	uc010ocu.1	uc001bbc.2	chr1:19197926..19229293,-	ALDH4A1	KICH_ctrl	KICH_cancer	ORF_seq_similarity	TRUE	ORF is shorter
uc001bbc.2,uc010ocu.1	uc010ocu.1	uc001bbc.2	chr1:19197926..19229293,-	ALDH4A1	KIRC_ctrl	KIRC_cancer	ORF_seq_similarity	TRUE	ORF is shorter
uc001bbc.2,uc010ocu.1	uc010ocu.1	uc001bbc.2	chr1:19197926..19229293,-	ALDH4A1	KIRP_ctrl	KIRP_cancer	ORF_seq_similarity	TRUE	ORF is shorter
uc001bbc.2,uc010ocu.1	uc010ocu.1	uc001bbc.2	chr1:19197926..19229293,-	ALDH4A1	THCA_ctrl	THCA_cancer	ORF_seq_similarity	TRUE	ORF is shorter
uc001gti.3,uc001gtj.3	uc001gtj.3	uc001gti.3	chr1:196621008..196716631,+	CFH	BRCA_ctrl	BRCA_cancer	ORF_seq_similarity	TRUE	ORF is longer
uc001gti.3,uc001gtj.3	uc001gtj.3	uc001gti.3	chr1:196621008..196716631,+	CFH	BRCA_ctrl	BRCA_cancer	domains_identified	TRUE	Domain gain
uc001gti.3,uc001gtj.3	uc001gtj.3	uc001gti.3	chr1:196621008..196716631,+	CFH	COAD_ctrl	COAD_cancer	ORF_seq_similarity	TRUE	ORF is longer
uc001gti.3,uc001gtj.3	uc001gtj.3	uc001gti.3	chr1:196621008..196716631,+	CFH	COAD_ctrl	COAD_cancer	domains_identified	TRUE	Domain gain
uc001gti.3,uc001gtj.3	uc001gtj.3	uc001gti.3	chr1:196621008..196716631,+	CFH	LUAD_ctrl	LUAD_cancer	ORF_seq_similarity	TRUE	ORF is longer
uc001gti.3,uc001gtj.3	uc001gtj.3	uc001gti.3	chr1:196621008..196716631,+	CFH	LUAD_ctrl	LUAD_cancer	domains_identified	TRUE	Domain gain
uc001gti.3,uc001gtj.3	uc001gtj.3	uc001gti.3	chr1:196621008..196716631,+	CFH	LUSC_ctrl	LUSC_cancer	ORF_seq_similarity	TRUE	ORF is longer
uc001gti.3,uc001gtj.3	uc001gtj.3	uc001gti.3	chr1:196621008..196716631,+	CFH	LUSC_ctrl	LUSC_cancer	domains_identified	TRUE	Domain gain
uc001gti.3,uc001gtj.3	uc001gtj.3	uc001gti.3	chr1:196621008..196716631,+	CFH	STAD_ctrl	STAD_cancer	ORF_seq_similarity	TRUE	ORF is longer
uc001gti.3,uc001gtj.3	uc001gtj.3	uc001gti.3	chr1:196621008..196716631,+	CFH	STAD_ctrl	STAD_cancer	domains_identified	TRUE	Domain gain
uc001gti.3,uc001gtj.3	uc001gtj.3	uc001gti.3	chr1:196621008..196716631,+	CFH	THCA_ctrl	THCA_cancer	ORF_seq_similarity	TRUE	ORF is longer
uc001gti.3,uc001gtj.3	uc001gtj.3	uc001gti.3	chr1:196621008..196716631,+	CFH	THCA_ctrl	THCA_cancer	domains_identified	TRUE	Domain gain
uc001bcn.2,uc001bcm.2	uc001bcm.2	uc001bcn.2	chr1:20008707..20126758,-	TMCO4	KIRC_ctrl	KIRC_cancer	ORF_seq_similarity	TRUE	ORF is shorter
uc001bcn.2,uc001bcm.2	uc001bcm.2	uc001bcn.2	chr1:20008707..20126758,-	TMCO4	KIRC_ctrl	KIRC_cancer	domains_identified	TRUE	Domain gain
uc001bcn.2,uc001bcm.2	uc001bcm.2	uc001bcn.2	chr1:20008707..20126758,-	TMCO4	KIRP_ctrl	KIRP_cancer	ORF_seq_similarity	TRUE	ORF is shorter
uc001bcn.2,uc001bcm.2	uc001bcm.2	uc001bcn.2	chr1:20008707..20126758,-	TMCO4	KIRP_ctrl	KIRP_cancer	domains_identified	TRUE	Domain gain
uc010ppm.1,uc001gvo.2	uc001gvo.2	uc010ppm.1	chr1:200860639..200884863,+	C1orf106	BRCA_ctrl	BRCA_cancer	ORF_seq_similarity	TRUE	ORF is longer
uc010ppm.1,uc001gvo.2	uc001gvo.2	uc010ppm.1	chr1:200860639..200884863,+	C1orf106	KIRC_ctrl	KIRC_cancer	ORF_seq_similarity	TRUE	ORF is longer
uc001gwu.2,uc001gwx.2	uc001gwx.2	uc001gwu.2	chr1:201617450..201796097,+	NAV1	THCA_ctrl	THCA_cancer	ORF_seq_similarity	TRUE	ORF is shorter
uc001gxu.2,uc001gxw.2	uc001gxw.2	uc001gxu.2	chr1:202163118..202288888,+	LGR6	PRAD_ctrl	PRAD_cancer	ORF_seq_similarity	TRUE	ORF is shorter
uc001gxu.2,uc001gxw.2	uc001gxw.2	uc001gxu.2	chr1:202163118..202288888,+	LGR6	PRAD_ctrl	PRAD_cancer	domains_identified	TRUE	Domain loss
uc001gxu.2,uc001gxw.2	uc001gxw.2	uc001gxu.2	chr1:202163118..202288888,+	LGR6	PRAD_ctrl	PRAD_cancer	signal_peptide_identified	TRUE	Signal peptide loss
uc001gyo.1,uc001gym.1	uc001gym.1	uc001gyo.1	chr1:202860230..202897727,-	KLHL12	KIRP_ctrl	KIRP_cancer	ORF_seq_similarity	TRUE	ORF is shorter
uc001gyo.1,uc001gym.1	uc001gym.1	uc001gyo.1	chr1:202860230..202897727,-	KLHL12	KIRP_ctrl	KIRP_cancer	domains_identified	TRUE	Domain loss
uc001gyq.3,uc010pqd.1	uc010pqd.1	uc001gyq.3	chr1:202909963..202927700,-	ADIPOR1	KIRP_ctrl	KIRP_cancer	ORF_seq_similarity	TRUE	ORF is shorter
uc001gyq.3,uc010pqd.1	uc010pqd.1	uc001gyq.3	chr1:202909963..202927700,-	ADIPOR1	THCA_ctrl	THCA_cancer	ORF_seq_similarity	TRUE	ORF is shorter
uc001gyy.2,uc001gyu.1	uc001gyu.1	uc001gyy.2	chr1:202976534..202993975,+	TMEM183A	LUSC_ctrl	LUSC_cancer	coding_potential	TRUE	Transcript is coding
uc001gyy.2,uc001gyu.1	uc001gyu.1	uc001gyy.2	chr1:202976534..202993975,+	TMEM183A	LUSC_ctrl	LUSC_cancer	ORF_seq_similarity	TRUE	Complete ORF gain
uc009xar.2,uc001gzx.2	uc001gzx.2	uc009xar.2	chr1:203595928..203713207,+	ATP2B4	COAD_ctrl	COAD_cancer	ORF_seq_similarity	TRUE	ORF is longer
uc009xar.2,uc001gzx.2	uc001gzx.2	uc009xar.2	chr1:203595928..203713207,+	ATP2B4	COAD_ctrl	COAD_cancer	domains_identified	TRUE	Domain gain
uc001gzw.2,uc001gzx.2	uc001gzx.2	uc001gzw.2	chr1:203595928..203713207,+	ATP2B4	KIRP_ctrl	KIRP_cancer	ORF_seq_similarity	TRUE	ORF is shorter
uc001gzw.2,uc001gzx.2	uc001gzx.2	uc001gzw.2	chr1:203595928..203713207,+	ATP2B4	KIRP_ctrl	KIRP_cancer	domains_identified	TRUE	Domain loss
uc001gzv.2,uc001gzx.2	uc001gzx.2	uc001gzv.2	chr1:203595928..203713207,+	ATP2B4	STAD_ctrl	STAD_cancer	ORF_seq_similarity	TRUE	ORF is shorter
uc001gzv.2,uc001gzx.2	uc001gzx.2	uc001gzv.2	chr1:203595928..203713207,+	ATP2B4	STAD_ctrl	STAD_cancer	domains_identified	TRUE	Domain loss
uc001gzw.2,uc001gzx.2	uc001gzx.2	uc001gzw.2	chr1:203595928..203713207,+	ATP2B4	THCA_ctrl	THCA_cancer	ORF_seq_similarity	TRUE	ORF is shorter
uc001gzw.2,uc001gzx.2	uc001gzx.2	uc001gzw.2	chr1:203595928..203713207,+	ATP2B4	THCA_ctrl	THCA_cancer	domains_identified	TRUE	Domain loss
uc001hba.2,uc001hbb.2	uc001hbb.2	uc001hba.2	chr1:204485511..204677661,+	MDM4	LUSC_ctrl	LUSC_cancer	ORF_seq_similarity	TRUE	ORF is shorter
uc001hba.2,uc001hbb.2	uc001hbb.2	uc001hba.2	chr1:204485511..204677661,+	MDM4	LUSC_ctrl	LUSC_cancer	domains_identified	TRUE	Domain loss
uc001hba.2,uc001hbb.2	uc001hbb.2	uc001hba.2	chr1:204485511..204677661,+	MDM4	THCA_ctrl	THCA_cancer	ORF_seq_similarity	TRUE	ORF is shorter
uc001hba.2,uc001hbb.2	uc001hbb.2	uc001hba.2	chr1:204485511..204677661,+	MDM4	THCA_ctrl	THCA_cancer	domains_identified	TRUE	Domain loss
uc001hcq.2,uc001hct.2	uc001hct.2	uc001hcq.2	chr1:205473727..205501915,+	CDK18	COAD_ctrl	COAD_cancer	ORF_seq_similarity	TRUE	Complete ORF loss
uc001hcq.2,uc001hct.2	uc001hct.2	uc001hcq.2	chr1:205473727..205501915,+	CDK18	COAD_ctrl	COAD_cancer	domains_identified	TRUE	Domain loss
uc001hcq.2,uc001hct.2	uc001hct.2	uc001hcq.2	chr1:205473727..205501915,+	CDK18	KIRP_ctrl	KIRP_cancer	ORF_seq_similarity	TRUE	Complete ORF loss
uc001hcq.2,uc001hct.2	uc001hct.2	uc001hcq.2	chr1:205473727..205501915,+	CDK18	KIRP_ctrl	KIRP_cancer	domains_identified	TRUE	Domain loss
uc001hcq.2,uc001hct.2	uc001hct.2	uc001hcq.2	chr1:205473727..205501915,+	CDK18	LUSC_ctrl	LUSC_cancer	ORF_seq_similarity	TRUE	Complete ORF loss
uc001hcq.2,uc001hct.2	uc001hct.2	uc001hcq.2	chr1:205473727..205501915,+	CDK18	LUSC_ctrl	LUSC_cancer	domains_identified	TRUE	Domain loss
uc001hcq.2,uc001hct.2	uc001hct.2	uc001hcq.2	chr1:205473727..205501915,+	CDK18	PRAD_ctrl	PRAD_cancer	ORF_seq_similarity	TRUE	Complete ORF loss
uc001hcq.2,uc001hct.2	uc001hct.2	uc001hcq.2	chr1:205473727..205501915,+	CDK18	PRAD_ctrl	PRAD_cancer	domains_identified	TRUE	Domain loss
uc001hdh.1,uc001hdg.1	uc001hdg.1	uc001hdh.1	chr1:205758221..205782161,-	SLC41A1	THCA_ctrl	THCA_cancer	ORF_seq_similarity	TRUE	ORF is shorter
uc001hdh.1,uc001hdg.1	uc001hdg.1	uc001hdh.1	chr1:205758221..205782161,-	SLC41A1	THCA_ctrl	THCA_cancer	domains_identified	TRUE	Domain loss
uc001hdq.2,uc001hdm.2	uc001hdm.2	uc001hdq.2	chr1:205882179..205912588,-	SLC26A9	LUSC_ctrl	LUSC_cancer	ORF_seq_similarity	TRUE	ORF is shorter
uc001hdq.2,uc001hdm.2	uc001hdm.2	uc001hdq.2	chr1:205882179..205912588,-	SLC26A9	LUSC_ctrl	LUSC_cancer	domains_identified	TRUE	Domain loss
uc001hdx.2,uc001hdy.2	uc001hdy.2	uc001hdx.2	chr1:206516200..206637782,+	SRGAP2	BRCA_ctrl	BRCA_cancer	ORF_seq_similarity	TRUE	ORF is longer
uc001hdy.2,uc001hdx.2	uc001hdx.2	uc001hdy.2	chr1:206516200..206637782,+	SRGAP2	KIRP_ctrl	KIRP_cancer	ORF_seq_similarity	TRUE	ORF is shorter
uc001hdy.2,uc010pru.1	uc010pru.1	uc001hdy.2	chr1:206516200..206637782,+	SRGAP2	KIRP_ctrl	KIRP_cancer	domains_identified	TRUE	Domain gain
uc001hed.2,uc001hef.2	uc001hef.2	uc001hed.2	chr1:206680879..206762615,+	RASSF5	HNSC_ctrl	HNSC_cancer	ORF_seq_similarity	TRUE	ORF is shorter
uc001hed.2,uc001hef.2	uc001hef.2	uc001hed.2	chr1:206680879..206762615,+	RASSF5	HNSC_ctrl	HNSC_cancer	domains_identified	TRUE	Domain loss
uc001hed.2,uc001hef.2	uc001hef.2	uc001hed.2	chr1:206680879..206762615,+	RASSF5	PRAD_ctrl	PRAD_cancer	ORF_seq_similarity	TRUE	ORF is shorter
uc001hed.2,uc001hef.2	uc001hef.2	uc001hed.2	chr1:206680879..206762615,+	RASSF5	PRAD_ctrl	PRAD_cancer	domains_identified	TRUE	Domain loss
uc001hey.2,uc010prz.1	uc010prz.1	uc001hey.2	chr1:207076633..207096592,-	FAIM3	BRCA_ctrl	BRCA_cancer	ORF_seq_similarity	TRUE	ORF is shorter
uc001hey.2,uc010prz.1	uc010prz.1	uc001hey.2	chr1:207076633..207096592,-	FAIM3	BRCA_ctrl	BRCA_cancer	domains_identified	TRUE	Domain loss
uc001hey.2,uc010prz.1	uc010prz.1	uc001hey.2	chr1:207076633..207096592,-	FAIM3	BRCA_ctrl	BRCA_cancer	signal_peptide_identified	TRUE	Signal peptide loss
uc001hey.2,uc010prz.1	uc010prz.1	uc001hey.2	chr1:207076633..207096592,-	FAIM3	THCA_ctrl	THCA_cancer	ORF_seq_similarity	TRUE	ORF is shorter
uc001hey.2,uc010prz.1	uc010prz.1	uc001hey.2	chr1:207076633..207096592,-	FAIM3	THCA_ctrl	THCA_cancer	domains_identified	TRUE	Domain loss
uc001hey.2,uc010prz.1	uc010prz.1	uc001hey.2	chr1:207076633..207096592,-	FAIM3	THCA_ctrl	THCA_cancer	signal_peptide_identified	TRUE	Signal peptide loss
uc001hfh.2,uc010psd.1	uc010psd.1	uc001hfh.2	chr1:207207761..207254367,+	PFKFB2	KIRP_ctrl	KIRP_cancer	ORF_seq_similarity	TRUE	ORF is shorter
uc001hfp.3,uc001hfq.3	uc001hfq.3	uc001hfp.3	chr1:207494817..207534309,+	CD55	COAD_ctrl	COAD_cancer	ORF_seq_similarity	TRUE	ORF is shorter
uc001hfp.3,uc001hfq.3	uc001hfq.3	uc001hfp.3	chr1:207494817..207534309,+	CD55	COAD_ctrl	COAD_cancer	domains_identified	TRUE	Domain loss
uc001hfp.3,uc001hfq.3	uc001hfq.3	uc001hfp.3	chr1:207494817..207534309,+	CD55	KICH_ctrl	KICH_cancer	ORF_seq_similarity	TRUE	ORF is shorter
uc001hfp.3,uc001hfq.3	uc001hfq.3	uc001hfp.3	chr1:207494817..207534309,+	CD55	KICH_ctrl	KICH_cancer	domains_identified	TRUE	Domain loss
uc001hfp.3,uc001hfq.3	uc001hfq.3	uc001hfp.3	chr1:207494817..207534309,+	CD55	STAD_ctrl	STAD_cancer	ORF_seq_similarity	TRUE	ORF is shorter
uc001hfp.3,uc001hfq.3	uc001hfq.3	uc001hfp.3	chr1:207494817..207534309,+	CD55	STAD_ctrl	STAD_cancer	domains_identified	TRUE	Domain loss
uc001bdh.2,uc001bdg.2	uc001bdg.2	uc001bdh.2	chr1:20808885..20812728,-	CAMK2N1	KIRC_ctrl	KIRC_cancer	coding_potential	TRUE	Transcript is Noncoding
uc001bdh.2,uc001bdg.2	uc001bdg.2	uc001bdh.2	chr1:20808885..20812728,-	CAMK2N1	KIRC_ctrl	KIRC_cancer	ORF_seq_similarity	TRUE	Complete ORF loss
uc001bdh.2,uc001bdg.2	uc001bdg.2	uc001bdh.2	chr1:20808885..20812728,-	CAMK2N1	KIRC_ctrl	KIRC_cancer	domains_identified	TRUE	Domain loss
uc001bdh.2,uc001bdg.2	uc001bdg.2	uc001bdh.2	chr1:20808885..20812728,-	CAMK2N1	THCA_ctrl	THCA_cancer	coding_potential	TRUE	Transcript is Noncoding
uc001bdh.2,uc001bdg.2	uc001bdg.2	uc001bdh.2	chr1:20808885..20812728,-	CAMK2N1	THCA_ctrl	THCA_cancer	ORF_seq_similarity	TRUE	Complete ORF loss
uc001bdh.2,uc001bdg.2	uc001bdg.2	uc001bdh.2	chr1:20808885..20812728,-	CAMK2N1	THCA_ctrl	THCA_cancer	domains_identified	TRUE	Domain loss
uc001hgz.2,uc001hgy.2	uc001hgy.2	uc001hgz.2	chr1:208195590..208417665,-	PLXNA2	KIRC_ctrl	KIRC_cancer	ORF_seq_similarity	TRUE	ORF is shorter
uc001hgz.2,uc001hgy.2	uc001hgy.2	uc001hgz.2	chr1:208195590..208417665,-	PLXNA2	KIRC_ctrl	KIRC_cancer	domains_identified	TRUE	Domain loss
uc001hgz.2,uc001hgy.2	uc001hgy.2	uc001hgz.2	chr1:208195590..208417665,-	PLXNA2	KIRC_ctrl	KIRC_cancer	signal_peptide_identified	TRUE	Signal peptide loss
uc009xcx.2,uc001hia.3	uc001hia.3	uc009xcx.2	chr1:210501606..210849631,+	HHAT	BRCA_ctrl	BRCA_cancer	ORF_seq_similarity	TRUE	ORF is shorter
uc001hhz.3,uc001hia.3	uc001hia.3	uc001hhz.3	chr1:210501606..210849631,+	HHAT	KIRC_ctrl	KIRC_cancer	ORF_seq_similarity	TRUE	ORF is shorter
uc001hhz.3,uc001hia.3	uc001hia.3	uc001hhz.3	chr1:210501606..210849631,+	HHAT	KIRP_ctrl	KIRP_cancer	ORF_seq_similarity	TRUE	ORF is shorter
uc001hhz.3,uc001hia.3	uc001hia.3	uc001hhz.3	chr1:210501606..210849631,+	HHAT	THCA_ctrl	THCA_cancer	ORF_seq_similarity	TRUE	ORF is shorter
uc010odh.1,uc010odf.1	uc010odf.1	uc010odh.1	chr1:21069171..21113799,-	HP1BP3	PRAD_ctrl	PRAD_cancer	ORF_seq_similarity	TRUE	ORF is shorter
uc010odh.1,uc010odf.1	uc010odf.1	uc010odh.1	chr1:21069171..21113799,-	HP1BP3	PRAD_ctrl	PRAD_cancer	domains_identified	TRUE	Domain loss
uc001hif.2,uc009xcz.2	uc009xcz.2	uc001hif.2	chr1:211432708..211489723,+	RCOR3	KIRC_ctrl	KIRC_cancer	coding_potential	TRUE	Transcript is Noncoding
uc001hif.2,uc009xcz.2	uc009xcz.2	uc001hif.2	chr1:211432708..211489723,+	RCOR3	KIRC_ctrl	KIRC_cancer	ORF_seq_similarity	TRUE	Complete ORF loss
uc001hif.2,uc009xcz.2	uc009xcz.2	uc001hif.2	chr1:211432708..211489723,+	RCOR3	KIRC_ctrl	KIRC_cancer	domains_identified	TRUE	Domain loss
uc001hif.2,uc009xcz.2	uc009xcz.2	uc001hif.2	chr1:211432708..211489723,+	RCOR3	KIRP_ctrl	KIRP_cancer	coding_potential	TRUE	Transcript is Noncoding
uc001hif.2,uc009xcz.2	uc009xcz.2	uc001hif.2	chr1:211432708..211489723,+	RCOR3	KIRP_ctrl	KIRP_cancer	ORF_seq_similarity	TRUE	Complete ORF loss
uc001hif.2,uc009xcz.2	uc009xcz.2	uc001hif.2	chr1:211432708..211489723,+	RCOR3	KIRP_ctrl	KIRP_cancer	domains_identified	TRUE	Domain loss
uc001hif.2,uc001hie.2	uc001hie.2	uc001hif.2	chr1:211432708..211489723,+	RCOR3	LUSC_ctrl	LUSC_cancer	domains_identified	TRUE	Domain gain
uc001hif.2,uc009xcz.2	uc009xcz.2	uc001hif.2	chr1:211432708..211489723,+	RCOR3	STAD_ctrl	STAD_cancer	coding_potential	TRUE	Transcript is Noncoding
uc001hif.2,uc009xcz.2	uc009xcz.2	uc001hif.2	chr1:211432708..211489723,+	RCOR3	STAD_ctrl	STAD_cancer	ORF_seq_similarity	TRUE	Complete ORF loss
uc001hif.2,uc009xcz.2	uc009xcz.2	uc001hif.2	chr1:211432708..211489723,+	RCOR3	STAD_ctrl	STAD_cancer	domains_identified	TRUE	Domain loss
uc010ptr.1,uc001hke.2	uc001hke.2	uc010ptr.1	chr1:213224588..213446807,+	RPS6KC1	KIRC_ctrl	KIRC_cancer	ORF_seq_similarity	TRUE	ORF is shorter
uc010ptr.1,uc001hke.2	uc001hke.2	uc010ptr.1	chr1:213224588..213446807,+	RPS6KC1	KIRC_ctrl	KIRC_cancer	domains_identified	TRUE	Domain loss
uc010ptr.1,uc001hke.2	uc001hke.2	uc010ptr.1	chr1:213224588..213446807,+	RPS6KC1	THCA_ctrl	THCA_cancer	ORF_seq_similarity	TRUE	ORF is shorter
uc010ptr.1,uc001hke.2	uc001hke.2	uc010ptr.1	chr1:213224588..213446807,+	RPS6KC1	THCA_ctrl	THCA_cancer	domains_identified	TRUE	Domain loss
uc001hks.2,uc009xdn.2	uc009xdn.2	uc001hks.2	chr1:215740735..215795147,+	KCTD3	KICH_ctrl	KICH_cancer	ORF_seq_similarity	TRUE	ORF is shorter
uc001hks.2,uc009xdn.2	uc009xdn.2	uc001hks.2	chr1:215740735..215795147,+	KCTD3	KICH_ctrl	KICH_cancer	domains_identified	TRUE	Domain loss
uc001hks.2,uc009xdn.2	uc009xdn.2	uc001hks.2	chr1:215740735..215795147,+	KCTD3	KIRP_ctrl	KIRP_cancer	ORF_seq_similarity	TRUE	ORF is shorter
uc001hks.2,uc009xdn.2	uc009xdn.2	uc001hks.2	chr1:215740735..215795147,+	KCTD3	KIRP_ctrl	KIRP_cancer	domains_identified	TRUE	Domain loss
uc001hks.2,uc009xdn.2	uc009xdn.2	uc001hks.2	chr1:215740735..215795147,+	KCTD3	THCA_ctrl	THCA_cancer	ORF_seq_similarity	TRUE	ORF is shorter
uc001hks.2,uc009xdn.2	uc009xdn.2	uc001hks.2	chr1:215740735..215795147,+	KCTD3	THCA_ctrl	THCA_cancer	domains_identified	TRUE	Domain loss
uc001hkw.1,uc010pud.1	uc010pud.1	uc001hkw.1	chr1:216676588..217311097,-	ESRRG	KIRC_ctrl	KIRC_cancer	ORF_seq_similarity	TRUE	ORF is shorter
uc001hkw.1,uc010pud.1	uc010pud.1	uc001hkw.1	chr1:216676588..217311097,-	ESRRG	KIRC_ctrl	KIRC_cancer	domains_identified	TRUE	Domain loss
uc001hlc.1,uc010pud.1	uc010pud.1	uc001hlc.1	chr1:216676588..217311097,-	ESRRG	KIRC_ctrl	KIRC_cancer	ORF_seq_similarity	TRUE	ORF is shorter
uc001hlc.1,uc010pud.1	uc010pud.1	uc001hlc.1	chr1:216676588..217311097,-	ESRRG	KIRC_ctrl	KIRC_cancer	domains_identified	TRUE	Domain loss
uc001hkw.1,uc010pud.1	uc010pud.1	uc001hkw.1	chr1:216676588..217311097,-	ESRRG	KIRP_ctrl	KIRP_cancer	ORF_seq_similarity	TRUE	ORF is shorter
uc001hkw.1,uc010pud.1	uc010pud.1	uc001hkw.1	chr1:216676588..217311097,-	ESRRG	KIRP_ctrl	KIRP_cancer	domains_identified	TRUE	Domain loss
uc001hlc.1,uc010pud.1	uc010pud.1	uc001hlc.1	chr1:216676588..217311097,-	ESRRG	KIRP_ctrl	KIRP_cancer	ORF_seq_similarity	TRUE	ORF is shorter
uc001hlc.1,uc010pud.1	uc010pud.1	uc001hlc.1	chr1:216676588..217311097,-	ESRRG	KIRP_ctrl	KIRP_cancer	domains_identified	TRUE	Domain loss
uc001hlg.3,uc001hlf.1	uc001hlf.1	uc001hlg.3	chr1:217603834..217804409,-	GPATCH2	KICH_ctrl	KICH_cancer	ORF_seq_similarity	TRUE	ORF is longer
uc001hlg.3,uc001hlf.1	uc001hlf.1	uc001hlg.3	chr1:217603834..217804409,-	GPATCH2	KICH_ctrl	KICH_cancer	domains_identified	TRUE	Domain gain
uc001hlg.3,uc001hlf.1	uc001hlf.1	uc001hlg.3	chr1:217603834..217804409,-	GPATCH2	KIRC_ctrl	KIRC_cancer	ORF_seq_similarity	TRUE	ORF is longer
uc001hlg.3,uc001hlf.1	uc001hlf.1	uc001hlg.3	chr1:217603834..217804409,-	GPATCH2	KIRC_ctrl	KIRC_cancer	domains_identified	TRUE	Domain gain
uc001beu.3,uc010odp.1	uc010odp.1	uc001beu.3	chr1:21835858..21904904,+	ALPL	KICH_ctrl	KICH_cancer	ORF_seq_similarity	TRUE	ORF is shorter
uc001beu.3,uc010odp.1	uc010odp.1	uc001beu.3	chr1:21835858..21904904,+	ALPL	KICH_ctrl	KICH_cancer	signal_peptide_identified	TRUE	Signal peptide loss
uc001beu.3,uc010odp.1	uc010odp.1	uc001beu.3	chr1:21835858..21904904,+	ALPL	KIRP_ctrl	KIRP_cancer	ORF_seq_similarity	TRUE	ORF is shorter
uc001beu.3,uc010odp.1	uc010odp.1	uc001beu.3	chr1:21835858..21904904,+	ALPL	KIRP_ctrl	KIRP_cancer	signal_peptide_identified	TRUE	Signal peptide loss
uc001hmn.3,uc001hml.2	uc001hml.2	uc001hmn.3	chr1:220701568..220837798,+	MARK1	LUSC_ctrl	LUSC_cancer	coding_potential	TRUE	Transcript is Noncoding
uc001hmn.3,uc001hml.2	uc001hml.2	uc001hmn.3	chr1:220701568..220837798,+	MARK1	LUSC_ctrl	LUSC_cancer	ORF_seq_similarity	TRUE	ORF is shorter
uc001hmn.3,uc001hml.2	uc001hml.2	uc001hmn.3	chr1:220701568..220837798,+	MARK1	LUSC_ctrl	LUSC_cancer	domains_identified	TRUE	Domain loss
uc001bfh.1,uc001bfg.1	uc001bfg.1	uc001bfh.1	chr1:22138758..22151714,+	LDLRAD2	BRCA_ctrl	BRCA_cancer	coding_potential	TRUE	Transcript is coding
uc001bfh.1,uc001bfg.1	uc001bfg.1	uc001bfh.1	chr1:22138758..22151714,+	LDLRAD2	BRCA_ctrl	BRCA_cancer	ORF_seq_similarity	TRUE	Complete ORF gain
uc001bfh.1,uc001bfg.1	uc001bfg.1	uc001bfh.1	chr1:22138758..22151714,+	LDLRAD2	BRCA_ctrl	BRCA_cancer	domains_identified	TRUE	Domain gain
uc001bfh.1,uc001bfg.1	uc001bfg.1	uc001bfh.1	chr1:22138758..22151714,+	LDLRAD2	BRCA_ctrl	BRCA_cancer	signal_peptide_identified	TRUE	Signal peptide gain
uc001bfh.1,uc001bfg.1	uc001bfg.1	uc001bfh.1	chr1:22138758..22151714,+	LDLRAD2	LUAD_ctrl	LUAD_cancer	coding_potential	TRUE	Transcript is coding
uc001bfh.1,uc001bfg.1	uc001bfg.1	uc001bfh.1	chr1:22138758..22151714,+	LDLRAD2	LUAD_ctrl	LUAD_cancer	ORF_seq_similarity	TRUE	Complete ORF gain
uc001bfh.1,uc001bfg.1	uc001bfg.1	uc001bfh.1	chr1:22138758..22151714,+	LDLRAD2	LUAD_ctrl	LUAD_cancer	domains_identified	TRUE	Domain gain
uc001bfh.1,uc001bfg.1	uc001bfg.1	uc001bfh.1	chr1:22138758..22151714,+	LDLRAD2	LUAD_ctrl	LUAD_cancer	signal_peptide_identified	TRUE	Signal peptide gain
uc001bfh.1,uc001bfg.1	uc001bfg.1	uc001bfh.1	chr1:22138758..22151714,+	LDLRAD2	LUSC_ctrl	LUSC_cancer	coding_potential	TRUE	Transcript is coding
uc001bfh.1,uc001bfg.1	uc001bfg.1	uc001bfh.1	chr1:22138758..22151714,+	LDLRAD2	LUSC_ctrl	LUSC_cancer	ORF_seq_similarity	TRUE	Complete ORF gain
uc001bfh.1,uc001bfg.1	uc001bfg.1	uc001bfh.1	chr1:22138758..22151714,+	LDLRAD2	LUSC_ctrl	LUSC_cancer	domains_identified	TRUE	Domain gain
uc001bfh.1,uc001bfg.1	uc001bfg.1	uc001bfh.1	chr1:22138758..22151714,+	LDLRAD2	LUSC_ctrl	LUSC_cancer	signal_peptide_identified	TRUE	Signal peptide gain
uc001hnl.2,uc001hnm.2	uc001hnm.2	uc001hnl.2	chr1:222791444..222841350,+	MIA3	THCA_ctrl	THCA_cancer	ORF_seq_similarity	TRUE	ORF is shorter
uc001hnl.2,uc001hnm.2	uc001hnm.2	uc001hnl.2	chr1:222791444..222841350,+	MIA3	THCA_ctrl	THCA_cancer	domains_identified	TRUE	Domain loss
uc001hnl.2,uc001hnm.2	uc001hnm.2	uc001hnl.2	chr1:222791444..222841350,+	MIA3	THCA_ctrl	THCA_cancer	signal_peptide_identified	TRUE	Signal peptide loss
uc010pvb.1,uc010puz.1	uc010puz.1	uc010pvb.1	chr1:223967596..224033674,-	TP53BP2	THCA_ctrl	THCA_cancer	ORF_seq_similarity	TRUE	ORF is shorter
uc001hok.2,uc001hol.2	uc001hol.2	uc001hok.2	chr1:224415037..224517872,-	NVL	KICH_ctrl	KICH_cancer	ORF_seq_similarity	TRUE	ORF is shorter
uc001hok.2,uc001hol.2	uc001hol.2	uc001hok.2	chr1:224415037..224517872,-	NVL	LUSC_ctrl	LUSC_cancer	ORF_seq_similarity	TRUE	ORF is shorter
uc001hqr.2,uc001hqp.2	uc001hqp.2	uc001hqr.2	chr1:227177567..227505826,-	CDC42BPA	THCA_ctrl	THCA_cancer	ORF_seq_similarity	TRUE	ORF is shorter
uc001hqr.2,uc001hqp.2	uc001hqp.2	uc001hqr.2	chr1:227177567..227505826,-	CDC42BPA	THCA_ctrl	THCA_cancer	domains_identified	TRUE	Domain loss
uc010pvw.1,uc001hsl.3	uc001hsl.3	uc010pvw.1	chr1:228353429..228369957,+	C1orf69	LUSC_ctrl	LUSC_cancer	ORF_seq_similarity	TRUE	ORF is longer
uc010pvw.1,uc001hsl.3	uc001hsl.3	uc010pvw.1	chr1:228353429..228369957,+	C1orf69	LUSC_ctrl	LUSC_cancer	domains_identified	TRUE	Domain gain
uc009xfa.2,uc001hsr.1	uc001hsr.1	uc009xfa.2	chr1:228395861..228566575,+	OBSCN	KICH_ctrl	KICH_cancer	ORF_seq_similarity	TRUE	ORF is longer
uc009xfa.2,uc001hsr.1	uc001hsr.1	uc009xfa.2	chr1:228395861..228566575,+	OBSCN	KICH_ctrl	KICH_cancer	domains_identified	TRUE	Domain gain
uc001hub.2,uc009xfh.1	uc009xfh.1	uc001hub.2	chr1:230972866..231005335,-	C1orf198	THCA_ctrl	THCA_cancer	ORF_seq_similarity	TRUE	ORF is shorter
uc001hvg.2,uc001hvf.2	uc001hvf.2	uc001hvg.2	chr1:232533714..232651243,-	SIPA1L2	THCA_ctrl	THCA_cancer	ORF_seq_similarity	TRUE	ORF is shorter
uc001hvg.2,uc001hvf.2	uc001hvf.2	uc001hvg.2	chr1:232533714..232651243,-	SIPA1L2	THCA_ctrl	THCA_cancer	domains_identified	TRUE	Domain loss
uc001hwc.2,uc001hwb.2	uc001hwb.2	uc001hwc.2	chr1:234509275..234519790,+	C1orf31	BRCA_ctrl	BRCA_cancer	ORF_seq_similarity	TRUE	ORF is shorter
uc001hwg.2,uc009xfw.2	uc009xfw.2	uc001hwg.2	chr1:234740017..234745271,-	IRF2BP2	KICH_ctrl	KICH_cancer	ORF_seq_similarity	TRUE	ORF is shorter
uc001hwg.2,uc009xfw.2	uc009xfw.2	uc001hwg.2	chr1:234740017..234745271,-	IRF2BP2	KICH_ctrl	KICH_cancer	domains_identified	TRUE	Domain loss
uc001bgs.3,uc001bgo.2	uc001bgo.2	uc001bgs.3	chr1:23636277..23670853,-	HNRNPR	KICH_ctrl	KICH_cancer	ORF_seq_similarity	TRUE	ORF is shorter
uc001bgs.3,uc001bgo.2	uc001bgo.2	uc001bgs.3	chr1:23636277..23670853,-	HNRNPR	KICH_ctrl	KICH_cancer	domains_identified	TRUE	Domain loss
uc001hxz.1,uc001hxy.1	uc001hxy.1	uc001hxz.1	chr1:236681565..236712996,+	LGALS8	HNSC_ctrl	HNSC_cancer	ORF_seq_similarity	TRUE	ORF is longer
uc001hxz.1,uc001hxy.1	uc001hxy.1	uc001hxz.1	chr1:236681565..236712996,+	LGALS8	LUAD_ctrl	LUAD_cancer	ORF_seq_similarity	TRUE	ORF is longer
uc001hxz.1,uc001hxy.1	uc001hxy.1	uc001hxz.1	chr1:236681565..236712996,+	LGALS8	LUSC_ctrl	LUSC_cancer	ORF_seq_similarity	TRUE	ORF is longer
uc001hyd.1,uc009xgh.1	uc009xgh.1	uc001hyd.1	chr1:236713971..236767814,-	HEATR1	THCA_ctrl	THCA_cancer	ORF_seq_similarity	TRUE	ORF is shorter
uc001hyd.1,uc009xgh.1	uc009xgh.1	uc001hyd.1	chr1:236713971..236767814,-	HEATR1	THCA_ctrl	THCA_cancer	domains_identified	TRUE	Domain loss
uc001hyi.3,uc010pxy.1	uc010pxy.1	uc001hyi.3	chr1:236958581..237067280,+	MTR	KIRC_ctrl	KIRC_cancer	ORF_seq_similarity	TRUE	ORF is shorter
uc001hyi.3,uc010pxy.1	uc010pxy.1	uc001hyi.3	chr1:236958581..237067280,+	MTR	THCA_ctrl	THCA_cancer	ORF_seq_similarity	TRUE	ORF is shorter
uc001bha.2,uc001bgy.1	uc001bgy.1	uc001bha.2	chr1:23755056..23811057,-	ASAP3	THCA_ctrl	THCA_cancer	ORF_seq_similarity	TRUE	ORF is shorter
uc001bha.2,uc001bgy.1	uc001bgy.1	uc001bha.2	chr1:23755056..23811057,-	ASAP3	THCA_ctrl	THCA_cancer	domains_identified	TRUE	Domain loss
uc001hyy.2,uc009xgp.2	uc009xgp.2	uc001hyy.2	chr1:241695680..241758943,+	KMO	LUAD_ctrl	LUAD_cancer	ORF_seq_similarity	TRUE	ORF is longer
uc001hza.2,uc001hzc.2	uc001hzc.2	uc001hza.2	chr1:241756453..241803701,-	OPN3	COAD_ctrl	COAD_cancer	ORF_seq_similarity	TRUE	Complete ORF loss
uc001hza.2,uc001hzc.2	uc001hzc.2	uc001hza.2	chr1:241756453..241803701,-	OPN3	COAD_ctrl	COAD_cancer	domains_identified	TRUE	Domain loss
uc001hza.2,uc001hzc.2	uc001hzc.2	uc001hza.2	chr1:241756453..241803701,-	OPN3	LIHC_ctrl	LIHC_cancer	ORF_seq_similarity	TRUE	Complete ORF loss
uc001hza.2,uc001hzc.2	uc001hzc.2	uc001hza.2	chr1:241756453..241803701,-	OPN3	LIHC_ctrl	LIHC_cancer	domains_identified	TRUE	Domain loss
uc001hza.2,uc001hzc.2	uc001hzc.2	uc001hza.2	chr1:241756453..241803701,-	OPN3	LUSC_ctrl	LUSC_cancer	ORF_seq_similarity	TRUE	Complete ORF loss
uc001hza.2,uc001hzc.2	uc001hzc.2	uc001hza.2	chr1:241756453..241803701,-	OPN3	LUSC_ctrl	LUSC_cancer	domains_identified	TRUE	Domain loss
uc001hzy.1,uc001hzx.2	uc001hzx.2	uc001hzy.1	chr1:243419320..243663392,+	SDCCAG8	LUSC_ctrl	LUSC_cancer	ORF_seq_similarity	TRUE	ORF is longer
uc001bis.2,uc001biu.2	uc001biu.2	uc001bis.2	chr1:24480648..24513751,-	IL28RA	THCA_ctrl	THCA_cancer	ORF_seq_similarity	TRUE	ORF is shorter
uc001bis.2,uc001biu.2	uc001biu.2	uc001bis.2	chr1:24480648..24513751,-	IL28RA	THCA_ctrl	THCA_cancer	domains_identified	TRUE	Domain loss
uc001iao.2,uc001iap.2	uc001iap.2	uc001iao.2	chr1:244816352..244872332,+	PPPDE1	KICH_ctrl	KICH_cancer	ORF_seq_similarity	TRUE	ORF is shorter
uc001iao.2,uc001iap.2	uc001iap.2	uc001iao.2	chr1:244816352..244872332,+	PPPDE1	THCA_ctrl	THCA_cancer	ORF_seq_similarity	TRUE	ORF is shorter
uc001iat.2,uc001iar.2	uc001iar.2	uc001iat.2	chr1:244998639..245008357,+	FAM36A	COAD_ctrl	COAD_cancer	ORF_seq_similarity	TRUE	Complete ORF gain
uc001iat.2,uc001iar.2	uc001iar.2	uc001iat.2	chr1:244998639..245008357,+	FAM36A	COAD_ctrl	COAD_cancer	domains_identified	TRUE	Domain gain
uc001iat.2,uc001iar.2	uc001iar.2	uc001iat.2	chr1:244998639..245008357,+	FAM36A	HNSC_ctrl	HNSC_cancer	ORF_seq_similarity	TRUE	Complete ORF gain
uc001iat.2,uc001iar.2	uc001iar.2	uc001iat.2	chr1:244998639..245008357,+	FAM36A	HNSC_ctrl	HNSC_cancer	domains_identified	TRUE	Domain gain
uc001iat.2,uc001iar.2	uc001iar.2	uc001iat.2	chr1:244998639..245008357,+	FAM36A	KICH_ctrl	KICH_cancer	ORF_seq_similarity	TRUE	Complete ORF gain
uc001iat.2,uc001iar.2	uc001iar.2	uc001iat.2	chr1:244998639..245008357,+	FAM36A	KICH_ctrl	KICH_cancer	domains_identified	TRUE	Domain gain
uc001iat.2,uc001iar.2	uc001iar.2	uc001iat.2	chr1:244998639..245008357,+	FAM36A	KIRC_ctrl	KIRC_cancer	ORF_seq_similarity	TRUE	Complete ORF gain
uc001iat.2,uc001iar.2	uc001iar.2	uc001iat.2	chr1:244998639..245008357,+	FAM36A	KIRC_ctrl	KIRC_cancer	domains_identified	TRUE	Domain gain
uc001iat.2,uc001iar.2	uc001iar.2	uc001iat.2	chr1:244998639..245008357,+	FAM36A	KIRP_ctrl	KIRP_cancer	ORF_seq_similarity	TRUE	Complete ORF gain
uc001iat.2,uc001iar.2	uc001iar.2	uc001iat.2	chr1:244998639..245008357,+	FAM36A	KIRP_ctrl	KIRP_cancer	domains_identified	TRUE	Domain gain
uc001iat.2,uc001iar.2	uc001iar.2	uc001iat.2	chr1:244998639..245008357,+	FAM36A	LIHC_ctrl	LIHC_cancer	ORF_seq_similarity	TRUE	Complete ORF gain
uc001iat.2,uc001iar.2	uc001iar.2	uc001iat.2	chr1:244998639..245008357,+	FAM36A	LIHC_ctrl	LIHC_cancer	domains_identified	TRUE	Domain gain
uc001iat.2,uc001iar.2	uc001iar.2	uc001iat.2	chr1:244998639..245008357,+	FAM36A	LUAD_ctrl	LUAD_cancer	ORF_seq_similarity	TRUE	Complete ORF gain
uc001iat.2,uc001iar.2	uc001iar.2	uc001iat.2	chr1:244998639..245008357,+	FAM36A	LUAD_ctrl	LUAD_cancer	domains_identified	TRUE	Domain gain
uc001iat.2,uc001iar.2	uc001iar.2	uc001iat.2	chr1:244998639..245008357,+	FAM36A	LUSC_ctrl	LUSC_cancer	ORF_seq_similarity	TRUE	Complete ORF gain
uc001iat.2,uc001iar.2	uc001iar.2	uc001iat.2	chr1:244998639..245008357,+	FAM36A	LUSC_ctrl	LUSC_cancer	domains_identified	TRUE	Domain gain
uc001iat.2,uc001iar.2	uc001iar.2	uc001iat.2	chr1:244998639..245008357,+	FAM36A	STAD_ctrl	STAD_cancer	ORF_seq_similarity	TRUE	Complete ORF gain
uc001iat.2,uc001iar.2	uc001iar.2	uc001iat.2	chr1:244998639..245008357,+	FAM36A	STAD_ctrl	STAD_cancer	domains_identified	TRUE	Domain gain
uc001ibl.2,uc001ibi.2	uc001ibi.2	uc001ibl.2	chr1:245912645..246670614,-	SMYD3	HNSC_ctrl	HNSC_cancer	ORF_seq_similarity	TRUE	ORF is shorter
uc001ibl.2,uc001ibi.2	uc001ibi.2	uc001ibl.2	chr1:245912645..246670614,-	SMYD3	HNSC_ctrl	HNSC_cancer	domains_identified	TRUE	Domain loss
uc001ibl.2,uc001ibi.2	uc001ibi.2	uc001ibl.2	chr1:245912645..246670614,-	SMYD3	LUAD_ctrl	LUAD_cancer	ORF_seq_similarity	TRUE	ORF is shorter
uc001ibl.2,uc001ibi.2	uc001ibi.2	uc001ibl.2	chr1:245912645..246670614,-	SMYD3	LUAD_ctrl	LUAD_cancer	domains_identified	TRUE	Domain loss
uc001ibl.2,uc001ibi.2	uc001ibi.2	uc001ibl.2	chr1:245912645..246670614,-	SMYD3	LUSC_ctrl	LUSC_cancer	ORF_seq_similarity	TRUE	ORF is shorter
uc001ibl.2,uc001ibi.2	uc001ibi.2	uc001ibl.2	chr1:245912645..246670614,-	SMYD3	LUSC_ctrl	LUSC_cancer	domains_identified	TRUE	Domain loss
uc001bjh.2,uc001bjg.2	uc001bjg.2	uc001bjh.2	chr1:24742245..24799472,+	NIPAL3	LUAD_ctrl	LUAD_cancer	ORF_seq_similarity	TRUE	ORF is shorter
uc001bjh.2,uc001bjg.2	uc001bjg.2	uc001bjh.2	chr1:24742245..24799472,+	NIPAL3	LUSC_ctrl	LUSC_cancer	ORF_seq_similarity	TRUE	ORF is shorter
uc009vrj.2,uc001bjr.2	uc001bjr.2	uc009vrj.2	chr1:25226003..25291612,-	RUNX3	LUAD_ctrl	LUAD_cancer	intron_retention	TRUE	Intron retention gain
uc001bkl.3,uc009vrw.2	uc009vrw.2	uc001bkl.3	chr1:25870076..25895375,+	LDLRAP1	KIRP_ctrl	KIRP_cancer	coding_potential	TRUE	Transcript is Noncoding
uc001bkl.3,uc009vrw.2	uc009vrw.2	uc001bkl.3	chr1:25870076..25895375,+	LDLRAP1	KIRP_ctrl	KIRP_cancer	ORF_seq_similarity	TRUE	Complete ORF loss
uc001bkl.3,uc009vrw.2	uc009vrw.2	uc001bkl.3	chr1:25870076..25895375,+	LDLRAP1	KIRP_ctrl	KIRP_cancer	domains_identified	TRUE	Domain loss
uc001bkm.2,uc001bkn.2	uc001bkn.2	uc001bkm.2	chr1:25943959..26111258,+	MAN1C1	KIRP_ctrl	KIRP_cancer	coding_potential	TRUE	Transcript is Noncoding
uc001bkm.2,uc001bkn.2	uc001bkn.2	uc001bkm.2	chr1:25943959..26111258,+	MAN1C1	KIRP_ctrl	KIRP_cancer	ORF_seq_similarity	TRUE	ORF is shorter
uc001blr.2,uc001blt.1	uc001blt.1	uc001blr.2	chr1:26560693..26605299,+	CCDC21	KIRP_ctrl	KIRP_cancer	ORF_seq_similarity	TRUE	ORF is shorter
uc001blz.1,uc001blv.2	uc001blv.2	uc001blz.1	chr1:26608773..26644756,-	UBXN11	KICH_ctrl	KICH_cancer	intron_retention	TRUE	Intron retention gain
uc001blv.2,uc010ofc.1	uc010ofc.1	uc001blv.2	chr1:26608773..26644756,-	UBXN11	KIRC_ctrl	KIRC_cancer	intron_retention	TRUE	Intron retention switch
uc001blv.2,uc010ofc.1	uc010ofc.1	uc001blv.2	chr1:26608773..26644756,-	UBXN11	KIRC_ctrl	KIRC_cancer	ORF_seq_similarity	TRUE	ORF is shorter
uc001bmr.1,uc010ofe.1	uc010ofe.1	uc001bmr.1	chr1:26856249..26901520,+	RPS6KA1	COAD_ctrl	COAD_cancer	ORF_seq_similarity	TRUE	ORF is shorter
uc001bmr.1,uc010ofe.1	uc010ofe.1	uc001bmr.1	chr1:26856249..26901520,+	RPS6KA1	KICH_ctrl	KICH_cancer	ORF_seq_similarity	TRUE	ORF is shorter
uc001bmr.1,uc010ofe.1	uc010ofe.1	uc001bmr.1	chr1:26856249..26901520,+	RPS6KA1	KIRC_ctrl	KIRC_cancer	ORF_seq_similarity	TRUE	ORF is shorter
uc001bmr.1,uc010ofe.1	uc010ofe.1	uc001bmr.1	chr1:26856249..26901520,+	RPS6KA1	KIRP_ctrl	KIRP_cancer	ORF_seq_similarity	TRUE	ORF is shorter
uc001bms.1,uc010ofe.1	uc010ofe.1	uc001bms.1	chr1:26856249..26901520,+	RPS6KA1	LUAD_ctrl	LUAD_cancer	ORF_seq_similarity	TRUE	ORF is shorter
uc001bms.1,uc010ofe.1	uc010ofe.1	uc001bms.1	chr1:26856249..26901520,+	RPS6KA1	LUSC_ctrl	LUSC_cancer	ORF_seq_similarity	TRUE	ORF is shorter
uc001bmr.1,uc010ofe.1	uc010ofe.1	uc001bmr.1	chr1:26856249..26901520,+	RPS6KA1	THCA_ctrl	THCA_cancer	ORF_seq_similarity	TRUE	ORF is shorter
uc010ofh.1,uc001bnb.2	uc001bnb.2	uc010ofh.1	chr1:27153201..27182207,+	ZDHHC18	STAD_ctrl	STAD_cancer	ORF_seq_similarity	TRUE	ORF is longer
uc001bnm.2,uc001bnl.2	uc001bnl.2	uc001bnm.2	chr1:27425301..27481451,-	SLC9A1	COAD_ctrl	COAD_cancer	ORF_seq_similarity	TRUE	ORF is shorter
uc001bnm.2,uc001bnl.2	uc001bnl.2	uc001bnm.2	chr1:27425301..27481451,-	SLC9A1	COAD_ctrl	COAD_cancer	domains_identified	TRUE	Domain loss
uc001bnm.2,uc001bnl.2	uc001bnl.2	uc001bnm.2	chr1:27425301..27481451,-	SLC9A1	KIRP_ctrl	KIRP_cancer	ORF_seq_similarity	TRUE	ORF is shorter
uc001bnm.2,uc001bnl.2	uc001bnl.2	uc001bnm.2	chr1:27425301..27481451,-	SLC9A1	KIRP_ctrl	KIRP_cancer	domains_identified	TRUE	Domain loss
uc001bnm.2,uc001bnl.2	uc001bnl.2	uc001bnm.2	chr1:27425301..27481451,-	SLC9A1	THCA_ctrl	THCA_cancer	ORF_seq_similarity	TRUE	ORF is shorter
uc001bnm.2,uc001bnl.2	uc001bnl.2	uc001bnm.2	chr1:27425301..27481451,-	SLC9A1	THCA_ctrl	THCA_cancer	domains_identified	TRUE	Domain loss
uc001bom.2,uc001boi.2	uc001boi.2	uc001bom.2	chr1:27938803..27961727,-	FGR	KICH_ctrl	KICH_cancer	ORF_seq_similarity	TRUE	ORF is shorter
uc001bom.2,uc001boi.2	uc001boi.2	uc001bom.2	chr1:27938803..27961727,-	FGR	KICH_ctrl	KICH_cancer	domains_identified	TRUE	Domain loss
uc001bom.2,uc001boi.2	uc001boi.2	uc001bom.2	chr1:27938803..27961727,-	FGR	KIRP_ctrl	KIRP_cancer	ORF_seq_similarity	TRUE	ORF is shorter
uc001bom.2,uc001boi.2	uc001boi.2	uc001bom.2	chr1:27938803..27961727,-	FGR	KIRP_ctrl	KIRP_cancer	domains_identified	TRUE	Domain loss
uc001bpr.2,uc001bpq.2	uc001bpq.2	uc001bpr.2	chr1:28562611..28564609,+	ATPIF1	KIRC_ctrl	KIRC_cancer	intron_retention	TRUE	Intron retention loss
uc001bpr.2,uc001bpq.2	uc001bpq.2	uc001bpr.2	chr1:28562611..28564609,+	ATPIF1	KIRC_ctrl	KIRC_cancer	coding_potential	TRUE	Transcript is coding
uc001bpr.2,uc001bpq.2	uc001bpq.2	uc001bpr.2	chr1:28562611..28564609,+	ATPIF1	KIRC_ctrl	KIRC_cancer	ORF_seq_similarity	TRUE	ORF is longer
uc001bpy.2,uc001bpz.2	uc001bpz.2	uc001bpy.2	chr1:28696093..28826880,+	PHACTR4	KIRP_ctrl	KIRP_cancer	intron_retention	TRUE	Intron retention loss
uc001bpy.2,uc001bpz.2	uc001bpz.2	uc001bpy.2	chr1:28696093..28826880,+	PHACTR4	KIRP_ctrl	KIRP_cancer	coding_potential	TRUE	Transcript is Noncoding
uc001bpy.2,uc001bpz.2	uc001bpz.2	uc001bpy.2	chr1:28696093..28826880,+	PHACTR4	KIRP_ctrl	KIRP_cancer	ORF_seq_similarity	TRUE	Complete ORF loss
uc001bpy.2,uc001bpz.2	uc001bpz.2	uc001bpy.2	chr1:28696093..28826880,+	PHACTR4	KIRP_ctrl	KIRP_cancer	domains_identified	TRUE	Domain loss
uc001brj.1,uc001brl.1	uc001brl.1	uc001brj.1	chr1:29213628..29446958,+	EPB41	LUSC_ctrl	LUSC_cancer	ORF_seq_similarity	TRUE	ORF is longer
uc001brj.1,uc009vtn.1	uc009vtn.1	uc001brj.1	chr1:29213628..29446958,+	EPB41	THCA_ctrl	THCA_cancer	coding_potential	TRUE	Transcript is Noncoding
uc001brj.1,uc009vtn.1	uc009vtn.1	uc001brj.1	chr1:29213628..29446958,+	EPB41	THCA_ctrl	THCA_cancer	ORF_seq_similarity	TRUE	Complete ORF loss
uc001brj.1,uc009vtn.1	uc009vtn.1	uc001brj.1	chr1:29213628..29446958,+	EPB41	THCA_ctrl	THCA_cancer	domains_identified	TRUE	Domain loss
uc001brw.2,uc001brx.2	uc001brx.2	uc001brw.2	chr1:29563047..29653315,+	PTPRU	STAD_ctrl	STAD_cancer	ORF_seq_similarity	TRUE	ORF is shorter
uc001brw.2,uc001brx.2	uc001brx.2	uc001brw.2	chr1:29563047..29653315,+	PTPRU	STAD_ctrl	STAD_cancer	domains_identified	TRUE	Domain loss
uc001brw.2,uc001brx.2	uc001brx.2	uc001brw.2	chr1:29563047..29653315,+	PTPRU	STAD_ctrl	STAD_cancer	signal_peptide_identified	TRUE	Signal peptide loss
uc010ogc.1,uc001bsn.2	uc001bsn.2	uc010ogc.1	chr1:31652593..31712400,-	NKAIN1	BRCA_ctrl	BRCA_cancer	ORF_seq_similarity	TRUE	ORF is longer
uc001btg.1,uc001bth.1	uc001bth.1	uc001btg.1	chr1:32095468..32110477,-	PEF1	LIHC_ctrl	LIHC_cancer	ORF_seq_similarity	TRUE	ORF is longer
uc001btk.1,uc001bti.1	uc001bti.1	uc001btk.1	chr1:32117848..32169768,-	COL16A1	KICH_ctrl	KICH_cancer	ORF_seq_similarity	TRUE	ORF is shorter
uc001btk.1,uc001bti.1	uc001bti.1	uc001btk.1	chr1:32117848..32169768,-	COL16A1	KICH_ctrl	KICH_cancer	domains_identified	TRUE	Domain loss
uc001btk.1,uc001bti.1	uc001bti.1	uc001btk.1	chr1:32117848..32169768,-	COL16A1	KICH_ctrl	KICH_cancer	signal_peptide_identified	TRUE	Signal peptide loss
uc001btk.1,uc001bti.1	uc001bti.1	uc001btk.1	chr1:32117848..32169768,-	COL16A1	KIRC_ctrl	KIRC_cancer	ORF_seq_similarity	TRUE	ORF is shorter
uc001btk.1,uc001bti.1	uc001bti.1	uc001btk.1	chr1:32117848..32169768,-	COL16A1	KIRC_ctrl	KIRC_cancer	domains_identified	TRUE	Domain loss
uc001btk.1,uc001bti.1	uc001bti.1	uc001btk.1	chr1:32117848..32169768,-	COL16A1	KIRC_ctrl	KIRC_cancer	signal_peptide_identified	TRUE	Signal peptide loss
uc001btt.2,uc001btr.1	uc001btr.1	uc001btt.2	chr1:32256025..32281580,-	SPOCD1	LUSC_ctrl	LUSC_cancer	intron_retention	TRUE	Intron retention gain
uc001btt.2,uc001btr.1	uc001btr.1	uc001btt.2	chr1:32256025..32281580,-	SPOCD1	LUSC_ctrl	LUSC_cancer	ORF_seq_similarity	TRUE	ORF is shorter
uc001btt.2,uc001btr.1	uc001btr.1	uc001btt.2	chr1:32256025..32281580,-	SPOCD1	LUSC_ctrl	LUSC_cancer	domains_identified	TRUE	Domain loss
uc010ogv.1,uc001buf.3	uc001buf.3	uc010ogv.1	chr1:32538503..32568465,+	TMEM39B	COAD_ctrl	COAD_cancer	ORF_seq_similarity	TRUE	ORF is shorter
uc010ogv.1,uc001buf.3	uc001buf.3	uc010ogv.1	chr1:32538503..32568465,+	TMEM39B	LUAD_ctrl	LUAD_cancer	ORF_seq_similarity	TRUE	ORF is shorter
uc010ogv.1,uc001buf.3	uc001buf.3	uc010ogv.1	chr1:32538503..32568465,+	TMEM39B	THCA_ctrl	THCA_cancer	ORF_seq_similarity	TRUE	ORF is shorter
uc001bug.2,uc009vtz.2	uc009vtz.2	uc001bug.2	chr1:32573644..32642166,+	KPNA6	KIRC_ctrl	KIRC_cancer	ORF_seq_similarity	TRUE	ORF is shorter
uc001bug.2,uc009vtz.2	uc009vtz.2	uc001bug.2	chr1:32573644..32642166,+	KPNA6	KIRC_ctrl	KIRC_cancer	domains_identified	TRUE	Domain loss
uc001bug.2,uc009vtz.2	uc009vtz.2	uc001bug.2	chr1:32573644..32642166,+	KPNA6	THCA_ctrl	THCA_cancer	ORF_seq_similarity	TRUE	ORF is shorter
uc001bug.2,uc009vtz.2	uc009vtz.2	uc001bug.2	chr1:32573644..32642166,+	KPNA6	THCA_ctrl	THCA_cancer	domains_identified	TRUE	Domain loss
uc010ohm.1,uc010ohn.1	uc010ohn.1	uc010ohm.1	chr1:33207512..33240571,+	KIAA1522	KIRC_ctrl	KIRC_cancer	ORF_seq_similarity	TRUE	ORF is shorter
uc010ohm.1,uc010ohn.1	uc010ohn.1	uc010ohm.1	chr1:33207512..33240571,+	KIAA1522	KIRP_ctrl	KIRP_cancer	ORF_seq_similarity	TRUE	ORF is shorter
uc001akg.3,uc010nzh.1	uc010nzh.1	uc001akg.3	chr1:3371147..3397675,+	ARHGEF16	KIRC_ctrl	KIRC_cancer	intron_retention	TRUE	Intron retention gain
uc001akg.3,uc010nzh.1	uc010nzh.1	uc001akg.3	chr1:3371147..3397675,+	ARHGEF16	KIRC_ctrl	KIRC_cancer	ORF_seq_similarity	TRUE	ORF is shorter
uc001akg.3,uc010nzh.1	uc010nzh.1	uc001akg.3	chr1:3371147..3397675,+	ARHGEF16	KIRC_ctrl	KIRC_cancer	NMD_status	TRUE	NMD insensitive
uc001akl.2,uc001akk.2	uc001akk.2	uc001akl.2	chr1:3404513..3528059,-	MEGF6	LUAD_ctrl	LUAD_cancer	ORF_seq_similarity	TRUE	ORF is shorter
uc001akl.2,uc001akk.2	uc001akk.2	uc001akl.2	chr1:3404513..3528059,-	MEGF6	LUAD_ctrl	LUAD_cancer	domains_identified	TRUE	Domain loss
uc001akl.2,uc001akk.2	uc001akk.2	uc001akl.2	chr1:3404513..3528059,-	MEGF6	LUSC_ctrl	LUSC_cancer	ORF_seq_similarity	TRUE	ORF is shorter
uc001akl.2,uc001akk.2	uc001akk.2	uc001akl.2	chr1:3404513..3528059,-	MEGF6	LUSC_ctrl	LUSC_cancer	domains_identified	TRUE	Domain loss
uc010nzk.1,uc001akp.2	uc001akp.2	uc010nzk.1	chr1:3569129..3650467,+	TP73	HNSC_ctrl	HNSC_cancer	ORF_seq_similarity	TRUE	ORF is longer
uc001byt.2,uc001byu.2	uc001byu.2	uc001byt.2	chr1:35734568..35887544,+	ZMYM4	THCA_ctrl	THCA_cancer	ORF_seq_similarity	TRUE	ORF is shorter
uc001byx.2,uc001byw.2	uc001byw.2	uc001byx.2	chr1:35899092..36023551,-	KIAA0319L	STAD_ctrl	STAD_cancer	ORF_seq_similarity	TRUE	ORF is shorter
uc001byx.2,uc001byw.2	uc001byw.2	uc001byx.2	chr1:35899092..36023551,-	KIAA0319L	STAD_ctrl	STAD_cancer	domains_identified	TRUE	Domain gain
uc001byx.2,uc001byw.2	uc001byw.2	uc001byx.2	chr1:35899092..36023551,-	KIAA0319L	THCA_ctrl	THCA_cancer	ORF_seq_similarity	TRUE	ORF is shorter
uc001byx.2,uc001byw.2	uc001byw.2	uc001byx.2	chr1:35899092..36023551,-	KIAA0319L	THCA_ctrl	THCA_cancer	domains_identified	TRUE	Domain gain
uc001bzl.2,uc009vuy.2	uc009vuy.2	uc001bzl.2	chr1:36335409..36389897,+	EIF2C1	THCA_ctrl	THCA_cancer	ORF_seq_similarity	TRUE	Complete ORF loss
uc001bzl.2,uc009vuy.2	uc009vuy.2	uc001bzl.2	chr1:36335409..36389897,+	EIF2C1	THCA_ctrl	THCA_cancer	domains_identified	TRUE	Domain loss
uc001akt.3,uc009vlm.2	uc009vlm.2	uc001akt.3	chr1:3652550..3663886,-	KIAA0495	KICH_ctrl	KICH_cancer	intron_retention	TRUE	Intron retention gain
uc001akt.3,uc009vlm.2	uc009vlm.2	uc001akt.3	chr1:3652550..3663886,-	KIAA0495	KICH_ctrl	KICH_cancer	coding_potential	TRUE	Transcript is coding
uc001akt.3,uc009vlm.2	uc009vlm.2	uc001akt.3	chr1:3652550..3663886,-	KIAA0495	KICH_ctrl	KICH_cancer	ORF_seq_similarity	TRUE	Complete ORF gain
uc001bzv.1,uc001bzw.1	uc001bzw.1	uc001bzv.1	chr1:36560846..36565850,-	COL8A2	THCA_ctrl	THCA_cancer	signal_peptide_identified	TRUE	Signal peptide loss
uc010oia.1,uc010oib.1	uc010oib.1	uc010oia.1	chr1:36771994..36790484,+	C1orf113	KIRP_ctrl	KIRP_cancer	ORF_seq_similarity	TRUE	ORF is shorter
uc010oia.1,uc010oib.1	uc010oib.1	uc010oia.1	chr1:36771994..36790484,+	C1orf113	KIRP_ctrl	KIRP_cancer	domains_identified	TRUE	Domain loss
uc001aky.2,uc010nzm.1	uc010nzm.1	uc001aky.2	chr1:3728645..3773797,-	KIAA0562	BRCA_ctrl	BRCA_cancer	intron_retention	TRUE	Intron retention loss
uc001aky.2,uc010nzm.1	uc010nzm.1	uc001aky.2	chr1:3728645..3773797,-	KIAA0562	BRCA_ctrl	BRCA_cancer	ORF_seq_similarity	TRUE	Complete ORF loss
uc001aky.2,uc010nzm.1	uc010nzm.1	uc001aky.2	chr1:3728645..3773797,-	KIAA0562	COAD_ctrl	COAD_cancer	intron_retention	TRUE	Intron retention loss
uc001aky.2,uc010nzm.1	uc010nzm.1	uc001aky.2	chr1:3728645..3773797,-	KIAA0562	COAD_ctrl	COAD_cancer	ORF_seq_similarity	TRUE	Complete ORF loss
uc001aky.2,uc010nzm.1	uc010nzm.1	uc001aky.2	chr1:3728645..3773797,-	KIAA0562	HNSC_ctrl	HNSC_cancer	intron_retention	TRUE	Intron retention loss
uc001aky.2,uc010nzm.1	uc010nzm.1	uc001aky.2	chr1:3728645..3773797,-	KIAA0562	HNSC_ctrl	HNSC_cancer	ORF_seq_similarity	TRUE	Complete ORF loss
uc001aky.2,uc010nzm.1	uc010nzm.1	uc001aky.2	chr1:3728645..3773797,-	KIAA0562	LUAD_ctrl	LUAD_cancer	intron_retention	TRUE	Intron retention loss
uc001aky.2,uc010nzm.1	uc010nzm.1	uc001aky.2	chr1:3728645..3773797,-	KIAA0562	LUAD_ctrl	LUAD_cancer	ORF_seq_similarity	TRUE	Complete ORF loss
uc001aky.2,uc010nzm.1	uc010nzm.1	uc001aky.2	chr1:3728645..3773797,-	KIAA0562	LUSC_ctrl	LUSC_cancer	intron_retention	TRUE	Intron retention loss
uc001aky.2,uc010nzm.1	uc010nzm.1	uc001aky.2	chr1:3728645..3773797,-	KIAA0562	LUSC_ctrl	LUSC_cancer	ORF_seq_similarity	TRUE	Complete ORF loss
uc001ccg.1,uc001ccf.1	uc001ccf.1	uc001ccg.1	chr1:38326369..38412729,-	INPP5B	BRCA_ctrl	BRCA_cancer	ORF_seq_similarity	TRUE	ORF is shorter
uc001ccg.1,uc001ccf.1	uc001ccf.1	uc001ccg.1	chr1:38326369..38412729,-	INPP5B	COAD_ctrl	COAD_cancer	ORF_seq_similarity	TRUE	ORF is shorter
uc010ois.1,uc001cdf.1	uc001cdf.1	uc010ois.1	chr1:39547118..39952789,+	MACF1	KIRC_ctrl	KIRC_cancer	ORF_seq_similarity	TRUE	ORF is shorter
uc010ois.1,uc001cdf.1	uc001cdf.1	uc010ois.1	chr1:39547118..39952789,+	MACF1	KIRC_ctrl	KIRC_cancer	domains_identified	TRUE	Domain loss
uc001cfb.2,uc010ojf.1	uc010ojf.1	uc001cfb.2	chr1:40538382..40563142,-	PPT1	KICH_ctrl	KICH_cancer	ORF_seq_similarity	TRUE	ORF is shorter
uc001cfb.2,uc010ojf.1	uc010ojf.1	uc001cfb.2	chr1:40538382..40563142,-	PPT1	KICH_ctrl	KICH_cancer	signal_peptide_identified	TRUE	Signal peptide loss
uc001cfb.2,uc010ojf.1	uc010ojf.1	uc001cfb.2	chr1:40538382..40563142,-	PPT1	KIRC_ctrl	KIRC_cancer	ORF_seq_similarity	TRUE	ORF is shorter
uc001cfb.2,uc010ojf.1	uc010ojf.1	uc001cfb.2	chr1:40538382..40563142,-	PPT1	KIRC_ctrl	KIRC_cancer	signal_peptide_identified	TRUE	Signal peptide loss
uc001cfb.2,uc010ojf.1	uc010ojf.1	uc001cfb.2	chr1:40538382..40563142,-	PPT1	KIRP_ctrl	KIRP_cancer	ORF_seq_similarity	TRUE	ORF is shorter
uc001cfb.2,uc010ojf.1	uc010ojf.1	uc001cfb.2	chr1:40538382..40563142,-	PPT1	KIRP_ctrl	KIRP_cancer	signal_peptide_identified	TRUE	Signal peptide loss
uc001cfc.3,uc001cfd.3	uc001cfd.3	uc001cfc.3	chr1:40627041..40706592,+	RLF	THCA_ctrl	THCA_cancer	ORF_seq_similarity	TRUE	ORF is shorter
uc001cfj.2,uc010ojj.1	uc010ojj.1	uc001cfj.2	chr1:40839728..40888992,+	SMAP2	KICH_ctrl	KICH_cancer	ORF_seq_similarity	TRUE	ORF is shorter
uc001cfj.2,uc010ojj.1	uc010ojj.1	uc001cfj.2	chr1:40839728..40888992,+	SMAP2	KICH_ctrl	KICH_cancer	domains_identified	TRUE	Domain loss
uc001cfj.2,uc010ojj.1	uc010ojj.1	uc001cfj.2	chr1:40839728..40888992,+	SMAP2	KIRP_ctrl	KIRP_cancer	ORF_seq_similarity	TRUE	ORF is shorter
uc001cfj.2,uc010ojj.1	uc010ojj.1	uc001cfj.2	chr1:40839728..40888992,+	SMAP2	KIRP_ctrl	KIRP_cancer	domains_identified	TRUE	Domain loss
uc010ojq.1,uc001cgl.3	uc001cgl.3	uc010ojq.1	chr1:41445007..41478231,+	CTPS	LIHC_ctrl	LIHC_cancer	ORF_seq_similarity	TRUE	ORF is longer
uc001chk.2,uc001chl.2	uc001chl.2	uc001chk.2	chr1:42922173..42926085,+	PPCS	BRCA_ctrl	BRCA_cancer	ORF_seq_similarity	TRUE	ORF is longer
uc001chk.2,uc001chl.2	uc001chl.2	uc001chk.2	chr1:42922173..42926085,+	PPCS	BRCA_ctrl	BRCA_cancer	domains_identified	TRUE	Domain gain
uc001chk.2,uc001chl.2	uc001chl.2	uc001chk.2	chr1:42922173..42926085,+	PPCS	HNSC_ctrl	HNSC_cancer	ORF_seq_similarity	TRUE	ORF is longer
uc001chk.2,uc001chl.2	uc001chl.2	uc001chk.2	chr1:42922173..42926085,+	PPCS	HNSC_ctrl	HNSC_cancer	domains_identified	TRUE	Domain gain
uc001chk.2,uc001chl.2	uc001chl.2	uc001chk.2	chr1:42922173..42926085,+	PPCS	LUSC_ctrl	LUSC_cancer	ORF_seq_similarity	TRUE	ORF is longer
uc001chk.2,uc001chl.2	uc001chl.2	uc001chk.2	chr1:42922173..42926085,+	PPCS	LUSC_ctrl	LUSC_cancer	domains_identified	TRUE	Domain gain
uc001ciu.2,uc010okg.1	uc010okg.1	uc001ciu.2	chr1:43766664..43788778,+	TIE1	KICH_ctrl	KICH_cancer	ORF_seq_similarity	TRUE	ORF is shorter
uc001ciu.2,uc010okg.1	uc010okg.1	uc001ciu.2	chr1:43766664..43788778,+	TIE1	KICH_ctrl	KICH_cancer	domains_identified	TRUE	Domain loss
uc001ciu.2,uc010okg.1	uc010okg.1	uc001ciu.2	chr1:43766664..43788778,+	TIE1	KICH_ctrl	KICH_cancer	signal_peptide_identified	TRUE	Signal peptide loss
uc001ciu.2,uc010okg.1	uc010okg.1	uc001ciu.2	chr1:43766664..43788778,+	TIE1	KIRC_ctrl	KIRC_cancer	ORF_seq_similarity	TRUE	ORF is shorter
uc001ciu.2,uc010okg.1	uc010okg.1	uc001ciu.2	chr1:43766664..43788778,+	TIE1	KIRC_ctrl	KIRC_cancer	domains_identified	TRUE	Domain loss
uc001ciu.2,uc010okg.1	uc010okg.1	uc001ciu.2	chr1:43766664..43788778,+	TIE1	KIRC_ctrl	KIRC_cancer	signal_peptide_identified	TRUE	Signal peptide loss
uc001ciu.2,uc010okg.1	uc010okg.1	uc001ciu.2	chr1:43766664..43788778,+	TIE1	KIRP_ctrl	KIRP_cancer	ORF_seq_similarity	TRUE	ORF is shorter
uc001ciu.2,uc010okg.1	uc010okg.1	uc001ciu.2	chr1:43766664..43788778,+	TIE1	KIRP_ctrl	KIRP_cancer	domains_identified	TRUE	Domain loss
uc001ciu.2,uc010okg.1	uc010okg.1	uc001ciu.2	chr1:43766664..43788778,+	TIE1	KIRP_ctrl	KIRP_cancer	signal_peptide_identified	TRUE	Signal peptide loss
uc001ciu.2,uc010okg.1	uc010okg.1	uc001ciu.2	chr1:43766664..43788778,+	TIE1	LUAD_ctrl	LUAD_cancer	ORF_seq_similarity	TRUE	ORF is shorter
uc001ciu.2,uc010okg.1	uc010okg.1	uc001ciu.2	chr1:43766664..43788778,+	TIE1	LUAD_ctrl	LUAD_cancer	domains_identified	TRUE	Domain loss
uc001ciu.2,uc010okg.1	uc010okg.1	uc001ciu.2	chr1:43766664..43788778,+	TIE1	LUAD_ctrl	LUAD_cancer	signal_peptide_identified	TRUE	Signal peptide loss
uc001ciu.2,uc010okg.1	uc010okg.1	uc001ciu.2	chr1:43766664..43788778,+	TIE1	LUSC_ctrl	LUSC_cancer	ORF_seq_similarity	TRUE	ORF is shorter
uc001ciu.2,uc010okg.1	uc010okg.1	uc001ciu.2	chr1:43766664..43788778,+	TIE1	LUSC_ctrl	LUSC_cancer	domains_identified	TRUE	Domain loss
uc001ciu.2,uc010okg.1	uc010okg.1	uc001ciu.2	chr1:43766664..43788778,+	TIE1	LUSC_ctrl	LUSC_cancer	signal_peptide_identified	TRUE	Signal peptide loss
uc001cjs.2,uc001cjw.2	uc001cjw.2	uc001cjs.2	chr1:43996547..44089342,+	PTPRF	THCA_ctrl	THCA_cancer	ORF_seq_similarity	TRUE	ORF is shorter
uc001cjs.2,uc001cjw.2	uc001cjw.2	uc001cjs.2	chr1:43996547..44089342,+	PTPRF	THCA_ctrl	THCA_cancer	domains_identified	TRUE	Domain loss
uc001cjs.2,uc001cjw.2	uc001cjw.2	uc001cjs.2	chr1:43996547..44089342,+	PTPRF	THCA_ctrl	THCA_cancer	signal_peptide_identified	TRUE	Signal peptide loss
uc001cjx.2,uc010oki.1	uc010oki.1	uc001cjx.2	chr1:44115797..44171188,+	KDM4A	KIRP_ctrl	KIRP_cancer	ORF_seq_similarity	TRUE	ORF is shorter
uc001cjx.2,uc010oki.1	uc010oki.1	uc001cjx.2	chr1:44115797..44171188,+	KDM4A	KIRP_ctrl	KIRP_cancer	domains_identified	TRUE	Domain loss
uc001ckc.2,uc009vwy.2	uc009vwy.2	uc001ckc.2	chr1:44171495..44396830,+	ST3GAL3	BRCA_ctrl	BRCA_cancer	ORF_seq_similarity	TRUE	ORF is shorter
uc001ckc.2,uc009vwy.2	uc009vwy.2	uc001ckc.2	chr1:44171495..44396830,+	ST3GAL3	THCA_ctrl	THCA_cancer	ORF_seq_similarity	TRUE	ORF is shorter
uc001clj.2,uc009vxc.2	uc009vxc.2	uc001clj.2	chr1:44457280..44462196,+	CCDC24	LUAD_ctrl	LUAD_cancer	ORF_seq_similarity	TRUE	ORF is shorter
uc001clj.2,uc009vxc.2	uc009vxc.2	uc001clj.2	chr1:44457280..44462196,+	CCDC24	LUSC_ctrl	LUSC_cancer	ORF_seq_similarity	TRUE	ORF is shorter
uc001cmc.2,uc001cmb.1	uc001cmb.1	uc001cmc.2	chr1:45100939..45140099,-	TMEM53	KIRC_ctrl	KIRC_cancer	ORF_seq_similarity	TRUE	ORF is shorter
uc001coj.1,uc001coi.1	uc001coi.1	uc001coj.1	chr1:46049717..46084567,+	NASP	BRCA_ctrl	BRCA_cancer	ORF_seq_similarity	TRUE	ORF is longer
uc001coj.1,uc001coi.1	uc001coi.1	uc001coj.1	chr1:46049717..46084567,+	NASP	KIRC_ctrl	KIRC_cancer	ORF_seq_similarity	TRUE	ORF is longer
uc001coj.1,uc001coi.1	uc001coi.1	uc001coj.1	chr1:46049717..46084567,+	NASP	KIRP_ctrl	KIRP_cancer	ORF_seq_similarity	TRUE	ORF is longer
uc001coj.1,uc001coi.1	uc001coi.1	uc001coj.1	chr1:46049717..46084567,+	NASP	LIHC_ctrl	LIHC_cancer	ORF_seq_similarity	TRUE	ORF is longer
uc001coj.1,uc001coi.1	uc001coi.1	uc001coj.1	chr1:46049717..46084567,+	NASP	LUAD_ctrl	LUAD_cancer	ORF_seq_similarity	TRUE	ORF is longer
uc001cpb.3,uc010olv.1	uc010olv.1	uc001cpb.3	chr1:46505813..46642160,-	PIK3R3	KICH_ctrl	KICH_cancer	intron_retention	TRUE	Intron retention loss
uc001cpb.3,uc010olv.1	uc010olv.1	uc001cpb.3	chr1:46505813..46642160,-	PIK3R3	KICH_ctrl	KICH_cancer	ORF_seq_similarity	TRUE	ORF is shorter
uc001cpb.3,uc010olv.1	uc010olv.1	uc001cpb.3	chr1:46505813..46642160,-	PIK3R3	KICH_ctrl	KICH_cancer	domains_identified	TRUE	Domain loss
uc001cpb.3,uc010olv.1	uc010olv.1	uc001cpb.3	chr1:46505813..46642160,-	PIK3R3	THCA_ctrl	THCA_cancer	intron_retention	TRUE	Intron retention loss
uc001cpb.3,uc010olv.1	uc010olv.1	uc001cpb.3	chr1:46505813..46642160,-	PIK3R3	THCA_ctrl	THCA_cancer	ORF_seq_similarity	TRUE	ORF is shorter
uc001cpb.3,uc010olv.1	uc010olv.1	uc001cpb.3	chr1:46505813..46642160,-	PIK3R3	THCA_ctrl	THCA_cancer	domains_identified	TRUE	Domain loss
uc001cqr.2,uc001cqs.2	uc001cqs.2	uc001cqr.2	chr1:47427036..47516422,+	CYP4X1	LIHC_ctrl	LIHC_cancer	ORF_seq_similarity	TRUE	ORF is shorter
uc009vyx.1,uc010onc.1	uc010onc.1	uc009vyx.1	chr1:50906935..51425936,-	FAF1	KIRP_ctrl	KIRP_cancer	ORF_seq_similarity	TRUE	ORF is shorter
uc009vyx.1,uc010onc.1	uc010onc.1	uc009vyx.1	chr1:50906935..51425936,-	FAF1	KIRP_ctrl	KIRP_cancer	domains_identified	TRUE	Domain loss
uc010one.1,uc001csj.2	uc001csj.2	uc010one.1	chr1:51752931..51810785,-	TTC39A	COAD_ctrl	COAD_cancer	ORF_seq_similarity	TRUE	ORF is shorter
uc010ond.1,uc001csj.2	uc001csj.2	uc010ond.1	chr1:51752931..51810785,-	TTC39A	LUSC_ctrl	LUSC_cancer	ORF_seq_similarity	TRUE	ORF is shorter
uc001csq.1,uc001csp.3	uc001csp.3	uc001csq.1	chr1:51819935..51984995,-	EPS15	KICH_ctrl	KICH_cancer	ORF_seq_similarity	TRUE	ORF is shorter
uc001csq.1,uc001csp.3	uc001csp.3	uc001csq.1	chr1:51819935..51984995,-	EPS15	KICH_ctrl	KICH_cancer	domains_identified	TRUE	Domain loss
uc001csq.1,uc001csp.3	uc001csp.3	uc001csq.1	chr1:51819935..51984995,-	EPS15	KIRC_ctrl	KIRC_cancer	ORF_seq_similarity	TRUE	ORF is shorter
uc001csq.1,uc001csp.3	uc001csp.3	uc001csq.1	chr1:51819935..51984995,-	EPS15	KIRC_ctrl	KIRC_cancer	domains_identified	TRUE	Domain loss
uc001csq.1,uc001csp.3	uc001csp.3	uc001csq.1	chr1:51819935..51984995,-	EPS15	KIRP_ctrl	KIRP_cancer	ORF_seq_similarity	TRUE	ORF is shorter
uc001csq.1,uc001csp.3	uc001csp.3	uc001csq.1	chr1:51819935..51984995,-	EPS15	KIRP_ctrl	KIRP_cancer	domains_identified	TRUE	Domain loss
uc001csq.1,uc001csp.3	uc001csp.3	uc001csq.1	chr1:51819935..51984995,-	EPS15	THCA_ctrl	THCA_cancer	ORF_seq_similarity	TRUE	ORF is shorter
uc001csq.1,uc001csp.3	uc001csp.3	uc001csq.1	chr1:51819935..51984995,-	EPS15	THCA_ctrl	THCA_cancer	domains_identified	TRUE	Domain loss
uc001ctd.3,uc009vzb.2	uc009vzb.2	uc001ctd.3	chr1:52254868..52344609,-	NRD1	KICH_ctrl	KICH_cancer	ORF_seq_similarity	TRUE	ORF is shorter
uc001ctd.3,uc009vzb.2	uc009vzb.2	uc001ctd.3	chr1:52254868..52344609,-	NRD1	STAD_ctrl	STAD_cancer	ORF_seq_similarity	TRUE	ORF is shorter
uc001ctd.3,uc009vzb.2	uc009vzb.2	uc001ctd.3	chr1:52254868..52344609,-	NRD1	THCA_ctrl	THCA_cancer	ORF_seq_similarity	TRUE	ORF is shorter
uc001cuj.2,uc009vzh.2	uc009vzh.2	uc001cuj.2	chr1:53192131..53293011,+	ZYG11B	COAD_ctrl	COAD_cancer	coding_potential	TRUE	Transcript is Noncoding
uc001cuj.2,uc009vzh.2	uc009vzh.2	uc001cuj.2	chr1:53192131..53293011,+	ZYG11B	COAD_ctrl	COAD_cancer	ORF_seq_similarity	TRUE	ORF is shorter
uc001cuj.2,uc009vzh.2	uc009vzh.2	uc001cuj.2	chr1:53192131..53293011,+	ZYG11B	THCA_ctrl	THCA_cancer	coding_potential	TRUE	Transcript is Noncoding
uc001cuj.2,uc009vzh.2	uc009vzh.2	uc001cuj.2	chr1:53192131..53293011,+	ZYG11B	THCA_ctrl	THCA_cancer	ORF_seq_similarity	TRUE	ORF is shorter
uc001cup.3,uc001cuo.3	uc001cuo.3	uc001cup.3	chr1:53361904..53392851,-	ECHDC2	KICH_ctrl	KICH_cancer	ORF_seq_similarity	TRUE	ORF is shorter
uc001cup.3,uc001cuo.3	uc001cuo.3	uc001cup.3	chr1:53361904..53392851,-	ECHDC2	KIRP_ctrl	KIRP_cancer	ORF_seq_similarity	TRUE	ORF is shorter
uc001cup.3,uc001cuo.3	uc001cuo.3	uc001cup.3	chr1:53361904..53392851,-	ECHDC2	LIHC_ctrl	LIHC_cancer	ORF_seq_similarity	TRUE	ORF is shorter
uc001cur.1,uc001cut.1	uc001cut.1	uc001cur.1	chr1:53392948..53517282,+	SCP2	BRCA_ctrl	BRCA_cancer	ORF_seq_similarity	TRUE	ORF is shorter
uc001cur.1,uc001cut.1	uc001cut.1	uc001cur.1	chr1:53392948..53517282,+	SCP2	BRCA_ctrl	BRCA_cancer	domains_identified	TRUE	Domain loss
uc001cur.1,uc001cut.1	uc001cut.1	uc001cur.1	chr1:53392948..53517282,+	SCP2	KIRP_ctrl	KIRP_cancer	ORF_seq_similarity	TRUE	ORF is shorter
uc001cur.1,uc001cut.1	uc001cut.1	uc001cur.1	chr1:53392948..53517282,+	SCP2	KIRP_ctrl	KIRP_cancer	domains_identified	TRUE	Domain loss
uc001cur.1,uc001cut.1	uc001cut.1	uc001cur.1	chr1:53392948..53517282,+	SCP2	LIHC_ctrl	LIHC_cancer	ORF_seq_similarity	TRUE	ORF is shorter
uc001cur.1,uc001cut.1	uc001cut.1	uc001cur.1	chr1:53392948..53517282,+	SCP2	LIHC_ctrl	LIHC_cancer	domains_identified	TRUE	Domain loss
uc001cur.1,uc001cut.1	uc001cut.1	uc001cur.1	chr1:53392948..53517282,+	SCP2	THCA_ctrl	THCA_cancer	ORF_seq_similarity	TRUE	ORF is shorter
uc001cur.1,uc001cut.1	uc001cut.1	uc001cur.1	chr1:53392948..53517282,+	SCP2	THCA_ctrl	THCA_cancer	domains_identified	TRUE	Domain loss
uc001cuv.2,uc010ons.1	uc010ons.1	uc001cuv.2	chr1:53527885..53551173,+	PODN	LIHC_ctrl	LIHC_cancer	ORF_seq_similarity	TRUE	ORF is shorter
uc001cuv.2,uc010ons.1	uc010ons.1	uc001cuv.2	chr1:53527885..53551173,+	PODN	LIHC_ctrl	LIHC_cancer	domains_identified	TRUE	Domain loss
uc010ooi.1,uc010ooj.1	uc010ooj.1	uc010ooi.1	chr1:55315300..55352921,-	DHCR24	KICH_ctrl	KICH_cancer	ORF_seq_similarity	TRUE	ORF is longer
uc010ooi.1,uc010ooj.1	uc010ooj.1	uc010ooi.1	chr1:55315300..55352921,-	DHCR24	KICH_ctrl	KICH_cancer	domains_identified	TRUE	Domain gain
uc001cyc.1,uc010ooi.1	uc010ooi.1	uc001cyc.1	chr1:55315300..55352921,-	DHCR24	THCA_ctrl	THCA_cancer	ORF_seq_similarity	TRUE	ORF is shorter
uc001cyc.1,uc010ooi.1	uc010ooi.1	uc001cyc.1	chr1:55315300..55352921,-	DHCR24	THCA_ctrl	THCA_cancer	domains_identified	TRUE	Domain loss
uc001cym.3,uc001cyl.2	uc001cyl.2	uc001cym.3	chr1:57184478..57285369,-	C1orf168	KICH_ctrl	KICH_cancer	ORF_seq_similarity	TRUE	Complete ORF loss
uc001cym.3,uc001cyl.2	uc001cyl.2	uc001cym.3	chr1:57184478..57285369,-	C1orf168	KICH_ctrl	KICH_cancer	domains_identified	TRUE	Domain loss
uc001czi.3,uc001czm.3	uc001czm.3	uc001czi.3	chr1:59762625..60228400,+	FGGY	COAD_ctrl	COAD_cancer	ORF_seq_similarity	TRUE	ORF is shorter
uc001czi.3,uc001czm.3	uc001czm.3	uc001czi.3	chr1:59762625..60228400,+	FGGY	COAD_ctrl	COAD_cancer	domains_identified	TRUE	Domain loss
uc001czi.3,uc001czm.3	uc001czm.3	uc001czi.3	chr1:59762625..60228400,+	FGGY	KIRC_ctrl	KIRC_cancer	ORF_seq_similarity	TRUE	ORF is shorter
uc001czi.3,uc001czm.3	uc001czm.3	uc001czi.3	chr1:59762625..60228400,+	FGGY	KIRC_ctrl	KIRC_cancer	domains_identified	TRUE	Domain loss
uc001czi.3,uc001czm.3	uc001czm.3	uc001czi.3	chr1:59762625..60228400,+	FGGY	KIRP_ctrl	KIRP_cancer	ORF_seq_similarity	TRUE	ORF is shorter
uc001czi.3,uc001czm.3	uc001czm.3	uc001czi.3	chr1:59762625..60228400,+	FGGY	KIRP_ctrl	KIRP_cancer	domains_identified	TRUE	Domain loss
uc001czi.3,uc001czm.3	uc001czm.3	uc001czi.3	chr1:59762625..60228400,+	FGGY	LIHC_ctrl	LIHC_cancer	ORF_seq_similarity	TRUE	ORF is shorter
uc001czi.3,uc001czm.3	uc001czm.3	uc001czi.3	chr1:59762625..60228400,+	FGGY	LIHC_ctrl	LIHC_cancer	domains_identified	TRUE	Domain loss
uc001czm.3,uc001czi.3	uc001czi.3	uc001czm.3	chr1:59762625..60228400,+	FGGY	LUAD_ctrl	LUAD_cancer	ORF_seq_similarity	TRUE	ORF is longer
uc001czm.3,uc001czi.3	uc001czi.3	uc001czm.3	chr1:59762625..60228400,+	FGGY	LUAD_ctrl	LUAD_cancer	domains_identified	TRUE	Domain gain
uc009wad.2,uc010oor.1	uc010oor.1	uc009wad.2	chr1:60280463..60342049,+	HOOK1	THCA_ctrl	THCA_cancer	intron_retention	TRUE	Intron retention loss
uc009vlw.1,uc001alw.1	uc001alw.1	uc009vlw.1	chr1:6052766..6160523,+	KCNAB2	KICH_ctrl	KICH_cancer	ORF_seq_similarity	TRUE	ORF is longer
uc009vlw.1,uc001alw.1	uc001alw.1	uc009vlw.1	chr1:6052766..6160523,+	KCNAB2	KIRC_ctrl	KIRC_cancer	ORF_seq_similarity	TRUE	ORF is longer
uc009vlw.1,uc001alw.1	uc001alw.1	uc009vlw.1	chr1:6052766..6160523,+	KCNAB2	KIRP_ctrl	KIRP_cancer	ORF_seq_similarity	TRUE	ORF is longer
uc009vlw.1,uc001alw.1	uc001alw.1	uc009vlw.1	chr1:6052766..6160523,+	KCNAB2	LIHC_ctrl	LIHC_cancer	ORF_seq_similarity	TRUE	ORF is longer
uc001czx.2,uc001czw.2	uc001czw.2	uc001czx.2	chr1:61542946..61928459,+	NFIA	LUAD_ctrl	LUAD_cancer	ORF_seq_similarity	TRUE	ORF is longer
uc001czx.2,uc001czw.2	uc001czw.2	uc001czx.2	chr1:61542946..61928459,+	NFIA	LUAD_ctrl	LUAD_cancer	domains_identified	TRUE	Domain gain
uc001czx.2,uc001czw.2	uc001czw.2	uc001czx.2	chr1:61542946..61928459,+	NFIA	LUSC_ctrl	LUSC_cancer	ORF_seq_similarity	TRUE	ORF is longer
uc001czx.2,uc001czw.2	uc001czw.2	uc001czx.2	chr1:61542946..61928459,+	NFIA	LUSC_ctrl	LUSC_cancer	domains_identified	TRUE	Domain gain
uc001dao.2,uc001dam.2	uc001dam.2	uc001dao.2	chr1:62920398..63153969,-	DOCK7	KIRP_ctrl	KIRP_cancer	ORF_seq_similarity	TRUE	ORF is shorter
uc001dao.2,uc001dam.2	uc001dam.2	uc001dao.2	chr1:62920398..63153969,-	DOCK7	KIRP_ctrl	KIRP_cancer	domains_identified	TRUE	Domain loss
uc001amr.2,uc010nzq.1	uc010nzq.1	uc001amr.2	chr1:6324333..6453826,-	ACOT7	COAD_ctrl	COAD_cancer	ORF_seq_similarity	TRUE	ORF is shorter
uc001amr.2,uc010nzq.1	uc010nzq.1	uc001amr.2	chr1:6324333..6453826,-	ACOT7	COAD_ctrl	COAD_cancer	domains_identified	TRUE	Domain loss
uc001amq.2,uc001ams.2	uc001ams.2	uc001amq.2	chr1:6324333..6453826,-	ACOT7	HNSC_ctrl	HNSC_cancer	ORF_seq_similarity	TRUE	ORF is longer
uc001amr.2,uc010nzq.1	uc010nzq.1	uc001amr.2	chr1:6324333..6453826,-	ACOT7	KICH_ctrl	KICH_cancer	ORF_seq_similarity	TRUE	ORF is shorter
uc001amr.2,uc010nzq.1	uc010nzq.1	uc001amr.2	chr1:6324333..6453826,-	ACOT7	KICH_ctrl	KICH_cancer	domains_identified	TRUE	Domain loss
uc001amr.2,uc010nzq.1	uc010nzq.1	uc001amr.2	chr1:6324333..6453826,-	ACOT7	KIRP_ctrl	KIRP_cancer	ORF_seq_similarity	TRUE	ORF is shorter
uc001amr.2,uc010nzq.1	uc010nzq.1	uc001amr.2	chr1:6324333..6453826,-	ACOT7	KIRP_ctrl	KIRP_cancer	domains_identified	TRUE	Domain loss
uc001amq.2,uc001ams.2	uc001ams.2	uc001amq.2	chr1:6324333..6453826,-	ACOT7	LUSC_ctrl	LUSC_cancer	ORF_seq_similarity	TRUE	ORF is longer
uc001amq.2,uc010nzq.1	uc010nzq.1	uc001amq.2	chr1:6324333..6453826,-	ACOT7	LUSC_ctrl	LUSC_cancer	ORF_seq_similarity	TRUE	ORF is shorter
uc001amq.2,uc010nzq.1	uc010nzq.1	uc001amq.2	chr1:6324333..6453826,-	ACOT7	LUSC_ctrl	LUSC_cancer	domains_identified	TRUE	Domain loss
uc001amq.2,uc001ams.2	uc001ams.2	uc001amq.2	chr1:6324333..6453826,-	ACOT7	THCA_ctrl	THCA_cancer	ORF_seq_similarity	TRUE	ORF is longer
uc001daz.2,uc010oow.1	uc010oow.1	uc001daz.2	chr1:63833261..63904232,+	ALG6	LIHC_ctrl	LIHC_cancer	ORF_seq_similarity	TRUE	Complete ORF gain
uc001daz.2,uc010oow.1	uc010oow.1	uc001daz.2	chr1:63833261..63904232,+	ALG6	LIHC_ctrl	LIHC_cancer	domains_identified	TRUE	Domain gain
uc001daz.2,uc010oow.1	uc010oow.1	uc001daz.2	chr1:63833261..63904232,+	ALG6	LIHC_ctrl	LIHC_cancer	signal_peptide_identified	TRUE	Signal peptide gain
uc001daz.2,uc010oow.1	uc010oow.1	uc001daz.2	chr1:63833261..63904232,+	ALG6	LUAD_ctrl	LUAD_cancer	ORF_seq_similarity	TRUE	Complete ORF gain
uc001daz.2,uc010oow.1	uc010oow.1	uc001daz.2	chr1:63833261..63904232,+	ALG6	LUAD_ctrl	LUAD_cancer	domains_identified	TRUE	Domain gain
uc001daz.2,uc010oow.1	uc010oow.1	uc001daz.2	chr1:63833261..63904232,+	ALG6	LUAD_ctrl	LUAD_cancer	signal_peptide_identified	TRUE	Signal peptide gain
uc001dbo.1,uc010opa.1	uc010opa.1	uc001dbo.1	chr1:64936476..65158741,+	CACHD1	KIRC_ctrl	KIRC_cancer	ORF_seq_similarity	TRUE	ORF is shorter
uc001dbo.1,uc010opa.1	uc010opa.1	uc001dbo.1	chr1:64936476..65158741,+	CACHD1	KIRC_ctrl	KIRC_cancer	domains_identified	TRUE	Domain loss
uc001dbo.1,uc010opa.1	uc010opa.1	uc001dbo.1	chr1:64936476..65158741,+	CACHD1	KIRP_ctrl	KIRP_cancer	ORF_seq_similarity	TRUE	ORF is shorter
uc001dbo.1,uc010opa.1	uc010opa.1	uc001dbo.1	chr1:64936476..65158741,+	CACHD1	KIRP_ctrl	KIRP_cancer	domains_identified	TRUE	Domain loss
uc001dbo.1,uc010opa.1	uc010opa.1	uc001dbo.1	chr1:64936476..65158741,+	CACHD1	THCA_ctrl	THCA_cancer	ORF_seq_similarity	TRUE	ORF is shorter
uc001dbo.1,uc010opa.1	uc010opa.1	uc001dbo.1	chr1:64936476..65158741,+	CACHD1	THCA_ctrl	THCA_cancer	domains_identified	TRUE	Domain loss
uc001ano.1,uc001anj.1	uc001anj.1	uc001ano.1	chr1:6526152..6580069,-	PLEKHG5	STAD_ctrl	STAD_cancer	intron_retention	TRUE	Intron retention gain
uc001ano.1,uc001anj.1	uc001anj.1	uc001ano.1	chr1:6526152..6580069,-	PLEKHG5	STAD_ctrl	STAD_cancer	ORF_seq_similarity	TRUE	ORF is shorter
uc001dbu.1,uc009wal.1	uc009wal.1	uc001dbu.1	chr1:65298906..65432619,-	JAK1	THCA_ctrl	THCA_cancer	ORF_seq_similarity	TRUE	ORF is shorter
uc001dbu.1,uc009wal.1	uc009wal.1	uc001dbu.1	chr1:65298906..65432619,-	JAK1	THCA_ctrl	THCA_cancer	domains_identified	TRUE	Domain loss
uc001dck.2,uc009wao.2	uc009wao.2	uc001dck.2	chr1:65886318..66102820,+	LEPR	COAD_ctrl	COAD_cancer	coding_potential	TRUE	Transcript is Noncoding
uc001dck.2,uc009wao.2	uc009wao.2	uc001dck.2	chr1:65886318..66102820,+	LEPR	COAD_ctrl	COAD_cancer	ORF_seq_similarity	TRUE	Complete ORF loss
uc001dck.2,uc009wao.2	uc009wao.2	uc001dck.2	chr1:65886318..66102820,+	LEPR	COAD_ctrl	COAD_cancer	domains_identified	TRUE	Domain loss
uc001dck.2,uc009wao.2	uc009wao.2	uc001dck.2	chr1:65886318..66102820,+	LEPR	HNSC_ctrl	HNSC_cancer	coding_potential	TRUE	Transcript is Noncoding
uc001dck.2,uc009wao.2	uc009wao.2	uc001dck.2	chr1:65886318..66102820,+	LEPR	HNSC_ctrl	HNSC_cancer	ORF_seq_similarity	TRUE	Complete ORF loss
uc001dck.2,uc009wao.2	uc009wao.2	uc001dck.2	chr1:65886318..66102820,+	LEPR	HNSC_ctrl	HNSC_cancer	domains_identified	TRUE	Domain loss
uc001dck.2,uc009wao.2	uc009wao.2	uc001dck.2	chr1:65886318..66102820,+	LEPR	LUAD_ctrl	LUAD_cancer	coding_potential	TRUE	Transcript is Noncoding
uc001dck.2,uc009wao.2	uc009wao.2	uc001dck.2	chr1:65886318..66102820,+	LEPR	LUAD_ctrl	LUAD_cancer	ORF_seq_similarity	TRUE	Complete ORF loss
uc001dck.2,uc009wao.2	uc009wao.2	uc001dck.2	chr1:65886318..66102820,+	LEPR	LUAD_ctrl	LUAD_cancer	domains_identified	TRUE	Domain loss
uc001dck.2,uc009wao.2	uc009wao.2	uc001dck.2	chr1:65886318..66102820,+	LEPR	LUSC_ctrl	LUSC_cancer	coding_potential	TRUE	Transcript is Noncoding
uc001dck.2,uc009wao.2	uc009wao.2	uc001dck.2	chr1:65886318..66102820,+	LEPR	LUSC_ctrl	LUSC_cancer	ORF_seq_similarity	TRUE	Complete ORF loss
uc001dck.2,uc009wao.2	uc009wao.2	uc001dck.2	chr1:65886318..66102820,+	LEPR	LUSC_ctrl	LUSC_cancer	domains_identified	TRUE	Domain loss
uc001dck.2,uc009wao.2	uc009wao.2	uc001dck.2	chr1:65886318..66102820,+	LEPR	STAD_ctrl	STAD_cancer	coding_potential	TRUE	Transcript is Noncoding
uc001dck.2,uc009wao.2	uc009wao.2	uc001dck.2	chr1:65886318..66102820,+	LEPR	STAD_ctrl	STAD_cancer	ORF_seq_similarity	TRUE	Complete ORF loss
uc001dck.2,uc009wao.2	uc009wao.2	uc001dck.2	chr1:65886318..66102820,+	LEPR	STAD_ctrl	STAD_cancer	domains_identified	TRUE	Domain loss
uc001dcx.2,uc009waw.2	uc009waw.2	uc001dcx.2	chr1:67278574..67390570,-	WDR78	KIRP_ctrl	KIRP_cancer	ORF_seq_similarity	TRUE	ORF is shorter
uc001des.2,uc001dew.2	uc001dew.2	uc001des.2	chr1:70671365..70717683,+	SFRS11	KIRC_ctrl	KIRC_cancer	intron_retention	TRUE	Intron retention gain
uc001des.2,uc001dew.2	uc001dew.2	uc001des.2	chr1:70671365..70717683,+	SFRS11	KIRC_ctrl	KIRC_cancer	ORF_seq_similarity	TRUE	ORF is shorter
uc001des.2,uc001dew.2	uc001dew.2	uc001des.2	chr1:70671365..70717683,+	SFRS11	KIRC_ctrl	KIRC_cancer	domains_identified	TRUE	Domain loss
uc001dfw.2,uc010oqs.1	uc010oqs.1	uc001dfw.2	chr1:71868626..72748405,-	NEGR1	STAD_ctrl	STAD_cancer	ORF_seq_similarity	TRUE	ORF is shorter
uc001dgj.2,uc001dgl.2	uc001dgl.2	uc001dgj.2	chr1:75171175..75199092,-	CRYZ	LUSC_ctrl	LUSC_cancer	ORF_seq_similarity	TRUE	ORF is shorter
uc001dgj.2,uc001dgl.2	uc001dgl.2	uc001dgj.2	chr1:75171175..75199092,-	CRYZ	LUSC_ctrl	LUSC_cancer	domains_identified	TRUE	Domain switch
uc001dgw.3,uc001dgx.3	uc001dgx.3	uc001dgw.3	chr1:76190043..76229353,+	ACADM	KICH_ctrl	KICH_cancer	ORF_seq_similarity	TRUE	ORF is shorter
uc001dhh.2,uc010orh.1	uc010orh.1	uc001dhh.2	chr1:76540389..77096669,+	ST6GALNAC3	THCA_ctrl	THCA_cancer	ORF_seq_similarity	TRUE	ORF is shorter
uc001dhq.2,uc001dhr.2	uc001dhr.2	uc001dhq.2	chr1:78030191..78149104,-	ZZZ3	KICH_ctrl	KICH_cancer	ORF_seq_similarity	TRUE	ORF is shorter
uc001dhq.2,uc001dhr.2	uc001dhr.2	uc001dhq.2	chr1:78030191..78149104,-	ZZZ3	KIRP_ctrl	KIRP_cancer	ORF_seq_similarity	TRUE	ORF is shorter
uc001dhq.2,uc001dhr.2	uc001dhr.2	uc001dhq.2	chr1:78030191..78149104,-	ZZZ3	THCA_ctrl	THCA_cancer	ORF_seq_similarity	TRUE	ORF is shorter
uc001dij.2,uc010orn.1	uc010orn.1	uc001dij.2	chr1:78444934..78482993,+	DNAJB4	LUAD_ctrl	LUAD_cancer	ORF_seq_similarity	TRUE	ORF is shorter
uc001dij.2,uc010orn.1	uc010orn.1	uc001dij.2	chr1:78444934..78482993,+	DNAJB4	LUAD_ctrl	LUAD_cancer	domains_identified	TRUE	Domain loss
uc001dij.2,uc010orn.1	uc010orn.1	uc001dij.2	chr1:78444934..78482993,+	DNAJB4	STAD_ctrl	STAD_cancer	ORF_seq_similarity	TRUE	ORF is shorter
uc001dij.2,uc010orn.1	uc010orn.1	uc001dij.2	chr1:78444934..78482993,+	DNAJB4	STAD_ctrl	STAD_cancer	domains_identified	TRUE	Domain loss
uc001djl.2,uc010oru.1	uc010oru.1	uc001djl.2	chr1:84543636..84704179,+	PRKACB	COAD_ctrl	COAD_cancer	ORF_seq_similarity	TRUE	ORF is shorter
uc001djl.2,uc010oru.1	uc010oru.1	uc001djl.2	chr1:84543636..84704179,+	PRKACB	KIRC_ctrl	KIRC_cancer	ORF_seq_similarity	TRUE	ORF is shorter
uc001djl.2,uc010oru.1	uc010oru.1	uc001djl.2	chr1:84543636..84704179,+	PRKACB	LUSC_ctrl	LUSC_cancer	ORF_seq_similarity	TRUE	ORF is shorter
uc001dkp.2,uc001dkq.2	uc001dkq.2	uc001dkp.2	chr1:85483766..85514169,-	MCOLN3	KICH_ctrl	KICH_cancer	ORF_seq_similarity	TRUE	ORF is shorter
uc009wcs.2,uc009wcu.2	uc009wcu.2	uc009wcs.2	chr1:87012759..87046430,+	CLCA4	COAD_ctrl	COAD_cancer	ORF_seq_similarity	TRUE	ORF is shorter
uc009wcs.2,uc009wcu.2	uc009wcu.2	uc009wcs.2	chr1:87012759..87046430,+	CLCA4	COAD_ctrl	COAD_cancer	signal_peptide_identified	TRUE	Signal peptide loss
uc001dmc.3,uc010osk.1	uc010osk.1	uc001dmc.3	chr1:87380335..87575680,+	HS2ST1	KIRC_ctrl	KIRC_cancer	ORF_seq_similarity	TRUE	ORF is longer
uc001dmn.2,uc010osr.1	uc010osr.1	uc001dmn.2	chr1:89149922..89301937,+	PKN2	KIRC_ctrl	KIRC_cancer	ORF_seq_similarity	TRUE	ORF is shorter
uc001dmn.2,uc010osr.1	uc010osr.1	uc001dmn.2	chr1:89149922..89301937,+	PKN2	KIRC_ctrl	KIRC_cancer	domains_identified	TRUE	Domain loss
uc001dmn.2,uc010osr.1	uc010osr.1	uc001dmn.2	chr1:89149922..89301937,+	PKN2	THCA_ctrl	THCA_cancer	ORF_seq_similarity	TRUE	ORF is shorter
uc001dmn.2,uc010osr.1	uc010osr.1	uc001dmn.2	chr1:89149922..89301937,+	PKN2	THCA_ctrl	THCA_cancer	domains_identified	TRUE	Domain loss
uc001apo.2,uc010nzz.1	uc010nzz.1	uc001apo.2	chr1:9097007..9148510,-	SLC2A5	COAD_ctrl	COAD_cancer	ORF_seq_similarity	TRUE	ORF is shorter
uc001ach.2,uc001acg.2	uc001acg.2	uc001ach.2	chr1:910579..917473,-	C1orf170	HNSC_ctrl	HNSC_cancer	coding_potential	TRUE	Transcript is Noncoding
uc001ach.2,uc001acg.2	uc001acg.2	uc001ach.2	chr1:910579..917473,-	C1orf170	HNSC_ctrl	HNSC_cancer	ORF_seq_similarity	TRUE	Complete ORF loss
uc001dnw.2,uc001dnx.2	uc001dnx.2	uc001dnw.2	chr1:91380860..91487671,-	ZNF644	THCA_ctrl	THCA_cancer	coding_potential	TRUE	Transcript is Noncoding
uc001dnw.2,uc001dnx.2	uc001dnx.2	uc001dnw.2	chr1:91380860..91487671,-	ZNF644	THCA_ctrl	THCA_cancer	ORF_seq_similarity	TRUE	ORF is shorter
uc001dnw.2,uc001dnx.2	uc001dnx.2	uc001dnw.2	chr1:91380860..91487671,-	ZNF644	THCA_ctrl	THCA_cancer	domains_identified	TRUE	Domain loss
uc001aci.2,uc010nyc.1	uc010nyc.1	uc001aci.2	chr1:934342..935552,-	HES4	KICH_ctrl	KICH_cancer	intron_retention	TRUE	Intron retention gain
uc001aci.2,uc010nyc.1	uc010nyc.1	uc001aci.2	chr1:934342..935552,-	HES4	KICH_ctrl	KICH_cancer	ORF_seq_similarity	TRUE	ORF is longer
uc010nyc.1,uc001aci.2	uc001aci.2	uc010nyc.1	chr1:934342..935552,-	HES4	KIRC_ctrl	KIRC_cancer	intron_retention	TRUE	Intron retention loss
uc010nyc.1,uc001aci.2	uc001aci.2	uc010nyc.1	chr1:934342..935552,-	HES4	KIRC_ctrl	KIRC_cancer	ORF_seq_similarity	TRUE	ORF is shorter
uc010nyc.1,uc001aci.2	uc001aci.2	uc010nyc.1	chr1:934342..935552,-	HES4	THCA_ctrl	THCA_cancer	intron_retention	TRUE	Intron retention loss
uc010nyc.1,uc001aci.2	uc001aci.2	uc010nyc.1	chr1:934342..935552,-	HES4	THCA_ctrl	THCA_cancer	ORF_seq_similarity	TRUE	ORF is shorter
uc009wdj.2,uc001dpm.3	uc001dpm.3	uc009wdj.2	chr1:93544792..93604636,+	MTF2	THCA_ctrl	THCA_cancer	ORF_seq_similarity	TRUE	ORF is shorter
uc009wdj.2,uc001dpm.3	uc001dpm.3	uc009wdj.2	chr1:93544792..93604636,+	MTF2	THCA_ctrl	THCA_cancer	domains_identified	TRUE	Domain loss
uc001dpv.2,uc010otl.1	uc010otl.1	uc001dpv.2	chr1:93913839..94020216,+	FNBP1L	BRCA_ctrl	BRCA_cancer	ORF_seq_similarity	TRUE	ORF is shorter
uc001dpv.2,uc010otl.1	uc010otl.1	uc001dpv.2	chr1:93913839..94020216,+	FNBP1L	BRCA_ctrl	BRCA_cancer	domains_identified	TRUE	Domain loss
uc001dpw.2,uc010otl.1	uc010otl.1	uc001dpw.2	chr1:93913839..94020216,+	FNBP1L	KIRC_ctrl	KIRC_cancer	intron_retention	TRUE	Intron retention loss
uc001dpw.2,uc010otl.1	uc010otl.1	uc001dpw.2	chr1:93913839..94020216,+	FNBP1L	KIRC_ctrl	KIRC_cancer	ORF_seq_similarity	TRUE	ORF is shorter
uc001dpw.2,uc010otl.1	uc010otl.1	uc001dpw.2	chr1:93913839..94020216,+	FNBP1L	KIRC_ctrl	KIRC_cancer	domains_identified	TRUE	Domain loss
uc001dpy.2,uc001dpx.3	uc001dpx.3	uc001dpy.2	chr1:94027351..94312706,-	BCAR3	BRCA_ctrl	BRCA_cancer	ORF_seq_similarity	TRUE	ORF is shorter
uc001dpy.2,uc001dpx.3	uc001dpx.3	uc001dpy.2	chr1:94027351..94312706,-	BCAR3	BRCA_ctrl	BRCA_cancer	domains_identified	TRUE	Domain loss
uc001dpy.2,uc001dqa.2	uc001dqa.2	uc001dpy.2	chr1:94027351..94312706,-	BCAR3	HNSC_ctrl	HNSC_cancer	ORF_seq_similarity	TRUE	ORF is longer
uc001dqa.2,uc001dpy.2	uc001dpy.2	uc001dqa.2	chr1:94027351..94312706,-	BCAR3	KICH_ctrl	KICH_cancer	ORF_seq_similarity	TRUE	ORF is shorter
uc001dpx.3,uc001dpy.2	uc001dpy.2	uc001dpx.3	chr1:94027351..94312706,-	BCAR3	KIRC_ctrl	KIRC_cancer	ORF_seq_similarity	TRUE	ORF is longer
uc001dpx.3,uc001dpy.2	uc001dpy.2	uc001dpx.3	chr1:94027351..94312706,-	BCAR3	KIRC_ctrl	KIRC_cancer	domains_identified	TRUE	Domain gain
uc001dqa.2,uc001dpx.3	uc001dpx.3	uc001dqa.2	chr1:94027351..94312706,-	BCAR3	PRAD_ctrl	PRAD_cancer	ORF_seq_similarity	TRUE	ORF is shorter
uc001dqa.2,uc001dpx.3	uc001dpx.3	uc001dqa.2	chr1:94027351..94312706,-	BCAR3	PRAD_ctrl	PRAD_cancer	domains_identified	TRUE	Domain loss
uc001apy.2,uc001apz.2	uc001apz.2	uc001apy.2	chr1:9648977..9674935,+	TMEM201	BRCA_ctrl	BRCA_cancer	ORF_seq_similarity	TRUE	ORF is longer
uc001apy.2,uc001apz.2	uc001apz.2	uc001apy.2	chr1:9648977..9674935,+	TMEM201	HNSC_ctrl	HNSC_cancer	ORF_seq_similarity	TRUE	ORF is longer
uc001apy.2,uc001apz.2	uc001apz.2	uc001apy.2	chr1:9648977..9674935,+	TMEM201	KIRC_ctrl	KIRC_cancer	ORF_seq_similarity	TRUE	ORF is longer
uc001apy.2,uc001apz.2	uc001apz.2	uc001apy.2	chr1:9648977..9674935,+	TMEM201	KIRP_ctrl	KIRP_cancer	ORF_seq_similarity	TRUE	ORF is longer
uc001apy.2,uc001apz.2	uc001apz.2	uc001apy.2	chr1:9648977..9674935,+	TMEM201	LUAD_ctrl	LUAD_cancer	ORF_seq_similarity	TRUE	ORF is longer
uc001apy.2,uc001apz.2	uc001apz.2	uc001apy.2	chr1:9648977..9674935,+	TMEM201	LUSC_ctrl	LUSC_cancer	ORF_seq_similarity	TRUE	ORF is longer
uc001drq.2,uc001drt.2	uc001drt.2	uc001drq.2	chr1:97187175..97280599,+	PTBP2	COAD_ctrl	COAD_cancer	ORF_seq_similarity	TRUE	ORF is shorter
uc001drq.2,uc001drt.2	uc001drt.2	uc001drq.2	chr1:97187175..97280599,+	PTBP2	COAD_ctrl	COAD_cancer	domains_identified	TRUE	Domain loss
uc010oua.1,uc001drt.2	uc001drt.2	uc010oua.1	chr1:97187175..97280599,+	PTBP2	KIRC_ctrl	KIRC_cancer	ORF_seq_similarity	TRUE	ORF is shorter
uc010oua.1,uc001drt.2	uc001drt.2	uc010oua.1	chr1:97187175..97280599,+	PTBP2	KIRC_ctrl	KIRC_cancer	domains_identified	TRUE	Domain loss
uc010oua.1,uc001drt.2	uc001drt.2	uc010oua.1	chr1:97187175..97280599,+	PTBP2	KIRP_ctrl	KIRP_cancer	ORF_seq_similarity	TRUE	ORF is shorter
uc010oua.1,uc001drt.2	uc001drt.2	uc010oua.1	chr1:97187175..97280599,+	PTBP2	KIRP_ctrl	KIRP_cancer	domains_identified	TRUE	Domain loss
uc001drq.2,uc001drt.2	uc001drt.2	uc001drq.2	chr1:97187175..97280599,+	PTBP2	STAD_ctrl	STAD_cancer	ORF_seq_similarity	TRUE	ORF is shorter
uc001drq.2,uc001drt.2	uc001drt.2	uc001drq.2	chr1:97187175..97280599,+	PTBP2	STAD_ctrl	STAD_cancer	domains_identified	TRUE	Domain loss
uc010oag.1,uc001aqf.2	uc001aqf.2	uc010oag.1	chr1:9789080..9884550,-	CLSTN1	KIRC_ctrl	KIRC_cancer	ORF_seq_similarity	TRUE	ORF is shorter
uc010oag.1,uc001aqf.2	uc001aqf.2	uc010oag.1	chr1:9789080..9884550,-	CLSTN1	KIRC_ctrl	KIRC_cancer	domains_identified	TRUE	Domain loss
uc010oag.1,uc001aqf.2	uc001aqf.2	uc010oag.1	chr1:9789080..9884550,-	CLSTN1	KIRC_ctrl	KIRC_cancer	signal_peptide_identified	TRUE	Signal peptide loss
uc001kpn.1,uc009xwd.1	uc009xwd.1	uc001kpn.1	chr10:100218877..100995619,-	HPSE2	PRAD_ctrl	PRAD_cancer	ORF_seq_similarity	TRUE	ORF is shorter
uc001kqd.3,uc001kqe.3	uc001kqe.3	uc001kqd.3	chr10:101491958..101515893,+	CUTC	BRCA_ctrl	BRCA_cancer	ORF_seq_similarity	TRUE	Complete ORF loss
uc001kqd.3,uc001kqe.3	uc001kqe.3	uc001kqd.3	chr10:101491958..101515893,+	CUTC	BRCA_ctrl	BRCA_cancer	domains_identified	TRUE	Domain loss
uc001kqd.3,uc001kqe.3	uc001kqe.3	uc001kqd.3	chr10:101491958..101515893,+	CUTC	COAD_ctrl	COAD_cancer	ORF_seq_similarity	TRUE	Complete ORF loss
uc001kqd.3,uc001kqe.3	uc001kqe.3	uc001kqd.3	chr10:101491958..101515893,+	CUTC	COAD_ctrl	COAD_cancer	domains_identified	TRUE	Domain loss
uc001kqd.3,uc001kqe.3	uc001kqe.3	uc001kqd.3	chr10:101491958..101515893,+	CUTC	HNSC_ctrl	HNSC_cancer	ORF_seq_similarity	TRUE	Complete ORF loss
uc001kqd.3,uc001kqe.3	uc001kqe.3	uc001kqd.3	chr10:101491958..101515893,+	CUTC	HNSC_ctrl	HNSC_cancer	domains_identified	TRUE	Domain loss
uc001kqd.3,uc001kqe.3	uc001kqe.3	uc001kqd.3	chr10:101491958..101515893,+	CUTC	KICH_ctrl	KICH_cancer	ORF_seq_similarity	TRUE	Complete ORF loss
uc001kqd.3,uc001kqe.3	uc001kqe.3	uc001kqd.3	chr10:101491958..101515893,+	CUTC	KICH_ctrl	KICH_cancer	domains_identified	TRUE	Domain loss
uc001kqd.3,uc001kqe.3	uc001kqe.3	uc001kqd.3	chr10:101491958..101515893,+	CUTC	LUSC_ctrl	LUSC_cancer	ORF_seq_similarity	TRUE	Complete ORF loss
uc001kqd.3,uc001kqe.3	uc001kqe.3	uc001kqd.3	chr10:101491958..101515893,+	CUTC	LUSC_ctrl	LUSC_cancer	domains_identified	TRUE	Domain loss
uc001kqh.2,uc010qpl.1	uc010qpl.1	uc001kqh.2	chr10:101635334..101769676,-	DNMBP	KICH_ctrl	KICH_cancer	ORF_seq_similarity	TRUE	ORF is shorter
uc001kqh.2,uc010qpl.1	uc010qpl.1	uc001kqh.2	chr10:101635334..101769676,-	DNMBP	KICH_ctrl	KICH_cancer	domains_identified	TRUE	Domain loss
uc001kqh.2,uc001kqj.2	uc001kqj.2	uc001kqh.2	chr10:101635334..101769676,-	DNMBP	KIRC_ctrl	KIRC_cancer	ORF_seq_similarity	TRUE	ORF is longer
uc001kqh.2,uc001kqj.2	uc001kqj.2	uc001kqh.2	chr10:101635334..101769676,-	DNMBP	KIRC_ctrl	KIRC_cancer	domains_identified	TRUE	Domain gain
uc001kqh.2,uc010qpl.1	uc010qpl.1	uc001kqh.2	chr10:101635334..101769676,-	DNMBP	KIRC_ctrl	KIRC_cancer	ORF_seq_similarity	TRUE	ORF is shorter
uc001kqh.2,uc010qpl.1	uc010qpl.1	uc001kqh.2	chr10:101635334..101769676,-	DNMBP	KIRC_ctrl	KIRC_cancer	domains_identified	TRUE	Domain loss
uc001kqh.2,uc010qpl.1	uc010qpl.1	uc001kqh.2	chr10:101635334..101769676,-	DNMBP	KIRP_ctrl	KIRP_cancer	ORF_seq_similarity	TRUE	ORF is shorter
uc001kqh.2,uc010qpl.1	uc010qpl.1	uc001kqh.2	chr10:101635334..101769676,-	DNMBP	KIRP_ctrl	KIRP_cancer	domains_identified	TRUE	Domain loss
uc001kqj.2,uc010qpl.1	uc010qpl.1	uc001kqj.2	chr10:101635334..101769676,-	DNMBP	PRAD_ctrl	PRAD_cancer	ORF_seq_similarity	TRUE	ORF is shorter
uc001kqj.2,uc010qpl.1	uc010qpl.1	uc001kqj.2	chr10:101635334..101769676,-	DNMBP	PRAD_ctrl	PRAD_cancer	domains_identified	TRUE	Domain loss
uc001kqj.2,uc001kqh.2	uc001kqh.2	uc001kqj.2	chr10:101635334..101769676,-	DNMBP	STAD_ctrl	STAD_cancer	ORF_seq_similarity	TRUE	ORF is shorter
uc001kqj.2,uc001kqh.2	uc001kqh.2	uc001kqj.2	chr10:101635334..101769676,-	DNMBP	STAD_ctrl	STAD_cancer	domains_identified	TRUE	Domain loss
uc001kqh.2,uc010qpl.1	uc010qpl.1	uc001kqh.2	chr10:101635334..101769676,-	DNMBP	THCA_ctrl	THCA_cancer	ORF_seq_similarity	TRUE	ORF is shorter
uc001kqh.2,uc010qpl.1	uc010qpl.1	uc001kqh.2	chr10:101635334..101769676,-	DNMBP	THCA_ctrl	THCA_cancer	domains_identified	TRUE	Domain loss
uc001kqo.3,uc001kqm.3	uc001kqm.3	uc001kqo.3	chr10:101909848..101945814,-	ERLIN1	THCA_ctrl	THCA_cancer	ORF_seq_similarity	TRUE	ORF is shorter
uc001kqo.3,uc001kqm.3	uc001kqm.3	uc001kqo.3	chr10:101909848..101945814,-	ERLIN1	THCA_ctrl	THCA_cancer	domains_identified	TRUE	Domain loss
uc001kqq.1,uc010qpn.1	uc010qpn.1	uc001kqq.1	chr10:101992055..102027437,-	CWF19L1	KIRP_ctrl	KIRP_cancer	ORF_seq_similarity	TRUE	ORF is shorter
uc001ktx.2,uc010qqg.1	uc010qqg.1	uc001ktx.2	chr10:103585732..103603677,-	KCNIP2	BRCA_ctrl	BRCA_cancer	coding_potential	TRUE	Transcript is coding
uc001ktx.2,uc010qqg.1	uc010qqg.1	uc001ktx.2	chr10:103585732..103603677,-	KCNIP2	BRCA_ctrl	BRCA_cancer	ORF_seq_similarity	TRUE	Complete ORF gain
uc001ktx.2,uc010qqg.1	uc010qqg.1	uc001ktx.2	chr10:103585732..103603677,-	KCNIP2	BRCA_ctrl	BRCA_cancer	domains_identified	TRUE	Domain gain
uc009xwy.1,uc009xwx.1	uc009xwx.1	uc009xwy.1	chr10:103605356..103815932,-	C10orf76	KICH_ctrl	KICH_cancer	ORF_seq_similarity	TRUE	Complete ORF loss
uc009xwy.1,uc009xwx.1	uc009xwx.1	uc009xwy.1	chr10:103605356..103815932,-	C10orf76	KICH_ctrl	KICH_cancer	domains_identified	TRUE	Domain loss
uc009xwy.1,uc009xwx.1	uc009xwx.1	uc009xwy.1	chr10:103605356..103815932,-	C10orf76	KIRP_ctrl	KIRP_cancer	ORF_seq_similarity	TRUE	Complete ORF loss
uc009xwy.1,uc009xwx.1	uc009xwx.1	uc009xwy.1	chr10:103605356..103815932,-	C10orf76	KIRP_ctrl	KIRP_cancer	domains_identified	TRUE	Domain loss
uc009xwy.1,uc009xwx.1	uc009xwx.1	uc009xwy.1	chr10:103605356..103815932,-	C10orf76	THCA_ctrl	THCA_cancer	ORF_seq_similarity	TRUE	Complete ORF loss
uc009xwy.1,uc009xwx.1	uc009xwx.1	uc009xwy.1	chr10:103605356..103815932,-	C10orf76	THCA_ctrl	THCA_cancer	domains_identified	TRUE	Domain loss
uc001kvf.1,uc001kve.1	uc001kve.1	uc001kvf.1	chr10:104162376..104179691,-	PSD	COAD_ctrl	COAD_cancer	ORF_seq_similarity	TRUE	ORF is shorter
uc001iga.2,uc001igb.2	uc001igb.2	uc001iga.2	chr10:1085966..1102644,-	IDI1	KIRP_ctrl	KIRP_cancer	coding_potential	TRUE	Transcript is Noncoding
uc001iga.2,uc001igb.2	uc001igb.2	uc001iga.2	chr10:1085966..1102644,-	IDI1	KIRP_ctrl	KIRP_cancer	ORF_seq_similarity	TRUE	Complete ORF loss
uc001iga.2,uc001igb.2	uc001igb.2	uc001iga.2	chr10:1085966..1102644,-	IDI1	KIRP_ctrl	KIRP_cancer	domains_identified	TRUE	Domain loss
uc001ikl.3,uc001iki.3	uc001iki.3	uc001ikl.3	chr10:11047259..11378670,+	CELF2	BRCA_ctrl	BRCA_cancer	intron_retention	TRUE	Intron retention gain
uc001kyy.2,uc001kza.2	uc001kza.2	uc001kyy.2	chr10:111967363..112047121,+	MXI1	COAD_ctrl	COAD_cancer	ORF_seq_similarity	TRUE	ORF is shorter
uc001kza.2,uc001kyy.2	uc001kyy.2	uc001kza.2	chr10:111967363..112047121,+	MXI1	KIRC_ctrl	KIRC_cancer	ORF_seq_similarity	TRUE	ORF is longer
uc001kza.2,uc001kyy.2	uc001kyy.2	uc001kza.2	chr10:111967363..112047121,+	MXI1	LUAD_ctrl	LUAD_cancer	ORF_seq_similarity	TRUE	ORF is longer
uc001kza.2,uc001kyy.2	uc001kyy.2	uc001kza.2	chr10:111967363..112047121,+	MXI1	LUSC_ctrl	LUSC_cancer	ORF_seq_similarity	TRUE	ORF is longer
uc001kzl.3,uc010qrg.1	uc010qrg.1	uc001kzl.3	chr10:112679301..112773424,+	SHOC2	COAD_ctrl	COAD_cancer	ORF_seq_similarity	TRUE	ORF is shorter
uc001kzl.3,uc010qrg.1	uc010qrg.1	uc001kzl.3	chr10:112679301..112773424,+	SHOC2	COAD_ctrl	COAD_cancer	domains_identified	TRUE	Domain loss
uc001kzl.3,uc010qrg.1	uc010qrg.1	uc001kzl.3	chr10:112679301..112773424,+	SHOC2	KIRC_ctrl	KIRC_cancer	ORF_seq_similarity	TRUE	ORF is shorter
uc001kzl.3,uc010qrg.1	uc010qrg.1	uc001kzl.3	chr10:112679301..112773424,+	SHOC2	KIRC_ctrl	KIRC_cancer	domains_identified	TRUE	Domain loss
uc001kzl.3,uc010qrg.1	uc010qrg.1	uc001kzl.3	chr10:112679301..112773424,+	SHOC2	KIRP_ctrl	KIRP_cancer	ORF_seq_similarity	TRUE	ORF is shorter
uc001kzl.3,uc010qrg.1	uc010qrg.1	uc001kzl.3	chr10:112679301..112773424,+	SHOC2	KIRP_ctrl	KIRP_cancer	domains_identified	TRUE	Domain loss
uc001kzl.3,uc010qrg.1	uc010qrg.1	uc001kzl.3	chr10:112679301..112773424,+	SHOC2	THCA_ctrl	THCA_cancer	ORF_seq_similarity	TRUE	ORF is shorter
uc001kzl.3,uc010qrg.1	uc010qrg.1	uc001kzl.3	chr10:112679301..112773424,+	SHOC2	THCA_ctrl	THCA_cancer	domains_identified	TRUE	Domain loss
uc001kzs.2,uc010qrj.1	uc010qrj.1	uc001kzs.2	chr10:114133916..114188137,+	ACSL5	LIHC_ctrl	LIHC_cancer	ORF_seq_similarity	TRUE	ORF is shorter
uc001kzs.2,uc010qrj.1	uc010qrj.1	uc001kzs.2	chr10:114133916..114188137,+	ACSL5	LUSC_ctrl	LUSC_cancer	ORF_seq_similarity	TRUE	ORF is shorter
uc001kzu.2,uc010qrj.1	uc010qrj.1	uc001kzu.2	chr10:114133916..114188137,+	ACSL5	THCA_ctrl	THCA_cancer	ORF_seq_similarity	TRUE	ORF is shorter
uc001lae.3,uc010qrv.1	uc010qrv.1	uc001lae.3	chr10:114710009..114927434,+	TCF7L2	COAD_ctrl	COAD_cancer	ORF_seq_similarity	TRUE	ORF is shorter
uc009xyw.2,uc001lda.1	uc001lda.1	uc009xyw.2	chr10:118644308..118886097,-	KIAA1598	KICH_ctrl	KICH_cancer	coding_potential	TRUE	Transcript is Noncoding
uc009xyw.2,uc001lda.1	uc001lda.1	uc009xyw.2	chr10:118644308..118886097,-	KIAA1598	KICH_ctrl	KICH_cancer	ORF_seq_similarity	TRUE	Complete ORF loss
uc001ldw.2,uc010qsx.1	uc010qsx.1	uc001ldw.2	chr10:120863611..120897215,+	FAM45A	COAD_ctrl	COAD_cancer	ORF_seq_similarity	TRUE	Complete ORF loss
uc001ldw.2,uc010qsx.1	uc010qsx.1	uc001ldw.2	chr10:120863611..120897215,+	FAM45A	COAD_ctrl	COAD_cancer	domains_identified	TRUE	Domain loss
uc010qsw.1,uc010qsx.1	uc010qsx.1	uc010qsw.1	chr10:120863611..120897215,+	FAM45A	COAD_ctrl	COAD_cancer	ORF_seq_similarity	TRUE	Complete ORF loss
uc010qsw.1,uc010qsx.1	uc010qsx.1	uc010qsw.1	chr10:120863611..120897215,+	FAM45A	COAD_ctrl	COAD_cancer	domains_identified	TRUE	Domain loss
uc001ldw.2,uc010qsz.1	uc010qsz.1	uc001ldw.2	chr10:120863611..120897215,+	FAM45A	COAD_ctrl	COAD_cancer	ORF_seq_similarity	TRUE	ORF is shorter
uc001ldw.2,uc010qsz.1	uc010qsz.1	uc001ldw.2	chr10:120863611..120897215,+	FAM45A	KIRC_ctrl	KIRC_cancer	ORF_seq_similarity	TRUE	ORF is shorter
uc001ler.2,uc001leq.1	uc001leq.1	uc001ler.2	chr10:121588972..121633133,-	C10orf119	KICH_ctrl	KICH_cancer	ORF_seq_similarity	TRUE	ORF is shorter
uc001ler.2,uc001leq.1	uc001leq.1	uc001ler.2	chr10:121588972..121633133,-	C10orf119	KICH_ctrl	KICH_cancer	domains_identified	TRUE	Domain loss
uc001leu.1,uc009xzk.1	uc009xzk.1	uc001leu.1	chr10:121652223..121701245,+	SEC23IP	THCA_ctrl	THCA_cancer	ORF_seq_similarity	TRUE	Complete ORF loss
uc001leu.1,uc009xzk.1	uc009xzk.1	uc001leu.1	chr10:121652223..121701245,+	SEC23IP	THCA_ctrl	THCA_cancer	domains_identified	TRUE	Domain loss
uc001lev.1,uc001ley.1	uc001ley.1	uc001lev.1	chr10:122216466..122349367,+	PPAPDC1A	KICH_ctrl	KICH_cancer	ORF_seq_similarity	TRUE	ORF is shorter
uc010qtf.1,uc009xzn.2	uc009xzn.2	uc010qtf.1	chr10:122610695..122669035,+	WDR11	KICH_ctrl	KICH_cancer	ORF_seq_similarity	TRUE	ORF is shorter
uc010qtf.1,uc009xzn.2	uc009xzn.2	uc010qtf.1	chr10:122610695..122669035,+	WDR11	KICH_ctrl	KICH_cancer	domains_identified	TRUE	Domain loss
uc010qtf.1,uc009xzn.2	uc009xzn.2	uc010qtf.1	chr10:122610695..122669035,+	WDR11	STAD_ctrl	STAD_cancer	ORF_seq_similarity	TRUE	ORF is shorter
uc010qtf.1,uc009xzn.2	uc009xzn.2	uc010qtf.1	chr10:122610695..122669035,+	WDR11	STAD_ctrl	STAD_cancer	domains_identified	TRUE	Domain loss
uc010qtj.1,uc001lfg.3	uc001lfg.3	uc010qtj.1	chr10:123237845..123357972,-	FGFR2	KIRC_ctrl	KIRC_cancer	intron_retention	TRUE	Intron retention gain
uc010qtj.1,uc001lfg.3	uc001lfg.3	uc010qtj.1	chr10:123237845..123357972,-	FGFR2	KIRC_ctrl	KIRC_cancer	ORF_seq_similarity	TRUE	ORF is shorter
uc010qtj.1,uc001lfg.3	uc001lfg.3	uc010qtj.1	chr10:123237845..123357972,-	FGFR2	KIRC_ctrl	KIRC_cancer	domains_identified	TRUE	Domain loss
uc010qtj.1,uc001lfg.3	uc001lfg.3	uc010qtj.1	chr10:123237845..123357972,-	FGFR2	KIRC_ctrl	KIRC_cancer	signal_peptide_identified	TRUE	Signal peptide loss
uc010qtj.1,uc001lfg.3	uc001lfg.3	uc010qtj.1	chr10:123237845..123357972,-	FGFR2	KIRP_ctrl	KIRP_cancer	intron_retention	TRUE	Intron retention gain
uc010qtj.1,uc001lfg.3	uc001lfg.3	uc010qtj.1	chr10:123237845..123357972,-	FGFR2	KIRP_ctrl	KIRP_cancer	ORF_seq_similarity	TRUE	ORF is shorter
uc010qtj.1,uc001lfg.3	uc001lfg.3	uc010qtj.1	chr10:123237845..123357972,-	FGFR2	KIRP_ctrl	KIRP_cancer	domains_identified	TRUE	Domain loss
uc010qtj.1,uc001lfg.3	uc001lfg.3	uc010qtj.1	chr10:123237845..123357972,-	FGFR2	KIRP_ctrl	KIRP_cancer	signal_peptide_identified	TRUE	Signal peptide loss
uc001lgf.1,uc001lgg.1	uc001lgg.1	uc001lgf.1	chr10:124134220..124191866,+	PLEKHA1	LUSC_ctrl	LUSC_cancer	ORF_seq_similarity	TRUE	ORF is longer
uc001lix.3,uc010quh.1	uc010quh.1	uc001lix.3	chr10:127477148..127511837,-	UROS	KIRP_ctrl	KIRP_cancer	coding_potential	TRUE	Transcript is Noncoding
uc001lix.3,uc010quh.1	uc010quh.1	uc001lix.3	chr10:127477148..127511837,-	UROS	KIRP_ctrl	KIRP_cancer	ORF_seq_similarity	TRUE	Complete ORF loss
uc001lix.3,uc010quh.1	uc010quh.1	uc001lix.3	chr10:127477148..127511837,-	UROS	KIRP_ctrl	KIRP_cancer	domains_identified	TRUE	Domain loss
uc001ljg.1,uc001lje.1	uc001lje.1	uc001ljg.1	chr10:127524909..127585027,-	DHX32	KICH_ctrl	KICH_cancer	ORF_seq_similarity	TRUE	ORF is shorter
uc001ljg.1,uc001lje.1	uc001lje.1	uc001ljg.1	chr10:127524909..127585027,-	DHX32	THCA_ctrl	THCA_cancer	ORF_seq_similarity	TRUE	ORF is shorter
uc001lkd.2,uc009yau.2	uc009yau.2	uc001lkd.2	chr10:129705325..129884162,+	PTPRE	HNSC_ctrl	HNSC_cancer	intron_retention	TRUE	Intron retention loss
uc001lkd.2,uc009yau.2	uc009yau.2	uc001lkd.2	chr10:129705325..129884162,+	PTPRE	HNSC_ctrl	HNSC_cancer	signal_peptide_identified	TRUE	Signal peptide gain
uc001lkd.2,uc001lkb.2	uc001lkb.2	uc001lkd.2	chr10:129705325..129884162,+	PTPRE	THCA_ctrl	THCA_cancer	signal_peptide_identified	TRUE	Signal peptide gain
uc010qbs.1,uc001imk.2	uc001imk.2	uc010qbs.1	chr10:13360083..13390280,-	SEPHS1	HNSC_ctrl	HNSC_cancer	ORF_seq_similarity	TRUE	ORF is longer
uc010qbs.1,uc001imk.2	uc001imk.2	uc010qbs.1	chr10:13360083..13390280,-	SEPHS1	HNSC_ctrl	HNSC_cancer	signal_peptide_identified	TRUE	Signal peptide loss
uc001imj.2,uc001imk.2	uc001imk.2	uc001imj.2	chr10:13360083..13390280,-	SEPHS1	STAD_ctrl	STAD_cancer	ORF_seq_similarity	TRUE	ORF is longer
uc001imj.2,uc001imk.2	uc001imk.2	uc001imj.2	chr10:13360083..13390280,-	SEPHS1	STAD_ctrl	STAD_cancer	NMD_status	TRUE	NMD insensitive
uc001lmg.1,uc010qvd.1	uc010qvd.1	uc001lmg.1	chr10:135093138..135125841,-	TUBGCP2	KIRC_ctrl	KIRC_cancer	ORF_seq_similarity	TRUE	ORF is shorter
uc001lmg.1,uc010qvd.1	uc010qvd.1	uc001lmg.1	chr10:135093138..135125841,-	TUBGCP2	KIRP_ctrl	KIRP_cancer	ORF_seq_similarity	TRUE	ORF is shorter
uc001lmg.1,uc010qvd.1	uc010qvd.1	uc001lmg.1	chr10:135093138..135125841,-	TUBGCP2	THCA_ctrl	THCA_cancer	ORF_seq_similarity	TRUE	ORF is shorter
uc001lmq.1,uc001lmp.2	uc001lmp.2	uc001lmq.1	chr10:135160844..135166187,+	PRAP1	STAD_ctrl	STAD_cancer	ORF_seq_similarity	TRUE	ORF is longer
uc001lmq.1,uc001lmp.2	uc001lmp.2	uc001lmq.1	chr10:135160844..135166187,+	PRAP1	STAD_ctrl	STAD_cancer	signal_peptide_identified	TRUE	Signal peptide gain
uc001iqg.1,uc009xkc.1	uc009xkc.1	uc001iqg.1	chr10:20105372..20569115,+	PLXDC2	COAD_ctrl	COAD_cancer	ORF_seq_similarity	TRUE	Complete ORF loss
uc001iqg.1,uc009xkc.1	uc009xkc.1	uc001iqg.1	chr10:20105372..20569115,+	PLXDC2	COAD_ctrl	COAD_cancer	domains_identified	TRUE	Domain loss
uc001iqg.1,uc009xkc.1	uc009xkc.1	uc001iqg.1	chr10:20105372..20569115,+	PLXDC2	KICH_ctrl	KICH_cancer	ORF_seq_similarity	TRUE	Complete ORF loss
uc001iqg.1,uc009xkc.1	uc009xkc.1	uc001iqg.1	chr10:20105372..20569115,+	PLXDC2	KICH_ctrl	KICH_cancer	domains_identified	TRUE	Domain loss
uc001irh.2,uc009xkg.2	uc009xkg.2	uc001irh.2	chr10:22605299..22620417,+	BMI1	COAD_ctrl	COAD_cancer	ORF_seq_similarity	TRUE	ORF is longer
uc001irh.2,uc009xkg.2	uc009xkg.2	uc001irh.2	chr10:22605299..22620417,+	BMI1	COAD_ctrl	COAD_cancer	domains_identified	TRUE	Domain gain
uc001irh.2,uc009xkg.2	uc009xkg.2	uc001irh.2	chr10:22605299..22620417,+	BMI1	STAD_ctrl	STAD_cancer	ORF_seq_similarity	TRUE	ORF is longer
uc001irh.2,uc009xkg.2	uc009xkg.2	uc001irh.2	chr10:22605299..22620417,+	BMI1	STAD_ctrl	STAD_cancer	domains_identified	TRUE	Domain gain
uc001irh.2,uc009xkg.2	uc009xkg.2	uc001irh.2	chr10:22605299..22620417,+	BMI1	THCA_ctrl	THCA_cancer	ORF_seq_similarity	TRUE	ORF is longer
uc001irh.2,uc009xkg.2	uc009xkg.2	uc001irh.2	chr10:22605299..22620417,+	BMI1	THCA_ctrl	THCA_cancer	domains_identified	TRUE	Domain gain
uc001irl.3,uc010qcu.1	uc010qcu.1	uc001irl.3	chr10:22823767..23003503,-	PIP4K2A	KICH_ctrl	KICH_cancer	ORF_seq_similarity	TRUE	ORF is shorter
uc001irl.3,uc010qcu.1	uc010qcu.1	uc001irl.3	chr10:22823767..23003503,-	PIP4K2A	THCA_ctrl	THCA_cancer	ORF_seq_similarity	TRUE	ORF is shorter
uc001iru.3,uc001irx.2	uc001irx.2	uc001iru.3	chr10:23983675..24836771,+	KIAA1217	LUAD_ctrl	LUAD_cancer	intron_retention	TRUE	Intron retention gain
uc001iru.3,uc001irx.2	uc001irx.2	uc001iru.3	chr10:23983675..24836771,+	KIAA1217	LUAD_ctrl	LUAD_cancer	ORF_seq_similarity	TRUE	ORF is shorter
uc010qcz.1,uc001irx.2	uc001irx.2	uc010qcz.1	chr10:23983675..24836771,+	KIAA1217	LUAD_ctrl	LUAD_cancer	intron_retention	TRUE	Intron retention gain
uc010qcz.1,uc001irx.2	uc001irx.2	uc010qcz.1	chr10:23983675..24836771,+	KIAA1217	LUAD_ctrl	LUAD_cancer	ORF_seq_similarity	TRUE	ORF is longer
uc010qcz.1,uc001irx.2	uc001irx.2	uc010qcz.1	chr10:23983675..24836771,+	KIAA1217	LUAD_ctrl	LUAD_cancer	domains_identified	TRUE	Domain loss
uc001iru.3,uc001irx.2	uc001irx.2	uc001iru.3	chr10:23983675..24836771,+	KIAA1217	LUSC_ctrl	LUSC_cancer	intron_retention	TRUE	Intron retention gain
uc001iru.3,uc001irx.2	uc001irx.2	uc001iru.3	chr10:23983675..24836771,+	KIAA1217	LUSC_ctrl	LUSC_cancer	ORF_seq_similarity	TRUE	ORF is shorter
uc001iru.3,uc001isa.1	uc001isa.1	uc001iru.3	chr10:23983675..24836771,+	KIAA1217	LUSC_ctrl	LUSC_cancer	ORF_seq_similarity	TRUE	ORF is shorter
uc001isb.2,uc010qdb.1	uc010qdb.1	uc001isb.2	chr10:24872538..25012597,-	ARHGAP21	THCA_ctrl	THCA_cancer	ORF_seq_similarity	TRUE	Complete ORF loss
uc001isb.2,uc010qdb.1	uc010qdb.1	uc001isb.2	chr10:24872538..25012597,-	ARHGAP21	THCA_ctrl	THCA_cancer	domains_identified	TRUE	Domain loss
uc001isf.1,uc001ise.1	uc001ise.1	uc001isf.1	chr10:25137554..25241533,-	PRTFDC1	LUAD_ctrl	LUAD_cancer	ORF_seq_similarity	TRUE	Complete ORF gain
uc001isf.1,uc001ise.1	uc001ise.1	uc001isf.1	chr10:25137554..25241533,-	PRTFDC1	LUAD_ctrl	LUAD_cancer	domains_identified	TRUE	Domain gain
uc001igt.1,uc001igs.1	uc001igs.1	uc001igt.1	chr10:3179116..3215003,-	PITRM1	KIRC_ctrl	KIRC_cancer	ORF_seq_similarity	TRUE	ORF is shorter
uc001igt.1,uc001igs.1	uc001igs.1	uc001igt.1	chr10:3179116..3215003,-	PITRM1	KIRC_ctrl	KIRC_cancer	domains_identified	TRUE	Domain loss
uc001ivz.1,uc001ivw.1	uc001ivw.1	uc001ivz.1	chr10:32095225..32217770,-	ARHGAP12	KIRC_ctrl	KIRC_cancer	coding_potential	TRUE	Transcript is Noncoding
uc001ivz.1,uc001ivw.1	uc001ivw.1	uc001ivz.1	chr10:32095225..32217770,-	ARHGAP12	KIRC_ctrl	KIRC_cancer	ORF_seq_similarity	TRUE	Complete ORF loss
uc001ivz.1,uc001ivw.1	uc001ivw.1	uc001ivz.1	chr10:32095225..32217770,-	ARHGAP12	KIRC_ctrl	KIRC_cancer	domains_identified	TRUE	Domain loss
uc001ivz.1,uc001ivx.1	uc001ivx.1	uc001ivz.1	chr10:32095225..32217770,-	ARHGAP12	KIRC_ctrl	KIRC_cancer	intron_retention	TRUE	Intron retention gain
uc001ivz.1,uc001ivx.1	uc001ivx.1	uc001ivz.1	chr10:32095225..32217770,-	ARHGAP12	KIRC_ctrl	KIRC_cancer	ORF_seq_similarity	TRUE	ORF is shorter
uc001ivz.1,uc001ivx.1	uc001ivx.1	uc001ivz.1	chr10:32095225..32217770,-	ARHGAP12	KIRC_ctrl	KIRC_cancer	domains_identified	TRUE	Domain loss
uc001iwx.3,uc001iww.3	uc001iww.3	uc001iwx.3	chr10:33466420..33624006,-	NRP1	KICH_ctrl	KICH_cancer	ORF_seq_similarity	TRUE	ORF is shorter
uc001iwx.3,uc001iww.3	uc001iww.3	uc001iwx.3	chr10:33466420..33624006,-	NRP1	KICH_ctrl	KICH_cancer	domains_identified	TRUE	Domain loss
uc001iwx.3,uc001iww.3	uc001iww.3	uc001iwx.3	chr10:33466420..33624006,-	NRP1	KICH_ctrl	KICH_cancer	signal_peptide_identified	TRUE	Signal peptide loss
uc010qej.1,uc001ixo.1	uc001ixo.1	uc010qej.1	chr10:34400098..35103923,-	PARD3	LUSC_ctrl	LUSC_cancer	ORF_seq_similarity	TRUE	ORF is shorter
uc010qej.1,uc001ixo.1	uc001ixo.1	uc010qej.1	chr10:34400098..35103923,-	PARD3	LUSC_ctrl	LUSC_cancer	domains_identified	TRUE	Domain loss
uc010qej.1,uc001ixr.1	uc001ixr.1	uc010qej.1	chr10:34400098..35103923,-	PARD3	LUSC_ctrl	LUSC_cancer	ORF_seq_similarity	TRUE	ORF is shorter
uc001jag.1,uc001jaf.1	uc001jaf.1	uc001jag.1	chr10:43069633..43133992,-	ZNF33B	KICH_ctrl	KICH_cancer	ORF_seq_similarity	TRUE	ORF is longer
uc001jag.1,uc001jaf.1	uc001jaf.1	uc001jag.1	chr10:43069633..43133992,-	ZNF33B	KICH_ctrl	KICH_cancer	domains_identified	TRUE	Domain switch
uc010qfn.1,uc010qfo.1	uc010qfo.1	uc010qfn.1	chr10:46897641..46939143,+	FAM35B	THCA_ctrl	THCA_cancer	ORF_seq_similarity	TRUE	Complete ORF gain
uc001jea.2,uc001jeb.2	uc001jeb.2	uc001jea.2	chr10:46955444..46970601,-	SYT15	LUAD_ctrl	LUAD_cancer	ORF_seq_similarity	TRUE	ORF is shorter
uc001jea.2,uc001jeb.2	uc001jeb.2	uc001jea.2	chr10:46955444..46970601,-	SYT15	LUSC_ctrl	LUSC_cancer	ORF_seq_similarity	TRUE	ORF is shorter
uc010qfq.1,uc001jec.2	uc001jec.2	uc010qfq.1	chr10:46993546..47005643,+	GPRIN2	LUAD_ctrl	LUAD_cancer	ORF_seq_similarity	TRUE	ORF is longer
uc001jem.2,uc001jeo.1	uc001jeo.1	uc001jem.2	chr10:47746920..47770843,+	ANXA8L2	LUAD_ctrl	LUAD_cancer	ORF_seq_similarity	TRUE	Complete ORF loss
uc001jem.2,uc001jeo.1	uc001jeo.1	uc001jem.2	chr10:47746920..47770843,+	ANXA8L2	LUAD_ctrl	LUAD_cancer	domains_identified	TRUE	Domain loss
uc001jem.2,uc001jeo.1	uc001jeo.1	uc001jem.2	chr10:47746920..47770843,+	ANXA8L2	PRAD_ctrl	PRAD_cancer	ORF_seq_similarity	TRUE	Complete ORF loss
uc001jem.2,uc001jeo.1	uc001jeo.1	uc001jem.2	chr10:47746920..47770843,+	ANXA8L2	PRAD_ctrl	PRAD_cancer	domains_identified	TRUE	Domain loss
uc001jep.3,uc001jeq.3	uc001jeq.3	uc001jep.3	chr10:47894023..47949416,+	FAM21B	KIRC_ctrl	KIRC_cancer	ORF_seq_similarity	TRUE	ORF is shorter
uc001jhs.3,uc009xod.2	uc009xod.2	uc001jhs.3	chr10:50664492..50747147,-	ERCC6	THCA_ctrl	THCA_cancer	ORF_seq_similarity	TRUE	ORF is shorter
uc001jhs.3,uc009xod.2	uc009xod.2	uc001jhs.3	chr10:50664492..50747147,-	ERCC6	THCA_ctrl	THCA_cancer	domains_identified	TRUE	Domain loss
uc009xoe.2,uc001jht.2	uc001jht.2	uc009xoe.2	chr10:50723247..50747584,-	PGBD3	THCA_ctrl	THCA_cancer	ORF_seq_similarity	TRUE	ORF is shorter
uc001jie.2,uc010qgu.1	uc010qgu.1	uc001jie.2	chr10:50942688..50970425,-	OGDHL	KIRC_ctrl	KIRC_cancer	ORF_seq_similarity	TRUE	ORF is shorter
uc001jie.2,uc010qgu.1	uc010qgu.1	uc001jie.2	chr10:50942688..50970425,-	OGDHL	KIRP_ctrl	KIRP_cancer	ORF_seq_similarity	TRUE	ORF is shorter
uc001jis.3,uc010qhf.1	uc010qhf.1	uc001jis.3	chr10:51565108..51590733,+	NCOA4	KIRC_ctrl	KIRC_cancer	ORF_seq_similarity	TRUE	ORF is shorter
uc001jis.3,uc010qhf.1	uc010qhf.1	uc001jis.3	chr10:51565108..51590733,+	NCOA4	KIRC_ctrl	KIRC_cancer	domains_identified	TRUE	Domain loss
uc001jis.3,uc010qhf.1	uc010qhf.1	uc001jis.3	chr10:51565108..51590733,+	NCOA4	KIRP_ctrl	KIRP_cancer	ORF_seq_similarity	TRUE	ORF is shorter
uc001jis.3,uc010qhf.1	uc010qhf.1	uc001jis.3	chr10:51565108..51590733,+	NCOA4	KIRP_ctrl	KIRP_cancer	domains_identified	TRUE	Domain loss
uc001jis.3,uc010qhf.1	uc010qhf.1	uc001jis.3	chr10:51565108..51590733,+	NCOA4	THCA_ctrl	THCA_cancer	ORF_seq_similarity	TRUE	ORF is shorter
uc001jis.3,uc010qhf.1	uc010qhf.1	uc001jis.3	chr10:51565108..51590733,+	NCOA4	THCA_ctrl	THCA_cancer	domains_identified	TRUE	Domain loss
uc001jje.2,uc010qhk.1	uc010qhk.1	uc001jje.2	chr10:52065346..52384923,-	SGMS1	KICH_ctrl	KICH_cancer	ORF_seq_similarity	TRUE	ORF is shorter
uc001jje.2,uc010qhk.1	uc010qhk.1	uc001jje.2	chr10:52065346..52384923,-	SGMS1	KICH_ctrl	KICH_cancer	domains_identified	TRUE	Domain loss
uc001jje.2,uc010qhk.1	uc010qhk.1	uc001jje.2	chr10:52065346..52384923,-	SGMS1	THCA_ctrl	THCA_cancer	ORF_seq_similarity	TRUE	ORF is shorter
uc001jje.2,uc010qhk.1	uc010qhk.1	uc001jje.2	chr10:52065346..52384923,-	SGMS1	THCA_ctrl	THCA_cancer	domains_identified	TRUE	Domain loss
uc001iig.2,uc001iii.2	uc001iii.2	uc001iig.2	chr10:5680820..5708558,-	ASB13	KIRP_ctrl	KIRP_cancer	coding_potential	TRUE	Transcript is Noncoding
uc001iig.2,uc001iii.2	uc001iii.2	uc001iig.2	chr10:5680820..5708558,-	ASB13	KIRP_ctrl	KIRP_cancer	ORF_seq_similarity	TRUE	Complete ORF loss
uc001iig.2,uc001iii.2	uc001iii.2	uc001iig.2	chr10:5680820..5708558,-	ASB13	KIRP_ctrl	KIRP_cancer	domains_identified	TRUE	Domain loss
uc001iij.2,uc001iik.2	uc001iik.2	uc001iij.2	chr10:5726801..5806943,+	C10orf18	THCA_ctrl	THCA_cancer	ORF_seq_similarity	TRUE	ORF is shorter
uc001iij.2,uc001iik.2	uc001iik.2	uc001iij.2	chr10:5726801..5806943,+	C10orf18	THCA_ctrl	THCA_cancer	domains_identified	TRUE	Domain loss
uc001iiw.2,uc001iiv.2	uc001iiv.2	uc001iiw.2	chr10:5990859..6020142,-	IL15RA	STAD_ctrl	STAD_cancer	ORF_seq_similarity	TRUE	ORF is longer
uc001iiw.2,uc001iiv.2	uc001iiv.2	uc001iiw.2	chr10:5990859..6020142,-	IL15RA	STAD_ctrl	STAD_cancer	signal_peptide_identified	TRUE	Signal peptide gain
uc001jkw.2,uc001jkv.2	uc001jkv.2	uc001jkw.2	chr10:61788160..62493155,-	ANK3	COAD_ctrl	COAD_cancer	ORF_seq_similarity	TRUE	ORF is shorter
uc001jkw.2,uc001jkv.2	uc001jkv.2	uc001jkw.2	chr10:61788160..62493155,-	ANK3	COAD_ctrl	COAD_cancer	domains_identified	TRUE	Domain loss
uc001ije.2,uc009xil.2	uc009xil.2	uc001ije.2	chr10:6186843..6277505,+	PFKFB3	KICH_ctrl	KICH_cancer	coding_potential	TRUE	Transcript is Noncoding
uc001ije.2,uc009xil.2	uc009xil.2	uc001ije.2	chr10:6186843..6277505,+	PFKFB3	KICH_ctrl	KICH_cancer	ORF_seq_similarity	TRUE	Complete ORF loss
uc001ije.2,uc009xil.2	uc009xil.2	uc001ije.2	chr10:6186843..6277505,+	PFKFB3	KICH_ctrl	KICH_cancer	domains_identified	TRUE	Domain loss
uc001ije.2,uc009xil.2	uc009xil.2	uc001ije.2	chr10:6186843..6277505,+	PFKFB3	KIRP_ctrl	KIRP_cancer	coding_potential	TRUE	Transcript is Noncoding
uc001ije.2,uc009xil.2	uc009xil.2	uc001ije.2	chr10:6186843..6277505,+	PFKFB3	KIRP_ctrl	KIRP_cancer	ORF_seq_similarity	TRUE	Complete ORF loss
uc001ije.2,uc009xil.2	uc009xil.2	uc001ije.2	chr10:6186843..6277505,+	PFKFB3	KIRP_ctrl	KIRP_cancer	domains_identified	TRUE	Domain loss
uc001ijj.1,uc010qax.1	uc010qax.1	uc001ijj.1	chr10:6469105..6622238,-	PRKCQ	THCA_ctrl	THCA_cancer	ORF_seq_similarity	TRUE	ORF is shorter
uc001jnb.2,uc001jnc.2	uc001jnc.2	uc001jnb.2	chr10:69556428..69597937,-	DNAJC12	KIRP_ctrl	KIRP_cancer	ORF_seq_similarity	TRUE	ORF is shorter
uc001jnb.2,uc001jnc.2	uc001jnc.2	uc001jnb.2	chr10:69556428..69597937,-	DNAJC12	LIHC_ctrl	LIHC_cancer	ORF_seq_similarity	TRUE	ORF is shorter
uc001joi.2,uc010qix.1	uc010qix.1	uc001joi.2	chr10:70242098..70287584,-	SLC25A16	COAD_ctrl	COAD_cancer	ORF_seq_similarity	TRUE	ORF is shorter
uc001joi.2,uc010qix.1	uc010qix.1	uc001joi.2	chr10:70242098..70287584,-	SLC25A16	COAD_ctrl	COAD_cancer	domains_identified	TRUE	Domain loss
uc001joi.2,uc010qix.1	uc010qix.1	uc001joi.2	chr10:70242098..70287584,-	SLC25A16	LIHC_ctrl	LIHC_cancer	ORF_seq_similarity	TRUE	ORF is shorter
uc001joi.2,uc010qix.1	uc010qix.1	uc001joi.2	chr10:70242098..70287584,-	SLC25A16	LIHC_ctrl	LIHC_cancer	domains_identified	TRUE	Domain loss
uc001joi.2,uc010qix.1	uc010qix.1	uc001joi.2	chr10:70242098..70287584,-	SLC25A16	STAD_ctrl	STAD_cancer	ORF_seq_similarity	TRUE	ORF is shorter
uc001joi.2,uc010qix.1	uc010qix.1	uc001joi.2	chr10:70242098..70287584,-	SLC25A16	STAD_ctrl	STAD_cancer	domains_identified	TRUE	Domain loss
uc010qje.1,uc001jpf.3	uc001jpf.3	uc010qje.1	chr10:70980059..71027314,+	HKDC1	COAD_ctrl	COAD_cancer	ORF_seq_similarity	TRUE	ORF is longer
uc010qje.1,uc009xqb.2	uc009xqb.2	uc010qje.1	chr10:70980059..71027314,+	HKDC1	COAD_ctrl	COAD_cancer	ORF_seq_similarity	TRUE	Complete ORF loss
uc010qje.1,uc009xqb.2	uc009xqb.2	uc010qje.1	chr10:70980059..71027314,+	HKDC1	COAD_ctrl	COAD_cancer	domains_identified	TRUE	Domain loss
uc001jqx.1,uc001jqy.1	uc001jqy.1	uc001jqx.1	chr10:72058729..72142382,-	LRRC20	STAD_ctrl	STAD_cancer	ORF_seq_similarity	TRUE	ORF is shorter
uc001jqx.1,uc001jqy.1	uc001jqy.1	uc001jqx.1	chr10:72058729..72142382,-	LRRC20	STAD_ctrl	STAD_cancer	domains_identified	TRUE	Domain loss
uc001jrd.3,uc001jre.3	uc001jre.3	uc001jrd.3	chr10:72238564..72328205,+	KIAA1274	KIRP_ctrl	KIRP_cancer	ORF_seq_similarity	TRUE	ORF is shorter
uc001jrd.3,uc001jre.3	uc001jre.3	uc001jrd.3	chr10:72238564..72328205,+	KIAA1274	KIRP_ctrl	KIRP_cancer	domains_identified	TRUE	Domain loss
uc001jrm.2,uc009xqk.2	uc009xqk.2	uc001jrm.2	chr10:72575704..72640930,+	SGPL1	KIRC_ctrl	KIRC_cancer	ORF_seq_similarity	TRUE	Complete ORF loss
uc001jrm.2,uc009xqk.2	uc009xqk.2	uc001jrm.2	chr10:72575704..72640930,+	SGPL1	KIRC_ctrl	KIRC_cancer	domains_identified	TRUE	Domain loss
uc001jrm.2,uc009xqk.2	uc009xqk.2	uc001jrm.2	chr10:72575704..72640930,+	SGPL1	THCA_ctrl	THCA_cancer	ORF_seq_similarity	TRUE	Complete ORF loss
uc001jrm.2,uc009xqk.2	uc009xqk.2	uc001jrm.2	chr10:72575704..72640930,+	SGPL1	THCA_ctrl	THCA_cancer	domains_identified	TRUE	Domain loss
uc001jrr.3,uc001jru.3	uc001jru.3	uc001jrr.3	chr10:73079010..73123145,+	SLC29A3	KIRC_ctrl	KIRC_cancer	ORF_seq_similarity	TRUE	ORF is shorter
uc001jrr.3,uc001jru.3	uc001jru.3	uc001jrr.3	chr10:73079010..73123145,+	SLC29A3	KIRP_ctrl	KIRP_cancer	ORF_seq_similarity	TRUE	ORF is shorter
uc001jrr.3,uc001jru.3	uc001jru.3	uc001jrr.3	chr10:73079010..73123145,+	SLC29A3	THCA_ctrl	THCA_cancer	ORF_seq_similarity	TRUE	ORF is shorter
uc010qjr.1,uc001jry.2	uc001jry.2	uc010qjr.1	chr10:73156704..73575702,+	CDH23	LIHC_ctrl	LIHC_cancer	ORF_seq_similarity	TRUE	ORF is longer
uc010qjr.1,uc001jry.2	uc001jry.2	uc010qjr.1	chr10:73156704..73575702,+	CDH23	LIHC_ctrl	LIHC_cancer	domains_identified	TRUE	Domain gain
uc001jsm.2,uc001jsl.2	uc001jsl.2	uc001jsm.2	chr10:73576056..73611082,-	PSAP	KICH_ctrl	KICH_cancer	ORF_seq_similarity	TRUE	ORF is shorter
uc001jsm.2,uc001jsl.2	uc001jsl.2	uc001jsm.2	chr10:73576056..73611082,-	PSAP	KICH_ctrl	KICH_cancer	domains_identified	TRUE	Domain loss
uc001jsm.2,uc001jsl.2	uc001jsl.2	uc001jsm.2	chr10:73576056..73611082,-	PSAP	KICH_ctrl	KICH_cancer	signal_peptide_identified	TRUE	Signal peptide loss
uc001jsm.2,uc001jsl.2	uc001jsl.2	uc001jsm.2	chr10:73576056..73611082,-	PSAP	KIRP_ctrl	KIRP_cancer	ORF_seq_similarity	TRUE	ORF is shorter
uc001jsm.2,uc001jsl.2	uc001jsl.2	uc001jsm.2	chr10:73576056..73611082,-	PSAP	KIRP_ctrl	KIRP_cancer	domains_identified	TRUE	Domain loss
uc001jsm.2,uc001jsl.2	uc001jsl.2	uc001jsm.2	chr10:73576056..73611082,-	PSAP	KIRP_ctrl	KIRP_cancer	signal_peptide_identified	TRUE	Signal peptide loss
uc001jtb.1,uc010qjx.1	uc010qjx.1	uc001jtb.1	chr10:74127098..74385899,-	CBARA1	THCA_ctrl	THCA_cancer	ORF_seq_similarity	TRUE	ORF is shorter
uc001jte.1,uc009xqs.1	uc009xqs.1	uc001jte.1	chr10:74653339..74692787,+	OIT3	LIHC_ctrl	LIHC_cancer	ORF_seq_similarity	TRUE	Complete ORF loss
uc001jte.1,uc009xqs.1	uc009xqs.1	uc001jte.1	chr10:74653339..74692787,+	OIT3	LIHC_ctrl	LIHC_cancer	domains_identified	TRUE	Domain loss
uc001jte.1,uc009xqs.1	uc009xqs.1	uc001jte.1	chr10:74653339..74692787,+	OIT3	LIHC_ctrl	LIHC_cancer	signal_peptide_identified	TRUE	Signal peptide loss
uc001jug.2,uc001juh.2	uc001juh.2	uc001jug.2	chr10:75196564..75255782,-	PPP3CB	COAD_ctrl	COAD_cancer	ORF_seq_similarity	TRUE	ORF is shorter
uc001jux.2,uc010qkq.1	uc010qkq.1	uc001jux.2	chr10:75504132..75531917,+	SEC24C	STAD_ctrl	STAD_cancer	ORF_seq_similarity	TRUE	ORF is shorter
uc001jux.2,uc010qkq.1	uc010qkq.1	uc001jux.2	chr10:75504132..75531917,+	SEC24C	STAD_ctrl	STAD_cancer	domains_identified	TRUE	Domain loss
uc001jwd.2,uc010qkz.1	uc010qkz.1	uc001jwd.2	chr10:75754951..75879912,+	VCL	COAD_ctrl	COAD_cancer	ORF_seq_similarity	TRUE	ORF is shorter
uc001jwd.2,uc010qkz.1	uc010qkz.1	uc001jwd.2	chr10:75754951..75879912,+	VCL	COAD_ctrl	COAD_cancer	domains_identified	TRUE	Domain loss
uc001jwd.2,uc010qkz.1	uc010qkz.1	uc001jwd.2	chr10:75754951..75879912,+	VCL	PRAD_ctrl	PRAD_cancer	ORF_seq_similarity	TRUE	ORF is shorter
uc001jwd.2,uc010qkz.1	uc010qkz.1	uc001jwd.2	chr10:75754951..75879912,+	VCL	PRAD_ctrl	PRAD_cancer	domains_identified	TRUE	Domain loss
uc001jwd.2,uc001jwe.2	uc001jwe.2	uc001jwd.2	chr10:75754951..75879912,+	VCL	STAD_ctrl	STAD_cancer	domains_identified	TRUE	Domain loss
uc001ijq.2,uc001ijp.2	uc001ijp.2	uc001ijq.2	chr10:7601636..7708934,-	ITIH5	KICH_ctrl	KICH_cancer	ORF_seq_similarity	TRUE	ORF is shorter
uc001ijq.2,uc001ijp.2	uc001ijp.2	uc001ijq.2	chr10:7601636..7708934,-	ITIH5	KICH_ctrl	KICH_cancer	domains_identified	TRUE	Domain loss
uc001ijq.2,uc001ijp.2	uc001ijp.2	uc001ijq.2	chr10:7601636..7708934,-	ITIH5	KICH_ctrl	KICH_cancer	signal_peptide_identified	TRUE	Signal peptide loss
uc001jwn.1,uc001jwo.1	uc001jwo.1	uc001jwn.1	chr10:76586379..76792639,+	MYST4	THCA_ctrl	THCA_cancer	ORF_seq_similarity	TRUE	ORF is shorter
uc001jxm.2,uc001jxs.3	uc001jxs.3	uc001jxm.2	chr10:78629359..79397577,-	KCNMA1	BRCA_ctrl	BRCA_cancer	ORF_seq_similarity	TRUE	ORF is shorter
uc001jxm.2,uc001jxs.3	uc001jxs.3	uc001jxm.2	chr10:78629359..79397577,-	KCNMA1	BRCA_ctrl	BRCA_cancer	domains_identified	TRUE	Domain loss
uc001jxm.2,uc001jxs.3	uc001jxs.3	uc001jxm.2	chr10:78629359..79397577,-	KCNMA1	COAD_ctrl	COAD_cancer	ORF_seq_similarity	TRUE	ORF is shorter
uc001jxm.2,uc001jxs.3	uc001jxs.3	uc001jxm.2	chr10:78629359..79397577,-	KCNMA1	COAD_ctrl	COAD_cancer	domains_identified	TRUE	Domain loss
uc001jxm.2,uc001jxs.3	uc001jxs.3	uc001jxm.2	chr10:78629359..79397577,-	KCNMA1	KIRC_ctrl	KIRC_cancer	ORF_seq_similarity	TRUE	ORF is shorter
uc001jxm.2,uc001jxs.3	uc001jxs.3	uc001jxm.2	chr10:78629359..79397577,-	KCNMA1	KIRC_ctrl	KIRC_cancer	domains_identified	TRUE	Domain loss
uc001jxm.2,uc001jxs.3	uc001jxs.3	uc001jxm.2	chr10:78629359..79397577,-	KCNMA1	KIRP_ctrl	KIRP_cancer	ORF_seq_similarity	TRUE	ORF is shorter
uc001jxm.2,uc001jxs.3	uc001jxs.3	uc001jxm.2	chr10:78629359..79397577,-	KCNMA1	KIRP_ctrl	KIRP_cancer	domains_identified	TRUE	Domain loss
uc001jxm.2,uc001jxs.3	uc001jxs.3	uc001jxm.2	chr10:78629359..79397577,-	KCNMA1	LUSC_ctrl	LUSC_cancer	ORF_seq_similarity	TRUE	ORF is shorter
uc001jxm.2,uc001jxs.3	uc001jxs.3	uc001jxm.2	chr10:78629359..79397577,-	KCNMA1	LUSC_ctrl	LUSC_cancer	domains_identified	TRUE	Domain loss
uc001jxm.2,uc001jxs.3	uc001jxs.3	uc001jxm.2	chr10:78629359..79397577,-	KCNMA1	STAD_ctrl	STAD_cancer	ORF_seq_similarity	TRUE	ORF is shorter
uc001jxm.2,uc001jxs.3	uc001jxs.3	uc001jxm.2	chr10:78629359..79397577,-	KCNMA1	STAD_ctrl	STAD_cancer	domains_identified	TRUE	Domain loss
uc001kaf.2,uc001kag.2	uc001kag.2	uc001kaf.2	chr10:80828792..81076285,+	ZMIZ1	KIRC_ctrl	KIRC_cancer	ORF_seq_similarity	TRUE	ORF is shorter
uc001kak.2,uc010qlr.1	uc010qlr.1	uc001kak.2	chr10:81142085..81205383,-	ZCCHC24	COAD_ctrl	COAD_cancer	domains_identified	TRUE	Domain loss
uc010qlw.1,uc001kbl.2	uc001kbl.2	uc010qlw.1	chr10:81838426..81852306,+	C10orf57	HNSC_ctrl	HNSC_cancer	coding_potential	TRUE	Transcript is Noncoding
uc010qlw.1,uc001kbl.2	uc001kbl.2	uc010qlw.1	chr10:81838426..81852306,+	C10orf57	HNSC_ctrl	HNSC_cancer	ORF_seq_similarity	TRUE	ORF is shorter
uc001kbl.2,uc010qlw.1	uc010qlw.1	uc001kbl.2	chr10:81838426..81852306,+	C10orf57	LUSC_ctrl	LUSC_cancer	coding_potential	TRUE	Transcript is coding
uc001kbl.2,uc010qlw.1	uc010qlw.1	uc001kbl.2	chr10:81838426..81852306,+	C10orf57	LUSC_ctrl	LUSC_cancer	ORF_seq_similarity	TRUE	ORF is longer
uc010qme.1,uc001kdi.1	uc001kdi.1	uc010qme.1	chr10:86088410..86278276,+	FAM190B	BRCA_ctrl	BRCA_cancer	ORF_seq_similarity	TRUE	ORF is shorter
uc010qme.1,uc001kdi.1	uc001kdi.1	uc010qme.1	chr10:86088410..86278276,+	FAM190B	COAD_ctrl	COAD_cancer	ORF_seq_similarity	TRUE	ORF is shorter
uc010qmd.1,uc001kdi.1	uc001kdi.1	uc010qmd.1	chr10:86088410..86278276,+	FAM190B	KICH_ctrl	KICH_cancer	ORF_seq_similarity	TRUE	ORF is shorter
uc010qme.1,uc001kdi.1	uc001kdi.1	uc010qme.1	chr10:86088410..86278276,+	FAM190B	PRAD_ctrl	PRAD_cancer	ORF_seq_similarity	TRUE	ORF is shorter
uc001kdr.2,uc009xsz.2	uc009xsz.2	uc001kdr.2	chr10:88426551..88495822,+	LDB3	HNSC_ctrl	HNSC_cancer	intron_retention	TRUE	Intron retention loss
uc001kdr.2,uc009xsz.2	uc009xsz.2	uc001kdr.2	chr10:88426551..88495822,+	LDB3	HNSC_ctrl	HNSC_cancer	ORF_seq_similarity	TRUE	ORF is longer
uc001kdr.2,uc009xsz.2	uc009xsz.2	uc001kdr.2	chr10:88426551..88495822,+	LDB3	HNSC_ctrl	HNSC_cancer	domains_identified	TRUE	Domain gain
uc001kez.1,uc010qmr.1	uc010qmr.1	uc001kez.1	chr10:89512875..89577917,-	ATAD1	KICH_ctrl	KICH_cancer	ORF_seq_similarity	TRUE	ORF is shorter
uc001kga.3,uc010qnf.1	uc010qnf.1	uc001kga.3	chr10:90973328..91174382,-	LIPA	KICH_ctrl	KICH_cancer	ORF_seq_similarity	TRUE	ORF is shorter
uc001kga.3,uc010qnf.1	uc010qnf.1	uc001kga.3	chr10:90973328..91174382,-	LIPA	KICH_ctrl	KICH_cancer	domains_identified	TRUE	Domain loss
uc001kga.3,uc010qnf.1	uc010qnf.1	uc001kga.3	chr10:90973328..91174382,-	LIPA	KICH_ctrl	KICH_cancer	signal_peptide_identified	TRUE	Signal peptide loss
uc001kga.3,uc010qnf.1	uc010qnf.1	uc001kga.3	chr10:90973328..91174382,-	LIPA	KIRC_ctrl	KIRC_cancer	ORF_seq_similarity	TRUE	ORF is shorter
uc001kga.3,uc010qnf.1	uc010qnf.1	uc001kga.3	chr10:90973328..91174382,-	LIPA	KIRC_ctrl	KIRC_cancer	domains_identified	TRUE	Domain loss
uc001kga.3,uc010qnf.1	uc010qnf.1	uc001kga.3	chr10:90973328..91174382,-	LIPA	KIRC_ctrl	KIRC_cancer	signal_peptide_identified	TRUE	Signal peptide loss
uc001kga.3,uc010qnf.1	uc010qnf.1	uc001kga.3	chr10:90973328..91174382,-	LIPA	KIRP_ctrl	KIRP_cancer	ORF_seq_similarity	TRUE	ORF is shorter
uc001kga.3,uc010qnf.1	uc010qnf.1	uc001kga.3	chr10:90973328..91174382,-	LIPA	KIRP_ctrl	KIRP_cancer	domains_identified	TRUE	Domain loss
uc001kga.3,uc010qnf.1	uc010qnf.1	uc001kga.3	chr10:90973328..91174382,-	LIPA	KIRP_ctrl	KIRP_cancer	signal_peptide_identified	TRUE	Signal peptide loss
uc001kga.3,uc010qnf.1	uc010qnf.1	uc001kga.3	chr10:90973328..91174382,-	LIPA	STAD_ctrl	STAD_cancer	ORF_seq_similarity	TRUE	ORF is shorter
uc001kga.3,uc010qnf.1	uc010qnf.1	uc001kga.3	chr10:90973328..91174382,-	LIPA	STAD_ctrl	STAD_cancer	domains_identified	TRUE	Domain loss
uc001kga.3,uc010qnf.1	uc010qnf.1	uc001kga.3	chr10:90973328..91174382,-	LIPA	STAD_ctrl	STAD_cancer	signal_peptide_identified	TRUE	Signal peptide loss
uc001kga.3,uc010qnf.1	uc010qnf.1	uc001kga.3	chr10:90973328..91174382,-	LIPA	THCA_ctrl	THCA_cancer	ORF_seq_similarity	TRUE	ORF is shorter
uc001kga.3,uc010qnf.1	uc010qnf.1	uc001kga.3	chr10:90973328..91174382,-	LIPA	THCA_ctrl	THCA_cancer	domains_identified	TRUE	Domain loss
uc001kga.3,uc010qnf.1	uc010qnf.1	uc001kga.3	chr10:90973328..91174382,-	LIPA	THCA_ctrl	THCA_cancer	signal_peptide_identified	TRUE	Signal peptide loss
uc001kgm.2,uc001kgl.2	uc001kgl.2	uc001kgm.2	chr10:91190056..91295313,-	SLC16A12	KICH_ctrl	KICH_cancer	ORF_seq_similarity	TRUE	ORF is shorter
uc001kgm.2,uc001kgl.2	uc001kgl.2	uc001kgm.2	chr10:91190056..91295313,-	SLC16A12	KIRC_ctrl	KIRC_cancer	ORF_seq_similarity	TRUE	ORF is shorter
uc001kgm.2,uc001kgl.2	uc001kgl.2	uc001kgm.2	chr10:91190056..91295313,-	SLC16A12	KIRP_ctrl	KIRP_cancer	ORF_seq_similarity	TRUE	ORF is shorter
uc001kgn.1,uc001kgo.1	uc001kgo.1	uc001kgn.1	chr10:91342749..91405215,-	PANK1	LIHC_ctrl	LIHC_cancer	ORF_seq_similarity	TRUE	ORF is shorter
uc001khd.2,uc009xtx.2	uc009xtx.2	uc001khd.2	chr10:92631474..92668312,+	RPP30	KICH_ctrl	KICH_cancer	ORF_seq_similarity	TRUE	ORF is shorter
uc001khd.2,uc009xtx.2	uc009xtx.2	uc001khd.2	chr10:92631474..92668312,+	RPP30	KICH_ctrl	KICH_cancer	domains_identified	TRUE	Domain loss
uc001khh.2,uc001khg.2	uc001khg.2	uc001khh.2	chr10:92922775..93044020,+	PCGF5	BRCA_ctrl	BRCA_cancer	coding_potential	TRUE	Transcript is Noncoding
uc001khh.2,uc001khg.2	uc001khg.2	uc001khh.2	chr10:92922775..93044020,+	PCGF5	BRCA_ctrl	BRCA_cancer	ORF_seq_similarity	TRUE	Complete ORF loss
uc001khh.2,uc001khg.2	uc001khg.2	uc001khh.2	chr10:92922775..93044020,+	PCGF5	BRCA_ctrl	BRCA_cancer	domains_identified	TRUE	Domain loss
uc001khh.2,uc001khg.2	uc001khg.2	uc001khh.2	chr10:92922775..93044020,+	PCGF5	LIHC_ctrl	LIHC_cancer	coding_potential	TRUE	Transcript is Noncoding
uc001khh.2,uc001khg.2	uc001khg.2	uc001khh.2	chr10:92922775..93044020,+	PCGF5	LIHC_ctrl	LIHC_cancer	ORF_seq_similarity	TRUE	Complete ORF loss
uc001khh.2,uc001khg.2	uc001khg.2	uc001khh.2	chr10:92922775..93044020,+	PCGF5	LIHC_ctrl	LIHC_cancer	domains_identified	TRUE	Domain loss
uc001khh.2,uc001khg.2	uc001khg.2	uc001khh.2	chr10:92922775..93044020,+	PCGF5	PRAD_ctrl	PRAD_cancer	coding_potential	TRUE	Transcript is Noncoding
uc001khh.2,uc001khg.2	uc001khg.2	uc001khh.2	chr10:92922775..93044020,+	PCGF5	PRAD_ctrl	PRAD_cancer	ORF_seq_similarity	TRUE	Complete ORF loss
uc001khh.2,uc001khg.2	uc001khg.2	uc001khh.2	chr10:92922775..93044020,+	PCGF5	PRAD_ctrl	PRAD_cancer	domains_identified	TRUE	Domain loss
uc010qnq.1,uc001kic.2	uc001kic.2	uc010qnq.1	chr10:94352825..94415150,+	KIF11	LUAD_ctrl	LUAD_cancer	coding_potential	TRUE	Transcript is coding
uc010qnq.1,uc001kic.2	uc001kic.2	uc010qnq.1	chr10:94352825..94415150,+	KIF11	LUAD_ctrl	LUAD_cancer	ORF_seq_similarity	TRUE	Complete ORF gain
uc010qnq.1,uc001kic.2	uc001kic.2	uc010qnq.1	chr10:94352825..94415150,+	KIF11	LUAD_ctrl	LUAD_cancer	domains_identified	TRUE	Domain gain
uc010qnq.1,uc001kic.2	uc001kic.2	uc010qnq.1	chr10:94352825..94415150,+	KIF11	LUSC_ctrl	LUSC_cancer	coding_potential	TRUE	Transcript is coding
uc010qnq.1,uc001kic.2	uc001kic.2	uc010qnq.1	chr10:94352825..94415150,+	KIF11	LUSC_ctrl	LUSC_cancer	ORF_seq_similarity	TRUE	Complete ORF gain
uc010qnq.1,uc001kic.2	uc001kic.2	uc010qnq.1	chr10:94352825..94415150,+	KIF11	LUSC_ctrl	LUSC_cancer	domains_identified	TRUE	Domain gain
uc001kig.2,uc001kih.2	uc001kih.2	uc001kig.2	chr10:94590935..94819250,+	EXOC6	THCA_ctrl	THCA_cancer	ORF_seq_similarity	TRUE	Complete ORF loss
uc001kig.2,uc001kih.2	uc001kih.2	uc001kig.2	chr10:94590935..94819250,+	EXOC6	THCA_ctrl	THCA_cancer	domains_identified	TRUE	Domain loss
uc001kin.2,uc009xue.2	uc009xue.2	uc001kin.2	chr10:95066187..95242074,-	MYOF	BRCA_ctrl	BRCA_cancer	ORF_seq_similarity	TRUE	Complete ORF loss
uc001kin.2,uc009xue.2	uc009xue.2	uc001kin.2	chr10:95066187..95242074,-	MYOF	BRCA_ctrl	BRCA_cancer	domains_identified	TRUE	Domain loss
uc001kjj.2,uc010qnw.1	uc010qnw.1	uc001kjj.2	chr10:95653730..95713998,+	TMEM20	LUSC_ctrl	LUSC_cancer	coding_potential	TRUE	Transcript is coding
uc001kjj.2,uc010qnw.1	uc010qnw.1	uc001kjj.2	chr10:95653730..95713998,+	TMEM20	LUSC_ctrl	LUSC_cancer	ORF_seq_similarity	TRUE	Complete ORF gain
uc001kjj.2,uc010qnw.1	uc010qnw.1	uc001kjj.2	chr10:95653730..95713998,+	TMEM20	LUSC_ctrl	LUSC_cancer	domains_identified	TRUE	Domain gain
uc001kjk.2,uc001kjp.2	uc001kjp.2	uc001kjk.2	chr10:95753746..96088146,+	PLCE1	KIRC_ctrl	KIRC_cancer	ORF_seq_similarity	TRUE	ORF is shorter
uc001kjk.2,uc001kjp.2	uc001kjp.2	uc001kjk.2	chr10:95753746..96088146,+	PLCE1	KIRC_ctrl	KIRC_cancer	domains_identified	TRUE	Domain loss
uc010qnz.1,uc010qny.1	uc010qny.1	uc010qnz.1	chr10:96447882..96612670,+	CYP2C19	LIHC_ctrl	LIHC_cancer	signal_peptide_identified	TRUE	Signal peptide loss
uc001kkv.2,uc001kks.2	uc001kks.2	uc001kkv.2	chr10:97071531..97321171,-	SORBS1	KICH_ctrl	KICH_cancer	ORF_seq_similarity	TRUE	ORF is shorter
uc001kkz.2,uc010qoh.1	uc010qoh.1	uc001kkz.2	chr10:97365687..97416567,-	ALDH18A1	BRCA_ctrl	BRCA_cancer	ORF_seq_similarity	TRUE	ORF is shorter
uc001kky.2,uc010qoh.1	uc010qoh.1	uc001kky.2	chr10:97365687..97416567,-	ALDH18A1	COAD_ctrl	COAD_cancer	ORF_seq_similarity	TRUE	ORF is shorter
uc001kkz.2,uc010qoh.1	uc010qoh.1	uc001kkz.2	chr10:97365687..97416567,-	ALDH18A1	KIRC_ctrl	KIRC_cancer	ORF_seq_similarity	TRUE	ORF is shorter
uc001kkz.2,uc010qoh.1	uc010qoh.1	uc001kkz.2	chr10:97365687..97416567,-	ALDH18A1	KIRP_ctrl	KIRP_cancer	ORF_seq_similarity	TRUE	ORF is shorter
uc001kkz.2,uc010qoh.1	uc010qoh.1	uc001kkz.2	chr10:97365687..97416567,-	ALDH18A1	THCA_ctrl	THCA_cancer	ORF_seq_similarity	TRUE	ORF is shorter
uc001klb.3,uc001kla.3	uc001kla.3	uc001klb.3	chr10:97423154..97453900,-	TCTN3	STAD_ctrl	STAD_cancer	ORF_seq_similarity	TRUE	ORF is shorter
uc001klb.3,uc001kla.3	uc001kla.3	uc001klb.3	chr10:97423154..97453900,-	TCTN3	STAD_ctrl	STAD_cancer	signal_peptide_identified	TRUE	Signal peptide loss
uc001klb.3,uc001kla.3	uc001kla.3	uc001klb.3	chr10:97423154..97453900,-	TCTN3	THCA_ctrl	THCA_cancer	ORF_seq_similarity	TRUE	ORF is shorter
uc001klb.3,uc001kla.3	uc001kla.3	uc001klb.3	chr10:97423154..97453900,-	TCTN3	THCA_ctrl	THCA_cancer	signal_peptide_identified	TRUE	Signal peptide loss
uc010qoj.1,uc001kle.1	uc001kle.1	uc010qoj.1	chr10:97471536..97637022,+	ENTPD1	KIRC_ctrl	KIRC_cancer	ORF_seq_similarity	TRUE	ORF is shorter
uc010qoj.1,uc001kle.1	uc001kle.1	uc010qoj.1	chr10:97471536..97637022,+	ENTPD1	THCA_ctrl	THCA_cancer	ORF_seq_similarity	TRUE	ORF is shorter
uc001kmp.2,uc001kmo.2	uc001kmo.2	uc001kmp.2	chr10:98353071..98480279,-	PIK3AP1	COAD_ctrl	COAD_cancer	ORF_seq_similarity	TRUE	ORF is shorter
uc001kmp.2,uc001kmo.2	uc001kmo.2	uc001kmp.2	chr10:98353071..98480279,-	PIK3AP1	COAD_ctrl	COAD_cancer	domains_identified	TRUE	Domain loss
uc001kmp.2,uc001kmo.2	uc001kmo.2	uc001kmp.2	chr10:98353071..98480279,-	PIK3AP1	KIRC_ctrl	KIRC_cancer	ORF_seq_similarity	TRUE	ORF is shorter
uc001kmp.2,uc001kmo.2	uc001kmo.2	uc001kmp.2	chr10:98353071..98480279,-	PIK3AP1	KIRC_ctrl	KIRC_cancer	domains_identified	TRUE	Domain loss
uc001kmp.2,uc001kmo.2	uc001kmo.2	uc001kmp.2	chr10:98353071..98480279,-	PIK3AP1	THCA_ctrl	THCA_cancer	ORF_seq_similarity	TRUE	ORF is shorter
uc001kmp.2,uc001kmo.2	uc001kmo.2	uc001kmp.2	chr10:98353071..98480279,-	PIK3AP1	THCA_ctrl	THCA_cancer	domains_identified	TRUE	Domain loss
uc001kna.2,uc009xvk.2	uc009xvk.2	uc001kna.2	chr10:98912804..99052413,-	ARHGAP19	BRCA_ctrl	BRCA_cancer	ORF_seq_similarity	TRUE	ORF is shorter
uc001knb.2,uc009xvk.2	uc009xvk.2	uc001knb.2	chr10:98912804..99052413,-	ARHGAP19	THCA_ctrl	THCA_cancer	ORF_seq_similarity	TRUE	ORF is shorter
uc001knt.2,uc001knq.2	uc001knq.2	uc001knt.2	chr10:99218083..99258513,-	MMS19	KIRP_ctrl	KIRP_cancer	ORF_seq_similarity	TRUE	ORF is shorter
uc001knt.2,uc001knq.2	uc001knq.2	uc001knt.2	chr10:99218083..99258513,-	MMS19	KIRP_ctrl	KIRP_cancer	domains_identified	TRUE	Domain loss
uc001kny.2,uc001knz.2	uc001knz.2	uc001kny.2	chr10:99344102..99372553,+	DHDPSL	KICH_ctrl	KICH_cancer	ORF_seq_similarity	TRUE	ORF is shorter
uc001kny.2,uc001knz.2	uc001knz.2	uc001kny.2	chr10:99344102..99372553,+	DHDPSL	KIRC_ctrl	KIRC_cancer	ORF_seq_similarity	TRUE	ORF is shorter
uc001kny.2,uc001knz.2	uc001knz.2	uc001kny.2	chr10:99344102..99372553,+	DHDPSL	KIRP_ctrl	KIRP_cancer	ORF_seq_similarity	TRUE	ORF is shorter
uc001kny.2,uc001knz.2	uc001knz.2	uc001kny.2	chr10:99344102..99372553,+	DHDPSL	LIHC_ctrl	LIHC_cancer	ORF_seq_similarity	TRUE	ORF is shorter
uc001kog.1,uc009xvw.1	uc009xvw.1	uc001kog.1	chr10:99344102..99436187,+	PI4K2A	KIRC_ctrl	KIRC_cancer	ORF_seq_similarity	TRUE	ORF is shorter
uc001kog.1,uc009xvw.1	uc009xvw.1	uc001kog.1	chr10:99344102..99436187,+	PI4K2A	KIRC_ctrl	KIRC_cancer	domains_identified	TRUE	Domain loss
uc001kog.1,uc009xvw.1	uc009xvw.1	uc001kog.1	chr10:99344102..99436187,+	PI4K2A	KIRP_ctrl	KIRP_cancer	ORF_seq_similarity	TRUE	ORF is shorter
uc001kog.1,uc009xvw.1	uc009xvw.1	uc001kog.1	chr10:99344102..99436187,+	PI4K2A	KIRP_ctrl	KIRP_cancer	domains_identified	TRUE	Domain loss
uc001kop.2,uc010qpa.1	uc010qpa.1	uc001kop.2	chr10:99496880..99520652,+	ZFYVE27	KIRP_ctrl	KIRP_cancer	ORF_seq_similarity	TRUE	ORF is shorter
uc001kou.1,uc001kot.1	uc001kot.1	uc001kou.1	chr10:99624758..99790585,-	CRTAC1	BRCA_ctrl	BRCA_cancer	ORF_seq_similarity	TRUE	ORF is shorter
uc001kou.1,uc001kot.1	uc001kot.1	uc001kou.1	chr10:99624758..99790585,-	CRTAC1	BRCA_ctrl	BRCA_cancer	domains_identified	TRUE	Domain loss
uc001kou.1,uc001kot.1	uc001kot.1	uc001kou.1	chr10:99624758..99790585,-	CRTAC1	BRCA_ctrl	BRCA_cancer	signal_peptide_identified	TRUE	Signal peptide loss
uc001kou.1,uc001kot.1	uc001kot.1	uc001kou.1	chr10:99624758..99790585,-	CRTAC1	LUSC_ctrl	LUSC_cancer	ORF_seq_similarity	TRUE	ORF is shorter
uc001kou.1,uc001kot.1	uc001kot.1	uc001kou.1	chr10:99624758..99790585,-	CRTAC1	LUSC_ctrl	LUSC_cancer	domains_identified	TRUE	Domain loss
uc001kou.1,uc001kot.1	uc001kot.1	uc001kou.1	chr10:99624758..99790585,-	CRTAC1	LUSC_ctrl	LUSC_cancer	signal_peptide_identified	TRUE	Signal peptide loss
uc001pho.2,uc009yxe.1	uc009yxe.1	uc001pho.2	chr11:102980160..103350591,+	DYNC2H1	THCA_ctrl	THCA_cancer	ORF_seq_similarity	TRUE	ORF is shorter
uc001pho.2,uc009yxe.1	uc009yxe.1	uc001pho.2	chr11:102980160..103350591,+	DYNC2H1	THCA_ctrl	THCA_cancer	domains_identified	TRUE	Domain loss
uc001miw.2,uc010rcd.1	uc010rcd.1	uc001miw.2	chr11:10594638..10715535,-	MRVI1	KIRC_ctrl	KIRC_cancer	ORF_seq_similarity	TRUE	ORF is shorter
uc001miw.2,uc010rcd.1	uc010rcd.1	uc001miw.2	chr11:10594638..10715535,-	MRVI1	LUSC_ctrl	LUSC_cancer	ORF_seq_similarity	TRUE	ORF is shorter
uc001pjc.1,uc001pjd.1	uc001pjd.1	uc001pjc.1	chr11:105948292..105969419,+	AASDHPPT	THCA_ctrl	THCA_cancer	ORF_seq_similarity	TRUE	ORF is shorter
uc009yxp.2,uc001pjk.2	uc001pjk.2	uc009yxp.2	chr11:107373454..107436461,-	ALKBH8	THCA_ctrl	THCA_cancer	ORF_seq_similarity	TRUE	ORF is shorter
uc009yxp.2,uc001pjk.2	uc001pjk.2	uc009yxp.2	chr11:107373454..107436461,-	ALKBH8	THCA_ctrl	THCA_cancer	domains_identified	TRUE	Domain loss
uc001pjq.2,uc010rvu.1	uc010rvu.1	uc001pjq.2	chr11:107661720..107729914,-	SLC35F2	STAD_ctrl	STAD_cancer	ORF_seq_similarity	TRUE	ORF is shorter
uc001pjz.3,uc010rvv.1	uc010rvv.1	uc001pjz.3	chr11:108028121..108093365,-	NPAT	THCA_ctrl	THCA_cancer	ORF_seq_similarity	TRUE	ORF is shorter
uc001mjc.2,uc009ygf.2	uc009ygf.2	uc001mjc.2	chr11:10818594..10830582,-	EIF4G2	KICH_ctrl	KICH_cancer	ORF_seq_similarity	TRUE	ORF is shorter
uc001mjc.2,uc009ygf.2	uc009ygf.2	uc001mjc.2	chr11:10818594..10830582,-	EIF4G2	KIRC_ctrl	KIRC_cancer	ORF_seq_similarity	TRUE	ORF is shorter
uc001mjc.2,uc009ygf.2	uc009ygf.2	uc001mjc.2	chr11:10818594..10830582,-	EIF4G2	STAD_ctrl	STAD_cancer	ORF_seq_similarity	TRUE	ORF is shorter
uc001mjc.2,uc009ygf.2	uc009ygf.2	uc001mjc.2	chr11:10818594..10830582,-	EIF4G2	THCA_ctrl	THCA_cancer	ORF_seq_similarity	TRUE	ORF is shorter
uc001pku.2,uc001pkt.2	uc001pkt.2	uc001pku.2	chr11:110045605..110167437,-	RDX	THCA_ctrl	THCA_cancer	ORF_seq_similarity	TRUE	ORF is shorter
uc001pku.2,uc001pkt.2	uc001pkt.2	uc001pku.2	chr11:110045605..110167437,-	RDX	THCA_ctrl	THCA_cancer	domains_identified	TRUE	Domain loss
uc001pld.2,uc001ple.2	uc001ple.2	uc001pld.2	chr11:111164171..111175770,-	C11orf92	PRAD_ctrl	PRAD_cancer	ORF_seq_similarity	TRUE	Complete ORF loss
uc001pmn.2,uc010rwq.1	uc010rwq.1	uc001pmn.2	chr11:111800585..111893305,+	DIXDC1	KIRC_ctrl	KIRC_cancer	intron_retention	TRUE	Intron retention loss
uc001pmn.2,uc010rwq.1	uc010rwq.1	uc001pmn.2	chr11:111800585..111893305,+	DIXDC1	KIRC_ctrl	KIRC_cancer	ORF_seq_similarity	TRUE	ORF is shorter
uc001pmn.2,uc010rwq.1	uc010rwq.1	uc001pmn.2	chr11:111800585..111893305,+	DIXDC1	KIRP_ctrl	KIRP_cancer	intron_retention	TRUE	Intron retention loss
uc001pmn.2,uc010rwq.1	uc010rwq.1	uc001pmn.2	chr11:111800585..111893305,+	DIXDC1	KIRP_ctrl	KIRP_cancer	ORF_seq_similarity	TRUE	ORF is shorter
uc001pnr.2,uc001pns.2	uc001pns.2	uc001pnr.2	chr11:112831995..113149157,+	NCAM1	BRCA_ctrl	BRCA_cancer	ORF_seq_similarity	TRUE	Complete ORF gain
uc001pnr.2,uc001pns.2	uc001pns.2	uc001pnr.2	chr11:112831995..113149157,+	NCAM1	BRCA_ctrl	BRCA_cancer	domains_identified	TRUE	Domain gain
uc001pnp.2,uc001pns.2	uc001pns.2	uc001pnp.2	chr11:112831995..113149157,+	NCAM1	STAD_ctrl	STAD_cancer	ORF_seq_similarity	TRUE	Complete ORF gain
uc001pnp.2,uc001pns.2	uc001pns.2	uc001pnp.2	chr11:112831995..113149157,+	NCAM1	STAD_ctrl	STAD_cancer	domains_identified	TRUE	Domain gain
uc010rwy.1,uc001pog.2	uc001pog.2	uc010rwy.1	chr11:113668598..113746256,-	USP28	KIRC_ctrl	KIRC_cancer	ORF_seq_similarity	TRUE	ORF is shorter
uc001pro.1,uc001prn.1	uc001prn.1	uc001pro.1	chr11:117707693..117747367,-	FXYD6	COAD_ctrl	COAD_cancer	intron_retention	TRUE	Intron retention gain
uc001pro.1,uc001prn.1	uc001prn.1	uc001pro.1	chr11:117707693..117747367,-	FXYD6	COAD_ctrl	COAD_cancer	coding_potential	TRUE	Transcript is Noncoding
uc001pro.1,uc001prn.1	uc001prn.1	uc001pro.1	chr11:117707693..117747367,-	FXYD6	COAD_ctrl	COAD_cancer	ORF_seq_similarity	TRUE	Complete ORF loss
uc001pro.1,uc001prn.1	uc001prn.1	uc001pro.1	chr11:117707693..117747367,-	FXYD6	COAD_ctrl	COAD_cancer	domains_identified	TRUE	Domain loss
uc001pro.1,uc001prn.1	uc001prn.1	uc001pro.1	chr11:117707693..117747367,-	FXYD6	COAD_ctrl	COAD_cancer	signal_peptide_identified	TRUE	Signal peptide loss
uc001pro.1,uc001prn.1	uc001prn.1	uc001pro.1	chr11:117707693..117747367,-	FXYD6	KICH_ctrl	KICH_cancer	intron_retention	TRUE	Intron retention gain
uc001pro.1,uc001prn.1	uc001prn.1	uc001pro.1	chr11:117707693..117747367,-	FXYD6	KICH_ctrl	KICH_cancer	coding_potential	TRUE	Transcript is Noncoding
uc001pro.1,uc001prn.1	uc001prn.1	uc001pro.1	chr11:117707693..117747367,-	FXYD6	KICH_ctrl	KICH_cancer	ORF_seq_similarity	TRUE	Complete ORF loss
uc001pro.1,uc001prn.1	uc001prn.1	uc001pro.1	chr11:117707693..117747367,-	FXYD6	KICH_ctrl	KICH_cancer	domains_identified	TRUE	Domain loss
uc001pro.1,uc001prn.1	uc001prn.1	uc001pro.1	chr11:117707693..117747367,-	FXYD6	KICH_ctrl	KICH_cancer	signal_peptide_identified	TRUE	Signal peptide loss
uc001prn.1,uc001prr.1	uc001prr.1	uc001prn.1	chr11:117707693..117747367,-	FXYD6	KIRC_ctrl	KIRC_cancer	coding_potential	TRUE	Transcript is coding
uc001prn.1,uc001prr.1	uc001prr.1	uc001prn.1	chr11:117707693..117747367,-	FXYD6	KIRC_ctrl	KIRC_cancer	ORF_seq_similarity	TRUE	Complete ORF gain
uc001prn.1,uc001prr.1	uc001prr.1	uc001prn.1	chr11:117707693..117747367,-	FXYD6	KIRC_ctrl	KIRC_cancer	domains_identified	TRUE	Domain gain
uc001prn.1,uc001prr.1	uc001prr.1	uc001prn.1	chr11:117707693..117747367,-	FXYD6	KIRC_ctrl	KIRC_cancer	signal_peptide_identified	TRUE	Signal peptide gain
uc001prs.1,uc001pru.1	uc001pru.1	uc001prs.1	chr11:117771360..117800115,-	TMPRSS13	THCA_ctrl	THCA_cancer	ORF_seq_similarity	TRUE	ORF is shorter
uc001pse.2,uc010rxv.1	uc010rxv.1	uc001pse.2	chr11:118004094..118023630,-	SCN4B	LUAD_ctrl	LUAD_cancer	coding_potential	TRUE	Transcript is Noncoding
uc001pse.2,uc010rxv.1	uc010rxv.1	uc001pse.2	chr11:118004094..118023630,-	SCN4B	LUAD_ctrl	LUAD_cancer	ORF_seq_similarity	TRUE	ORF is shorter
uc001pse.2,uc010rxv.1	uc010rxv.1	uc001pse.2	chr11:118004094..118023630,-	SCN4B	LUAD_ctrl	LUAD_cancer	domains_identified	TRUE	Domain loss
uc001pse.2,uc010rxv.1	uc010rxv.1	uc001pse.2	chr11:118004094..118023630,-	SCN4B	LUAD_ctrl	LUAD_cancer	signal_peptide_identified	TRUE	Signal peptide loss
uc001ptq.2,uc009zah.2	uc009zah.2	uc001ptq.2	chr11:118443102..118473745,+	ARCN1	KIRP_ctrl	KIRP_cancer	coding_potential	TRUE	Transcript is Noncoding
uc001ptq.2,uc009zah.2	uc009zah.2	uc001ptq.2	chr11:118443102..118473745,+	ARCN1	KIRP_ctrl	KIRP_cancer	ORF_seq_similarity	TRUE	ORF is shorter
uc001ptq.2,uc009zah.2	uc009zah.2	uc001ptq.2	chr11:118443102..118473745,+	ARCN1	KIRP_ctrl	KIRP_cancer	domains_identified	TRUE	Domain loss
uc001ptq.2,uc009zah.2	uc009zah.2	uc001ptq.2	chr11:118443102..118473745,+	ARCN1	THCA_ctrl	THCA_cancer	coding_potential	TRUE	Transcript is Noncoding
uc001ptq.2,uc009zah.2	uc009zah.2	uc001ptq.2	chr11:118443102..118473745,+	ARCN1	THCA_ctrl	THCA_cancer	ORF_seq_similarity	TRUE	ORF is shorter
uc001ptq.2,uc009zah.2	uc009zah.2	uc001ptq.2	chr11:118443102..118473745,+	ARCN1	THCA_ctrl	THCA_cancer	domains_identified	TRUE	Domain loss
uc001ptw.1,uc009zai.1	uc009zai.1	uc001ptw.1	chr11:118477213..118528741,+	PHLDB1	COAD_ctrl	COAD_cancer	ORF_seq_similarity	TRUE	ORF is shorter
uc001ptt.2,uc009zai.1	uc009zai.1	uc001ptt.2	chr11:118477213..118528741,+	PHLDB1	KICH_ctrl	KICH_cancer	ORF_seq_similarity	TRUE	ORF is shorter
uc001pty.1,uc001ptz.1	uc001ptz.1	uc001pty.1	chr11:118528942..118550381,-	TREH	KIRP_ctrl	KIRP_cancer	intron_retention	TRUE	Intron retention gain
uc001pty.1,uc001ptz.1	uc001ptz.1	uc001pty.1	chr11:118528942..118550381,-	TREH	KIRP_ctrl	KIRP_cancer	ORF_seq_similarity	TRUE	ORF is shorter
uc001pty.1,uc001ptz.1	uc001ptz.1	uc001pty.1	chr11:118528942..118550381,-	TREH	KIRP_ctrl	KIRP_cancer	signal_peptide_identified	TRUE	Signal peptide loss
uc001pub.2,uc001pua.2	uc001pua.2	uc001pub.2	chr11:118618473..118661972,-	DDX6	KIRC_ctrl	KIRC_cancer	ORF_seq_similarity	TRUE	ORF is shorter
uc001pub.2,uc001pua.2	uc001pua.2	uc001pub.2	chr11:118618473..118661972,-	DDX6	KIRC_ctrl	KIRC_cancer	domains_identified	TRUE	Domain loss
uc001puc.2,uc001pua.2	uc001pua.2	uc001puc.2	chr11:118618473..118661972,-	DDX6	KIRC_ctrl	KIRC_cancer	ORF_seq_similarity	TRUE	ORF is shorter
uc001puc.2,uc001pua.2	uc001pua.2	uc001puc.2	chr11:118618473..118661972,-	DDX6	KIRC_ctrl	KIRC_cancer	domains_identified	TRUE	Domain loss
uc001pub.2,uc001pua.2	uc001pua.2	uc001pub.2	chr11:118618473..118661972,-	DDX6	THCA_ctrl	THCA_cancer	ORF_seq_similarity	TRUE	ORF is shorter
uc001pub.2,uc001pua.2	uc001pua.2	uc001pub.2	chr11:118618473..118661972,-	DDX6	THCA_ctrl	THCA_cancer	domains_identified	TRUE	Domain loss
uc001mjs.2,uc009ygi.2	uc009ygi.2	uc001mjs.2	chr11:11862970..11980870,+	USP47	LIHC_ctrl	LIHC_cancer	ORF_seq_similarity	TRUE	ORF is shorter
uc001mjs.2,uc009ygi.2	uc009ygi.2	uc001mjs.2	chr11:11862970..11980870,+	USP47	LIHC_ctrl	LIHC_cancer	domains_identified	TRUE	Domain loss
uc010ryl.1,uc001pul.2	uc001pul.2	uc010ryl.1	chr11:118868852..118886454,+	CCDC84	BRCA_ctrl	BRCA_cancer	ORF_seq_similarity	TRUE	Complete ORF gain
uc010ryl.1,uc001pul.2	uc001pul.2	uc010ryl.1	chr11:118868852..118886454,+	CCDC84	BRCA_ctrl	BRCA_cancer	domains_identified	TRUE	Domain gain
uc010ryl.1,uc001pul.2	uc001pul.2	uc010ryl.1	chr11:118868852..118886454,+	CCDC84	KICH_ctrl	KICH_cancer	ORF_seq_similarity	TRUE	Complete ORF gain
uc010ryl.1,uc001pul.2	uc001pul.2	uc010ryl.1	chr11:118868852..118886454,+	CCDC84	KICH_ctrl	KICH_cancer	domains_identified	TRUE	Domain gain
uc001pul.2,uc010ryl.1	uc010ryl.1	uc001pul.2	chr11:118868852..118886454,+	CCDC84	KIRC_ctrl	KIRC_cancer	ORF_seq_similarity	TRUE	Complete ORF loss
uc001pul.2,uc010ryl.1	uc010ryl.1	uc001pul.2	chr11:118868852..118886454,+	CCDC84	KIRC_ctrl	KIRC_cancer	domains_identified	TRUE	Domain loss
uc001pul.2,uc010ryl.1	uc010ryl.1	uc001pul.2	chr11:118868852..118886454,+	CCDC84	LIHC_ctrl	LIHC_cancer	ORF_seq_similarity	TRUE	Complete ORF loss
uc001pul.2,uc010ryl.1	uc010ryl.1	uc001pul.2	chr11:118868852..118886454,+	CCDC84	LIHC_ctrl	LIHC_cancer	domains_identified	TRUE	Domain loss
uc010ryl.1,uc001pul.2	uc001pul.2	uc010ryl.1	chr11:118868852..118886454,+	CCDC84	LUSC_ctrl	LUSC_cancer	ORF_seq_similarity	TRUE	Complete ORF gain
uc010ryl.1,uc001pul.2	uc001pul.2	uc010ryl.1	chr11:118868852..118886454,+	CCDC84	LUSC_ctrl	LUSC_cancer	domains_identified	TRUE	Domain gain
uc001pvz.2,uc001pwa.2	uc001pwa.2	uc001pvz.2	chr11:119056195..119060900,+	PDZD3	COAD_ctrl	COAD_cancer	intron_retention	TRUE	Intron retention gain
uc001pvz.2,uc001pwa.2	uc001pwa.2	uc001pvz.2	chr11:119056195..119060900,+	PDZD3	COAD_ctrl	COAD_cancer	ORF_seq_similarity	TRUE	ORF is shorter
uc001pvz.2,uc001pwa.2	uc001pwa.2	uc001pvz.2	chr11:119056195..119060900,+	PDZD3	COAD_ctrl	COAD_cancer	domains_identified	TRUE	Domain loss
uc001pvz.2,uc001pwb.2	uc001pwb.2	uc001pvz.2	chr11:119056195..119060900,+	PDZD3	COAD_ctrl	COAD_cancer	intron_retention	TRUE	Intron retention gain
uc001pvz.2,uc001pwb.2	uc001pwb.2	uc001pvz.2	chr11:119056195..119060900,+	PDZD3	COAD_ctrl	COAD_cancer	ORF_seq_similarity	TRUE	ORF is longer
uc001pvz.2,uc001pwa.2	uc001pwa.2	uc001pvz.2	chr11:119056195..119060900,+	PDZD3	KIRP_ctrl	KIRP_cancer	intron_retention	TRUE	Intron retention gain
uc001pvz.2,uc001pwa.2	uc001pwa.2	uc001pvz.2	chr11:119056195..119060900,+	PDZD3	KIRP_ctrl	KIRP_cancer	ORF_seq_similarity	TRUE	ORF is shorter
uc001pvz.2,uc001pwa.2	uc001pwa.2	uc001pvz.2	chr11:119056195..119060900,+	PDZD3	KIRP_ctrl	KIRP_cancer	domains_identified	TRUE	Domain loss
uc001pvz.2,uc001pwb.2	uc001pwb.2	uc001pvz.2	chr11:119056195..119060900,+	PDZD3	KIRP_ctrl	KIRP_cancer	intron_retention	TRUE	Intron retention gain
uc001pvz.2,uc001pwb.2	uc001pwb.2	uc001pvz.2	chr11:119056195..119060900,+	PDZD3	KIRP_ctrl	KIRP_cancer	ORF_seq_similarity	TRUE	ORF is longer
uc010rzj.1,uc001pwz.2	uc001pwz.2	uc010rzj.1	chr11:119981995..120008863,-	TRIM29	COAD_ctrl	COAD_cancer	ORF_seq_similarity	TRUE	ORF is longer
uc010rzj.1,uc001pwz.2	uc001pwz.2	uc010rzj.1	chr11:119981995..120008863,-	TRIM29	COAD_ctrl	COAD_cancer	domains_identified	TRUE	Domain gain
uc001pwz.2,uc001pwy.2	uc001pwy.2	uc001pwz.2	chr11:119981995..120008863,-	TRIM29	KIRP_ctrl	KIRP_cancer	ORF_seq_similarity	TRUE	ORF is shorter
uc001pwz.2,uc001pwy.2	uc001pwy.2	uc001pwz.2	chr11:119981995..120008863,-	TRIM29	KIRP_ctrl	KIRP_cancer	domains_identified	TRUE	Domain loss
uc010rzi.1,uc001pwy.2	uc001pwy.2	uc010rzi.1	chr11:119981995..120008863,-	TRIM29	LUAD_ctrl	LUAD_cancer	ORF_seq_similarity	TRUE	ORF is shorter
uc001pwy.2,uc001pwz.2	uc001pwz.2	uc001pwy.2	chr11:119981995..120008863,-	TRIM29	LUSC_ctrl	LUSC_cancer	ORF_seq_similarity	TRUE	ORF is longer
uc001pwy.2,uc001pwz.2	uc001pwz.2	uc001pwy.2	chr11:119981995..120008863,-	TRIM29	LUSC_ctrl	LUSC_cancer	domains_identified	TRUE	Domain gain
uc010rzj.1,uc001pwz.2	uc001pwz.2	uc010rzj.1	chr11:119981995..120008863,-	TRIM29	LUSC_ctrl	LUSC_cancer	ORF_seq_similarity	TRUE	ORF is longer
uc010rzj.1,uc001pwz.2	uc001pwz.2	uc010rzj.1	chr11:119981995..120008863,-	TRIM29	LUSC_ctrl	LUSC_cancer	domains_identified	TRUE	Domain gain
uc001pxc.2,uc001pxe.1	uc001pxe.1	uc001pxc.2	chr11:120110951..120190653,+	POU2F3	LUSC_ctrl	LUSC_cancer	ORF_seq_similarity	TRUE	ORF is shorter
uc001mkc.2,uc010rcj.1	uc010rcj.1	uc001mkc.2	chr11:12115543..12285329,+	MICAL2	KIRP_ctrl	KIRP_cancer	ORF_seq_similarity	TRUE	ORF is shorter
uc001mkc.2,uc010rcj.1	uc010rcj.1	uc001mkc.2	chr11:12115543..12285329,+	MICAL2	KIRP_ctrl	KIRP_cancer	domains_identified	TRUE	Domain loss
uc001mkc.2,uc010rcj.1	uc010rcj.1	uc001mkc.2	chr11:12115543..12285329,+	MICAL2	THCA_ctrl	THCA_cancer	ORF_seq_similarity	TRUE	ORF is shorter
uc001mkc.2,uc010rcj.1	uc010rcj.1	uc001mkc.2	chr11:12115543..12285329,+	MICAL2	THCA_ctrl	THCA_cancer	domains_identified	TRUE	Domain loss
uc001pxu.2,uc001pxt.2	uc001pxt.2	uc001pxu.2	chr11:121163388..121184117,+	SC5DL	LUAD_ctrl	LUAD_cancer	intron_retention	TRUE	Intron retention gain
uc001pxu.2,uc001pxt.2	uc001pxt.2	uc001pxu.2	chr11:121163388..121184117,+	SC5DL	LUAD_ctrl	LUAD_cancer	ORF_seq_similarity	TRUE	ORF is shorter
uc001pxu.2,uc001pxt.2	uc001pxt.2	uc001pxu.2	chr11:121163388..121184117,+	SC5DL	LUAD_ctrl	LUAD_cancer	domains_identified	TRUE	Domain loss
uc001pxu.2,uc001pxt.2	uc001pxt.2	uc001pxu.2	chr11:121163388..121184117,+	SC5DL	LUSC_ctrl	LUSC_cancer	intron_retention	TRUE	Intron retention gain
uc001pxu.2,uc001pxt.2	uc001pxt.2	uc001pxu.2	chr11:121163388..121184117,+	SC5DL	LUSC_ctrl	LUSC_cancer	ORF_seq_similarity	TRUE	ORF is shorter
uc001pxu.2,uc001pxt.2	uc001pxt.2	uc001pxu.2	chr11:121163388..121184117,+	SC5DL	LUSC_ctrl	LUSC_cancer	domains_identified	TRUE	Domain loss
uc001lsz.2,uc009ycs.1	uc009ycs.1	uc001lsz.2	chr11:1213090..1222362,+	MUC5AC	LUSC_ctrl	LUSC_cancer	intron_retention	TRUE	Intron retention gain
uc001pzt.2,uc001pzr.2	uc001pzr.2	uc001pzt.2	chr11:123986111..124017616,+	VWA5A	KICH_ctrl	KICH_cancer	ORF_seq_similarity	TRUE	ORF is shorter
uc001pzt.2,uc001pzr.2	uc001pzr.2	uc001pzt.2	chr11:123986111..124017616,+	VWA5A	LUSC_ctrl	LUSC_cancer	ORF_seq_similarity	TRUE	ORF is shorter
uc001qak.3,uc001qaj.3	uc001qaj.3	uc001qak.3	chr11:124492742..124505821,+	TBRG1	COAD_ctrl	COAD_cancer	ORF_seq_similarity	TRUE	ORF is shorter
uc001qba.1,uc001qay.1	uc001qay.1	uc001qba.1	chr11:124636394..124670299,-	C11orf61	KICH_ctrl	KICH_cancer	ORF_seq_similarity	TRUE	ORF is shorter
uc001qba.1,uc001qay.1	uc001qay.1	uc001qba.1	chr11:124636394..124670299,-	C11orf61	KICH_ctrl	KICH_cancer	domains_identified	TRUE	Domain loss
uc010sau.1,uc001qbp.2	uc001qbp.2	uc010sau.1	chr11:124933013..124960411,+	SLC37A2	HNSC_ctrl	HNSC_cancer	ORF_seq_similarity	TRUE	ORF is shorter
uc010sau.1,uc001qbp.2	uc001qbp.2	uc010sau.1	chr11:124933013..124960411,+	SLC37A2	HNSC_ctrl	HNSC_cancer	domains_identified	TRUE	Domain loss
uc001qbn.2,uc001qbp.2	uc001qbp.2	uc001qbn.2	chr11:124933013..124960411,+	SLC37A2	LUSC_ctrl	LUSC_cancer	ORF_seq_similarity	TRUE	ORF is shorter
uc001qbn.2,uc001qbp.2	uc001qbp.2	uc001qbn.2	chr11:124933013..124960411,+	SLC37A2	LUSC_ctrl	LUSC_cancer	domains_identified	TRUE	Domain loss
uc001qbu.2,uc001qbv.2	uc001qbv.2	uc001qbu.2	chr11:125034559..125303283,+	PKNOX2	THCA_ctrl	THCA_cancer	ORF_seq_similarity	TRUE	ORF is shorter
uc001qdc.3,uc001qdb.3	uc001qdb.3	uc001qdc.3	chr11:125826715..125933187,-	CDON	KIRC_ctrl	KIRC_cancer	ORF_seq_similarity	TRUE	ORF is shorter
uc001qdc.3,uc001qdb.3	uc001qdb.3	uc001qdc.3	chr11:125826715..125933187,-	CDON	KIRC_ctrl	KIRC_cancer	domains_identified	TRUE	Domain loss
uc001qdc.3,uc001qdb.3	uc001qdb.3	uc001qdc.3	chr11:125826715..125933187,-	CDON	KIRC_ctrl	KIRC_cancer	signal_peptide_identified	TRUE	Signal peptide loss
uc001qdc.3,uc001qdb.3	uc001qdb.3	uc001qdc.3	chr11:125826715..125933187,-	CDON	THCA_ctrl	THCA_cancer	ORF_seq_similarity	TRUE	ORF is shorter
uc001qdc.3,uc001qdb.3	uc001qdb.3	uc001qdc.3	chr11:125826715..125933187,-	CDON	THCA_ctrl	THCA_cancer	domains_identified	TRUE	Domain loss
uc001qdc.3,uc001qdb.3	uc001qdb.3	uc001qdc.3	chr11:125826715..125933187,-	CDON	THCA_ctrl	THCA_cancer	signal_peptide_identified	TRUE	Signal peptide loss
uc001qds.2,uc001qdz.2	uc001qdz.2	uc001qds.2	chr11:126225579..126310752,+	ST3GAL4	KIRP_ctrl	KIRP_cancer	ORF_seq_similarity	TRUE	ORF is shorter
uc001qds.2,uc001qdz.2	uc001qdz.2	uc001qds.2	chr11:126225579..126310752,+	ST3GAL4	KIRP_ctrl	KIRP_cancer	signal_peptide_identified	TRUE	Signal peptide loss
uc010sbs.1,uc009zch.2	uc009zch.2	uc010sbs.1	chr11:128328656..128457453,-	ETS1	KICH_ctrl	KICH_cancer	ORF_seq_similarity	TRUE	ORF is shorter
uc010sbs.1,uc009zch.2	uc009zch.2	uc010sbs.1	chr11:128328656..128457453,-	ETS1	KICH_ctrl	KICH_cancer	domains_identified	TRUE	Domain loss
uc010sbs.1,uc009zch.2	uc009zch.2	uc010sbs.1	chr11:128328656..128457453,-	ETS1	KIRC_ctrl	KIRC_cancer	ORF_seq_similarity	TRUE	ORF is shorter
uc010sbs.1,uc009zch.2	uc009zch.2	uc010sbs.1	chr11:128328656..128457453,-	ETS1	KIRC_ctrl	KIRC_cancer	domains_identified	TRUE	Domain loss
uc010sbs.1,uc009zch.2	uc009zch.2	uc010sbs.1	chr11:128328656..128457453,-	ETS1	LIHC_ctrl	LIHC_cancer	ORF_seq_similarity	TRUE	ORF is shorter
uc010sbs.1,uc009zch.2	uc009zch.2	uc010sbs.1	chr11:128328656..128457453,-	ETS1	LIHC_ctrl	LIHC_cancer	domains_identified	TRUE	Domain loss
uc010sbs.1,uc009zch.2	uc009zch.2	uc010sbs.1	chr11:128328656..128457453,-	ETS1	THCA_ctrl	THCA_cancer	ORF_seq_similarity	TRUE	ORF is shorter
uc010sbs.1,uc009zch.2	uc009zch.2	uc010sbs.1	chr11:128328656..128457453,-	ETS1	THCA_ctrl	THCA_cancer	domains_identified	TRUE	Domain loss
uc009zcp.2,uc001qez.2	uc001qez.2	uc009zcp.2	chr11:128834956..129062093,-	ARHGAP32	BRCA_ctrl	BRCA_cancer	ORF_seq_similarity	TRUE	ORF is shorter
uc009zcp.2,uc001qez.2	uc001qez.2	uc009zcp.2	chr11:128834956..129062093,-	ARHGAP32	BRCA_ctrl	BRCA_cancer	domains_identified	TRUE	Domain loss
uc001qfp.2,uc001qfq.2	uc001qfq.2	uc001qfp.2	chr11:129939716..130014705,+	APLP2	LUAD_ctrl	LUAD_cancer	domains_identified	TRUE	Domain loss
uc001qfp.2,uc001qfq.2	uc001qfq.2	uc001qfp.2	chr11:129939716..130014705,+	APLP2	LUSC_ctrl	LUSC_cancer	domains_identified	TRUE	Domain loss
uc010sci.1,uc001qgr.2	uc001qgr.2	uc010sci.1	chr11:131240371..132206715,+	NTM	BRCA_ctrl	BRCA_cancer	coding_potential	TRUE	Transcript is Noncoding
uc010sci.1,uc001qgr.2	uc001qgr.2	uc010sci.1	chr11:131240371..132206715,+	NTM	BRCA_ctrl	BRCA_cancer	ORF_seq_similarity	TRUE	ORF is shorter
uc010sci.1,uc001qgr.2	uc001qgr.2	uc010sci.1	chr11:131240371..132206715,+	NTM	BRCA_ctrl	BRCA_cancer	domains_identified	TRUE	Domain loss
uc010sci.1,uc001qgr.2	uc001qgr.2	uc010sci.1	chr11:131240371..132206715,+	NTM	BRCA_ctrl	BRCA_cancer	signal_peptide_identified	TRUE	Signal peptide loss
uc010sci.1,uc001qgr.2	uc001qgr.2	uc010sci.1	chr11:131240371..132206715,+	NTM	LUSC_ctrl	LUSC_cancer	coding_potential	TRUE	Transcript is Noncoding
uc010sci.1,uc001qgr.2	uc001qgr.2	uc010sci.1	chr11:131240371..132206715,+	NTM	LUSC_ctrl	LUSC_cancer	ORF_seq_similarity	TRUE	ORF is shorter
uc010sci.1,uc001qgr.2	uc001qgr.2	uc010sci.1	chr11:131240371..132206715,+	NTM	LUSC_ctrl	LUSC_cancer	domains_identified	TRUE	Domain loss
uc010sci.1,uc001qgr.2	uc001qgr.2	uc010sci.1	chr11:131240371..132206715,+	NTM	LUSC_ctrl	LUSC_cancer	signal_peptide_identified	TRUE	Signal peptide loss
uc001qhb.1,uc009zcz.1	uc009zcz.1	uc001qhb.1	chr11:133938820..134021649,+	JAM3	PRAD_ctrl	PRAD_cancer	ORF_seq_similarity	TRUE	ORF is shorter
uc001qhb.1,uc009zcz.1	uc009zcz.1	uc001qhb.1	chr11:133938820..134021649,+	JAM3	PRAD_ctrl	PRAD_cancer	domains_identified	TRUE	Domain loss
uc001qhd.1,uc001qhc.1	uc001qhc.1	uc001qhd.1	chr11:134022337..134094471,-	NCAPD3	THCA_ctrl	THCA_cancer	ORF_seq_similarity	TRUE	ORF is shorter
uc001qhd.1,uc001qhc.1	uc001qhc.1	uc001qhd.1	chr11:134022337..134094471,-	NCAPD3	THCA_ctrl	THCA_cancer	domains_identified	TRUE	Domain loss
uc001mkz.2,uc010rcm.1	uc010rcm.1	uc001mkz.2	chr11:13409557..13484838,-	BTBD10	KICH_ctrl	KICH_cancer	ORF_seq_similarity	TRUE	ORF is shorter
uc001mkz.2,uc010rcm.1	uc010rcm.1	uc001mkz.2	chr11:13409557..13484838,-	BTBD10	KIRP_ctrl	KIRP_cancer	ORF_seq_similarity	TRUE	ORF is shorter
uc001mkz.2,uc010rcm.1	uc010rcm.1	uc001mkz.2	chr11:13409557..13484838,-	BTBD10	STAD_ctrl	STAD_cancer	ORF_seq_similarity	TRUE	ORF is shorter
uc001qhk.2,uc001qhl.2	uc001qhl.2	uc001qhk.2	chr11:134123434..134135744,+	ACAD8	KIRP_ctrl	KIRP_cancer	ORF_seq_similarity	TRUE	ORF is shorter
uc001qhk.2,uc001qhl.2	uc001qhl.2	uc001qhk.2	chr11:134123434..134135744,+	ACAD8	KIRP_ctrl	KIRP_cancer	domains_identified	TRUE	Domain loss
uc001ltq.1,uc010qwy.1	uc010qwy.1	uc001ltq.1	chr11:1490693..1507976,-	MOB2	HNSC_ctrl	HNSC_cancer	ORF_seq_similarity	TRUE	ORF is shorter
uc010qwy.1,uc001ltq.1	uc001ltq.1	uc010qwy.1	chr11:1490693..1507976,-	MOB2	LUAD_ctrl	LUAD_cancer	ORF_seq_similarity	TRUE	ORF is longer
uc010qwz.1,uc001ltq.1	uc001ltq.1	uc010qwz.1	chr11:1490693..1507976,-	MOB2	PRAD_ctrl	PRAD_cancer	ORF_seq_similarity	TRUE	ORF is shorter
uc010qwz.1,uc001ltq.1	uc001ltq.1	uc010qwz.1	chr11:1490693..1507976,-	MOB2	STAD_ctrl	STAD_cancer	ORF_seq_similarity	TRUE	ORF is shorter
uc010rcu.1,uc001mmm.2	uc001mmm.2	uc010rcu.1	chr11:16800548..17035963,-	PLEKHA7	HNSC_ctrl	HNSC_cancer	ORF_seq_similarity	TRUE	ORF is shorter
uc010rcu.1,uc001mmm.2	uc001mmm.2	uc010rcu.1	chr11:16800548..17035963,-	PLEKHA7	HNSC_ctrl	HNSC_cancer	domains_identified	TRUE	Domain loss
uc001mmq.3,uc010rcw.1	uc010rcw.1	uc001mmq.3	chr11:17099277..17229530,-	PIK3C2A	STAD_ctrl	STAD_cancer	ORF_seq_similarity	TRUE	ORF is shorter
uc001mmq.3,uc010rcw.1	uc010rcw.1	uc001mmq.3	chr11:17099277..17229530,-	PIK3C2A	STAD_ctrl	STAD_cancer	domains_identified	TRUE	Domain gain
uc001mmq.3,uc010rcw.1	uc010rcw.1	uc001mmq.3	chr11:17099277..17229530,-	PIK3C2A	THCA_ctrl	THCA_cancer	ORF_seq_similarity	TRUE	ORF is shorter
uc001mmq.3,uc010rcw.1	uc010rcw.1	uc001mmq.3	chr11:17099277..17229530,-	PIK3C2A	THCA_ctrl	THCA_cancer	domains_identified	TRUE	Domain gain
uc001mod.1,uc001mof.1	uc001mof.1	uc001mod.1	chr11:18300217..18343721,-	HPS5	KICH_ctrl	KICH_cancer	ORF_seq_similarity	TRUE	ORF is shorter
uc001mod.1,uc001mof.1	uc001mof.1	uc001mod.1	chr11:18300217..18343721,-	HPS5	KIRC_ctrl	KIRC_cancer	ORF_seq_similarity	TRUE	ORF is shorter
uc001mod.1,uc001mof.1	uc001mof.1	uc001mod.1	chr11:18300217..18343721,-	HPS5	STAD_ctrl	STAD_cancer	ORF_seq_similarity	TRUE	ORF is shorter
uc001mod.1,uc001mof.1	uc001mof.1	uc001mod.1	chr11:18300217..18343721,-	HPS5	THCA_ctrl	THCA_cancer	ORF_seq_similarity	TRUE	ORF is shorter
uc001luk.2,uc001lui.2	uc001lui.2	uc001luk.2	chr11:1874200..1913492,+	LSP1	BRCA_ctrl	BRCA_cancer	ORF_seq_similarity	TRUE	ORF is longer
uc001lum.2,uc001lui.2	uc001lui.2	uc001lum.2	chr11:1874200..1913492,+	LSP1	BRCA_ctrl	BRCA_cancer	ORF_seq_similarity	TRUE	ORF is longer
uc001lum.2,uc001lui.2	uc001lui.2	uc001lum.2	chr11:1874200..1913492,+	LSP1	HNSC_ctrl	HNSC_cancer	ORF_seq_similarity	TRUE	ORF is longer
uc001luk.2,uc001lui.2	uc001lui.2	uc001luk.2	chr11:1874200..1913492,+	LSP1	THCA_ctrl	THCA_cancer	ORF_seq_similarity	TRUE	ORF is longer
uc001mpi.2,uc001mpj.2	uc001mpj.2	uc001mpi.2	chr11:19138692..19197966,+	ZDHHC13	KIRP_ctrl	KIRP_cancer	ORF_seq_similarity	TRUE	ORF is shorter
uc001lok.3,uc010qvl.1	uc010qvl.1	uc001lok.3	chr11:214625..236931,-	SIRT3	LIHC_ctrl	LIHC_cancer	coding_potential	TRUE	Transcript is Noncoding
uc001lok.3,uc010qvl.1	uc010qvl.1	uc001lok.3	chr11:214625..236931,-	SIRT3	LIHC_ctrl	LIHC_cancer	ORF_seq_similarity	TRUE	Complete ORF loss
uc001lok.3,uc010qvl.1	uc010qvl.1	uc001lok.3	chr11:214625..236931,-	SIRT3	LIHC_ctrl	LIHC_cancer	domains_identified	TRUE	Domain loss
uc001lok.3,uc010qvl.1	uc010qvl.1	uc001lok.3	chr11:214625..236931,-	SIRT3	LIHC_ctrl	LIHC_cancer	signal_peptide_identified	TRUE	Signal peptide loss
uc001lok.3,uc010qvl.1	uc010qvl.1	uc001lok.3	chr11:214625..236931,-	SIRT3	STAD_ctrl	STAD_cancer	coding_potential	TRUE	Transcript is Noncoding
uc001lok.3,uc010qvl.1	uc010qvl.1	uc001lok.3	chr11:214625..236931,-	SIRT3	STAD_ctrl	STAD_cancer	ORF_seq_similarity	TRUE	Complete ORF loss
uc001lok.3,uc010qvl.1	uc010qvl.1	uc001lok.3	chr11:214625..236931,-	SIRT3	STAD_ctrl	STAD_cancer	domains_identified	TRUE	Domain loss
uc001lok.3,uc010qvl.1	uc010qvl.1	uc001lok.3	chr11:214625..236931,-	SIRT3	STAD_ctrl	STAD_cancer	signal_peptide_identified	TRUE	Signal peptide loss
uc009yde.2,uc001lvf.2	uc001lvf.2	uc009yde.2	chr11:2150348..2170833,-	IGF2	COAD_ctrl	COAD_cancer	coding_potential	TRUE	Transcript is Noncoding
uc009yde.2,uc001lvf.2	uc001lvf.2	uc009yde.2	chr11:2150348..2170833,-	IGF2	COAD_ctrl	COAD_cancer	ORF_seq_similarity	TRUE	Complete ORF loss
uc009yde.2,uc001lvf.2	uc001lvf.2	uc009yde.2	chr11:2150348..2170833,-	IGF2	COAD_ctrl	COAD_cancer	domains_identified	TRUE	Domain loss
uc009yde.2,uc001lvf.2	uc001lvf.2	uc009yde.2	chr11:2150348..2170833,-	IGF2	COAD_ctrl	COAD_cancer	signal_peptide_identified	TRUE	Signal peptide loss
uc009yig.2,uc009yif.2	uc009yif.2	uc009yig.2	chr11:24518556..25104182,+	LUZP2	PRAD_ctrl	PRAD_cancer	ORF_seq_similarity	TRUE	ORF is shorter
uc009yig.2,uc009yif.2	uc009yif.2	uc009yig.2	chr11:24518556..25104182,+	LUZP2	PRAD_ctrl	PRAD_cancer	domains_identified	TRUE	Domain loss
uc009yig.2,uc009yif.2	uc009yif.2	uc009yig.2	chr11:24518556..25104182,+	LUZP2	PRAD_ctrl	PRAD_cancer	signal_peptide_identified	TRUE	Signal peptide loss
uc001lwn.2,uc001lwo.2	uc001lwo.2	uc001lwn.2	chr11:2466221..2870339,+	KCNQ1	KIRP_ctrl	KIRP_cancer	ORF_seq_similarity	TRUE	ORF is shorter
uc001lwn.2,uc001lwo.2	uc001lwo.2	uc001lwn.2	chr11:2466221..2870339,+	KCNQ1	KIRP_ctrl	KIRP_cancer	signal_peptide_identified	TRUE	Signal peptide gain
uc001mqw.2,uc001mqy.2	uc001mqy.2	uc001mqw.2	chr11:26580580..26593815,-	MUC15	BRCA_ctrl	BRCA_cancer	ORF_seq_similarity	TRUE	ORF is shorter
uc001mra.2,uc001mrb.2	uc001mrb.2	uc001mra.2	chr11:26688566..26744974,-	SLC5A12	KIRP_ctrl	KIRP_cancer	ORF_seq_similarity	TRUE	Complete ORF loss
uc001mra.2,uc001mrb.2	uc001mrb.2	uc001mra.2	chr11:26688566..26744974,-	SLC5A12	KIRP_ctrl	KIRP_cancer	domains_identified	TRUE	Domain loss
uc001mrj.3,uc001mrk.3	uc001mrk.3	uc001mrj.3	chr11:27387510..27494334,-	LGR4	BRCA_ctrl	BRCA_cancer	domains_identified	TRUE	Domain switch
uc001mrj.3,uc001mrk.3	uc001mrk.3	uc001mrj.3	chr11:27387510..27494334,-	LGR4	KIRC_ctrl	KIRC_cancer	domains_identified	TRUE	Domain switch
uc001mrj.3,uc001mrk.3	uc001mrk.3	uc001mrj.3	chr11:27387510..27494334,-	LGR4	KIRP_ctrl	KIRP_cancer	domains_identified	TRUE	Domain switch
uc001mrk.3,uc001mrj.3	uc001mrj.3	uc001mrk.3	chr11:27387510..27494334,-	LGR4	LUAD_ctrl	LUAD_cancer	domains_identified	TRUE	Domain switch
uc001mrk.3,uc001mrj.3	uc001mrj.3	uc001mrk.3	chr11:27387510..27494334,-	LGR4	LUSC_ctrl	LUSC_cancer	domains_identified	TRUE	Domain switch
uc001mrj.3,uc001mrk.3	uc001mrk.3	uc001mrj.3	chr11:27387510..27494334,-	LGR4	THCA_ctrl	THCA_cancer	domains_identified	TRUE	Domain switch
uc001mrl.2,uc009yii.2	uc009yii.2	uc001mrl.2	chr11:27515971..27528326,-	LIN7C	THCA_ctrl	THCA_cancer	ORF_seq_similarity	TRUE	ORF is shorter
uc001lwy.2,uc001lwz.2	uc001lwz.2	uc001lwy.2	chr11:2920951..2946475,+	SLC22A18	LUAD_ctrl	LUAD_cancer	ORF_seq_similarity	TRUE	ORF is shorter
uc009yji.2,uc001msr.2	uc001msr.2	uc009yji.2	chr11:30406040..30607930,-	MPPED2	KIRC_ctrl	KIRC_cancer	ORF_seq_similarity	TRUE	ORF is longer
uc009yji.2,uc001msr.2	uc001msr.2	uc009yji.2	chr11:30406040..30607930,-	MPPED2	KIRC_ctrl	KIRC_cancer	domains_identified	TRUE	Domain gain
uc001lxk.2,uc010qxq.1	uc010qxq.1	uc001lxk.2	chr11:3108346..3187969,-	OSBPL5	COAD_ctrl	COAD_cancer	ORF_seq_similarity	TRUE	ORF is shorter
uc001lxk.2,uc010qxq.1	uc010qxq.1	uc001lxk.2	chr11:3108346..3187969,-	OSBPL5	COAD_ctrl	COAD_cancer	domains_identified	TRUE	Domain loss
uc001lxk.2,uc010qxq.1	uc010qxq.1	uc001lxk.2	chr11:3108346..3187969,-	OSBPL5	PRAD_ctrl	PRAD_cancer	ORF_seq_similarity	TRUE	ORF is shorter
uc001lxk.2,uc010qxq.1	uc010qxq.1	uc001lxk.2	chr11:3108346..3187969,-	OSBPL5	PRAD_ctrl	PRAD_cancer	domains_identified	TRUE	Domain loss
uc001msx.2,uc009yjn.1	uc009yjn.1	uc001msx.2	chr11:31391377..31454381,+	DNAJC24	THCA_ctrl	THCA_cancer	intron_retention	TRUE	Intron retention loss
uc001msx.2,uc009yjn.1	uc009yjn.1	uc001msx.2	chr11:31391377..31454381,+	DNAJC24	THCA_ctrl	THCA_cancer	coding_potential	TRUE	Transcript is Noncoding
uc001msx.2,uc009yjn.1	uc009yjn.1	uc001msx.2	chr11:31391377..31454381,+	DNAJC24	THCA_ctrl	THCA_cancer	ORF_seq_similarity	TRUE	Complete ORF loss
uc001msx.2,uc009yjn.1	uc009yjn.1	uc001msx.2	chr11:31391377..31454381,+	DNAJC24	THCA_ctrl	THCA_cancer	domains_identified	TRUE	Domain loss
uc001mtl.1,uc001mtm.1	uc001mtm.1	uc001mtl.1	chr11:32409325..32457087,-	WT1	KIRC_ctrl	KIRC_cancer	domains_identified	TRUE	Domain switch
uc001mtn.1,uc001mtm.1	uc001mtm.1	uc001mtn.1	chr11:32409325..32457087,-	WT1	KIRC_ctrl	KIRC_cancer	ORF_seq_similarity	TRUE	ORF is shorter
uc001mui.2,uc001muh.2	uc001muh.2	uc001mui.2	chr11:33106135..33183037,-	CSTF3	KIRC_ctrl	KIRC_cancer	coding_potential	TRUE	Transcript is coding
uc001mui.2,uc001muh.2	uc001muh.2	uc001mui.2	chr11:33106135..33183037,-	CSTF3	KIRC_ctrl	KIRC_cancer	ORF_seq_similarity	TRUE	ORF is longer
uc001mui.2,uc001muh.2	uc001muh.2	uc001mui.2	chr11:33106135..33183037,-	CSTF3	KIRC_ctrl	KIRC_cancer	domains_identified	TRUE	Domain gain
uc001muz.2,uc010rej.1	uc010rej.1	uc001muz.2	chr11:33762492..33796071,-	FBXO3	KICH_ctrl	KICH_cancer	ORF_seq_similarity	TRUE	ORF is shorter
uc001muz.2,uc010rej.1	uc010rej.1	uc001muz.2	chr11:33762492..33796071,-	FBXO3	KICH_ctrl	KICH_cancer	domains_identified	TRUE	Domain loss
uc001muz.2,uc010rej.1	uc010rej.1	uc001muz.2	chr11:33762492..33796071,-	FBXO3	KIRP_ctrl	KIRP_cancer	ORF_seq_similarity	TRUE	ORF is shorter
uc001muz.2,uc010rej.1	uc010rej.1	uc001muz.2	chr11:33762492..33796071,-	FBXO3	KIRP_ctrl	KIRP_cancer	domains_identified	TRUE	Domain loss
uc001muz.2,uc001mva.1	uc001mva.1	uc001muz.2	chr11:33762492..33796071,-	FBXO3	LUSC_ctrl	LUSC_cancer	ORF_seq_similarity	TRUE	ORF is shorter
uc001muz.2,uc010rej.1	uc010rej.1	uc001muz.2	chr11:33762492..33796071,-	FBXO3	THCA_ctrl	THCA_cancer	ORF_seq_similarity	TRUE	ORF is shorter
uc001muz.2,uc010rej.1	uc010rej.1	uc001muz.2	chr11:33762492..33796071,-	FBXO3	THCA_ctrl	THCA_cancer	domains_identified	TRUE	Domain loss
uc001mvm.2,uc001mvn.2	uc001mvn.2	uc001mvm.2	chr11:34460478..34493603,+	CAT	KIRP_ctrl	KIRP_cancer	ORF_seq_similarity	TRUE	ORF is shorter
uc001mvm.2,uc001mvn.2	uc001mvn.2	uc001mvm.2	chr11:34460478..34493603,+	CAT	KIRP_ctrl	KIRP_cancer	domains_identified	TRUE	Domain loss
uc001mvp.1,uc009ykd.1	uc009ykd.1	uc001mvp.1	chr11:34500342..34535330,-	ELF5	BRCA_ctrl	BRCA_cancer	ORF_seq_similarity	TRUE	ORF is shorter
uc001mvp.1,uc009ykd.1	uc009ykd.1	uc001mvp.1	chr11:34500342..34535330,-	ELF5	BRCA_ctrl	BRCA_cancer	domains_identified	TRUE	Domain loss
uc001mvx.2,uc001mvv.2	uc001mvv.2	uc001mvx.2	chr11:35160417..35253946,+	CD44	BRCA_ctrl	BRCA_cancer	ORF_seq_similarity	TRUE	ORF is longer
uc001mvx.2,uc001mvw.2	uc001mvw.2	uc001mvx.2	chr11:35160417..35253946,+	CD44	COAD_ctrl	COAD_cancer	ORF_seq_similarity	TRUE	ORF is longer
uc001mvx.2,uc001mvw.2	uc001mvw.2	uc001mvx.2	chr11:35160417..35253946,+	CD44	KICH_ctrl	KICH_cancer	ORF_seq_similarity	TRUE	ORF is longer
uc001mvx.2,uc001mvw.2	uc001mvw.2	uc001mvx.2	chr11:35160417..35253946,+	CD44	LUAD_ctrl	LUAD_cancer	ORF_seq_similarity	TRUE	ORF is longer
uc001mvx.2,uc001mvv.2	uc001mvv.2	uc001mvx.2	chr11:35160417..35253946,+	CD44	LUSC_ctrl	LUSC_cancer	ORF_seq_similarity	TRUE	ORF is longer
uc001mvx.2,uc001mvw.2	uc001mvw.2	uc001mvx.2	chr11:35160417..35253946,+	CD44	STAD_ctrl	STAD_cancer	ORF_seq_similarity	TRUE	ORF is longer
uc001mvx.2,uc001mvw.2	uc001mvw.2	uc001mvx.2	chr11:35160417..35253946,+	CD44	THCA_ctrl	THCA_cancer	ORF_seq_similarity	TRUE	ORF is longer
uc001mwf.2,uc010rew.1	uc010rew.1	uc001mwf.2	chr11:35453378..35551848,-	PAMR1	BRCA_ctrl	BRCA_cancer	intron_retention	TRUE	Intron retention gain
uc001mwf.2,uc010rew.1	uc010rew.1	uc001mwf.2	chr11:35453378..35551848,-	PAMR1	BRCA_ctrl	BRCA_cancer	ORF_seq_similarity	TRUE	ORF is shorter
uc001mwf.2,uc010rew.1	uc010rew.1	uc001mwf.2	chr11:35453378..35551848,-	PAMR1	BRCA_ctrl	BRCA_cancer	NMD_status	TRUE	NMD insensitive
uc001mwf.2,uc010rew.1	uc010rew.1	uc001mwf.2	chr11:35453378..35551848,-	PAMR1	BRCA_ctrl	BRCA_cancer	domains_identified	TRUE	Domain loss
uc001lyh.2,uc001lyg.2	uc001lyg.2	uc001lyh.2	chr11:3696241..3818892,-	NUP98	KIRC_ctrl	KIRC_cancer	ORF_seq_similarity	TRUE	ORF is shorter
uc001lyh.2,uc001lyg.2	uc001lyg.2	uc001lyh.2	chr11:3696241..3818892,-	NUP98	KIRC_ctrl	KIRC_cancer	domains_identified	TRUE	Domain loss
uc001lyh.2,uc001lyg.2	uc001lyg.2	uc001lyh.2	chr11:3696241..3818892,-	NUP98	KIRP_ctrl	KIRP_cancer	ORF_seq_similarity	TRUE	ORF is shorter
uc001lyh.2,uc001lyg.2	uc001lyg.2	uc001lyh.2	chr11:3696241..3818892,-	NUP98	KIRP_ctrl	KIRP_cancer	domains_identified	TRUE	Domain loss
uc001lyh.2,uc001lyg.2	uc001lyg.2	uc001lyh.2	chr11:3696241..3818892,-	NUP98	THCA_ctrl	THCA_cancer	ORF_seq_similarity	TRUE	ORF is shorter
uc001lyh.2,uc001lyg.2	uc001lyg.2	uc001lyh.2	chr11:3696241..3818892,-	NUP98	THCA_ctrl	THCA_cancer	domains_identified	TRUE	Domain loss
uc001lyv.2,uc009yeg.2	uc009yeg.2	uc001lyv.2	chr11:3876933..4114440,+	STIM1	KIRP_ctrl	KIRP_cancer	ORF_seq_similarity	TRUE	ORF is shorter
uc001lyv.2,uc009yeg.2	uc009yeg.2	uc001lyv.2	chr11:3876933..4114440,+	STIM1	KIRP_ctrl	KIRP_cancer	domains_identified	TRUE	Domain loss
uc001lyv.2,uc009yeg.2	uc009yeg.2	uc001lyv.2	chr11:3876933..4114440,+	STIM1	KIRP_ctrl	KIRP_cancer	signal_peptide_identified	TRUE	Signal peptide loss
uc001lyv.2,uc009yeg.2	uc009yeg.2	uc001lyv.2	chr11:3876933..4114440,+	STIM1	THCA_ctrl	THCA_cancer	ORF_seq_similarity	TRUE	ORF is shorter
uc001lyv.2,uc009yeg.2	uc009yeg.2	uc001lyv.2	chr11:3876933..4114440,+	STIM1	THCA_ctrl	THCA_cancer	domains_identified	TRUE	Domain loss
uc001lyv.2,uc009yeg.2	uc009yeg.2	uc001lyv.2	chr11:3876933..4114440,+	STIM1	THCA_ctrl	THCA_cancer	signal_peptide_identified	TRUE	Signal peptide loss
uc001lpi.2,uc001lph.2	uc001lph.2	uc001lpi.2	chr11:417930..442011,-	ANO9	COAD_ctrl	COAD_cancer	ORF_seq_similarity	TRUE	ORF is shorter
uc010rfj.1,uc001mxh.2	uc001mxh.2	uc010rfj.1	chr11:43380491..43515493,+	TTC17	LUSC_ctrl	LUSC_cancer	ORF_seq_similarity	TRUE	ORF is shorter
uc010rfj.1,uc001mxh.2	uc001mxh.2	uc010rfj.1	chr11:43380491..43515493,+	TTC17	LUSC_ctrl	LUSC_cancer	domains_identified	TRUE	Domain loss
uc001mxx.2,uc010rfm.1	uc010rfm.1	uc001mxx.2	chr11:44087475..44105569,+	ACCS	KIRC_ctrl	KIRC_cancer	intron_retention	TRUE	Intron retention gain
uc001mxx.2,uc010rfm.1	uc010rfm.1	uc001mxx.2	chr11:44087475..44105569,+	ACCS	KIRC_ctrl	KIRC_cancer	ORF_seq_similarity	TRUE	ORF is shorter
uc010rgn.1,uc010rgo.1	uc010rgo.1	uc010rgn.1	chr11:45868669..45904797,+	CRY2	KICH_ctrl	KICH_cancer	ORF_seq_similarity	TRUE	ORF is shorter
uc010rgn.1,uc010rgo.1	uc010rgo.1	uc010rgn.1	chr11:45868669..45904797,+	CRY2	KICH_ctrl	KICH_cancer	domains_identified	TRUE	Domain loss
uc010rgn.1,uc010rgo.1	uc010rgo.1	uc010rgn.1	chr11:45868669..45904797,+	CRY2	KICH_ctrl	KICH_cancer	signal_peptide_identified	TRUE	Signal peptide loss
uc001nbw.1,uc001nby.1	uc001nby.1	uc001nbw.1	chr11:45943196..45950647,+	GYLTL1B	KIRC_ctrl	KIRC_cancer	ORF_seq_similarity	TRUE	ORF is shorter
uc001nbw.1,uc001nby.1	uc001nby.1	uc001nbw.1	chr11:45943196..45950647,+	GYLTL1B	KIRC_ctrl	KIRC_cancer	domains_identified	TRUE	Domain loss
uc001nbw.1,uc001nby.1	uc001nby.1	uc001nbw.1	chr11:45943196..45950647,+	GYLTL1B	KIRC_ctrl	KIRC_cancer	signal_peptide_identified	TRUE	Signal peptide loss
uc001nbw.1,uc001nby.1	uc001nby.1	uc001nbw.1	chr11:45943196..45950647,+	GYLTL1B	KIRP_ctrl	KIRP_cancer	ORF_seq_similarity	TRUE	ORF is shorter
uc001nbw.1,uc001nby.1	uc001nby.1	uc001nbw.1	chr11:45943196..45950647,+	GYLTL1B	KIRP_ctrl	KIRP_cancer	domains_identified	TRUE	Domain loss
uc001nbw.1,uc001nby.1	uc001nby.1	uc001nbw.1	chr11:45943196..45950647,+	GYLTL1B	KIRP_ctrl	KIRP_cancer	signal_peptide_identified	TRUE	Signal peptide loss
uc001lzf.1,uc010qyj.1	uc010qyj.1	uc001lzf.1	chr11:4619902..4629437,-	TRIM68	KIRC_ctrl	KIRC_cancer	coding_potential	TRUE	Transcript is Noncoding
uc001lzf.1,uc010qyj.1	uc010qyj.1	uc001lzf.1	chr11:4619902..4629437,-	TRIM68	KIRC_ctrl	KIRC_cancer	ORF_seq_similarity	TRUE	Complete ORF loss
uc001lzf.1,uc010qyj.1	uc010qyj.1	uc001lzf.1	chr11:4619902..4629437,-	TRIM68	KIRC_ctrl	KIRC_cancer	domains_identified	TRUE	Domain loss
uc001lzf.1,uc010qyj.1	uc010qyj.1	uc001lzf.1	chr11:4619902..4629437,-	TRIM68	KIRP_ctrl	KIRP_cancer	coding_potential	TRUE	Transcript is Noncoding
uc001lzf.1,uc010qyj.1	uc010qyj.1	uc001lzf.1	chr11:4619902..4629437,-	TRIM68	KIRP_ctrl	KIRP_cancer	ORF_seq_similarity	TRUE	Complete ORF loss
uc001lzf.1,uc010qyj.1	uc010qyj.1	uc001lzf.1	chr11:4619902..4629437,-	TRIM68	KIRP_ctrl	KIRP_cancer	domains_identified	TRUE	Domain loss
uc001ncf.2,uc001ncg.2	uc001ncg.2	uc001ncf.2	chr11:46299228..46342970,+	CREB3L1	KICH_ctrl	KICH_cancer	ORF_seq_similarity	TRUE	ORF is shorter
uc001ncf.2,uc001ncg.2	uc001ncg.2	uc001ncf.2	chr11:46299228..46342970,+	CREB3L1	KICH_ctrl	KICH_cancer	domains_identified	TRUE	Domain loss
uc001ncf.2,uc001ncg.2	uc001ncg.2	uc001ncf.2	chr11:46299228..46342970,+	CREB3L1	KICH_ctrl	KICH_cancer	signal_peptide_identified	TRUE	Signal peptide gain
uc001ndi.1,uc001ndh.1	uc001ndh.1	uc001ndi.1	chr11:46765084..46867843,-	CKAP5	THCA_ctrl	THCA_cancer	ORF_seq_similarity	TRUE	ORF is shorter
uc001ndi.1,uc001ndh.1	uc001ndh.1	uc001ndi.1	chr11:46765084..46867843,-	CKAP5	THCA_ctrl	THCA_cancer	domains_identified	TRUE	Domain loss
uc001ndn.3,uc001ndm.3	uc001ndm.3	uc001ndn.3	chr11:46878419..46940076,-	LRP4	STAD_ctrl	STAD_cancer	ORF_seq_similarity	TRUE	ORF is shorter
uc001ndn.3,uc001ndm.3	uc001ndm.3	uc001ndn.3	chr11:46878419..46940076,-	LRP4	STAD_ctrl	STAD_cancer	domains_identified	TRUE	Domain loss
uc001ndn.3,uc001ndm.3	uc001ndm.3	uc001ndn.3	chr11:46878419..46940076,-	LRP4	STAD_ctrl	STAD_cancer	signal_peptide_identified	TRUE	Signal peptide loss
uc001ndt.2,uc010rha.1	uc010rha.1	uc001ndt.2	chr11:47185854..47198419,-	ARFGAP2	KICH_ctrl	KICH_cancer	ORF_seq_similarity	TRUE	ORF is shorter
uc001ndt.2,uc010rha.1	uc010rha.1	uc001ndt.2	chr11:47185854..47198419,-	ARFGAP2	KICH_ctrl	KICH_cancer	domains_identified	TRUE	Domain loss
uc001ndt.2,uc010rha.1	uc010rha.1	uc001ndt.2	chr11:47185854..47198419,-	ARFGAP2	STAD_ctrl	STAD_cancer	ORF_seq_similarity	TRUE	ORF is shorter
uc001ndt.2,uc010rha.1	uc010rha.1	uc001ndt.2	chr11:47185854..47198419,-	ARFGAP2	STAD_ctrl	STAD_cancer	domains_identified	TRUE	Domain loss
uc009ylm.2,uc001nek.2	uc001nek.2	uc009ylm.2	chr11:47269851..47290400,+	NR1H3	BRCA_ctrl	BRCA_cancer	ORF_seq_similarity	TRUE	ORF is shorter
uc009ylm.2,uc001nek.2	uc001nek.2	uc009ylm.2	chr11:47269851..47290400,+	NR1H3	KICH_ctrl	KICH_cancer	ORF_seq_similarity	TRUE	ORF is shorter
uc001nek.2,uc009ylm.2	uc009ylm.2	uc001nek.2	chr11:47269851..47290400,+	NR1H3	KIRC_ctrl	KIRC_cancer	ORF_seq_similarity	TRUE	ORF is longer
uc009ylm.2,uc001nek.2	uc001nek.2	uc009ylm.2	chr11:47269851..47290400,+	NR1H3	LUAD_ctrl	LUAD_cancer	ORF_seq_similarity	TRUE	ORF is shorter
uc009ylm.2,uc001nek.2	uc001nek.2	uc009ylm.2	chr11:47269851..47290400,+	NR1H3	LUSC_ctrl	LUSC_cancer	ORF_seq_similarity	TRUE	ORF is shorter
uc001ngy.2,uc001ngx.2	uc001ngx.2	uc001ngy.2	chr11:49168188..49230222,-	FOLH1	KIRP_ctrl	KIRP_cancer	coding_potential	TRUE	Transcript is Noncoding
uc001ngy.2,uc001ngx.2	uc001ngx.2	uc001ngy.2	chr11:49168188..49230222,-	FOLH1	KIRP_ctrl	KIRP_cancer	ORF_seq_similarity	TRUE	ORF is shorter
uc001ngy.2,uc001ngx.2	uc001ngx.2	uc001ngy.2	chr11:49168188..49230222,-	FOLH1	KIRP_ctrl	KIRP_cancer	domains_identified	TRUE	Domain loss
uc001lqd.2,uc001lqb.2	uc001lqb.2	uc001lqd.2	chr11:560404..564024,+	RASSF7	LUAD_ctrl	LUAD_cancer	intron_retention	TRUE	Intron retention gain
uc001lqc.2,uc001lqb.2	uc001lqb.2	uc001lqc.2	chr11:560404..564024,+	RASSF7	LUSC_ctrl	LUSC_cancer	intron_retention	TRUE	Intron retention gain
uc001mbm.1,uc001mbl.1	uc001mbl.1	uc001mbm.1	chr11:5684788..5959849,-	TRIM5	KICH_ctrl	KICH_cancer	ORF_seq_similarity	TRUE	Complete ORF loss
uc001mbm.1,uc001mbl.1	uc001mbl.1	uc001mbm.1	chr11:5684788..5959849,-	TRIM5	KICH_ctrl	KICH_cancer	domains_identified	TRUE	Domain loss
uc010rjq.1,uc001njt.2	uc001njt.2	uc010rjq.1	chr11:57093460..57103351,-	SSRP1	STAD_ctrl	STAD_cancer	ORF_seq_similarity	TRUE	ORF is longer
uc010rjq.1,uc001njt.2	uc001njt.2	uc010rjq.1	chr11:57093460..57103351,-	SSRP1	STAD_ctrl	STAD_cancer	domains_identified	TRUE	Domain gain
uc001nkx.1,uc001nky.1	uc001nky.1	uc001nkx.1	chr11:57435474..57468659,+	ZDHHC5	KIRC_ctrl	KIRC_cancer	signal_peptide_identified	TRUE	Signal peptide gain
uc001nkx.1,uc001nky.1	uc001nky.1	uc001nkx.1	chr11:57435474..57468659,+	ZDHHC5	KIRP_ctrl	KIRP_cancer	signal_peptide_identified	TRUE	Signal peptide gain
uc001nkx.1,uc001nky.1	uc001nky.1	uc001nkx.1	chr11:57435474..57468659,+	ZDHHC5	THCA_ctrl	THCA_cancer	signal_peptide_identified	TRUE	Signal peptide gain
uc001nlt.3,uc001nly.3	uc001nly.3	uc001nlt.3	chr11:57480042..57586651,+	CTNND1	KICH_ctrl	KICH_cancer	ORF_seq_similarity	TRUE	ORF is shorter
uc001nlo.3,uc001nmb.3	uc001nmb.3	uc001nlo.3	chr11:57480042..57586651,+	CTNND1	KIRC_ctrl	KIRC_cancer	ORF_seq_similarity	TRUE	ORF is shorter
uc001nmh.3,uc001nlt.3	uc001nlt.3	uc001nmh.3	chr11:57480042..57586651,+	CTNND1	LUSC_ctrl	LUSC_cancer	ORF_seq_similarity	TRUE	ORF is shorter
uc001nnb.2,uc001nnc.2	uc001nnc.2	uc001nnb.2	chr11:58476231..58499447,-	GLYAT	KIRC_ctrl	KIRC_cancer	intron_retention	TRUE	Intron retention gain
uc001nnb.2,uc001nnc.2	uc001nnc.2	uc001nnb.2	chr11:58476231..58499447,-	GLYAT	KIRC_ctrl	KIRC_cancer	ORF_seq_similarity	TRUE	ORF is shorter
uc001nnb.2,uc001nnc.2	uc001nnc.2	uc001nnb.2	chr11:58476231..58499447,-	GLYAT	KIRC_ctrl	KIRC_cancer	domains_identified	TRUE	Domain loss
uc001nnb.2,uc001nnc.2	uc001nnc.2	uc001nnb.2	chr11:58476231..58499447,-	GLYAT	KIRP_ctrl	KIRP_cancer	intron_retention	TRUE	Intron retention gain
uc001nnb.2,uc001nnc.2	uc001nnc.2	uc001nnb.2	chr11:58476231..58499447,-	GLYAT	KIRP_ctrl	KIRP_cancer	ORF_seq_similarity	TRUE	ORF is shorter
uc001nnb.2,uc001nnc.2	uc001nnc.2	uc001nnb.2	chr11:58476231..58499447,-	GLYAT	KIRP_ctrl	KIRP_cancer	domains_identified	TRUE	Domain loss
uc001nnb.2,uc001nnc.2	uc001nnc.2	uc001nnb.2	chr11:58476231..58499447,-	GLYAT	LIHC_ctrl	LIHC_cancer	intron_retention	TRUE	Intron retention gain
uc001nnb.2,uc001nnc.2	uc001nnc.2	uc001nnb.2	chr11:58476231..58499447,-	GLYAT	LIHC_ctrl	LIHC_cancer	ORF_seq_similarity	TRUE	ORF is shorter
uc001nnb.2,uc001nnc.2	uc001nnc.2	uc001nnb.2	chr11:58476231..58499447,-	GLYAT	LIHC_ctrl	LIHC_cancer	domains_identified	TRUE	Domain loss
uc001nnj.1,uc001nnh.1	uc001nnh.1	uc001nnj.1	chr11:58695138..58724516,+	GLYATL1	KIRC_ctrl	KIRC_cancer	intron_retention	TRUE	Intron retention loss
uc001nnj.1,uc001nnf.2	uc001nnf.2	uc001nnj.1	chr11:58695138..58724516,+	GLYATL1	KIRP_ctrl	KIRP_cancer	intron_retention	TRUE	Intron retention loss
uc009ynf.1,uc001npx.2	uc001npx.2	uc009ynf.1	chr11:60524340..60544204,+	MS4A15	LUSC_ctrl	LUSC_cancer	ORF_seq_similarity	TRUE	ORF is shorter
uc009yng.1,uc001npx.2	uc001npx.2	uc009yng.1	chr11:60524340..60544204,+	MS4A15	LUSC_ctrl	LUSC_cancer	ORF_seq_similarity	TRUE	ORF is shorter
uc001nqj.2,uc001nqm.2	uc001nqm.2	uc001nqj.2	chr11:60691913..60704630,+	TMEM132A	KIRP_ctrl	KIRP_cancer	intron_retention	TRUE	Intron retention gain
uc001nqj.2,uc001nqm.2	uc001nqm.2	uc001nqj.2	chr11:60691913..60704630,+	TMEM132A	KIRP_ctrl	KIRP_cancer	ORF_seq_similarity	TRUE	ORF is shorter
uc001nqj.2,uc001nqm.2	uc001nqm.2	uc001nqj.2	chr11:60691913..60704630,+	TMEM132A	KIRP_ctrl	KIRP_cancer	signal_peptide_identified	TRUE	Signal peptide loss
uc001lqf.2,uc001lqh.2	uc001lqh.2	uc001lqf.2	chr11:612556..615999,-	IRF7	BRCA_ctrl	BRCA_cancer	ORF_seq_similarity	TRUE	ORF is longer
uc001lqf.2,uc001lqh.2	uc001lqh.2	uc001lqf.2	chr11:612556..615999,-	IRF7	BRCA_ctrl	BRCA_cancer	domains_identified	TRUE	Domain gain
uc001lqf.2,uc001lqh.2	uc001lqh.2	uc001lqf.2	chr11:612556..615999,-	IRF7	LUAD_ctrl	LUAD_cancer	ORF_seq_similarity	TRUE	ORF is longer
uc001lqf.2,uc001lqh.2	uc001lqh.2	uc001lqf.2	chr11:612556..615999,-	IRF7	LUAD_ctrl	LUAD_cancer	domains_identified	TRUE	Domain gain
uc001nse.1,uc010rll.1	uc010rll.1	uc001nse.1	chr11:61520121..61555989,+	C11orf9	KICH_ctrl	KICH_cancer	ORF_seq_similarity	TRUE	ORF is shorter
uc001nse.1,uc010rll.1	uc010rll.1	uc001nse.1	chr11:61520121..61555989,+	C11orf9	KICH_ctrl	KICH_cancer	domains_identified	TRUE	Domain loss
uc001nse.1,uc010rll.1	uc010rll.1	uc001nse.1	chr11:61520121..61555989,+	C11orf9	LUSC_ctrl	LUSC_cancer	ORF_seq_similarity	TRUE	ORF is shorter
uc001nse.1,uc010rll.1	uc010rll.1	uc001nse.1	chr11:61520121..61555989,+	C11orf9	LUSC_ctrl	LUSC_cancer	domains_identified	TRUE	Domain loss
uc001nsl.1,uc001nsj.2	uc001nsj.2	uc001nsl.1	chr11:61583728..61634825,+	FADS2	COAD_ctrl	COAD_cancer	domains_identified	TRUE	Domain loss
uc001nsl.1,uc001nsj.2	uc001nsj.2	uc001nsl.1	chr11:61583728..61634825,+	FADS2	COAD_ctrl	COAD_cancer	signal_peptide_identified	TRUE	Signal peptide gain
uc001nsl.1,uc001nsj.2	uc001nsj.2	uc001nsl.1	chr11:61583728..61634825,+	FADS2	THCA_ctrl	THCA_cancer	domains_identified	TRUE	Domain loss
uc001nsl.1,uc001nsj.2	uc001nsj.2	uc001nsl.1	chr11:61583728..61634825,+	FADS2	THCA_ctrl	THCA_cancer	signal_peptide_identified	TRUE	Signal peptide gain
uc001lqk.2,uc001lqj.2	uc001lqj.2	uc001lqk.2	chr11:616577..626078,-	CDHR5	LIHC_ctrl	LIHC_cancer	ORF_seq_similarity	TRUE	ORF is longer
uc001ntq.1,uc010rlx.1	uc010rlx.1	uc001ntq.1	chr11:62360675..62369303,-	MTA2	KICH_ctrl	KICH_cancer	ORF_seq_similarity	TRUE	ORF is shorter
uc001ntq.1,uc010rlx.1	uc010rlx.1	uc001ntq.1	chr11:62360675..62369303,-	MTA2	KICH_ctrl	KICH_cancer	domains_identified	TRUE	Domain loss
uc001ntq.1,uc010rlx.1	uc010rlx.1	uc001ntq.1	chr11:62360675..62369303,-	MTA2	KIRC_ctrl	KIRC_cancer	ORF_seq_similarity	TRUE	ORF is shorter
uc001ntq.1,uc010rlx.1	uc010rlx.1	uc001ntq.1	chr11:62360675..62369303,-	MTA2	KIRC_ctrl	KIRC_cancer	domains_identified	TRUE	Domain loss
uc001nuh.2,uc001nug.1	uc001nug.1	uc001nuh.2	chr11:62432779..62435952,+	METTL12	PRAD_ctrl	PRAD_cancer	intron_retention	TRUE	Intron retention loss
uc001nuh.2,uc001nug.1	uc001nug.1	uc001nuh.2	chr11:62432779..62435952,+	METTL12	PRAD_ctrl	PRAD_cancer	coding_potential	TRUE	Transcript is coding
uc001nuh.2,uc001nug.1	uc001nug.1	uc001nuh.2	chr11:62432779..62435952,+	METTL12	PRAD_ctrl	PRAD_cancer	ORF_seq_similarity	TRUE	ORF is longer
uc001nuh.2,uc001nug.1	uc001nug.1	uc001nuh.2	chr11:62432779..62435952,+	METTL12	PRAD_ctrl	PRAD_cancer	domains_identified	TRUE	Domain gain
uc009yod.2,uc001nuq.1	uc001nuq.1	uc009yod.2	chr11:62457747..62477046,-	BSCL2	BRCA_ctrl	BRCA_cancer	ORF_seq_similarity	TRUE	ORF is shorter
uc001nup.2,uc009yod.2	uc009yod.2	uc001nup.2	chr11:62457747..62477046,-	BSCL2	KICH_ctrl	KICH_cancer	intron_retention	TRUE	Intron retention loss
uc001nup.2,uc009yod.2	uc009yod.2	uc001nup.2	chr11:62457747..62477046,-	BSCL2	KICH_ctrl	KICH_cancer	ORF_seq_similarity	TRUE	ORF is longer
uc009yoi.1,uc001nvk.1	uc001nvk.1	uc009yoi.1	chr11:62600384..62609281,-	WDR74	THCA_ctrl	THCA_cancer	ORF_seq_similarity	TRUE	ORF is shorter
uc001nwo.2,uc009yom.2	uc009yom.2	uc001nwo.2	chr11:62756626..62783311,-	SLC22A8	KIRC_ctrl	KIRC_cancer	ORF_seq_similarity	TRUE	ORF is shorter
uc001nwo.2,uc009yom.2	uc009yom.2	uc001nwo.2	chr11:62756626..62783311,-	SLC22A8	KIRP_ctrl	KIRP_cancer	ORF_seq_similarity	TRUE	ORF is shorter
uc009yon.2,uc009yom.2	uc009yom.2	uc009yon.2	chr11:62756626..62783311,-	SLC22A8	KIRP_ctrl	KIRP_cancer	ORF_seq_similarity	TRUE	ORF is shorter
uc001nwz.2,uc009yos.2	uc009yos.2	uc001nwz.2	chr11:63228876..63258680,-	HRASLS5	BRCA_ctrl	BRCA_cancer	coding_potential	TRUE	Transcript is Noncoding
uc001nwz.2,uc009yos.2	uc009yos.2	uc001nwz.2	chr11:63228876..63258680,-	HRASLS5	BRCA_ctrl	BRCA_cancer	ORF_seq_similarity	TRUE	Complete ORF loss
uc001nwz.2,uc009yos.2	uc009yos.2	uc001nwz.2	chr11:63228876..63258680,-	HRASLS5	BRCA_ctrl	BRCA_cancer	domains_identified	TRUE	Domain loss
uc001nxh.2,uc009you.1	uc009you.1	uc001nxh.2	chr11:63341944..63381941,-	PLA2G16	LIHC_ctrl	LIHC_cancer	intron_retention	TRUE	Intron retention loss
uc009you.1,uc001nxh.2	uc001nxh.2	uc009you.1	chr11:63341944..63381941,-	PLA2G16	LUSC_ctrl	LUSC_cancer	intron_retention	TRUE	Intron retention gain
uc001nxk.1,uc010rmr.1	uc010rmr.1	uc001nxk.1	chr11:63396437..63439444,-	ATL3	COAD_ctrl	COAD_cancer	ORF_seq_similarity	TRUE	ORF is shorter
uc001nxk.1,uc010rmr.1	uc010rmr.1	uc001nxk.1	chr11:63396437..63439444,-	ATL3	COAD_ctrl	COAD_cancer	domains_identified	TRUE	Domain loss
uc001nxk.1,uc010rmr.1	uc010rmr.1	uc001nxk.1	chr11:63396437..63439444,-	ATL3	KIRP_ctrl	KIRP_cancer	ORF_seq_similarity	TRUE	ORF is shorter
uc001nxk.1,uc010rmr.1	uc010rmr.1	uc001nxk.1	chr11:63396437..63439444,-	ATL3	KIRP_ctrl	KIRP_cancer	domains_identified	TRUE	Domain loss
uc001nys.2,uc001nyu.2	uc001nyu.2	uc001nys.2	chr11:63997753..64001752,+	DNAJC4	KICH_ctrl	KICH_cancer	intron_retention	TRUE	Intron retention gain
uc001oai.2,uc001oak.1	uc001oak.1	uc001oai.2	chr11:64323098..64338998,+	SLC22A11	KIRP_ctrl	KIRP_cancer	ORF_seq_similarity	TRUE	ORF is shorter
uc001oai.2,uc001oak.1	uc001oak.1	uc001oai.2	chr11:64323098..64338998,+	SLC22A11	KIRP_ctrl	KIRP_cancer	domains_identified	TRUE	Domain switch
uc001oam.1,uc001oan.1	uc001oan.1	uc001oam.1	chr11:64358282..64369820,+	SLC22A12	KIRP_ctrl	KIRP_cancer	ORF_seq_similarity	TRUE	ORF is shorter
uc001oam.1,uc001oan.1	uc001oan.1	uc001oam.1	chr11:64358282..64369820,+	SLC22A12	KIRP_ctrl	KIRP_cancer	domains_identified	TRUE	Domain switch
uc001obh.2,uc001obg.2	uc001obg.2	uc001obh.2	chr11:64556610..64570713,-	MAP4K2	KIRP_ctrl	KIRP_cancer	ORF_seq_similarity	TRUE	Complete ORF loss
uc001obh.2,uc001obg.2	uc001obg.2	uc001obh.2	chr11:64556610..64570713,-	MAP4K2	KIRP_ctrl	KIRP_cancer	domains_identified	TRUE	Domain loss
uc001obx.2,uc001obw.2	uc001obw.2	uc001obx.2	chr11:64662005..64684722,-	ATG2A	THCA_ctrl	THCA_cancer	ORF_seq_similarity	TRUE	ORF is shorter
uc001obx.2,uc001obw.2	uc001obw.2	uc001obx.2	chr11:64662005..64684722,-	ATG2A	THCA_ctrl	THCA_cancer	domains_identified	TRUE	Domain loss
uc001oct.2,uc010rny.1	uc010rny.1	uc001oct.2	chr11:64879341..64883706,+	TM7SF2	KIRC_ctrl	KIRC_cancer	ORF_seq_similarity	TRUE	ORF is shorter
uc001oct.2,uc010rny.1	uc010rny.1	uc001oct.2	chr11:64879341..64883706,+	TM7SF2	LUSC_ctrl	LUSC_cancer	ORF_seq_similarity	TRUE	ORF is shorter
uc010roh.1,uc001odz.2	uc001odz.2	uc010roh.1	chr11:65265233..65273937,+	MALAT1	LUSC_ctrl	LUSC_cancer	intron_retention	TRUE	Intron retention loss
uc010rok.1,uc001oeg.2	uc001oeg.2	uc010rok.1	chr11:65306031..65326253,-	LTBP3	COAD_ctrl	COAD_cancer	ORF_seq_similarity	TRUE	ORF is shorter
uc010rok.1,uc001oeg.2	uc001oeg.2	uc010rok.1	chr11:65306031..65326253,-	LTBP3	COAD_ctrl	COAD_cancer	domains_identified	TRUE	Domain loss
uc010rok.1,uc001oeg.2	uc001oeg.2	uc010rok.1	chr11:65306031..65326253,-	LTBP3	KIRP_ctrl	KIRP_cancer	ORF_seq_similarity	TRUE	ORF is shorter
uc010rok.1,uc001oeg.2	uc001oeg.2	uc010rok.1	chr11:65306031..65326253,-	LTBP3	KIRP_ctrl	KIRP_cancer	domains_identified	TRUE	Domain loss
uc010rok.1,uc001oeg.2	uc001oeg.2	uc010rok.1	chr11:65306031..65326253,-	LTBP3	LUSC_ctrl	LUSC_cancer	ORF_seq_similarity	TRUE	ORF is shorter
uc010rok.1,uc001oeg.2	uc001oeg.2	uc010rok.1	chr11:65306031..65326253,-	LTBP3	LUSC_ctrl	LUSC_cancer	domains_identified	TRUE	Domain loss
uc001oej.2,uc001oeg.2	uc001oeg.2	uc001oej.2	chr11:65306031..65326253,-	LTBP3	STAD_ctrl	STAD_cancer	ORF_seq_similarity	TRUE	ORF is shorter
uc001oej.2,uc001oeg.2	uc001oeg.2	uc001oej.2	chr11:65306031..65326253,-	LTBP3	STAD_ctrl	STAD_cancer	domains_identified	TRUE	Domain loss
uc001oej.2,uc001oeg.2	uc001oeg.2	uc001oej.2	chr11:65306031..65326253,-	LTBP3	STAD_ctrl	STAD_cancer	signal_peptide_identified	TRUE	Signal peptide loss
uc001ofb.2,uc010rom.1	uc010rom.1	uc001ofb.2	chr11:65405578..65418391,+	SIPA1	COAD_ctrl	COAD_cancer	intron_retention	TRUE	Intron retention loss
uc010rom.1,uc001ofb.2	uc001ofb.2	uc010rom.1	chr11:65405578..65418391,+	SIPA1	KIRC_ctrl	KIRC_cancer	intron_retention	TRUE	Intron retention gain
uc001ofb.2,uc010rom.1	uc010rom.1	uc001ofb.2	chr11:65405578..65418391,+	SIPA1	LUAD_ctrl	LUAD_cancer	intron_retention	TRUE	Intron retention loss
uc001oha.1,uc010rou.1	uc010rou.1	uc001oha.1	chr11:65837824..66012213,+	PACS1	THCA_ctrl	THCA_cancer	ORF_seq_similarity	TRUE	ORF is shorter
uc001mee.2,uc001mei.2	uc001mei.2	uc001mee.2	chr11:6624964..6632097,+	ILK	STAD_ctrl	STAD_cancer	ORF_seq_similarity	TRUE	ORF is shorter
uc001mee.2,uc001mei.2	uc001mei.2	uc001mee.2	chr11:6624964..6632097,+	ILK	STAD_ctrl	STAD_cancer	domains_identified	TRUE	Domain loss
uc001oim.1,uc001oin.1	uc001oin.1	uc001oim.1	chr11:66288108..66313671,-	ZDHHC24	BRCA_ctrl	BRCA_cancer	ORF_seq_similarity	TRUE	Complete ORF gain
uc001oim.1,uc001oin.1	uc001oin.1	uc001oim.1	chr11:66288108..66313671,-	ZDHHC24	BRCA_ctrl	BRCA_cancer	domains_identified	TRUE	Domain gain
uc001ojd.2,uc001ojc.1	uc001ojc.1	uc001ojd.2	chr11:66452721..66488870,-	SPTBN2	KIRC_ctrl	KIRC_cancer	intron_retention	TRUE	Intron retention gain
uc001ojd.2,uc001ojc.1	uc001ojc.1	uc001ojd.2	chr11:66452721..66488870,-	SPTBN2	KIRC_ctrl	KIRC_cancer	ORF_seq_similarity	TRUE	ORF is shorter
uc001ojd.2,uc001ojc.1	uc001ojc.1	uc001ojd.2	chr11:66452721..66488870,-	SPTBN2	KIRC_ctrl	KIRC_cancer	domains_identified	TRUE	Domain loss
uc001ojf.2,uc001oji.2	uc001oji.2	uc001ojf.2	chr11:66512207..66610987,+	C11orf80	KIRC_ctrl	KIRC_cancer	ORF_seq_similarity	TRUE	ORF is shorter
uc001ojf.2,uc001oji.2	uc001oji.2	uc001ojf.2	chr11:66512207..66610987,+	C11orf80	KIRP_ctrl	KIRP_cancer	ORF_seq_similarity	TRUE	ORF is shorter
uc001ojn.1,uc001ojm.1	uc001ojm.1	uc001ojn.1	chr11:66615997..66725847,-	PC	KIRP_ctrl	KIRP_cancer	ORF_seq_similarity	TRUE	ORF is shorter
uc001ojn.1,uc001ojm.1	uc001ojm.1	uc001ojn.1	chr11:66615997..66725847,-	PC	KIRP_ctrl	KIRP_cancer	domains_identified	TRUE	Domain loss
uc001okd.1,uc001oki.1	uc001oki.1	uc001okd.1	chr11:67056819..67069954,+	ANKRD13D	KIRP_ctrl	KIRP_cancer	ORF_seq_similarity	TRUE	ORF is shorter
uc001okd.1,uc001oki.1	uc001oki.1	uc001okd.1	chr11:67056819..67069954,+	ANKRD13D	KIRP_ctrl	KIRP_cancer	domains_identified	TRUE	Domain loss
uc001okm.2,uc001oko.2	uc001oko.2	uc001okm.2	chr11:67119021..67121050,-	POLD4	LUSC_ctrl	LUSC_cancer	coding_potential	TRUE	Transcript is Noncoding
uc001okm.2,uc001oko.2	uc001oko.2	uc001okm.2	chr11:67119021..67121050,-	POLD4	LUSC_ctrl	LUSC_cancer	ORF_seq_similarity	TRUE	Complete ORF loss
uc001okm.2,uc001oko.2	uc001oko.2	uc001okm.2	chr11:67119021..67121050,-	POLD4	LUSC_ctrl	LUSC_cancer	domains_identified	TRUE	Domain loss
uc001omt.3,uc001omu.3	uc001omu.3	uc001omt.3	chr11:67559240..67572807,-	LOC645332	LUSC_ctrl	LUSC_cancer	coding_potential	TRUE	Transcript is Noncoding
uc001omt.3,uc001omu.3	uc001omu.3	uc001omt.3	chr11:67559240..67572807,-	LOC645332	LUSC_ctrl	LUSC_cancer	ORF_seq_similarity	TRUE	ORF is shorter
uc001onm.1,uc009yse.1	uc009yse.1	uc001onm.1	chr11:67923507..67981068,-	SUV420H1	THCA_ctrl	THCA_cancer	ORF_seq_similarity	TRUE	ORF is shorter
uc001onm.1,uc009yse.1	uc009yse.1	uc001onm.1	chr11:67923507..67981068,-	SUV420H1	THCA_ctrl	THCA_cancer	domains_identified	TRUE	Domain loss
uc001onw.2,uc001onz.2	uc001onz.2	uc001onw.2	chr11:68228186..68382799,+	SAPS3	KIRC_ctrl	KIRC_cancer	ORF_seq_similarity	TRUE	ORF is shorter
uc001onw.2,uc001onz.2	uc001onz.2	uc001onw.2	chr11:68228186..68382799,+	SAPS3	KIRC_ctrl	KIRC_cancer	domains_identified	TRUE	Domain loss
uc001ooc.2,uc001ooe.2	uc001ooe.2	uc001ooc.2	chr11:68474910..68518988,-	MTL5	COAD_ctrl	COAD_cancer	ORF_seq_similarity	TRUE	ORF is shorter
uc001ooc.2,uc001ooe.2	uc001ooe.2	uc001ooc.2	chr11:68474910..68518988,-	MTL5	COAD_ctrl	COAD_cancer	domains_identified	TRUE	Domain loss
uc001oot.2,uc001oos.2	uc001oos.2	uc001oot.2	chr11:68816350..68929907,+	TPCN2	KICH_ctrl	KICH_cancer	ORF_seq_similarity	TRUE	Complete ORF gain
uc001oot.2,uc001oos.2	uc001oos.2	uc001oot.2	chr11:68816350..68929907,+	TPCN2	KICH_ctrl	KICH_cancer	domains_identified	TRUE	Domain gain
uc001oot.2,uc001oos.2	uc001oos.2	uc001oot.2	chr11:68816350..68929907,+	TPCN2	KIRC_ctrl	KIRC_cancer	ORF_seq_similarity	TRUE	Complete ORF gain
uc001oot.2,uc001oos.2	uc001oos.2	uc001oot.2	chr11:68816350..68929907,+	TPCN2	KIRC_ctrl	KIRC_cancer	domains_identified	TRUE	Domain gain
uc001oot.2,uc001oos.2	uc001oos.2	uc001oot.2	chr11:68816350..68929907,+	TPCN2	KIRP_ctrl	KIRP_cancer	ORF_seq_similarity	TRUE	Complete ORF gain
uc001oot.2,uc001oos.2	uc001oos.2	uc001oot.2	chr11:68816350..68929907,+	TPCN2	KIRP_ctrl	KIRP_cancer	domains_identified	TRUE	Domain gain
uc001oot.2,uc001oos.2	uc001oos.2	uc001oot.2	chr11:68816350..68929907,+	TPCN2	STAD_ctrl	STAD_cancer	ORF_seq_similarity	TRUE	Complete ORF gain
uc001oot.2,uc001oos.2	uc001oos.2	uc001oot.2	chr11:68816350..68929907,+	TPCN2	STAD_ctrl	STAD_cancer	domains_identified	TRUE	Domain gain
uc001opj.2,uc010rqk.1	uc010rqk.1	uc001opj.2	chr11:69924408..70035649,+	ANO1	LUSC_ctrl	LUSC_cancer	intron_retention	TRUE	Intron retention gain
uc001opj.2,uc010rqk.1	uc010rqk.1	uc001opj.2	chr11:69924408..70035649,+	ANO1	LUSC_ctrl	LUSC_cancer	ORF_seq_similarity	TRUE	ORF is shorter
uc001opj.2,uc010rqk.1	uc010rqk.1	uc001opj.2	chr11:69924408..70035649,+	ANO1	LUSC_ctrl	LUSC_cancer	NMD_status	TRUE	NMD insensitive
uc001opo.2,uc001opr.2	uc001opr.2	uc001opo.2	chr11:70116823..70230500,+	PPFIA1	COAD_ctrl	COAD_cancer	ORF_seq_similarity	TRUE	ORF is shorter
uc001opo.2,uc001opr.2	uc001opr.2	uc001opo.2	chr11:70116823..70230500,+	PPFIA1	COAD_ctrl	COAD_cancer	domains_identified	TRUE	Domain loss
uc001opo.2,uc001opr.2	uc001opr.2	uc001opo.2	chr11:70116823..70230500,+	PPFIA1	THCA_ctrl	THCA_cancer	ORF_seq_similarity	TRUE	ORF is shorter
uc001opo.2,uc001opr.2	uc001opr.2	uc001opo.2	chr11:70116823..70230500,+	PPFIA1	THCA_ctrl	THCA_cancer	domains_identified	TRUE	Domain loss
uc001opw.3,uc001opv.3	uc001opv.3	uc001opw.3	chr11:70244612..70282689,+	CTTN	COAD_ctrl	COAD_cancer	domains_identified	TRUE	Domain gain
uc001opw.3,uc001opv.3	uc001opv.3	uc001opw.3	chr11:70244612..70282689,+	CTTN	STAD_ctrl	STAD_cancer	domains_identified	TRUE	Domain gain
uc001oqc.2,uc001opy.2	uc001opy.2	uc001oqc.2	chr11:70313962..70935808,-	SHANK2	THCA_ctrl	THCA_cancer	ORF_seq_similarity	TRUE	ORF is shorter
uc001oqc.2,uc001opy.2	uc001opy.2	uc001oqc.2	chr11:70313962..70935808,-	SHANK2	THCA_ctrl	THCA_cancer	domains_identified	TRUE	Domain loss
uc001orx.1,uc001ory.1	uc001ory.1	uc001orx.1	chr11:71846771..71850934,+	FOLR3	KICH_ctrl	KICH_cancer	intron_retention	TRUE	Intron retention gain
uc001orx.1,uc001ory.1	uc001ory.1	uc001orx.1	chr11:71846771..71850934,+	FOLR3	KICH_ctrl	KICH_cancer	ORF_seq_similarity	TRUE	ORF is longer
uc001oso.2,uc001osn.2	uc001osn.2	uc001oso.2	chr11:72287186..72385494,-	PDE2A	BRCA_ctrl	BRCA_cancer	ORF_seq_similarity	TRUE	ORF is shorter
uc001oso.2,uc001osn.2	uc001osn.2	uc001oso.2	chr11:72287186..72385494,-	PDE2A	BRCA_ctrl	BRCA_cancer	domains_identified	TRUE	Domain loss
uc001oso.2,uc001osn.2	uc001osn.2	uc001oso.2	chr11:72287186..72385494,-	PDE2A	BRCA_ctrl	BRCA_cancer	signal_peptide_identified	TRUE	Signal peptide gain
uc001oso.2,uc001osn.2	uc001osn.2	uc001oso.2	chr11:72287186..72385494,-	PDE2A	KIRC_ctrl	KIRC_cancer	ORF_seq_similarity	TRUE	ORF is shorter
uc001oso.2,uc001osn.2	uc001osn.2	uc001oso.2	chr11:72287186..72385494,-	PDE2A	KIRC_ctrl	KIRC_cancer	domains_identified	TRUE	Domain loss
uc001oso.2,uc001osn.2	uc001osn.2	uc001oso.2	chr11:72287186..72385494,-	PDE2A	KIRC_ctrl	KIRC_cancer	signal_peptide_identified	TRUE	Signal peptide gain
uc001oso.2,uc001osn.2	uc001osn.2	uc001oso.2	chr11:72287186..72385494,-	PDE2A	KIRP_ctrl	KIRP_cancer	ORF_seq_similarity	TRUE	ORF is shorter
uc001oso.2,uc001osn.2	uc001osn.2	uc001oso.2	chr11:72287186..72385494,-	PDE2A	KIRP_ctrl	KIRP_cancer	domains_identified	TRUE	Domain loss
uc001oso.2,uc001osn.2	uc001osn.2	uc001oso.2	chr11:72287186..72385494,-	PDE2A	KIRP_ctrl	KIRP_cancer	signal_peptide_identified	TRUE	Signal peptide gain
uc001oso.2,uc001osn.2	uc001osn.2	uc001oso.2	chr11:72287186..72385494,-	PDE2A	LUAD_ctrl	LUAD_cancer	ORF_seq_similarity	TRUE	ORF is shorter
uc001oso.2,uc001osn.2	uc001osn.2	uc001oso.2	chr11:72287186..72385494,-	PDE2A	LUAD_ctrl	LUAD_cancer	domains_identified	TRUE	Domain loss
uc001oso.2,uc001osn.2	uc001osn.2	uc001oso.2	chr11:72287186..72385494,-	PDE2A	LUAD_ctrl	LUAD_cancer	signal_peptide_identified	TRUE	Signal peptide gain
uc001osu.2,uc001oss.2	uc001oss.2	uc001osu.2	chr11:72396115..72504750,-	ARAP1	LUSC_ctrl	LUSC_cancer	ORF_seq_similarity	TRUE	ORF is shorter
uc001osu.2,uc001oss.2	uc001oss.2	uc001osu.2	chr11:72396115..72504750,-	ARAP1	LUSC_ctrl	LUSC_cancer	domains_identified	TRUE	Domain loss
uc009ytl.2,uc001oth.3	uc001oth.3	uc009ytl.2	chr11:72547791..72853143,-	FCHSD2	THCA_ctrl	THCA_cancer	domains_identified	TRUE	Domain loss
uc001ouw.2,uc001oux.2	uc001oux.2	uc001ouw.2	chr11:73882368..73965747,+	PPME1	KIRP_ctrl	KIRP_cancer	ORF_seq_similarity	TRUE	ORF is shorter
uc001ouw.2,uc001oux.2	uc001oux.2	uc001ouw.2	chr11:73882368..73965747,+	PPME1	THCA_ctrl	THCA_cancer	ORF_seq_similarity	TRUE	ORF is shorter
uc001owb.2,uc001owc.2	uc001owc.2	uc001owb.2	chr11:74811540..74917444,+	SLCO2B1	BRCA_ctrl	BRCA_cancer	ORF_seq_similarity	TRUE	ORF is shorter
uc001owb.2,uc001owc.2	uc001owc.2	uc001owb.2	chr11:74811540..74917444,+	SLCO2B1	BRCA_ctrl	BRCA_cancer	domains_identified	TRUE	Domain gain
uc001owd.2,uc001owc.2	uc001owc.2	uc001owd.2	chr11:74811540..74917444,+	SLCO2B1	KICH_ctrl	KICH_cancer	ORF_seq_similarity	TRUE	ORF is shorter
uc001owd.2,uc001owc.2	uc001owc.2	uc001owd.2	chr11:74811540..74917444,+	SLCO2B1	KICH_ctrl	KICH_cancer	domains_identified	TRUE	Domain gain
uc001owd.2,uc001owc.2	uc001owc.2	uc001owd.2	chr11:74811540..74917444,+	SLCO2B1	KIRC_ctrl	KIRC_cancer	ORF_seq_similarity	TRUE	ORF is shorter
uc001owd.2,uc001owc.2	uc001owc.2	uc001owd.2	chr11:74811540..74917444,+	SLCO2B1	KIRC_ctrl	KIRC_cancer	domains_identified	TRUE	Domain gain
uc001owd.2,uc001owc.2	uc001owc.2	uc001owd.2	chr11:74811540..74917444,+	SLCO2B1	KIRP_ctrl	KIRP_cancer	ORF_seq_similarity	TRUE	ORF is shorter
uc001owd.2,uc001owc.2	uc001owc.2	uc001owd.2	chr11:74811540..74917444,+	SLCO2B1	KIRP_ctrl	KIRP_cancer	domains_identified	TRUE	Domain gain
uc001owd.2,uc001owc.2	uc001owc.2	uc001owd.2	chr11:74811540..74917444,+	SLCO2B1	LIHC_ctrl	LIHC_cancer	ORF_seq_similarity	TRUE	ORF is shorter
uc001owd.2,uc001owc.2	uc001owc.2	uc001owd.2	chr11:74811540..74917444,+	SLCO2B1	LIHC_ctrl	LIHC_cancer	domains_identified	TRUE	Domain gain
uc001owb.2,uc001owc.2	uc001owc.2	uc001owb.2	chr11:74811540..74917444,+	SLCO2B1	LUAD_ctrl	LUAD_cancer	ORF_seq_similarity	TRUE	ORF is shorter
uc001owb.2,uc001owc.2	uc001owc.2	uc001owb.2	chr11:74811540..74917444,+	SLCO2B1	LUAD_ctrl	LUAD_cancer	domains_identified	TRUE	Domain gain
uc001owb.2,uc001owc.2	uc001owc.2	uc001owb.2	chr11:74811540..74917444,+	SLCO2B1	LUSC_ctrl	LUSC_cancer	ORF_seq_similarity	TRUE	ORF is shorter
uc001owb.2,uc001owc.2	uc001owc.2	uc001owb.2	chr11:74811540..74917444,+	SLCO2B1	LUSC_ctrl	LUSC_cancer	domains_identified	TRUE	Domain gain
uc001mfl.3,uc001mfj.3	uc001mfj.3	uc001mfl.3	chr11:7535001..7678358,+	PPFIBP2	LUSC_ctrl	LUSC_cancer	ORF_seq_similarity	TRUE	ORF is longer
uc010rru.1,uc001oww.1	uc001oww.1	uc010rru.1	chr11:75428934..75442330,+	MOGAT2	COAD_ctrl	COAD_cancer	intron_retention	TRUE	Intron retention gain
uc010rru.1,uc001oww.1	uc001oww.1	uc010rru.1	chr11:75428934..75442330,+	MOGAT2	COAD_ctrl	COAD_cancer	ORF_seq_similarity	TRUE	ORF is shorter
uc001oxc.2,uc010rrw.1	uc010rrw.1	uc001oxc.2	chr11:75526212..75855281,+	UVRAG	KICH_ctrl	KICH_cancer	ORF_seq_similarity	TRUE	ORF is shorter
uc001oxc.2,uc010rrw.1	uc010rrw.1	uc001oxc.2	chr11:75526212..75855281,+	UVRAG	KICH_ctrl	KICH_cancer	domains_identified	TRUE	Domain loss
uc010rrw.1,uc001oxd.2	uc001oxd.2	uc010rrw.1	chr11:75526212..75855281,+	UVRAG	LUSC_ctrl	LUSC_cancer	ORF_seq_similarity	TRUE	ORF is shorter
uc010rrw.1,uc001oxd.2	uc001oxd.2	uc010rrw.1	chr11:75526212..75855281,+	UVRAG	LUSC_ctrl	LUSC_cancer	domains_identified	TRUE	Domain loss
uc001oyh.3,uc010rsn.1	uc010rsn.1	uc001oyh.3	chr11:77033061..77185108,-	PAK1	KIRC_ctrl	KIRC_cancer	ORF_seq_similarity	TRUE	ORF is shorter
uc001oyh.3,uc010rsn.1	uc010rsn.1	uc001oyh.3	chr11:77033061..77185108,-	PAK1	KIRC_ctrl	KIRC_cancer	domains_identified	TRUE	Domain loss
uc010rsq.1,uc001ozi.2	uc001ozi.2	uc010rsq.1	chr11:78147017..78285909,-	NARS2	LUAD_ctrl	LUAD_cancer	ORF_seq_similarity	TRUE	ORF is longer
uc010rsq.1,uc001ozi.2	uc001ozi.2	uc010rsq.1	chr11:78147017..78285909,-	NARS2	LUAD_ctrl	LUAD_cancer	domains_identified	TRUE	Domain gain
uc010rsq.1,uc001ozi.2	uc001ozi.2	uc010rsq.1	chr11:78147017..78285909,-	NARS2	LUSC_ctrl	LUSC_cancer	ORF_seq_similarity	TRUE	ORF is longer
uc010rsq.1,uc001ozi.2	uc001ozi.2	uc010rsq.1	chr11:78147017..78285909,-	NARS2	LUSC_ctrl	LUSC_cancer	domains_identified	TRUE	Domain gain
uc001lrv.2,uc001lrw.2	uc001lrw.2	uc001lrv.2	chr11:826157..831991,+	EFCAB4A	HNSC_ctrl	HNSC_cancer	intron_retention	TRUE	Intron retention gain
uc001lrv.2,uc001lrw.2	uc001lrw.2	uc001lrv.2	chr11:826157..831991,+	EFCAB4A	HNSC_ctrl	HNSC_cancer	ORF_seq_similarity	TRUE	ORF is longer
uc001lrv.2,uc001lrw.2	uc001lrw.2	uc001lrv.2	chr11:826157..831991,+	EFCAB4A	KIRC_ctrl	KIRC_cancer	intron_retention	TRUE	Intron retention gain
uc001lrv.2,uc001lrw.2	uc001lrw.2	uc001lrv.2	chr11:826157..831991,+	EFCAB4A	KIRC_ctrl	KIRC_cancer	ORF_seq_similarity	TRUE	ORF is longer
uc001lrv.2,uc001lrw.2	uc001lrw.2	uc001lrv.2	chr11:826157..831991,+	EFCAB4A	LUSC_ctrl	LUSC_cancer	intron_retention	TRUE	Intron retention gain
uc001lrv.2,uc001lrw.2	uc001lrw.2	uc001lrv.2	chr11:826157..831991,+	EFCAB4A	LUSC_ctrl	LUSC_cancer	ORF_seq_similarity	TRUE	ORF is longer
uc001ozx.3,uc001ozy.2	uc001ozy.2	uc001ozx.3	chr11:82868137..82896833,+	PCF11	LUSC_ctrl	LUSC_cancer	ORF_seq_similarity	TRUE	ORF is shorter
uc001ozx.3,uc001ozy.2	uc001ozy.2	uc001ozx.3	chr11:82868137..82896833,+	PCF11	LUSC_ctrl	LUSC_cancer	domains_identified	TRUE	Domain loss
uc001pab.1,uc009yvi.1	uc009yvi.1	uc001pab.1	chr11:82905291..82967042,+	ANKRD42	HNSC_ctrl	HNSC_cancer	ORF_seq_similarity	TRUE	ORF is shorter
uc001pab.1,uc009yvi.1	uc009yvi.1	uc001pab.1	chr11:82905291..82967042,+	ANKRD42	HNSC_ctrl	HNSC_cancer	domains_identified	TRUE	Domain switch
uc001pab.1,uc009yvi.1	uc009yvi.1	uc001pab.1	chr11:82905291..82967042,+	ANKRD42	KICH_ctrl	KICH_cancer	ORF_seq_similarity	TRUE	ORF is shorter
uc001pab.1,uc009yvi.1	uc009yvi.1	uc001pab.1	chr11:82905291..82967042,+	ANKRD42	KICH_ctrl	KICH_cancer	domains_identified	TRUE	Domain switch
uc001pab.1,uc009yvi.1	uc009yvi.1	uc001pab.1	chr11:82905291..82967042,+	ANKRD42	LUSC_ctrl	LUSC_cancer	ORF_seq_similarity	TRUE	ORF is shorter
uc001pab.1,uc009yvi.1	uc009yvi.1	uc001pab.1	chr11:82905291..82967042,+	ANKRD42	LUSC_ctrl	LUSC_cancer	domains_identified	TRUE	Domain switch
uc001mgk.1,uc001mgl.3	uc001mgl.3	uc001mgk.1	chr11:8413418..8615775,-	STK33	KIRP_ctrl	KIRP_cancer	ORF_seq_similarity	TRUE	ORF is shorter
uc001pbb.2,uc001pax.2	uc001pax.2	uc001pbb.2	chr11:85405267..85522178,-	SYTL2	KIRC_ctrl	KIRC_cancer	ORF_seq_similarity	TRUE	ORF is shorter
uc010rtg.1,uc001pax.2	uc001pax.2	uc010rtg.1	chr11:85405267..85522178,-	SYTL2	KIRC_ctrl	KIRC_cancer	ORF_seq_similarity	TRUE	ORF is shorter
uc010rtg.1,uc001pax.2	uc001pax.2	uc010rtg.1	chr11:85405267..85522178,-	SYTL2	KIRC_ctrl	KIRC_cancer	domains_identified	TRUE	Domain loss
uc010rti.1,uc001pax.2	uc001pax.2	uc010rti.1	chr11:85405267..85522178,-	SYTL2	KIRC_ctrl	KIRC_cancer	ORF_seq_similarity	TRUE	ORF is shorter
uc010rti.1,uc001pax.2	uc001pax.2	uc010rti.1	chr11:85405267..85522178,-	SYTL2	KIRC_ctrl	KIRC_cancer	domains_identified	TRUE	Domain loss
uc001pbb.2,uc001pax.2	uc001pax.2	uc001pbb.2	chr11:85405267..85522178,-	SYTL2	KIRP_ctrl	KIRP_cancer	ORF_seq_similarity	TRUE	ORF is shorter
uc010rtg.1,uc001pax.2	uc001pax.2	uc010rtg.1	chr11:85405267..85522178,-	SYTL2	KIRP_ctrl	KIRP_cancer	ORF_seq_similarity	TRUE	ORF is shorter
uc010rtg.1,uc001pax.2	uc001pax.2	uc010rtg.1	chr11:85405267..85522178,-	SYTL2	KIRP_ctrl	KIRP_cancer	domains_identified	TRUE	Domain loss
uc010rti.1,uc001pax.2	uc001pax.2	uc010rti.1	chr11:85405267..85522178,-	SYTL2	KIRP_ctrl	KIRP_cancer	ORF_seq_similarity	TRUE	ORF is shorter
uc010rti.1,uc001pax.2	uc001pax.2	uc010rti.1	chr11:85405267..85522178,-	SYTL2	KIRP_ctrl	KIRP_cancer	domains_identified	TRUE	Domain loss
uc001pbl.2,uc001pbk.2	uc001pbk.2	uc001pbl.2	chr11:85668486..85780900,-	PICALM	KICH_ctrl	KICH_cancer	coding_potential	TRUE	Transcript is Noncoding
uc001pbl.2,uc001pbk.2	uc001pbk.2	uc001pbl.2	chr11:85668486..85780900,-	PICALM	KICH_ctrl	KICH_cancer	ORF_seq_similarity	TRUE	Complete ORF loss
uc001pbl.2,uc001pbk.2	uc001pbk.2	uc001pbl.2	chr11:85668486..85780900,-	PICALM	KICH_ctrl	KICH_cancer	domains_identified	TRUE	Domain loss
uc001mgt.2,uc010rbp.1	uc010rbp.1	uc001mgt.2	chr11:8714900..8932498,-	ST5	KIRC_ctrl	KIRC_cancer	ORF_seq_similarity	TRUE	ORF is shorter
uc001mgt.2,uc010rbp.1	uc010rbp.1	uc001mgt.2	chr11:8714900..8932498,-	ST5	KIRP_ctrl	KIRP_cancer	ORF_seq_similarity	TRUE	ORF is shorter
uc001mhe.1,uc010rbt.1	uc010rbt.1	uc001mhe.1	chr11:8968840..8986481,-	TMEM9B	LUAD_ctrl	LUAD_cancer	ORF_seq_similarity	TRUE	ORF is shorter
uc001mhe.1,uc010rbt.1	uc010rbt.1	uc001mhe.1	chr11:8968840..8986481,-	TMEM9B	LUAD_ctrl	LUAD_cancer	signal_peptide_identified	TRUE	Signal peptide loss
uc001pff.2,uc001pfg.1	uc001pfg.1	uc001pff.2	chr11:94800056..94804387,+	SFRS2B	LUAD_ctrl	LUAD_cancer	coding_potential	TRUE	Transcript is Noncoding
uc001pff.2,uc001pfg.1	uc001pfg.1	uc001pff.2	chr11:94800056..94804387,+	SFRS2B	LUAD_ctrl	LUAD_cancer	ORF_seq_similarity	TRUE	Complete ORF loss
uc001pff.2,uc001pfg.1	uc001pfg.1	uc001pff.2	chr11:94800056..94804387,+	SFRS2B	LUAD_ctrl	LUAD_cancer	domains_identified	TRUE	Domain loss
uc001pff.2,uc001pfg.1	uc001pfg.1	uc001pff.2	chr11:94800056..94804387,+	SFRS2B	LUSC_ctrl	LUSC_cancer	coding_potential	TRUE	Transcript is Noncoding
uc001pff.2,uc001pfg.1	uc001pfg.1	uc001pff.2	chr11:94800056..94804387,+	SFRS2B	LUSC_ctrl	LUSC_cancer	ORF_seq_similarity	TRUE	Complete ORF loss
uc001pff.2,uc001pfg.1	uc001pfg.1	uc001pff.2	chr11:94800056..94804387,+	SFRS2B	LUSC_ctrl	LUSC_cancer	domains_identified	TRUE	Domain loss
uc001pfm.2,uc001pfn.2	uc001pfn.2	uc001pfm.2	chr11:95502106..95522954,-	FAM76B	BRCA_ctrl	BRCA_cancer	ORF_seq_similarity	TRUE	Complete ORF gain
uc001pfs.2,uc001pfu.2	uc001pfu.2	uc001pfs.2	chr11:95566046..95657371,-	MTMR2	KICH_ctrl	KICH_cancer	ORF_seq_similarity	TRUE	ORF is longer
uc001mib.2,uc001mic.2	uc001mic.2	uc001mib.2	chr11:9800214..10315754,-	SBF2	KIRC_ctrl	KIRC_cancer	ORF_seq_similarity	TRUE	ORF is shorter
uc001mib.2,uc001mic.2	uc001mic.2	uc001mib.2	chr11:9800214..10315754,-	SBF2	KIRC_ctrl	KIRC_cancer	domains_identified	TRUE	Domain loss
uc001mib.2,uc001mic.2	uc001mic.2	uc001mib.2	chr11:9800214..10315754,-	SBF2	THCA_ctrl	THCA_cancer	ORF_seq_similarity	TRUE	ORF is shorter
uc001mib.2,uc001mic.2	uc001mic.2	uc001mib.2	chr11:9800214..10315754,-	SBF2	THCA_ctrl	THCA_cancer	domains_identified	TRUE	Domain loss
uc001tgq.2,uc001tgp.2	uc001tgp.2	uc001tgq.2	chr12:100430865..100536642,-	UHRF1BP1L	STAD_ctrl	STAD_cancer	ORF_seq_similarity	TRUE	ORF is shorter
uc001tgq.2,uc001tgp.2	uc001tgp.2	uc001tgq.2	chr12:100430865..100536642,-	UHRF1BP1L	STAD_ctrl	STAD_cancer	domains_identified	TRUE	Domain loss
uc001tgq.2,uc001tgp.2	uc001tgp.2	uc001tgq.2	chr12:100430865..100536642,-	UHRF1BP1L	THCA_ctrl	THCA_cancer	ORF_seq_similarity	TRUE	ORF is shorter
uc001tgq.2,uc001tgp.2	uc001tgp.2	uc001tgq.2	chr12:100430865..100536642,-	UHRF1BP1L	THCA_ctrl	THCA_cancer	domains_identified	TRUE	Domain loss
uc001tjo.2,uc001tjp.3	uc001tjp.3	uc001tjo.2	chr12:102789645..102874378,-	IGF1	LIHC_ctrl	LIHC_cancer	ORF_seq_similarity	TRUE	ORF is longer
uc001qxo.1,uc010sgz.1	uc010sgz.1	uc001qxo.1	chr12:10310899..10324790,-	OLR1	LUAD_ctrl	LUAD_cancer	coding_potential	TRUE	Transcript is Noncoding
uc001qxo.1,uc010sgz.1	uc010sgz.1	uc001qxo.1	chr12:10310899..10324790,-	OLR1	LUAD_ctrl	LUAD_cancer	ORF_seq_similarity	TRUE	ORF is shorter
uc001qxo.1,uc010sgz.1	uc010sgz.1	uc001qxo.1	chr12:10310899..10324790,-	OLR1	LUAD_ctrl	LUAD_cancer	domains_identified	TRUE	Domain loss
uc001qxr.2,uc001qxq.2	uc001qxq.2	uc001qxr.2	chr12:10331557..10344402,+	C12orf59	KIRC_ctrl	KIRC_cancer	ORF_seq_similarity	TRUE	ORF is shorter
uc001qxr.2,uc001qxq.2	uc001qxq.2	uc001qxr.2	chr12:10331557..10344402,+	C12orf59	KIRC_ctrl	KIRC_cancer	signal_peptide_identified	TRUE	Signal peptide loss
uc001qxr.2,uc001qxq.2	uc001qxq.2	uc001qxr.2	chr12:10331557..10344402,+	C12orf59	KIRP_ctrl	KIRP_cancer	ORF_seq_similarity	TRUE	ORF is shorter
uc001qxr.2,uc001qxq.2	uc001qxq.2	uc001qxr.2	chr12:10331557..10344402,+	C12orf59	KIRP_ctrl	KIRP_cancer	signal_peptide_identified	TRUE	Signal peptide loss
uc001tkb.1,uc010swg.1	uc010swg.1	uc001tkb.1	chr12:104324189..104341703,+	HSP90B1	THCA_ctrl	THCA_cancer	ORF_seq_similarity	TRUE	ORF is shorter
uc001tkb.1,uc010swg.1	uc010swg.1	uc001tkb.1	chr12:104324189..104341703,+	HSP90B1	THCA_ctrl	THCA_cancer	domains_identified	TRUE	Domain loss
uc001tkb.1,uc010swg.1	uc010swg.1	uc001tkb.1	chr12:104324189..104341703,+	HSP90B1	THCA_ctrl	THCA_cancer	signal_peptide_identified	TRUE	Signal peptide loss
uc001tkd.3,uc009zuj.2	uc009zuj.2	uc001tkd.3	chr12:104343981..104359473,-	C12orf73	BRCA_ctrl	BRCA_cancer	ORF_seq_similarity	TRUE	Complete ORF gain
uc001tkd.3,uc009zuj.2	uc009zuj.2	uc001tkd.3	chr12:104343981..104359473,-	C12orf73	BRCA_ctrl	BRCA_cancer	domains_identified	TRUE	Domain gain
uc001tkd.3,uc009zuj.2	uc009zuj.2	uc001tkd.3	chr12:104343981..104359473,-	C12orf73	BRCA_ctrl	BRCA_cancer	signal_peptide_identified	TRUE	Signal peptide gain
uc001tkd.3,uc009zuj.2	uc009zuj.2	uc001tkd.3	chr12:104343981..104359473,-	C12orf73	KICH_ctrl	KICH_cancer	ORF_seq_similarity	TRUE	Complete ORF gain
uc001tkd.3,uc009zuj.2	uc009zuj.2	uc001tkd.3	chr12:104343981..104359473,-	C12orf73	KICH_ctrl	KICH_cancer	domains_identified	TRUE	Domain gain
uc001tkd.3,uc009zuj.2	uc009zuj.2	uc001tkd.3	chr12:104343981..104359473,-	C12orf73	KICH_ctrl	KICH_cancer	signal_peptide_identified	TRUE	Signal peptide gain
uc001tkd.3,uc009zuj.2	uc009zuj.2	uc001tkd.3	chr12:104343981..104359473,-	C12orf73	KIRC_ctrl	KIRC_cancer	ORF_seq_similarity	TRUE	Complete ORF gain
uc001tkd.3,uc009zuj.2	uc009zuj.2	uc001tkd.3	chr12:104343981..104359473,-	C12orf73	KIRC_ctrl	KIRC_cancer	domains_identified	TRUE	Domain gain
uc001tkd.3,uc009zuj.2	uc009zuj.2	uc001tkd.3	chr12:104343981..104359473,-	C12orf73	KIRC_ctrl	KIRC_cancer	signal_peptide_identified	TRUE	Signal peptide gain
uc001tld.2,uc010sws.1	uc010sws.1	uc001tld.2	chr12:105501492..105562904,+	KIAA1033	THCA_ctrl	THCA_cancer	ORF_seq_similarity	TRUE	ORF is shorter
uc001tml.1,uc001tmm.1	uc001tmm.1	uc001tml.1	chr12:107712197..108053419,+	BTBD11	KIRC_ctrl	KIRC_cancer	ORF_seq_similarity	TRUE	ORF is shorter
uc001tml.1,uc001tmm.1	uc001tmm.1	uc001tml.1	chr12:107712197..108053419,+	BTBD11	KIRC_ctrl	KIRC_cancer	domains_identified	TRUE	Domain loss
uc001tmk.1,uc001tmm.1	uc001tmm.1	uc001tmk.1	chr12:107712197..108053419,+	BTBD11	KIRP_ctrl	KIRP_cancer	ORF_seq_similarity	TRUE	ORF is shorter
uc001tmk.1,uc001tmm.1	uc001tmm.1	uc001tmk.1	chr12:107712197..108053419,+	BTBD11	KIRP_ctrl	KIRP_cancer	domains_identified	TRUE	Domain loss
uc001tml.1,uc001tmm.1	uc001tmm.1	uc001tml.1	chr12:107712197..108053419,+	BTBD11	KIRP_ctrl	KIRP_cancer	ORF_seq_similarity	TRUE	ORF is shorter
uc001tml.1,uc001tmm.1	uc001tmm.1	uc001tml.1	chr12:107712197..108053419,+	BTBD11	KIRP_ctrl	KIRP_cancer	domains_identified	TRUE	Domain loss
uc001qyt.2,uc001qyu.2	uc001qyu.2	uc001qyt.2	chr12:10851678..10875953,-	CSDA	KICH_ctrl	KICH_cancer	ORF_seq_similarity	TRUE	ORF is shorter
uc001qyu.2,uc001qyt.2	uc001qyt.2	uc001qyu.2	chr12:10851678..10875953,-	CSDA	LIHC_ctrl	LIHC_cancer	ORF_seq_similarity	TRUE	ORF is longer
uc001tmt.2,uc001tmu.2	uc001tmu.2	uc001tmt.2	chr12:108523511..108644311,+	WSCD2	THCA_ctrl	THCA_cancer	ORF_seq_similarity	TRUE	ORF is shorter
uc001tmt.2,uc001tmu.2	uc001tmu.2	uc001tmt.2	chr12:108523511..108644311,+	WSCD2	THCA_ctrl	THCA_cancer	domains_identified	TRUE	Domain loss
uc010sxi.1,uc001tnw.3	uc001tnw.3	uc010sxi.1	chr12:109460894..109525821,+	USP30	THCA_ctrl	THCA_cancer	ORF_seq_similarity	TRUE	ORF is shorter
uc001toc.2,uc010sxm.1	uc010sxm.1	uc001toc.2	chr12:109554400..109706028,+	ACACB	KIRC_ctrl	KIRC_cancer	ORF_seq_similarity	TRUE	ORF is shorter
uc001toc.2,uc010sxm.1	uc010sxm.1	uc001toc.2	chr12:109554400..109706028,+	ACACB	KIRC_ctrl	KIRC_cancer	domains_identified	TRUE	Domain loss
uc001toc.2,uc010sxm.1	uc010sxm.1	uc001toc.2	chr12:109554400..109706028,+	ACACB	KIRC_ctrl	KIRC_cancer	signal_peptide_identified	TRUE	Signal peptide loss
uc001toc.2,uc010sxm.1	uc010sxm.1	uc001toc.2	chr12:109554400..109706028,+	ACACB	KIRP_ctrl	KIRP_cancer	ORF_seq_similarity	TRUE	ORF is shorter
uc001toc.2,uc010sxm.1	uc010sxm.1	uc001toc.2	chr12:109554400..109706028,+	ACACB	KIRP_ctrl	KIRP_cancer	domains_identified	TRUE	Domain loss
uc001toc.2,uc010sxm.1	uc010sxm.1	uc001toc.2	chr12:109554400..109706028,+	ACACB	KIRP_ctrl	KIRP_cancer	signal_peptide_identified	TRUE	Signal peptide loss
uc001toc.2,uc010sxm.1	uc010sxm.1	uc001toc.2	chr12:109554400..109706028,+	ACACB	THCA_ctrl	THCA_cancer	ORF_seq_similarity	TRUE	ORF is shorter
uc001toc.2,uc010sxm.1	uc010sxm.1	uc001toc.2	chr12:109554400..109706028,+	ACACB	THCA_ctrl	THCA_cancer	domains_identified	TRUE	Domain loss
uc001toc.2,uc010sxm.1	uc010sxm.1	uc001toc.2	chr12:109554400..109706028,+	ACACB	THCA_ctrl	THCA_cancer	signal_peptide_identified	TRUE	Signal peptide loss
uc001qyz.3,uc009zhp.2	uc009zhp.2	uc001qyz.3	chr12:10998450..11324213,-	PRR4	BRCA_ctrl	BRCA_cancer	signal_peptide_identified	TRUE	Signal peptide loss
uc009zvk.2,uc001toz.3	uc001toz.3	uc009zvk.2	chr12:110011500..110035070,+	MVK	KIRC_ctrl	KIRC_cancer	ORF_seq_similarity	TRUE	ORF is shorter
uc009zvk.2,uc001toz.3	uc001toz.3	uc009zvk.2	chr12:110011500..110035070,+	MVK	KIRC_ctrl	KIRC_cancer	domains_identified	TRUE	Domain loss
uc009zvk.2,uc001toz.3	uc001toz.3	uc009zvk.2	chr12:110011500..110035070,+	MVK	KIRP_ctrl	KIRP_cancer	ORF_seq_similarity	TRUE	ORF is shorter
uc009zvk.2,uc001toz.3	uc001toz.3	uc009zvk.2	chr12:110011500..110035070,+	MVK	KIRP_ctrl	KIRP_cancer	domains_identified	TRUE	Domain loss
uc001qjb.2,uc001qje.2	uc001qje.2	uc001qjb.2	chr12:1100404..1605099,+	ERC1	BRCA_ctrl	BRCA_cancer	ORF_seq_similarity	TRUE	Complete ORF loss
uc001qjb.2,uc001qje.2	uc001qje.2	uc001qjb.2	chr12:1100404..1605099,+	ERC1	BRCA_ctrl	BRCA_cancer	domains_identified	TRUE	Domain loss
uc001qjb.2,uc001qje.2	uc001qje.2	uc001qjb.2	chr12:1100404..1605099,+	ERC1	KICH_ctrl	KICH_cancer	ORF_seq_similarity	TRUE	Complete ORF loss
uc001qjb.2,uc001qje.2	uc001qje.2	uc001qjb.2	chr12:1100404..1605099,+	ERC1	KICH_ctrl	KICH_cancer	domains_identified	TRUE	Domain loss
uc001tpg.1,uc001tpi.1	uc001tpi.1	uc001tpg.1	chr12:110220894..110271212,-	TRPV4	LIHC_ctrl	LIHC_cancer	intron_retention	TRUE	Intron retention gain
uc001tpg.1,uc001tpi.1	uc001tpi.1	uc001tpg.1	chr12:110220894..110271212,-	TRPV4	LIHC_ctrl	LIHC_cancer	domains_identified	TRUE	Domain loss
uc001tps.2,uc001tpr.2	uc001tpr.2	uc001tps.2	chr12:110367607..110434194,-	GIT2	KICH_ctrl	KICH_cancer	ORF_seq_similarity	TRUE	ORF is shorter
uc001tps.2,uc001tpr.2	uc001tpr.2	uc001tps.2	chr12:110367607..110434194,-	GIT2	KICH_ctrl	KICH_cancer	domains_identified	TRUE	Domain loss
uc009zvn.2,uc001tql.3	uc001tql.3	uc009zvn.2	chr12:110719032..110788895,+	ATP2A2	BRCA_ctrl	BRCA_cancer	coding_potential	TRUE	Transcript is coding
uc009zvn.2,uc001tql.3	uc001tql.3	uc009zvn.2	chr12:110719032..110788895,+	ATP2A2	BRCA_ctrl	BRCA_cancer	ORF_seq_similarity	TRUE	Complete ORF gain
uc009zvn.2,uc001tql.3	uc001tql.3	uc009zvn.2	chr12:110719032..110788895,+	ATP2A2	BRCA_ctrl	BRCA_cancer	domains_identified	TRUE	Domain gain
uc001tql.3,uc001tqk.3	uc001tqk.3	uc001tql.3	chr12:110719032..110788895,+	ATP2A2	HNSC_ctrl	HNSC_cancer	intron_retention	TRUE	Intron retention gain
uc009zvn.2,uc001tql.3	uc001tql.3	uc009zvn.2	chr12:110719032..110788895,+	ATP2A2	LUAD_ctrl	LUAD_cancer	coding_potential	TRUE	Transcript is coding
uc009zvn.2,uc001tql.3	uc001tql.3	uc009zvn.2	chr12:110719032..110788895,+	ATP2A2	LUAD_ctrl	LUAD_cancer	ORF_seq_similarity	TRUE	Complete ORF gain
uc009zvn.2,uc001tql.3	uc001tql.3	uc009zvn.2	chr12:110719032..110788895,+	ATP2A2	LUAD_ctrl	LUAD_cancer	domains_identified	TRUE	Domain gain
uc009zvn.2,uc001tql.3	uc001tql.3	uc009zvn.2	chr12:110719032..110788895,+	ATP2A2	LUSC_ctrl	LUSC_cancer	coding_potential	TRUE	Transcript is coding
uc009zvn.2,uc001tql.3	uc001tql.3	uc009zvn.2	chr12:110719032..110788895,+	ATP2A2	LUSC_ctrl	LUSC_cancer	ORF_seq_similarity	TRUE	Complete ORF gain
uc009zvn.2,uc001tql.3	uc001tql.3	uc009zvn.2	chr12:110719032..110788895,+	ATP2A2	LUSC_ctrl	LUSC_cancer	domains_identified	TRUE	Domain gain
uc001tqp.3,uc001tqo.2	uc001tqo.2	uc001tqp.3	chr12:110810705..110841535,-	ANAPC7	KICH_ctrl	KICH_cancer	ORF_seq_similarity	TRUE	ORF is longer
uc001tqp.3,uc001tqo.2	uc001tqo.2	uc001tqp.3	chr12:110810705..110841535,-	ANAPC7	KICH_ctrl	KICH_cancer	domains_identified	TRUE	Domain gain
uc001tqp.3,uc001tqo.2	uc001tqo.2	uc001tqp.3	chr12:110810705..110841535,-	ANAPC7	KIRC_ctrl	KIRC_cancer	ORF_seq_similarity	TRUE	ORF is longer
uc001tqp.3,uc001tqo.2	uc001tqo.2	uc001tqp.3	chr12:110810705..110841535,-	ANAPC7	KIRC_ctrl	KIRC_cancer	domains_identified	TRUE	Domain gain
uc001tqp.3,uc001tqo.2	uc001tqo.2	uc001tqp.3	chr12:110810705..110841535,-	ANAPC7	LUSC_ctrl	LUSC_cancer	ORF_seq_similarity	TRUE	ORF is longer
uc001tqp.3,uc001tqo.2	uc001tqo.2	uc001tqp.3	chr12:110810705..110841535,-	ANAPC7	LUSC_ctrl	LUSC_cancer	domains_identified	TRUE	Domain gain
uc001tsu.1,uc001tsv.2	uc001tsv.2	uc001tsu.1	chr12:112277573..112280706,-	C12orf47	LUSC_ctrl	LUSC_cancer	intron_retention	TRUE	Intron retention gain
uc001txh.1,uc001txj.1	uc001txj.1	uc001txh.1	chr12:120123598..120315092,-	CIT	LUSC_ctrl	LUSC_cancer	ORF_seq_similarity	TRUE	ORF is longer
uc001txh.1,uc001txj.1	uc001txj.1	uc001txh.1	chr12:120123598..120315092,-	CIT	LUSC_ctrl	LUSC_cancer	domains_identified	TRUE	Domain gain
uc001tzu.2,uc001tzz.1	uc001tzz.1	uc001tzu.2	chr12:121675496..121736111,-	CAMKK2	PRAD_ctrl	PRAD_cancer	intron_retention	TRUE	Intron retention switch
uc001tzu.2,uc001tzz.1	uc001tzz.1	uc001tzu.2	chr12:121675496..121736111,-	CAMKK2	PRAD_ctrl	PRAD_cancer	ORF_seq_similarity	TRUE	ORF is shorter
uc001uag.2,uc010szv.1	uc010szv.1	uc001uag.2	chr12:121746050..121792012,-	ANAPC5	KIRP_ctrl	KIRP_cancer	ORF_seq_similarity	TRUE	ORF is shorter
uc001uag.2,uc010szv.1	uc010szv.1	uc001uag.2	chr12:121746050..121792012,-	ANAPC5	KIRP_ctrl	KIRP_cancer	domains_identified	TRUE	Domain loss
uc001uat.2,uc010szy.1	uc010szy.1	uc001uat.2	chr12:121866902..122018920,-	KDM2B	LUSC_ctrl	LUSC_cancer	ORF_seq_similarity	TRUE	ORF is shorter
uc001uat.2,uc010szy.1	uc010szy.1	uc001uat.2	chr12:121866902..122018920,-	KDM2B	LUSC_ctrl	LUSC_cancer	domains_identified	TRUE	Domain switch
uc001ube.3,uc001ubf.2	uc001ubf.2	uc001ube.3	chr12:122233174..122241390,-	LOC338799	KICH_ctrl	KICH_cancer	intron_retention	TRUE	Intron retention gain
uc001ube.3,uc001ubf.2	uc001ubf.2	uc001ube.3	chr12:122233174..122241390,-	LOC338799	KICH_ctrl	KICH_cancer	coding_potential	TRUE	Transcript is coding
uc001ube.3,uc001ubf.2	uc001ubf.2	uc001ube.3	chr12:122233174..122241390,-	LOC338799	KICH_ctrl	KICH_cancer	ORF_seq_similarity	TRUE	Complete ORF gain
uc001ube.3,uc001ubf.2	uc001ubf.2	uc001ube.3	chr12:122233174..122241390,-	LOC338799	KIRC_ctrl	KIRC_cancer	intron_retention	TRUE	Intron retention gain
uc001ube.3,uc001ubf.2	uc001ubf.2	uc001ube.3	chr12:122233174..122241390,-	LOC338799	KIRC_ctrl	KIRC_cancer	coding_potential	TRUE	Transcript is coding
uc001ube.3,uc001ubf.2	uc001ubf.2	uc001ube.3	chr12:122233174..122241390,-	LOC338799	KIRC_ctrl	KIRC_cancer	ORF_seq_similarity	TRUE	Complete ORF gain
uc001ubt.2,uc001ubr.2	uc001ubr.2	uc001ubt.2	chr12:122516760..122628965,+	MLXIP	KICH_ctrl	KICH_cancer	ORF_seq_similarity	TRUE	ORF is shorter
uc001ubt.2,uc001ubr.2	uc001ubr.2	uc001ubt.2	chr12:122516760..122628965,+	MLXIP	KICH_ctrl	KICH_cancer	domains_identified	TRUE	Domain loss
uc001ubt.2,uc001ubr.2	uc001ubr.2	uc001ubt.2	chr12:122516760..122628965,+	MLXIP	LUSC_ctrl	LUSC_cancer	ORF_seq_similarity	TRUE	ORF is shorter
uc001ubt.2,uc001ubr.2	uc001ubr.2	uc001ubt.2	chr12:122516760..122628965,+	MLXIP	LUSC_ctrl	LUSC_cancer	domains_identified	TRUE	Domain loss
uc001uci.1,uc001ucf.1	uc001ucf.1	uc001uci.1	chr12:122755981..122907116,-	CLIP1	KIRC_ctrl	KIRC_cancer	ORF_seq_similarity	TRUE	ORF is shorter
uc001uci.1,uc001ucf.1	uc001ucf.1	uc001uci.1	chr12:122755981..122907116,-	CLIP1	KIRC_ctrl	KIRC_cancer	domains_identified	TRUE	Domain loss
uc001uci.1,uc001ucf.1	uc001ucf.1	uc001uci.1	chr12:122755981..122907116,-	CLIP1	THCA_ctrl	THCA_cancer	ORF_seq_similarity	TRUE	ORF is shorter
uc001uci.1,uc001ucf.1	uc001ucf.1	uc001uci.1	chr12:122755981..122907116,-	CLIP1	THCA_ctrl	THCA_cancer	domains_identified	TRUE	Domain loss
uc001uew.2,uc001uex.2	uc001uex.2	uc001uew.2	chr12:123868704..123893898,+	SETD8	THCA_ctrl	THCA_cancer	ORF_seq_similarity	TRUE	ORF is shorter
uc001uhc.2,uc009zyh.2	uc009zyh.2	uc001uhc.2	chr12:125549925..125627872,+	AACS	KIRC_ctrl	KIRC_cancer	ORF_seq_similarity	TRUE	Complete ORF loss
uc001uhc.2,uc009zyh.2	uc009zyh.2	uc001uhc.2	chr12:125549925..125627872,+	AACS	KIRC_ctrl	KIRC_cancer	domains_identified	TRUE	Domain loss
uc001uhc.2,uc009zyh.2	uc009zyh.2	uc001uhc.2	chr12:125549925..125627872,+	AACS	KIRP_ctrl	KIRP_cancer	ORF_seq_similarity	TRUE	Complete ORF loss
uc001uhc.2,uc009zyh.2	uc009zyh.2	uc001uhc.2	chr12:125549925..125627872,+	AACS	KIRP_ctrl	KIRP_cancer	domains_identified	TRUE	Domain loss
uc001uhc.2,uc009zyh.2	uc009zyh.2	uc001uhc.2	chr12:125549925..125627872,+	AACS	THCA_ctrl	THCA_cancer	ORF_seq_similarity	TRUE	Complete ORF loss
uc001uhc.2,uc009zyh.2	uc009zyh.2	uc001uhc.2	chr12:125549925..125627872,+	AACS	THCA_ctrl	THCA_cancer	domains_identified	TRUE	Domain loss
uc001raw.3,uc001rau.3	uc001rau.3	uc001raw.3	chr12:12878851..12944397,+	APOLD1	STAD_ctrl	STAD_cancer	ORF_seq_similarity	TRUE	ORF is longer
uc010tbh.1,uc001uhx.1	uc001uhx.1	uc010tbh.1	chr12:129338081..129469509,+	GLT1D1	LIHC_ctrl	LIHC_cancer	ORF_seq_similarity	TRUE	ORF is shorter
uc001uit.3,uc009zyo.2	uc009zyo.2	uc001uit.3	chr12:131438452..131626006,+	GPR133	LUSC_ctrl	LUSC_cancer	ORF_seq_similarity	TRUE	ORF is shorter
uc001uit.3,uc009zyo.2	uc009zyo.2	uc001uit.3	chr12:131438452..131626006,+	GPR133	LUSC_ctrl	LUSC_cancer	domains_identified	TRUE	Domain loss
uc001ukb.2,uc001uka.2	uc001uka.2	uc001ukb.2	chr12:132680918..132905905,-	GALNT9	THCA_ctrl	THCA_cancer	ORF_seq_similarity	TRUE	ORF is shorter
uc001ukb.2,uc001uka.2	uc001uka.2	uc001ukb.2	chr12:132680918..132905905,-	GALNT9	THCA_ctrl	THCA_cancer	domains_identified	TRUE	Domain loss
uc001ulj.2,uc001ulk.1	uc001ulk.1	uc001ulj.2	chr12:133498048..133532868,-	ZNF605	KIRC_ctrl	KIRC_cancer	coding_potential	TRUE	Transcript is Noncoding
uc001ulj.2,uc001ulk.1	uc001ulk.1	uc001ulj.2	chr12:133498048..133532868,-	ZNF605	KIRC_ctrl	KIRC_cancer	ORF_seq_similarity	TRUE	Complete ORF loss
uc001ulj.2,uc001ulk.1	uc001ulk.1	uc001ulj.2	chr12:133498048..133532868,-	ZNF605	KIRC_ctrl	KIRC_cancer	domains_identified	TRUE	Domain loss
uc001rcq.1,uc001rcp.1	uc001rcp.1	uc001rcq.1	chr12:15094950..15114562,-	ARHGDIB	KIRP_ctrl	KIRP_cancer	coding_potential	TRUE	Transcript is Noncoding
uc001rcq.1,uc001rcp.1	uc001rcp.1	uc001rcq.1	chr12:15094950..15114562,-	ARHGDIB	KIRP_ctrl	KIRP_cancer	ORF_seq_similarity	TRUE	Complete ORF loss
uc001rcq.1,uc001rcp.1	uc001rcp.1	uc001rcq.1	chr12:15094950..15114562,-	ARHGDIB	KIRP_ctrl	KIRP_cancer	domains_identified	TRUE	Domain loss
uc001rcw.1,uc001rcz.1	uc001rcz.1	uc001rcw.1	chr12:15475487..15750335,+	PTPRO	KIRC_ctrl	KIRC_cancer	ORF_seq_similarity	TRUE	ORF is shorter
uc001rcw.1,uc001rcz.1	uc001rcz.1	uc001rcw.1	chr12:15475487..15750335,+	PTPRO	KIRC_ctrl	KIRC_cancer	domains_identified	TRUE	Domain loss
uc001rcw.1,uc001rcz.1	uc001rcz.1	uc001rcw.1	chr12:15475487..15750335,+	PTPRO	KIRC_ctrl	KIRC_cancer	signal_peptide_identified	TRUE	Signal peptide loss
uc009zif.2,uc010shv.1	uc010shv.1	uc009zif.2	chr12:15773076..15942510,-	EPS8	KICH_ctrl	KICH_cancer	ORF_seq_similarity	TRUE	ORF is shorter
uc009zif.2,uc010shv.1	uc010shv.1	uc009zif.2	chr12:15773076..15942510,-	EPS8	KICH_ctrl	KICH_cancer	domains_identified	TRUE	Domain loss
uc009zif.2,uc010shv.1	uc010shv.1	uc009zif.2	chr12:15773076..15942510,-	EPS8	LUSC_ctrl	LUSC_cancer	ORF_seq_similarity	TRUE	ORF is shorter
uc009zif.2,uc010shv.1	uc010shv.1	uc009zif.2	chr12:15773076..15942510,-	EPS8	LUSC_ctrl	LUSC_cancer	domains_identified	TRUE	Domain loss
uc001rdz.3,uc009zio.2	uc009zio.2	uc001rdz.3	chr12:19282648..19529331,+	PLEKHA5	KIRC_ctrl	KIRC_cancer	ORF_seq_similarity	TRUE	ORF is longer
uc001rdz.3,uc009zio.2	uc009zio.2	uc001rdz.3	chr12:19282648..19529331,+	PLEKHA5	KIRC_ctrl	KIRC_cancer	domains_identified	TRUE	Domain loss
uc001rdz.3,uc009zio.2	uc009zio.2	uc001rdz.3	chr12:19282648..19529331,+	PLEKHA5	KIRP_ctrl	KIRP_cancer	ORF_seq_similarity	TRUE	ORF is longer
uc001rdz.3,uc009zio.2	uc009zio.2	uc001rdz.3	chr12:19282648..19529331,+	PLEKHA5	KIRP_ctrl	KIRP_cancer	domains_identified	TRUE	Domain loss
uc001reb.2,uc009zio.2	uc009zio.2	uc001reb.2	chr12:19282648..19529331,+	PLEKHA5	KIRP_ctrl	KIRP_cancer	ORF_seq_similarity	TRUE	ORF is shorter
uc001reb.2,uc009zio.2	uc009zio.2	uc001reb.2	chr12:19282648..19529331,+	PLEKHA5	KIRP_ctrl	KIRP_cancer	domains_identified	TRUE	Domain loss
uc001rgh.2,uc010sjd.1	uc010sjd.1	uc001rgh.2	chr12:25205241..25261268,+	LRMP	KIRP_ctrl	KIRP_cancer	ORF_seq_similarity	TRUE	ORF is shorter
uc001rgh.2,uc010sjd.1	uc010sjd.1	uc001rgh.2	chr12:25205241..25261268,+	LRMP	LUSC_ctrl	LUSC_cancer	ORF_seq_similarity	TRUE	ORF is shorter
uc001rhe.2,uc001rhd.2	uc001rhd.2	uc001rhe.2	chr12:26348269..26405853,+	SSPN	KICH_ctrl	KICH_cancer	ORF_seq_similarity	TRUE	ORF is shorter
uc001rhe.2,uc001rhd.2	uc001rhd.2	uc001rhe.2	chr12:26348269..26405853,+	SSPN	KIRC_ctrl	KIRC_cancer	ORF_seq_similarity	TRUE	ORF is shorter
uc001rhe.2,uc001rhd.2	uc001rhd.2	uc001rhe.2	chr12:26348269..26405853,+	SSPN	STAD_ctrl	STAD_cancer	ORF_seq_similarity	TRUE	ORF is shorter
uc001rhe.2,uc001rhd.2	uc001rhd.2	uc001rhe.2	chr12:26348269..26405853,+	SSPN	THCA_ctrl	THCA_cancer	ORF_seq_similarity	TRUE	ORF is shorter
uc001rhm.2,uc001rhn.2	uc001rhn.2	uc001rhm.2	chr12:27091316..27118862,+	FGFR1OP2	LUAD_ctrl	LUAD_cancer	ORF_seq_similarity	TRUE	ORF is shorter
uc001rhm.2,uc001rhn.2	uc001rhn.2	uc001rhm.2	chr12:27091316..27118862,+	FGFR1OP2	LUAD_ctrl	LUAD_cancer	domains_identified	TRUE	Domain loss
uc001rhm.2,uc001rhn.2	uc001rhn.2	uc001rhm.2	chr12:27091316..27118862,+	FGFR1OP2	LUSC_ctrl	LUSC_cancer	ORF_seq_similarity	TRUE	ORF is shorter
uc001rhm.2,uc001rhn.2	uc001rhn.2	uc001rhm.2	chr12:27091316..27118862,+	FGFR1OP2	LUSC_ctrl	LUSC_cancer	domains_identified	TRUE	Domain loss
uc001rhs.2,uc001rhr.2	uc001rhr.2	uc001rhs.2	chr12:27397078..27478888,+	STK38L	LUSC_ctrl	LUSC_cancer	ORF_seq_similarity	TRUE	Complete ORF gain
uc001rhs.2,uc001rhr.2	uc001rhr.2	uc001rhs.2	chr12:27397078..27478888,+	STK38L	LUSC_ctrl	LUSC_cancer	domains_identified	TRUE	Domain gain
uc001ria.2,uc001rif.1	uc001rif.1	uc001ria.2	chr12:27677045..27848496,+	PPFIBP1	KIRC_ctrl	KIRC_cancer	ORF_seq_similarity	TRUE	ORF is shorter
uc001rja.2,uc001riy.2	uc001riy.2	uc001rja.2	chr12:29653759..29937692,-	TMTC1	KICH_ctrl	KICH_cancer	ORF_seq_similarity	TRUE	ORF is shorter
uc001rja.2,uc001riy.2	uc001riy.2	uc001rja.2	chr12:29653759..29937692,-	TMTC1	KICH_ctrl	KICH_cancer	domains_identified	TRUE	Domain loss
uc001qib.2,uc001qhx.2	uc001qhx.2	uc001qib.2	chr12:299250..323371,-	SLC6A12	KICH_ctrl	KICH_cancer	ORF_seq_similarity	TRUE	ORF is shorter
uc001qib.2,uc001qhy.2	uc001qhy.2	uc001qib.2	chr12:299250..323371,-	SLC6A12	KICH_ctrl	KICH_cancer	ORF_seq_similarity	TRUE	ORF is shorter
uc001rke.2,uc010skb.1	uc010skb.1	uc001rke.2	chr12:31433527..31479159,-	FAM60A	KICH_ctrl	KICH_cancer	coding_potential	TRUE	Transcript is Noncoding
uc001rke.2,uc010skb.1	uc010skb.1	uc001rke.2	chr12:31433527..31479159,-	FAM60A	KICH_ctrl	KICH_cancer	ORF_seq_similarity	TRUE	Complete ORF loss
uc001rke.2,uc010skb.1	uc010skb.1	uc001rke.2	chr12:31433527..31479159,-	FAM60A	KICH_ctrl	KICH_cancer	domains_identified	TRUE	Domain loss
uc010sjz.1,uc010skb.1	uc010skb.1	uc010sjz.1	chr12:31433527..31479159,-	FAM60A	KIRC_ctrl	KIRC_cancer	coding_potential	TRUE	Transcript is Noncoding
uc010sjz.1,uc010skb.1	uc010skb.1	uc010sjz.1	chr12:31433527..31479159,-	FAM60A	KIRC_ctrl	KIRC_cancer	ORF_seq_similarity	TRUE	Complete ORF loss
uc010sjz.1,uc010skb.1	uc010skb.1	uc010sjz.1	chr12:31433527..31479159,-	FAM60A	KIRC_ctrl	KIRC_cancer	domains_identified	TRUE	Domain loss
uc010sjz.1,uc010skb.1	uc010skb.1	uc010sjz.1	chr12:31433527..31479159,-	FAM60A	KIRP_ctrl	KIRP_cancer	coding_potential	TRUE	Transcript is Noncoding
uc010sjz.1,uc010skb.1	uc010skb.1	uc010sjz.1	chr12:31433527..31479159,-	FAM60A	KIRP_ctrl	KIRP_cancer	ORF_seq_similarity	TRUE	Complete ORF loss
uc010sjz.1,uc010skb.1	uc010skb.1	uc010sjz.1	chr12:31433527..31479159,-	FAM60A	KIRP_ctrl	KIRP_cancer	domains_identified	TRUE	Domain loss
uc010sjz.1,uc010skb.1	uc010skb.1	uc010sjz.1	chr12:31433527..31479159,-	FAM60A	PRAD_ctrl	PRAD_cancer	coding_potential	TRUE	Transcript is Noncoding
uc010sjz.1,uc010skb.1	uc010skb.1	uc010sjz.1	chr12:31433527..31479159,-	FAM60A	PRAD_ctrl	PRAD_cancer	ORF_seq_similarity	TRUE	Complete ORF loss
uc010sjz.1,uc010skb.1	uc010skb.1	uc010sjz.1	chr12:31433527..31479159,-	FAM60A	PRAD_ctrl	PRAD_cancer	domains_identified	TRUE	Domain loss
uc010sjz.1,uc010skb.1	uc010skb.1	uc010sjz.1	chr12:31433527..31479159,-	FAM60A	THCA_ctrl	THCA_cancer	coding_potential	TRUE	Transcript is Noncoding
uc010sjz.1,uc010skb.1	uc010skb.1	uc010sjz.1	chr12:31433527..31479159,-	FAM60A	THCA_ctrl	THCA_cancer	ORF_seq_similarity	TRUE	Complete ORF loss
uc010sjz.1,uc010skb.1	uc010skb.1	uc010sjz.1	chr12:31433527..31479159,-	FAM60A	THCA_ctrl	THCA_cancer	domains_identified	TRUE	Domain loss
uc001rki.1,uc001rkk.1	uc001rkk.1	uc001rki.1	chr12:31535157..31743952,-	DENND5B	COAD_ctrl	COAD_cancer	ORF_seq_similarity	TRUE	ORF is shorter
uc001rki.1,uc001rkk.1	uc001rkk.1	uc001rki.1	chr12:31535157..31743952,-	DENND5B	COAD_ctrl	COAD_cancer	domains_identified	TRUE	Domain loss
uc001rki.1,uc001rkk.1	uc001rkk.1	uc001rki.1	chr12:31535157..31743952,-	DENND5B	KIRP_ctrl	KIRP_cancer	ORF_seq_similarity	TRUE	ORF is shorter
uc001rki.1,uc001rkk.1	uc001rkk.1	uc001rki.1	chr12:31535157..31743952,-	DENND5B	KIRP_ctrl	KIRP_cancer	domains_identified	TRUE	Domain loss
uc001rkq.3,uc009zjs.2	uc009zjs.2	uc001rkq.3	chr12:31824073..31882108,-	AMN1	KIRP_ctrl	KIRP_cancer	coding_potential	TRUE	Transcript is Noncoding
uc001rkq.3,uc009zjs.2	uc009zjs.2	uc001rkq.3	chr12:31824073..31882108,-	AMN1	KIRP_ctrl	KIRP_cancer	ORF_seq_similarity	TRUE	Complete ORF loss
uc001rkq.3,uc009zjs.2	uc009zjs.2	uc001rkq.3	chr12:31824073..31882108,-	AMN1	KIRP_ctrl	KIRP_cancer	domains_identified	TRUE	Domain loss
uc001rks.2,uc001rkt.2	uc001rkt.2	uc001rks.2	chr12:32112353..32146031,+	C12orf35	STAD_ctrl	STAD_cancer	coding_potential	TRUE	Transcript is Noncoding
uc001rks.2,uc001rkt.2	uc001rkt.2	uc001rks.2	chr12:32112353..32146031,+	C12orf35	STAD_ctrl	STAD_cancer	ORF_seq_similarity	TRUE	Complete ORF loss
uc001rks.2,uc001rkt.2	uc001rkt.2	uc001rks.2	chr12:32112353..32146031,+	C12orf35	STAD_ctrl	STAD_cancer	domains_identified	TRUE	Domain loss
uc001rks.2,uc001rkt.2	uc001rkt.2	uc001rks.2	chr12:32112353..32146031,+	C12orf35	THCA_ctrl	THCA_cancer	coding_potential	TRUE	Transcript is Noncoding
uc001rks.2,uc001rkt.2	uc001rkt.2	uc001rks.2	chr12:32112353..32146031,+	C12orf35	THCA_ctrl	THCA_cancer	ORF_seq_similarity	TRUE	Complete ORF loss
uc001rks.2,uc001rkt.2	uc001rkt.2	uc001rks.2	chr12:32112353..32146031,+	C12orf35	THCA_ctrl	THCA_cancer	domains_identified	TRUE	Domain loss
uc001qid.1,uc001qic.1	uc001qic.1	uc001qid.1	chr12:329791..372002,-	SLC6A13	KIRC_ctrl	KIRC_cancer	coding_potential	TRUE	Transcript is coding
uc001qid.1,uc001qic.1	uc001qic.1	uc001qid.1	chr12:329791..372002,-	SLC6A13	KIRC_ctrl	KIRC_cancer	ORF_seq_similarity	TRUE	ORF is longer
uc001qid.1,uc010sdl.1	uc010sdl.1	uc001qid.1	chr12:329791..372002,-	SLC6A13	KIRC_ctrl	KIRC_cancer	coding_potential	TRUE	Transcript is coding
uc001qid.1,uc010sdl.1	uc010sdl.1	uc001qid.1	chr12:329791..372002,-	SLC6A13	KIRC_ctrl	KIRC_cancer	ORF_seq_similarity	TRUE	ORF is longer
uc001qid.1,uc010sdl.1	uc010sdl.1	uc001qid.1	chr12:329791..372002,-	SLC6A13	KIRC_ctrl	KIRC_cancer	domains_identified	TRUE	Domain gain
uc001qid.1,uc010sdl.1	uc010sdl.1	uc001qid.1	chr12:329791..372002,-	SLC6A13	KIRP_ctrl	KIRP_cancer	coding_potential	TRUE	Transcript is coding
uc001qid.1,uc010sdl.1	uc010sdl.1	uc001qid.1	chr12:329791..372002,-	SLC6A13	KIRP_ctrl	KIRP_cancer	ORF_seq_similarity	TRUE	ORF is longer
uc001qid.1,uc010sdl.1	uc010sdl.1	uc001qid.1	chr12:329791..372002,-	SLC6A13	KIRP_ctrl	KIRP_cancer	domains_identified	TRUE	Domain gain
uc001qmi.1,uc010seo.1	uc010seo.1	uc001qmi.1	chr12:3716318..3862366,-	EFCAB4B	HNSC_ctrl	HNSC_cancer	ORF_seq_similarity	TRUE	Complete ORF gain
uc001qmi.1,uc010seo.1	uc010seo.1	uc001qmi.1	chr12:3716318..3862366,-	EFCAB4B	HNSC_ctrl	HNSC_cancer	domains_identified	TRUE	Domain gain
uc010skl.1,uc001rlu.2	uc001rlu.2	uc010skl.1	chr12:39687031..39836918,-	KIF21A	THCA_ctrl	THCA_cancer	ORF_seq_similarity	TRUE	ORF is shorter
uc010skl.1,uc001rlu.2	uc001rlu.2	uc010skl.1	chr12:39687031..39836918,-	KIF21A	THCA_ctrl	THCA_cancer	domains_identified	TRUE	Domain switch
uc001rmg.3,uc009zjw.2	uc009zjw.2	uc001rmg.3	chr12:40618813..40763084,+	LRRK2	KIRC_ctrl	KIRC_cancer	ORF_seq_similarity	TRUE	ORF is shorter
uc001rmg.3,uc009zjw.2	uc009zjw.2	uc001rmg.3	chr12:40618813..40763084,+	LRRK2	KIRC_ctrl	KIRC_cancer	domains_identified	TRUE	Domain loss
uc001rnc.2,uc001rnd.2	uc001rnd.2	uc001rnc.2	chr12:42632249..42853517,+	PPHLN1	KICH_ctrl	KICH_cancer	ORF_seq_similarity	TRUE	ORF is shorter
uc001rod.2,uc001roe.2	uc001roe.2	uc001rod.2	chr12:44229962..44783540,+	TMEM117	BRCA_ctrl	BRCA_cancer	ORF_seq_similarity	TRUE	ORF is shorter
uc001ros.1,uc001rou.1	uc001rou.1	uc001ros.1	chr12:46123620..46301819,+	ARID2	KIRP_ctrl	KIRP_cancer	ORF_seq_similarity	TRUE	ORF is shorter
uc001ros.1,uc001rou.1	uc001rou.1	uc001ros.1	chr12:46123620..46301819,+	ARID2	KIRP_ctrl	KIRP_cancer	domains_identified	TRUE	Domain loss
uc001ros.1,uc001rou.1	uc001rou.1	uc001ros.1	chr12:46123620..46301819,+	ARID2	THCA_ctrl	THCA_cancer	ORF_seq_similarity	TRUE	ORF is shorter
uc001ros.1,uc001rou.1	uc001rou.1	uc001ros.1	chr12:46123620..46301819,+	ARID2	THCA_ctrl	THCA_cancer	domains_identified	TRUE	Domain loss
uc001rpg.2,uc010sli.1	uc010sli.1	uc001rpg.2	chr12:46751972..46766645,-	SLC38A2	THCA_ctrl	THCA_cancer	ORF_seq_similarity	TRUE	ORF is shorter
uc001qnc.2,uc010ses.1	uc010ses.1	uc001qnc.2	chr12:4758283..4796397,+	NDUFA9	KIRP_ctrl	KIRP_cancer	ORF_seq_similarity	TRUE	ORF is shorter
uc001qnc.2,uc010ses.1	uc010ses.1	uc001qnc.2	chr12:4758283..4796397,+	NDUFA9	KIRP_ctrl	KIRP_cancer	domains_identified	TRUE	Domain loss
uc001rpz.3,uc001rqa.2	uc001rqa.2	uc001rpz.3	chr12:48128455..48164823,-	RAPGEF3	KICH_ctrl	KICH_cancer	coding_potential	TRUE	Transcript is Noncoding
uc001rpz.3,uc001rqa.2	uc001rqa.2	uc001rpz.3	chr12:48128455..48164823,-	RAPGEF3	KICH_ctrl	KICH_cancer	ORF_seq_similarity	TRUE	ORF is shorter
uc001rpz.3,uc001rqa.2	uc001rqa.2	uc001rpz.3	chr12:48128455..48164823,-	RAPGEF3	KICH_ctrl	KICH_cancer	domains_identified	TRUE	Domain loss
uc009zkz.1,uc001rse.1	uc001rse.1	uc009zkz.1	chr12:49086752..49110781,-	CCNT1	COAD_ctrl	COAD_cancer	ORF_seq_similarity	TRUE	ORF is longer
uc009zkz.1,uc001rse.1	uc001rse.1	uc009zkz.1	chr12:49086752..49110781,-	CCNT1	COAD_ctrl	COAD_cancer	domains_identified	TRUE	Domain gain
uc009zkz.1,uc001rse.1	uc001rse.1	uc009zkz.1	chr12:49086752..49110781,-	CCNT1	LUAD_ctrl	LUAD_cancer	ORF_seq_similarity	TRUE	ORF is longer
uc009zkz.1,uc001rse.1	uc001rse.1	uc009zkz.1	chr12:49086752..49110781,-	CCNT1	LUAD_ctrl	LUAD_cancer	domains_identified	TRUE	Domain gain
uc009zkz.1,uc001rse.1	uc001rse.1	uc009zkz.1	chr12:49086752..49110781,-	CCNT1	LUSC_ctrl	LUSC_cancer	ORF_seq_similarity	TRUE	ORF is longer
uc009zkz.1,uc001rse.1	uc001rse.1	uc009zkz.1	chr12:49086752..49110781,-	CCNT1	LUSC_ctrl	LUSC_cancer	domains_identified	TRUE	Domain gain
uc001ruw.1,uc001ruu.1	uc001ruu.1	uc001ruw.1	chr12:50031724..50101197,-	FMNL3	COAD_ctrl	COAD_cancer	ORF_seq_similarity	TRUE	ORF is shorter
uc001ruw.1,uc001ruv.1	uc001ruv.1	uc001ruw.1	chr12:50031724..50101197,-	FMNL3	STAD_ctrl	STAD_cancer	domains_identified	TRUE	Domain gain
uc009zlk.2,uc001rvc.3	uc001rvc.3	uc009zlk.2	chr12:50184929..50222208,-	NCKAP5L	STAD_ctrl	STAD_cancer	intron_retention	TRUE	Intron retention loss
uc009zlk.2,uc001rvc.3	uc001rvc.3	uc009zlk.2	chr12:50184929..50222208,-	NCKAP5L	STAD_ctrl	STAD_cancer	ORF_seq_similarity	TRUE	ORF is shorter
uc009zlk.2,uc001rvc.3	uc001rvc.3	uc009zlk.2	chr12:50184929..50222208,-	NCKAP5L	THCA_ctrl	THCA_cancer	intron_retention	TRUE	Intron retention loss
uc009zlk.2,uc001rvc.3	uc001rvc.3	uc009zlk.2	chr12:50184929..50222208,-	NCKAP5L	THCA_ctrl	THCA_cancer	ORF_seq_similarity	TRUE	ORF is shorter
uc001rwj.3,uc001rwh.3	uc001rwh.3	uc001rwj.3	chr12:50569565..50677353,-	LIMA1	HNSC_ctrl	HNSC_cancer	ORF_seq_similarity	TRUE	ORF is shorter
uc001rwj.3,uc001rwh.3	uc001rwh.3	uc001rwj.3	chr12:50569565..50677353,-	LIMA1	KICH_ctrl	KICH_cancer	ORF_seq_similarity	TRUE	ORF is shorter
uc001rwj.3,uc001rwh.3	uc001rwh.3	uc001rwj.3	chr12:50569565..50677353,-	LIMA1	KIRC_ctrl	KIRC_cancer	ORF_seq_similarity	TRUE	ORF is shorter
uc001rwj.3,uc001rwh.3	uc001rwh.3	uc001rwj.3	chr12:50569565..50677353,-	LIMA1	KIRP_ctrl	KIRP_cancer	ORF_seq_similarity	TRUE	ORF is shorter
uc001rwj.3,uc001rwh.3	uc001rwh.3	uc001rwj.3	chr12:50569565..50677353,-	LIMA1	LUSC_ctrl	LUSC_cancer	ORF_seq_similarity	TRUE	ORF is shorter
uc001rwj.3,uc001rwi.3	uc001rwi.3	uc001rwj.3	chr12:50569565..50677353,-	LIMA1	LUSC_ctrl	LUSC_cancer	ORF_seq_similarity	TRUE	ORF is shorter
uc001rwp.1,uc001rwt.1	uc001rwt.1	uc001rwp.1	chr12:50794650..50873788,+	LARP4	COAD_ctrl	COAD_cancer	ORF_seq_similarity	TRUE	ORF is shorter
uc001rwp.1,uc001rwt.1	uc001rwt.1	uc001rwp.1	chr12:50794650..50873788,+	LARP4	COAD_ctrl	COAD_cancer	domains_identified	TRUE	Domain loss
uc001rwp.1,uc001rwt.1	uc001rwt.1	uc001rwp.1	chr12:50794650..50873788,+	LARP4	THCA_ctrl	THCA_cancer	ORF_seq_similarity	TRUE	ORF is shorter
uc001rwp.1,uc001rwt.1	uc001rwt.1	uc001rwp.1	chr12:50794650..50873788,+	LARP4	THCA_ctrl	THCA_cancer	domains_identified	TRUE	Domain loss
uc001rwv.2,uc009zlt.2	uc009zlt.2	uc001rwv.2	chr12:50898768..51142448,+	DIP2B	THCA_ctrl	THCA_cancer	ORF_seq_similarity	TRUE	ORF is shorter
uc001rwv.2,uc009zlt.2	uc009zlt.2	uc001rwv.2	chr12:50898768..51142448,+	DIP2B	THCA_ctrl	THCA_cancer	domains_identified	TRUE	Domain loss
uc001rxj.1,uc001rxg.1	uc001rxg.1	uc001rxj.1	chr12:51373319..51422058,-	SLC11A2	KIRC_ctrl	KIRC_cancer	ORF_seq_similarity	TRUE	ORF is shorter
uc001rxj.1,uc001rxg.1	uc001rxg.1	uc001rxj.1	chr12:51373319..51422058,-	SLC11A2	KIRP_ctrl	KIRP_cancer	ORF_seq_similarity	TRUE	ORF is shorter
uc001rxj.1,uc001rxg.1	uc001rxg.1	uc001rxj.1	chr12:51373319..51422058,-	SLC11A2	THCA_ctrl	THCA_cancer	ORF_seq_similarity	TRUE	ORF is shorter
uc001rzj.2,uc010snm.1	uc010snm.1	uc001rzj.2	chr12:52301202..52317144,+	ACVRL1	KIRP_ctrl	KIRP_cancer	ORF_seq_similarity	TRUE	ORF is shorter
uc001rzj.2,uc010snm.1	uc010snm.1	uc001rzj.2	chr12:52301202..52317144,+	ACVRL1	KIRP_ctrl	KIRP_cancer	domains_identified	TRUE	Domain loss
uc001rzt.2,uc009zmc.2	uc009zmc.2	uc001rzt.2	chr12:52416616..52453285,+	NR4A1	KIRP_ctrl	KIRP_cancer	ORF_seq_similarity	TRUE	ORF is shorter
uc001rzt.2,uc009zmc.2	uc009zmc.2	uc001rzt.2	chr12:52416616..52453285,+	NR4A1	KIRP_ctrl	KIRP_cancer	domains_identified	TRUE	Domain loss
uc001sbw.2,uc001sby.2	uc001sby.2	uc001sbw.2	chr12:53551448..53575135,-	CSAD	LIHC_ctrl	LIHC_cancer	ORF_seq_similarity	TRUE	ORF is longer
uc009zmv.2,uc001scc.2	uc001scc.2	uc009zmv.2	chr12:53585108..53601000,-	ITGB7	KIRC_ctrl	KIRC_cancer	domains_identified	TRUE	Domain loss
uc009zmv.2,uc001scc.2	uc001scc.2	uc009zmv.2	chr12:53585108..53601000,-	ITGB7	KIRC_ctrl	KIRC_cancer	signal_peptide_identified	TRUE	Signal peptide loss
uc010soe.1,uc001sck.2	uc001sck.2	uc010soe.1	chr12:53662083..53687427,+	ESPL1	STAD_ctrl	STAD_cancer	ORF_seq_similarity	TRUE	ORF is longer
uc010soe.1,uc001sck.2	uc001sck.2	uc010soe.1	chr12:53662083..53687427,+	ESPL1	STAD_ctrl	STAD_cancer	domains_identified	TRUE	Domain gain
uc001sdz.2,uc001seb.3	uc001seb.3	uc001sdz.2	chr12:53901640..54020199,-	ATF7	BRCA_ctrl	BRCA_cancer	coding_potential	TRUE	Transcript is Noncoding
uc001sdz.2,uc001seb.3	uc001seb.3	uc001sdz.2	chr12:53901640..54020199,-	ATF7	BRCA_ctrl	BRCA_cancer	ORF_seq_similarity	TRUE	ORF is shorter
uc001sdz.2,uc001seb.3	uc001seb.3	uc001sdz.2	chr12:53901640..54020199,-	ATF7	BRCA_ctrl	BRCA_cancer	domains_identified	TRUE	Domain loss
uc001sef.2,uc001seh.2	uc001seh.2	uc001sef.2	chr12:54104903..54121307,-	CALCOCO1	KIRP_ctrl	KIRP_cancer	intron_retention	TRUE	Intron retention gain
uc001sef.2,uc001seh.2	uc001seh.2	uc001sef.2	chr12:54104903..54121307,-	CALCOCO1	LUAD_ctrl	LUAD_cancer	intron_retention	TRUE	Intron retention gain
uc001sef.2,uc001see.2	uc001see.2	uc001sef.2	chr12:54104903..54121307,-	CALCOCO1	STAD_ctrl	STAD_cancer	ORF_seq_similarity	TRUE	ORF is shorter
uc001sev.2,uc001ses.2	uc001ses.2	uc001sev.2	chr12:54410642..54424606,+	HOXC6	BRCA_ctrl	BRCA_cancer	ORF_seq_similarity	TRUE	ORF is shorter
uc001ses.2,uc001sev.2	uc001sev.2	uc001ses.2	chr12:54410642..54424606,+	HOXC6	KICH_ctrl	KICH_cancer	ORF_seq_similarity	TRUE	ORF is longer
uc001ses.2,uc001sev.2	uc001sev.2	uc001ses.2	chr12:54410642..54424606,+	HOXC6	KIRC_ctrl	KIRC_cancer	ORF_seq_similarity	TRUE	ORF is longer
uc001ses.2,uc001sev.2	uc001sev.2	uc001ses.2	chr12:54410642..54424606,+	HOXC6	KIRP_ctrl	KIRP_cancer	ORF_seq_similarity	TRUE	ORF is longer
uc001sfy.3,uc001sfv.1	uc001sfv.1	uc001sfy.3	chr12:54762920..54785083,-	ZNF385A	KIRP_ctrl	KIRP_cancer	ORF_seq_similarity	TRUE	ORF is shorter
uc001shh.2,uc001shf.2	uc001shf.2	uc001shh.2	chr12:56078356..56106089,-	ITGA7	KIRP_ctrl	KIRP_cancer	coding_potential	TRUE	Transcript is Noncoding
uc001shh.2,uc001shf.2	uc001shf.2	uc001shh.2	chr12:56078356..56106089,-	ITGA7	KIRP_ctrl	KIRP_cancer	ORF_seq_similarity	TRUE	ORF is shorter
uc001shh.2,uc001shf.2	uc001shf.2	uc001shh.2	chr12:56078356..56106089,-	ITGA7	KIRP_ctrl	KIRP_cancer	domains_identified	TRUE	Domain loss
uc001shh.2,uc001shf.2	uc001shf.2	uc001shh.2	chr12:56078356..56106089,-	ITGA7	THCA_ctrl	THCA_cancer	coding_potential	TRUE	Transcript is Noncoding
uc001shh.2,uc001shf.2	uc001shf.2	uc001shh.2	chr12:56078356..56106089,-	ITGA7	THCA_ctrl	THCA_cancer	ORF_seq_similarity	TRUE	ORF is shorter
uc001shh.2,uc001shf.2	uc001shf.2	uc001shh.2	chr12:56078356..56106089,-	ITGA7	THCA_ctrl	THCA_cancer	domains_identified	TRUE	Domain loss
uc001sia.2,uc001sib.2	uc001sib.2	uc001sia.2	chr12:56229215..56236735,-	MMP19	THCA_ctrl	THCA_cancer	ORF_seq_similarity	TRUE	ORF is longer
uc001sia.2,uc001sib.2	uc001sib.2	uc001sia.2	chr12:56229215..56236735,-	MMP19	THCA_ctrl	THCA_cancer	domains_identified	TRUE	Domain gain
uc001sia.2,uc001sib.2	uc001sib.2	uc001sia.2	chr12:56229215..56236735,-	MMP19	THCA_ctrl	THCA_cancer	signal_peptide_identified	TRUE	Signal peptide gain
uc010spw.1,uc001sib.2	uc001sib.2	uc010spw.1	chr12:56229215..56236735,-	MMP19	THCA_ctrl	THCA_cancer	ORF_seq_similarity	TRUE	ORF is longer
uc010spw.1,uc001sib.2	uc001sib.2	uc010spw.1	chr12:56229215..56236735,-	MMP19	THCA_ctrl	THCA_cancer	domains_identified	TRUE	Domain gain
uc001ska.2,uc001skb.2	uc001skb.2	uc001ska.2	chr12:56555637..56583351,-	SMARCC2	BRCA_ctrl	BRCA_cancer	intron_retention	TRUE	Intron retention gain
uc001ska.2,uc001skb.2	uc001skb.2	uc001ska.2	chr12:56555637..56583351,-	SMARCC2	COAD_ctrl	COAD_cancer	intron_retention	TRUE	Intron retention gain
uc001ska.2,uc001skb.2	uc001skb.2	uc001ska.2	chr12:56555637..56583351,-	SMARCC2	KICH_ctrl	KICH_cancer	intron_retention	TRUE	Intron retention gain
uc001ska.2,uc001skb.2	uc001skb.2	uc001ska.2	chr12:56555637..56583351,-	SMARCC2	LUAD_ctrl	LUAD_cancer	intron_retention	TRUE	Intron retention gain
uc001ska.2,uc001skb.2	uc001skb.2	uc001ska.2	chr12:56555637..56583351,-	SMARCC2	LUSC_ctrl	LUSC_cancer	intron_retention	TRUE	Intron retention gain
uc001ska.2,uc001skb.2	uc001skb.2	uc001ska.2	chr12:56555637..56583351,-	SMARCC2	STAD_ctrl	STAD_cancer	intron_retention	TRUE	Intron retention gain
uc001slj.2,uc009zot.2	uc009zot.2	uc001slj.2	chr12:56864737..56882181,-	GLS2	LIHC_ctrl	LIHC_cancer	ORF_seq_similarity	TRUE	ORF is shorter
uc001qii.1,uc001qik.1	uc001qik.1	uc001qii.1	chr12:569543..671058,+	B4GALNT3	COAD_ctrl	COAD_cancer	ORF_seq_similarity	TRUE	ORF is shorter
uc001qii.1,uc001qik.1	uc001qik.1	uc001qii.1	chr12:569543..671058,+	B4GALNT3	COAD_ctrl	COAD_cancer	domains_identified	TRUE	Domain loss
uc001slp.1,uc001slo.1	uc001slo.1	uc001slp.1	chr12:56989380..57030163,-	BAZ2A	KIRC_ctrl	KIRC_cancer	intron_retention	TRUE	Intron retention loss
uc001slp.1,uc001slo.1	uc001slo.1	uc001slp.1	chr12:56989380..57030163,-	BAZ2A	KIRC_ctrl	KIRC_cancer	ORF_seq_similarity	TRUE	ORF is shorter
uc001slp.1,uc001slo.1	uc001slo.1	uc001slp.1	chr12:56989380..57030163,-	BAZ2A	KIRC_ctrl	KIRC_cancer	domains_identified	TRUE	Domain loss
uc001slp.1,uc001slo.1	uc001slo.1	uc001slp.1	chr12:56989380..57030163,-	BAZ2A	KIRP_ctrl	KIRP_cancer	intron_retention	TRUE	Intron retention loss
uc001slp.1,uc001slo.1	uc001slo.1	uc001slp.1	chr12:56989380..57030163,-	BAZ2A	KIRP_ctrl	KIRP_cancer	ORF_seq_similarity	TRUE	ORF is shorter
uc001slp.1,uc001slo.1	uc001slo.1	uc001slp.1	chr12:56989380..57030163,-	BAZ2A	KIRP_ctrl	KIRP_cancer	domains_identified	TRUE	Domain loss
uc001slp.1,uc001slo.1	uc001slo.1	uc001slp.1	chr12:56989380..57030163,-	BAZ2A	THCA_ctrl	THCA_cancer	intron_retention	TRUE	Intron retention loss
uc001slp.1,uc001slo.1	uc001slo.1	uc001slp.1	chr12:56989380..57030163,-	BAZ2A	THCA_ctrl	THCA_cancer	ORF_seq_similarity	TRUE	ORF is shorter
uc001slp.1,uc001slo.1	uc001slo.1	uc001slp.1	chr12:56989380..57030163,-	BAZ2A	THCA_ctrl	THCA_cancer	domains_identified	TRUE	Domain loss
uc001smy.2,uc001smx.2	uc001smx.2	uc001smy.2	chr12:57449427..57472574,-	TMEM194A	KIRC_ctrl	KIRC_cancer	ORF_seq_similarity	TRUE	ORF is shorter
uc001smy.2,uc001smx.2	uc001smx.2	uc001smy.2	chr12:57449427..57472574,-	TMEM194A	THCA_ctrl	THCA_cancer	ORF_seq_similarity	TRUE	ORF is shorter
uc001sna.2,uc010srd.1	uc010srd.1	uc001sna.2	chr12:57489195..57522883,-	STAT6	KICH_ctrl	KICH_cancer	ORF_seq_similarity	TRUE	ORF is shorter
uc001sna.2,uc010srd.1	uc010srd.1	uc001sna.2	chr12:57489195..57522883,-	STAT6	KICH_ctrl	KICH_cancer	domains_identified	TRUE	Domain loss
uc001sna.2,uc010srd.1	uc010srd.1	uc001sna.2	chr12:57489195..57522883,-	STAT6	KIRP_ctrl	KIRP_cancer	ORF_seq_similarity	TRUE	ORF is shorter
uc001sna.2,uc010srd.1	uc010srd.1	uc001sna.2	chr12:57489195..57522883,-	STAT6	KIRP_ctrl	KIRP_cancer	domains_identified	TRUE	Domain loss
uc001snq.2,uc001snp.2	uc001snp.2	uc001snq.2	chr12:57637242..57644976,-	STAC3	BRCA_ctrl	BRCA_cancer	ORF_seq_similarity	TRUE	ORF is longer
uc009zqf.2,uc010ssg.1	uc010ssg.1	uc009zqf.2	chr12:58213712..58240747,-	CTDSP2	KIRC_ctrl	KIRC_cancer	ORF_seq_similarity	TRUE	ORF is longer
uc001sqm.2,uc010ssg.1	uc010ssg.1	uc001sqm.2	chr12:58213712..58240747,-	CTDSP2	KIRP_ctrl	KIRP_cancer	ORF_seq_similarity	TRUE	ORF is shorter
uc009zqf.2,uc010ssg.1	uc010ssg.1	uc009zqf.2	chr12:58213712..58240747,-	CTDSP2	KIRP_ctrl	KIRP_cancer	ORF_seq_similarity	TRUE	ORF is longer
uc001src.1,uc001srb.1	uc001srb.1	uc001src.1	chr12:62654187..62799898,+	USP15	LIHC_ctrl	LIHC_cancer	domains_identified	TRUE	Domain gain
uc001srp.1,uc010sso.1	uc010sso.1	uc001srp.1	chr12:63952693..64062354,-	DPY19L2	KICH_ctrl	KICH_cancer	ORF_seq_similarity	TRUE	ORF is shorter
uc001srp.1,uc010sso.1	uc010sso.1	uc001srp.1	chr12:63952693..64062354,-	DPY19L2	KIRC_ctrl	KIRC_cancer	ORF_seq_similarity	TRUE	ORF is shorter
uc001srp.1,uc010sso.1	uc010sso.1	uc001srp.1	chr12:63952693..64062354,-	DPY19L2	KIRP_ctrl	KIRP_cancer	ORF_seq_similarity	TRUE	ORF is shorter
uc001qnu.2,uc001qnt.2	uc001qnt.2	uc001qnu.2	chr12:6437924..6451261,-	TNFRSF1A	KICH_ctrl	KICH_cancer	ORF_seq_similarity	TRUE	ORF is shorter
uc001qnu.2,uc001qnt.2	uc001qnt.2	uc001qnu.2	chr12:6437924..6451261,-	TNFRSF1A	KICH_ctrl	KICH_cancer	domains_identified	TRUE	Domain loss
uc001qnu.2,uc001qnt.2	uc001qnt.2	uc001qnu.2	chr12:6437924..6451261,-	TNFRSF1A	KICH_ctrl	KICH_cancer	signal_peptide_identified	TRUE	Signal peptide loss
uc001qnw.2,uc001qnv.2	uc001qnv.2	uc001qnw.2	chr12:6456011..6486523,-	SCNN1A	KIRP_ctrl	KIRP_cancer	ORF_seq_similarity	TRUE	ORF is shorter
uc001ssg.3,uc001ssf.2	uc001ssf.2	uc001ssg.3	chr12:65107224..65153226,-	GNS	STAD_ctrl	STAD_cancer	ORF_seq_similarity	TRUE	ORF is shorter
uc001ssg.3,uc001ssf.2	uc001ssf.2	uc001ssg.3	chr12:65107224..65153226,-	GNS	THCA_ctrl	THCA_cancer	ORF_seq_similarity	TRUE	ORF is shorter
[truncated: 6,207 more rows]
