# Supplementary material for: The Landscape of Isoform Switches in Human Cancers
Source: Oxford University Press journal article supplement (doi:10.1158/1541-7786.mcr-16-0459), 2017-06-05
Supplement: 15417786mcr160459-sup-175983_2_unknown_upload_4059090_9qg9xd.xlsx [file 15417786mcr160459-sup-175983_2_unknown_upload_4059090_9qg9xd.xlsx]

## Sheet: Sheet1
gene_name	Cancer accronym	Cancer	Status	Source (PMID)
ACTN4	COAD	Colon adenocarcinoma	Novel	This study
ACTN4	LUAD	Lung adenocarcinoma	Known	15520177
APC	COAD	Colon adenocarcinoma	Known	15648050
ARMC10	LIHC	Liver hepatocellular carcinoma	Known	15520173
BIRC5	BRCA	Breast invasive carcinoma	Known	17395108
BNIP3	BRCA	Breast invasive carcinoma	Known	26416963
BRCA1	BRCA	Breast invasive carcinoma	Known	15648050
CALB2	BRCA	Breast invasive carcinoma	Novel	This study
CALB2	COAD	Colon adenocarcinoma	Known	8864572
CCND1	BRCA	Breast invasive carcinoma	Known	21041405
CCND1	PRAD	Prostate adenocarcinoma	Known	21041405
CCND3	BRCA	Breast invasive carcinoma	Novel	This study
CCND3	KICH	Kidney Chromophobe	Novel	This study
CCND3	LUSC	Lung squamous cell carcinoma	Novel	This study
CCND3	STAD	Stomach adenocarcinoma	Known	24807215
CD44	BRCA	Breast invasive carcinoma	Verified	21393860
CD44	COAD	Colon adenocarcinoma	Verified	15520162
CD44	KICH	Kidney Chromophobe	Novel	This study
CD44	LUAD	Lung adenocarcinoma	Verified	15520162
CD44	LUSC	Lung squamous cell carcinoma	Novel	This study
CD44	STAD	Stomach adenocarcinoma	Novel	This study
CD44	THCA	Thyroid carcinoma	Novel	This study
CD82	STAD	Stomach adenocarcinoma	Known	15520168
CDH11	BRCA	Breast invasive carcinoma	Known	12438268
CDKN2A	LUAD	Lung adenocarcinoma	Known	9416844
CDKN2A	LUSC	Lung squamous cell carcinoma	Novel	This study
CEACAM1	KICH	Kidney Chromophobe	Novel	This study
CEACAM1	LIHC	Liver hepatocellular carcinoma	Novel	This study
CEACAM1	LUAD	Lung adenocarcinoma	Verified	15520175
CEACAM1	LUSC	Lung squamous cell carcinoma	Novel	This study
DNMT3B	LIHC	Liver hepatocellular carcinoma	Known	15520172
ELK4	STAD	Stomach adenocarcinoma	Known	24807215
ESR1	BRCA	Breast invasive carcinoma	Known	15520182
FAS	BRCA	Breast invasive carcinoma	Known	21041405
FBLN2	BRCA	Breast invasive carcinoma	Verified	25578962
FBLN2	COAD	Colon adenocarcinoma	Verified	25578962
FBLN2	HNSC	Head and Neck squamous cell carcinoma	Novel	This study
FBLN2	LUAD	Lung adenocarcinoma	Novel	This study
FBLN2	LUSC	Lung squamous cell carcinoma	Novel	This study
FBLN2	STAD	Stomach adenocarcinoma	Novel	This study
FBLN2	THCA	Thyroid carcinoma	Novel	This study
FGFR1	BRCA	Breast invasive carcinoma	Known	15520185
FGFR2	KIRC	Kidney Chromophobe	Verified	23444225
FGFR2	KIRP	Kidney renal papillary cell carcinoma	Novel	This study
FGFR3	COAD	Colon adenocarcinoma	Verified	18846105
FGFR3	KIRC	Kidney Chromophobe	Novel	This study
FGFR3	KIRP	Kidney renal papillary cell carcinoma	Novel	This study
FHIT	STAD	Stomach adenocarcinoma	Known	15648050
FN1	COAD	Colon adenocarcinoma	Known	15520192
FN1	LUAD	Lung adenocarcinoma	Known	15520192
HNF1B	PRAD	Prostate adenocarcinoma	Known	20569440
INSR	COAD	Colon adenocarcinoma	Known	15520166
INSR	THCA	Thyroid carcinoma	Known	15520166
KLF6	PRAD	Prostate adenocarcinoma	Known	16547952
KRAS	STAD	Stomach adenocarcinoma	Known	24807215
MAP2K4	STAD	Stomach adenocarcinoma	Verified	24807215
MAP2K4	THCA	Thyroid carcinoma	Novel	This study
MCM7	BRCA	Breast invasive carcinoma	Novel	This study
MCM7	LUAD	Lung adenocarcinoma	Novel	This study
MCM7	LUSC	Lung squamous cell carcinoma	Novel	This study
MCM7	STAD	Stomach adenocarcinoma	Verified	24807215
MSMB	PRAD	Prostate adenocarcinoma	Known	20569440
MST1R	BRCA	Breast invasive carcinoma	Known	15648050
MST1R	COAD	Colon adenocarcinoma	Known	15648050
MUC1	THCA	Thyroid carcinoma	Known	15520165
NCOA3	BRCA	Breast invasive carcinoma	Known	15520180
PLAUR	BRCA	Breast invasive carcinoma	Known	15520184
PLAUR	BRCA	Breast invasive carcinoma	Known	20635136
PUF60	COAD	Colon adenocarcinoma	Known	23594796
PUF60	KIRP	Kidney renal papillary cell carcinoma	Novel	This study
RAC1	COAD	Colon adenocarcinoma	Known	26300000
RAC1	COAD	Colon adenocarcinoma	Known	15520167
RAC1	KIRC	Kidney Chromophobe	Novel	This study
RAC1	LUAD	Lung adenocarcinoma	Verified	26300000
REST	LUAD	Lung adenocarcinoma	Known	15520174
RIPK3	COAD	Colon adenocarcinoma	Known	16547952
RIPK3	LUAD	Lung adenocarcinoma	Known	16547952
SH3PXD2A	LUAD	Lung adenocarcinoma	Known	23873940
SYK	BRCA	Breast invasive carcinoma	Known	15520183
SYK	KIRC	Kidney Chromophobe	Novel	This study
SYK	KIRP	Kidney renal papillary cell carcinoma	Novel	This study
TCF12	COAD	Colon adenocarcinoma	Verified	21999571
TNC	BRCA	Breast invasive carcinoma	Verified	15520191
TNC	COAD	Colon adenocarcinoma	Novel	This study
TNC	HNSC	Head and Neck squamous cell carcinoma	Novel	This study
TNC	LUAD	Lung adenocarcinoma	Novel	This study
TNC	LUSC	Lung squamous cell carcinoma	Novel	This study
TNC	STAD	Stomach adenocarcinoma	Novel	This study
TSG101	BRCA	Breast invasive carcinoma	Known	15520188
TSG101	LUAD	Lung adenocarcinoma	Known	15520188
VEGFA	COAD	Colon adenocarcinoma	Known	17027147
VEGFA	KIRC	Kidney Chromophobe	Novel	This study
VEGFA	KIRP	Kidney renal papillary cell carcinoma	Novel	This study
VEGFA	LIHC	Liver hepatocellular carcinoma	Novel	This study
VEGFA	LUAD	Lung adenocarcinoma	Verified	15520176
VEGFA	LUSC	Lung squamous cell carcinoma	Novel	This study
VEGFA	PRAD	Prostate adenocarcinoma	Known	17027147
WISP1	COAD	Colon adenocarcinoma	Known	18846105
WISP1	KICH	Kidney Chromophobe	Novel	This study
WISP1	STAD	Stomach adenocarcinoma	Known	15520169
ZAK	BRCA	Breast invasive carcinoma	Verified	24807215
ZAK	COAD	Colon adenocarcinoma	Verified	24807215
ZAK	KIRC	Kidney Chromophobe	Novel	This study
ZAK	KIRP	Kidney renal papillary cell carcinoma	Novel	This study
ZAK	PRAD	Prostate adenocarcinoma	Novel	This study
ZAK	STAD	Stomach adenocarcinoma	Verified	24807215
