# Supplementary material for: The Landscape of Isoform Switches in Human Cancers
Source: Oxford University Press journal article supplement (doi:10.1158/1541-7786.mcr-16-0459), 2017-06-05
Supplement: 15417786mcr160459-sup-175983_2_unknown_upload_4059091_pqgpxp.xlsx [file 15417786mcr160459-sup-175983_2_unknown_upload_4059091_pqgpxp.xlsx]

## Sheet: Sheet1
Pair of Isoforms in Switch (downRegulated, upRegulated)	# Cancers Found	gene_id	gene_name
uc001dvk.1,uc010ouv.1	2	chr1:108113782..108507545,-	VAV3
uc001eai.1,uc009wfz.1	3	chr1:111682249..111727724,+	CEPT1
uc001eam.2,uc001ean.2	3	chr1:111770281..111786060,+	CHI3L2
uc001ebh.3,uc001ebg.3	2	chr1:112025971..112106597,-	ADORA3
uc001edk.2,uc009wgo.2	2	chr1:113933475..114228535,+	MAGI3
uc010oxf.1,uc001ehn.2	2	chr1:119573841..119683295,-	WARS2
uc001att.2,uc001atu.2	5	chr1:12227060..12269276,+	TNFRSF1B
uc001aer.3,uc002quu.2	2	chr1:1270659..1284492,-	DVL1
uc001afq.2,uc001afp.2	3	chr1:1353802..1356650,-	LOC441869
uc001avk.2,uc009voe.2	2	chr1:14026735..14151572,+	PRDM2
uc001eln.3,uc001emf.1	2	chr1:144676873..145076079,-	PDE4DIP
uc001enn.3,uc001enm.1	4	chr1:145438462..145442626,+	TXNIP
uc001epm.3,uc009wji.2	3	chr1:146714291..146767441,+	CHD1L
uc001avq.2,uc001avr.2	2	chr1:14925213..15444543,+	KAZ
uc001etp.2,uc001etq.2	3	chr1:150039342..150117504,+	VPS45
uc001eur.2,uc001euq.2	2	chr1:150459920..150479747,+	TARS2
uc001eux.2,uc009wlx.2	2	chr1:150521898..150533410,+	ADAMTSL4
uc001exr.2,uc010pcw.1	2	chr1:151264413..151300133,-	PI4KB
uc009wmw.2,uc010pde.1	3	chr1:151483862..151511165,+	CGN
uc001fck.1,uc001fcl.1	3	chr1:153600873..153604513,+	S100A1
uc001ffr.2,uc010pep.1	3	chr1:154916561..154928567,-	PBXIP1
uc001fhg.2,uc001fhf.2	2	chr1:155036213..155060006,+	EFNA3
uc001fnm.2,uc001fnn.2	3	chr1:156119810..156147534,+	SEMA4A
uc001fqj.1,uc001fqk.1	3	chr1:156863523..156886226,+	PEAR1
uc001aws.2,uc001awt.2	2	chr1:15853352..15918872,+	DNAJC16
uc001fvx.2,uc010pjg.1	3	chr1:160313063..160328741,+	NCSTN
uc001axx.3,uc001axy.3	3	chr1:16348486..16383802,+	CLCNKB
uc001gdt.1,uc010plf.1	2	chr1:166808724..166823709,+	POGK
uc001gge.3,uc001ggf.3	2	chr1:169433151..169455208,-	SLC19A2
uc009wwd.2,uc010pmn.1	3	chr1:172502260..172580971,+	C1orf9
uc001baf.2,uc010ocm.1	3	chr1:17393257..17445948,-	PADI2
uc010ocs.1,uc001bao.2	2	chr1:17866330..18024369,+	ARHGEF10L
uc001bbc.2,uc010ocu.1	4	chr1:19197926..19229293,-	ALDH4A1
uc001gti.3,uc001gtj.3	6	chr1:196621008..196716631,+	CFH
uc001bcn.2,uc001bcm.2	2	chr1:20008707..20126758,-	TMCO4
uc010ppm.1,uc001gvo.2	2	chr1:200860639..200884863,+	C1orf106
uc001gyq.3,uc010pqd.1	2	chr1:202909963..202927700,-	ADIPOR1
uc001gzw.2,uc001gzx.2	2	chr1:203595928..203713207,+	ATP2B4
uc001hba.2,uc001hbb.2	2	chr1:204485511..204677661,+	MDM4
uc001hcq.2,uc001hct.2	4	chr1:205473727..205501915,+	CDK18
uc001hed.2,uc001hef.2	2	chr1:206680879..206762615,+	RASSF5
uc001hey.2,uc010prz.1	2	chr1:207076633..207096592,-	FAIM3
uc001hfp.3,uc001hfq.3	3	chr1:207494817..207534309,+	CD55
uc001bdh.2,uc001bdg.2	2	chr1:20808885..20812728,-	CAMK2N1
uc001hhz.3,uc001hia.3	3	chr1:210501606..210849631,+	HHAT
uc001hif.2,uc009xcz.2	3	chr1:211432708..211489723,+	RCOR3
uc010ptr.1,uc001hke.2	2	chr1:213224588..213446807,+	RPS6KC1
uc001hks.2,uc009xdn.2	3	chr1:215740735..215795147,+	KCTD3
uc001hkw.1,uc010pud.1	2	chr1:216676588..217311097,-	ESRRG
uc001hlg.3,uc001hlf.1	2	chr1:217603834..217804409,-	GPATCH2
uc001beu.3,uc010odp.1	2	chr1:21835858..21904904,+	ALPL
uc001bfh.1,uc001bfg.1	3	chr1:22138758..22151714,+	LDLRAD2
uc001hok.2,uc001hol.2	2	chr1:224415037..224517872,-	NVL
uc001hxz.1,uc001hxy.1	3	chr1:236681565..236712996,+	LGALS8
uc001hyi.3,uc010pxy.1	2	chr1:236958581..237067280,+	MTR
uc001hza.2,uc001hzc.2	3	chr1:241756453..241803701,-	OPN3
uc001iao.2,uc001iap.2	2	chr1:244816352..244872332,+	PPPDE1
uc001iat.2,uc001iar.2	9	chr1:244998639..245008357,+	FAM36A
uc001ibl.2,uc001ibi.2	3	chr1:245912645..246670614,-	SMYD3
uc001bjh.2,uc001bjg.2	2	chr1:24742245..24799472,+	NIPAL3
uc001bmr.1,uc010ofe.1	5	chr1:26856249..26901520,+	RPS6KA1
uc001bnm.2,uc001bnl.2	3	chr1:27425301..27481451,-	SLC9A1
uc001bom.2,uc001boi.2	2	chr1:27938803..27961727,-	FGR
uc001btk.1,uc001bti.1	2	chr1:32117848..32169768,-	COL16A1
uc010ogv.1,uc001buf.3	3	chr1:32538503..32568465,+	TMEM39B
uc001bug.2,uc009vtz.2	2	chr1:32573644..32642166,+	KPNA6
uc010ohm.1,uc010ohn.1	2	chr1:33207512..33240571,+	KIAA1522
uc001akl.2,uc001akk.2	2	chr1:3404513..3528059,-	MEGF6
uc001byx.2,uc001byw.2	2	chr1:35899092..36023551,-	KIAA0319L
uc001aky.2,uc010nzm.1	5	chr1:3728645..3773797,-	KIAA0562
uc001ccg.1,uc001ccf.1	2	chr1:38326369..38412729,-	INPP5B
uc001cfb.2,uc010ojf.1	3	chr1:40538382..40563142,-	PPT1
uc001cfj.2,uc010ojj.1	2	chr1:40839728..40888992,+	SMAP2
uc001chk.2,uc001chl.2	3	chr1:42922173..42926085,+	PPCS
uc001ciu.2,uc010okg.1	5	chr1:43766664..43788778,+	TIE1
uc001ckc.2,uc009vwy.2	2	chr1:44171495..44396830,+	ST3GAL3
uc001clj.2,uc009vxc.2	2	chr1:44457280..44462196,+	CCDC24
uc001coj.1,uc001coi.1	5	chr1:46049717..46084567,+	NASP
uc001cpb.3,uc010olv.1	2	chr1:46505813..46642160,-	PIK3R3
uc001csq.1,uc001csp.3	4	chr1:51819935..51984995,-	EPS15
uc001ctd.3,uc009vzb.2	3	chr1:52254868..52344609,-	NRD1
uc001cuj.2,uc009vzh.2	2	chr1:53192131..53293011,+	ZYG11B
uc001cup.3,uc001cuo.3	3	chr1:53361904..53392851,-	ECHDC2
uc001cur.1,uc001cut.1	4	chr1:53392948..53517282,+	SCP2
uc001czi.3,uc001czm.3	4	chr1:59762625..60228400,+	FGGY
uc009vlw.1,uc001alw.1	4	chr1:6052766..6160523,+	KCNAB2
uc001czx.2,uc001czw.2	2	chr1:61542946..61928459,+	NFIA
uc001amq.2,uc001ams.2	3	chr1:6324333..6453826,-	ACOT7
uc001daz.2,uc010oow.1	2	chr1:63833261..63904232,+	ALG6
uc001dbo.1,uc010opa.1	3	chr1:64936476..65158741,+	CACHD1
uc001dck.2,uc009wao.2	5	chr1:65886318..66102820,+	LEPR
uc001dhq.2,uc001dhr.2	3	chr1:78030191..78149104,-	ZZZ3
uc001dij.2,uc010orn.1	2	chr1:78444934..78482993,+	DNAJB4
uc001djl.2,uc010oru.1	3	chr1:84543636..84704179,+	PRKACB
uc001dmn.2,uc010osr.1	2	chr1:89149922..89301937,+	PKN2
uc010nyc.1,uc001aci.2	2	chr1:934342..935552,-	HES4
uc001apy.2,uc001apz.2	6	chr1:9648977..9674935,+	TMEM201
uc001drq.2,uc001drt.2	2	chr1:97187175..97280599,+	PTBP2
uc001kqd.3,uc001kqe.3	5	chr10:101491958..101515893,+	CUTC
uc001kqh.2,uc010qpl.1	4	chr10:101635334..101769676,-	DNMBP
uc009xwy.1,uc009xwx.1	3	chr10:103605356..103815932,-	C10orf76
uc001kza.2,uc001kyy.2	3	chr10:111967363..112047121,+	MXI1
uc001kzl.3,uc010qrg.1	4	chr10:112679301..112773424,+	SHOC2
uc001kzs.2,uc010qrj.1	2	chr10:114133916..114188137,+	ACSL5
uc001ldw.2,uc010qsz.1	2	chr10:120863611..120897215,+	FAM45A
uc010qtf.1,uc009xzn.2	2	chr10:122610695..122669035,+	WDR11
uc010qtj.1,uc001lfg.3	2	chr10:123237845..123357972,-	FGFR2
uc001ljg.1,uc001lje.1	2	chr10:127524909..127585027,-	DHX32
uc001lmg.1,uc010qvd.1	3	chr10:135093138..135125841,-	TUBGCP2
uc001iqg.1,uc009xkc.1	2	chr10:20105372..20569115,+	PLXDC2
uc001irh.2,uc009xkg.2	3	chr10:22605299..22620417,+	BMI1
uc001irl.3,uc010qcu.1	2	chr10:22823767..23003503,-	PIP4K2A
uc001iru.3,uc001irx.2	2	chr10:23983675..24836771,+	KIAA1217
uc001jea.2,uc001jeb.2	2	chr10:46955444..46970601,-	SYT15
uc001jem.2,uc001jeo.1	2	chr10:47746920..47770843,+	ANXA8L2
uc001jie.2,uc010qgu.1	2	chr10:50942688..50970425,-	OGDHL
uc001jis.3,uc010qhf.1	3	chr10:51565108..51590733,+	NCOA4
uc001jje.2,uc010qhk.1	2	chr10:52065346..52384923,-	SGMS1
uc001ije.2,uc009xil.2	2	chr10:6186843..6277505,+	PFKFB3
uc001jnb.2,uc001jnc.2	2	chr10:69556428..69597937,-	DNAJC12
uc001joi.2,uc010qix.1	3	chr10:70242098..70287584,-	SLC25A16
uc001jrm.2,uc009xqk.2	2	chr10:72575704..72640930,+	SGPL1
uc001jrr.3,uc001jru.3	3	chr10:73079010..73123145,+	SLC29A3
uc001jsm.2,uc001jsl.2	2	chr10:73576056..73611082,-	PSAP
uc001jwd.2,uc010qkz.1	2	chr10:75754951..75879912,+	VCL
uc001jxm.2,uc001jxs.3	6	chr10:78629359..79397577,-	KCNMA1
uc010qme.1,uc001kdi.1	3	chr10:86088410..86278276,+	FAM190B
uc001kga.3,uc010qnf.1	5	chr10:90973328..91174382,-	LIPA
uc001kgm.2,uc001kgl.2	3	chr10:91190056..91295313,-	SLC16A12
uc001khh.2,uc001khg.2	3	chr10:92922775..93044020,+	PCGF5
uc010qnq.1,uc001kic.2	2	chr10:94352825..94415150,+	KIF11
uc001kkz.2,uc010qoh.1	4	chr10:97365687..97416567,-	ALDH18A1
uc001klb.3,uc001kla.3	2	chr10:97423154..97453900,-	TCTN3
uc010qoj.1,uc001kle.1	2	chr10:97471536..97637022,+	ENTPD1
uc001kmp.2,uc001kmo.2	3	chr10:98353071..98480279,-	PIK3AP1
uc001kny.2,uc001knz.2	4	chr10:99344102..99372553,+	DHDPSL
uc001kog.1,uc009xvw.1	2	chr10:99344102..99436187,+	PI4K2A
uc001kou.1,uc001kot.1	2	chr10:99624758..99790585,-	CRTAC1
uc001miw.2,uc010rcd.1	2	chr11:10594638..10715535,-	MRVI1
uc001mjc.2,uc009ygf.2	4	chr11:10818594..10830582,-	EIF4G2
uc001pmn.2,uc010rwq.1	2	chr11:111800585..111893305,+	DIXDC1
uc001pro.1,uc001prn.1	2	chr11:117707693..117747367,-	FXYD6
uc001ptq.2,uc009zah.2	2	chr11:118443102..118473745,+	ARCN1
uc001pub.2,uc001pua.2	2	chr11:118618473..118661972,-	DDX6
uc010ryl.1,uc001pul.2	3	chr11:118868852..118886454,+	CCDC84
uc001pvz.2,uc001pwa.2	2	chr11:119056195..119060900,+	PDZD3
uc010rzj.1,uc001pwz.2	2	chr11:119981995..120008863,-	TRIM29
uc001mkc.2,uc010rcj.1	2	chr11:12115543..12285329,+	MICAL2
uc001pxu.2,uc001pxt.2	2	chr11:121163388..121184117,+	SC5DL
uc001pzt.2,uc001pzr.2	2	chr11:123986111..124017616,+	VWA5A
uc001qdc.3,uc001qdb.3	2	chr11:125826715..125933187,-	CDON
uc010sbs.1,uc009zch.2	4	chr11:128328656..128457453,-	ETS1
uc001qfp.2,uc001qfq.2	2	chr11:129939716..130014705,+	APLP2
uc010sci.1,uc001qgr.2	2	chr11:131240371..132206715,+	NTM
uc001mkz.2,uc010rcm.1	3	chr11:13409557..13484838,-	BTBD10
uc010qwz.1,uc001ltq.1	2	chr11:1490693..1507976,-	MOB2
uc001mmq.3,uc010rcw.1	2	chr11:17099277..17229530,-	PIK3C2A
uc001mod.1,uc001mof.1	4	chr11:18300217..18343721,-	HPS5
uc001luk.2,uc001lui.2	2	chr11:1874200..1913492,+	LSP1
uc001lok.3,uc010qvl.1	2	chr11:214625..236931,-	SIRT3
uc001mrj.3,uc001mrk.3	4	chr11:27387510..27494334,-	LGR4
uc001lxk.2,uc010qxq.1	2	chr11:3108346..3187969,-	OSBPL5
uc001muz.2,uc010rej.1	3	chr11:33762492..33796071,-	FBXO3
uc001mvx.2,uc001mvw.2	5	chr11:35160417..35253946,+	CD44
uc001lyh.2,uc001lyg.2	3	chr11:3696241..3818892,-	NUP98
uc001lyv.2,uc009yeg.2	2	chr11:3876933..4114440,+	STIM1
uc001nbw.1,uc001nby.1	2	chr11:45943196..45950647,+	GYLTL1B
uc001lzf.1,uc010qyj.1	2	chr11:4619902..4629437,-	TRIM68
uc001ndt.2,uc010rha.1	2	chr11:47185854..47198419,-	ARFGAP2
uc009ylm.2,uc001nek.2	4	chr11:47269851..47290400,+	NR1H3
uc001nkx.1,uc001nky.1	3	chr11:57435474..57468659,+	ZDHHC5
uc001nnb.2,uc001nnc.2	3	chr11:58476231..58499447,-	GLYAT
uc001lqf.2,uc001lqh.2	2	chr11:612556..615999,-	IRF7
uc001nse.1,uc010rll.1	2	chr11:61520121..61555989,+	C11orf9
uc001nsl.1,uc001nsj.2	2	chr11:61583728..61634825,+	FADS2
uc001ntq.1,uc010rlx.1	2	chr11:62360675..62369303,-	MTA2
uc001nwo.2,uc009yom.2	2	chr11:62756626..62783311,-	SLC22A8
uc001nxk.1,uc010rmr.1	2	chr11:63396437..63439444,-	ATL3
uc001oct.2,uc010rny.1	2	chr11:64879341..64883706,+	TM7SF2
uc010rok.1,uc001oeg.2	3	chr11:65306031..65326253,-	LTBP3
uc001ofb.2,uc010rom.1	2	chr11:65405578..65418391,+	SIPA1
uc001ojf.2,uc001oji.2	2	chr11:66512207..66610987,+	C11orf80
uc001oot.2,uc001oos.2	4	chr11:68816350..68929907,+	TPCN2
uc001opo.2,uc001opr.2	2	chr11:70116823..70230500,+	PPFIA1
uc001opw.3,uc001opv.3	2	chr11:70244612..70282689,+	CTTN
uc001oso.2,uc001osn.2	4	chr11:72287186..72385494,-	PDE2A
uc001ouw.2,uc001oux.2	2	chr11:73882368..73965747,+	PPME1
uc001owd.2,uc001owc.2	4	chr11:74811540..74917444,+	SLCO2B1
uc010rsq.1,uc001ozi.2	2	chr11:78147017..78285909,-	NARS2
uc001lrv.2,uc001lrw.2	3	chr11:826157..831991,+	EFCAB4A
uc001pab.1,uc009yvi.1	3	chr11:82905291..82967042,+	ANKRD42
uc001pbb.2,uc001pax.2	2	chr11:85405267..85522178,-	SYTL2
uc001mgt.2,uc010rbp.1	2	chr11:8714900..8932498,-	ST5
uc001pff.2,uc001pfg.1	2	chr11:94800056..94804387,+	SFRS2B
uc001mib.2,uc001mic.2	2	chr11:9800214..10315754,-	SBF2
uc001tgq.2,uc001tgp.2	2	chr12:100430865..100536642,-	UHRF1BP1L
uc001qxr.2,uc001qxq.2	2	chr12:10331557..10344402,+	C12orf59
uc001tkd.3,uc009zuj.2	3	chr12:104343981..104359473,-	C12orf73
uc001tml.1,uc001tmm.1	2	chr12:107712197..108053419,+	BTBD11
uc001toc.2,uc010sxm.1	3	chr12:109554400..109706028,+	ACACB
uc009zvk.2,uc001toz.3	2	chr12:110011500..110035070,+	MVK
uc001qjb.2,uc001qje.2	2	chr12:1100404..1605099,+	ERC1
uc009zvn.2,uc001tql.3	3	chr12:110719032..110788895,+	ATP2A2
uc001tqp.3,uc001tqo.2	3	chr12:110810705..110841535,-	ANAPC7
uc001ube.3,uc001ubf.2	2	chr12:122233174..122241390,-	LOC338799
uc001ubt.2,uc001ubr.2	2	chr12:122516760..122628965,+	MLXIP
uc001uci.1,uc001ucf.1	2	chr12:122755981..122907116,-	CLIP1
uc001uhc.2,uc009zyh.2	3	chr12:125549925..125627872,+	AACS
uc009zif.2,uc010shv.1	2	chr12:15773076..15942510,-	EPS8
uc001rdz.3,uc009zio.2	2	chr12:19282648..19529331,+	PLEKHA5
uc001rgh.2,uc010sjd.1	2	chr12:25205241..25261268,+	LRMP
uc001rhe.2,uc001rhd.2	4	chr12:26348269..26405853,+	SSPN
uc001rhm.2,uc001rhn.2	2	chr12:27091316..27118862,+	FGFR1OP2
uc010sjz.1,uc010skb.1	4	chr12:31433527..31479159,-	FAM60A
uc001rki.1,uc001rkk.1	2	chr12:31535157..31743952,-	DENND5B
uc001rks.2,uc001rkt.2	2	chr12:32112353..32146031,+	C12orf35
uc001qid.1,uc010sdl.1	2	chr12:329791..372002,-	SLC6A13
uc001ros.1,uc001rou.1	2	chr12:46123620..46301819,+	ARID2
uc009zkz.1,uc001rse.1	3	chr12:49086752..49110781,-	CCNT1
uc009zlk.2,uc001rvc.3	2	chr12:50184929..50222208,-	NCKAP5L
uc001rwj.3,uc001rwh.3	5	chr12:50569565..50677353,-	LIMA1
uc001rwp.1,uc001rwt.1	2	chr12:50794650..50873788,+	LARP4
uc001rxj.1,uc001rxg.1	3	chr12:51373319..51422058,-	SLC11A2
uc001sef.2,uc001seh.2	2	chr12:54104903..54121307,-	CALCOCO1
uc001ses.2,uc001sev.2	3	chr12:54410642..54424606,+	HOXC6
uc001shh.2,uc001shf.2	2	chr12:56078356..56106089,-	ITGA7
uc001ska.2,uc001skb.2	6	chr12:56555637..56583351,-	SMARCC2
uc001slp.1,uc001slo.1	3	chr12:56989380..57030163,-	BAZ2A
uc001smy.2,uc001smx.2	2	chr12:57449427..57472574,-	TMEM194A
uc001sna.2,uc010srd.1	2	chr12:57489195..57522883,-	STAT6
uc009zqf.2,uc010ssg.1	2	chr12:58213712..58240747,-	CTDSP2
uc001srp.1,uc010sso.1	3	chr12:63952693..64062354,-	DPY19L2
uc001ssg.3,uc001ssf.2	2	chr12:65107224..65153226,-	GNS
uc001ssm.2,uc001ssn.2	4	chr12:65672488..65860680,+	MSRB3
uc001qoj.2,uc001qol.2	3	chr12:6571406..6579843,-	VAMP1
uc001qqv.1,uc010sfj.1	4	chr12:6898651..6929976,+	CD4
uc001sui.2,uc009zrg.2	3	chr12:69201971..69239211,+	MDM2
uc001svm.2,uc001svl.1	2	chr12:70132631..70216982,+	RAB3IP
uc001qsa.1,uc010sfr.1	2	chr12:7055740..7070479,+	PTPN6
uc001qsi.2,uc010sfw.1	2	chr12:7085348..7125842,-	LPCAT3
uc001sws.2,uc009zru.1	3	chr12:72079878..72097837,+	TMEM19
uc001qst.2,uc001qsr.2	2	chr12:7282967..7311528,+	CLSTN3
uc001sxt.2,uc010stx.1	2	chr12:75891421..75905418,-	KRR1
uc001tar.2,uc001taq.2	2	chr12:88442791..88535993,-	CEP290
uc001tbh.2,uc009zsr.2	3	chr12:89981828..90049844,-	ATP2B1
uc010tjj.1,uc010tjl.1	4	chr13:111267881..111292340,+	CARKD
uc001vsr.2,uc010tjs.1	3	chr13:113622757..113752863,+	MCF2L
uc001vsx.2,uc001vsy.2	2	chr13:113777113..113803841,+	F10
uc001vtr.1,uc001vts.1	5	chr13:114110134..114145023,-	DCUN1D2
uc009zzr.1,uc001unp.2	2	chr13:21303073..21348095,-	N6AMT2
uc001usb.3,uc001usc.3	3	chr13:28874483..29069265,-	FLT1
uc001uud.2,uc001uuc.2	3	chr13:32974861..33002315,-	N4BP2L1
uc001uuw.2,uc001uuv.2	2	chr13:33677273..34250932,-	STARD13
uc001vag.2,uc010tft.1	2	chr13:45967456..45992516,-	SLC25A30
uc001vak.2,uc010aci.2	2	chr13:46039071..46110759,+	COG3
uc010tgx.1,uc001vgg.2	2	chr13:52706780..52733996,-	NEK3
uc010thn.1,uc010thp.1	4	chr13:72012098..72441330,-	DACH1
uc001vmh.2,uc001vmg.2	2	chr13:96085853..96232010,+	CLDN10
uc001vna.2,uc010tij.1	3	chr13:97874574..98046372,+	MBNL2
uc001yhl.1,uc001yhe.1	2	chr14:100800125..100842680,-	WARS
uc001yko.2,uc001ykn.2	2	chr14:102228135..102394326,+	PPP2R5C
uc001ynf.1,uc001yne.1	2	chr14:103985996..103989170,-	CKB
uc010axa.2,uc010tyk.1	5	chr14:105235689..105262080,-	AKT1
uc001yqx.2,uc001yrb.2	2	chr14:105886186..105937048,+	MTA1
uc001ysi.1,uc001ysh.1	2	chr14:106230841..106239113,-	FLJ00385
uc001vyr.2,uc001vys.2	2	chr14:21467419..21470030,+	SLC39A2
uc001wao.2,uc001wan.2	2	chr14:21819631..21852425,-	SUPT16H
uc001wiz.2,uc001wiw.2	2	chr14:23594506..23652849,-	SLC7A8
uc001wmr.2,uc001wms.2	3	chr14:24641234..24649462,+	REC8
uc001wqm.1,uc010amf.1	2	chr14:31091521..31205018,+	SCFD1
uc001wrf.3,uc001wrh.2	2	chr14:31760995..31926680,-	HEATR5A
uc001wwn.2,uc001wwo.2	2	chr14:50065415..50081389,+	PPIL5
uc001wxs.3,uc010ans.2	3	chr14:50583847..50698099,-	SOS2
uc001wxu.2,uc010tqo.1	2	chr14:50704287..50778947,-	L2HGDH
uc001wyi.2,uc001wyj.2	2	chr14:51186482..51297839,-	NIN
uc001wzd.2,uc001wzg.2	2	chr14:51955855..52197442,+	FRMD6
uc001xar.2,uc001xap.2	3	chr14:54863673..54886932,+	CDKN3
uc010tqz.1,uc001xaw.1	2	chr14:54941209..54955744,-	GMFB
uc001xcv.2,uc010tri.1	2	chr14:57735606..57756796,+	MUDENG
uc001xdc.2,uc001xde.2	2	chr14:58470809..58764850,-	C14orf37
uc001xer.3,uc010apm.2	2	chr14:60558629..60635851,+	C14orf135
uc001xia.2,uc010tsl.1	6	chr14:65381140..65529369,+	FNTB
uc001xjl.1,uc001xjp.1	2	chr14:68000008..68056255,+	PLEKHH1
uc001xrb.2,uc001xqz.2	2	chr14:75408540..75422291,-	PGF
uc001yac.3,uc010twl.1	3	chr14:92524897..92572965,-	ATXN3
uc001ycd.2,uc001ycb.1	2	chr14:94400513..94443076,-	ASB2
uc001ycj.2,uc010twr.1	2	chr14:94517269..94547558,-	DDX24
uc002cdl.2,uc002cdr.2	2	chr15:102501016..102516807,+	WASH3P
uc001yvc.2,uc001yve.2	2	chr15:23043281..23086843,-	NIPA1
uc001zaz.2,uc010uae.1	3	chr15:26788695..27184686,-	GABRB3
uc001zkw.2,uc001zku.2	3	chr15:40380094..40401075,-	BMF
uc010ucm.1,uc001zlc.2	2	chr15:40580099..40600174,-	PLCB2
uc001zlh.3,uc010ucn.1	4	chr15:40623654..40633168,-	C15orf52
uc001znl.2,uc010bcd.1	4	chr15:41523437..41574081,+	CHP
uc001zoz.2,uc010bcq.2	2	chr15:42433399..42448810,-	PLA2G4F
uc001zqw.2,uc001zqv.2	2	chr15:43477466..43488228,+	CCNDBP1
uc001ztp.2,uc001ztq.2	2	chr15:44580929..44707955,+	CASC4
uc001zvh.2,uc001zvg.2	2	chr15:45722763..45725645,+	C15orf48
uc001zwn.3,uc001zwq.3	2	chr15:48483867..48596273,+	SLC12A1
uc001zws.2,uc001zww.2	8	chr15:48623621..48635568,+	DUT
uc002abx.3,uc010ugd.1	2	chr15:52599480..52821247,-	MYO5A
uc002acg.3,uc002acf.3	4	chr15:52873523..52970953,-	KIAA1370
uc002acj.2,uc010bfh.1	3	chr15:53805938..54051859,-	WDR72
uc002aex.2,uc002aew.2	4	chr15:58245628..58571462,-	ALDH1A2
uc010uhc.1,uc002agi.3	2	chr15:59955064..59981642,-	BNIP2
uc002alj.2,uc002alt.2	3	chr15:63334838..63364111,+	TPM1
uc002amc.2,uc002ame.2	5	chr15:63615731..63674075,-	CA12
uc002amf.2,uc010uik.1	3	chr15:63796810..63883659,+	USP3
uc002anv.2,uc010bgz.2	3	chr15:65134082..65160199,+	PLEKHO2
uc002aqf.2,uc002aqg.2	3	chr15:66994674..67074335,+	SMAD6
uc002ass.2,uc002ast.2	4	chr15:71123891..71146498,-	LARP6
uc002atq.2,uc010ukh.1	4	chr15:72452148..72490136,-	GRAMD2
uc002azk.1,uc010uly.1	8	chr15:75287901..75313836,+	SCAMP5
uc002bdb.1,uc002bdc.1	2	chr15:78396991..78423878,-	CIB2
uc002bgl.1,uc002bgk.2	2	chr15:81475093..81605101,+	IL16
uc002bjp.2,uc002bjr.2	4	chr15:83776324..83806110,+	TM6SF1
uc002blh.2,uc002bll.2	5	chr15:85525205..85682370,+	PDE8A
uc002bnz.2,uc002bny.2	2	chr15:90014638..90039799,-	RHCG
uc010upy.1,uc002boi.2	2	chr15:90226289..90233958,-	PEX11A
uc010boe.2,uc002bsl.3	2	chr15:93160681..93277304,-	FAM174B
uc002btl.2,uc002btj.2	2	chr15:94774801..95027180,+	MCTP2
uc010bom.2,uc002bui.3	2	chr15:98462784..98517067,+	ARRDC4
uc002buo.2,uc002buq.2	3	chr15:99645286..99675799,+	SYNM
uc002dbr.2,uc002dbt.2	4	chr16:11961987..12010519,-	GSPT1
uc010uza.1,uc002dcj.2	2	chr16:14165196..14360629,+	MKL2
uc010uzd.1,uc010uzf.1	2	chr16:14529559..14724124,-	PARN
uc002dde.2,uc010uzp.1	4	chr16:15153881..15188158,-	RRN3
uc002ddn.2,uc002ddm.2	2	chr16:15489611..15503543,+	MPV17L
uc002den.3,uc002deo.3	4	chr16:16243423..16317328,-	ABCC6
uc002coc.2,uc002cob.2	2	chr16:2034150..2037748,+	GFER
uc002dhe.2,uc002dhd.1	2	chr16:20420856..20452278,+	ACSM5
uc002cok.2,uc002coi.2	3	chr16:2076888..2089026,+	SLC9A3R2
uc002dra.2,uc002drg.2	2	chr16:28834414..28848556,+	ATXN2L
uc002dtb.2,uc002dta.2	7	chr16:29465866..29476300,+	SULT1A3
uc002frc.1,uc002dts.3	6	chr16:29802058..29816706,+	KIF22
uc002dxw.2,uc002dxy.2	2	chr16:30389457..30394171,-	SEPT1
uc010bzx.2,uc002dyd.2	2	chr16:30418735..30440920,+	ZNF771
uc002csx.1,uc002csy.1	2	chr16:3072626..3074287,-	HCFC1R1
uc002ehi.3,uc002ehj.2	3	chr16:53468351..53525559,+	RBL2
uc002ehr.2,uc002ehs.2	4	chr16:53737875..54148378,+	FTO
uc002ehz.3,uc002eia.3	2	chr16:55513081..55540584,+	MMP2
uc002eks.1,uc010ccu.1	3	chr16:57126510..57181876,+	CPNE2
uc010vhz.1,uc010vhw.1	2	chr16:57792131..57896733,-	KIFC3
uc002enj.3,uc002enh.3	6	chr16:58426298..58440047,+	GINS3
uc002eqb.1,uc010vis.1	2	chr16:66754799..66785525,-	DYNC1LI2
uc002eqt.2,uc010viw.1	3	chr16:66995138..67009051,+	CES3
uc002esa.2,uc002esc.2	2	chr16:67233028..67237926,+	ELMO3
uc010cen.2,uc002eub.2	2	chr16:67708437..67753273,-	GFOD2
uc002eur.2,uc002eus.2	2	chr16:67906999..67920270,+	EDC4
uc002evq.1,uc002evp.1	2	chr16:68262450..68270136,-	ESRP2
uc002evr.2,uc010vlf.1	2	chr16:68279247..68294959,+	PLA2G15
uc002ewg.1,uc010cfg.1	3	chr16:68771195..68869444,+	CDH1
uc002ewp.1,uc002ewm.1	2	chr16:69151913..69166484,-	CHTF8
uc002exv.1,uc010vln.1	3	chr16:69796274..69975643,+	WWP2
uc002eyy.2,uc002eyz.2	3	chr16:70488498..70514176,+	FUK
uc010cgg.2,uc002faz.2	2	chr16:71762907..71842976,-	AP1G1
uc002cip.2,uc010bqy.2	2	chr16:718133..724170,+	RHOT2
uc002fbm.1,uc010vml.1	3	chr16:71924472..71962906,+	KIAA0174
uc002fbr.3,uc002fbx.3	2	chr16:72088508..72094957,+	HP
uc002ciw.1,uc002ciy.1	3	chr16:731667..734439,-	JMJD8
uc002cjb.2,uc002cja.2	2	chr16:742507..755808,-	FBXL16
uc002ffx.2,uc002ffw.3	2	chr16:81040103..81066707,+	CENPN
uc002cju.1,uc002cjy.1	2	chr16:810765..818865,+	MSLN
uc002fgx.2,uc010vnt.1	3	chr16:82660578..83830197,+	CDH13
uc002fhi.2,uc002fhh.2	3	chr16:84087371..84150517,-	MBTPS1
uc010vnx.1,uc010vny.1	2	chr16:84211462..84220662,-	TAF1C
uc002fjh.2,uc010chp.2	3	chr16:85932774..85956209,+	IRF8
uc002fom.1,uc002fol.1	6	chr16:89773541..89787394,-	C16orf7
uc010cjb.1,uc002fph.1	8	chr16:89985259..90002505,+	TUBB3
uc002fpo.1,uc002fpm.2	3	chr16:90015151..90034467,+	DEF8
uc002gnj.2,uc010vvj.1	2	chr17:11924135..12047050,+	MAP2K4
uc010vvl.1,uc010vvn.1	2	chr17:12692829..12894959,+	RICH2
uc002gnz.3,uc002gnw.3	2	chr17:12895703..12921359,-	ELAC2
uc002gox.2,uc002gow.2	2	chr17:15474805..15587613,-	TRIM16
uc002gph.1,uc002gpj.2	4	chr17:15902782..15932096,+	TTC19
uc002ftk.1,uc010vqr.1	2	chr17:1646130..1658559,+	SERPINF2
uc002ftl.2,uc010cjw.2	3	chr17:1665259..1680867,+	SERPINF1
uc002gvt.2,uc002gvr.2	2	chr17:19286757..19290503,-	MFAP4
uc002gvy.1,uc010vza.1	2	chr17:19437167..19482346,+	SLC47A1
uc010vqz.1,uc002fuw.3	2	chr17:2496923..2588908,+	PAFAH1B1
uc002haw.1,uc002hav.1	2	chr17:26655353..26662495,-	IFT20
uc010crl.1,uc002hbe.1	2	chr17:26684687..26728065,+	SARM1
uc002hbo.2,uc002hbn.2	2	chr17:26880406..26898887,-	PIGS
uc002hbu.2,uc002hbt.2	2	chr17:26941459..26972173,-	KIAA0100
uc010waw.1,uc002hco.2	3	chr17:27051368..27053949,-	TLCD1
uc002hdu.1,uc002hds.2	2	chr17:27400528..27507407,-	MYO18A
uc002hdy.3,uc002hdx.3	3	chr17:27582855..27621166,-	NUFIP2
uc002fwo.3,uc002fwn.3	2	chr17:3617920..3704537,-	ITGAE
uc010wdp.1,uc002hqc.2	2	chr17:36613644..36668627,+	ARHGAP23
uc002hrs.2,uc010cvt.2	2	chr17:37366790..37381974,-	STAC2
uc002hsj.2,uc010cvy.2	5	chr17:37827376..37844310,-	PGAP3
uc002hso.2,uc010wek.1	3	chr17:37844393..37884914,+	ERBB2
uc002hst.2,uc002hss.2	3	chr17:37894187..37903537,+	GRB7
uc002fxo.2,uc010ckp.2	2	chr17:4066667..4167274,-	ANKFY1
uc002hzz.2,uc002iab.2	2	chr17:40714092..40718294,+	COASY
uc002ibj.2,uc010wgx.1	2	chr17:40932696..40949079,+	WNK4
uc010wis.1,uc002ieu.2	2	chr17:42088557..42092415,-	TMEM101
uc002fxx.2,uc002fxy.2	7	chr17:4402129..4443228,+	SPNS2
uc002fxz.3,uc010vsa.1	5	chr17:4442192..4458681,-	MYBBP1A
uc002ild.3,uc010wkp.1	2	chr17:45195313..45266665,-	CDC27
uc002imd.2,uc002imf.2	2	chr17:45915049..45918699,-	SCRN2
uc002fyr.3,uc002fyq.3	2	chr17:4636830..4643223,-	CXCL16
uc002ins.1,uc010dbh.1	3	chr17:46673099..46682354,-	HOXB6
uc002isr.2,uc002iss.2	2	chr17:48796977..48830070,+	LUC7L3
uc002ita.2,uc002itb.2	3	chr17:49039536..49198226,-	SPAG9
uc002ixc.2,uc002ixd.2	3	chr17:57187308..57232800,-	SKA2
uc002ixn.1,uc010wof.1	2	chr17:57642886..57685702,+	DHX40
uc002jad.2,uc002jae.2	2	chr17:60704762..60770950,+	MRC2
uc002jat.2,uc010wpg.1	3	chr17:61509666..61523722,-	CYB561
uc002jau.1,uc002jav.1	4	chr17:61554434..61599203,+	ACE
uc002jbc.2,uc010wpn.1	2	chr17:61627822..61671639,+	DCAF7
uc002jfc.2,uc010wqh.1	3	chr17:63005409..63052920,-	GNA13
uc002gdd.3,uc010clm.2	2	chr17:6354584..6459877,-	PITPNM3
uc010clt.1,uc002geg.2	2	chr17:6926369..6932961,+	BCL6B
uc010vty.1,uc002ghb.2	2	chr17:7348406..7360931,+	CHRNB1
uc002jqk.1,uc002jqj.1	2	chr17:74035191..74068607,-	SRP68
uc002jsh.2,uc002jsi.2	2	chr17:74620847..74639894,-	ST6GALNAC1
uc002ghy.1,uc002ghz.1	2	chr17:7491498..7493488,-	SOX15
uc002gij.2,uc010cne.1	2	chr17:7565097..7590863,-	TP53
uc002jup.2,uc002juq.2	2	chr17:76126859..76139049,+	TMC8
uc002jva.3,uc002jvb.3	4	chr17:76183398..76203782,+	AFMID
uc002gjd.2,uc002gjj.2	3	chr17:7788123..7816075,+	CHD3
uc002jyt.1,uc002jyu.1	2	chr17:78518625..78940173,+	RPTOR
uc002kat.3,uc010dic.2	2	chr17:79523915..79604138,-	NPLOC4
uc002glc.2,uc010vuw.1	4	chr17:8213590..8225828,+	ARHGEF15
uc002gmj.1,uc002gmg.1	2	chr17:9813926..10101868,-	GAS7
uc010wzw.1,uc010wzx.1	4	chr18:12446512..12657912,-	SPIRE1
uc002ktw.2,uc010xap.1	3	chr18:20513295..20606445,+	RBBP8
uc002kum.3,uc010xaz.1	4	chr18:21108363..21166581,-	NPC1
uc002kus.3,uc002kut.3	2	chr18:21269562..21535027,+	LAMA3
uc002leb.2,uc002ldz.2	2	chr18:47349156..47721451,-	MYO5B
uc002lgs.2,uc010xea.1	2	chr18:55267894..55289177,-	NARS
uc002lgy.2,uc002lhg.2	2	chr18:55711619..56068772,+	NEDD4L
uc002kmz.3,uc002kmy.3	2	chr18:5954706..6414910,-	L3MBTL4
uc010xel.1,uc002lim.2	2	chr18:59854524..59974354,+	KIAA1468
uc002lmx.2,uc002lna.2	2	chr18:76829397..77138280,+	ATP9B
uc002moc.3,uc010dxe.2	3	chr19:10461205..10491277,-	TYK2
uc002mpf.2,uc002mpi.2	2	chr19:10713121..10755234,+	SLC44A2
uc002lrk.3,uc002lri.3	2	chr19:1107634..1174282,-	SBNO2
uc002mqk.3,uc010dxu.2	2	chr19:11200057..11244503,+	LDLR
uc002mqo.3,uc002mqm.2	2	chr19:11274944..11308467,-	KANK2
uc010dyr.1,uc010dys.2	3	chr19:12335503..12405714,-	ZNF44
uc002mxo.2,uc010dzh.2	2	chr19:14016956..14041693,+	CC2D1A
uc002nbc.2,uc002nba.3	4	chr19:15532319..15560762,-	WIZ
uc002ndi.2,uc002ndj.2	3	chr19:16178317..16213813,+	TPM4
uc002nfb.2,uc010xpj.1	3	chr19:17003763..17137625,-	CPAMD8
uc002nib.1,uc002nia.1	2	chr19:18264016..18288927,+	PIK3R2
uc002niz.2,uc002niy.2	2	chr19:18530221..18545371,+	SSBP4
uc002njv.3,uc002njw.3	4	chr19:18699495..18703146,+	C19orf60
uc010xqj.1,uc002nke.2	3	chr19:18893584..18902114,-	COMP
uc002nre.2,uc002nrd.2	2	chr19:23521419..23578269,-	ZNF91
uc002lvy.2,uc010dtc.1	2	chr19:2428165..2456958,-	LMNB2
uc010xgz.1,uc002lwj.2	2	chr19:2785506..2813590,+	THOP1
uc002nym.2,uc002nyn.2	3	chr19:35739559..35758865,+	LSR
uc002oiy.1,uc002oiw.1	3	chr19:39078281..39108643,-	MAP4K1
uc010egd.1,uc002ojc.1	2	chr19:39220832..39235114,-	CAPN12
uc002ojr.1,uc010xuo.1	2	chr19:39358474..39368894,-	RINL
uc002olu.1,uc002olt.1	2	chr19:39971052..39981528,+	TIMM50
uc002otv.2,uc002otw.2	3	chr19:43011459..43032639,-	CEACAM1
uc002paf.1,uc002pae.1	2	chr19:45417577..45422606,+	APOC1
uc002pbs.1,uc002pbv.2	2	chr19:45912872..45982086,-	ERCC1
uc002pcb.2,uc002pcc.2	3	chr19:45988551..46000313,-	RTN2
uc002pjv.2,uc002pjt.2	3	chr19:49122548..49133973,+	SPHK2
uc002pki.2,uc002pkh.2	2	chr19:49223843..49243970,-	RASIP1
uc002pkr.2,uc002pkt.2	4	chr19:49298320..49314301,-	BCAT2
uc002plp.2,uc010xzy.1	2	chr19:49471383..49496610,-	GYS1
uc002pmw.2,uc002pmy.2	4	chr19:49661052..49715091,+	TRPM4
uc002pqo.2,uc002pqr.2	2	chr19:50380829..50392000,+	TBC1D17
uc002qae.2,uc002qaf.2	2	chr19:53341786..53360902,-	ZNF468
uc010ydy.1,uc002qbt.1	3	chr19:53935227..53961514,+	ZNF761
uc002qdo.2,uc002qdn.2	3	chr19:54663836..54676944,-	TMC4
uc002qis.3,uc002qiw.2	3	chr19:55583388..55599290,+	EPS8L1
uc002qje.3,uc002qiz.3	2	chr19:55644162..55660606,-	TNNT1
uc002qlb.2,uc002qlc.2	3	chr19:55964348..55973049,-	ISOC2
uc002qqd.2,uc002qqe.2	2	chr19:58281025..58311962,+	ZNF586
uc002qqk.2,uc002qqo.2	3	chr19:58360099..58400442,-	ZNF814
uc002qrq.1,uc002qrs.1	4	chr19:58694396..58724927,+	ZNF274
uc002qtg.1,uc002qth.1	2	chr19:59055836..59062082,+	TRIM28
uc002lpk.1,uc010drt.1	3	chr19:676389..683392,+	FSTL3
uc002lpm.1,uc002lpn.1	3	chr19:708953..748330,+	PALM
uc002lpp.2,uc002lps.2	2	chr19:797392..812327,+	PTBP1
uc010dwg.1,uc010xkh.1	5	chr19:8920382..8942975,-	ZNF558
uc010fiv.2,uc002tau.3	2	chr2:101623691..101767846,-	TBC1D8
uc002rat.2,uc002ras.2	2	chr2:10861775..10925228,+	ATP6V1C2
uc002tej.2,uc002tei.2	4	chr2:109150857..109300887,+	LIMS1
uc010ywx.1,uc002tfp.2	2	chr2:110880916..110962639,-	NPHP1
uc002tjb.2,uc002tja.2	2	chr2:113856937..113891592,+	IL1RN
uc002tjc.2,uc002tjh.2	3	chr2:113931560..113960676,+	PSD4
uc010yjm.1,uc010yjo.1	2	chr2:11817721..11967531,+	LPIN1
uc002tmf.1,uc010yyr.1	2	chr2:120517207..120735037,+	PTPN4
uc010flk.2,uc010flm.2	3	chr2:120770669..120936694,+	EPB41L5
uc002tmx.2,uc010flq.2	2	chr2:121974166..122042778,-	TFCP2L1
uc002tvf.2,uc002tvd.2	3	chr2:138721590..138773933,+	HNMT
uc002tvn.2,uc002tvm.3	3	chr2:143886899..144525920,+	ARHGAP15
uc002rbz.1,uc002rca.1	2	chr2:14772856..14790933,+	FAM84A
uc002tzf.3,uc010zch.1	2	chr2:157291965..157470247,+	GPD2
uc002uak.3,uc002ual.3	2	chr2:160092305..160143236,-	WDSUB1
uc002ubd.2,uc002ubc.3	3	chr2:160625141..160761262,-	LY75
uc002ufe.2,uc002uff.2	2	chr2:170501935..170550931,-	C2orf77
uc002uhs.2,uc002uhr.2	3	chr2:173420101..173489823,+	PDK1
uc002uhy.2,uc002uhz.2	5	chr2:173940565..174132736,+	ZAK
uc002uji.2,uc002ujg.2	2	chr2:175664042..175870170,-	CHN1
uc010zfb.1,uc002ull.2	4	chr2:178257471..178408564,+	AGPS
uc002uny.2,uc002unw.2	2	chr2:182401402..182545381,-	CERKL
uc002uqk.2,uc010frx.2	3	chr2:189896642..190044605,-	COL5A2
uc002urz.2,uc010zge.1	3	chr2:191273081..191367041,+	MFSD6
uc002uvx.2,uc010fsu.2	2	chr2:201450731..201536215,+	AOX1
uc002uwe.2,uc002uwd.2	2	chr2:201717732..201729467,-	CLK1
uc002uxj.1,uc010ftb.1	3	chr2:202047621..202094110,+	CASP10
uc010zho.1,uc010zhp.1	2	chr2:202484907..202508224,-	ALS2CR4
uc010ftr.2,uc002uzf.3	2	chr2:203241050..203432473,+	BMPR2
uc002vcd.2,uc010ziz.1	2	chr2:208394616..208470282,+	CREB1
uc002vcl.2,uc010fum.2	2	chr2:208686012..208890284,-	PLEKHM3
uc002ved.2,uc010fuq.2	3	chr2:211295974..211341499,-	LANCL1
uc002vhm.1,uc002vhq.2	5	chr2:219135115..219211515,+	PNKD
uc002vij.1,uc010zkk.1	7	chr2:219472632..219501904,+	PLCD4
uc002vkw.1,uc002vky.2	2	chr2:220144040..220151622,+	DNAJB2
uc002vom.1,uc010fxf.1	2	chr2:228029281..228179507,+	COL4A3
uc002vqz.2,uc002vrc.2	2	chr2:231729621..231743962,+	ITM2C
uc002vrr.1,uc002vrq.3	2	chr2:232063342..232238606,+	ARMC9
uc002vts.2,uc010zmm.1	2	chr2:233743396..233877951,-	NGEF
uc002vui.1,uc010fyi.1	2	chr2:234263153..234380743,+	DGKD
uc002vuu.2,uc002vuv.3	2	chr2:234600321..234681949,+	UGT1A6
uc010znj.1,uc002vwj.2	2	chr2:238232655..238322850,-	COL6A3
uc002wat.1,uc002was.2	2	chr2:242089024..242122439,+	PPP1R7
uc002wbi.1,uc010zoq.1	2	chr2:242295711..242434255,+	FARP2
uc002wbs.2,uc002wbt.2	5	chr2:242523821..242576655,-	THAP4
uc002rew.2,uc010ykl.1	3	chr2:24299728..24397519,+	LOC375190
uc002rfk.2,uc010eyf.2	2	chr2:24787179..24993568,+	NCOA1
uc002rge.2,uc002rgb.2	8	chr2:25455846..25565459,-	DNMT3A
uc002rgq.2,uc002rgg.2	2	chr2:25600114..25896503,-	DTNB
uc002rii.3,uc002rik.3	3	chr2:27301506..27309263,+	EMILIN1
uc002rln.1,uc002rlm.1	3	chr2:27994584..28002608,+	MRPL33
uc010ynk.1,uc002rqa.3	2	chr2:37458774..37476301,+	C2orf56
uc002rqq.2,uc002rqr.2	3	chr2:38522031..38604432,-	ATL2
uc002rrk.3,uc002rrj.3	3	chr2:39208692..39351486,-	SOS1
uc002rrp.2,uc010yns.1	4	chr2:39476423..39664219,-	MAP4K3
uc002rsi.2,uc010ynv.1	2	chr2:42396490..42559686,+	EML4
uc002rus.2,uc010yoc.1	2	chr2:45615820..45838433,-	SRBD1
uc002rwd.3,uc010yoi.1	2	chr2:48010221..48034084,+	MSH6
uc002rxu.2,uc010you.1	3	chr2:54683454..54898582,+	SPTBN1
uc002saw.3,uc002sav.3	2	chr2:61293006..61365168,+	KIAA1841
uc002scp.2,uc002scn.2	3	chr2:64119668..64246214,-	VPS54
uc002sex.2,uc002sey.2	4	chr2:68906746..69053948,+	ARHGAP25
uc002shn.2,uc010fdy.2	2	chr2:71213070..71222001,-	TEX261
uc002sin.1,uc002sim.1	3	chr2:73143389..73162020,+	EMX1
uc002siw.2,uc002six.1	2	chr2:73441366..73454355,+	SMYD5
uc002sun.1,uc002suq.2	2	chr2:95963072..96051824,+	KCNIP3
uc002wny.2,uc010zrh.1	2	chr20:11871477..11907242,+	BTBD3
uc002woz.2,uc002wpb.2	2	chr20:13976146..16033839,+	MACROD2
uc010gag.2,uc002wfc.2	2	chr20:1422813..1448417,-	NSFL1C
uc010gci.1,uc002wpf.1	2	chr20:16252749..16554078,-	KIF16B
uc002wqh.2,uc010gcp.2	2	chr20:17949762..17971759,+	C20orf72
uc002wro.1,uc010gcu.1	2	chr20:19870210..19983100,+	RIN2
uc002wde.1,uc010zpj.1	2	chr20:251524..271390,-	C20orf96
uc002wgh.2,uc010zpy.1	2	chr20:2633254..2639038,+	NOP56
uc002wxf.2,uc002wxg.2	2	chr20:30598245..30619984,+	C20orf160
uc002wxq.2,uc010ztw.1	2	chr20:30865467..30922809,+	KIF3B
uc002wze.1,uc002wzj.1	2	chr20:32077928..32237837,+	CBFA2T2
uc002wii.2,uc002wij.3	2	chr20:3229948..3388587,-	C20orf194
uc002xeo.2,uc002xen.1	3	chr20:34541546..34547394,-	SCAND1
uc002xex.2,uc002xez.2	2	chr20:34679426..34820720,+	EPB41L1
uc002wit.2,uc002wiq.1	2	chr20:3648618..3662738,-	ADAM33
uc002wja.2,uc002wjb.1	2	chr20:3667619..3687775,-	SIGLEC1
uc002xje.2,uc010ggc.2	4	chr20:37434348..37551666,+	PPP1R16B
uc002wdp.3,uc002wdo.2	4	chr20:388709..411608,+	RBCK1
uc002wkj.2,uc002wki.2	2	chr20:3912069..3996216,-	RNF24
uc010zwg.1,uc002xki.2	5	chr20:42086504..42092242,+	SFRS6
uc010zwj.1,uc002xlb.1	2	chr20:42295709..42345122,+	MYBL2
uc002xnb.2,uc010ggy.2	3	chr20:43595120..43708591,+	STK4
uc002xrt.1,uc010zxq.1	2	chr20:44994690..45061704,-	ELMO2
uc002xsf.1,uc002xse.1	2	chr20:45186463..45313107,-	SLC13A3
uc002xtw.1,uc002xtv.1	3	chr20:47240793..47444420,-	PREX1
uc002wlg.1,uc010zqr.1	2	chr20:4833002..4990939,-	SLC23A2
uc002xuv.1,uc010gid.2	3	chr20:48429250..48508772,+	SLC9A8
uc002xvp.1,uc002xvr.2	3	chr20:49411467..49493713,+	BCAS4
uc002xwg.1,uc002xwf.1	2	chr20:50213314..50384908,-	ATP9A
uc002xwl.2,uc002xwj.2	3	chr20:50700551..50808524,-	ZFP64
uc002xxm.1,uc002xxl.1	2	chr20:54967427..54979582,+	CSTF1
uc002xya.2,uc010zzi.1	2	chr20:55204358..55214336,+	TFAP2C
uc002xyr.2,uc002xys.2	3	chr20:56223454..56286541,-	PMEPA1
uc002yav.2,uc002yay.2	2	chr20:58152564..58422764,+	PHACTR3
uc010gbr.2,uc002wmn.3	5	chr20:5986739..6020694,+	CRLS1
uc002yfg.2,uc011aay.1	3	chr20:62159778..62168707,-	PTK6
uc010gkk.1,uc002ygj.2	4	chr20:62338794..62370459,+	ZGPAT
uc002yki.2,uc002ykj.1	4	chr21:18885330..18965897,+	CXADR
uc002yma.2,uc011acg.1	2	chr21:27252862..27543446,-	APP
uc002ymy.2,uc011acn.1	2	chr21:30396938..30426805,+	USP16
uc002yng.2,uc010glp.2	2	chr21:30449812..30548200,+	C21orf7
uc002ytw.2,uc002ytu.3	2	chr21:35747749..35775074,+	FAM165B
uc002yub.2,uc002yuc.2	8	chr21:35888786..35987382,-	RCAN1
uc002yvz.2,uc002ywc.2	3	chr21:38445571..38575406,+	TTC3
uc002yxs.2,uc002yxt.3	2	chr21:40752213..40769814,+	WRB
uc002yya.2,uc002yxz.2	9	chr21:40817797..40887426,+	SH3BGR
uc002zcn.2,uc002zcm.2	3	chr21:44313378..44329772,+	NDUFV3
uc002zhi.2,uc002zhg.2	5	chr21:46825097..46933633,+	COL18A1
uc002zhu.1,uc002zhw.1	3	chr21:47401663..47424963,+	COL6A1
uc002zhz.1,uc002zia.1	3	chr21:47518033..47552763,+	COL6A2
uc002zmw.2,uc002zna.2	2	chr22:18111682..18211987,+	BCL2L13
uc002zri.2,uc002zrj.2	3	chr22:20067834..20099398,+	DGCR8
uc002zvt.3,uc002zvr.2	2	chr22:22311404..22337193,-	TOP3B
uc011aim.1,uc011aip.1	3	chr22:22380820..23265082,+	LOC96610
uc002zyn.3,uc002zyo.3	2	chr22:24199059..24227723,+	SLC2A11
uc003afk.2,uc011ako.1	3	chr22:29723671..29784569,-	AP1B1
uc011alg.1,uc003ajk.1	2	chr22:31477305..31500743,+	SMTN
uc003akb.2,uc003ake.2	6	chr22:31556138..31603004,+	RNF185
uc003akk.2,uc003aki.2	4	chr22:31608250..31676064,+	LIMK2
uc003aks.2,uc003akr.2	2	chr22:31721791..31742249,-	PATZ1
uc011alz.1,uc003amc.2	2	chr22:32439037..32509009,+	SLC5A1
uc003aos.2,uc003aot.2	2	chr22:36536372..36562225,-	APOL3
uc003apn.3,uc003apm.3	2	chr22:36883234..36903148,-	FOXRED2
uc003arf.2,uc010gxe.2	2	chr22:37678495..37711388,+	CYTH4
uc003auf.2,uc003auh.2	4	chr22:38245370..38284637,+	EIF3L
uc003axq.3,uc003axo.3	2	chr22:39745954..39781591,+	SYNGR1
uc003azf.1,uc003azh.2	3	chr22:41253094..41363888,+	XPNPEP3
uc010gyq.2,uc003bbn.2	4	chr22:42334749..42343148,-	CENPM
uc003bdm.1,uc003bdl.1	2	chr22:43528212..43539403,-	MCAT
uc003bfk.2,uc003bfl.2	2	chr22:45148438..45258662,+	ARHGAP8
uc003bhx.2,uc003bhy.2	3	chr22:47022658..47075687,+	GRAMD4
uc003bim.3,uc003bio.3	2	chr22:48885288..49147742,+	FAM19A5
uc010hap.2,uc003bjy.2	2	chr22:50639408..50656044,+	SELO
uc003bkb.1,uc010has.1	2	chr22:50656118..50683400,-	TUBGCP6
uc003bmu.2,uc003bmp.2	2	chr22:51007291..51021428,-	CHKB-CPT1B
uc003duj.2,uc003dum.2	4	chr3:100468181..100712334,-	ABI3BP
uc003dvb.2,uc003dva.2	3	chr3:101293042..101313279,+	PCNP
uc003dvx.2,uc010hpp.2	3	chr3:105085713..105295743,+	ALCAM
uc003dyc.2,uc003dyj.2	3	chr3:111451327..111695362,+	PHLDB2
uc003ean.1,uc011bij.1	2	chr3:113437841..113465096,-	NAA50
uc003eas.2,uc003eaq.3	2	chr3:113547029..113666020,+	GRAMD1C
uc003eff.3,uc003efg.2	2	chr3:122246762..122283523,-	PARP9
uc003efk.2,uc010hrj.2	2	chr3:122283185..122294047,+	DTX3L
uc011bjv.1,uc003egl.2	3	chr3:123331145..123603149,-	MYLK
uc003ehv.3,uc003ehu.3	5	chr3:124801482..124998091,-	SLC12A8
uc003eil.2,uc011bkh.1	2	chr3:125725201..125820400,-	SLC41A3
uc003eiv.2,uc003eix.2	2	chr3:126156445..126194762,-	ZXDC
uc003emn.2,uc003ems.2	2	chr3:129158968..129239190,+	IFT122
uc003emz.3,uc011blc.1	4	chr3:129366637..129612403,-	TMCC1
uc011ava.1,uc011avb.1	7	chr3:13573824..13679921,+	FBLN2
uc003erh.2,uc011bme.1	3	chr3:136581073..136667967,+	NCK1
uc003erp.1,uc010hue.1	2	chr3:137717658..137752494,+	CLDN18
uc011bog.1,uc011boi.1	4	chr3:153839149..153975616,+	SGEF
uc003caj.1,uc011avy.1	2	chr3:15708744..15901053,-	ANKRD28
uc003fgs.2,uc003fgt.2	2	chr3:169940220..170023770,+	PRKCI
uc003fgy.2,uc003fgx.2	2	chr3:170136653..170578169,+	CLDN11
uc003fhc.3,uc003fhb.3	2	chr3:170582667..170588045,-	RPL22L1
uc003fil.1,uc003fim.1	2	chr3:172468532..172539263,+	ECT2
uc003fix.3,uc011bpz.1	2	chr3:176738543..176915048,-	TBL1XR1
uc003fjv.3,uc003fju.3	2	chr3:179113877..179169371,-	GNB4
uc003fku.2,uc003fkt.2	3	chr3:180701503..180707530,-	DNAJC19
uc003fnn.1,uc011brk.1	3	chr3:184017022..184026840,+	PSMD2
uc003fpb.1,uc010hye.1	2	chr3:184529931..184770402,+	VPS8
uc003frd.2,uc003frc.2	4	chr3:186648516..186796339,+	ST6GAL1
uc003frh.1,uc003frj.2	2	chr3:186935938..187009752,-	MASP1
uc003fsv.2,uc003fsw.2	5	chr3:191046874..191116458,+	CCDC50
uc003fwa.3,uc011btr.1	2	chr3:195776156..195809032,-	TFRC
uc003fwd.2,uc003fwe.2	2	chr3:195943383..195960299,+	OSTalpha
uc003fxk.3,uc003fxl.3	2	chr3:196730157..196756686,-	MFI2
uc003fxn.3,uc011bud.1	3	chr3:196769432..197026143,-	DLG1
uc011bug.1,uc003fxy.2	2	chr3:197319987..197354752,-	LOC220729
uc003fyo.2,uc003fym.2	2	chr3:197615947..197686886,-	IQCG
uc003cfc.1,uc010hfw.1	3	chr3:32726698..32815354,+	CNOT10
uc003cfn.2,uc003cfl.3	3	chr3:33155450..33189264,+	CRTAP
uc003cgh.1,uc011aya.1	2	chr3:36422097..36589496,+	STAC
uc003cki.2,uc003ckg.2	2	chr3:40498801..40503858,+	RPL14
uc003cmv.2,uc010hil.2	2	chr3:43407819..43663560,-	ANO10
uc003con.2,uc003com.2	2	chr3:45123770..45187914,-	CDCP1
uc003cqp.2,uc010hjo.1	2	chr3:47021173..47051193,+	NBEAL2
uc003crh.1,uc003crg.2	2	chr3:47455184..47517445,-	SCAP
uc003ctm.1,uc003ctp.1	2	chr3:48509197..48542228,-	SHISA5
uc003cvj.2,uc011bby.1	2	chr3:49044637..49053386,+	WDR6
uc003cvq.2,uc003cvn.2	2	chr3:49057908..49060924,+	NDUFAF3
uc003cxm.1,uc011bcv.1	2	chr3:49761728..49823975,-	IP6K1
uc003dap.2,uc003dao.2	3	chr3:50400233..50540892,-	CACNA2D2
uc003den.2,uc003dem.2	2	chr3:52558386..52569093,-	NT5DC2
uc003deq.2,uc003dex.2	2	chr3:52579368..52719866,-	PBRM1
uc003dhn.2,uc003dhm.2	2	chr3:55499744..55521331,-	WNT5A
uc003dib.3,uc003die.3	2	chr3:56654161..56717135,-	C3orf63
uc003dkn.2,uc010hnm.2	4	chr3:58549847..58613337,-	FAM107A
uc011bga.1,uc003dnu.2	4	chr3:69219146..69591733,-	FRMD4B
uc003dob.2,uc003doe.2	3	chr3:69788633..70017486,+	MITF
uc003bsm.2,uc003bsh.2	3	chr3:9791628..9808352,+	OGG1
uc003btw.2,uc003btx.2	3	chr3:9944303..9958082,+	IL17RE
uc003dts.2,uc003dtu.2	3	chr3:99979686..100044078,+	TBC1D23
uc010ilv.2,uc003hyb.2	4	chr4:106967233..107237861,-	TBCK
uc003hzy.3,uc010imk.2	4	chr4:110834040..110933411,+	EGF
uc003icr.3,uc003icu.3	4	chr4:120133782..120216672,+	USP53
uc003iew.2,uc003iex.2	2	chr4:123813805..123844123,-	NUDT6
uc003gde.3,uc010ibv.2	2	chr4:1341104..1381836,+	KIAA1530
uc003ilf.2,uc003ili.2	3	chr4:148653453..148993926,+	ARHGAP10
uc003ilj.3,uc010iph.2	3	chr4:148999916..149363643,-	NR3C2
uc003goc.1,uc010idw.1	2	chr4:15606154..15657013,-	FBXL5
uc003isi.2,uc011cka.1	2	chr4:170541722..170642156,+	CLCN3
uc010ica.2,uc003gdo.2	2	chr4:1723266..1746895,+	TACC3
uc003isz.3,uc011ckb.1	3	chr4:174089904..174245117,+	GALNT7
uc003gdu.2,uc003gds.3	3	chr4:1795039..1810599,+	FGFR3
uc011ckk.1,uc003ivs.1	6	chr4:184426220..184432249,+	ING2
uc003ivx.2,uc003ivy.2	2	chr4:184580446..184634744,+	C4orf41
uc003iwq.2,uc003iwr.1	2	chr4:185615220..185655286,-	MLF1IP
uc003iyq.2,uc003iyr.2	2	chr4:186990309..187006250,+	TLR3
uc011bxx.1,uc003gsk.1	2	chr4:30722037..31148421,+	PCDH7
uc003gaa.2,uc003gab.2	2	chr4:331596..377759,+	ZNF141
uc003gtv.2,uc011byi.1	2	chr4:39184024..39287429,+	WDR19
uc003gvo.2,uc003gvq.2	3	chr4:41258898..41270445,+	UCHL1
uc003gws.2,uc003gwq.2	2	chr4:42410392..42659122,-	ATP8A1
uc003han.3,uc003haa.2	3	chr4:54243820..55164411,+	PDGFRA
uc011cbv.1,uc003hka.2	3	chr4:77172853..77232282,+	STBD1
uc003gbj.2,uc003gbi.2	2	chr4:778746..819945,-	CPLX1
uc003how.2,uc003hoy.2	3	chr4:84457261..84527025,+	AGPAT9
uc003hql.1,uc010ikj.1	4	chr4:88082214..88141674,-	KLHL8
uc003hrt.2,uc011cdm.1	2	chr4:89378268..89427305,+	HERC5
uc003hrw.1,uc011cdo.1	3	chr4:89513647..89629686,+	HERC3
uc003hsb.1,uc011cdp.1	2	chr4:89647106..90032549,-	FAM13A
uc003hth.2,uc003hti.2	2	chr4:95373038..95589376,+	PDLIM5
uc003huf.3,uc010ild.2	3	chr4:99916788..99983959,+	METAP1
uc003ksj.2,uc011cwj.1	4	chr5:118788148..118878027,+	HSD17B4
uc003ktu.2,uc011cwy.1	2	chr5:125695788..125829851,+	GRAMD3
uc003kxr.2,uc003kxt.2	3	chr5:132086509..132113561,-	SEPT8
uc003kyg.2,uc003kyi.2	2	chr5:132332680..132362240,-	ZCCHC10
uc003lbt.2,uc010jeo.2	2	chr5:137087075..137090052,-	HNRNPA0
uc003ldh.2,uc003ldl.2	3	chr5:138089107..138270722,+	CTNNA1
uc003lfs.1,uc003lfx.1	2	chr5:139781429..139929163,+	ANKHD1-EIF4EBP3
uc003lge.1,uc003lgb.1	2	chr5:139937853..139944189,-	APBB3
uc003llp.2,uc011dbf.1	3	chr5:141232683..141257944,-	PCDH1
uc003lnb.2,uc011dbk.1	2	chr5:142657497..142815077,-	NR3C1
uc003jcm.2,uc003jcl.2	2	chr5:1461544..1524076,-	LPCAT1
uc003ltq.2,uc011dcq.1	2	chr5:150560614..150603654,-	CCDC69
uc003lws.2,uc011ddp.1	2	chr5:156693091..156822604,+	CYFIP2
uc003lxx.1,uc003lya.1	2	chr5:159614374..159665729,+	FABP6
uc003jfr.2,uc003jfs.2	2	chr5:16473148..16617118,-	FAM134B
uc003jft.3,uc011cnd.1	3	chr5:16662017..16936385,-	MYO10
uc003maf.2,uc003mah.2	2	chr5:169064251..169510384,+	DOCK2
uc003mau.2,uc011dev.1	2	chr5:170210723..170241048,+	GABRP
uc003mne.1,uc003mng.1	2	chr5:180650306..180662808,+	TRIM41
uc003jkl.3,uc003jkn.2	2	chr5:36876861..37065920,+	NIPBL
uc003jlg.1,uc003jlb.1	3	chr5:38258533..38465581,+	EGFLAM
uc003jmt.2,uc011cpq.1	2	chr5:42424026..42721925,+	GHR
uc003jnu.2,uc010ivn.2	2	chr5:43376750..43412488,-	CCL28
uc003jsi.3,uc011cqo.1	2	chr5:60047617..60140101,-	ELOVL7
uc003jdx.1,uc010itl.1	2	chr5:6714718..6757161,+	PAPD7
uc003jva.2,uc003jvd.2	2	chr5:67511604..67597647,+	PIK3R1
uc011csr.1,uc003kcz.3	4	chr5:72921983..73237413,+	RGNEF
uc003kdm.2,uc003kdl.2	2	chr5:74073401..74191788,-	FAM169A
uc003kek.2,uc003kel.2	5	chr5:75699149..76003955,+	IQGAP2
uc003kfs.2,uc011ctg.1	2	chr5:78293430..78365449,-	DMGDH
uc003jee.3,uc003jeg.3	2	chr5:7869217..7901233,+	MTRR
uc003kha.1,uc003khb.1	2	chr5:80256558..80521953,+	RASGRF2
uc003kho.2,uc010jar.2	2	chr5:80715673..81047072,-	SSBP2
uc003jbq.2,uc003jbl.2	2	chr5:863851..892939,-	BRD9
uc003kjw.2,uc003kjx.2	3	chr5:89854617..90460032,+	GPR98
uc010jbd.2,uc011cuj.1	3	chr5:92953432..93447404,-	FAM172A
uc003pqu.1,uc010kcx.1	2	chr6:105175968..105307794,-	HACE1
uc003pre.2,uc003prd.2	2	chr6:106534195..106557814,+	PRDM1
uc003psu.2,uc003pst.3	3	chr6:109307647..109415277,-	SESN1
uc003pwt.2,uc011ebf.1	4	chr6:116575336..116759440,+	DSE
uc003pzu.1,uc003pzw.1	2	chr6:125474879..125584644,+	TPD52L1
uc003qdw.1,uc010kgd.1	3	chr6:133090507..133119747,-	C6orf192
uc003qme.1,uc003qmf.1	2	chr6:148663729..148873184,+	SASH1
uc003qoi.2,uc011eeq.1	2	chr6:151725989..151773316,-	RMND1
uc003qph.2,uc003qpg.2	5	chr6:153291660..153304740,-	FBXO5
uc003qqt.2,uc010kjn.2	3	chr6:157802557..158094976,+	ZDHHC14
uc003qxg.1,uc011ehb.1	3	chr6:170151721..170181617,+	C6orf70
uc003qxp.2,uc011ehd.1	2	chr6:170615844..170714236,+	FAM120B
uc003ndx.2,uc003ndw.2	2	chr6:24171984..24383520,-	DCDC2
uc003nfk.3,uc003nfi.3	2	chr6:25845330..25874471,-	SLC17A3
uc003nhp.2,uc011dkd.1	2	chr6:26365398..26378546,+	BTN3A2
uc003mug.2,uc003muf.2	3	chr6:2887506..2903545,-	SERPINB9
uc003nmt.3,uc003nms.3	2	chr6:29523390..29600962,-	GABBR1
uc011dmb.1,uc003raj.3	3	chr6:29794756..29977731,+	HLA-G
uc011dnm.1,uc003ntn.3	2	chr6:31462658..31478898,+	MICB
uc003nvl.2,uc003nvk.2	2	chr6:31620221..31625986,+	APOM
uc003nxe.2,uc003nxf.1	2	chr6:31745299..31763712,-	VARS
uc003oal.1,uc003oar.2	2	chr6:32148746..32152023,-	AGER
uc003odf.2,uc003odh.2	2	chr6:33168603..33172213,+	SLC39A7
uc003oed.2,uc011drd.1	2	chr6:33286336..33290793,-	DAXX
uc003okx.2,uc011dtf.1	4	chr6:35541362..35696360,-	FKBP5
uc003omy.2,uc003omx.2	2	chr6:36839646..36896738,+	C6orf89
uc010jwx.2,uc003ony.3	2	chr6:38136228..38607924,-	BTBD9
uc011dhv.1,uc003mvv.2	2	chr6:4021569..4065216,+	PRPF4B
uc003orp.2,uc003orn.2	3	chr6:41902672..42016610,-	CCND3
uc003oth.2,uc010jyd.2	3	chr6:42952330..42980078,+	PPP2R5D
uc003owf.2,uc003owk.2	4	chr6:43737953..43754221,+	VEGFA
uc003oxa.1,uc003oxc.1	2	chr6:44214849..44221614,+	HSP90AB1
uc003oxd.2,uc011dvu.1	2	chr6:44221839..44225283,-	SLC35B2
uc003oyc.1,uc003oyb.1	4	chr6:46188469..46459711,-	RCAN2
uc003oyq.3,uc011dwk.1	2	chr6:46820242..46922675,-	GPR116
uc003oyt.2,uc011dwl.1	3	chr6:46967814..47010082,-	GPR110
uc003mtd.2,uc011dho.1	3	chr6:485139..693109,-	EXOC2
uc003mwu.2,uc003mwt.2	8	chr6:5998235..6007633,-	NRN1
uc003mxp.1,uc003mxq.1	2	chr6:7541870..7586946,+	DSP
uc003pir.2,uc003pio.3	2	chr6:79644137..79788011,-	PHIP
uc003pjl.1,uc011dyu.1	3	chr6:82879956..82957448,-	IBTK
uc010kcb.2,uc003pnc.2	2	chr6:90036345..90062619,-	UBE2J1
uc003pqe.2,uc003pqd.2	2	chr6:99990264..100016690,-	CCNC
uc003uvo.2,uc003uvp.1	2	chr7:100199882..100205801,+	PCOLCE
uc003uxi.2,uc003uxe.2	3	chr7:100487616..100494539,-	ACHE
uc003uyt.2,uc003uyz.2	2	chr7:101459292..101927249,+	CUX1
uc003sjs.2,uc003sju.2	3	chr7:1036623..1177893,-	C7orf50
uc003vcm.2,uc010ljg.2	2	chr7:104654637..104754531,+	MLL5
uc003vda.1,uc010ljj.1	2	chr7:105172532..105208124,+	RINT1
uc003vej.2,uc011klz.1	3	chr7:107220422..107263762,+	BCAP29
uc003vgn.2,uc011kmr.1	2	chr7:112405789..112430478,-	TMEM168
uc003vif.1,uc010lkf.1	3	chr7:115929906..116201230,+	CAV1
uc003vkr.2,uc003vks.2	2	chr7:123181084..123197958,-	NDUFA5
uc003ssn.3,uc003sso.3	3	chr7:12596187..12693225,+	SCIN
uc003vor.2,uc003vos.2	2	chr7:128828713..128853383,+	SMO
uc003vot.2,uc003vov.2	2	chr7:128864864..129070051,+	AHCYL2
uc003vqg.2,uc003vqc.2	5	chr7:130126046..130146129,+	MEST
uc003vse.2,uc010lmn.2	3	chr7:134464171..134655470,+	CALD1
uc003vtw.2,uc003vtv.2	2	chr7:137559727..137686846,-	CREB3L2
uc003vun.2,uc003vuo.2	3	chr7:138728268..138794465,-	ZC3HAV1
uc003vvm.2,uc010lng.2	2	chr7:139784548..139876741,-	JHDM1D
uc003vvo.2,uc003vvn.2	3	chr7:140033554..140098311,-	SLC37A3
uc003wco.2,uc011ktb.1	2	chr7:142985402..143004784,+	CASP2
uc003wey.2,uc003wez.2	3	chr7:148395006..148498201,+	CUL1
uc003wif.2,uc011kuy.1	3	chr7:150688144..150711686,+	NOS3
uc003wjr.1,uc003wjq.1	2	chr7:150929575..150935905,+	CHPF2
uc003wkk.2,uc003wki.2	3	chr7:151253203..151574316,-	PRKAG2
uc010lqg.1,uc011kvm.1	2	chr7:151722778..151819427,+	GALNT11
uc003wlg.1,uc003wle.1	4	chr7:152456851..152552463,+	ACTR3B
uc010lqk.1,uc003wmg.2	2	chr7:155437203..155574179,+	RBM33
uc003stv.2,uc010kub.2	2	chr7:17830386..17980131,-	SNX13
uc003svs.3,uc003svq.2	4	chr7:23145353..23215036,+	KLHL7
uc003tak.2,uc011jzx.1	2	chr7:29959720..30029905,-	SCRN1
uc003tar.1,uc010kvr.1	6	chr7:30174552..30202381,+	C7orf41
uc003tdc.2,uc011kaj.1	2	chr7:32956428..32982782,-	RP9P
uc003thn.1,uc003thp.1	3	chr7:40174575..40900357,+	C7orf10
uc003tlk.2,uc003tli.2	2	chr7:44618763..44621827,-	TMED4
uc003tln.2,uc011kby.1	4	chr7:44646171..44748668,+	OGDH
uc003tlw.2,uc010kyl.2	2	chr7:44836241..44842715,+	PPIA
uc003tlz.2,uc003tma.2	4	chr7:44866488..44887725,-	H2AFV
uc003tnb.2,uc003tnc.2	2	chr7:45197367..45223847,+	RAMP3
uc003tol.2,uc003too.2	2	chr7:48128355..48148329,+	UPP1
uc003tuo.2,uc003tup.2	2	chr7:65540776..65558321,+	ASL
uc010lag.2,uc003tvh.2	2	chr7:66093890..66276446,+	RABGEF1
uc003tvn.2,uc011kef.1	2	chr7:66461817..66704496,+	TYW1
uc011kes.1,uc011ker.1	2	chr7:72634674..72648752,+	NCF1B
uc003ubd.1,uc003ubh.2	2	chr7:74210484..74267841,-	GTF2IRD2
uc003ufb.2,uc003ufa.2	4	chr7:76018647..76039012,-	SRCRB4D
uc003ufd.3,uc003ufc.3	7	chr7:76026841..76071387,+	ZP3
uc003ufo.2,uc003ufq.2	2	chr7:76139745..76157197,+	UPK3B
uc003ugf.2,uc011kgo.1	2	chr7:76940070..77045717,-	PION
uc003uit.2,uc003uis.3	2	chr7:86974951..87029112,+	CROT
uc003ujq.1,uc010lej.1	3	chr7:87834432..87856308,-	SRI
uc003sjo.3,uc010ksc.2	3	chr7:937538..1015235,-	ADAP1
uc003uoa.2,uc003unz.2	2	chr7:95212815..95225925,-	PDK4
uc003uov.3,uc011kin.1	2	chr7:97481443..97501854,-	ASNS
uc003usv.1,uc003usw.1	4	chr7:99690404..99699427,-	MCM7
uc003yjs.1,uc011lhd.1	2	chr8:101715144..101734315,-	PABPC1
uc003ylj.2,uc011lho.1	2	chr8:104310667..104345092,+	FZD6
uc003ymn.2,uc011lhv.1	3	chr8:108261711..108510254,-	ANGPT1
uc003wtm.2,uc011kxa.1	2	chr8:11142000..11185652,+	MTMR9
uc010mdb.1,uc010mda.1	2	chr8:119201695..119634234,-	SAMD12
uc003yqu.2,uc003yqt.2	2	chr8:124693035..124749647,-	ANXA13
uc003wwk.1,uc011kxx.1	5	chr8:12940872..13372429,-	DLC1
uc003yum.2,uc003yuk.2	6	chr8:134467091..134584183,-	ST3GAL1
uc003yxd.1,uc003yxa.2	2	chr8:143845758..143859640,-	LYNX1
uc003yzp.1,uc003yzn.1	2	chr8:144873090..144897549,-	SCRIB
uc003zcq.2,uc003zcn.2	3	chr8:145635777..145642273,-	SLC39A4
uc003zdh.3,uc011llj.1	2	chr8:145728356..145732554,+	GPT
uc003zdk.1,uc003zdo.2	2	chr8:145743391..145750557,+	LRRC14
uc003wzb.2,uc003wzc.2	3	chr8:19171207..19253314,+	SH2D4A
uc003xas.2,uc003xat.2	2	chr8:21971934..21988565,-	HR
uc003xcy.2,uc003xcx.2	3	chr8:22941868..22974948,+	TNFRSF10C
uc003xeo.2,uc011lad.1	2	chr8:25285366..25315920,-	KCTD9
uc003xie.1,uc003xib.2	3	chr8:30241944..30429734,+	RBPMS
uc003xkj.2,uc010lvy.2	3	chr8:37654424..37701492,+	GPR124
uc003xlf.3,uc010lwd.2	4	chr8:38120652..38126738,-	PPAPDC1B
uc003xmb.3,uc003xma.2	2	chr8:38585704..38710545,+	TACC1
uc003xmi.3,uc011lce.1	2	chr8:38758753..38831428,+	PLEKHA2
uc003xmr.2,uc003xms.2	2	chr8:38854505..38962777,+	ADAM9
uc003xqx.3,uc011ldm.1	2	chr8:52730141..52811735,-	PCMTD1
uc003xuj.2,uc003xum.2	2	chr8:62413116..62627199,-	ASPH
uc003xuy.2,uc003xva.2	3	chr8:64081121..64125345,+	YTHDF3
uc003xvp.2,uc003xvq.2	2	chr8:66629906..66753755,-	PDE7A
uc003xwb.3,uc011les.1	5	chr8:67344718..67381042,+	ADHFE1
uc003xyg.2,uc003xyi.1	3	chr8:70378859..70573147,+	SULF1
uc003ycj.1,uc003yck.1	3	chr8:82613958..82633530,-	ZFAND1
uc010mab.2,uc003ycz.3	2	chr8:86089619..86126751,+	E2F5
uc003yee.2,uc003yef.2	5	chr8:90769975..90803291,+	RIPK2
uc004axj.2,uc011luy.1	2	chr9:100174302..100258403,+	TDRD7
uc004azf.2,uc004azg.2	2	chr9:101978708..101984246,-	ALG2
uc004bas.2,uc011lvf.1	3	chr9:103064359..103115259,-	TEX10
uc004bds.3,uc004bdr.3	2	chr9:111777416..111882225,-	C9orf5
uc004bfm.2,uc004bfl.2	2	chr9:114393632..114416629,+	DNAJC25
uc004bia.2,uc011lxh.1	2	chr9:116207011..116360017,+	RGS3
uc010mvf.2,uc004bjj.3	6	chr9:117782806..117880486,-	TNC
uc004bjz.2,uc004bkb.2	2	chr9:120466460..120479764,+	TLR4
uc004bkf.2,uc010mvi.2	2	chr9:123151148..123342437,-	CDK5RAP2
uc011lyf.1,uc004bkt.2	5	chr9:123617931..123639606,-	PHF19
uc011lzh.1,uc011lzj.1	3	chr9:125703112..125867146,+	RABGAP1
uc004bnz.1,uc004boa.1	2	chr9:126141933..126692417,-	DENND1A
uc004bte.2,uc004btb.2	5	chr9:130830479..130871523,+	SLC25A25
uc010myj.2,uc010myl.2	3	chr9:131549510..131572710,+	TBC1D13
uc004cby.1,uc004cbx.1	2	chr9:135753750..135765421,+	C9orf9
uc004cca.2,uc011mcq.1	3	chr9:135766735..135820020,-	TSC1
uc004cda.1,uc011mcz.1	4	chr9:136130563..136150630,-	ABO
uc004cmp.2,uc004cmt.3	3	chr9:140201348..140317714,-	EXD3
uc010ncj.1,uc011mfa.1	2	chr9:140354405..140444986,-	PNPLA7
uc003zlw.3,uc003zlz.3	2	chr9:15464066..15511003,-	PSIP1
uc011llw.1,uc003zhg.2	2	chr9:2015342..2193621,+	SMARCA2
uc003zgf.2,uc003zgk.2	2	chr9:214865..465259,+	DOCK8
uc003ztq.1,uc003zto.1	2	chr9:33921691..34048947,-	UBAP2
uc003zwf.2,uc003zwd.2	2	chr9:35088687..35096579,-	PIGO
uc003zxw.2,uc003zxx.1	2	chr9:35736864..35749983,-	GBA2
uc010mli.2,uc011lpl.1	2	chr9:36214441..36277041,-	GNE
uc003zzq.2,uc011lqh.1	2	chr9:37120469..37358143,+	ZCCHC7
uc010mlz.2,uc004aao.2	2	chr9:37800551..37867663,+	DCAF10
uc003zgn.1,uc010mgx.1	4	chr9:470294..746104,+	KANK1
uc003ziq.1,uc003zir.1	5	chr9:4711158..4742043,-	AK3
uc003zkh.2,uc011lml.1	2	chr9:6716495..7175647,+	KDM4C
uc004ahe.2,uc010mom.1	2	chr9:71736224..71870118,+	TJP2
uc011ltb.1,uc004aob.1	2	chr9:87283466..87638505,+	NTRK2
uc004aoq.2,uc010mqe.2	2	chr9:88902650..88969378,-	ZCCHC6
uc004apc.2,uc011lth.1	3	chr9:90112658..90323548,+	DAPK1
uc004apr.2,uc004apu.2	4	chr9:90581361..90589667,-	CDK20
uc004arb.2,uc011ltr.1	2	chr9:93564012..93660833,+	SYK
uc004arf.3,uc011ltu.1	2	chr9:93976099..94124206,-	AUH
uc004aso.1,uc004asp.1	4	chr9:95473645..95527083,-	BICD2
uc004asz.2,uc011luc.1	3	chr9:95709601..95798518,+	FGD3
uc004cug.1,uc004csz.3	2	chrX:10413597..10851809,-	MID1
uc004eng.2,uc004enf.2	2	chrX:106956460..107019202,-	TSC22D3
uc004enr.2,uc004enu.2	3	chrX:107334934..107397895,+	ATG4A
uc011mso.1,uc011msp.1	4	chrX:107683154..107940775,+	COL4A5
uc004eom.2,uc004eol.2	4	chrX:109245863..109416773,+	TMEM164
uc004cup.1,uc004cun.1	2	chrX:11155663..11683821,-	ARHGAP6
uc004eqp.2,uc004eqq.2	2	chrX:117629872..117820123,+	DOCK11
uc004esv.2,uc010nqq.2	2	chrX:119658448..119709684,-	CUL4B
uc004ewq.3,uc004ewo.2	2	chrX:131337054..131353475,-	RAP2C
uc004exe.1,uc004exd.1	4	chrX:132669776..133119666,-	GPC3
uc004fab.2,uc011mwe.1	3	chrX:135747714..135863503,-	ARHGEF6
uc011myk.1,uc004fgx.2	3	chrX:152082997..152142022,+	ZNF185
uc004fmt.2,uc004fms.2	4	chrX:154064070..154255215,-	F8
uc004dae.2,uc010nfr.2	2	chrX:21857656..21903540,+	MBTPS2
uc004dap.2,uc004dan.2	2	chrX:23721778..23761407,-	ACOT9
uc004ddh.2,uc010ngs.2	2	chrX:34645183..34675405,-	TMEM47
uc004deg.3,uc004deh.2	5	chrX:38420731..38548171,+	TSPAN7
uc004dfe.2,uc011mks.1	2	chrX:41192651..41223724,+	DDX3X
uc004dhk.3,uc004dhm.2	2	chrX:47050199..47074526,+	UBA1
uc004djk.3,uc010nid.2	2	chrX:48316928..48328644,-	SLC38A5
uc004dqh.2,uc004dqg.2	2	chrX:52238818..52243951,+	XAGE1D
uc004eaa.1,uc004eac.2	4	chrX:70752933..70795740,+	OGT
uc004csu.1,uc011mic.1	2	chrX:9754496..9917481,+	SHROOM2
uc004csx.3,uc010ndt.2	3	chrX:9983795..10112517,+	WWC3
uc004ege.3,uc004egc.2	3	chrX:99929491..99987131,-	SYTL4
uc004fug.2,uc004fuf.2	2	chrY:21867303..21906825,-	KDM5D
