# Supplementary material for: The Landscape of Isoform Switches in Human Cancers
Source: Oxford University Press journal article supplement (doi:10.1158/1541-7786.mcr-16-0459), 2017-06-05
Supplement: 15417786mcr160459-sup-175983_2_unknown_upload_4059092_tqgtxt.xlsx [file 15417786mcr160459-sup-175983_2_unknown_upload_4059092_tqgtxt.xlsx]

## Sheet: Sheet1
Switch Info			Pan Cancer Survival Summary		Hazard ratio anaysis					Survival Analysis													Isoform switch frequency in patient cohorts
switch	gene_id	gene_name	TruePanCancer	Decomposable	hazard_ratio	hazard_ratio_ci_low	hazard_ratio_ci_high	hazard_p_value	hazard_q_value	survival_diff_likelyhood_p_value	survival_diff_likelyhood_q_value	median_survival_wo_switch_year	median_survival_w_switch_year	median_survival_rate	two_year_survival_rate_wo_switch	two_year_survival_rate_w_switch	two_year_survival_rate	five_year_survival_rate_wo_switch	five_year_survival_rate_w_switch	five_year_survival_rate	relative_risk	odds_ratio	BRCA	COAD	HNSC	KICH	KIRC	KIRP	LIHC	LUAD	LUSC	PRAD	STAD	THCA	PanCancer	No switch
uc010yzf.1,uc002tob.1	chr2:127805607..127864864,-	BIN1	Yes	Yes	1.409	1.145	1.736	0.0012301	0.0322134	0.00170926	0.0395108	2.99	1.86	0.622	0.83	0.76	0.915663	0.66	0.49	0.742424	1.653	1.998	26	3	3	2	146	30	128	30	7	2	7	6	390	4842
uc010lej.1,uc003ujq.1	chr7:87834432..87856308,-	SRI	Yes	Yes	1.314	1.112	1.551	0.00129974	0.0336861	0.00165242	0.0391905	2.84	1.96	0.69	0.85	0.77	0.905882	0.68	0.55	0.808824	1.346	1.474	188	1	43	9	151	82	9	347	386	86	0	75	1377	3855
uc002pbv.2,uc002pbs.1	chr19:45912872..45982086,-	ERCC1	Yes	Yes	1.278	1.105	1.478	0.000919595	0.025976	0.000836625	0.0253407	2.86	1.83	0.64	0.84	0.77	0.916667	0.66	0.6	0.909091	1.194	1.26	302	53	95	42	20	71	107	180	147	6	19	49	1091	4141
uc003xum.2,uc003xun.2	chr8:62413116..62627199,-	ASPH	Yes	Yes	1.401	1.132	1.732	0.00190241	0.0415883	0.000103335	0.00729884	2.94	2.1	0.714	0.83	0.84	1.01205	0.65	0.64	0.984615	1.023	1.029	5	1	5	29	190	57	76	28	5	5	3	221	625	4607
uc010sdl.1,uc001qid.1	chr12:329791..372002,-	SLC6A13	Yes	Yes	1.467	1.206	1.786	0.000131267	0.00750014	7.48304e-05	0.0060685	2.94	2.11	0.718	0.83	0.79	0.951807	0.66	0.53	0.80303	1.613	1.922	0	0	0	14	216	53	0	67	73	0	0	54	477	4755
uc001arp.1,uc001aro.2	chr1:10696668..10856707,-	CASZ1	Yes	Yes	1.466	1.238	1.735	8.8416e-06	0.00135944	4.58225e-06	0.00109387	2.86	2.1	0.734	0.83	0.79	0.951807	0.66	0.59	0.893939	1.332	1.459	62	11	27	12	309	168	23	82	85	21	2	113	915	4317
uc004azg.2,uc004azf.2	chr9:101978708..101984246,-	ALG2	Yes	Yes	1.444	1.242	1.679	1.72821e-06	0.000620674	1.47031e-06	0.000528052	2.86	1.71	0.598	0.85	0.71	0.835294	0.68	0.47	0.691176	1.763	2.156	187	60	101	1	2	9	24	239	244	12	53	21	953	4279
uc001iar.2,uc001iat.2	chr1:244998639..245008357,+	FAM36A	Yes	Yes	1.402	1.221	1.61	1.62755e-06	0.000620674	1.04827e-06	0.000528052	2.84	1.96	0.69	0.86	0.72	0.837209	0.68	0.52	0.764706	1.739	2.104	50	165	210	58	160	118	43	57	154	9	58	9	1091	4141
uc001ffw.2,uc001ffx.2	chr1:154934775..154946959,-	SHC1	Yes	Yes	1.583	1.3	1.927	4.69705e-06	0.000843456	6.81186e-10	1.7125e-06	3	1.58	0.527	0.84	0.69	0.821429	0.67	0.41	0.61194	1.875	2.427	1	32	46	0	110	8	31	56	39	3	2	49	377	4855
uc002lro.2,uc002lrn.2	chr19:1241749..1244823,+	ATP5D	Yes	No	1.304	1.102	1.542	0.00195497	0.042369	0.00244027	0.0457823	3	1.54	0.513	0.84	0.69	0.821429	0.67	0.44	0.656716	1.751	2.166	15	18	39	6	46	9	108	84	169	20	27	0	541	4691
uc011kyu.1,uc010ltn.2	chr8:21911081..21940035,+	EPB49	Yes	No	1.604	1.185	2.172	0.00223465	0.0458329	0.00182636	0.0406326	3.04	1.56	0.513	0.83	0.77	0.927711	0.65	0.49	0.753846	1.352	1.498	47	0	0	1	47	19	0	24	17	3	0	2	160	5072
uc011jxa.1,uc003sqt.1	chr7:6728064..6746566,-	ZNF12	Yes	No	1.579	1.197	2.084	0.0012243	0.0322134	0.00180669	0.0405537	3.02	2.17	0.719	0.83	0.66	0.795181	0.65	0.47	0.723077	2.126	3.058	0	7	0	12	77	0	0	0	1	0	42	0	139	5093
uc003kix.2,uc003kiw.2	chr5:86564151..86687732,+	RASA1	Yes	No	1.523	1.195	1.942	0.000672967	0.0203836	0.00159117	0.0391162	3.02	1.64	0.543	0.83	0.74	0.891566	0.65	0.53	0.815385	1.515	1.763	0	23	38	4	55	0	0	5	0	0	46	69	240	4992
uc003xcx.2,uc003xcy.2	chr8:22941868..22974948,+	TNFRSF10C	Yes	No	1.268	1.106	1.454	0.000669192	0.0203836	0.000818923	0.0253407	2.76	2.03	0.736	0.85	0.78	0.917647	0.69	0.56	0.811594	1.434	1.6	270	119	137	8	91	148	159	301	303	111	5	6	1658	3574
uc003apm.3,uc003apn.3	chr22:36883234..36903148,-	FOXRED2	Yes	No	1.857	1.314	2.625	0.000454773	0.0155665	0.000774997	0.0246626	3.04	2.27	0.747	0.83	0.71	0.855422	0.65	0.4	0.615385	2.133	3.096	0	0	0	4	74	0	0	0	0	0	9	0	87	5145
uc003akj.2,uc003akh.2	chr22:31608250..31676064,+	LIMK2	Yes	No	1.426	1.172	1.735	0.000394194	0.0143624	0.000505853	0.0187017	2.96	1.65	0.557	0.85	0.7	0.823529	0.67	0.5	0.746269	1.739	2.129	11	102	0	0	44	81	1	136	336	11	0	9	731	4501
uc003fkq.2,uc003fks.2	chr3:180630452..180694948,+	FXR1	Yes	No	1.363	1.144	1.624	0.00052814	0.0171326	0.000362163	0.0151746	3	1.71	0.57	0.84	0.72	0.857143	0.67	0.46	0.686567	1.657	1.996	42	8	27	18	60	24	33	139	181	3	0	5	540	4692
uc002rqa.3,uc010ynk.1	chr2:37458774..37476301,+	C2orf56	Yes	No	1.976	1.408	2.774	8.29502e-05	0.00537531	0.000282185	0.0124459	3.03	1.98	0.653	0.83	0.76	0.915663	0.65	0.52	0.8	1.615	1.945	0	0	0	14	74	30	0	0	0	1	0	4	123	5109
uc009vzh.2,uc001cuj.2	chr1:53192131..53293011,+	ZYG11B	Yes	No	1.607	1.234	2.093	0.000433475	0.0153644	0.000223065	0.0107844	3	1.96	0.653	0.83	0.71	0.855422	0.65	0.49	0.753846	1.922	2.558	0	49	0	17	101	0	0	0	0	0	24	0	191	5041
uc010rcw.1,uc001mmq.3	chr11:17099277..17229530,-	PIK3C2A	Yes	No	1.766	1.321	2.36	0.000124309	0.00726776	0.000200501	0.00998935	3	2.42	0.807	0.83	0.75	0.903614	0.65	0.49	0.753846	1.932	2.583	0	28	0	11	131	0	0	0	0	0	0	0	170	5062
uc003xib.2,uc003xie.1	chr8:30241944..30429734,+	RBPMS	Yes	No	1.382	1.174	1.627	0.000100203	0.006117	0.000168073	0.00938967	2.89	2.05	0.709	0.84	0.77	0.916667	0.67	0.53	0.791045	1.572	1.836	65	112	0	4	254	73	50	198	56	21	0	5	838	4394
uc011cqo.1,uc003jsi.3	chr5:60047617..60140101,-	ELOVL7	Yes	No	1.904	1.352	2.681	0.000229021	0.0102814	0.00015152	0.00865732	3.03	2.54	0.838	0.83	0.72	0.86747	0.65	0.42	0.646154	2.308	3.588	0	0	0	2	95	0	0	0	0	0	0	0	97	5135
uc001gzx.2,uc001gzw.2	chr1:203595928..203713207,+	ATP2B4	Yes	No	1.707	1.335	2.182	1.97708e-05	0.00207099	0.000116961	0.00752442	3	2.08	0.693	0.83	0.79	0.951807	0.65	0.54	0.830769	1.568	1.853	5	70	6	13	95	7	0	7	10	23	5	28	269	4963
uc002iad.2,uc002hzz.2	chr17:40714092..40718294,+	COASY	Yes	No	1.473	1.238	1.751	1.19007e-05	0.00158428	0.000107421	0.00729884	2.96	1.82	0.615	0.84	0.77	0.916667	0.67	0.51	0.761194	1.468	1.673	29	36	24	12	171	85	81	144	19	8	3	31	643	4589
uc001ccf.1,uc001ccg.1	chr1:38326369..38412729,-	INPP5B	Yes	No	2.37	1.579	3.559	3.15768e-05	0.00305323	0.000106405	0.00729884	3.04	2.17	0.714	0.83	0.66	0.795181	0.65	0.32	0.492308	2.756	5.34	0	0	0	5	42	0	0	0	0	0	0	0	47	5185
uc002shi.1,uc002shj.2	chr2:71162998..71192560,+	ATP6V1B1	Yes	No	1.629	1.281	2.073	6.98612e-05	0.00523745	7.14787e-05	0.00601059	2.89	2.21	0.765	0.83	0.82	0.987952	0.66	0.58	0.878788	1.329	1.457	25	0	0	2	345	146	0	25	50	45	0	0	638	4594
uc002unw.2,uc002uny.2	chr2:182401402..182545381,-	CERKL	Yes	No	1.868	1.335	2.614	0.000265954	0.0109608	4.15817e-05	0.00435568	2.89	2.59	0.896	0.83	0.83	1	0.65	0.6	0.923077	1.398	1.565	0	0	0	60	345	120	0	0	0	0	0	0	525	4707
uc004bds.3,uc004bdr.3	chr9:111777416..111882225,-	C9orf5	Yes	No	1.696	1.333	2.159	1.75269e-05	0.00207099	3.3971e-05	0.00386062	3	1.87	0.623	0.83	0.68	0.819277	0.66	0.45	0.681818	2.077	2.91	0	16	0	9	137	0	0	14	1	0	43	0	220	5012
uc002ddm.2,uc002ddn.2	chr16:15489611..15503543,+	MPV17L	Yes	No	1.88	1.35	2.619	0.000187183	0.0090496	1.03795e-05	0.00163087	3.03	2.61	0.861	0.83	0.72	0.86747	0.65	0.48	0.738462	2.128	3.07	0	0	0	19	104	0	0	0	0	0	0	0	123	5109
uc003jlb.1,uc003jlg.1	chr5:38258533..38465581,+	EGFLAM	Yes	No	1.552	1.29	1.867	3.15981e-06	0.000671675	6.44083e-06	0.00124556	2.83	2.23	0.788	0.82	0.88	1.07317	0.64	0.68	1.0625	0.833	0.794	344	1	80	53	194	50	1	1	0	0	0	276	1000	4232
uc011llj.1,uc003zdh.3	chr8:145728356..145732554,+	GPT	Yes	No	1.298	1.105	1.525	0.00150909	0.0360985	4.78623e-06	0.00109387	2.76	2.09	0.757	0.84	0.8	0.952381	0.67	0.57	0.850746	1.34	1.467	281	159	279	21	217	93	118	0	0	103	14	0	1285	3947
uc009vtz.2,uc001bug.2	chr1:32573644..32642166,+	KPNA6	No	No	1.594	1.243	2.045	0.000241966	0.010488	0.00263704	0.0487464	3	1.87	0.623	0.83	0.69	0.831325	0.65	0.49	0.753846	1.864	2.429	11	7	18	9	123	0	0	6	8	0	33	0	215	5017
uc003sjm.3,uc003sjo.3	chr7:937538..1015235,-	ADAP1	No	No	1.452	1.153	1.829	0.00153796	0.0360985	0.00222211	0.0426099	3	1.86	0.62	0.83	0.78	0.939759	0.65	0.57	0.876923	1.325	1.455	29	28	15	13	55	74	0	7	4	17	49	10	301	4931
uc010ugd.1,uc002abx.3	chr15:52599480..52821247,-	MYO5A	No	No	1.65	1.241	2.195	0.000576001	0.0181008	0.00220065	0.0425572	3.02	2.17	0.719	0.83	0.74	0.891566	0.65	0.51	0.784615	1.817	2.338	6	23	0	10	78	22	0	9	5	0	1	0	154	5078
uc010rsn.1,uc001oyh.3	chr11:77033061..77185108,-	PAK1	No	No	1.381	1.125	1.695	0.0019923	0.042619	0.00216285	0.0425572	2.95	2.24	0.759	0.83	0.8	0.963855	0.65	0.58	0.892308	1.384	1.545	36	8	16	13	187	63	32	10	5	44	6	18	438	4794
uc001pua.2,uc001puc.2	chr11:118618473..118661972,-	DDX6	No	No	1.41	1.134	1.754	0.00200042	0.042619	0.00215567	0.0425572	2.98	2.03	0.681	0.83	0.75	0.903614	0.66	0.53	0.80303	1.615	1.934	29	27	22	17	160	23	0	13	12	0	34	0	337	4895
uc001rwt.1,uc001rwp.1	chr12:50794650..50873788,+	LARP4	No	No	1.646	1.26	2.149	0.000251386	0.0105331	0.00215029	0.0425572	3.02	1.86	0.616	0.83	0.74	0.891566	0.65	0.52	0.8	1.697	2.095	5	18	17	17	92	16	0	1	0	0	21	0	187	5045
uc010psd.1,uc001hfh.2	chr1:207207761..207254367,+	PFKFB2	No	No	1.494	1.152	1.939	0.00251461	0.0482638	0.00213953	0.0425572	2.93	2.55	0.87	0.83	0.82	0.987952	0.65	0.6	0.923077	1.498	1.728	3	3	2	34	279	66	0	3	11	0	1	12	414	4818
uc002aee.2,uc002aed.2	chr15:57210323..57580712,+	TCF12	No	No	1.416	1.128	1.778	0.00276949	0.0497321	0.00207636	0.0425572	2.99	1.82	0.609	0.83	0.79	0.951807	0.66	0.51	0.772727	1.521	1.771	40	69	14	13	97	5	0	33	22	0	1	5	299	4933
uc001tqo.2,uc001tqp.3	chr12:110810705..110841535,-	ANAPC7	No	No	1.33	1.108	1.597	0.00216766	0.0450372	0.00204094	0.0425572	2.95	1.86	0.631	0.83	0.77	0.927711	0.67	0.51	0.761194	1.478	1.692	35	5	1	1	190	103	13	51	142	19	0	7	567	4665
uc002kms.1,uc010wzh.1	chr18:5392388..5630642,-	EPB41L3	No	No	1.314	1.111	1.554	0.00143342	0.0346502	0.00203861	0.0425572	2.84	2.17	0.764	0.84	0.79	0.940476	0.66	0.58	0.878788	1.399	1.559	109	185	0	21	215	74	0	75	193	67	0	14	953	4279
uc011mqz.1,uc004eet.2	chrX:85116186..85302566,-	CHM	No	No	1.49	1.2	1.852	0.000315393	0.0121984	0.0017504	0.0396442	2.98	2.11	0.708	0.83	0.73	0.879518	0.66	0.51	0.772727	1.861	2.407	5	34	27	23	160	0	0	0	28	0	45	0	322	4910
uc003iex.2,uc003iew.2	chr4:123813805..123844123,-	NUDT6	No	No	1.324	1.103	1.589	0.00257465	0.0483036	0.00163373	0.0391162	3	1.57	0.523	0.84	0.71	0.845238	0.66	0.48	0.727273	1.525	1.771	0	35	12	12	51	46	159	105	51	10	10	14	505	4727
uc001rxg.1,uc001rxj.1	chr12:51373319..51422058,-	SLC11A2	No	No	1.299	1.104	1.53	0.0016565	0.0375174	0.00163193	0.0391162	2.94	1.86	0.633	0.84	0.78	0.928571	0.66	0.57	0.863636	1.403	1.569	92	60	50	16	170	122	0	68	59	3	35	12	687	4545
uc011lml.1,uc003zkh.2	chr9:6716495..7175647,+	KDM4C	No	No	1.466	1.145	1.876	0.00238862	0.046914	0.00162237	0.0391162	3	1.94	0.647	0.83	0.74	0.891566	0.66	0.47	0.712121	1.931	2.573	6	0	0	6	149	0	30	0	11	0	16	0	218	5014
uc003zcn.2,uc003zcq.2	chr8:145635777..145642273,-	SLC39A4	No	No	1.672	1.203	2.326	0.00224478	0.0458329	0.00154839	0.0385411	2.9	2.42	0.834	0.83	0.82	0.987952	0.65	0.61	0.938462	1.413	1.588	0	0	0	25	372	133	0	4	0	0	0	0	534	4698
uc003hoy.2,uc003how.2	chr4:84457261..84527025,+	AGPAT9	No	No	1.735	1.238	2.432	0.00138575	0.0338313	0.00139874	0.0355195	3.03	2.14	0.706	0.83	0.79	0.951807	0.65	0.53	0.815385	1.614	1.943	0	12	0	8	63	43	0	0	0	0	0	0	126	5106
uc002lna.2,uc002lmx.2	chr18:76829397..77138280,+	ATP9B	No	No	1.337	1.115	1.603	0.00174509	0.0388245	0.00136419	0.0353564	2.95	2.11	0.715	0.83	0.78	0.939759	0.66	0.55	0.833333	1.509	1.744	50	11	20	14	165	69	0	63	59	24	0	25	500	4732
uc003zdo.2,uc003zdk.1	chr8:145743391..145750557,+	LRRC14	No	No	1.325	1.116	1.575	0.0013512	0.0338313	0.00133689	0.0350097	2.9	1.8	0.621	0.83	0.8	0.963855	0.66	0.57	0.863636	1.181	1.243	130	21	30	31	180	148	19	20	47	21	46	30	723	4509
uc001drt.2,uc001drq.2	chr1:97187175..97280599,+	PTBP2	No	No	1.845	1.296	2.627	0.000683673	0.0204614	0.00128125	0.0339059	3.04	1.77	0.582	0.83	0.81	0.975904	0.65	0.44	0.676923	1.657	2.025	40	0	0	3	60	0	0	0	0	0	0	0	103	5129
uc002fhn.2,uc010vnx.1	chr16:84211462..84220662,-	TAF1C	No	No	1.577	1.2	2.073	0.00108157	0.0294122	0.00120534	0.0322475	3	2.17	0.723	0.83	0.81	0.975904	0.66	0.49	0.742424	1.48	1.703	1	1	18	11	131	55	0	7	0	9	0	6	239	4993
uc003fkq.2,uc003fkr.2	chr3:180630452..180694948,+	FXR1	No	No	1.382	1.151	1.66	0.000531561	0.0171326	0.00112737	0.0308065	2.96	1.94	0.655	0.83	0.77	0.927711	0.66	0.56	0.848485	1.405	1.577	39	1	0	38	119	67	62	68	81	18	0	19	512	4720
uc010viw.1,uc002eqt.2	chr16:66995138..67009051,+	CES3	No	No	1.314	1.102	1.565	0.00231463	0.0465346	0.00100627	0.0281084	2.86	2.11	0.738	0.84	0.75	0.892857	0.67	0.52	0.776119	1.737	2.124	0	149	0	16	288	46	37	23	195	0	0	0	754	4478
uc004fax.2,uc004faz.2	chrX:138808506..138914447,-	ATP11C	No	No	1.587	1.225	2.056	0.0004705	0.0157712	0.000945358	0.0267037	3	2.17	0.723	0.83	0.78	0.939759	0.65	0.54	0.830769	1.658	2.018	23	28	4	19	130	6	0	3	13	0	0	0	226	5006
uc011mxh.1,uc011mxe.1	chrX:148560297..148615468,-	IDS	No	No	1.48	1.203	1.819	0.000202041	0.00923512	0.000924891	0.0264225	2.95	2.24	0.759	0.83	0.79	0.951807	0.65	0.6	0.923077	1.416	1.595	42	54	3	25	159	58	5	13	35	32	0	3	429	4803
uc004dan.2,uc004dap.2	chrX:23721778..23761407,-	ACOT9	No	No	1.507	1.157	1.962	0.00233228	0.0465346	0.000896279	0.0258994	2.9	2.42	0.834	0.83	0.82	0.987952	0.65	0.59	0.907692	1.405	1.576	6	2	1	9	353	90	8	3	2	16	0	29	519	4713
uc010dic.2,uc002kat.3	chr17:79523915..79604138,-	NPLOC4	No	No	1.292	1.1	1.518	0.00181389	0.0400009	0.000890742	0.0258994	2.93	1.73	0.59	0.84	0.75	0.892857	0.66	0.54	0.818182	1.466	1.669	104	92	32	8	130	50	15	40	32	29	114	22	668	4564
uc001taq.2,uc001tar.2	chr12:88442791..88535993,-	CEP290	No	No	1.671	1.259	2.218	0.000381609	0.0141083	0.000867219	0.0257338	3	2.61	0.87	0.83	0.78	0.939759	0.65	0.55	0.846154	1.801	2.299	15	0	4	20	162	0	0	0	2	0	2	1	206	5026
uc004egc.2,uc004ege.3	chrX:99929491..99987131,-	SYTL4	No	No	1.398	1.148	1.701	0.000837097	0.0244605	0.000829151	0.0253407	2.94	2.11	0.718	0.83	0.78	0.939759	0.66	0.53	0.80303	1.444	1.638	0	142	0	29	119	62	0	97	41	29	0	8	527	4705
uc004egc.2,uc004egd.3	chrX:99929491..99987131,-	SYTL4	No	No	1.335	1.126	1.583	0.000886548	0.0253271	0.000799742	0.0251319	2.94	1.9	0.646	0.84	0.76	0.904762	0.67	0.52	0.776119	1.472	1.679	0	152	6	25	115	69	25	130	116	40	0	12	690	4542
uc004bix.2,uc004biz.3	chr9:117164361..117267730,-	DFNB31	No	No	1.52	1.203	1.922	0.000458204	0.0155665	0.000711237	0.0232214	2.98	2.17	0.728	0.83	0.79	0.951807	0.66	0.52	0.787879	1.619	1.942	3	3	1	9	182	56	0	12	7	11	13	9	306	4926
uc002lim.2,uc010xel.1	chr18:59854524..59974354,+	KIAA1468	No	No	1.545	1.18	2.023	0.00155077	0.0360985	0.000634856	0.0210004	3	2.27	0.757	0.83	0.8	0.963855	0.65	0.56	0.861538	1.518	1.767	0	6	7	25	142	61	0	3	0	0	5	0	249	4983
uc011bpz.1,uc003fix.3	chr3:176738543..176915048,-	TBL1XR1	No	No	1.566	1.233	1.99	0.000236958	0.0104511	0.000630378	0.0210004	3	2.17	0.723	0.83	0.71	0.855422	0.66	0.47	0.712121	2.001	2.728	0	14	29	10	151	0	0	0	0	0	24	0	228	5004
uc001aff.1,uc001afi.2	chr1:1321091..1334718,-	CCNL2	No	No	1.597	1.273	2.003	5.12403e-05	0.00429394	0.000613527	0.0208434	2.98	2.11	0.708	0.83	0.76	0.915663	0.66	0.5	0.757576	1.642	1.981	19	50	49	8	159	31	7	1	0	1	12	16	353	4879
uc010rvu.1,uc001pjq.2	chr11:107661720..107729914,-	SLC35F2	No	No	1.537	1.229	1.922	0.000165465	0.0088506	0.000563312	0.019669	3	1.77	0.59	0.83	0.72	0.86747	0.65	0.52	0.8	1.625	1.953	8	46	18	4	110	69	0	14	3	0	18	0	290	4942
uc001mrk.3,uc001mrj.3	chr11:27387510..27494334,-	LGR4	No	No	1.371	1.137	1.654	0.000956568	0.0265588	0.00054397	0.0194036	2.9	2.11	0.728	0.83	0.82	0.987952	0.65	0.62	0.953846	1.203	1.273	270	109	50	16	194	88	0	0	0	0	33	0	760	4472
uc002use.2,uc002usf.2	chr2:191745547..191829776,+	GLS	No	No	1.575	1.232	2.015	0.000293507	0.0117396	0.000524847	0.0191227	3.03	1.77	0.584	0.83	0.71	0.855422	0.66	0.41	0.621212	1.893	2.492	28	3	0	1	67	18	0	69	13	0	0	0	199	5033
uc003akj.2,uc003akh.2	chr22:31608250..31676064,+	LIMK2	No	No	1.426	1.172	1.735	0.000394194	0.0143624	0.000505853	0.0187017	2.96	1.65	0.557	0.85	0.7	0.823529	0.67	0.5	0.746269	1.739	2.129	11	102	0	0	44	81	1	136	336	11	0	9	731	4501
uc004cmt.3,uc004cmp.2	chr9:140201348..140317714,-	EXD3	No	No	1.344	1.139	1.587	0.000476975	0.0157778	0.000447987	0.0170642	2.84	1.96	0.69	0.84	0.77	0.916667	0.67	0.55	0.820896	1.476	1.674	287	57	0	30	24	17	152	196	338	20	19	8	1148	4084
uc002ykj.1,uc002yki.2	chr21:18885330..18965897,+	CXADR	No	No	1.342	1.144	1.575	0.00030761	0.0120833	0.000445277	0.0170642	2.86	2.07	0.724	0.84	0.77	0.916667	0.68	0.53	0.779412	1.574	1.837	46	10	43	5	357	79	41	171	119	17	0	29	917	4315
uc009zjs.2,uc001rkq.3	chr12:31824073..31882108,-	AMN1	No	No	1.641	1.265	2.129	0.000191128	0.00906595	0.000444122	0.0170642	3	2.11	0.703	0.83	0.78	0.939759	0.65	0.59	0.907692	1.386	1.55	14	0	9	10	70	69	0	2	13	26	13	8	234	4998
uc001kyy.2,uc001kza.2	chr10:111967363..112047121,+	MXI1	No	No	1.36	1.146	1.613	0.000433918	0.0153644	0.000429513	0.0170642	2.86	1.97	0.689	0.85	0.75	0.882353	0.69	0.52	0.753623	1.631	1.919	93	0	0	10	181	157	48	266	381	24	0	20	1180	4052
uc010sso.1,uc001srp.1	chr12:63952693..64062354,-	DPY19L2	No	No	1.884	1.352	2.625	0.000184036	0.0090496	0.000407929	0.0165409	3.03	2.54	0.838	0.83	0.74	0.891566	0.65	0.44	0.676923	2.128	3.073	0	0	0	3	111	0	0	0	0	0	0	0	114	5118
uc010ofc.1,uc001blv.2	chr1:26608773..26644756,-	UBXN11	No	No	1.754	1.336	2.304	5.31703e-05	0.00431194	0.000386673	0.015936	3	2.11	0.703	0.83	0.77	0.927711	0.65	0.48	0.738462	1.645	1.996	0	0	7	0	141	51	0	9	4	0	0	1	213	5019
uc010hpp.2,uc003dvx.2	chr3:105085713..105295743,+	ALCAM	No	No	1.728	1.302	2.293	0.000151299	0.00828428	0.000341429	0.0145484	3	2.4	0.8	0.83	0.72	0.86747	0.65	0.49	0.753846	2.098	2.983	0	7	0	14	117	0	0	0	0	0	12	0	150	5082
uc011kxa.1,uc003wtm.2	chr8:11142000..11185652,+	MTMR9	No	No	1.776	1.312	2.405	0.000200833	0.00923512	0.00025643	0.0115119	3.02	2.42	0.801	0.83	0.73	0.879518	0.65	0.48	0.738462	1.964	2.665	0	3	0	23	86	0	0	0	4	0	17	0	133	5099
uc010zpj.1,uc002wde.1	chr20:251524..271390,-	C20orf96	No	No	1.584	1.267	1.981	5.53527e-05	0.00434865	0.000247786	0.0113261	2.99	1.92	0.642	0.83	0.77	0.927711	0.66	0.51	0.772727	1.55	1.819	32	38	1	4	180	10	43	0	0	9	17	10	344	4888
uc001cdf.1,uc010ois.1	chr1:39547118..39952789,+	MACF1	No	No	1.51	1.217	1.875	0.000186288	0.0090496	0.000239814	0.0111647	2.96	2.08	0.703	0.83	0.75	0.903614	0.66	0.52	0.787879	1.693	2.076	21	39	8	1	175	38	35	1	2	12	6	5	343	4889
uc001oji.2,uc001ojf.2	chr11:66512207..66610987,+	C11orf80	No	No	1.708	1.295	2.253	0.000151582	0.00828428	0.000231024	0.0109584	3	2.27	0.757	0.83	0.78	0.939759	0.65	0.53	0.815385	1.62	1.947	0	2	1	3	154	75	0	0	0	1	2	2	240	4992
uc009zlt.2,uc001rwv.2	chr12:50898768..51142448,+	DIP2B	No	No	1.792	1.36	2.361	3.35474e-05	0.00312363	0.000202648	0.00998935	3	2.24	0.747	0.83	0.72	0.86747	0.65	0.49	0.753846	1.949	2.623	0	25	0	18	109	0	0	0	4	0	15	0	171	5061
uc003uib.2,uc010led.2	chr7:84624874..84816171,-	SEMA3D	No	No	1.969	1.357	2.858	0.000363522	0.0136402	0.000197783	0.00998935	3.02	2.59	0.858	0.83	0.74	0.891566	0.65	0.51	0.784615	1.92	2.573	0	0	0	22	72	0	0	0	0	0	0	0	94	5138
uc001knz.2,uc001kny.2	chr10:99344102..99372553,+	DHDPSL	No	No	1.493	1.189	1.874	0.000548902	0.0174676	0.000192445	0.00998935	2.9	2.14	0.738	0.83	0.82	0.987952	0.66	0.59	0.893939	1.277	1.38	0	0	0	20	250	173	147	0	0	59	0	0	649	4583
uc004bfy.2,uc011lwu.1	chr9:114980715..115095944,-	ROD1	No	No	2.028	1.468	2.801	1.78759e-05	0.00207099	0.000191705	0.00998935	3.04	1.87	0.615	0.83	0.72	0.86747	0.65	0.36	0.553846	2.043	2.859	6	0	0	0	67	11	0	0	0	0	23	0	107	5125
uc009yvi.1,uc001pab.1	chr11:82905291..82967042,+	ANKRD42	No	No	1.403	1.176	1.673	0.000170215	0.00891503	0.000190527	0.00998935	2.95	1.94	0.658	0.84	0.74	0.880952	0.66	0.53	0.80303	1.598	1.894	53	14	67	50	86	53	3	45	125	14	3	3	516	4716
uc003pio.3,uc003pir.2	chr6:79644137..79788011,-	PHIP	No	No	1.856	1.367	2.518	7.19691e-05	0.00523745	0.000146172	0.00854595	3	2.59	0.863	0.83	0.77	0.927711	0.65	0.51	0.784615	1.987	2.715	0	0	0	22	119	0	0	0	2	0	3	0	146	5086
uc002ujg.2,uc002uji.2	chr2:175664042..175870170,-	CHN1	No	No	2.009	1.435	2.814	4.88453e-05	0.00423439	0.000127467	0.00762983	3.03	2.24	0.739	0.83	0.79	0.951807	0.65	0.46	0.707692	1.782	2.27	0	0	0	8	65	44	0	0	0	0	0	0	117	5115
uc003tma.2,uc003tlz.2	chr7:44866488..44887725,-	H2AFV	No	No	1.413	1.187	1.682	9.89113e-05	0.006117	0.000127198	0.00762983	2.72	2.1	0.772	0.84	0.79	0.940476	0.68	0.57	0.838235	1.326	1.442	628	47	16	2	64	64	93	396	416	40	0	7	1773	3459
uc001nmb.3,uc001nlo.3	chr11:57480042..57586651,+	CTNND1	No	No	1.53	1.235	1.896	0.000102193	0.006117	0.00011972	0.00752442	2.98	2.11	0.708	0.83	0.78	0.939759	0.66	0.52	0.787879	1.626	1.949	12	43	31	4	185	62	0	11	23	14	0	11	396	4836
uc011kmj.1,uc003vfc.2	chr7:107788084..108096826,-	NRCAM	No	No	1.787	1.341	2.381	7.29159e-05	0.00523745	0.000113394	0.00750194	3	2.27	0.757	0.83	0.79	0.951807	0.65	0.56	0.861538	1.56	1.842	0	0	0	16	145	26	0	0	6	0	0	25	218	5014
uc002fyb.3,uc002fxz.3	chr17:4442192..4458681,-	MYBBP1A	No	No	1.466	1.188	1.809	0.000362009	0.0136402	9.88043e-05	0.00729884	2.83	1.94	0.686	0.85	0.74	0.870588	0.7	0.48	0.685714	1.801	2.207	0	0	0	64	135	111	0	311	452	0	64	0	1137	4095
uc003bfv.1,uc003bfx.1	chr22:45588123..45636650,-	C22orf9	No	No	1.392	1.166	1.661	0.000251226	0.0105331	9.67646e-05	0.00729884	2.99	1.71	0.572	0.84	0.73	0.869048	0.67	0.46	0.686567	1.751	2.175	8	20	7	4	161	37	34	69	83	17	8	18	466	4766
uc001rwi.3,uc001rwj.3	chr12:50569565..50677353,-	LIMA1	No	No	1.464	1.212	1.769	7.67314e-05	0.00535841	8.347e-05	0.00655761	2.89	1.94	0.671	0.84	0.72	0.857143	0.67	0.49	0.731343	1.934	2.509	1	41	0	4	229	44	1	42	280	0	0	1	643	4589
uc002foi.2,uc010cio.2	chr16:89753076..89762771,+	CDK10	No	No	1.648	1.337	2.032	2.84549e-06	0.000671675	7.17254e-05	0.00601059	3	1.77	0.59	0.83	0.77	0.927711	0.66	0.52	0.787879	1.427	1.614	52	36	21	7	95	40	20	11	17	55	22	9	385	4847
uc002eqm.2,uc002eql.2	chr16:66942026..66952766,-	CDH16	No	No	1.688	1.283	2.219	0.000180536	0.0090496	7.08469e-05	0.00601059	2.96	2.11	0.713	0.82	0.85	1.03659	0.65	0.61	0.938462	1.147	1.196	0	0	0	17	154	112	0	0	0	0	0	90	373	4859
uc003fym.2,uc003fyo.2	chr3:197615947..197686886,-	IQCG	No	No	1.639	1.318	2.039	9.19268e-06	0.00135944	6.16934e-05	0.00574434	2.96	2.25	0.76	0.83	0.79	0.951807	0.66	0.53	0.80303	1.65	1.991	29	4	0	15	222	25	3	7	78	11	1	14	409	4823
uc001aqv.3,uc001aqw.3	chr1:10270764..10441659,+	KIF1B	No	No	1.678	1.313	2.144	3.51433e-05	0.00315536	4.87802e-05	0.00471667	3	2.24	0.747	0.83	0.78	0.939759	0.66	0.54	0.818182	1.588	1.885	40	0	0	2	205	50	1	6	12	3	0	5	324	4908
uc011mjf.1,uc004czm.2	chrX:19552084..19905744,-	SH3KBP1	No	No	1.439	1.201	1.725	8.16514e-05	0.00537531	4.82494e-05	0.00471667	3.02	1.49	0.493	0.84	0.68	0.809524	0.66	0.47	0.712121	1.721	2.123	53	0	42	9	41	33	5	66	78	18	47	13	405	4827
uc004eac.2,uc004eaa.1	chrX:70752933..70795740,+	OGT	No	No	1.773	1.398	2.248	2.33733e-06	0.000652894	3.53199e-05	0.00386062	2.95	2.42	0.82	0.83	0.79	0.951807	0.66	0.54	0.818182	1.733	2.149	19	22	13	21	234	32	0	2	1	0	3	6	353	4879
uc001apz.2,uc001apy.2	chr1:9648977..9674935,+	TMEM201	No	No	1.478	1.235	1.767	1.90978e-05	0.00207099	3.44665e-05	0.00386062	2.86	1.86	0.65	0.84	0.76	0.904762	0.68	0.51	0.75	1.598	1.869	227	2	0	3	123	65	2	292	375	5	2	15	1111	4121
uc001drt.2,uc010oua.1	chr1:97187175..97280599,+	PTBP2	No	No	1.726	1.344	2.217	1.92457e-05	0.00207099	3.30549e-05	0.00386062	2.96	2.3	0.777	0.83	0.83	1	0.65	0.62	0.953846	1.205	1.277	60	3	0	23	168	49	0	0	3	52	0	10	368	4864
uc010zpj.1,uc002wdd.2	chr20:251524..271390,-	C20orf96	No	No	1.821	1.407	2.357	5.13347e-06	0.000860369	2.81099e-05	0.00371939	3	2.01	0.67	0.83	0.73	0.879518	0.66	0.42	0.636364	2.02	2.78	0	5	3	4	146	9	1	12	19	0	0	0	199	5033
uc011lxc.1,uc004bgs.2	chr9:115927800..116037869,-	FKBP15	No	No	1.552	1.275	1.889	1.19735e-05	0.00158428	1.96154e-05	0.00273962	2.96	2.09	0.706	0.83	0.78	0.939759	0.66	0.54	0.818182	1.479	1.696	26	20	67	26	176	83	0	2	3	34	14	11	462	4770
uc010bfh.1,uc002acj.2	chr15:53805938..54051859,-	WDR72	No	No	1.588	1.261	2	8.33879e-05	0.00537531	1.91045e-05	0.00273962	2.95	2.24	0.759	0.83	0.8	0.963855	0.66	0.54	0.818182	1.586	1.878	0	0	0	18	201	88	67	0	0	0	0	25	399	4833
uc010qvl.1,uc001lok.3	chr11:214625..236931,-	SIRT3	No	No	1.7	1.358	2.127	3.57095e-06	0.000690567	8.37658e-06	0.00140391	2.99	1.77	0.592	0.83	0.74	0.891566	0.66	0.5	0.757576	1.572	1.856	31	11	0	5	102	73	91	12	11	13	0	3	352	4880
uc003wmg.2,uc010lqk.1	chr7:155437203..155574179,+	RBM33	No	No	1.776	1.395	2.262	3.20609e-06	0.000671675	8.04606e-06	0.00140391	3	1.94	0.647	0.83	0.73	0.879518	0.66	0.44	0.666667	2.024	2.781	0	2	18	4	164	4	15	2	0	4	15	0	228	5004
uc010flm.2,uc010flk.2	chr2:120770669..120936694,+	EPB41L5	No	No	1.567	1.273	1.93	2.3456e-05	0.00235873	5.955e-06	0.00124556	2.94	1.87	0.636	0.84	0.77	0.916667	0.66	0.53	0.80303	1.476	1.686	6	0	13	3	172	126	188	33	18	13	0	37	609	4623
uc002kqw.2,uc002kqy.2	chr18:12308240..12329822,+	TUBB6	No	No	3.968	2.308	6.823	6.19598e-07	0.000311534	4.69819e-06	0.00109387	3.05	1.08	0.354	0.83	0.5	0.60241	0.65	0.24	0.369231	2.649	4.895	0	0	0	0	3	10	3	5	2	0	0	3	26	5206
uc001usc.3,uc001usb.3	chr13:28874483..29069265,-	FLT1	No	No	1.698	1.364	2.114	2.15265e-06	0.000652894	2.21287e-06	0.000695395	2.86	2.65	0.927	0.83	0.83	1	0.65	0.62	0.953846	1.444	1.636	181	1	2	26	260	90	0	5	0	0	0	7	572	4660
uc003thp.1,uc003thn.1	chr7:40174575..40900357,+	C7orf10	No	No	1.838	1.452	2.326	4.09603e-07	0.000257435	1.4139e-06	0.000528052	2.93	1.94	0.662	0.83	0.77	0.927711	0.66	0.56	0.848485	1.431	1.617	0	207	0	51	167	59	37	0	0	0	0	0	521	4711
uc003pki.3,uc010kbp.2	chr6:84833961..84937335,-	KIAA1009	No	No	2.361	1.711	3.257	1.69493e-07	0.000213052	1.11796e-06	0.000528052	3	2.79	0.93	0.83	0.74	0.891566	0.65	0.49	0.753846	2.081	2.949	0	0	0	29	98	0	0	0	1	0	0	0	128	5104
uc002yqm.2,uc002yqn.2	chr21:34106213..34144169,-	GCFC1	No	No	2	1.533	2.609	3.21719e-07	0.000257435	4.84105e-07	0.00040568	2.99	2.59	0.866	0.83	0.79	0.951807	0.66	0.49	0.742424	1.974	2.666	6	18	1	19	164	1	0	4	0	0	0	13	226	5006
uc002qqo.2,uc010yhl.1	chr19:58360099..58400442,-	ZNF814	No	No	1.978	1.567	2.497	9.4552e-09	2.37704e-05	2.39584e-08	3.01157e-05	3	1.94	0.647	0.83	0.78	0.939759	0.66	0.42	0.636364	1.741	2.168	0	24	0	4	175	68	43	0	0	0	0	3	317	4915
